# Supplementary material for: LaSSO, a strategy for genome-wide mapping of intronic lariats and branch points using RNA-seq
Source: HighWire-hosted journal article supplement (doi:10.1101/gr.166819.113), 2014-04-07
Supplement: Supplemental_Table2.xlsx [file Supplemental_Table2.xlsx]

## Sheet: Contents
Table	Title
Supplemental Table 2	Expression Table, differentially expressed and spliced lists and Gene Ontology enrichment results

## Sheet: Supplemental Table 2
Supplemental Table 2: Expression Table
FC: Fold Change
Exp: Log2 RPKM
space	start	end	width	strand	id	Antisense_To	dbr1_1_reads	dbr1_2_reads	wt_1_reads	wt_2_reads	dbr1_1_exp	dbr1_2_exp	wt_1_exp	wt_2_exp	WT_DBR1_COMPARISON_DESeq_baseMean	WT_DBR1_COMPARISON_DESeq_baseMeanA	WT_DBR1_COMPARISON_DESeq_baseMeanB	WT_DBR1_COMPARISON_DESeq_FC	WT_DBR1_COMPARISON_DESeq_log2_FC	WT_DBR1_COMPARISON_DESeq_pval	WT_DBR1_COMPARISON_DESeq_Adjusted_Pvalue	Intron_embedded_in	Intron_surrounded_by	exon_intron_reads_dbr1_1	exon_intron_reads_dbr1_2	exon_intron_reads_wt_1	exon_intron_reads_wt_2	log2_Splicing_Efficiency_dbr1_1	log2_Splicing_Efficiency_dbr1_2	log2_Splicing_Efficiency_wt_1	log2_Splicing_Efficiency_wt_2	log2_Fold_Change_WT/DBR1_Splicing_Efficiency_rep1	log2_Fold_Change_WT/DBR1_Splicing_Efficiency_rep2	qvalue_Splicing_Efficiency
I	7619	9274	1656	1	SPAC212.09c	NULL	2	1	0	0	-4.31771	-5.02572	-16.6096	-16.6096	0.810982	0	1.62196	Inf	Inf	0.488521	0.674556	NA	NA	0	0	0	0	0	0	0	0	0	0	1
I	11784	12994	1211	1	SPAC212.08c	NULL	1	0	0	2	-4.86608	-16.6096	-16.6096	-4.43341	0.616135	0.736627	0.495642	0.672853	-0.571636	1	1	NA	NA	0	0	0	0	0	0	0	0	0	0	1
I	13665	14555	891	1	SPAC212.07c	NULL	2	2	3	1	-3.42364	-3.13186	-2.88558	-4.99056	2.10351	1.95437	2.25264	1.15262	0.204916	1	1	NA	NA	0	0	0	0	0	0	0	0	0	0	1
I	15855	16226	372	1	SPAC212.12	NULL	0	0	0	0	-16.6096	-16.6096	-16.6096	-16.6096	0	0	0	NA	NA	NA	NA	NA	NA	0	0	0	0	0	0	0	0	0	0	1
I	18042	18974	933	1	SPAC212.06c	NULL	1	0	0	0	-4.42349	-16.6096	-16.6096	-16.6096	0.247821	0	0.495642	Inf	Inf	0.967065	1	NA	NA	0	0	0	0	0	0	0	0	0	0	1
I	20824	21015	192	1	SPAC212.05c	NULL	0	0	0	0	-16.6096	-16.6096	-16.6096	-16.6096	0	0	0	NA	NA	NA	NA	NA	NA	0	0	0	0	0	0	0	0	0	0	1
I	21381	23050	1670	1	SPAC212.04c	NULL	28	18	34	49	-0.474459	-0.82007	-0.24121	-0.234326	30.6265	36.0227	25.2302	0.700398	-0.513752	0.325542	0.505865	NA	NA	0	0	0	0	0	0	0	0	0	0	1
I	28738	29657	920	1	SPAC212.01c	NULL	0	0	0	0	-16.6096	-16.6096	-16.6096	-16.6096	0	0	0	NA	NA	NA	NA	NA	NA	0	0	0	0	0	0	0	0	0	0	1
I	29764	31069	1306	1	SPAC977.01	NULL	3	1	5	9	-3.39034	-4.68327	-2.70029	-2.37267	4.03793	5.95825	2.11761	0.355407	-1.49245	0.370606	0.557209	NA	NA	0	0	0	0	0	0	0	0	0	0	1
I	32034	33012	979	1	SPAC977.02	SPAC977.18	0	0	0	0	-16.6096	-16.6096	-16.6096	-16.6096	0	0	0	NA	NA	NA	NA	NA	NA	0	0	0	0	0	0	0	0	0	0	1
I	33835	34272	438	1	SPAC977.03	NULL	0	0	0	0	-16.6096	-16.6096	-16.6096	-16.6096	0	0	0	NA	NA	NA	NA	NA	NA	0	0	0	0	0	0	0	0	0	0	1
I	34298	34978	681	1	SPAC977.04	NULL	0	0	0	0	-16.6096	-16.6096	-16.6096	-16.6096	0	0	0	NA	NA	NA	NA	NA	NA	0	0	0	0	0	0	0	0	0	0	1
I	39416	40072	657	1	SPAC977.06	NULL	0	0	0	1	-16.6096	-16.6096	-16.6096	-4.43697	0.184157	0.368314	0	0	#NAME?	1	1	NA	NA	0	0	0	0	0	0	0	0	0	0	1
I	40795	41489	695	1	SPNCRNA.136	SPNCRNA.601	0	0	0	0	-16.6096	-16.6096	-16.6096	-16.6096	0	0	0	NA	NA	NA	NA	NA	NA	0	0	0	0	0	0	0	0	0	0	1
I	44644	45468	825	1	SPAC977.08	NULL	0	0	0	0	-16.6096	-16.6096	-16.6096	-16.6096	0	0	0	NA	NA	NA	NA	NA	NA	0	0	0	0	0	0	0	0	0	0	1
I	50946	53858	2913	1	SPAC977.10	SPNCRNA.602	716	547	1604	2258	3.38966	3.29306	4.50645	4.47945	1189.76	1679.66	699.862	0.416668	-1.26303	1.5834e-22	2.64723e-21	NA	NA	0	0	0	0	0	0	0	0	0	0	1
I	51158	51583	426	1	SPNCRNA.19	SPNCRNA.602	68	50	65	121	2.72824	2.57645	2.61629	2.99242	72.0841	78.9305	65.2377	0.82652	-0.274878	0.367377	0.553532	NA	NA	0	0	0	0	0	0	0	0	0	0	1
I	55059	56308	1250	1	SPAC977.11	NULL	27	17	35	66	-0.157324	-0.53293	0.170212	0.564957	33.4583	42.8127	24.1039	0.563008	-0.828772	0.0779768	0.160006	NA	NA	0	0	0	0	0	0	0	0	0	0	1
I	56373	57736	1364	1	SPAC977.12	NULL	496	491	886	1191	3.91605	4.19325	4.70616	4.6126	731.29	907.077	555.503	0.612409	-0.707432	4.20472e-07	2.40236e-06	NA	NA	0	0	0	0	0	0	0	0	0	0	1
I	62961	63862	902	1	SPAC977.15	NULL	197	164	331	494	3.18055	3.20787	3.88233	3.93965	279.007	356.942	201.073	0.563322	-0.827969	7.86916e-06	3.72923e-05	NA	NA	0	0	0	0	0	0	0	0	0	0	1
I	66219	69821	3603	1	SPAC977.17	SPAC977.16c	469	290	1466	1971	2.43395	2.03223	4.03132	3.938	958.176	1501	415.353	0.276718	-1.85351	3.16526e-40	7.69146e-39	NA	NA	0	0	0	0	0	0	0	0	0	0	1
I	71030	71470	441	1	SPNCRNA.137	NULL	0	1	2	2	-16.6096	-3.11721	-2.45593	-2.97626	1.21234	1.794	0.63068	0.35155	-1.5082	0.746705	0.885716	NA	NA	0	0	0	0	0	0	0	0	0	0	1
I	72344	72414	71	1	SPNCRNA.83	SPNCRNA.37	0	0	0	0	-16.6096	-16.6096	-16.6096	-16.6096	0	0	0	NA	NA	NA	NA	NA	NA	0	0	0	0	0	0	0	0	0	0	1
I	79209	79317	109	1	SPNCRNA.138	NULL	0	0	0	0	-16.6096	-16.6096	-16.6096	-16.6096	0	0	0	NA	NA	NA	NA	NA	NA	0	0	0	0	0	0	0	0	0	0	1
I	79543	79628	86	1	SPNCRNA.76	NULL	0	0	0	0	-16.6096	-16.6096	-16.6096	-16.6096	0	0	0	NA	NA	NA	NA	NA	NA	0	0	0	0	0	0	0	0	0	0	1
I	82746	84786	2041	1	SPAC1F8.01	NULL	34	24	50	116	-0.532092	-0.742775	-0.0225609	0.671196	50.5734	69.1587	31.9882	0.462533	-1.11237	0.0193738	0.0481696	NA	NA	0	0	0	0	0	0	0	0	0	0	1
I	90868	91753	886	1	SPNCRNA.139	SPNCRNA.604	41	17	19	100	0.941881	-0.0363868	-0.21459	1.66096	38.9596	46.8764	31.0429	0.662229	-0.594598	0.566318	0.747618	NA	NA	0	0	0	0	0	0	0	0	0	0	1
I	90949	94038	3090	1	SPNCRNA.605	c("SPNCRNA.604", "SPAC1F8.04c")	1596	1026	884	1629	4.42234	4.07672	3.52314	3.88465	1252.73	1067.34	1438.12	1.34739	0.430166	0.0675453	0.141875	NA	NA	0	0	0	0	0	0	0	0	0	0	1
I	95961	96966	1006	1	SPAC1F8.05	SPNCRNA.606	256	182	72	118	3.40107	3.20068	1.52414	1.7165	161.597	81.5264	241.668	2.96429	1.56769	2.70457e-11	2.44654e-10	NA	NA	0	0	0	0	0	0	0	0	0	0	1
I	99871	101431	1561	1	SPAC1F8.06	SPNCRNA.607	652	600	543	703	4.11596	4.28786	3.80518	3.65739	623.784	546.001	701.567	1.28492	0.361678	0.0143873	0.0369501	NA	NA	0	0	0	0	0	0	0	0	0	0	1
I	103941	104953	1013	1	SPAC1F8.08	NULL	201	186	183	256	3.04212	3.22204	2.85991	2.82385	203.984	191.038	216.931	1.13554	0.183376	0.41861	0.605824	NA	NA	0	0	0	0	0	0	0	0	0	0	1
I	106893	108361	1469	1	SPAC11D3.19	NULL	84	45	106	124	1.24719	0.638542	1.53594	1.24185	85.8631	101.712	70.0146	0.688364	-0.538757	0.112612	0.218172	NA	NA	0	0	0	0	0	0	0	0	0	0	1
I	109628	112377	2750	1	SPNCRNA.608	c("SPAC11D3.02c", "SPAC11D3.03c")	297	229	331	371	2.16459	2.08129	2.2741	1.91833	301.635	311.639	291.631	0.935798	-0.0957306	0.736686	0.8773	NA	NA	0	0	0	0	0	0	0	0	0	0	1
I	113950	115962	2013	1	SPAC11D3.05	SPAC11D3.04c	322	291	768	1117	2.73127	2.87704	3.93846	3.95855	580.281	817.437	343.125	0.419757	-1.25237	5.73004e-17	7.75462e-16	NA	NA	0	0	0	0	0	0	0	0	0	0	1
I	116331	118189	1859	1	SPAC11D3.06	SPAC11D3.07c	357	331	731	1383	2.99496	3.17768	3.98205	4.38154	640.773	895.847	385.699	0.430542	-1.21578	2.17787e-05	9.62206e-05	NA	NA	0	0	0	0	0	0	0	0	0	0	1
I	122187	124116	1930	1	SPAC11D3.09	SPAC11D3.08c	365	273	124	179	2.97285	2.84567	1.36845	1.3777	242.285	131.485	353.085	2.68536	1.42512	7.81291e-13	8.10598e-12	NA	NA	0	0	0	0	0	0	0	0	0	0	1
I	124907	129053	4147	1	SPAC11D3.10	SPAC11D3.11c	376	279	348	517	1.91222	1.77357	1.75372	1.80444	368.361	374.401	362.321	0.967736	-0.0473139	0.794057	0.920519	NA	NA	0	0	0	0	0	0	0	0	0	0	1
I	130148	131268	1121	1	SPAC11D3.13	SPAC11D3.14c	1039	816	1045	1928	5.26589	5.20915	5.22735	5.59059	1146.1	1262.59	1029.61	0.815476	-0.294287	0.112688	0.218249	NA	NA	0	0	0	0	0	0	0	0	0	0	1
I	131203	135541	4339	1	SPNCRNA.609	SPAC11D3.14c	1471	1017	910	1284	3.81492	3.57426	3.07521	3.05155	1162.26	954.019	1370.49	1.43655	0.522604	2.36095e-05	0.000103812	NA	NA	0	0	0	0	0	0	0	0	0	0	1
I	135569	135926	358	1	SPNCRNA.147	SPAC11D3.14c	2	0	3	3	-2.10827	-16.6096	-1.57018	-2.09053	1.84114	2.691	0.991284	0.368371	-1.44077	0.708518	0.862225	NA	NA	0	0	0	0	0	0	0	0	0	0	1
I	136139	140365	4227	1	SPAC11D3.15	SPNCRNA.610	954	827	2048	2858	3.22791	3.31363	4.28321	4.24364	1564.9	2135.39	994.415	0.465683	-1.10258	1.58202e-19	2.39176e-18	NA	NA	0	0	0	0	0	0	0	0	0	0	1
I	141199	144768	3570	1	SPAC11D3.17	SPAC11D3.16c	964	688	764	963	3.5062	3.31139	3.12388	2.93748	835.154	758.602	911.707	1.20183	0.265227	0.0325986	0.075546	NA	NA	0	0	0	0	0	0	0	0	0	0	1
I	144733	146501	1769	1	SPNCRNA.611	SPAC11D3.18c	87	73	177	194	1.02972	1.06841	2.00752	1.61947	127.095	165.03	89.1605	0.540268	-0.888253	0.00104364	0.00345788	NA	NA	0	0	0	0	0	0	0	0	0	0	1
I	146974	148055	1082	1	SPAC5H10.01	c("SPNCRNA.612", "SPAC5H10.02c")	130	105	164	266	2.31837	2.30206	2.6067	2.78407	157.665	184.676	130.655	0.707482	-0.499234	0.0261342	0.062543	NA	NA	0	0	0	0	0	0	0	0	0	0	1
I	148362	149005	644	1	SPNCRNA.613	SPAC5H10.02c	152	154	100	100	3.2925	3.60317	2.64157	2.12121	131.081	89.6999	172.462	1.92266	0.943103	0.00184429	0.00578794	NA	NA	0	0	0	0	0	0	0	0	0	0	1
I	149446	152909	3464	1	SPAC5H10.03	SPAC5H10.02c	15687	12913	12218	17183	7.55454	7.56561	7.14713	7.11874	14353.7	12788.2	15919.1	1.24483	0.315945	0.00258302	0.0078777	NA	NA	0	0	0	0	0	0	0	0	0	0	1
I	149658	149776	119	1	SPRRNA.10	SPAC5H10.02c	0	0	0	0	-16.6096	-16.6096	-16.6096	-16.6096	0	0	0	NA	NA	NA	NA	NA	NA	0	0	0	0	0	0	0	0	0	0	1
I	152851	155515	2665	1	SPAC5H10.04	SPAC5H10.05c	417	358	175	226	2.69947	2.7712	1.39993	1.24853	304.113	175.759	432.466	2.46057	1.29899	1.20087e-12	1.22683e-11	NA	NA	0	0	0	0	0	0	0	0	0	0	1
I	158777	159472	696	1	SPAC5H10.07	NULL	59	40	53	77	1.81519	1.54629	1.61361	1.63211	55.4253	56.3805	54.4701	0.966116	-0.0497315	0.946182	1	NA	NA	0	0	0	0	0	0	0	0	0	0	1
I	161072	162819	1748	1	SPNCRNA.614	c("SPAC5H10.09c", "SPNCRNA.615")	178	140	248	322	2.07973	2.0251	2.51134	2.3677	213.115	249.711	176.52	0.706895	-0.500432	0.01755	0.0441472	NA	NA	0	0	0	0	0	0	0	0	0	0	1
I	162756	164635	1880	1	SPAC5H10.10	SPNCRNA.615	2144	1766	1183	1551	5.56506	5.57705	4.66035	4.53073	1686.56	1196.69	2176.44	1.81872	0.86292	5.49749e-13	5.77862e-12	NA	NA	0	0	0	0	0	0	0	0	0	0	1
I	164570	166335	1766	1	SPAC5H10.11	SPAC5H10.12c	98	123	45	51	1.20393	1.82355	0.0342262	-0.30556	84.3607	42.5748	126.147	2.96294	1.56703	0.00373593	0.0110241	NA	NA	0	0	0	0	0	0	0	0	0	0	1
I	166583	167280	698	1	SPNCRNA.616	SPAC5H10.12c	18	25	41	55	0.0983399	0.864079	1.2391	1.14255	33.311	41.9334	24.6886	0.588757	-0.764255	0.0921234	0.184585	NA	NA	0	0	0	0	0	0	0	0	0	0	1
I	170237	174473	4237	1	SPNCRNA.617	SPAC13G6.01c	478	436	444	640	2.22753	2.38666	2.07422	2.08137	491.175	470.457	511.894	1.08808	0.121781	0.494049	0.680344	NA	NA	0	0	0	0	0	0	0	0	0	0	1
I	170709	170856	148	1	SPSNORNA.49	SPAC13G6.01c	34	27	44	63	3.2535	3.21273	3.57861	3.57609	40.1731	46.4659	33.8802	0.729141	-0.455731	0.298476	0.474871	NA	NA	0	0	0	0	0	0	0	0	0	0	1
I	175890	180028	4139	1	SPAC13G6.03	c("SPAC13G6.02c", "SPNCRNA.618")	2149	1524	2098	3184	4.42987	4.22588	4.34836	4.42982	2154.09	2281.89	2026.29	0.887987	-0.171389	0.148191	0.273379	NA	NA	0	0	0	0	0	0	0	0	0	0	1
I	175923	176736	814	1	SPNCRNA.141	SPAC13G6.02c	90	77	89	118	2.19846	2.2652	2.13548	2.02203	91.8421	90.514	93.1702	1.02935	0.0417268	0.902719	0.990153	NA	NA	0	0	0	0	0	0	0	0	0	0	1
I	180272	181069	798	1	SPAC13G6.04	SPAC13G6.05c	782	470	871	1205	5.82412	5.38142	5.93277	5.88069	794.157	904.303	684.012	0.756397	-0.402785	0.0300028	0.0705174	NA	NA	0	0	0	0	0	0	0	0	0	0	1
I	187701	190031	2331	1	SPAC13G6.08	SPNCRNA.619	171	120	145	237	1.60661	1.38746	1.32181	1.51028	162.193	163.95	160.436	0.978571	-0.0312518	0.89029	0.98344	NA	NA	0	0	0	0	0	0	0	0	0	0	1
I	190192	191947	1756	1	SPAC13G6.09	c("SPNCRNA.619", "SPAC13G6.10c")	1564	1370	2398	3291	5.33277	5.43352	5.9025	5.83884	2059.56	2479.91	1639.22	0.660999	-0.597281	2.59876e-07	1.52844e-06	NA	NA	0	0	0	0	0	0	0	0	0	0	1
I	198884	199231	348	1	SPAC13G6.13	SPAC13G6.12c	1	1	0	0	-3.06734	-2.77555	-16.6096	-16.6096	0.563161	0	1.12632	Inf	Inf	0.69034	0.850227	NA	NA	0	0	0	0	0	0	0	0	0	0	1
I	200121	201517	1397	1	SPAC13G6.14	SPNCRNA.620	989	871	1234	1801	4.8772	4.98571	5.14964	5.17473	1177.62	1315.73	1039.51	0.790065	-0.339957	0.00539092	0.0153347	NA	NA	0	0	0	0	0	0	0	0	0	0	1
I	204386	206081	1696	1	SPAC24B11.05	NULL	923	699	976	1291	4.49775	4.38853	4.53145	4.41462	944.907	991.49	898.323	0.906033	-0.142364	0.328205	0.508883	NA	NA	0	0	0	0	0	0	0	0	0	0	1
I	206775	209401	2627	1	SPNCRNA.622	c("SPAC24B11.06c", "SPAC24B11.07c")	254	191	155	250	2.00497	1.88553	1.24556	1.41486	210.189	174.025	246.353	1.41562	0.501435	0.0169082	0.0427478	NA	NA	0	0	0	0	0	0	0	0	0	0	1
I	213841	214818	978	1	SPNCRNA.142	SPNCRNA.623	190	164	425	471	3.01165	3.09116	4.12626	3.75416	297.885	398.167	197.604	0.496283	-1.01077	0.000147375	0.000571596	NA	NA	0	0	0	0	0	0	0	0	0	0	1
I	214093	216962	2870	1	SPAC24B11.09	SPNCRNA.623	3128	2231	3156	4477	5.49967	5.30394	5.46568	5.44975	3137.44	3317.47	2957.42	0.891467	-0.165747	0.165172	0.297841	NA	NA	0	0	0	0	0	0	0	0	0	0	1
I	230545	231136	592	1	SPAC24B11.14	SPNCRNA.624	12	8	30	38	-0.00820516	-0.301351	1.26686	1.08753	20.4248	29.8565	10.9931	0.3682	-1.44144	0.0237559	0.0575279	NA	NA	0	0	0	0	0	0	0	0	0	0	1
I	231311	233488	2178	1	SPAC24B11.13	SPAC806.02c	2837	2120	4713	6300	5.75685	5.62836	6.44227	6.34061	3777.63	4812.07	2743.18	0.570062	-0.810809	5.63975e-13	5.91779e-12	NA	NA	0	0	0	0	0	0	0	0	0	0	1
I	235280	237141	1862	1	SPNCRNA.625	c("SPAC806.03c", "SPAC806.11", "SPNCRNA.03")	130	101	75	118	1.53522	1.46288	0.694819	0.82828	105.622	83.1124	128.132	1.54167	0.624497	0.0247929	0.059666	NA	NA	0	0	0	0	0	0	0	0	0	0	1
I	236819	236928	110	1	SPNCRNA.143	NULL	4	3	0	2	0.594134	0.470912	-16.6096	-0.973065	2.30562	0.736627	3.87461	5.25993	2.39504	0.354971	0.539035	NA	NA	0	0	0	0	0	0	0	0	0	0	1
I	237903	238881	979	1	SPNCRNA.627	SPNCRNA.626	31	27	13	25	0.394527	0.487031	-0.90607	-0.483023	24.237	16.0808	32.3933	2.01441	1.01036	0.0834797	0.169743	NA	NA	0	0	0	0	0	0	0	0	0	0	1
I	238509	238898	390	1	SPNCRNA.144	SPNCRNA.626	13	12	8	14	0.468604	0.64494	-0.278684	0.00830495	11.6987	9.38588	14.0115	1.49283	0.578049	0.534248	0.716789	NA	NA	0	0	0	0	0	0	0	0	0	0	1
I	238998	240617	1620	1	SPNCRNA.628	SPNCRNA.626	78	69	75	81	0.999116	1.11405	0.895677	0.486348	75.8309	69.4848	82.177	1.18266	0.242037	0.415337	0.603002	NA	NA	0	0	0	0	0	0	0	0	0	0	1
I	239730	240571	842	1	SPNCRNA.145	NULL	64	57	64	75	1.65781	1.78252	1.61096	1.31941	64.5646	61.4594	67.6699	1.10105	0.13888	0.677852	0.841462	NA	NA	0	0	0	0	0	0	0	0	0	0	1
I	244214	247574	3361	1	SPAC806.05	SPAC806.06c	989	771	917	1148	3.63313	3.56571	3.47723	3.28099	942.037	907.629	976.445	1.07582	0.105436	0.357475	0.542221	NA	NA	0	0	0	0	0	0	0	0	0	0	1
I	247821	248560	740	1	SPAC806.07	SPNCRNA.629	3846	3114	2694	4039	7.75325	7.74047	7.19278	7.25667	3391.04	2911.9	3870.18	1.32909	0.41044	0.000292058	0.00107806	NA	NA	0	0	0	0	0	0	0	0	0	0	1
I	253719	255964	2246	1	SPNCRNA.630	c("SPAC1639.01c", "SPAC1639.02c")	96	74	158	193	0.827313	0.743618	1.49927	1.26759	124.434	154.617	94.252	0.609584	-0.714103	0.00694612	0.01923	NA	NA	0	0	0	0	0	0	0	0	0	0	1
I	256086	257001	916	1	SPNCRNA.631	SPAC1639.02c	4	1	1	1	-2.46364	-4.17165	-4.51025	-5.03047	1.75512	0.896999	2.61325	2.91332	1.54267	0.572762	0.752313	NA	NA	0	0	0	0	0	0	0	0	0	0	1
I	259603	271053	11451	1	SPAC1F5.11c	c("SPNCRNA.632", "SPAC1F5.10")	8847	5840	11426	17171	5.01098	4.70357	5.33318	5.40047	10216.6	12365.1	8068.12	0.652492	-0.615967	3.16065e-08	2.09731e-07	NA	NA	0	0	0	0	0	0	0	0	0	0	1
I	271077	272457	1381	1	SPNCRNA.633	SPAC1F5.10	62	42	17	27	0.898191	0.628128	-1.01538	-0.868318	38.0753	18.9321	57.2184	3.02229	1.59564	0.000397669	0.00142966	NA	NA	0	0	0	0	0	0	0	0	0	0	1
I	273152	274921	1770	1	SPAC1F5.09c	SPNCRNA.634	308	265	445	622	2.85274	2.92762	3.33676	3.2995	392.072	464.356	319.788	0.68867	-0.538116	0.00108794	0.0035898	NA	NA	0	0	0	0	0	0	0	0	0	0	1
I	275089	276661	1573	1	SPAC1F5.08c	SPAC1F5.06	1013	868	836	1199	4.7406	4.80955	4.41669	4.41658	966.553	883.589	1049.52	1.18779	0.248276	0.0680386	0.142686	NA	NA	0	0	0	0	0	0	0	0	0	0	1
I	276723	278573	1851	1	SPAC1F5.07c	SPAC1F5.06	1074	911	1259	1933	4.59017	4.64452	4.7726	4.8708	1242.22	1377.57	1106.87	0.803497	-0.315636	0.00847604	0.0229469	NA	NA	0	0	0	0	0	0	0	0	0	0	1
I	281774	282745	972	1	SPAC1F5.05c	NULL	770	713	850	1014	5.03939	5.22024	5.13514	4.8693	827.086	822.853	831.319	1.01029	0.0147687	0.916275	0.998311	NA	NA	0	0	0	0	0	0	0	0	0	0	1
I	283287	289200	5914	1	SPAC1F5.04c	NULL	3955	3077	5509	7565	4.79503	4.72469	5.22629	5.16347	4799.84	5698.82	3900.87	0.684504	-0.546869	6.29967e-07	3.51236e-06	NA	NA	0	0	0	0	0	0	0	0	0	0	1
I	289790	291927	2138	1	SPAC1F5.03c	NULL	2991	2254	4238	6210	6.00229	5.88596	6.45819	6.48904	3715.91	4527.8	2904.02	0.641376	-0.640758	7.5542e-09	5.45612e-08	NA	NA	0	0	0	0	0	0	0	0	0	0	1
I	294010	294228	219	1	SPNCRNA.148	NULL	0	0	1	0	-16.6096	-16.6096	-2.44608	-16.6096	0.264343	0.528686	0	0	#NAME?	1	1	NA	NA	0	0	0	0	0	0	0	0	0	0	1
I	299464	299610	147	1	SPNCRNA.27	SPAC18B11.10	0	2	1	1	-16.6096	-0.532353	-1.87099	-2.39133	1.07918	0.896999	1.26136	1.4062	0.491802	1	1	NA	NA	0	0	0	0	0	0	0	0	0	0	1
I	300705	301411	707	1	SPNCRNA.635	SPAC18B11.10	19	18	6	25	0.157859	0.371668	-1.55193	-0.0134297	16.5747	12.38	20.7694	1.67767	0.746457	0.372925	0.559966	NA	NA	0	0	0	0	0	0	0	0	0	0	1
I	303004	304161	1158	1	SPAC18B11.09c	NULL	523	445	623	968	4.55597	4.61477	4.76153	4.87694	612.886	685.899	539.874	0.787104	-0.345374	0.013255	0.0343762	NA	NA	0	0	0	0	0	0	0	0	0	0	1
I	304355	305168	814	1	SPAC18B11.08c	NULL	778	643	1149	1617	5.91572	5.93258	6.4314	6.40398	997.08	1203.02	791.137	0.657624	-0.604665	3.64849e-06	1.83172e-05	NA	NA	0	0	0	0	0	0	0	0	0	0	1
I	305602	306762	1161	1	SPAC18B11.07c	NULL	780	580	545	880	5.43592	5.30031	4.87185	5.04273	682.323	612.25	752.395	1.2289	0.297371	0.041663	0.0935858	NA	NA	0	0	0	0	0	0	0	0	0	0	1
I	311920	314040	2121	1	SPAC18B11.03c	SPNCRNA.636	525	475	416	583	3.40323	3.55065	3.02064	2.98719	497.223	434.66	559.785	1.28787	0.364986	0.0218937	0.0535833	NA	NA	0	0	0	0	0	0	0	0	0	0	1
I	313974	315335	1362	1	SPAC18B11.02c	SPNCRNA.636	949	698	1104	1548	4.85424	4.70287	5.02564	4.99295	1032.2	1153.82	910.579	0.789188	-0.34156	0.0104234	0.0277189	NA	NA	0	0	0	0	0	0	0	0	0	0	1
I	315394	317585	2192	1	SPAC12G12.16c	c("SPNCRNA.636", "SPAC12G12.15")	318	217	216	326	2.59034	2.33082	1.98549	2.05897	264.369	234.266	294.472	1.257	0.32998	0.0745452	0.15415	NA	NA	0	0	0	0	0	0	0	0	0	0	1
I	317718	319171	1454	1	SPNCRNA.637	SPAC12G12.15	60	57	19	35	0.776572	0.994384	-0.929228	-0.568241	44.3117	22.936	65.6873	2.86394	1.518	0.00043566	0.00155183	NA	NA	0	0	0	0	0	0	0	0	0	0	1
I	319815	321825	2011	1	SPAC12G12.14c	SPNCRNA.638	1606	1283	2021	2743	5.05104	5.01891	5.33579	5.25611	1841.96	2078.76	1605.16	0.772175	-0.373001	0.00185879	0.00583039	NA	NA	0	0	0	0	0	0	0	0	0	0	1
I	321764	324129	2366	1	SPAC12G12.13c	c("SPNCRNA.638", "SPAC12G12.12")	3289	2646	3702	5123	5.85068	5.82866	5.97448	5.92281	3571.51	3844.06	3298.95	0.858192	-0.220627	0.0478441	0.105787	NA	NA	0	0	0	0	0	0	0	0	0	0	1
I	326440	328122	1683	1	SPAC12G12.11c	NULL	1545	1306	1770	2434	5.42584	5.47521	5.57513	5.51435	1710.84	1832.25	1589.44	0.867478	-0.205101	0.082793	0.168534	NA	NA	0	0	0	0	0	0	0	0	0	0	1
I	332838	333578	741	1	SPAC12G12.17	SPAC12G12.08	558	424	727	891	5.06915	4.96477	5.40399	5.1771	628.249	712.522	543.977	0.763453	-0.389389	0.0112461	0.029605	NA	NA	0	0	0	0	0	0	0	0	0	0	1
I	334615	336131	1517	1	SPAC12G12.07c	SPAC12G12.08	4990	4406	4945	7109	7.13871	7.25095	7.07878	7.0821	5242.36	5232.69	5252.03	1.0037	0.00532225	0.954893	1	NA	NA	0	0	0	0	0	0	0	0	0	0	1
I	336308	338157	1850	1	SPAC12G12.06c	NULL	1859	1592	3015	4202	5.38249	5.45061	6.03326	5.99182	2533.54	3141.64	1925.44	0.612878	-0.706329	5.28212e-10	4.27268e-09	NA	NA	0	0	0	0	0	0	0	0	0	0	1
I	338286	339763	1478	1	SPAC12G12.05c	SPSNORNA.29	1495	1226	2053	2887	5.39198	5.39761	5.80272	5.77419	1831.46	2148.71	1514.2	0.7047	-0.504918	1.93065e-05	8.60266e-05	NA	NA	0	0	0	0	0	0	0	0	0	0	1
I	340209	341954	1746	1	SPNCRNA.639	SPAC12G12.04	11	5	2	1	-1.93487	-2.78051	-4.4409	-5.96067	5.01557	1.42568	8.60546	6.03602	2.5936	0.0536996	0.117138	NA	NA	0	0	0	0	0	0	0	0	0	0	1
I	345363	346322	960	1	SPNCRNA.640	SPAC12G12.02	17	14	11	11	-0.443924	-0.432218	-1.1188	-1.63915	13.5612	9.86699	17.2554	1.7488	0.806369	0.271894	0.442492	NA	NA	0	0	0	0	0	0	0	0	0	0	1
I	346795	350151	3357	1	SPAC12G12.01c	SPAC12G12.02	2771	2049	4205	6092	5.09872	4.95505	5.65356	5.66801	3566.29	4466.89	2665.69	0.596766	-0.744763	2.72692e-11	2.46305e-10	NA	NA	0	0	0	0	0	0	0	0	0	0	1
I	350406	352296	1891	1	SPAC630.03	SPAC630.04c	4679	3683	7475	10577	6.92722	6.87372	7.55624	7.53666	6244.74	7847.58	4641.9	0.591508	-0.757531	1.90487e-12	1.91668e-11	NA	NA	0	0	0	0	0	0	0	0	0	0	1
I	353783	356580	2798	1	SPAC630.05	SPAC630.06c	1301	1097	1438	2098	4.27071	4.31647	4.3683	4.39289	1434.83	1532.97	1336.69	0.871958	-0.19767	0.0925085	0.185109	NA	NA	0	0	0	0	0	0	0	0	0	0	1
I	358613	359235	623	1	SPNCRNA.641	SPAC630.07c	44	42	28	52	1.55183	1.77653	0.852903	1.22562	41.1262	33.9555	48.2968	1.42236	0.508283	0.2865	0.459718	NA	NA	0	0	0	0	0	0	0	0	0	0	1
I	361557	363654	2098	1	SPAC630.15	c("SPNCRNA.642", "SPAC630.09c")	220	182	164	235	2.12205	2.1403	1.65139	1.64999	198.542	173.258	223.825	1.29186	0.369449	0.0839327	0.170507	NA	NA	0	0	0	0	0	0	0	0	0	0	1
I	365155	365226	72	1	SPATRNAPRO.01	NULL	120	171	54	95	6.11245	6.91523	4.91359	5.2082	115.431	63.5388	167.323	2.6334	1.39693	0.0413209	0.0929391	NA	NA	0	0	0	0	0	0	0	0	0	0	1
I	365204	366442	1239	1	SPAC630.10	NULL	900	711	1135	1678	4.91431	4.86604	5.20215	5.24583	1056.29	1218.09	894.492	0.73434	-0.445479	0.000515938	0.00181675	NA	NA	0	0	0	0	0	0	0	0	0	0	1
I	366634	367890	1257	1	SPAC630.11	NULL	239	194	261	411	3.44188	3.43274	3.52206	3.65679	265.087	289.364	240.81	0.832206	-0.264987	0.142211	0.264005	NA	NA	0	0	0	0	0	0	0	0	0	0	1
I	368040	369950	1911	1	SPAC630.12	SPAC630.13c	1882	1399	2578	3431	5.35342	5.21737	5.76055	5.65257	2220.88	2626.64	1815.12	0.691044	-0.533151	7.32001e-06	3.4966e-05	NA	NA	0	0	0	0	0	0	0	0	0	0	1
I	383580	385433	1854	1	SPAC1751.04	c("SPAC1751.01c", "SPAC1751.02c")	345	288	455	653	3.50102	3.5323	3.85343	3.85428	416.847	481.061	352.632	0.733031	-0.448054	0.00539923	0.0153547	NA	NA	0	0	0	0	0	0	0	0	0	0	1
I	386266	387856	1591	1	SPAC1751.03	NULL	4367	3518	7905	10695	7.06171	7.04163	7.87097	7.78671	6250.79	8118.37	4383.2	0.539911	-0.889206	1.94346e-16	2.56084e-15	NA	NA	0	0	0	0	0	0	0	0	0	0	1
I	388233	389229	997	1	SPAC31A2.02	SPNCRNA.643	619	526	1170	1984	4.97509	5.03203	5.84673	6.08827	993.918	1349.3	638.54	0.473239	-1.07936	1.49185e-10	1.26649e-09	NA	NA	0	0	0	0	0	0	0	0	0	0	1
I	389391	390520	1130	1	SPAC31A2.03	SPAC31A2.04c	720	544	687	984	4.7932	4.68062	4.67865	4.67664	712.79	725.628	699.952	0.964617	-0.0519726	0.737281	0.87766	NA	NA	0	0	0	0	0	0	0	0	0	0	1
I	397426	402487	5062	1	SPAC31A2.06	SPAC31A2.07c	1844	1413	1979	2769	3.91862	3.82635	3.97369	3.93792	1935.62	2066.13	1805.12	0.87367	-0.19484	0.106884	0.208793	NA	NA	0	0	0	0	0	0	0	0	0	0	1
I	402841	403862	1022	1	SPAC31A2.08	SPAC31A2.09c	505	462	767	1051	4.35845	4.52187	4.91453	4.84863	667.137	792.599	541.674	0.683414	-0.549168	9.82724e-05	0.000393352	NA	NA	0	0	0	0	0	0	0	0	0	0	1
I	405582	407710	2129	1	SPAC31A2.10	NULL	1352	946	1388	1803	4.92462	4.70125	4.91567	4.7727	1332.31	1397.89	1266.73	0.906177	-0.142135	0.335489	0.516972	NA	NA	0	0	0	0	0	0	0	0	0	0	1
I	411651	414448	2798	1	SPAC31A2.12	SPAC31A2.13c	1450	1002	1585	2199	4.42714	4.18579	4.50872	4.46072	1499.26	1647.89	1350.62	0.819608	-0.286994	0.0260723	0.0624072	NA	NA	0	0	0	0	0	0	0	0	0	0	1
I	414942	418504	3563	1	SPAC31A2.14	SPAC31A2.15c	2181	1766	3382	4295	4.6989	4.68621	5.28493	5.10935	2782.35	3369.92	2194.78	0.651284	-0.618641	8.07314e-08	5.0818e-07	NA	NA	0	0	0	0	0	0	0	0	0	0	1
I	419958	423991	4034	1	SPAC31A2.16	c("SPAC31A2.15c", "SPAC13C5.01c")	2626	1931	3019	4353	4.80414	4.65243	4.95849	4.96606	2859.39	3199.37	2519.4	0.787467	-0.344708	0.00264112	0.00804058	NA	NA	0	0	0	0	0	0	0	0	0	0	1
I	425631	427415	1785	1	SPAC13C5.02	NULL	1529	1148	2482	3509	5.21577	5.09411	5.86782	5.84702	2043.23	2604.61	1481.86	0.568936	-0.813661	6.20469e-12	5.98242e-11	NA	NA	0	0	0	0	0	0	0	0	0	0	1
I	427350	430121	2772	1	SPAC13C5.03	c("SPNCRNA.644", "SPNCRNA.645")	694	528	437	562	3.43273	3.33015	2.71858	2.56115	557.501	438.028	676.975	1.54551	0.62808	1.71957e-05	7.73388e-05	NA	NA	0	0	0	0	0	0	0	0	0	0	1
I	430056	431032	977	1	SPAC13C5.04	SPNCRNA.645	445	378	328	560	4.24093	4.29733	3.75397	4.00534	419.311	379.665	458.958	1.20885	0.273637	0.129979	0.245017	NA	NA	0	0	0	0	0	0	0	0	0	0	1
I	431220	431301	82	1	SPSNORNA.01	NULL	876	698	8092	11783	8.79272	8.75683	11.9534	11.9751	4746.18	8617.96	874.397	0.101462	-3.30099	4.31078e-167	3.47293e-165	NA	NA	0	0	0	0	0	0	0	0	0	0	1
I	434104	434843	740	1	SPNCRNA.05	SPAC13C5.06c	6	3	0	1	-1.42753	-2.13569	-16.6096	-4.57941	2.6171	0.368314	4.86589	13.2113	3.7237	0.129793	0.244782	NA	NA	0	0	0	0	0	0	0	0	0	0	1
I	435170	439980	4811	1	SPAC13C5.07	c("SPAC13C5.06c", "SPNCRNA.646", "SPNCRNA.647", "SPNCRNA.648")	41725	32215	11958	16145	8.55512	8.47376	6.70533	6.61808	26633.2	12268.4	40998	3.34175	1.7406	3.64181e-61	1.11806e-59	NA	NA	0	0	0	0	0	0	0	0	0	0	1
I	442201	445721	3521	1	SPAC23E2.01	NULL	3293	2462	3521	4723	5.2789	5.15114	5.32863	5.23198	3392.97	3601.05	3184.88	0.884433	-0.177176	0.137818	0.257529	NA	NA	0	0	0	0	0	0	0	0	0	0	1
I	446000	446071	72	1	SPATRNAVAL.01	NULL	12177	24577	14030	14121	12.7774	14.0824	12.9349	12.4239	17077	12618.4	21535.7	1.70669	0.771197	0.401524	0.589229	NA	NA	0	0	0	0	0	0	0	0	0	0	1
I	446491	450726	4236	1	SPAC23E2.02	SPNCRNA.649	1950	1217	1852	2399	4.33248	3.94415	4.21124	4.06422	1798.38	1862.71	1734.04	0.930923	-0.103266	0.701328	0.858245	NA	NA	0	0	0	0	0	0	0	0	0	0	1
I	453735	455859	2125	1	SPNCRNA.650	NULL	15	15	9	28	-1.77082	-1.47902	-2.55461	-1.43759	15.9829	15.071	16.8948	1.12102	0.164812	0.982918	1	NA	NA	0	0	0	0	0	0	0	0	0	0	1
I	456527	456645	119	1	SPRRNA.11	NULL	0	0	0	0	-16.6096	-16.6096	-16.6096	-16.6096	0	0	0	NA	NA	NA	NA	NA	NA	0	0	0	0	0	0	0	0	0	0	1
I	460793	461752	960	1	SPNCRNA.651	SPAC24H6.13	57	47	34	42	1.30149	1.315	0.509211	0.293705	45.669	33.4445	57.8936	1.73104	0.791635	0.047286	0.104746	NA	NA	0	0	0	0	0	0	0	0	0	0	1
I	461686	463599	1914	1	SPAC24H6.12c	NULL	1107	874	967	1350	4.58555	4.53641	4.34363	4.30464	1054.18	1008.46	1099.89	1.09066	0.125202	0.323321	0.503784	NA	NA	0	0	0	0	0	0	0	0	0	0	1
I	464120	468581	4462	1	SPAC24H6.11c	SPNCRNA.652	3756	2595	4087	6051	5.12699	4.88534	5.20198	5.24775	3943.83	4389.4	3498.25	0.796975	-0.327393	0.00371638	0.0109745	NA	NA	0	0	0	0	0	0	0	0	0	0	1
I	468664	469890	1227	1	SPAC24H6.10c	NULL	18713	14852	20034	27243	9.30632	9.26475	9.35787	9.28094	19633.7	20625.7	18641.8	0.903817	-0.145898	0.173156	0.30931	NA	NA	0	0	0	0	0	0	0	0	0	0	1
I	485606	487008	1403	1	SPNCRNA.653	SPAC24H6.03	164	127	88	78	2.27874	2.20169	1.33377	0.639378	118.317	75.2528	161.382	2.14453	1.10066	1.07831e-05	5.00932e-05	NA	NA	0	0	0	0	0	0	0	0	0	0	1
I	485703	486330	628	1	SPNCRNA.551	SPAC24H6.03	119	80	76	57	2.97568	2.69461	2.28194	1.34654	85.3049	61.174	109.436	1.78893	0.839095	0.0116521	0.0305398	NA	NA	0	0	0	0	0	0	0	0	0	0	1
I	488339	489482	1144	1	SPAC24H6.02c	c("SPAC24H6.03", "SPNCRNA.654")	160	102	175	292	2.59413	2.23644	2.67655	2.8948	171.85	200.068	143.632	0.717918	-0.478109	0.0333687	0.0770748	NA	NA	0	0	0	0	0	0	0	0	0	0	1
I	489871	492181	2311	1	SPAC24H6.01c	SPNCRNA.47	721	578	722	1099	3.85602	3.8289	3.81116	3.89692	754.189	786.488	721.891	0.917867	-0.123643	0.342159	0.524757	NA	NA	0	0	0	0	0	0	0	0	0	0	1
I	492335	497927	5593	1	SPAPB21F2.02	NULL	3421	2476	4890	7168	4.70948	4.53489	5.17804	5.20942	4241.25	5225.34	3257.16	0.623338	-0.681913	6.81425e-10	5.45686e-09	NA	NA	0	0	0	0	0	0	0	0	0	0	1
I	498111	499027	917	1	SPAPB21F2.03	SPAC227.01c	419	443	594	878	4.3115	4.68367	4.76816	4.81156	562.242	637.419	487.065	0.764122	-0.388126	0.027182	0.0646892	NA	NA	0	0	0	0	0	0	0	0	0	0	1
I	501407	504208	2802	1	SPNCRNA.655	c("SPAC227.19c", "SPAC227.02c", "SPAC227.03c")	221	188	299	418	1.71115	1.76965	2.10039	2.06339	270.068	312.032	228.105	0.73103	-0.451998	0.0154659	0.039492	NA	NA	0	0	0	0	0	0	0	0	0	0	1
I	504201	504900	700	1	SPNCRNA.656	SPAC227.03c	196	144	150	202	3.53898	3.38601	3.10624	3.01527	170.833	153.702	187.964	1.22291	0.290317	0.175192	0.31225	NA	NA	0	0	0	0	0	0	0	0	0	0	1
I	504835	505775	941	1	SPAC227.04	NULL	375	307	318	434	4.04818	4.05134	3.76346	3.69177	353.727	327.97	379.485	1.15707	0.210477	0.216672	0.370561	NA	NA	0	0	0	0	0	0	0	0	0	0	1
I	505902	506355	454	1	SPAC227.05	NULL	1363	1005	1715	2193	6.96151	6.81373	7.24607	7.08041	1511.9	1714.41	1309.39	0.763759	-0.388811	0.00237504	0.00729716	NA	NA	0	0	0	0	0	0	0	0	0	0	1
I	506520	507605	1086	1	SPAC227.06	SPAC227.07c	2719	1846	2571	3483	6.69954	6.43268	6.57193	6.48957	2576.99	2642.09	2511.89	0.950721	-0.0729066	0.647023	0.815162	NA	NA	0	0	0	0	0	0	0	0	0	0	1
I	510357	511293	937	1	SPNCRNA.657	SPAC227.08c	135	110	109	152	2.5804	2.57676	2.22491	2.18429	124.948	113.61	136.287	1.1996	0.262548	0.307176	0.484857	NA	NA	0	0	0	0	0	0	0	0	0	0	1
I	511350	513382	2033	1	SPAC227.09	SPAC227.08c	958	859	1074	1670	4.40285	4.5373	4.52089	4.63738	1099.74	1182.89	1016.58	0.859402	-0.218595	0.0611426	0.130458	NA	NA	0	0	0	0	0	0	0	0	0	0	1
I	513820	514921	1102	1	SPAC227.10	SPAC227.11c	847	732	1248	1778	5.23752	5.31881	5.74985	5.74012	1098.06	1314.66	881.467	0.67049	-0.576713	5.49611e-06	2.6841e-05	NA	NA	0	0	0	0	0	0	0	0	0	0	1
I	515661	517504	1844	1	SPAC227.12	c("SPAC227.11c", "SPAC227.13c")	351	338	506	735	3.03153	3.2689	3.51234	3.53059	462.683	538.225	387.14	0.71929	-0.475354	0.00171578	0.00543292	NA	NA	0	0	0	0	0	0	0	0	0	0	1
I	519257	520194	938	1	SPNCRNA.658	NULL	8	4	9	14	-1.49792	-2.20608	-1.37485	-1.25779	8.20121	9.91456	6.48786	0.654377	-0.611807	0.595723	0.767858	NA	NA	0	0	0	0	0	0	0	0	0	0	1
I	520174	522766	2593	1	SPAC227.14	NULL	1985	1590	1398	1860	5.09739	5.06909	4.54476	4.43633	1705.4	1424.17	1986.63	1.39494	0.480207	4.65474e-05	0.000196123	NA	NA	0	0	0	0	0	0	0	0	0	0	1
I	523097	526412	3316	1	SPAC227.15	NULL	2979	2281	4057	5441	5.22087	5.12752	5.6196	5.52269	3531.99	4148.87	2915.1	0.702625	-0.509174	6.69743e-06	3.22357e-05	NA	NA	0	0	0	0	0	0	0	0	0	0	1
I	526641	528541	1901	1	SPNCRNA.659	SPAC227.16c	31068	24980	50650	78698	9.40608	9.38324	10.0644	10.1798	43458.2	55763.5	31153	0.558663	-0.839949	1.55319e-16	2.05789e-15	NA	NA	0	0	0	0	0	0	0	0	0	0	1
I	526726	526803	78	1	SPSNORNA.02	NULL	667	466	1711	2636	8.47163	8.24608	9.78385	9.887	1249.97	1875.46	624.49	0.332981	-1.58649	1.53853e-34	3.42009e-33	NA	NA	0	0	0	0	0	0	0	0	0	0	1
I	526937	527036	100	1	SPSNORNA.03	NULL	2146	1877	2742	4743	9.79906	9.89766	10.1058	10.376	2722	3196.57	2247.43	0.703078	-0.508244	0.00193115	0.00603999	NA	NA	0	0	0	0	0	0	0	0	0	0	1
I	527191	527275	85	1	SPSNORNA.04	NULL	8680	7156	1948	2522	12.0496	12.0628	9.84702	9.69923	5387.04	1958.77	8815.32	4.50045	2.17007	4.20195e-83	1.643e-81	NA	NA	0	0	0	0	0	0	0	0	0	0	1
I	527387	527474	88	1	SPSNORNA.05	NULL	3440	3324	15369	21005	10.6642	10.9066	12.7769	12.7073	9831.59	15861.8	3801.39	0.239657	-2.06096	1.71488e-80	6.51438e-79	NA	NA	0	0	0	0	0	0	0	0	0	0	1
I	527624	527713	90	1	SPSNORNA.06	NULL	3127	3048	20349	34002	10.4942	10.7491	13.1494	13.3697	13376.9	23281.6	3472.19	0.149139	-2.74528	1.6945e-39	4.06005e-38	NA	NA	0	0	0	0	0	0	0	0	0	0	1
I	530261	531981	1721	1	SPAC227.18	c("SPAC227.17c", "SPAC2F7.02c")	9072	8450	9285	13324	7.77366	7.963	7.76028	7.76097	9820.99	9816.26	9825.71	1.00096	0.00138924	0.903314	0.990393	NA	NA	0	0	0	0	0	0	0	0	0	0	1
I	537888	540012	2125	1	SPAC2F7.04	SPAC2F7.05c	912	661	1380	1835	4.21615	4.04358	4.76685	4.6576	1137.17	1405.44	868.905	0.618244	-0.693753	1.20775e-07	7.4386e-07	NA	NA	0	0	0	0	0	0	0	0	0	0	1
I	541795	543483	1689	1	SPNCRNA.552	SPAC2F7.06c	564	379	811	926	3.79308	3.5114	4.27023	3.94118	644.196	769.822	518.57	0.673623	-0.569987	0.0168772	0.0426783	NA	NA	0	0	0	0	0	0	0	0	0	0	1
I	541797	544030	2234	1	SPNCRNA.660	SPAC2F7.06c	653	445	927	1071	3.60101	3.33955	4.05964	3.7476	744.431	884.555	604.307	0.683176	-0.549671	0.0138707	0.0357304	NA	NA	0	0	0	0	0	0	0	0	0	0	1
I	548568	549658	1091	1	SPNCRNA.661	SPAC2F7.09c	144	173	153	189	2.45398	3.01049	2.49458	2.27908	165.49	150.5	180.48	1.1992	0.262075	0.505299	0.688705	NA	NA	0	0	0	0	0	0	0	0	0	0	1
I	550630	553595	2966	1	SPAC2F7.10	SPAC2F7.09c	1433	1078	1779	2446	4.32601	4.20714	4.59118	4.53017	1615.78	1841.43	1390.13	0.754919	-0.405606	0.000997077	0.00331365	NA	NA	0	0	0	0	0	0	0	0	0	0	1
I	555277	559051	3775	1	SPAC2F7.11	SPAC2F7.13c	2071	1408	2846	4180	4.50934	4.24447	4.92109	4.95529	2479.33	3044.19	1914.47	0.628894	-0.669111	9.52897e-09	6.80462e-08	NA	NA	0	0	0	0	0	0	0	0	0	0	1
I	555300	556109	810	1	SPNCRNA.154	NULL	240	116	215	375	3.6206	2.8635	3.41504	3.69724	221.949	251.785	192.113	0.763004	-0.390237	0.291596	0.46646	NA	NA	0	0	0	0	0	0	0	0	0	0	1
I	563698	565073	1376	1	SPAC2F7.15	SPAC2F7.16c	1002	769	1206	1650	5.01323	4.92322	5.23373	5.1656	1113.47	1245.31	981.627	0.788257	-0.343261	0.00875983	0.0236458	NA	NA	0	0	0	0	0	0	0	0	0	0	1
I	569550	571876	2327	1	SPAC2F7.17	SPAC13A11.01c	730	632	1240	1801	3.95946	4.0433	4.67698	4.69507	1039.66	1318.9	760.409	0.576546	-0.794492	7.00936e-10	5.60936e-09	NA	NA	0	0	0	0	0	0	0	0	0	0	1
I	577199	578150	952	1	SPNCRNA.155	NULL	3	6	3	5	-2.93426	-1.64251	-2.98111	-2.76453	4.34932	3.42762	5.27101	1.5378	0.62087	0.787328	0.916356	NA	NA	0	0	0	0	0	0	0	0	0	0	1
I	578392	579948	1557	1	SPAC13A11.03	SPAC13A11.04c	2060	1648	2198	2879	5.8692	5.83909	5.91589	5.7849	2141.4	2222.43	2060.38	0.927088	-0.109222	0.387029	0.573922	NA	NA	0	0	0	0	0	0	0	0	0	0	1
I	582273	584402	2130	1	SPAC13A11.05	NULL	3158	2607	2634	3587	5.94364	5.95884	5.63503	5.56019	2961.56	2713.7	3209.42	1.18267	0.242053	0.030333	0.0710889	NA	NA	0	0	0	0	0	0	0	0	0	0	1
I	585355	587495	2141	1	SPAC13A11.06	c("SPNCRNA.662", "SPNCRNA.553")	250	157	225	360	2.2772	1.89785	2.07834	2.23605	237.237	251.547	222.927	0.886225	-0.174255	0.404767	0.592973	NA	NA	0	0	0	0	0	0	0	0	0	0	1
I	588543	590751	2209	1	SPAC3H8.02	NULL	3307	2321	4588	6540	5.95761	5.73865	6.3831	6.37416	3968.64	4834.38	3102.9	0.64184	-0.639715	1.13861e-08	8.04939e-08	NA	NA	0	0	0	0	0	0	0	0	0	0	1
I	590691	592152	1462	1	SPAC3H8.03	SPNCRNA.663	321	276	299	433	3.36764	3.44155	3.21836	3.23222	325.363	317.557	333.169	1.04916	0.069239	0.742998	0.882528	NA	NA	0	0	0	0	0	0	0	0	0	0	1
I	592226	593906	1681	1	SPAC3H8.04	c("SPNCRNA.663", "SPAC3H8.05c")	1473	1182	1088	1674	5.18492	5.15921	4.70099	4.80225	1333.66	1191.77	1475.54	1.23812	0.308146	0.0161669	0.0410464	NA	NA	0	0	0	0	0	0	0	0	0	0	1
I	597723	598290	568	1	SPNCRNA.156	c("SPNCRNA.664", "SPNCRNA.665")	3	5	1	5	-2.18923	-1.16049	-3.82091	-2.01949	3.50529	2.37025	4.64033	1.95773	0.969185	0.696484	0.85463	NA	NA	0	0	0	0	0	0	0	0	0	0	1
I	598473	600805	2333	1	SPAC3H8.06	SPNCRNA.665	2242	1635	2598	3693	5.31808	5.1544	5.48384	5.47087	2438.05	2733.71	2142.39	0.783695	-0.351636	0.002704	0.0082091	NA	NA	0	0	0	0	0	0	0	0	0	0	1
I	604128	606113	1986	1	SPNCRNA.666	SPAC3H8.09c	444	331	482	684	3.21425	3.08234	3.28587	3.27047	467.787	506.753	428.82	0.846212	-0.24091	0.13648	0.255355	NA	NA	0	0	0	0	0	0	0	0	0	0	1
I	608893	610703	1811	1	SPAC3H8.10	NULL	5646	4260	7344	10537	7.28391	7.16935	7.61639	7.61685	6624.34	7763.59	5485.09	0.706515	-0.501207	3.1921e-06	1.61203e-05	NA	NA	0	0	0	0	0	0	0	0	0	0	1
I	610842	613338	2497	1	SPAC1F3.01	NULL	3388	2689	5791	8454	5.84963	5.80808	6.57615	6.60161	4775.24	6175.34	3375.13	0.54655	-0.871574	1.1441e-15	1.44872e-14	NA	NA	0	0	0	0	0	0	0	0	0	0	1
I	617816	622703	4888	1	SPAC1F3.03	SPAC1F3.04c	2550	1983	2454	3321	4.47806	4.40706	4.37584	4.29196	2517.55	2520.56	2514.53	0.997605	-0.00345991	0.972357	1	NA	NA	0	0	0	0	0	0	0	0	0	0	1
I	623091	625407	2317	1	SPAC1F3.05	SPAC1F3.06c	1885	1489	3122	4026	5.26502	5.21661	5.94607	5.79258	2503.38	3133.39	1873.37	0.597873	-0.742088	1.87721e-10	1.58133e-09	NA	NA	0	0	0	0	0	0	0	0	0	0	1
I	632595	633291	697	1	SPNCRNA.668	c("SPAC1F3.07c", "SPAC1F3.08c")	164	164	192	244	3.28802	3.57984	3.46858	3.29399	188.047	191.376	184.717	0.965203	-0.0510955	0.793328	0.920367	NA	NA	0	0	0	0	0	0	0	0	0	0	1
I	633652	636959	3308	1	SPAC1F3.09	c("SPNCRNA.669", "SPAC1F3.10c")	2583	1901	2773	4128	5.17358	5.02311	5.22913	5.28276	2732.81	2986.44	2479.17	0.83014	-0.268573	0.0185696	0.0463815	NA	NA	0	0	0	0	0	0	0	0	0	0	1
I	639405	641280	1876	1	SPAC1D4.01	c("SPAC1F3.10c", "SPAC1D4.02c")	655	618	1071	1483	3.85739	4.06532	4.51993	4.46913	913.419	1112.43	714.406	0.642202	-0.6389	1.05853e-06	5.72627e-06	NA	NA	0	0	0	0	0	0	0	0	0	0	1
I	644667	646547	1881	1	SPAC1D4.04	c("SPNCRNA.670", "SPAC1D4.05c")	6625	5362	9164	13656	7.25701	7.24368	7.67821	7.73334	8269.95	9874.57	6665.34	0.675	-0.56704	5.94785e-08	3.82216e-07	NA	NA	0	0	0	0	0	0	0	0	0	0	1
I	650465	652224	1760	1	SPAC1D4.08	NULL	4190	3284	3251	4524	6.87586	6.81618	6.46294	6.41929	3766.45	3385.01	4147.89	1.22537	0.29322	0.00701213	0.0193949	NA	NA	0	0	0	0	0	0	0	0	0	0	1
I	653449	656657	3209	1	SPAC1D4.10	SPAC1D4.11c	881	443	854	1283	3.52731	2.82729	3.43555	3.5024	820.048	924.044	716.052	0.774911	-0.367897	0.246563	0.409143	NA	NA	0	0	0	0	0	0	0	0	0	0	1
I	660084	664108	4025	1	SPNCRNA.671	c("SPAC1D4.11c", "SPNCRNA.672", "SPNCRNA.79")	441	341	537	751	2.18535	2.10616	2.42264	2.38616	497.074	560.508	433.64	0.773656	-0.370236	0.0180705	0.0453141	NA	NA	0	0	0	0	0	0	0	0	0	0	1
I	664310	667647	3338	1	SPAC1D4.12	SPNCRNA.673	1668	1324	2193	3239	4.37462	4.33322	4.72255	4.76483	2007.06	2352.38	1661.75	0.706414	-0.501413	1.60927e-05	7.28417e-05	NA	NA	0	0	0	0	0	0	0	0	0	0	1
I	667815	669742	1928	1	SPAC1D4.13	SPNCRNA.674	464	252	463	691	3.32058	2.73169	3.27061	3.32792	444.098	499.286	388.909	0.778931	-0.360433	0.166582	0.299843	NA	NA	0	0	0	0	0	0	0	0	0	0	1
I	670203	675444	5242	1	SPAC1D4.14	SPAC22F3.13	3690	2876	6260	8797	4.88421	4.81646	5.59989	5.57038	5096.19	6549.63	3642.76	0.556178	-0.846382	8.51827e-15	1.01846e-13	NA	NA	0	0	0	0	0	0	0	0	0	0	1
I	678585	679442	858	1	SPNCRNA.158	SPNCRNA.675	0	3	3	11	-16.6096	-2.49249	-2.83114	-1.4771	3.76477	5.63751	1.89204	0.335617	-1.57511	0.272607	0.443291	NA	NA	0	0	0	0	0	0	0	0	0	0	1
I	679062	681890	2829	1	SPAC22F3.12c	SPNCRNA.675	252	215	322	364	1.88669	1.94942	2.19347	1.84999	282.401	304.303	260.498	0.856049	-0.224236	0.303183	0.480925	NA	NA	0	0	0	0	0	0	0	0	0	0	1
I	682835	683660	826	1	SPAC22F3.11c	NULL	360	326	453	621	4.3977	4.54639	4.68235	4.61707	426.125	468.217	384.033	0.820202	-0.285948	0.0694479	0.145388	NA	NA	0	0	0	0	0	0	0	0	0	0	1
I	683990	686347	2358	1	SPAC22F3.10c	NULL	9514	7184	11095	14764	7.55035	7.4369	7.72528	7.61709	10274.9	11303.5	9246.35	0.818004	-0.289821	0.0081504	0.0221854	NA	NA	0	0	0	0	0	0	0	0	0	0	1
I	686543	689179	2637	1	SPAC22F3.09c	NULL	677	461	624	858	3.50645	3.24388	3.34199	3.28105	636.103	645.913	626.293	0.969625	-0.0445012	0.863243	0.966639	NA	NA	0	0	0	0	0	0	0	0	0	0	1
I	689345	691122	1778	1	SPAC22F3.08c	NULL	1061	898	1785	2688	4.63065	4.68183	5.3343	5.40454	1512.98	1933.73	1092.23	0.564829	-0.824114	8.49649e-12	8.10746e-11	NA	NA	0	0	0	0	0	0	0	0	0	0	1
I	691472	692077	606	1	SPAC22F3.07c	NULL	1264	1074	1401	1957	6.69058	6.74739	6.79219	6.75401	1382.66	1461.48	1303.84	0.892139	-0.164659	0.170562	0.30554	NA	NA	0	0	0	0	0	0	0	0	0	0	1
I	692567	693061	495	1	SPAC22F3.15	NULL	176	134	223	313	4.29576	4.19423	4.59037	4.55913	202.462	233.179	171.744	0.736533	-0.441177	0.0379193	0.086209	NA	NA	0	0	0	0	0	0	0	0	0	0	1
I	693514	697130	3617	1	SPAC22F3.06c	NULL	11808	9538	11790	16700	7.08238	7.06619	7.03333	7.01525	12126	12384	11868	0.958328	-0.0614089	0.548929	0.731535	NA	NA	0	0	0	0	0	0	0	0	0	0	1
I	697191	703040	5850	1	SPAC22F3.05c	c("SPNCRNA.676", "SPAC22F3.04")	1529	1054	2009	3025	3.50807	3.26317	3.8551	3.9252	1799.43	2176.28	1422.57	0.653673	-0.613359	3.47332e-07	2.00837e-06	NA	NA	0	0	0	0	0	0	0	0	0	0	1
I	703669	707990	4322	1	SPAC22F3.03c	c("SPAC22F3.02", "SPAC1296.01c")	532	428	709	976	2.57046	2.54846	2.93796	2.87869	633.962	734.312	533.613	0.726684	-0.4606	0.00157906	0.00504793	NA	NA	0	0	0	0	0	0	0	0	0	0	1
I	711238	712354	1117	1	SPAC1296.02	SPAC1296.03c	3769	2912	3741	5722	7.6818	7.60145	7.62419	7.71692	3894.96	4085.3	3704.62	0.906815	-0.141119	0.182171	0.321869	NA	NA	0	0	0	0	0	0	0	0	0	0	1
I	715377	716978	1602	1	SPAC1296.04	SPAC1296.05c	512	445	567	804	4.13828	4.22775	4.23862	4.22211	565.155	595.889	534.421	0.896848	-0.157065	0.269363	0.439744	NA	NA	0	0	0	0	0	0	0	0	0	0	1
I	719380	721549	2170	1	SPAC1296.06	SPAPJ696.01c	594	505	888	1403	3.65243	3.71007	4.18567	4.32519	799.561	986.217	612.905	0.621471	-0.686242	3.0765e-07	1.79361e-06	NA	NA	0	0	0	0	0	0	0	0	0	0	1
I	724145	725946	1802	1	SPAPJ696.02	SPAC22G7.01c	1787	1642	3019	4526	5.47924	5.64896	6.18891	6.25271	2592.19	3263.09	1921.29	0.588795	-0.764164	7.32089e-12	7.03602e-11	NA	NA	0	0	0	0	0	0	0	0	0	0	1
I	728335	731867	3533	1	SPAC22G7.02	SPNCRNA.677	1901	1397	2570	3700	4.61563	4.46302	5.00378	5.00918	2272.38	2721.48	1823.28	0.669957	-0.57786	7.56321e-07	4.17804e-06	NA	NA	0	0	0	0	0	0	0	0	0	0	1
I	731933	732759	827	1	SPAC22G7.03	SPNCRNA.677	63	75	91	129	1.66103	2.20438	2.14468	2.12775	87.0747	95.6228	78.5265	0.82121	-0.284176	0.288497	0.462243	NA	NA	0	0	0	0	0	0	0	0	0	0	1
I	732826	736603	3778	1	SPAC22G7.04	SPNCRNA.678	2175	1587	3449	4670	4.70615	4.54325	5.32445	5.24133	2811.19	3543.46	2078.91	0.586689	-0.769331	2.65522e-11	2.40553e-10	NA	NA	0	0	0	0	0	0	0	0	0	0	1
I	736722	738782	2061	1	SPAC22G7.05	SPNCRNA.678	2432	2001	5312	7363	5.70604	5.71643	6.7863	6.73697	3993.83	5520.27	2467.39	0.44697	-1.16175	1.32205e-25	2.41551e-24	NA	NA	0	0	0	0	0	0	0	0	0	0	1
I	749523	751846	2324	1	SPAC22G7.08	SPAC22G7.09c	688	436	712	1036	3.69388	3.32761	3.69649	3.7172	686.988	757.997	615.978	0.81264	-0.299313	0.0481518	0.106331	NA	NA	0	0	0	0	0	0	0	0	0	0	1
I	753624	755676	2053	1	SPAC22G7.10	SPAC22G7.11c	1546	1211	2956	3425	5.03244	4.97191	5.92069	5.61278	2177.14	2824.27	1530.02	0.541739	-0.88433	2.71752e-05	0.000118235	NA	NA	0	0	0	0	0	0	0	0	0	0	1
I	762720	764810	2091	1	SPNCRNA.679	NULL	122	113	289	299	1.27625	1.45751	2.47358	2.00229	197.326	262.916	131.735	0.501055	-0.99696	0.0034719	0.0103058	NA	NA	0	0	0	0	0	0	0	0	0	0	1
I	765526	767503	1978	1	SPNCRNA.680	NULL	126	98	126	144	1.40294	1.33219	1.35609	1.02837	121.955	119.652	124.258	1.0385	0.0544947	0.763953	0.899796	NA	NA	0	0	0	0	0	0	0	0	0	0	1
I	767446	770246	2801	1	SPAC4G8.04	NULL	2574	2026	2371	3300	5.28637	5.23281	5.121	5.07761	2511.24	2468.95	2553.54	1.03426	0.0486025	0.650153	0.81774	NA	NA	0	0	0	0	0	0	0	0	0	0	1
I	770502	772666	2165	1	SPAC4G8.05	SPAC4G8.06c	1573	1297	1693	2522	4.91464	4.92811	4.97384	5.02847	1710.79	1823.95	1597.64	0.875921	-0.191128	0.0942638	0.188026	NA	NA	0	0	0	0	0	0	0	0	0	0	1
I	776184	777243	1060	1	SPNCRNA.681	NULL	489	347	579	776	4.25933	4.05624	4.4562	4.35833	526.568	591.92	461.215	0.779184	-0.359963	0.0244132	0.0588703	NA	NA	0	0	0	0	0	0	0	0	0	0	1
I	776272	777066	795	1	SPNCRNA.159	NULL	373	261	482	610	4.51764	4.29433	4.84064	4.66005	414.49	479.498	349.482	0.72885	-0.456306	0.00832317	0.0225993	NA	NA	0	0	0	0	0	0	0	0	0	0	1
I	777177	778498	1322	1	SPAC4G8.08	SPNCRNA.682	607	475	676	1011	4.5008	4.43884	4.60927	4.6696	665.092	729.757	600.428	0.822778	-0.281424	0.0458797	0.102046	NA	NA	0	0	0	0	0	0	0	0	0	0	1
I	778431	781324	2894	1	SPAC4G8.09	SPNCRNA.683	1860	1237	1989	2956	4.73772	4.44108	4.78761	4.83885	1921.17	2140.29	1702.05	0.79524	-0.330537	0.00677416	0.018806	NA	NA	0	0	0	0	0	0	0	0	0	0	1
I	781348	783419	2072	1	SPAC4G8.10	SPAC4G8.11c	415	322	358	530	3.05565	2.98141	2.79564	2.84131	396.623	384.476	408.771	1.06319	0.0883989	0.607876	0.779921	NA	NA	0	0	0	0	0	0	0	0	0	0	1
I	790209	790793	585	1	SPNCRNA.684	c("SPAC4G8.13c", "SPAC16C9.01c")	27	30	28	63	0.938087	1.3819	0.943698	1.59326	35.1549	38.007	32.3027	0.849917	-0.234607	0.506761	0.688705	NA	NA	0	0	0	0	0	0	0	0	0	0	1
I	790798	791645	848	1	SPNCRNA.685	SPAC16C9.01c	85	89	168	246	2.05696	2.41511	2.99303	3.02286	138.842	179.424	98.2601	0.547641	-0.868698	0.000269317	0.00099842	NA	NA	0	0	0	0	0	0	0	0	0	0	1
I	792378	794001	1624	1	SPNCRNA.686	SPAC16C9.02c	19	9	15	11	-1.04189	-1.82806	-1.42978	-2.39756	13.5375	11.9817	15.0933	1.25969	0.333074	0.570489	0.750757	NA	NA	0	0	0	0	0	0	0	0	0	0	1
I	794866	796821	1956	1	SPAC16C9.03	NULL	5254	3927	7498	10434	6.80099	6.67282	7.26723	7.22358	6443.93	7807.07	5080.79	0.650793	-0.61973	1.09984e-08	7.78447e-08	NA	NA	0	0	0	0	0	0	0	0	0	0	1
I	799341	800981	1641	1	SPAC16C9.05	SPNCRNA.687	1019	874	963	1360	4.68806	4.75843	4.55966	4.5373	1033.15	1010.03	1056.27	1.04578	0.0645847	0.657945	0.824939	NA	NA	0	0	0	0	0	0	0	0	0	0	1
I	804574	807722	3149	1	SPAC16C9.07	NULL	2222	1584	2624	3777	4.87245	4.67598	5.0655	5.07061	2439.35	2778.39	2100.31	0.755946	-0.403645	0.000568118	0.00198478	NA	NA	0	0	0	0	0	0	0	0	0	0	1
I	807894	812194	4301	1	SPAC2G11.02	SPAC2G11.03c	2036	1430	3416	4960	4.31614	4.09823	5.01585	5.03352	2771.91	3632.83	1911	0.526037	-0.926764	7.95513e-16	1.01481e-14	NA	NA	0	0	0	0	0	0	0	0	0	0	1
I	814218	815490	1273	1	SPAC2G11.04	c("SPAC2G11.03c", "SPAC2G11.05c")	448	349	532	700	3.86882	3.80037	4.0699	3.94546	490.618	539.08	442.155	0.820203	-0.285948	0.0765292	0.157331	NA	NA	0	0	0	0	0	0	0	0	0	0	1
I	817996	819739	1744	1	SPAC2G11.06	SPNCRNA.688	1890	1510	2331	3203	5.70028	5.66825	5.95599	5.8941	2150.58	2412.07	1889.09	0.783181	-0.352583	0.00262638	0.00799773	NA	NA	0	0	0	0	0	0	0	0	0	0	1
I	823493	826399	2907	1	SPAC2G11.09	SPAC2G11.10c	3523	2455	3993	6186	5.70789	5.47863	5.84171	5.95288	3841.95	4389.43	3294.47	0.750546	-0.413988	0.000188389	0.00071632	NA	NA	0	0	0	0	0	0	0	0	0	0	1
I	826579	828205	1627	1	SPNCRNA.689	SPAC2G11.10c	52	55	73	71	0.407937	0.780668	0.850463	0.290026	62.6026	64.7443	60.4608	0.93384	-0.0987534	0.846663	0.95565	NA	NA	0	0	0	0	0	0	0	0	0	0	1
I	829234	831663	2430	1	SPNCRNA.690	SPAC2G11.11c	265	208	110	133	2.1786	2.121	0.863256	0.616817	184.834	107.141	262.527	2.45029	1.29295	2.46964e-09	1.86685e-08	NA	NA	0	0	0	0	0	0	0	0	0	0	1
I	831918	836094	4177	1	SPAC2G11.12	NULL	1870	1577	2444	3521	4.21606	4.26201	4.55541	4.56178	2255.19	2588.94	1921.43	0.74217	-0.430178	0.000153876	0.000594122	NA	NA	0	0	0	0	0	0	0	0	0	0	1
I	836206	838256	2051	1	SPAC2G11.13	SPNCRNA.691	478	345	510	681	3.27424	3.09564	3.32087	3.21767	487.476	520.451	454.502	0.873284	-0.195478	0.250642	0.414423	NA	NA	0	0	0	0	0	0	0	0	0	0	1
I	838228	841562	3335	1	SPAC2G11.14	SPAC2G11.15c	2898	2176	2836	3720	5.22932	5.10775	5.15126	5.02234	2839.11	2869.48	2808.73	0.97883	-0.0308703	0.887004	0.982432	NA	NA	0	0	0	0	0	0	0	0	0	0	1
I	843197	844165	969	1	SPAC521.02	SPNCRNA.692	2540	1922	2729	3628	6.76574	6.65534	6.82243	6.71287	2625.06	2779.02	2471.1	0.889196	-0.169426	0.166654	0.299927	NA	NA	0	0	0	0	0	0	0	0	0	0	1
I	844948	846142	1195	1	SPAC521.03	SPAC521.04c	5179	4281	3369	5606	7.49115	7.50824	6.82394	7.03823	4556.39	3845.91	5266.87	1.36947	0.453622	7.30644e-05	0.00029822	NA	NA	0	0	0	0	0	0	0	0	0	0	1
I	848371	849443	1073	1	SPNCRNA.693	SPAC521.04c	4	4	2	0	-2.69186	-2.40006	-3.73861	-16.6096	2.78133	1.05737	4.50529	4.26084	2.09114	0.267383	0.437225	NA	NA	0	0	0	0	0	0	0	0	0	0	1
I	849421	850259	839	1	SPAC521.05	SPAC521.04c	10821	9200	13981	21588	9.0645	9.12219	9.38728	9.49368	13254.2	15342.7	11165.6	0.727746	-0.458492	5.53016e-06	2.69744e-05	NA	NA	0	0	0	0	0	0	0	0	0	0	1
I	850591	854385	3795	1	SPAC23G3.01	NULL	8864	7481	11891	17067	6.61386	6.66095	6.99085	6.99182	10842.1	12572.6	9111.49	0.72471	-0.464525	6.96365e-06	3.33594e-05	NA	NA	0	0	0	0	0	0	0	0	0	0	1
I	870740	872773	2034	1	SPAC23G3.03	SPNCRNA.694	1367	1028	1123	1657	4.85417	4.73481	4.52366	4.56452	1264.95	1204.01	1325.88	1.10122	0.139106	0.262837	0.431117	NA	NA	0	0	0	0	0	0	0	0	0	0	1
I	872883	874248	1366	1	SPAC23G3.04	c("SPNCRNA.694", "SPAC23G3.05c")	393	351	672	1015	3.57813	3.70689	4.30521	4.37979	572.636	729.115	416.156	0.570769	-0.809022	3.42743e-08	2.26309e-07	NA	NA	0	0	0	0	0	0	0	0	0	0	1
I	876862	878930	2069	1	SPAC23G3.06	NULL	15111	12894	21493	29230	8.32216	8.38507	8.78357	8.70679	18875.2	22128.8	15621.6	0.70594	-0.502382	1.13459e-06	6.08564e-06	NA	NA	0	0	0	0	0	0	0	0	0	0	1
I	884365	885989	1625	1	SPAC23G3.09	SPAC23G3.10c	665	729	1310	1526	4.08647	4.51085	5.01776	4.71758	1022	1254.62	789.368	0.629167	-0.668486	0.0112252	0.0295629	NA	NA	0	0	0	0	0	0	0	0	0	0	1
I	885944	889096	3153	1	SPAC23G3.11	c("SPAC23G3.10c", "SPAC23G3.12c")	3075	2538	2703	3926	5.38916	5.40407	5.15627	5.17441	2999.9	2875.04	3124.77	1.08686	0.120168	0.309713	0.487363	NA	NA	0	0	0	0	0	0	0	0	0	0	1
I	893996	896547	2552	1	SPAC22H12.02	SPAC22H12.01c	1654	1424	2557	3857	4.93666	5.01246	5.51829	5.59096	2245.16	2772.43	1717.88	0.619629	-0.690524	1.24333e-09	9.71047e-09	NA	NA	0	0	0	0	0	0	0	0	0	0	1
I	896668	897900	1233	1	SPAC22H12.03	NULL	260	205	250	374	3.28411	3.23304	3.18067	3.24142	264.039	269.921	258.156	0.956416	-0.0642902	0.72286	0.866162	NA	NA	0	0	0	0	0	0	0	0	0	0	1
I	903042	903861	820	1	SPAC1687.01	NULL	634	655	839	1344	5.40305	5.74188	5.76039	5.91981	832.957	938.581	727.333	0.774928	-0.367865	0.0396543	0.0897933	NA	NA	0	0	0	0	0	0	0	0	0	0	1
I	904026	906347	2322	1	SPAC1687.02	SPAC1687.03c	905	704	1138	1484	4.04815	3.97762	4.3318	4.19443	1020.39	1148.22	892.555	0.777337	-0.363388	0.0069259	0.0191873	NA	NA	0	0	0	0	0	0	0	0	0	0	1
I	906778	908799	2022	1	SPAC1687.04	SPNCRNA.695	694	487	888	1468	3.86445	3.64525	4.17322	4.37808	830.637	1010.16	651.117	0.64457	-0.633591	7.52411e-06	3.57984e-05	NA	NA	0	0	0	0	0	0	0	0	0	0	1
I	908736	911854	3119	1	SPAC1687.05	SPAC1687.06c	3053	2301	3012	4120	5.36888	5.25273	5.30252	5.23408	3037.12	3109.85	2964.39	0.953225	-0.0691109	0.595519	0.767842	NA	NA	0	0	0	0	0	0	0	0	0	0	1
I	913657	914031	375	1	SPAC1687.07	NULL	289	264	235	325	4.99966	5.16095	4.6544	4.60182	276.842	243.943	309.74	1.26972	0.344514	0.0730468	0.151547	NA	NA	0	0	0	0	0	0	0	0	0	0	1
I	914328	914618	291	1	SPAC1687.08	NULL	104	152	101	140	3.89105	4.73035	3.80197	3.75267	126.186	104.961	147.41	1.40443	0.489981	0.412344	0.5999	NA	NA	0	0	0	0	0	0	0	0	0	0	1
I	914940	919775	4836	1	SPAC1687.09	NULL	3334	2461	4033	5807	4.83892	4.69273	5.06667	5.07225	3737.78	4270.99	3204.58	0.750313	-0.414436	0.000209822	0.000791049	NA	NA	0	0	0	0	0	0	0	0	0	0	1
I	919726	922098	2373	1	SPAC1687.10	SPNCRNA.696	611	558	748	987	3.44998	3.61089	3.69499	3.57464	706.87	758.982	654.757	0.862677	-0.213107	0.122673	0.233952	NA	NA	0	0	0	0	0	0	0	0	0	0	1
I	922271	925133	2863	1	SPAC1687.11	SPAC1687.12c	5476	4815	12458	16266	6.43629	6.54252	7.57531	7.43974	9164.11	12577.4	5750.86	0.457239	-1.12898	9.30887e-25	1.66038e-23	NA	NA	0	0	0	0	0	0	0	0	0	0	1
I	929843	932197	2355	1	SPAC1687.15	NULL	2510	2029	2878	3795	5.83449	5.81938	5.98501	5.86368	2721.51	2919.31	2523.71	0.86449	-0.210079	0.072578	0.150809	NA	NA	0	0	0	0	0	0	0	0	0	0	1
I	934056	934503	448	1	SPNCRNA.160	NULL	4	3	4	6	-1.43183	-1.55505	-1.47869	-1.41409	4.09962	4.32462	3.87461	0.895941	-0.158524	1	1	NA	NA	0	0	0	0	0	0	0	0	0	0	1
I	938390	939912	1523	1	SPNCRNA.697	c("SPAC1687.19c", "SPAC1687.20c")	116	117	71	99	1.66077	1.96497	0.905683	0.86493	102.642	73.9997	131.284	1.77412	0.8271	0.00375902	0.0110759	NA	NA	0	0	0	0	0	0	0	0	0	0	1
I	941942	943335	1394	1	SPAC1687.21	c("SPAC1687.20c", "SPAC1687.22c")	2434	1844	3259	4795	6.85641	6.74774	7.23066	7.2674	2929.21	3489.05	2369.37	0.679087	-0.558332	7.47048e-07	4.12871e-06	NA	NA	0	0	0	0	0	0	0	0	0	0	1
I	948715	949365	651	1	SPNCRNA.699	SPAC222.03c	161	138	127	180	3.35989	3.42931	2.9708	2.95361	150.136	133.44	166.832	1.25025	0.322212	0.182904	0.322827	NA	NA	0	0	0	0	0	0	0	0	0	0	1
I	949646	950047	402	1	SPAC222.19	NULL	117	74	102	169	3.77824	3.40915	3.53345	3.74154	110.416	116.171	104.66	0.900918	-0.150533	0.596074	0.768145	NA	NA	0	0	0	0	0	0	0	0	0	0	1
I	951028	952560	1533	1	SPNCRNA.700	SPAC222.05c	116	85	135	179	1.65133	1.49455	1.82331	1.70994	124.202	137.301	111.102	0.80919	-0.30545	0.261268	0.429154	NA	NA	0	0	0	0	0	0	0	0	0	0	1
I	953095	954325	1231	1	SPAC222.06	SPAC222.07c	1245	1007	2568	3210	5.45529	5.44102	6.45293	6.2545	1896.06	2539.95	1252.17	0.49299	-1.02037	3.07951e-13	3.31538e-12	NA	NA	0	0	0	0	0	0	0	0	0	0	1
I	957183	957254	72	1	SPATRNAGLU.02	NULL	1	0	0	0	-0.794415	-16.6096	-16.6096	-16.6096	0.247821	0	0.495642	Inf	Inf	0.967065	1	NA	NA	0	0	0	0	0	0	0	0	0	0	1
I	959867	962227	2361	1	SPAC222.09	NULL	4923	3744	5306	7631	6.55666	6.45352	6.61789	6.62178	5208.56	5615.81	4801.31	0.854964	-0.226064	0.0385894	0.0876661	NA	NA	0	0	0	0	0	0	0	0	0	0	1
I	966164	967591	1428	1	SPAC222.11	SPAC222.17	2237	1822	4668	6900	6.02305	6.01883	7.03744	7.08087	3633.56	5009.27	2257.85	0.450735	-1.14965	4.95872e-25	8.9242e-24	NA	NA	0	0	0	0	0	0	0	0	0	0	1
I	972677	973994	1318	1	SPNCRNA.701	c("SPAC222.13c", "SPAC222.14c")	55	39	51	87	0.792718	0.588576	0.636929	0.887083	55.4315	59.0063	51.8568	0.878836	-0.186333	0.61028	0.782169	NA	NA	0	0	0	0	0	0	0	0	0	0	1
I	977709	978637	929	1	SPAC222.15	NULL	17	20	16	40	0.116447	0.642722	-0.0178705	0.783689	22.1155	23.1915	21.0395	0.907208	-0.140495	0.710594	0.862833	NA	NA	0	0	0	0	0	0	0	0	0	0	1
I	978722	979643	922	1	SPAC222.18	SPAC222.16c	921	756	778	1142	5.60416	5.61116	5.31387	5.34723	882.606	831.932	933.281	1.12182	0.165846	0.235842	0.39592	NA	NA	0	0	0	0	0	0	0	0	0	0	1
I	988076	989866	1791	1	SPAC821.05	SPSNRNA.03	7328	5741	8548	11788	7.59539	7.53508	7.7707	7.71399	8056.84	8860.89	7252.8	0.818519	-0.288913	0.00721133	0.0198908	NA	NA	0	0	0	0	0	0	0	0	0	0	1
I	990192	991889	1698	1	SPAC821.06	c("SPNCRNA.702", "SPAC821.07c")	1407	1185	1460	2020	5.36425	5.40833	5.37074	5.31876	1480.3	1515.87	1444.72	0.953063	-0.0693558	0.557406	0.739185	NA	NA	0	0	0	0	0	0	0	0	0	0	1
I	993887	995063	1177	1	SPNCRNA.703	c("SPAC821.07c", "SPAC821.08c")	263	200	465	619	3.21351	3.11026	3.98882	3.88116	365.157	473.825	256.49	0.541318	-0.885452	3.40673e-07	1.97367e-06	NA	NA	0	0	0	0	0	0	0	0	0	0	1
I	998045	998413	369	1	SPNCRNA.163	NULL	5	0	9	5	-0.830039	-16.6096	-0.0289086	-1.39724	4.53897	6.59974	2.47821	0.375501	-1.41311	0.467848	0.656157	NA	NA	0	0	0	0	0	0	0	0	0	0	1
I	998686	1002361	3676	1	SPAC821.09	NULL	5495	4409	12947	18741	5.95547	5.92961	7.14504	7.15826	9625.84	13747.5	5504.22	0.400381	-1.32055	2.77523e-35	6.23856e-34	NA	NA	0	0	0	0	0	0	0	0	0	0	1
I	1005499	1005710	212	1	SPNCRNA.164	NULL	4	3	5	2	-0.352417	-0.475639	-0.0773485	-1.9196	3.62733	3.38006	3.87461	1.14632	0.197004	0.92435	0.999973	NA	NA	0	0	0	0	0	0	0	0	0	0	1
I	1006259	1008003	1745	1	SPAC821.11	NULL	4312	3457	3272	4704	6.68061	6.65359	6.23557	6.23893	3889.94	3462.41	4317.47	1.24696	0.318411	0.00401205	0.0117666	NA	NA	0	0	0	0	0	0	0	0	0	0	1
I	1008215	1010318	2104	1	SPAC821.12	NULL	2130	1814	3068	4214	5.62477	5.6849	6.10436	6.04189	2686.93	3174.08	2199.77	0.693042	-0.528985	2.83846e-06	1.44622e-05	NA	NA	0	0	0	0	0	0	0	0	0	0	1
I	1015475	1015830	356	1	SPNCRNA.220	NULL	0	0	0	0	-16.6096	-16.6096	-16.6096	-16.6096	0	0	0	NA	NA	NA	NA	NA	NA	0	0	0	0	0	0	0	0	0	0	1
I	1018733	1021093	2361	1	SPNCRNA.704	c("SPAC139.01c", "SPAC139.02c")	30	34	40	48	-0.92278	-0.450401	-0.554604	-0.811929	37.5694	38.8265	36.3124	0.935248	-0.0965788	0.835054	0.947268	NA	NA	0	0	0	0	0	0	0	0	0	0	1
I	1021695	1024135	2441	1	SPAC139.03	SPAC139.04c	977	755	1066	1345	4.10252	4.02245	4.18144	3.99648	1009.68	1058.96	960.406	0.906933	-0.140933	0.340472	0.522972	NA	NA	0	0	0	0	0	0	0	0	0	0	1
I	1025199	1025635	437	1	SPNCRNA.705	SPAC139.04c	1	2	0	6	-3.39585	-2.10413	-16.6096	-1.37822	1.98344	2.20988	1.757	0.795066	-0.330853	0.888318	0.983314	NA	NA	0	0	0	0	0	0	0	0	0	0	1
I	1027811	1029993	2183	1	SPAC139.05	SPNCRNA.706	1150	1033	113	209	4.45081	4.58783	1.05672	1.42353	679.1	136.719	1221.48	8.93424	3.15935	1.2505e-54	3.54869e-53	NA	NA	0	0	0	0	0	0	0	0	0	0	1
I	1030125	1031941	1817	1	SPAC139.06	c("SPNCRNA.706", "SPNCRNA.707")	2052	1490	2575	3729	5.8372	5.6673	6.11789	6.13174	2345.79	2734.81	1956.77	0.715506	-0.482964	3.47237e-05	0.000148547	NA	NA	0	0	0	0	0	0	0	0	0	0	1
I	1032085	1034167	2083	1	SPAC23C4.02	SPNCRNA.707	5444	3916	8205	12011	6.89188	6.7084	7.43686	7.46627	6964.85	8761.68	5168.02	0.589843	-0.761596	1.55576e-12	1.57864e-11	NA	NA	0	0	0	0	0	0	0	0	0	0	1
I	1034296	1035992	1697	1	SPAC23C4.03	NULL	2368	2112	3642	5333	5.85617	5.98292	6.43037	6.46023	3197.68	3889.69	2505.68	0.644184	-0.634454	6.86201e-09	4.98127e-08	NA	NA	0	0	0	0	0	0	0	0	0	0	1
I	1036033	1036508	476	1	SPAC23C4.04c	NULL	83	78	160	217	3.02601	3.22819	3.92604	3.8453	127.423	164.514	90.3314	0.549081	-0.864909	0.000611406	0.00212364	NA	NA	0	0	0	0	0	0	0	0	0	0	1
I	1038379	1041195	2817	1	SPAC23C4.07	SPAC23C4.06c	94	92	71	129	0.47014	0.730925	0.0184462	0.359561	94.831	85.0491	104.613	1.23003	0.298693	0.390525	0.577039	NA	NA	0	0	0	0	0	0	0	0	0	0	1
I	1041414	1043083	1670	1	SPAC23C4.08	c("SPAC23C4.06c", "SPAC23C4.09c")	848	796	875	1300	4.79052	4.99104	4.78889	4.83968	931.867	941.408	922.326	0.979731	-0.0295427	0.705799	0.860668	NA	NA	0	0	0	0	0	0	0	0	0	0	1
I	1044844	1046788	1945	1	SPAC23C4.10	NULL	1034	861	1460	1926	4.46395	4.49161	4.91483	4.7941	1268.38	1481.25	1055.51	0.712579	-0.488878	0.000108592	0.00043192	NA	NA	0	0	0	0	0	0	0	0	0	0	1
I	1047065	1047741	677	1	SPAC23C4.11	SPNCRNA.708	1225	856	1148	1853	6.44423	6.21894	6.30371	6.47409	1218.22	1289.42	1147.02	0.889568	-0.168823	0.175182	0.31225	NA	NA	0	0	0	0	0	0	0	0	0	0	1
I	1048957	1051136	2180	1	SPAC23C4.12	NULL	1105	872	1000	1511	4.57243	4.52259	4.38152	4.45667	1091.42	1085.21	1097.64	1.01145	0.0164311	0.940731	1	NA	NA	0	0	0	0	0	0	0	0	0	0	1
I	1051665	1052724	1060	1	SPAC23C4.13	NULL	996	654	1176	1741	5.41662	5.10158	5.60944	5.6551	1084.55	1262.97	906.124	0.717456	-0.479037	0.000298392	0.00110009	NA	NA	0	0	0	0	0	0	0	0	0	0	1
I	1052875	1054468	1594	1	SPAC23C4.14	NULL	1299	848	1531	2198	5.28404	4.96059	5.47426	5.47561	1398.81	1618.97	1178.66	0.728028	-0.457934	0.000348946	0.00126893	NA	NA	0	0	0	0	0	0	0	0	0	0	1
I	1054665	1055906	1242	1	SPAC23C4.15	SPAC23C4.16c	2154	1770	3302	4446	6.53092	6.53946	7.10038	7.00919	2783.58	3383.24	2183.92	0.64551	-0.631488	2.89819e-08	1.93492e-07	NA	NA	0	0	0	0	0	0	0	0	0	0	1
I	1057701	1061166	3466	1	SPAC23C4.17	c("SPNCRNA.709", "SPAC23C4.18c")	1528	977	2317	3390	4.32128	3.96788	4.87504	4.9037	1923.53	2473.55	1373.52	0.555282	-0.848708	2.16413e-12	2.17209e-11	NA	NA	0	0	0	0	0	0	0	0	0	0	1
I	1063021	1063448	428	1	SPNCRNA.166	SPAC23C4.18c	1	5	6	2	-3.36583	-0.752216	-0.82785	-2.93309	3.77889	3.90874	3.64904	0.93356	-0.0991856	1	1	NA	NA	0	0	0	0	0	0	0	0	0	0	1
I	1063729	1066954	3226	1	SPAC23C4.19	SPAC1A6.01c	6001	5160	9432	12486	6.27094	6.34492	6.87645	6.76076	7906.99	9585.33	6228.66	0.649812	-0.621906	4.70634e-09	3.45746e-08	NA	NA	0	0	0	0	0	0	0	0	0	0	1
I	1068668	1070235	1568	1	SPAC1A6.02	c("SPAC1A6.01c", "SPAC1A6.03c")	730	710	1507	2173	4.27253	4.52426	5.27138	5.27903	1203.34	1597.07	809.602	0.506928	-0.980147	4.57845e-15	5.60814e-14	NA	NA	0	0	0	0	0	0	0	0	0	0	1
I	1073171	1074075	905	1	SPAC1A6.11	NULL	27	22	21	33	0.30861	0.304968	-0.100812	0.0309003	25.257	23.2567	27.2573	1.17202	0.228993	0.721352	0.865478	NA	NA	0	0	0	0	0	0	0	0	0	0	1
I	1081802	1083525	1724	1	SPNCRNA.710	SPAC1A6.06c	96	93	143	193	1.20891	1.45492	1.73696	1.64918	126.461	146.687	106.235	0.724231	-0.465479	0.0607635	0.129787	NA	NA	0	0	0	0	0	0	0	0	0	0	1
I	1084068	1086426	2359	1	SPAC1A6.07	SPAC1A6.08c	1944	1463	2004	2848	5.09634	4.97805	5.09334	5.08004	1997.33	2108.44	1886.21	0.8946	-0.160685	0.18456	0.324942	NA	NA	0	0	0	0	0	0	0	0	0	0	1
I	1090678	1092303	1626	1	SPAC1A6.10	NULL	5138	3997	5371	7498	7.03536	6.96489	7.05249	7.01344	5334.31	5601.19	5067.44	0.904708	-0.144476	0.192567	0.336429	NA	NA	0	0	0	0	0	0	0	0	0	0	1
I	1092387	1094379	1993	1	SPAC30D11.14c	SPAC30D11.13	3053	2507	3341	4468	5.99077	5.99832	6.07397	5.97295	3253.14	3411.96	3094.31	0.9069	-0.140984	0.218021	0.37265	NA	NA	0	0	0	0	0	0	0	0	0	0	1
I	1096369	1096466	98	1	SPATRNASER.01	NULL	686	660	1400	2305	8.18284	8.41891	9.16513	9.36411	1172.69	1589.12	756.259	0.475897	-1.07128	6.08041e-11	5.31217e-10	NA	NA	0	0	0	0	0	0	0	0	0	0	1
I	1096474	1096545	72	1	SPATRNAMET.01	NULL	0	0	0	1	-16.6096	-16.6096	-16.6096	-1.36162	0.184157	0.368314	0	0	#NAME?	1	1	NA	NA	0	0	0	0	0	0	0	0	0	0	1
I	1099991	1101663	1673	1	SPNCRNA.711	SPAC30D11.10	6	4	17	16	-2.74768	-3.0408	-1.29209	-1.8999	10.1886	14.8807	5.49657	0.369377	-1.43684	0.133399	0.250284	NA	NA	0	0	0	0	0	0	0	0	0	0	1
I	1101649	1103816	2168	1	SPNCRNA.712	SPAC30D11.09	883	659	533	755	4.07961	3.94929	3.30447	3.28645	706.568	559.866	853.27	1.52406	0.607921	1.3171e-05	6.04838e-05	NA	NA	0	0	0	0	0	0	0	0	0	0	1
I	1104753	1106608	1856	1	SPAC30D11.08c	SPAC30D11.07	1802	1375	1743	2385	5.37149	5.27313	5.27661	5.20866	1780.13	1799.93	1760.33	0.978002	-0.0320905	0.843444	0.953452	NA	NA	0	0	0	0	0	0	0	0	0	0	1
I	1108485	1110686	2202	1	SPAC30D11.06c	SPAC30D11.05	676	561	977	1204	3.85527	3.87806	4.33975	4.12079	824.421	959.975	688.866	0.717587	-0.478775	0.000614825	0.00213429	NA	NA	0	0	0	0	0	0	0	0	0	0	1
I	1112170	1115868	3699	1	SPAC30D11.04c	NULL	5125	3625	7088	9801	5.86277	5.65501	6.28374	6.23093	6091.77	7357.17	4826.38	0.656011	-0.608208	3.05666e-08	2.03168e-07	NA	NA	0	0	0	0	0	0	0	0	0	0	1
I	1118926	1119763	838	1	SPAC30D11.02c	NULL	2	7	5	9	-3.09607	-0.996993	-1.82107	-1.49344	5.68215	5.95825	5.40605	0.907321	-0.140315	0.887545	0.982759	NA	NA	0	0	0	0	0	0	0	0	0	0	1
I	1119880	1123773	3894	1	SPAC30D11.01c	NULL	563	363	446	626	2.58544	2.24409	2.20249	2.17125	487.171	466.358	507.983	1.08926	0.123343	0.353321	0.537074	NA	NA	0	0	0	0	0	0	0	0	0	0	1
I	1124058	1129104	5047	1	SPAC56F8.02	SPNCRNA.713	2071	1459	3297	4666	4.09039	3.87685	4.71436	4.69503	2704.13	3461.63	1946.64	0.562347	-0.830466	6.80016e-13	7.09201e-12	NA	NA	0	0	0	0	0	0	0	0	0	0	1
I	1129519	1133089	3571	1	SPAC56F8.03	SPNCRNA.714	8027	6375	14790	20728	6.54402	6.5034	7.37885	7.34545	11726.4	15453.7	7999.11	0.517619	-0.950038	2.11641e-19	3.18363e-18	NA	NA	0	0	0	0	0	0	0	0	0	0	1
I	1134589	1135838	1250	1	SPNCRNA.715	SPAC56F8.05c	20	5	5	11	-0.590278	-2.29841	-2.63707	-2.01996	9.88056	6.69488	13.0662	1.95168	0.964715	0.373159	0.559996	NA	NA	0	0	0	0	0	0	0	0	0	0	1
I	1138566	1139117	552	1	SPAC56F8.07	NULL	152	109	122	196	3.51489	3.32696	3.15084	3.31445	140.385	136.689	144.082	1.05408	0.0759893	0.780965	0.912379	NA	NA	0	0	0	0	0	0	0	0	0	0	1
I	1139130	1140325	1196	1	SPAC56F8.08	NULL	2601	2052	2302	3325	6.64085	6.59063	6.41782	6.42792	2512.5	2441.68	2583.32	1.05801	0.0813546	0.482552	0.66997	NA	NA	0	0	0	0	0	0	0	0	0	0	1
I	1140580	1142002	1423	1	SPAC56F8.09	NULL	490	468	809	1122	3.8374	4.06294	4.51391	4.4654	689.489	840.955	538.023	0.639777	-0.64436	3.7243e-06	1.86666e-05	NA	NA	0	0	0	0	0	0	0	0	0	0	1
I	1143063	1145256	2194	1	SPAC56F8.10	NULL	1819	1248	2637	4031	5.10507	4.85335	5.59396	5.68584	2283.74	2878.82	1688.66	0.586582	-0.769595	4.34927e-11	3.8502e-10	NA	NA	0	0	0	0	0	0	0	0	0	0	1
I	1145305	1146800	1496	1	SPAC56F8.11	SPNCRNA.716	931	786	1338	2001	4.96549	5.01305	5.44186	5.50214	1200.77	1444.38	957.158	0.662678	-0.593619	1.77944e-06	9.34812e-06	NA	NA	0	0	0	0	0	0	0	0	0	0	1
I	1146833	1148085	1253	1	SPAC56F8.12	SPNCRNA.716	5	7	8	8	-2.59367	-1.81647	-1.96249	-2.48282	7.03448	7.17599	6.89297	0.96056	-0.0580524	1	1	NA	NA	0	0	0	0	0	0	0	0	0	0	1
I	1149078	1150659	1582	1	SPAC56F8.13	SPAC56F8.14c	102	102	200	185	1.42038	1.71219	2.34495	1.71212	144.38	173.875	114.885	0.660732	-0.597863	0.16813	0.301995	NA	NA	0	0	0	0	0	0	0	0	0	0	1
I	1151431	1153638	2208	1	SPAC56F8.15	SPAC56F8.14c	277	142	353	568	2.38071	1.70853	2.68363	2.84949	311.339	395.828	226.849	0.573101	-0.803139	0.00204821	0.00637457	NA	NA	0	0	0	0	0	0	0	0	0	0	1
I	1153572	1156804	3233	1	SPAC56F8.16	SPAC22A12.01c	2213	1158	1681	2656	4.82862	4.18606	4.38508	4.52465	1847.07	1866.96	1827.18	0.978694	-0.0310704	0.992678	1	NA	NA	0	0	0	0	0	0	0	0	0	0	1
I	1163057	1163522	466	1	SPAC22A12.05	NULL	620	468	829	1149	5.78742	5.67348	6.15967	6.11024	731.965	861.473	602.456	0.699333	-0.515948	0.000283756	0.00104839	NA	NA	0	0	0	0	0	0	0	0	0	0	1
I	1165698	1166644	947	1	SPNCRNA.717	SPAC22A12.07c	60	48	13	25	1.39516	1.36505	-0.858126	-0.435079	38.046	16.0808	60.0112	3.73186	1.8999	4.67055e-05	0.000196651	NA	NA	0	0	0	0	0	0	0	0	0	0	1
I	1172209	1176801	4593	1	SPAC22A12.10	c("SPAC22A12.09c", "SPNCRNA.718")	3275	2551	4322	6058	4.90333	4.83472	5.25668	5.22346	3874.16	4516.22	3232.09	0.715663	-0.482648	1.33967e-05	6.14733e-05	NA	NA	0	0	0	0	0	0	0	0	0	0	1
I	1176703	1178897	2195	1	SPAC22A12.11	SPAC22A12.12c	3289	2794	4175	6567	5.95891	6.01541	6.25618	6.38928	4009.13	4625.98	3392.29	0.733313	-0.4475	2.27674e-05	0.000100293	NA	NA	0	0	0	0	0	0	0	0	0	0	1
I	1180184	1181157	974	1	SPAC22A12.13	SPAC22A12.14c	292	236	348	489	3.63753	3.62216	3.8438	3.81418	328.828	364.088	293.568	0.806311	-0.310592	0.0774616	0.159139	NA	NA	0	0	0	0	0	0	0	0	0	0	1
I	1181117	1182594	1478	1	SPNCRNA.719	SPAC22A12.14c	87	75	48	44	1.289	1.36669	0.384172	-0.261716	66.0023	41.5827	90.4219	2.17451	1.12069	0.000671046	0.00231008	NA	NA	0	0	0	0	0	0	0	0	0	0	1
I	1186205	1187928	1724	1	SPAC22A12.16	SPAC22A12.17c	11384	9998	15741	21455	8.1489	8.25342	8.56956	8.49599	14086.1	16224.2	11947.9	0.736426	-0.441387	1.82606e-05	8.17302e-05	NA	NA	0	0	0	0	0	0	0	0	0	0	1
I	1189967	1190942	976	1	SPNCRNA.168	SPNCRNA.720	4	5	4	12	-2.55517	-1.94146	-2.60202	-1.53747	5.83524	6.53451	5.13597	0.785977	-0.347441	0.752818	0.890648	NA	NA	0	0	0	0	0	0	0	0	0	0	1
I	1191107	1192276	1170	1	SPNCRNA.721	NULL	160	100	175	253	2.50512	2.11887	2.58755	2.59897	164.037	185.703	142.371	0.766657	-0.383347	0.111862	0.216824	NA	NA	0	0	0	0	0	0	0	0	0	0	1
I	1192210	1193756	1547	1	SPAC4C5.01	SPAC4C5.02c	1406	1088	1884	2720	5.57077	5.49267	5.94612	5.95556	1690.45	1997.86	1383.05	0.692268	-0.530597	9.93019e-06	4.64182e-05	NA	NA	0	0	0	0	0	0	0	0	0	0	1
I	1196723	1198284	1562	1	SPAC4C5.03	SPNCRNA.722	1493	1121	1184	1988	5.3103	5.18869	4.9289	5.15619	1402.58	1358.17	1446.99	1.06539	0.0913858	0.527059	0.709046	NA	NA	0	0	0	0	0	0	0	0	0	0	1
I	1198224	1199733	1510	1	SPAC4C5.04	SPNCRNA.722	468	396	827	1149	3.93183	3.98264	4.70636	4.66041	671.063	860.415	481.71	0.559857	-0.836869	5.25675e-09	3.85238e-08	NA	NA	0	0	0	0	0	0	0	0	0	0	1
I	1200009	1200876	868	1	SPNCRNA.723	NULL	11504	12147	15664	21637	9.10378	9.47406	9.50224	9.44793	14806.6	16250.5	13362.7	0.822295	-0.282271	0.120206	0.230026	NA	NA	0	0	0	0	0	0	0	0	0	0	1
I	1200168	1200253	86	1	SPSNORNA.07	NULL	255	198	4548	6388	6.94357	6.87039	11.0534	11.0231	2504.26	4757.25	251.263	0.052817	-4.24286	1.74692e-213	2.05588e-211	NA	NA	0	0	0	0	0	0	0	0	0	0	1
I	1200394	1200501	108	1	SPSNORNA.08	NULL	1792	2508	3755	4882	9.42795	10.2047	10.4483	10.3066	3126.63	3783.32	2469.94	0.652849	-0.615179	0.0527912	0.115408	NA	NA	0	0	0	0	0	0	0	0	0	0	1
I	1200646	1200729	84	1	SPSNORNA.09	NULL	2303	2701	3733	4735	10.1525	10.6743	10.8024	10.6251	3281.24	3717.55	2844.93	0.765271	-0.385958	0.132513	0.248909	NA	NA	0	0	0	0	0	0	0	0	0	0	1
I	1206325	1210885	4561	1	SPNCRNA.724	SPAC10F6.02c	483	395	353	442	2.13623	2.13788	1.63702	1.44104	418.967	349.421	488.514	1.39807	0.483435	0.0022877	0.00704325	NA	NA	0	0	0	0	0	0	0	0	0	0	1
I	1213255	1216120	2866	1	SPAC10F6.04	c("SPAC10F6.03c", "SPAC10F6.05c")	752	754	991	1473	3.46757	3.76322	3.81887	3.87031	957.355	1066.45	848.256	0.795399	-0.33025	0.0262997	0.0628386	NA	NA	0	0	0	0	0	0	0	0	0	0	1
I	1217077	1218228	1152	1	SPAC10F6.06	NULL	5291	4081	3349	5492	7.57488	7.49208	6.86822	7.06146	4494.8	3793.35	5196.25	1.36983	0.453999	5.25078e-05	0.000219389	NA	NA	0	0	0	0	0	0	0	0	0	0	1
I	1219252	1220071	820	1	SPNCRNA.554	SPAC10F6.08c	8	6	2	5	-1.30396	-1.42718	-3.3507	-2.5492	5.32408	2.89894	7.74922	2.67312	1.41853	0.30222	0.479621	NA	NA	0	0	0	0	0	0	0	0	0	0	1
I	1220911	1225530	4620	1	SPNCRNA.725	SPAC10F6.09c	301	192	196	307	1.43543	1.07859	0.76967	0.896691	243.487	216.695	270.279	1.24728	0.318785	0.0922001	0.184708	NA	NA	0	0	0	0	0	0	0	0	0	0	1
I	1225464	1227365	1902	1	SPAC10F6.10	SPAC10F6.11c	1430	1221	2769	3746	5.11329	5.17715	6.01979	5.93541	2161.23	2843.63	1478.83	0.520049	-0.94328	7.03144e-16	8.98886e-15	NA	NA	0	0	0	0	0	0	0	0	0	0	1
I	1232132	1233115	984	1	SPNCRNA.726	c("SPAC10F6.13c", "SPAC10F6.14c")	42	31	20	17	0.825296	0.678989	-0.29194	-1.04676	28.6016	16.835	40.3681	2.39786	1.26175	0.00998267	0.026659	NA	NA	0	0	0	0	0	0	0	0	0	0	1
I	1234451	1234849	399	1	SPNCRNA.82	NULL	20426	16302	29260	49997	11.0534	11.0198	11.525	11.7776	27144.6	33883.9	20405.3	0.602213	-0.731654	2.84802e-06	1.45047e-05	NA	NA	0	0	0	0	0	0	0	0	0	0	1
I	1234476	1235111	636	1	SPNCRNA.727	NULL	47531	46184	73068	103601	11.5992	11.8495	12.1727	12.1561	64736.7	76787.7	52685.7	0.686122	-0.543463	9.90953e-06	4.63578e-05	NA	NA	0	0	0	0	0	0	0	0	0	0	1
I	1234963	1235045	83	1	SPSNORNA.10	NULL	29372	31386	48710	61007	13.8426	14.2301	14.5255	14.3299	41287.3	48222	34352.5	0.712383	-0.489275	0.0225021	0.0549127	NA	NA	0	0	0	0	0	0	0	0	0	0	1
I	1235601	1237035	1435	1	SPAC10F6.15	SPNCRNA.728	21	20	24	24	-0.719009	-0.497588	-0.573222	-1.09358	22.275	21.528	23.0221	1.0694	0.0968057	0.874096	0.973435	NA	NA	0	0	0	0	0	0	0	0	0	0	1
I	1236996	1238533	1538	1	SPNCRNA.729	SPNCRNA.728	66	55	19	44	0.833047	0.861826	-1.01025	-0.319124	46.8253	26.2508	67.3998	2.56753	1.36038	0.00128784	0.00419519	NA	NA	0	0	0	0	0	0	0	0	0	0	1
I	1237146	1238641	1496	1	SPNCRNA.432	SPNCRNA.728	58	54	22	56	0.68658	0.875299	-0.75881	0.0687402	47.5303	32.2566	62.804	1.94701	0.96126	0.0268009	0.0638836	NA	NA	0	0	0	0	0	0	0	0	0	0	1
I	1238896	1240185	1290	1	SPAC10F6.16	SPAC10F6.17c	2236	1976	1711	2839	6.2964	6.40987	5.86346	6.07364	2152.35	1950.22	2354.48	1.20729	0.271769	0.0708639	0.147682	NA	NA	0	0	0	0	0	0	0	0	0	0	1
I	1243849	1245837	1989	1	SPAC56E4.03	SPAC56E4.04c	14140	10712	5883	9173	8.20515	8.09641	6.89314	7.01362	10126.5	6488.8	13764.2	2.12123	1.0849	2.93233e-24	5.1537e-23	NA	NA	0	0	0	0	0	0	0	0	0	0	1
I	1255324	1256414	1091	1	SPAC56E4.05	SPAC56E4.06c	589	499	645	1025	4.56498	4.61757	4.64916	4.79705	662.583	718.524	606.643	0.84429	-0.244189	0.066482	0.139886	NA	NA	0	0	0	0	0	0	0	0	0	0	1
I	1256349	1260334	3986	1	SPAC56E4.07	c("SPAC56E4.06c", "SPAC1420.01c")	1799	1394	1374	2067	4.22774	4.15159	3.79207	3.86086	1629.27	1487.72	1770.83	1.1903	0.251323	0.0396837	0.089829	NA	NA	0	0	0	0	0	0	0	0	0	0	1
I	1263452	1265929	2478	1	SPNCRNA.730	SPAC1420.02c	98	65	44	50	0.715243	0.414717	-0.48688	-0.822813	65.6225	41.6778	89.5671	2.14903	1.10369	0.000804171	0.00271847	NA	NA	0	0	0	0	0	0	0	0	0	0	1
I	1266194	1267780	1587	1	SPAC1420.03	NULL	1	1	1	5	-5.21269	-4.92098	-5.25953	-3.45836	1.74829	2.37025	1.12632	0.475191	-1.07342	0.719406	0.864586	NA	NA	0	0	0	0	0	0	0	0	0	0	1
I	1268172	1269878	1707	1	SPNCRNA.731	SPAC1420.04c	0	0	0	0	-16.6096	-16.6096	-16.6096	-16.6096	0	0	0	NA	NA	NA	NA	NA	NA	0	0	0	0	0	0	0	0	0	0	1
I	1269930	1271746	1817	1	SPAPB17E12.02	SPAC1420.04c	2	0	0	0	-4.30195	-16.6096	-16.6096	-16.6096	0.495642	0	0.991284	Inf	Inf	0.704935	0.859966	NA	NA	0	0	0	0	0	0	0	0	0	0	1
I	1271681	1273892	2212	1	SPAPB17E12.03	SPAPB17E12.04c	430	385	510	744	3.06501	3.19735	3.26432	3.28876	499.797	543.655	455.938	0.838653	-0.253854	0.0827473	0.16847	NA	NA	0	0	0	0	0	0	0	0	0	0	1
I	1275439	1275999	561	1	SPAPB17E12.05	NULL	3917	3393	4351	6551	8.36265	8.44728	8.46739	8.5374	4397.23	4713.13	4081.33	0.865948	-0.207648	0.0412553	0.0928263	NA	NA	0	0	0	0	0	0	0	0	0	0	1
I	1276506	1279000	2495	1	SPAPB17E12.06	SPAPB17E12.07c	432	348	587	782	3.01989	2.99976	3.41536	3.30881	515.977	598.36	433.594	0.724638	-0.464668	0.00276341	0.0083683	NA	NA	0	0	0	0	0	0	0	0	0	0	1
I	1279573	1280325	753	1	SPAPB17E12.08	NULL	188	146	255	298	3.63087	3.55792	4.02377	3.72823	214.916	244.572	185.26	0.757486	-0.400709	0.067199	0.141222	NA	NA	0	0	0	0	0	0	0	0	0	0	1
I	1280537	1281411	875	1	SPAPB17E12.09	SPAPB17E12.10c	7	17	6	5	-1.51235	0.0595469	-1.78159	-2.56495	9.60237	5.01368	14.1911	2.83047	1.50104	0.253285	0.417814	NA	NA	0	0	0	0	0	0	0	0	0	0	1
I	1283080	1284482	1403	1	SPAPB17E12.11	SPAPB17E12.12c	1462	943	1431	2381	5.74455	5.40375	5.66678	5.88096	1476.43	1633.5	1319.36	0.807687	-0.308131	0.0838041	0.170304	NA	NA	0	0	0	0	0	0	0	0	0	0	1
I	1285627	1286338	712	1	SPAPB17E12.13	SPAPB17E12.14c	25325	20423	30491	43887	10.6796	10.661	10.9005	10.9056	28858.4	32284.3	25432.5	0.787767	-0.34416	0.000748482	0.00254887	NA	NA	0	0	0	0	0	0	0	0	0	0	1
I	1289725	1290996	1272	1	SPNCRNA.732	NULL	109	85	172	186	1.83079	1.76381	2.44201	2.03455	133.537	159.44	107.633	0.675067	-0.566898	0.0332082	0.0767632	NA	NA	0	0	0	0	0	0	0	0	0	0	1
I	1290931	1293853	2923	1	SPAC1565.01	SPAC1565.02c	1640	1384	2161	2443	4.54173	4.58869	4.89288	4.54947	1864	2042.28	1685.71	0.825408	-0.27682	0.193659	0.338037	NA	NA	0	0	0	0	0	0	0	0	0	0	1
I	1294306	1295341	1036	1	SPAC1565.03	c("SPNCRNA.733", "SPAC1565.04c")	70	53	85	125	1.48796	1.37842	1.72122	1.75725	79.5492	90.9775	68.121	0.748768	-0.41741	0.184404	0.324827	NA	NA	0	0	0	0	0	0	0	0	0	0	1
I	1297168	1299830	2663	1	SPAC1565.05	SPAC1565.06c	3476	2646	6047	8760	5.75986	5.65806	6.5118	6.52614	4907.51	6423.39	3391.63	0.528013	-0.921355	3.46532e-17	4.74319e-16	NA	NA	0	0	0	0	0	0	0	0	0	0	1
I	1305861	1306249	389	1	SPNCRNA.169	SPAC1565.07c	4	0	0	6	-1.22811	-16.6096	-16.6096	-1.21036	2.09623	2.20988	1.98257	0.897138	-0.156599	1	1	NA	NA	0	0	0	0	0	0	0	0	0	0	1
I	1306168	1309266	3099	1	SPAC1565.08	NULL	24039	18782	22009	31030	8.3573	8.29308	8.18316	8.15836	23412.4	23064.6	23760.2	1.03016	0.0428645	0.659558	0.826358	NA	NA	0	0	0	0	0	0	0	0	0	0	1
I	1309676	1313429	3754	1	SPAC6F12.02	SPAC6F12.03c	1606	1065	1878	2630	4.15053	3.84972	4.3294	4.2949	1714.61	1961.54	1467.68	0.748228	-0.418451	0.000824594	0.0027828	NA	NA	0	0	0	0	0	0	0	0	0	0	1
I	1316008	1316643	636	1	SPAC6F12.04	NULL	1291	1053	2004	2734	6.39688	6.39471	6.98441	6.91218	1685.22	2066.46	1303.98	0.631023	-0.664236	3.60568e-08	2.37685e-07	NA	NA	0	0	0	0	0	0	0	0	0	0	1
I	1316808	1316891	84	1	SPSNORNA.53	NULL	12025	10892	6671	10681	12.5369	12.686	11.64	11.7987	10145.1	7460.82	12829.5	1.71958	0.782055	2.05004e-07	1.22492e-06	NA	NA	0	0	0	0	0	0	0	0	0	0	1
I	1318942	1321136	2195	1	SPAC6F12.06	SPAC6F12.05c	3181	2701	2800	3991	5.91074	5.96657	5.67983	5.6708	3115.18	2950.26	3280.11	1.1118	0.1529	0.191403	0.334732	NA	NA	0	0	0	0	0	0	0	0	0	0	1
I	1321091	1322357	1267	1	SPAC6F12.07	SPAC6F12.08c	1836	1561	2921	3937	6.47132	6.52904	7.09436	7.00463	2444.42	2994.34	1894.49	0.63269	-0.660429	8.7039e-09	6.2489e-08	NA	NA	0	0	0	0	0	0	0	0	0	0	1
I	1324591	1329061	4471	1	SPAC6F12.09	SPAC6F12.08c	1498	1265	1653	2486	3.82397	3.87189	3.91917	3.98754	1664.91	1789.54	1540.28	0.860712	-0.216398	0.0566696	0.122349	NA	NA	0	0	0	0	0	0	0	0	0	0	1
I	1332337	1333254	918	1	SPNCRNA.734	SPAC6F12.10c	11	12	3	6	-1.00741	-0.590068	-2.92865	-2.44904	8.40808	3.79594	13.0202	3.43004	1.77823	0.0902948	0.181466	NA	NA	0	0	0	0	0	0	0	0	0	0	1
I	1335436	1338402	2967	1	SPAC6F12.12	c("SPAC6F12.11c", "SPAC6F12.13c")	2057	1552	2407	3351	4.97136	4.85676	5.1512	5.10819	2252.56	2506.77	1998.35	0.797183	-0.327016	0.00562629	0.01591	NA	NA	0	0	0	0	0	0	0	0	0	0	1
I	1340220	1342448	2229	1	SPAC6F12.14	SPAC6F12.15c	685	524	771	1207	3.90442	3.8097	4.02819	4.15445	761.081	852.171	669.991	0.786217	-0.347001	0.0105535	0.0280152	NA	NA	0	0	0	0	0	0	0	0	0	0	1
I	1343999	1345867	1869	1	SPNCRNA.735	c("SPAC6F12.15c", "SPAC6F12.16c")	196	155	95	117	2.12215	2.07538	1.03044	0.810588	144.11	93.3178	194.901	2.08858	1.06252	7.89656e-06	3.73926e-05	NA	NA	0	0	0	0	0	0	0	0	0	0	1
I	1348687	1351231	2545	1	SPAC6F12.17	NULL	4749	3760	5124	7114	6.30003	6.25495	6.36282	6.31585	5027.17	5329.17	4725.16	0.88666	-0.173546	0.114594	0.221298	NA	NA	0	0	0	0	0	0	0	0	0	0	1
I	1354204	1357184	2981	1	SPAC19E9.02	SPNCRNA.736	2851	2399	3831	5446	5.47174	5.51451	5.85113	5.83825	3478.65	4031.23	2926.08	0.725852	-0.462252	2.49178e-05	0.000109006	NA	NA	0	0	0	0	0	0	0	0	0	0	1
I	1357621	1359568	1948	1	SPNCRNA.737	c("SPNCRNA.736", "SPNCRNA.86")	23	19	21	46	-1.0287	-1.01252	-1.2068	-0.595928	25.7138	28.0448	23.3827	0.833761	-0.262293	0.581207	0.759339	NA	NA	0	0	0	0	0	0	0	0	0	0	1
I	1361066	1364174	3109	1	SPAC19E9.03	NULL	8211	5141	3247	5092	6.77659	6.3929	5.39129	5.52005	5452.07	3592.1	7312.04	2.03559	1.02545	6.47104e-06	3.11961e-05	NA	NA	0	0	0	0	0	0	0	0	0	0	1
I	1364749	1367968	3220	1	SPAC57A10.02	NULL	2772	1985	3126	4390	5.15935	4.96938	5.28589	5.25543	2947.69	3269.57	2625.82	0.803109	-0.316332	0.0066428	0.0184755	NA	NA	0	0	0	0	0	0	0	0	0	0	1
I	1368172	1369574	1403	1	SPAC57A10.03	SPNCRNA.739	360	236	678	1020	3.94253	3.62513	4.80896	4.87781	530.7	734.129	327.272	0.445796	-1.16554	7.57265e-14	8.48759e-13	NA	NA	0	0	0	0	0	0	0	0	0	0	1
I	1370156	1371501	1346	1	SPAC57A10.04	SPAC57A10.14	53	49	40	94	0.778108	0.95671	0.325263	1.03756	56.4706	55.7689	57.1724	1.02517	0.0358571	0.952149	1	NA	NA	0	0	0	0	0	0	0	0	0	0	1
I	1376587	1377072	486	1	SPAC57A10.06	NULL	68	53	24	14	2.8119	2.74417	1.26255	-0.035416	42.4873	17.8448	67.1297	3.76185	1.91144	4.15389e-06	2.06559e-05	NA	NA	0	0	0	0	0	0	0	0	0	0	1
I	1377248	1378479	1232	1	SPAC57A10.07	SPAC57A10.08c	941	789	1469	2058	4.98675	5.02439	5.58246	5.54851	1249.32	1534.63	964.006	0.628169	-0.670776	8.61117e-08	5.39501e-07	NA	NA	0	0	0	0	0	0	0	0	0	0	1
I	1387893	1390617	2725	1	SPAC20G8.01	NULL	2500	1946	3322	4802	5.3062	5.23659	5.66946	5.68068	2995.67	3524.94	2466.41	0.699703	-0.515185	4.59323e-06	2.26715e-05	NA	NA	0	0	0	0	0	0	0	0	0	0	1
I	1390637	1393081	2445	1	SPAC20G8.02	NULL	1561	1332	1889	2672	4.72812	4.79106	4.95642	4.93635	1798.29	1982.82	1613.76	0.813872	-0.297125	0.0105843	0.0280734	NA	NA	0	0	0	0	0	0	0	0	0	0	1
I	1393608	1395820	2213	1	SPAC20G8.03	SPAC20G8.04c	7596	6211	9112	12454	7.15472	7.15612	7.37039	7.3008	8543.21	9404.36	7682.05	0.816861	-0.291838	0.00596081	0.016769	NA	NA	0	0	0	0	0	0	0	0	0	0	1
I	1398982	1399560	579	1	SPNCRNA.740	SPAC20G8.05c	162	120	114	144	3.53792	3.39677	2.9841	2.80077	134.641	113.307	155.976	1.37657	0.46108	0.0509585	0.111952	NA	NA	0	0	0	0	0	0	0	0	0	0	1
I	1403154	1409763	6610	1	SPAC20G8.06	NULL	7052	4721	12476	18570	5.46887	5.18174	6.24506	6.29852	9954.09	13435.5	6472.71	0.481763	-1.0536	7.78305e-23	1.31403e-21	NA	NA	0	0	0	0	0	0	0	0	0	0	1
I	1421149	1421221	73	1	SPATRNACYS.01	NULL	4	6	0	4	1.18567	2.06244	-16.6096	0.618451	3.61995	1.47325	5.76665	3.91423	1.96873	0.323058	0.503504	NA	NA	0	0	0	0	0	0	0	0	0	0	1
I	1421817	1422972	1156	1	SPAC3A12.02	NULL	408	306	474	557	4.09663	3.9734	4.26609	3.97852	425.479	455.748	395.21	0.867169	-0.205615	0.27312	0.443759	NA	NA	0	0	0	0	0	0	0	0	0	0	1
I	1433938	1434842	905	1	SPAC3A12.07	NULL	964	807	941	1418	5.61949	5.65484	5.53779	5.60902	1003.26	1019.76	986.758	0.967636	-0.0474641	0.653607	0.820714	NA	NA	0	0	0	0	0	0	0	0	0	0	1
I	1434874	1436105	1232	1	SPAC3A12.08	SPAC3A12.09c	429	417	406	498	3.85353	4.10442	3.72718	3.50148	436.845	398.067	475.624	1.19484	0.256812	0.205035	0.353677	NA	NA	0	0	0	0	0	0	0	0	0	0	1
I	1438294	1439013	720	1	SPAC3A12.10	SPNCRNA.741	11711	9774	17260	24011	9.39921	9.43018	9.91192	9.86782	14968.7	17968.7	11968.7	0.666088	-0.586215	1.60399e-08	1.11232e-07	NA	NA	0	0	0	0	0	0	0	0	0	0	1
I	1441020	1442352	1333	1	SPAC3A12.12	SPAC3A12.13c	1128	891	1083	1357	5.13458	5.08612	5.02899	4.83401	1096.69	1072.37	1121.02	1.04537	0.0640124	0.539587	0.72266	NA	NA	0	0	0	0	0	0	0	0	0	0	1
I	1444658	1446333	1676	1	SPAC3A12.14	NULL	4347	3737	5331	7174	6.86324	6.93691	7.11077	7.01878	4986.06	5460.7	4511.41	0.826159	-0.275509	0.0104404	0.0277393	NA	NA	0	0	0	0	0	0	0	0	0	0	1
I	1446480	1449286	2807	1	SPAC3A12.15	NULL	1497	905	1416	2147	4.46853	4.03426	4.34142	4.42156	1426.07	1539.39	1312.74	0.852769	-0.229774	0.247125	0.409793	NA	NA	0	0	0	0	0	0	0	0	0	0	1
I	1451227	1451437	211	1	SPSNORNA.48	SPAC3A12.16c	3	1	1	1	-0.760628	-2.05374	-2.39239	-2.91272	1.5073	0.896999	2.11761	2.36077	1.23926	0.717104	0.863156	NA	NA	0	0	0	0	0	0	0	0	0	0	1
I	1454782	1456870	2089	1	SPAC3A12.18	SPAC9.02c	11084	7736	8931	13943	7.8655	7.6385	7.50706	7.62934	10114.9	9857.09	10372.6	1.0523	0.0735497	0.482693	0.66998	NA	NA	0	0	0	0	0	0	0	0	0	0	1
I	1465785	1469848	4064	1	SPAC9.04	NULL	0	0	0	0	-16.6096	-16.6096	-16.6096	-16.6096	0	0	0	NA	NA	NA	NA	NA	NA	0	0	0	0	0	0	0	0	0	0	1
I	1470851	1476275	5425	1	SPAC9.05	c("SPAC9.06c", "SPAC9.07c")	2458	2044	2496	3390	4.26046	4.28618	4.23574	4.15704	2537.79	2568.18	2507.4	0.976332	-0.0345562	0.768422	0.903549	NA	NA	0	0	0	0	0	0	0	0	0	0	1
I	1476731	1478449	1719	1	SPNCRNA.742	SPAC9.08c	1117	938	256	348	4.75354	4.79339	2.58128	2.50386	704.364	263.517	1145.21	4.34587	2.11965	2.96131e-46	7.67767e-45	NA	NA	0	0	0	0	0	0	0	0	0	0	1
I	1478383	1481172	2790	1	SPAC9.09	c("SPAC9.08c", "SPNCRNA.743")	55391	46371	54715	79678	9.6868	9.72218	9.62223	9.64411	57486.5	58273.5	56699.4	0.972987	-0.0395075	0.64378	0.81227	NA	NA	0	0	0	0	0	0	0	0	0	0	1
I	1481401	1484752	3352	1	SPAC9.10	SPNCRNA.743	360	312	738	1009	2.15653	2.2419	3.1453	3.07617	568.501	761.798	375.203	0.492523	-1.02174	1.10362e-11	1.03823e-10	NA	NA	0	0	0	0	0	0	0	0	0	0	1
I	1481491	1481827	337	1	SPNCRNA.171	SPNCRNA.743	7	6	18	10	-0.213749	-0.144328	1.10196	-0.266393	10.2265	13.1995	7.25358	0.549535	-0.863716	0.42704	0.614651	NA	NA	0	0	0	0	0	0	0	0	0	0	1
I	1485594	1487904	2311	1	SPAC9.11	SPAC9.12c	765	609	894	1158	3.81717	3.77997	3.99513	3.84805	831.201	899.152	763.251	0.848856	-0.236409	0.0963592	0.191381	NA	NA	0	0	0	0	0	0	0	0	0	0	1
I	1494670	1495830	1161	1	SPAC5D6.10c	SPAC5D6.12	3	4	2	4	-3.22057	-2.51377	-3.85232	-3.37274	3.27014	2.53063	4.00965	1.58445	0.663981	0.814114	0.934642	NA	NA	0	0	0	0	0	0	0	0	0	0	1
I	1495270	1498669	3400	1	SPAC5D6.09c	SPAC5D6.12	194	153	278	454	1.24408	1.19337	1.71626	1.9035	253.419	314.189	192.649	0.613162	-0.70566	0.000194814	0.000739109	NA	NA	0	0	0	0	0	0	0	0	0	0	1
I	1498809	1500084	1276	1	SPAC5D6.08c	NULL	148	105	134	162	2.35492	2.15153	2.1647	1.9181	135.044	130.511	139.576	1.06946	0.0968878	0.61785	0.789344	NA	NA	0	0	0	0	0	0	0	0	0	0	1
I	1500851	1502700	1850	1	SPAC5D6.07c	NULL	343	289	242	445	2.94424	2.98892	2.39419	2.75262	322.057	291.841	352.272	1.20707	0.271504	0.181998	0.32164	NA	NA	0	0	0	0	0	0	0	0	0	0	1
I	1502635	1503758	1124	1	SPAC5D6.06c	NULL	260	216	376	515	3.32371	3.34805	3.80908	3.74255	326.781	388.467	265.094	0.68241	-0.55129	0.00180164	0.00567336	NA	NA	0	0	0	0	0	0	0	0	0	0	1
I	1509574	1511606	2033	1	SPAC5D6.02c	SPAC5D6.01	246	169	313	421	2.32861	2.07879	2.62926	2.53655	274.526	320.539	228.513	0.712903	-0.488222	0.0124431	0.0324639	NA	NA	0	0	0	0	0	0	0	0	0	0	1
I	1512457	1512674	218	1	SPNCRNA.173	NULL	17	10	4	14	1.69477	1.22105	-0.439536	0.847445	11.0019	7.27113	14.7327	2.02619	1.01877	0.266561	0.436168	NA	NA	0	0	0	0	0	0	0	0	0	0	1
I	1521619	1524855	3237	1	SPAC57A7.10c	SPAC57A7.09	9268	7357	10382	14563	6.93974	6.89841	7.05664	7.0245	10043	10852.6	9233.53	0.850815	-0.233083	0.027414	0.0651767	NA	NA	0	0	0	0	0	0	0	0	0	0	1
I	1526345	1527075	731	1	SPNCRNA.174	NULL	1	0	3	0	-4.13799	-16.6096	-2.60005	-16.6096	1.04085	1.58606	0.495642	0.3125	-1.67807	0.892974	0.983897	NA	NA	0	0	0	0	0	0	0	0	0	0	1
I	1529856	1531247	1392	1	SPAC57A7.07c	c("SPAC57A7.08", "SPAC57A7.06")	901	748	911	1125	4.74792	4.77125	4.71699	4.50103	907.154	895.985	918.322	1.02493	0.0355255	0.724832	0.867919	NA	NA	0	0	0	0	0	0	0	0	0	0	1
I	1533565	1534417	853	1	SPNCRNA.744	c("SPAC57A7.06", "SPAC57A7.05")	7	15	14	13	-1.55352	-0.162197	-0.600396	-1.22766	12.5597	12.1897	12.9297	1.06071	0.085029	1	1	NA	NA	0	0	0	0	0	0	0	0	0	0	1
I	1540606	1545221	4616	1	SPAC57A7.04c	SPAC57A7.05	32579	24200	31946	43855	8.19471	8.05759	8.11955	8.05629	32225.9	33041.8	31410	0.950614	-0.0730682	0.542363	0.725246	NA	NA	0	0	0	0	0	0	0	0	0	0	1
I	1546286	1550081	3796	1	SPAC167.07c	SPAC167.05	1276	1035	1211	1791	3.84193	3.83175	3.71964	3.76385	1292.54	1299.89	1285.19	0.988696	-0.0164018	0.857563	0.962409	NA	NA	0	0	0	0	0	0	0	0	0	0	1
I	1550050	1550889	840	1	SPAC167.06c	SPAC167.05	317	245	138	214	3.96958	3.88969	2.72291	2.83549	231.706	151.778	311.635	2.05323	1.0379	2.64439e-07	1.55237e-06	NA	NA	0	0	0	0	0	0	0	0	0	0	1
I	1554993	1557929	2937	1	SPAC167.03c	SPAC167.02	1353	1267	2494	3371	4.2573	4.45437	5.09275	5.0071	2014.9	2560.13	1469.68	0.574064	-0.800718	5.74219e-12	5.57229e-11	NA	NA	0	0	0	0	0	0	0	0	0	0	1
I	1557902	1559475	1574	1	SPAC167.09	c("SPAC167.02", "SPAC167.01")	453	342	499	662	3.66845	3.55475	3.76112	3.64855	473.928	507.638	440.219	0.86719	-0.205579	0.220062	0.375444	NA	NA	0	0	0	0	0	0	0	0	0	0	1
I	1559881	1561967	2087	1	SPNCRNA.555	SPAC167.01	24	16	3	10	-1.06674	-1.35988	-4.11337	-2.89691	13.6277	5.26919	21.9863	4.17261	2.06095	0.0105605	0.0280274	NA	NA	0	0	0	0	0	0	0	0	0	0	1
I	1563479	1563593	115	1	SPRRNA.53	NULL	0	5	0	1	-16.6096	1.14374	-16.6096	-2.03716	1.76086	0.368314	3.1534	8.56173	3.0979	0.567388	0.748701	NA	NA	0	0	0	0	0	0	0	0	0	0	1
I	1568838	1569449	612	1	SPAC1705.02	NULL	213	192	183	327	4.60637	4.74844	4.3405	4.65759	221.925	217.188	226.662	1.04362	0.0616005	0.919762	0.999568	NA	NA	0	0	0	0	0	0	0	0	0	0	1
I	1573772	1574466	695	1	SPNCRNA.175	NULL	7	10	4	5	-1.258	-0.451623	-2.11218	-2.3106	6.8663	3.95631	9.7763	2.47106	1.30513	0.266664	0.436168	NA	NA	0	0	0	0	0	0	0	0	0	0	1
I	1575290	1576307	1018	1	SPAC23H4.18c	NULL	910	657	719	1041	5.70736	5.5292	5.32063	5.33417	814.465	763.539	865.391	1.13339	0.18065	0.168519	0.302648	NA	NA	0	0	0	0	0	0	0	0	0	0	1
I	1576712	1578028	1317	1	SPAC23H4.17c	NULL	391	296	462	651	3.69649	3.58673	3.89036	3.86476	432.251	484.025	380.477	0.78607	-0.34727	0.0340549	0.0783733	NA	NA	0	0	0	0	0	0	0	0	0	0	1
I	1578314	1579610	1297	1	SPAC23H4.16c	NULL	748	543	791	1219	4.87662	4.70635	4.9104	5.01399	790.182	867.165	713.2	0.82245	-0.282	0.0396605	0.0897933	NA	NA	0	0	0	0	0	0	0	0	0	0	1
I	1586008	1587570	1563	1	SPAC23H4.13c	c("SPAC23H4.21", "SPAC23H4.12")	474	390	594	862	3.72993	3.74033	4.00865	4.02551	556.213	631.526	480.9	0.761489	-0.393105	0.00784378	0.0214822	NA	NA	0	0	0	0	0	0	0	0	0	0	1
I	1588622	1589730	1109	1	SPAC23H4.11c	SPAC23H4.12	383	300	448	626	3.9371	3.87653	4.11639	4.07869	423.225	467.415	379.035	0.810917	-0.302374	0.06541	0.138018	NA	NA	0	0	0	0	0	0	0	0	0	0	1
I	1589743	1593248	3506	1	SPAC23H4.10c	SPAC23H4.09	1357	1154	2157	3015	4.00608	4.06412	4.62783	4.5906	1825.62	2250.84	1400.39	0.622164	-0.684634	6.86356e-09	4.98127e-08	NA	NA	0	0	0	0	0	0	0	0	0	0	1
I	1595143	1596024	882	1	SPAC23H4.07c	NULL	1543	1111	1611	2341	6.2631	6.08104	6.27847	6.29727	1589.7	1713.93	1465.46	0.855028	-0.225957	0.0696594	0.145703	NA	NA	0	0	0	0	0	0	0	0	0	0	1
I	1599323	1600363	1041	1	SPAC23H4.05c	NULL	163	141	86	98	2.70046	2.7831	1.73114	1.39923	125.639	81.5617	169.716	2.08082	1.05716	2.70745e-05	0.00011784	NA	NA	0	0	0	0	0	0	0	0	0	0	1
I	1600909	1601622	714	1	SPNCRNA.746	SPAC23H4.04	171	121	104	123	3.31356	3.10638	2.54929	2.271	130.676	100.286	161.067	1.60608	0.683543	0.0041529	0.0121559	NA	NA	0	0	0	0	0	0	0	0	0	0	1
I	1603906	1605116	1211	1	SPAC23H4.03c	SPAC23H4.02	5590	4075	6767	9693	7.74998	7.58574	7.97879	7.97685	6244.17	7147.68	5340.66	0.747188	-0.420456	0.000112758	0.000447011	NA	NA	0	0	0	0	0	0	0	0	0	0	1
I	1607776	1611164	3389	1	SPAC23H4.01c	SPNCRNA.747	2843	2356	3942	5813	5.12204	5.14278	5.5467	5.58669	3560.04	4225.09	2894.99	0.685192	-0.545421	5.94564e-07	3.33045e-06	NA	NA	0	0	0	0	0	0	0	0	0	0	1
I	1611275	1612704	1430	1	SPAP27G11.02	SPNCRNA.748	1108	962	1034	1375	5.00743	5.09539	4.86085	4.75168	1104.49	1053.09	1155.89	1.09761	0.134367	0.298573	0.474962	NA	NA	0	0	0	0	0	0	0	0	0	0	1
I	1612816	1614313	1498	1	SPAP27G11.03	SPAP27G11.04c	1046	665	995	1437	4.92435	4.56271	4.80538	4.81531	996.576	1055.31	937.844	0.888692	-0.170245	0.303925	0.48188	NA	NA	0	0	0	0	0	0	0	0	0	0	1
I	1620400	1621506	1107	1	SPNCRNA.749	c("SPAP27G11.06c", "SPAP27G11.07c")	147	92	98	145	2.46272	2.07842	1.8309	1.87574	118.049	105.217	130.882	1.24393	0.314903	0.203831	0.351954	NA	NA	0	0	0	0	0	0	0	0	0	0	1
I	1631283	1631597	315	1	SPAP27G11.16	SPNCRNA.750	160	108	93	197	4.39821	4.12298	3.56858	4.13111	134.571	121.726	147.416	1.21105	0.276263	0.39174	0.578478	NA	NA	0	0	0	0	0	0	0	0	0	0	1
I	1632068	1634832	2765	1	SPAP27G11.12	SPNCRNA.750	6662	4788	5316	7483	6.79877	6.61406	6.4263	6.39922	5944.12	5566.58	6321.66	1.13565	0.183512	0.069512	0.145496	NA	NA	0	0	0	0	0	0	0	0	0	0	1
I	1638339	1641062	2724	1	SPAP27G11.15	c("SPAP27G11.14c", "SPAC343.01c")	279	208	351	482	2.10998	1.97811	2.39433	2.33153	316.281	363.096	269.466	0.742134	-0.430249	0.0184286	0.0460568	NA	NA	0	0	0	0	0	0	0	0	0	0	1
I	1641662	1642932	1271	1	SPAC343.02	NULL	1106	984	1056	1517	5.17487	5.29807	5.06127	5.06352	1142.9	1117.02	1168.77	1.04632	0.0653306	0.67884	0.842339	NA	NA	0	0	0	0	0	0	0	0	0	0	1
I	1643043	1644421	1379	1	SPAC343.03	SPAC343.04c	169	158	204	291	2.64837	2.84309	2.87306	2.86515	199.221	215.031	183.411	0.852951	-0.229465	0.247721	0.410498	NA	NA	0	0	0	0	0	0	0	0	0	0	1
I	1647199	1649410	2212	1	SPAC343.05	NULL	6342	5219	7329	11271	6.95976	6.97041	7.12159	7.22215	7230.44	8026	6434.88	0.801755	-0.318767	0.0018438	0.0057879	NA	NA	0	0	0	0	0	0	0	0	0	0	1
I	1651012	1652981	1970	1	SPAC343.07	SPAC343.08c	63	70	14	20	0.515147	0.958961	-1.7016	-1.70739	45.0705	14.7679	75.3731	5.10386	2.35159	4.64285e-07	2.6289e-06	NA	NA	0	0	0	0	0	0	0	0	0	0	1
I	1653998	1655830	1833	1	SPAC343.09	SPNCRNA.752	4089	3529	4091	5952	6.53303	6.61235	6.48688	6.50743	4303.7	4355.06	4252.35	0.976417	-0.0344303	0.680287	0.843438	NA	NA	0	0	0	0	0	0	0	0	0	0	1
I	1656143	1658395	2253	1	SPAC343.10	SPAC343.11c	3127	2288	3310	4215	5.84842	5.68954	5.88361	5.71195	3147.63	3302.39	2992.87	0.906273	-0.141982	0.276639	0.447424	NA	NA	0	0	0	0	0	0	0	0	0	0	1
I	1665144	1667735	2592	1	SPAC343.21	NULL	213	218	120	179	1.77035	2.09564	0.895677	0.952239	186.215	129.37	243.06	1.87879	0.909805	0.000588104	0.00204685	NA	NA	0	0	0	0	0	0	0	0	0	0	1
I	1667671	1669666	1996	1	SPAC343.12	SPAC343.20	2744	2204	1492	2408	5.83465	5.81031	4.90876	5.07899	2212.88	1675.7	2750.06	1.64114	0.714702	1.74256e-09	1.3426e-08	NA	NA	0	0	0	0	0	0	0	0	0	0	1
I	1670283	1672264	1982	1	SPAC343.13	SPAC343.14c	734	594	659	881	4.04493	4.03143	3.84258	3.74108	705.657	672.888	738.425	1.0974	0.134086	0.323898	0.504486	NA	NA	0	0	0	0	0	0	0	0	0	0	1
I	1673840	1675661	1822	1	SPAC343.15	SPAC343.17c	1303	978	1646	2309	4.8918	4.76968	5.18207	5.15001	1491.64	1720.65	1262.63	0.733807	-0.446527	0.000313418	0.0011516	NA	NA	0	0	0	0	0	0	0	0	0	0	1
I	1675730	1678118	2389	1	SPAC343.16	SPAC343.17c	7509	6169	13662	15799	7.0277	7.03593	7.84432	7.53362	10327.2	13041.9	7612.44	0.583692	-0.776721	0.000183447	0.000699684	NA	NA	0	0	0	0	0	0	0	0	0	0	1
I	1680205	1681471	1267	1	SPAC343.18	NULL	663	492	606	789	4.5028	4.36426	4.32625	4.1866	624.944	610.983	638.905	1.0457	0.0644703	0.579561	0.758428	NA	NA	0	0	0	0	0	0	0	0	0	0	1
I	1681761	1684467	2707	1	SPAC343.19	NULL	1316	1006	1623	2440	4.33495	4.23923	4.5906	4.65845	1521.74	1756.74	1286.73	0.732452	-0.449194	0.000203652	0.000769723	NA	NA	0	0	0	0	0	0	0	0	0	0	1
I	1684601	1688865	4265	1	SPAC824.02	c("SPNCRNA.754", "SPAC824.03c")	1456	1072	2072	3116	3.82495	3.67506	4.28711	4.35542	1820.42	2243.1	1397.74	0.62313	-0.682395	1.01161e-08	7.20675e-08	NA	NA	0	0	0	0	0	0	0	0	0	0	1
I	1690187	1691715	1529	1	SPAC824.04	c("SPAC824.03c", "SPNCRNA.755")	746	615	1063	1598	4.34014	4.35337	4.80418	4.87195	954.088	1150.56	757.617	0.658478	-0.602792	3.66051e-06	1.83699e-05	NA	NA	0	0	0	0	0	0	0	0	0	0	1
I	1691932	1694964	3033	1	SPAC824.05	NULL	1114	896	1327	2136	4.03247	4.01011	4.23804	4.40442	1302.76	1488.28	1117.23	0.750687	-0.413717	0.000580677	0.00202511	NA	NA	0	0	0	0	0	0	0	0	0	0	1
I	1694906	1696484	1579	1	SPAC824.06	NULL	1077	839	1175	1815	4.91788	4.84942	4.99667	5.10361	1176.32	1289.69	1062.95	0.824185	-0.27896	0.0238237	0.0576689	NA	NA	0	0	0	0	0	0	0	0	0	0	1
I	1696422	1697726	1305	1	SPAC824.07	NULL	1762	1368	2416	3076	5.97485	5.90152	6.3834	6.21147	2073.16	2410.24	1736.09	0.720299	-0.473332	8.4631e-05	0.000341827	NA	NA	0	0	0	0	0	0	0	0	0	0	1
I	1697806	1700162	2357	1	SPAC824.08	SPAC824.09c	1694	1354	1980	2885	4.89897	4.86757	5.07718	5.09989	1901.47	2109.38	1693.56	0.80287	-0.316762	0.00659903	0.0183623	NA	NA	0	0	0	0	0	0	0	0	0	0	1
I	1701860	1702271	412	1	SPNCRNA.177	NULL	3	4	3	8	-1.72601	-1.01917	-1.77286	-0.878208	4.27111	4.53257	4.00965	0.884631	-0.176853	0.922456	0.999568	NA	NA	0	0	0	0	0	0	0	0	0	0	1
I	1704582	1704664	83	1	SPATRNALYS.01	NULL	4	3	11	29	1.00045	0.877229	2.41302	3.29121	10.1856	16.4966	3.87461	0.234873	-2.09005	0.0216458	0.0530169	NA	NA	0	0	0	0	0	0	0	0	0	0	1
I	1708728	1710347	1620	1	SPAC664.03	NULL	2159	1896	2834	4016	5.82319	5.9276	6.16881	6.15136	2621.65	2977.44	2265.86	0.761009	-0.394014	0.00039078	0.00140658	NA	NA	0	0	0	0	0	0	0	0	0	0	1
I	1711136	1712043	908	1	SPAC664.05	NULL	21829	22094	38398	44606	9.96289	10.2721	10.7308	10.4267	30741.5	36729.5	24753.6	0.673944	-0.569298	0.0168366	0.0425935	NA	NA	0	0	0	0	0	0	0	0	0	0	1
I	1712784	1713921	1138	1	SPAC664.06	SPAC664.07c	6617	5515	13293	18717	8.22039	8.24939	9.17995	9.15327	10339.7	13921.5	6757.87	0.485425	-1.04268	5.02608e-23	8.5096e-22	NA	NA	0	0	0	0	0	0	0	0	0	0	1
I	1712996	1713071	76	1	SPSNORNA.31	NULL	8356	6679	6737	11519	12.1562	12.1248	11.7986	12.0521	8079.13	7804.36	8353.9	1.07041	0.0981695	0.537196	0.72002	NA	NA	0	0	0	0	0	0	0	0	0	0	1
I	1718920	1721701	2782	1	SPAC664.09	NULL	1626	1309	2036	2876	4.60069	4.57964	4.87824	4.85621	1883.57	2135.67	1631.47	0.763916	-0.388515	0.000979898	0.00325956	NA	NA	0	0	0	0	0	0	0	0	0	0	1
I	1721899	1724902	3004	1	SPAC664.10	NULL	1751	1461	2154	3023	4.61855	4.64915	4.87054	4.83914	2020.75	2252.2	1789.29	0.794464	-0.331946	0.00416006	0.0121739	NA	NA	0	0	0	0	0	0	0	0	0	0	1
I	1725858	1728189	2332	1	SPAC664.11	SPAC664.12c	59029	43408	72042	106871	10.0373	9.88562	10.2778	10.3264	67041.7	77449.6	56633.8	0.731234	-0.451594	1.15612e-05	5.34389e-05	NA	NA	0	0	0	0	0	0	0	0	0	0	1
I	1729505	1729858	354	1	SPAC664.13	SPAC664.12c	113	76	139	294	3.72806	3.44762	3.97997	4.54033	142.855	181.772	103.939	0.571813	-0.806385	0.0257345	0.0617421	NA	NA	0	0	0	0	0	0	0	0	0	0	1
I	1731083	1733268	2186	1	SPAC664.14	SPNCRNA.758	4294	3805	3885	6488	6.34951	6.4669	6.15825	6.37775	4485.79	4443.56	4528.03	1.01901	0.0271654	0.992514	1	NA	NA	0	0	0	0	0	0	0	0	0	0	1
I	1734381	1737307	2927	1	SPAC664.15	NULL	1567	1209	1755	2663	4.47407	4.39169	4.59068	4.6719	1723.91	1908.66	1539.16	0.80641	-0.310415	0.00833308	0.0226108	NA	NA	0	0	0	0	0	0	0	0	0	0	1
I	1746464	1746547	84	1	SPATRNATYR.01	SPAC105.03c	1299	2197	2690	3934	9.32635	10.3763	10.3297	10.3577	2450.28	2871.11	2029.44	0.70685	-0.500524	0.201302	0.348641	NA	NA	0	0	0	0	0	0	0	0	0	0	1
I	1749862	1753167	3306	1	SPAC17A5.01	SPAC17A5.18c	2537	2000	2324	3435	5.01728	4.96597	4.84391	4.88725	2506.31	2493.82	2518.8	1.01002	0.0143803	0.926782	1	NA	NA	0	0	0	0	0	0	0	0	0	0	1
I	1754924	1755748	825	1	SPNCRNA.759	SPAC17A5.02c	13	16	10	20	-0.612304	-0.0209372	-1.03766	-0.558035	14.5937	12.6531	16.5342	1.30673	0.385962	0.709559	0.862274	NA	NA	0	0	0	0	0	0	0	0	0	0	1
I	1756016	1757330	1315	1	SPAC17A5.03	NULL	24184	19058	30847	45453	9.5764	9.52456	9.88062	9.91951	28527.7	33049.3	24006.1	0.726372	-0.461219	6.55153e-06	3.15715e-05	NA	NA	0	0	0	0	0	0	0	0	0	0	1
I	1759484	1760333	850	1	SPNCRNA.556	SPAC17A5.05c	20	23	4	5	-0.0338915	0.459552	-2.40261	-2.60104	14.1874	3.95631	24.4185	6.17204	2.62575	0.00107928	0.00356513	NA	NA	0	0	0	0	0	0	0	0	0	0	1
I	1760784	1761455	672	1	SPAC17A5.19	NULL	236	191	269	369	3.96351	3.95011	4.10547	4.04112	257.778	278.124	237.431	0.853689	-0.228218	0.240299	0.401544	NA	NA	0	0	0	0	0	0	0	0	0	0	1
I	1761552	1764319	2768	1	SPAC17A5.06	SPAC17A5.07c	2852	2225	3144	4692	5.41861	5.35226	5.51239	5.56963	3103.58	3390.32	2816.83	0.830848	-0.267344	0.0154016	0.0393447	NA	NA	0	0	0	0	0	0	0	0	0	0	1
I	1767372	1768645	1274	1	SPAC17A5.08	NULL	4008	3197	3882	5166	7.11413	7.07978	7.02119	6.91308	3978.94	3955.07	4002.82	1.01207	0.0173145	0.824824	0.941715	NA	NA	0	0	0	0	0	0	0	0	0	0	1
I	1770119	1772023	1905	1	SPAC17A5.10	NULL	538	398	461	697	3.55137	3.40835	3.28168	3.35771	509.052	500.439	517.666	1.03442	0.0488289	0.756884	0.894442	NA	NA	0	0	0	0	0	0	0	0	0	0	1
I	1772296	1772369	74	1	SPATRNAILE.01	NULL	3	5	4	8	0.751002	1.77978	1.11918	1.59882	4.85079	5.06125	4.64033	0.916834	-0.125267	0.94638	1	NA	NA	0	0	0	0	0	0	0	0	0	0	1
I	1772925	1774203	1279	1	SPAC17A5.11	SPNCRNA.760	35	37	33	31	0.485187	0.857169	0.353443	-0.257111	34.7735	28.8643	40.6826	1.40944	0.495125	0.271721	0.44233	NA	NA	0	0	0	0	0	0	0	0	0	0	1
I	1774258	1776351	2094	1	SPAC17A5.12	SPNCRNA.761	2144	1658	2446	3517	5.40953	5.33048	5.55279	5.55635	2348.42	2588.52	2108.32	0.814489	-0.296033	0.0103426	0.0275282	NA	NA	0	0	0	0	0	0	0	0	0	0	1
I	1776500	1777371	872	1	SPAC17A5.13	NULL	677	439	771	1144	5.31089	4.97777	5.45161	5.50053	720.693	828.967	612.418	0.738773	-0.436798	0.002608	0.00794378	NA	NA	0	0	0	0	0	0	0	0	0	0	1
I	1778445	1782740	4296	1	SPAC17A5.14	NULL	2981	2357	4943	7404	4.87815	4.83112	5.56088	5.62344	4152.15	5340.29	2964.02	0.555031	-0.849361	8.36319e-15	1.00091e-13	NA	NA	0	0	0	0	0	0	0	0	0	0	1
I	1786379	1790355	3977	1	SPAC17A5.16	NULL	1575	1060	1251	1949	4.22348	3.94401	3.84436	3.96365	1414.19	1379.23	1449.16	1.0507	0.0713524	0.556998	0.738725	NA	NA	0	0	0	0	0	0	0	0	0	0	1
I	1790362	1791399	1038	1	SPAC1610.01	NULL	284	212	320	495	3.50564	3.37563	3.63097	3.73996	312.981	351.495	274.467	0.780856	-0.356872	0.0437979	0.097923	NA	NA	0	0	0	0	0	0	0	0	0	0	1
I	1792464	1795648	3185	1	SPNCRNA.762	c("SPAC1610.02c", "SPAC1610.03c")	775	634	1091	1495	3.33646	3.33856	3.78299	3.71712	955.699	1127.42	783.974	0.695367	-0.524154	7.58601e-05	0.00030921	NA	NA	0	0	0	0	0	0	0	0	0	0	1
I	1796057	1798148	2092	1	SPAC1610.04	NULL	776	544	589	1065	3.94473	3.7241	3.50009	3.83424	715.679	703.65	727.708	1.03419	0.0485027	0.860923	0.965031	NA	NA	0	0	0	0	0	0	0	0	0	0	1
I	1798347	1799015	669	1	SPAC1002.01	NULL	70	57	79	88	2.42795	2.42338	2.5556	2.19089	72.4107	74.1778	70.6437	0.952357	-0.0704253	0.915463	0.997767	NA	NA	0	0	0	0	0	0	0	0	0	0	1
I	1799061	1800053	993	1	SPAC1002.02	SPAC1002.03c	667	532	761	1064	4.80138	4.76693	4.94473	4.9079	730.165	794.215	666.115	0.838708	-0.253759	0.071511	0.14885	NA	NA	0	0	0	0	0	0	0	0	0	0	1
I	1813439	1815920	2482	1	SPNCRNA.763	c("SPAC1002.09c", "SPAC1002.10c")	429	338	227	271	2.84303	2.79089	1.87789	1.61313	322.813	219.825	425.8	1.937	0.953824	4.18384e-08	2.73993e-07	NA	NA	0	0	0	0	0	0	0	0	0	0	1
I	1816490	1818558	2069	1	SPAC1002.11	SPAC1002.12c	798	631	849	1290	4.00101	3.95408	4.04353	4.1267	858.73	923.979	793.482	0.858766	-0.219663	0.0927835	0.185582	NA	NA	0	0	0	0	0	0	0	0	0	0	1
I	1823882	1824630	749	1	SPAC1002.20	SPAC1002.15c	49	44	105	166	1.44138	1.57791	2.49405	2.63449	84.3442	116.652	52.0364	0.446082	-1.16462	0.000120817	0.000476755	NA	NA	0	0	0	0	0	0	0	0	0	0	1
I	1824570	1826248	1679	1	SPAC1002.14	SPAC1002.15c	1721	1383	2263	3163	5.41113	5.3875	5.75926	5.72196	2043.31	2361.39	1725.23	0.730599	-0.452848	0.0001103	0.000438086	NA	NA	0	0	0	0	0	0	0	0	0	0	1
I	1832317	1833811	1495	1	SPAC1002.18	NULL	3238	2716	2960	4476	6.49044	6.52864	6.31408	6.39033	3265.65	3213.48	3317.82	1.03247	0.0460972	0.76231	0.898869	NA	NA	0	0	0	0	0	0	0	0	0	0	1
I	1835270	1837060	1791	1	SPAC1002.19	NULL	8478	7037	3165	3678	7.61844	7.64149	6.15007	5.84642	5834.05	3027.95	8640.15	2.85347	1.51272	2.70017e-44	6.78094e-43	NA	NA	0	0	0	0	0	0	0	0	0	0	1
I	1838515	1840293	1779	1	SPAC1399.05c	SPNCRNA.764	725	539	850	1299	4.17862	4.04274	4.36124	4.45275	813.55	927.822	699.277	0.753676	-0.407984	0.00267925	0.00814221	NA	NA	0	0	0	0	0	0	0	0	0	0	1
I	1840621	1841283	663	1	SPAC1399.04c	NULL	449	363	510	734	4.81319	4.79826	4.95012	4.95504	495.726	539.972	451.48	0.836118	-0.258221	0.0916789	0.183848	NA	NA	0	0	0	0	0	0	0	0	0	0	1
I	1844130	1845339	1210	1	SPNCRNA.178	NULL	104	83	143	219	1.83514	1.80155	2.24771	2.34226	130.078	156.263	103.893	0.664863	-0.588872	0.0174897	0.0440508	NA	NA	0	0	0	0	0	0	0	0	0	0	1
I	1851495	1854651	3157	1	SPAC1399.01c	NULL	301	178	229	321	1.98477	1.5187	1.5435	1.51036	250.374	239.298	261.449	1.09257	0.127725	0.475626	0.663423	NA	NA	0	0	0	0	0	0	0	0	0	0	1
I	1855318	1856904	1587	1	SPAP11E10.01	SPAP11E10.02c	2175	1742	2301	3775	5.8302	5.80174	5.86459	6.05844	2391.78	2606.89	2176.67	0.834967	-0.260209	0.0157645	0.0401862	NA	NA	0	0	0	0	0	0	0	0	0	0	1
I	1860725	1863132	2408	1	SPAPB1A10.02	SPAP11E10.02c	606	439	596	945	3.38504	3.21176	3.31418	3.45882	620.19	663.153	577.228	0.870429	-0.200201	0.162072	0.293486	NA	NA	0	0	0	0	0	0	0	0	0	0	1
I	1861146	1861484	339	1	SPNCRNA.181	NULL	24	15	42	53	1.55531	1.16905	2.31581	2.13105	31.5405	41.7254	21.3556	0.511813	-0.966311	0.0589317	0.12655	NA	NA	0	0	0	0	0	0	0	0	0	0	1
I	1863363	1863762	400	1	SPAPB1A10.03	NULL	235	169	328	402	4.80906	4.62523	5.24324	5.01637	272.266	321.471	223.061	0.693876	-0.527251	0.00773723	0.0212112	NA	NA	0	0	0	0	0	0	0	0	0	0	1
I	1863972	1864457	486	1	SPAPB1A10.16	NULL	837	590	852	1222	6.32968	6.11698	6.30845	6.30841	843.737	900.519	786.954	0.873889	-0.194478	0.174225	0.31085	NA	NA	0	0	0	0	0	0	0	0	0	0	1
I	1866753	1868268	1516	1	SPAPB1A10.05	c("SPNCRNA.765", "SPAPB1A10.06c")	1148	780	747	1092	4.97434	4.70858	4.30754	4.33497	929.027	797.127	1060.93	1.33094	0.412446	0.00135488	0.00439686	NA	NA	0	0	0	0	0	0	0	0	0	0	1
I	1874206	1875627	1422	1	SPNCRNA.766	c("SPNCRNA.767", "SPNCRNA.768")	115	115	102	143	1.74727	2.03909	1.52735	1.49444	118.061	106.595	129.527	1.21514	0.281117	0.323015	0.503504	NA	NA	0	0	0	0	0	0	0	0	0	0	1
I	1875572	1877864	2293	1	SPAPB1A10.08	SPNCRNA.768	1499	1033	740	1354	4.80828	4.56293	3.74302	4.09429	1142.19	889.924	1394.46	1.56694	0.647953	0.000522602	0.00183699	NA	NA	0	0	0	0	0	0	0	0	0	0	1
I	1878009	1880726	2718	1	SPAPB1A10.09	SPAPB1A10.10c	2751	1891	3340	4400	5.41806	5.16907	5.6511	5.52839	2971.26	3386.39	2556.13	0.754824	-0.405788	0.000641383	0.00221878	NA	NA	0	0	0	0	0	0	0	0	0	0	1
I	1887459	1890591	3133	1	SPAPB1A10.13	SPNCRNA.769	1496	1162	2255	3019	4.30905	4.23636	4.85421	4.75479	1889.23	2304.12	1474.33	0.639866	-0.644158	7.87184e-08	4.96551e-07	NA	NA	0	0	0	0	0	0	0	0	0	0	1
I	1890529	1892090	1562	1	SPAPB1A10.14	NULL	610	570	966	1478	4.01897	4.21294	4.63533	4.72852	858.454	1055.08	661.829	0.62728	-0.672818	2.75263e-07	1.61105e-06	NA	NA	0	0	0	0	0	0	0	0	0	0	1
I	1892505	1893846	1342	1	SPAPB1A10.15	NULL	375	320	410	610	3.95757	4.02056	4.03944	4.09227	414.558	441.432	387.683	0.87824	-0.187313	0.223313	0.379588	NA	NA	0	0	0	0	0	0	0	0	0	0	1
I	1895436	1896752	1317	1	SPAC140.01	NULL	5197	4223	5839	7392	7.35591	7.34831	7.47709	7.29698	5524.39	5809.57	5239.21	0.901825	-0.149081	0.19875	0.345316	NA	NA	0	0	0	0	0	0	0	0	0	0	1
I	1897448	1899491	2044	1	SPAC140.02	SPNCRNA.770	6287	3134	8315	12720	6.99646	6.28391	7.35295	7.4459	7086.81	9080.97	5092.65	0.560805	-0.834429	0.00113248	0.00372242	NA	NA	0	0	0	0	0	0	0	0	0	0	1
I	1899904	1901605	1702	1	SPAC140.03	SPNCRNA.771	732	657	1186	1648	4.31943	4.4553	4.96876	4.92301	1005.58	1234	777.167	0.629794	-0.667048	2.51314e-07	1.48463e-06	NA	NA	0	0	0	0	0	0	0	0	0	0	1
I	1901612	1901982	371	1	SPNCRNA.182	SPNCRNA.771	1	1	0	0	-3.15966	-2.86787	-16.6096	-16.6096	0.563161	0	1.12632	Inf	Inf	0.69034	0.850227	NA	NA	0	0	0	0	0	0	0	0	0	0	1
I	1902075	1903841	1767	1	SPAC140.04	c("SPNCRNA.772", "SPNCRNA.557")	275	264	508	737	2.69169	2.92461	3.53023	3.5467	421.41	540.019	302.801	0.560723	-0.834641	1.80542e-07	1.08633e-06	NA	NA	0	0	0	0	0	0	0	0	0	0	1
I	1905755	1911747	5993	1	SPAC110.01	SPAC110.05	1635	980	2816	4152	3.5015	3.05488	4.239	4.27879	2223.23	3018.02	1428.44	0.473305	-1.07916	9.06436e-16	1.15141e-14	NA	NA	0	0	0	0	0	0	0	0	0	0	1
I	1911836	1915897	4062	1	SPAC110.02	SPNCRNA.773	1219	980	1732	2361	3.63899	3.61596	4.09888	4.02547	1503.76	1785.27	1222.25	0.684632	-0.546599	8.52792e-06	4.02151e-05	NA	NA	0	0	0	0	0	0	0	0	0	0	1
I	1916054	1917656	1603	1	SPAC110.03	NULL	3884	3079	4706	7126	7.31867	7.27541	7.54877	7.627	4489.77	5112.6	3866.94	0.756355	-0.402865	0.000169299	0.000649286	NA	NA	0	0	0	0	0	0	0	0	0	0	1
I	1920876	1921644	769	1	SPNCRNA.774	NULL	165	109	93	174	3.15497	2.84865	2.28095	2.66437	131.89	113.254	150.525	1.32909	0.410438	0.1113	0.215979	NA	NA	0	0	0	0	0	0	0	0	0	0	1
I	1922552	1924915	2364	1	SPAP14E8.02	NULL	4866	4121	8151	11229	6.48381	6.53589	7.1812	7.12302	6727.97	8445.11	5010.83	0.593341	-0.753067	1.65264e-12	1.67129e-11	NA	NA	0	0	0	0	0	0	0	0	0	0	1
I	1924893	1926539	1647	1	SPAP14E8.03	NULL	893	767	1104	1543	4.60435	4.67673	4.86351	4.82614	1039.16	1151.98	926.34	0.804131	-0.314498	0.0136346	0.0352053	NA	NA	0	0	0	0	0	0	0	0	0	0	1
I	1926604	1927914	1311	1	SPAP14E8.04	SPAP14E8.05c	247	197	233	362	2.9674	2.9329	2.83636	2.95166	251.59	256.513	246.668	0.961617	-0.0564652	0.737266	0.87766	NA	NA	0	0	0	0	0	0	0	0	0	0	1
I	1935015	1935958	944	1	SPAC3H1.03	NULL	358	288	421	497	3.97666	3.95458	4.16366	3.88273	382.352	405.629	359.076	0.885233	-0.175871	0.355757	0.540024	NA	NA	0	0	0	0	0	0	0	0	0	0	1
I	1938279	1940537	2259	1	SPAC3H1.05	c("SPAC3H1.04c", "SPAC3H1.06c")	4327	3299	4671	6601	6.35858	6.25906	6.42209	6.40068	4562.99	4900.73	4225.26	0.862169	-0.213957	0.0541827	0.117999	NA	NA	0	0	0	0	0	0	0	0	0	0	1
I	1943705	1943994	290	1	SPNCRNA.775	SPAC3H1.06c	69	47	88	80	3.3041	3.04198	3.60815	2.95029	69.9154	75.9894	63.8413	0.840134	-0.251309	0.638445	0.806814	NA	NA	0	0	0	0	0	0	0	0	0	0	1
I	1944127	1945368	1242	1	SPAC3H1.07	SPAC3H1.06c	30447	25470	35409	60137	9.99105	10.0254	10.162	10.4058	36011.9	40869.5	31154.2	0.762286	-0.391596	0.00432657	0.0125998	NA	NA	0	0	0	0	0	0	0	0	0	0	1
I	1945459	1946363	905	1	SPNCRNA.776	SPAC3H1.08c	25	23	16	52	0.197579	0.369098	-0.493125	0.686941	27.254	27.6113	26.8967	0.97412	-0.0378285	0.847135	0.956003	NA	NA	0	0	0	0	0	0	0	0	0	0	1
I	1949244	1951508	2265	1	SPAC3H1.10	c("SPAC3H1.09c", "SPNCRNA.777")	331	254	316	415	2.60088	2.51069	2.48712	2.35994	322.083	319.915	324.25	1.01355	0.0194203	0.865392	0.967962	NA	NA	0	0	0	0	0	0	0	0	0	0	1
I	1952384	1953655	1272	1	SPNCRNA.778	SPNCRNA.777	34	41	24	44	0.150078	0.711976	-0.399273	-0.0451705	35.802	28.8943	42.7097	1.47814	0.563782	0.28558	0.45861	NA	NA	0	0	0	0	0	0	0	0	0	0	1
I	1953735	1954811	1077	1	SPNCRNA.779	SPNCRNA.780	271	263	154	156	3.38483	3.63342	2.52262	2.02087	219.531	138.875	300.188	2.16158	1.11208	2.75567e-05	0.000119635	NA	NA	0	0	0	0	0	0	0	0	0	0	1
I	1954820	1956332	1513	1	SPNCRNA.781	SPNCRNA.782	238	172	91	132	2.70711	2.53037	1.27323	1.28947	161.584	96.7278	226.44	2.341	1.22713	9.87186e-08	6.14636e-07	NA	NA	0	0	0	0	0	0	0	0	0	0	1
I	1956501	1956988	488	1	SPNCRNA.784	SPNCRNA.783	25	19	13	15	1.08861	0.984496	0.0983445	-0.215564	18.3858	12.3976	24.374	1.96602	0.975279	0.120174	0.230001	NA	NA	0	0	0	0	0	0	0	0	0	0	1
I	1957461	1961546	4086	1	SPAC3H1.11	c("SPNCRNA.783", "SPAC3H1.12c")	3457	2058	2088	3069	5.13432	4.67785	4.36006	4.39535	2622.81	2234.25	3011.37	1.34782	0.430632	0.052174	0.114267	NA	NA	0	0	0	0	0	0	0	0	0	0	1
I	1965083	1966458	1376	1	SPAC3H1.13	SPAC3H1.12c	328	257	343	554	3.45111	3.39099	3.46876	3.64008	355.02	385.385	324.655	0.842419	-0.247391	0.128933	0.243466	NA	NA	0	0	0	0	0	0	0	0	0	0	1
I	1966787	1967969	1183	1	SPAC3H1.14	NULL	302	247	343	512	3.40566	3.40743	3.54246	3.60003	337.689	369.916	305.462	0.825761	-0.276204	0.103034	0.202557	NA	NA	0	0	0	0	0	0	0	0	0	0	1
I	1968833	1973575	4743	1	SPAC9G1.02	c("SPAC9G1.14", "SPAC9G1.03c")	5298	4276	7608	10850	5.53513	5.51776	6.01035	6.00209	6670.57	8018.44	5322.7	0.663807	-0.591164	2.84437e-08	1.9011e-07	NA	NA	0	0	0	0	0	0	0	0	0	0	1
I	1975212	1976603	1392	1	SPAC9G1.04	NULL	1042	828	890	1274	5.11176	5.07192	4.83742	4.83455	989.212	939.762	1038.66	1.10524	0.14436	0.273343	0.443826	NA	NA	0	0	0	0	0	0	0	0	0	0	1
I	1976706	1979209	2504	1	SPAC9G1.05	SPAC9G1.06c	3633	3065	4708	6648	6.14444	6.19098	6.47154	6.44898	4335.65	4937.6	3733.7	0.756178	-0.403203	0.000184461	0.000702945	NA	NA	0	0	0	0	0	0	0	0	0	0	1
I	1982975	1984542	1568	1	SPAC9G1.07	SPAC9G1.08c	1206	897	1382	1867	4.99679	4.86155	5.14646	5.06006	1290.87	1418.29	1163.46	0.820332	-0.28572	0.0282334	0.0668215	NA	NA	0	0	0	0	0	0	0	0	0	0	1
I	1985662	1991234	5573	1	SPAC9G1.09	c("SPAC9G1.08c", "SPAC9G1.10c")	572	424	573	848	2.10569	1.96555	2.06136	2.10652	583.091	615.267	550.916	0.895409	-0.159381	0.289027	0.462906	NA	NA	0	0	0	0	0	0	0	0	0	0	1
I	1993568	1996196	2629	1	SPAC9G1.12	SPAC9G1.13c	2651	2113	4757	5658	5.38751	5.35208	6.18417	5.91404	3622.73	4598.88	2646.57	0.575483	-0.797155	1.00612e-05	4.6921e-05	NA	NA	0	0	0	0	0	0	0	0	0	0	1
I	1999135	2000466	1332	1	SPNCRNA.785	c("SPAC767.01c", "SPNCRNA.786")	120	115	94	156	1.903	2.13341	1.50384	1.71429	119.579	107.153	132.005	1.23193	0.300918	0.31188	0.489771	NA	NA	0	0	0	0	0	0	0	0	0	0	1
I	2000656	2004811	4156	1	SPAC17H9.01	SPNCRNA.786	2609	1910	2378	3503	4.70379	4.54568	4.52318	4.56166	2522.57	2547.42	2497.73	0.980495	-0.0284178	0.831583	0.945021	NA	NA	0	0	0	0	0	0	0	0	0	0	1
I	2004745	2008108	3364	1	SPAC17H9.02	SPAC17H9.03c	2740	2233	3259	4579	5.07948	5.0761	5.28288	5.25312	3087.93	3409.49	2766.37	0.811372	-0.301565	0.0068421	0.0189858	NA	NA	0	0	0	0	0	0	0	0	0	0	1
I	2012859	2016204	3346	1	SPAC17H9.05	c("SPNCRNA.787", "SPAC17H9.06c")	3534	2783	5997	8028	5.45435	5.4015	6.17043	6.07087	4817.07	6127.35	3506.78	0.572316	-0.805115	2.45712e-13	2.66444e-12	NA	NA	0	0	0	0	0	0	0	0	0	0	1
I	2016297	2017627	1331	1	SPAC17H9.07	SPAC17H9.06c	1564	1153	1885	2578	5.91371	5.76567	6.13618	6.0675	1724.22	1946.08	1502.36	0.77199	-0.373345	0.00243843	0.00747089	NA	NA	0	0	0	0	0	0	0	0	0	0	1
I	2017807	2020483	2677	1	SPAC17H9.08	SPAC17H9.09c	694	502	812	1047	3.42788	3.25244	3.60756	3.45391	737.747	814.917	660.577	0.810607	-0.302926	0.0427081	0.0956828	NA	NA	0	0	0	0	0	0	0	0	0	0	1
I	2025054	2026052	999	1	SPAC17H9.11	SPAC17H9.12c	1245	1011	1065	1472	5.69307	5.68453	5.42093	5.36749	1179.95	1105.21	1254.69	1.13525	0.183016	0.145995	0.270035	NA	NA	0	0	0	0	0	0	0	0	0	0	1
I	2026716	2027164	449	1	SPNCRNA.788	SPAC17H9.12c	35	30	12	24	1.6942	1.76362	0.103033	0.582666	25.7258	15.1838	36.2679	2.3886	1.25616	0.0258914	0.0620732	NA	NA	0	0	0	0	0	0	0	0	0	0	1
I	2030502	2030865	364	1	SPNCRNA.184	NULL	12	11	6	3	0.452663	0.618945	-0.594182	-2.1145	8.58112	4.27705	12.8852	3.01263	1.59102	0.0890788	0.179293	NA	NA	0	0	0	0	0	0	0	0	0	0	1
I	2031074	2032221	1148	1	SPAC17H9.16	SPAC17H9.17c	1543	1290	1471	2013	5.88087	5.91432	5.76507	5.69726	1548.73	1519.11	1578.35	1.039	0.0551921	0.654044	0.821164	NA	NA	0	0	0	0	0	0	0	0	0	0	1
I	2036327	2040544	4218	1	SPAC17H9.20	SPAC607.02c	931	627	1050	1434	3.27631	2.99781	3.40299	3.33229	970.08	1083.28	856.879	0.791003	-0.338244	0.0155442	0.0396837	NA	NA	0	0	0	0	0	0	0	0	0	0	1
I	2041681	2041861	181	1	SPNCRNA.185	NULL	3	2	0	0	-0.539378	-0.832522	-16.6096	-16.6096	1.37414	0	2.74829	Inf	Inf	0.234215	0.394167	NA	NA	0	0	0	0	0	0	0	0	0	0	1
I	2042399	2043469	1071	1	SPAC607.04	SPNCRNA.789	991	780	1051	1365	5.26348	5.20989	5.30143	5.15821	1020.75	1058.4	983.112	0.928869	-0.106453	0.46626	0.654389	NA	NA	0	0	0	0	0	0	0	0	0	0	1
I	2043745	2045159	1415	1	SPAC607.05	SPAC607.06c	2938	2042	2973	4316	6.48565	6.25261	6.45588	6.47329	2952.73	3161.42	2744.05	0.867978	-0.20427	0.0845418	0.1716	NA	NA	0	0	0	0	0	0	0	0	0	0	1
I	2052650	2053768	1119	1	SPNCRNA.186	NULL	155	123	160	221	2.52362	2.48182	2.52256	2.46818	160.193	165.987	154.398	0.930182	-0.104414	0.671448	0.837149	NA	NA	0	0	0	0	0	0	0	0	0	0	1
I	2052799	2057177	4379	1	SPAC607.10	SPNCRNA.790	1497	901	1383	2039	3.82696	3.3863	3.66583	3.70553	1396.19	1482.16	1310.22	0.883991	-0.177897	0.400024	0.587602	NA	NA	0	0	0	0	0	0	0	0	0	0	1
I	2057515	2058739	1225	1	SPAC732.01	NULL	463	459	918	1306	4.65671	4.936	5.59733	5.58556	742.658	966.351	518.965	0.537035	-0.896911	6.95098e-11	6.02017e-10	NA	NA	0	0	0	0	0	0	0	0	0	0	1
I	2066217	2067343	1127	1	SPNCRNA.791	SPAC3C7.03c	14	6	1	1	-0.955404	-1.88596	-4.80924	-5.32943	5.81004	0.896999	10.7231	11.9544	3.57947	0.00956926	0.0256634	NA	NA	0	0	0	0	0	0	0	0	0	0	1
I	2068565	2071624	3060	1	SPAC3C7.04	NULL	2995	2376	4300	6074	5.34451	5.3023	5.81943	5.79738	3746.71	4510.49	2982.94	0.661336	-0.596545	6.96773e-08	4.44424e-07	NA	NA	0	0	0	0	0	0	0	0	0	0	1
I	2083407	2084941	1535	1	SPAC3C7.09	NULL	273	196	277	427	2.88422	2.69799	2.85835	2.96234	281.32	303.716	258.924	0.852519	-0.230195	0.216683	0.370561	NA	NA	0	0	0	0	0	0	0	0	0	0	1
I	2084966	2086433	1468	1	SPAC3C7.10	SPAC3C7.11c	1343	1122	1609	2208	5.24709	5.27952	5.46094	5.39715	1518.58	1663.89	1373.27	0.825337	-0.276945	0.0223114	0.0544805	NA	NA	0	0	0	0	0	0	0	0	0	0	1
I	2089237	2091311	2075	1	SPAC3C7.12	SPAC3C7.13c	1729	1362	2164	3102	5.11231	5.05991	5.38922	5.38835	2001.27	2286.58	1715.95	0.750443	-0.414185	0.000405872	0.00145609	NA	NA	0	0	0	0	0	0	0	0	0	0	1
I	2093398	2095721	2324	1	SPNCRNA.793	c("SPNCRNA.792", "SPAC3C7.14c", "SPNCRNA.794")	182	104	135	211	1.70089	1.18535	1.22306	1.34698	152.442	149.087	155.798	1.04501	0.0635213	0.74624	0.885478	NA	NA	0	0	0	0	0	0	0	0	0	0	1
I	2102190	2104103	1914	1	SPAC25A8.02	SPAC631.01c	1231	890	830	1275	4.73873	4.56259	4.12322	4.22217	1039.92	908.409	1171.44	1.28955	0.36687	0.00458702	0.0132777	NA	NA	0	0	0	0	0	0	0	0	0	0	1
I	2105472	2110519	5048	1	SPAC631.02	SPAC631.01c	4514	3108	4390	6525	5.36911	5.1225	5.28207	5.33346	4460.83	4724.18	4197.48	0.888511	-0.170538	0.13739	0.25693	NA	NA	0	0	0	0	0	0	0	0	0	0	1
I	2111393	2113866	2474	1	SPAC20H4.01	SPNCRNA.795	2926	2308	4863	6761	5.61757	5.5671	6.30363	6.25866	3983.51	5061.17	2905.86	0.574148	-0.800505	4.88429e-13	5.17028e-12	NA	NA	0	0	0	0	0	0	0	0	0	0	1
I	2113811	2114930	1120	1	SPAC20H4.02	c("SPNCRNA.795", "SPAC20H4.03c")	1514	1197	1191	1574	5.81035	5.76322	5.4173	5.2992	1357.36	1209.39	1505.33	1.2447	0.315797	0.00861827	0.0233004	NA	NA	0	0	0	0	0	0	0	0	0	0	1
I	2116487	2120279	3793	1	SPAC20H4.04	SPAC20H4.05c	1164	906	1597	2223	3.68961	3.61992	4.09903	4.05581	1405.7	1663.07	1148.32	0.690483	-0.534321	1.70218e-05	7.66717e-05	NA	NA	0	0	0	0	0	0	0	0	0	0	1
I	2122490	2124506	2017	1	SPAC20H4.07	SPNCRNA.796	665	522	677	924	3.8443	3.78681	3.82325	3.75162	678.53	698.242	658.817	0.943537	-0.083849	0.587248	0.763327	NA	NA	0	0	0	0	0	0	0	0	0	0	1
I	2124684	2125978	1295	1	SPAC20H4.08	SPNCRNA.796	671	477	950	1320	4.42692	4.22641	4.88168	4.83585	810.918	988.425	633.41	0.640828	-0.641992	4.40435e-06	2.17909e-05	NA	NA	0	0	0	0	0	0	0	0	0	0	1
I	2126067	2128359	2293	1	SPAC20H4.09	SPNCRNA.797	851	695	1109	1599	4.18369	4.18336	4.51886	4.52641	1017.68	1175.25	860.114	0.731859	-0.450362	0.00048831	0.00172605	NA	NA	0	0	0	0	0	0	0	0	0	0	1
I	2128433	2131713	3281	1	SPAC20H4.10	c("SPNCRNA.797", "SPAC20H4.11c")	4374	3290	4556	6815	5.84771	5.72866	5.85967	5.92025	4580.81	4918.75	4242.88	0.862593	-0.213249	0.0493333	0.10872	NA	NA	0	0	0	0	0	0	0	0	0	0	1
I	2133203	2136010	2808	1	SPAC23C11.01	SPAC23C11.02c	906	699	1123	1613	3.88201	3.7996	4.14492	4.14695	1038.85	1187.8	889.897	0.749195	-0.416586	0.00138691	0.00449473	NA	NA	0	0	0	0	0	0	0	0	0	0	1
I	2135951	2138028	2078	1	SPAC23C11.03	SPAC23C11.04c	3664	2783	6577	9328	6.19371	6.08874	6.99086	6.97464	5242.01	6912.79	3571.22	0.51661	-0.952854	2.69087e-18	3.85917e-17	NA	NA	0	0	0	0	0	0	0	0	0	0	1
I	2140379	2141698	1320	1	SPAC23C11.05	SPAC23C11.06c	27905	21879	34297	49699	9.7774	9.71824	10.0281	10.0429	32033.3	36437.1	27629.5	0.75828	-0.399198	0.000100343	0.000400703	NA	NA	0	0	0	0	0	0	0	0	0	0	1
I	2141671	2143567	1897	1	SPNCRNA.798	SPAC23C11.06c	378	383	470	627	3.04822	3.359	3.31564	3.21109	454.159	479.415	428.903	0.894639	-0.160622	0.342121	0.524757	NA	NA	0	0	0	0	0	0	0	0	0	0	1
I	2144894	2145226	333	1	SPAC23C11.07	NULL	12	10	9	16	0.581078	0.609858	0.119189	0.428898	11.4528	10.6512	12.2545	1.15053	0.202298	0.887387	0.982675	NA	NA	0	0	0	0	0	0	0	0	0	0	1
I	2145681	2146388	708	1	SPAC23C11.08	NULL	388	337	328	530	5.52007	5.60858	5.23085	5.40279	386.732	368.615	404.848	1.0983	0.135267	0.505601	0.688705	NA	NA	0	0	0	0	0	0	0	0	0	0	1
I	2147100	2150190	3091	1	SPAC23C11.09	SPNCRNA.799	9810	7806	14234	21333	7.04166	7.00381	7.53182	7.59521	12583.9	15382.5	9785.34	0.636133	-0.6526	3.13776e-10	2.59942e-09	NA	NA	0	0	0	0	0	0	0	0	0	0	1
I	2150624	2151601	978	1	SPAC23C11.10	NULL	407	279	204	268	4.40413	4.15118	3.36081	3.23411	292.123	206.56	377.686	1.82846	0.870628	1.10505e-06	5.95644e-06	NA	NA	0	0	0	0	0	0	0	0	0	0	1
I	2152042	2154223	2182	1	SPAC23C11.11	SPNCRNA.800	4203	3478	6268	8803	6.59091	6.60957	7.12064	7.09027	5416.38	6556.07	4276.69	0.652326	-0.616336	9.90494e-09	7.0647e-08	NA	NA	0	0	0	0	0	0	0	0	0	0	1
I	2154795	2155037	243	1	SPAC23C11.12	NULL	95	76	100	127	4.02053	3.99041	4.04767	3.87214	97.331	99.6444	95.0177	0.953568	-0.0685923	0.862477	0.966232	NA	NA	0	0	0	0	0	0	0	0	0	0	1
I	2157794	2158195	402	1	SPNCRNA.187	NULL	21	11	2	11	1.11676	0.475689	-2.32235	-0.383335	11.2274	5.10882	17.346	3.3953	1.76354	0.0488825	0.107845	NA	NA	0	0	0	0	0	0	0	0	0	0	1
I	2158659	2160086	1428	1	SPAC23C11.14	NULL	2887	2371	2921	4470	6.39106	6.3988	6.3611	6.45455	3058.46	3190.65	2926.26	0.917136	-0.124793	0.223921	0.380137	NA	NA	0	0	0	0	0	0	0	0	0	0	1
I	2160354	2164078	3725	1	SPAC23C11.15	NULL	3307	2556	3917	5578	5.25261	5.17279	5.44998	5.43962	3688.21	4125.31	3251.11	0.788087	-0.343573	0.00199339	0.00621362	NA	NA	0	0	0	0	0	0	0	0	0	0	1
I	2164162	2166765	2604	1	SPAC23C11.16	NULL	1722	1363	1843	2668	4.77884	4.73336	4.82996	4.8433	1835.07	1957.03	1713.11	0.875364	-0.192044	0.101737	0.200449	NA	NA	0	0	0	0	0	0	0	0	0	0	1
I	2167170	2168987	1818	1	SPAC23C11.17	NULL	4052	2669	2952	4273	6.57691	6.26638	6.07311	6.0863	3413.06	3134.48	3691.63	1.17775	0.236029	0.0721878	0.150103	NA	NA	0	0	0	0	0	0	0	0	0	0	1
I	2176803	2179225	2423	1	SPNCRNA.801	c("SPAC13F5.03c", "SPAC13F5.04c")	59	43	107	124	0.0155633	-0.148999	0.827525	0.519894	79.3012	102.24	56.3621	0.551272	-0.859165	0.0085829	0.0232204	NA	NA	0	0	0	0	0	0	0	0	0	0	1
I	2179175	2181507	2333	1	SPAC13F5.05	c("SPAC13F5.04c", "SPAC13F5.06c")	556	459	543	865	3.30646	3.32168	3.22547	3.37685	585.363	605.668	565.059	0.932953	-0.100124	0.432221	0.61899	NA	NA	0	0	0	0	0	0	0	0	0	0	1
I	2184495	2185764	1270	1	SPNCRNA.802	c("SPAC13F5.06c", "SPAC13F5.07c")	74	72	30	50	1.27433	1.52662	-0.0750783	0.141522	58.1814	34.2762	82.0865	2.39485	1.25994	0.00078838	0.00267035	NA	NA	0	0	0	0	0	0	0	0	0	0	1
I	2187113	2190744	3632	1	SPAC1783.01	SPAC1783.02c	1398	967	1051	1674	3.99809	3.75812	3.53963	3.6908	1237.49	1172.21	1302.78	1.11139	0.152363	0.223737	0.38004	NA	NA	0	0	0	0	0	0	0	0	0	0	1
I	2190850	2193879	3030	1	SPAC1783.03	c("SPAC1783.02c", "SPAC1783.04c")	648	498	788	1047	3.15023	3.0622	3.38558	3.27521	718.742	802.229	635.255	0.791863	-0.336678	0.0203607	0.0503108	NA	NA	0	0	0	0	0	0	0	0	0	0	1
I	2194820	2199471	4652	1	SPAC1783.05	c("SPNCRNA.803", "SPAC1783.06c")	7222	5765	11406	15482	6.01003	5.97677	6.6225	6.54294	9473.91	11732.4	7215.4	0.614997	-0.701349	4.08649e-11	3.63365e-10	NA	NA	0	0	0	0	0	0	0	0	0	0	1
I	2199428	2200071	644	1	SPNCRNA.804	SPAC1783.06c	28	17	32	46	0.851931	0.423855	0.997719	1.00092	29.23	33.8604	24.5995	0.7265	-0.460966	0.400013	0.587602	NA	NA	0	0	0	0	0	0	0	0	0	0	1
I	2215635	2217134	1500	1	SPAC18G6.03	c("SPNCRNA.805", "SPAC18G6.04c")	2800	2706	4451	6209	6.6643	6.90685	7.28615	7.24602	3867.23	4640.04	3094.42	0.666895	-0.584468	1.31419e-06	6.9927e-06	NA	NA	0	0	0	0	0	0	0	0	0	0	1
I	2228049	2228781	733	1	SPNCRNA.188	NULL	80	94	28	23	2.17975	2.70422	0.618324	-0.185825	61.1049	23.2744	98.9353	4.25082	2.08774	6.75005e-05	0.000277833	NA	NA	0	0	0	0	0	0	0	0	0	0	1
I	2228922	2230058	1137	1	SPAC18G6.06	SPAC18G6.07c	1214	988	1870	2765	5.47002	5.46465	6.04643	6.09031	1615.93	2007.03	1224.82	0.610266	-0.71249	2.80472e-09	2.1082e-08	NA	NA	0	0	0	0	0	0	0	0	0	0	1
I	2234262	2236773	2512	1	SPAC18G6.10	SPAC18G6.11c	1790	1294	2680	3766	4.88661	4.7103	5.42203	5.39246	2253.62	2803.95	1703.3	0.607465	-0.719127	9.70343e-10	7.64304e-09	NA	NA	0	0	0	0	0	0	0	0	0	0	1
I	2241013	2241357	345	1	SPAC18G6.13	SPNCRNA.806	73	75	117	116	3.13486	3.46567	3.76854	3.2358	94.0317	104.581	83.4829	0.798264	-0.325063	0.387143	0.573982	NA	NA	0	0	0	0	0	0	0	0	0	0	1
I	2243558	2245220	1663	1	SPAC18G6.15	NULL	3533	2848	5200	7236	6.5156	6.49647	7.02637	6.98268	4480.78	5414.28	3547.28	0.655171	-0.610057	2.4023e-08	1.62555e-07	NA	NA	0	0	0	0	0	0	0	0	0	0	1
I	2245497	2247128	1632	1	SPAC13D6.01	SPNCRNA.807	423	333	191	385	3.42757	3.37425	2.23364	2.72456	331.226	242.78	419.673	1.72862	0.789618	3.7688e-05	0.000160428	NA	NA	0	0	0	0	0	0	0	0	0	0	1
I	2248603	2249009	407	1	SPNCRNA.189	NULL	54	35	72	88	2.46149	2.1277	2.82967	2.59882	59.6577	70.477	48.8385	0.692971	-0.529133	0.170712	0.305764	NA	NA	0	0	0	0	0	0	0	0	0	0	1
I	2253359	2254440	1082	1	SPAC13D6.05	SPAC13D6.04c	2229	1781	1933	3159	6.41818	6.38629	6.16577	6.35403	2206.74	2185.45	2228.03	1.01948	0.0278356	0.922115	0.999568	NA	NA	0	0	0	0	0	0	0	0	0	0	1
I	2254437	2255856	1420	1	SPAC4G9.02	SPAC4G9.04c	768	664	1298	1819	4.48877	4.57066	5.19903	5.16552	1077.81	1356.2	799.425	0.589461	-0.762532	2.949e-09	2.2111e-08	NA	NA	0	0	0	0	0	0	0	0	0	0	1
I	2255837	2256730	894	1	SPAC4G9.03	SPAC4G9.04c	7444	6416	10887	16303	8.43322	8.51063	8.93482	8.99698	9748.21	11760.4	7736	0.6578	-0.604279	4.53988e-09	3.33926e-08	NA	NA	0	0	0	0	0	0	0	0	0	0	1
I	2259353	2262602	3250	1	SPAC4G9.05	SPAC4G9.06c	116	69	82	113	0.641018	0.183379	0.0937372	0.036002	92.9915	84.9717	101.011	1.18877	0.249465	0.338433	0.520773	NA	NA	0	0	0	0	0	0	0	0	0	0	1
I	2262789	2265404	2616	1	SPAC4G9.07	NULL	102	93	41	79	0.694772	0.853318	-0.666943	-0.241083	79.9908	50.7729	109.209	2.15093	1.10496	0.00071775	0.00245536	NA	NA	0	0	0	0	0	0	0	0	0	0	1
I	2273765	2275516	1752	1	SPAC4G9.10	SPAC4G9.11c	3309	2549	2197	2989	6.29288	6.20823	5.65516	5.57893	2755.05	2262.41	3247.68	1.4355	0.52155	2.91337e-06	1.47936e-05	NA	NA	0	0	0	0	0	0	0	0	0	0	1
I	2276859	2278109	1251	1	SPAC4G9.12	SPAC4G9.13c	1089	1252	2552	2393	5.23545	5.7285	6.41722	5.80405	1779.97	2230.58	1329.37	0.595973	-0.746681	0.0962273	0.191212	NA	NA	0	0	0	0	0	0	0	0	0	0	1
I	2280203	2281847	1645	1	SPAC4G9.14	NULL	798	551	635	851	4.69493	4.45241	4.31844	4.22048	696.089	649.15	743.027	1.14462	0.194863	0.12803	0.242065	NA	NA	0	0	0	0	0	0	0	0	0	0	1
I	2282196	2283537	1342	1	SPAC4G9.15	SPAC4G9.16c	2455	1905	2773	4039	6.36904	6.29492	6.4979	6.52009	2685.96	2953.66	2418.25	0.818728	-0.288544	0.0107926	0.0285803	NA	NA	0	0	0	0	0	0	0	0	0	0	1
I	2285750	2286566	817	1	SPNCRNA.809	SPAC4G9.17c	144	103	171	198	2.87122	2.67961	3.07229	2.76343	149.832	163.331	136.333	0.834699	-0.260672	0.342326	0.524808	NA	NA	0	0	0	0	0	0	0	0	0	0	1
I	2287135	2288483	1349	1	SPAC4G9.19	SPAC4G9.20c	344	288	228	351	3.40408	3.43955	2.76385	2.86592	300.978	249.818	352.137	1.40957	0.495256	0.00783064	0.021456	NA	NA	0	0	0	0	0	0	0	0	0	0	1
I	2291666	2292778	1113	1	SPAC4G9.22	SPAC13G7.01c	779	579	793	1315	4.86073	4.72448	4.83957	5.04888	827.425	903.58	751.269	0.831436	-0.266323	0.0413329	0.0929486	NA	NA	0	0	0	0	0	0	0	0	0	0	1
I	2297820	2298939	1120	1	SPNCRNA.811	SPAC13G7.02c	9	7	11	19	-1.58383	-1.65458	-1.34119	-1.07306	10.8445	12.8135	8.87554	0.692671	-0.529758	0.547954	0.730524	NA	NA	0	0	0	0	0	0	0	0	0	0	1
I	2298875	2300068	1194	1	SPAC13G7.03	NULL	340	283	299	467	3.7014	3.72848	3.46915	3.59207	338.54	330.079	347.001	1.05126	0.0721258	0.751132	0.889122	NA	NA	0	0	0	0	0	0	0	0	0	0	1
I	2303557	2304248	692	1	SPNCRNA.190	NULL	40	21	48	62	1.26279	0.624997	1.47897	1.32784	40.6412	48.2124	33.07	0.685923	-0.543881	0.255066	0.420291	NA	NA	0	0	0	0	0	0	0	0	0	0	1
I	2305136	2307359	2224	1	SPAC13G7.05	NULL	753	530	620	982	3.81305	3.59821	3.48581	3.62891	698.474	689.469	707.479	1.02612	0.0372016	0.800645	0.925174	NA	NA	0	0	0	0	0	0	0	0	0	0	1
I	2307438	2308878	1441	1	SPAC13G7.06	NULL	4677	3692	3834	5486	7.074	7.02463	6.74041	6.73695	4347.07	4047.55	4646.59	1.148	0.199124	0.0679865	0.142602	NA	NA	0	0	0	0	0	0	0	0	0	0	1
I	2308863	2310294	1432	1	SPAC13G7.07	SPAC13G7.08c	295	203	558	739	3.34165	3.09423	4.21435	4.09929	420.716	567.19	274.243	0.483511	-1.04838	4.3815e-10	3.56822e-09	NA	NA	0	0	0	0	0	0	0	0	0	0	1
I	2313645	2315160	1516	1	SPAC13G7.10	NULL	1501	1147	2229	2730	5.50618	5.40994	6.0298	5.80194	1825.64	2183.94	1467.35	0.671883	-0.573719	8.42634e-05	0.000340457	NA	NA	0	0	0	0	0	0	0	0	0	0	1
I	2315095	2316369	1275	1	SPAC13G7.11	SPAC13G7.12c	948	742	1054	1586	5.11194	5.05029	5.218	5.28716	1039.61	1141.38	937.834	0.821666	-0.283376	0.0261765	0.0626191	NA	NA	0	0	0	0	0	0	0	0	0	0	1
I	2322853	2325632	2780	1	SPNCRNA.812	SPAC6C3.02c	293	272	315	421	2.12938	2.3139	2.18697	2.08508	319.182	321.596	316.768	0.984988	-0.0218221	0.877332	0.97559	NA	NA	0	0	0	0	0	0	0	0	0	0	1
I	2325854	2327280	1427	1	SPNCRNA.813	c("SPAC6C3.03c", "SPNCRNA.57")	211	208	187	246	2.61782	2.88897	2.39676	2.27201	212.616	189.469	235.762	1.24433	0.315367	0.140279	0.261233	NA	NA	0	0	0	0	0	0	0	0	0	0	1
I	2327767	2330289	2523	1	SPAC6C3.04	c("SPAC6C3.03c", "SPNCRNA.814")	5986	4285	4476	6664	7.15882	6.96834	6.69258	6.7464	5245.11	4820.84	5669.38	1.17601	0.233906	0.0267497	0.063825	NA	NA	0	0	0	0	0	0	0	0	0	0	1
I	2330833	2332240	1408	1	SPAC6C3.05	SPAC6C3.06c	196	143	102	171	2.53077	2.36774	1.54163	1.76669	152.12	116.908	187.333	1.6024	0.680238	0.00429386	0.0125166	NA	NA	0	0	0	0	0	0	0	0	0	0	1
I	2336034	2337768	1735	1	SPAC6C3.07	SPNCRNA.815	81	78	67	96	0.954622	1.19199	0.634007	0.632518	80.0601	70.78	89.3401	1.26222	0.335965	0.313307	0.491626	NA	NA	0	0	0	0	0	0	0	0	0	0	1
I	2338103	2339312	1210	1	SPAC6C3.08	NULL	794	604	693	1040	4.94239	4.83961	4.69925	4.76455	761.948	749.425	774.471	1.03342	0.047426	0.746671	0.885716	NA	NA	0	0	0	0	0	0	0	0	0	0	1
I	2339836	2341304	1469	1	SPAC6C3.09	SPAC17G8.01c	3074	2403	3166	4323	6.7099	6.64644	6.70559	6.6346	3152.58	3266.04	3039.13	0.930524	-0.103884	0.381933	0.569107	NA	NA	0	0	0	0	0	0	0	0	0	0	1
I	2344065	2346044	1980	1	SPAC17G8.02	c("SPNCRNA.816", "SPAC17G8.03c")	685	566	725	1099	3.84416	3.86067	3.87918	3.95896	742.277	788.074	696.48	0.883775	-0.178249	0.174848	0.311822	NA	NA	0	0	0	0	0	0	0	0	0	0	1
I	2348008	2348451	444	1	SPAC17G8.15	SPAC17G8.04c	58	49	57	92	3.43905	3.48759	3.3671	3.53741	61.8353	64.0199	59.6506	0.93175	-0.101985	0.7466	0.885716	NA	NA	0	0	0	0	0	0	0	0	0	0	1
I	2350014	2351244	1231	1	SPAC17G8.05	SPAC17G8.06c	455	342	744	952	4.07593	3.95587	4.73851	4.5738	592.593	743.977	441.21	0.593043	-0.753792	6.65908e-07	3.70072e-06	NA	NA	0	0	0	0	0	0	0	0	0	0	1
I	2354127	2355211	1085	1	SPAC17G8.07	NULL	753	533	544	757	4.84851	4.64181	4.33261	4.28894	637.895	566.418	709.371	1.25238	0.324672	0.0190824	0.0475633	NA	NA	0	0	0	0	0	0	0	0	0	0	1
I	2357302	2358388	1087	1	SPAC17G8.09	SPAC17G8.10c	472	375	667	832	4.4205	4.38042	4.87254	4.67108	564.759	659.07	470.448	0.713806	-0.486396	0.00161184	0.00514299	NA	NA	0	0	0	0	0	0	0	0	0	0	1
I	2362324	2362771	448	1	SPNCRNA.817	NULL	66	55	58	86	2.61253	2.64131	2.37926	2.42718	64.8693	62.3387	67.3998	1.08119	0.112615	0.783256	0.913985	NA	NA	0	0	0	0	0	0	0	0	0	0	1
I	2362396	2362641	246	1	SPNCRNA.77	NULL	46	42	38	50	2.95653	3.1171	2.63404	2.50961	43.8969	38.5057	49.2881	1.28002	0.356166	0.404135	0.592481	NA	NA	0	0	0	0	0	0	0	0	0	0	1
I	2362411	2362747	337	1	SPNCRNA.59	NULL	54	50	45	64	2.73377	2.91455	2.42388	2.41166	52.8308	47.3629	58.2987	1.23089	0.299705	0.461495	0.648611	NA	NA	0	0	0	0	0	0	0	0	0	0	1
I	2362643	2362753	111	1	SPNCRNA.78	NULL	10	9	7	15	1.903	2.04281	1.34157	1.92074	9.92902	9.2255	10.6325	1.15252	0.204787	0.928505	1	NA	NA	0	0	0	0	0	0	0	0	0	0	1
I	2363316	2367055	3740	1	SPAC17G8.12	SPAC17G8.13c	787	510	896	1201	3.12688	2.79283	3.26716	3.16947	813.882	916.047	711.717	0.776944	-0.364117	0.0131797	0.0342296	NA	NA	0	0	0	0	0	0	0	0	0	0	1
I	2369680	2370799	1120	1	SPNCRNA.818	SPAC17G8.14c	8	9	14	13	-1.75375	-1.29202	-0.993271	-1.62053	10.9155	12.1897	9.64126	0.790937	-0.338366	0.75294	0.890648	NA	NA	0	0	0	0	0	0	0	0	0	0	1
I	2370710	2371361	652	1	SPNCRNA.192	SPNCRNA.819	8	7	15	15	-0.973215	-0.874048	-0.113193	-0.633549	10.9174	13.455	8.3799	0.62281	-0.683136	0.470683	0.658902	NA	NA	0	0	0	0	0	0	0	0	0	0	1
I	2371726	2372900	1175	1	SPAC22H10.02	NULL	483	390	621	854	4.36804	4.3513	4.68375	4.62303	564.107	642.854	485.36	0.755009	-0.405434	0.0069727	0.0192947	NA	NA	0	0	0	0	0	0	0	0	0	0	1
I	2375519	2376190	672	1	SPNCRNA.820	SPAC22H10.03c	9	16	21	34	-0.846882	0.274993	0.32864	0.503422	19.0884	23.6251	14.5517	0.615942	-0.699134	0.222101	0.378224	NA	NA	0	0	0	0	0	0	0	0	0	0	1
I	2376661	2378678	2018	1	SPAC22H10.04	SPAC22H10.05c	476	409	474	629	3.42481	3.49777	3.37188	3.25969	488.07	482.266	493.874	1.02407	0.0343128	0.829247	0.943891	NA	NA	0	0	0	0	0	0	0	0	0	0	1
I	2381690	2382200	511	1	SPAC22H10.13	NULL	808	672	464	912	6.03652	6.06244	5.18943	5.64398	702.754	581.212	824.296	1.41824	0.504098	0.0184319	0.0460568	NA	NA	0	0	0	0	0	0	0	0	0	0	1
I	2382470	2385153	2684	1	SPAC22H10.07	NULL	1472	1096	2236	3160	4.53765	4.40394	5.09394	5.07258	1883.41	2346.01	1420.81	0.605628	-0.723496	1.46384e-09	1.13882e-08	NA	NA	0	0	0	0	0	0	0	0	0	0	1
I	2385703	2387654	1952	1	SPAC22H10.08	NULL	970	830	1645	2398	4.40858	4.47552	5.12376	5.14714	1378.57	1752.9	1004.24	0.572899	-0.803646	5.79561e-11	5.07074e-10	NA	NA	0	0	0	0	0	0	0	0	0	0	1
I	2387588	2389909	2322	1	SPAC22H10.09	NULL	2229	1533	2087	3141	5.31651	5.06829	5.17469	5.24412	2165.93	2260.24	2071.62	0.916548	-0.125717	0.308195	0.485891	NA	NA	0	0	0	0	0	0	0	0	0	0	1
I	2389917	2391943	2027	1	SPAC22H10.10	NULL	673	509	637	916	3.91041	3.79929	3.78424	3.78794	664.366	674.148	654.583	0.970979	-0.0424883	0.789803	0.917615	NA	NA	0	0	0	0	0	0	0	0	0	0	1
I	2398986	2400719	1734	1	SPAC15F9.02	c("SPNCRNA.822", "SPAC15F9.03c")	3105	2422	3178	4875	6.29726	6.23068	6.28393	6.38085	3271.08	3475.69	3066.48	0.882264	-0.180718	0.092323	0.184823	NA	NA	0	0	0	0	0	0	0	0	0	0	1
I	2404749	2405441	693	1	SPNCRNA.823	SPAC1B9.02c	50	56	39	51	1.58263	2.03795	1.17733	1.04399	49.7515	39.4027	60.1002	1.52528	0.609074	0.133601	0.250546	NA	NA	0	0	0	0	0	0	0	0	0	0	1
I	2406661	2408084	1424	1	SPAC1B9.03c	NULL	1931	1504	3402	4476	5.93968	5.87095	6.70986	6.58532	2676.39	3447.16	1905.63	0.552811	-0.855142	1.36032e-13	1.50361e-12	NA	NA	0	0	0	0	0	0	0	0	0	0	1
I	2416132	2416772	641	1	SPAC6B12.18	SPAC6B12.04c	615	492	1087	1401	5.31575	5.28563	6.09058	5.93633	852.902	1090.69	615.115	0.563969	-0.826312	1.98926e-09	1.52387e-08	NA	NA	0	0	0	0	0	0	0	0	0	0	1
I	2416876	2418250	1375	1	SPNCRNA.824	SPAC6B12.04c	16	23	24	29	-1.0497	-0.234339	-0.511604	-0.758944	22.9027	23.3696	22.4359	0.960049	-0.0588196	0.910108	0.994985	NA	NA	0	0	0	0	0	0	0	0	0	0	1
I	2424735	2425515	781	1	SPNCRNA.194	SPNCRNA.825	1	2	1	2	-4.23342	-2.94177	-4.28027	-3.80071	1.51116	1.26531	1.757	1.38859	0.473622	1	1	NA	NA	0	0	0	0	0	0	0	0	0	0	1
I	2425757	2427967	2211	1	SPAC6B12.08	c("SPNCRNA.825", "SPAC6B12.19")	1025	781	798	1176	4.35661	4.25619	3.94859	3.98765	927.811	855.028	1000.59	1.17025	0.226814	0.0871543	0.176276	NA	NA	0	0	0	0	0	0	0	0	0	0	1
I	2427902	2429090	1189	1	SPAC6B12.09	SPAC6B12.10c	938	882	1094	1484	5.0334	5.2364	5.20849	5.12801	1073.07	1124.96	1021.17	0.907741	-0.139647	0.257655	0.423916	NA	NA	0	0	0	0	0	0	0	0	0	0	1
I	2430775	2432838	2064	1	SPAC6B12.11	SPNCRNA.43	1164	843	1093	1410	4.61785	4.44417	4.48019	4.32723	1102.88	1097.18	1108.59	1.0104	0.0149326	0.787919	0.91658	NA	NA	0	0	0	0	0	0	0	0	0	0	1
I	2433048	2433119	72	1	SPATRNATHR.02	NULL	0	2	0	0	-16.6096	0.497384	-16.6096	-16.6096	0.63068	0	1.26136	Inf	Inf	0.67744	0.841038	NA	NA	0	0	0	0	0	0	0	0	0	0	1
I	2433332	2435623	2292	1	SPAC6B12.12	SPAC6B12.14c	10020	8072	12090	17577	7.50369	7.48362	7.72776	7.74728	11461.4	12865.7	10057.2	0.781708	-0.355299	0.000598507	0.00208125	NA	NA	0	0	0	0	0	0	0	0	0	0	1
I	2435833	2437020	1188	1	SPAC6B12.13	SPAC6B12.14c	1321	1186	982	1386	5.83151	5.9678	5.35682	5.33359	1216.19	1029.65	1402.73	1.36233	0.446081	0.000556646	0.0019481	NA	NA	0	0	0	0	0	0	0	0	0	0	1
I	2438820	2439389	570	1	SPNCRNA.195	NULL	22	11	17	19	0.680107	-0.0280733	0.261285	-0.0986092	16.9136	15.9856	17.8416	1.1161	0.158472	0.768438	0.903549	NA	NA	0	0	0	0	0	0	0	0	0	0	1
I	2439437	2441027	1591	1	SPAC6B12.15	SPNCRNA.826	39956	31533	57332	86765	10.5055	10.4558	10.9796	11.057	50979.2	62267.3	39691.1	0.637431	-0.649659	1.7058e-10	1.43896e-09	NA	NA	0	0	0	0	0	0	0	0	0	0	1
I	2440336	2440418	83	1	SPSNORNA.11	NULL	10521	9081	14737	21104	12.3614	12.4409	12.8007	12.7985	13253	15564.1	10941.9	0.703018	-0.508367	7.25459e-07	4.0168e-06	NA	NA	0	0	0	0	0	0	0	0	0	0	1
I	2441963	2442037	75	1	SPATRNALYS.03	NULL	1	4	1	5	-0.853308	1.43849	-0.900163	0.901383	2.69431	2.37025	3.01836	1.27343	0.348725	1	1	NA	NA	0	0	0	0	0	0	0	0	0	0	1
I	2442589	2443829	1241	1	SPAC6B12.16	SPNCRNA.827	23	26	3	8	-0.249413	0.219274	-3.23475	-2.34014	16.165	4.53257	27.7975	6.13283	2.61655	0.00066929	0.00230469	NA	NA	0	0	0	0	0	0	0	0	0	0	1
I	2445220	2447714	2495	1	SPAC32A11.01	NULL	542	486	788	1036	3.25796	3.39244	3.75101	3.6254	686.663	798.177	575.149	0.720578	-0.472774	0.00082919	0.00279674	NA	NA	0	0	0	0	0	0	0	0	0	0	1
I	2450314	2451737	1424	1	SPNCRNA.828	SPAC32A11.02c	25	17	6	25	-0.456373	-0.720948	-2.56206	-1.02358	17.7463	12.38	23.1126	1.86694	0.900675	0.22189	0.378025	NA	NA	0	0	0	0	0	0	0	0	0	0	1
I	2459475	2462176	2702	1	SPNCRNA.829	c("SPAC19A8.15", "SPAC19A8.14", "SPAC19A8.13")	136	130	99	146	1.06314	1.28986	0.558183	0.598288	127.755	106.114	149.396	1.40788	0.493529	0.0620785	0.132149	NA	NA	0	0	0	0	0	0	0	0	0	0	1
I	2462251	2467428	5178	1	SPAC19A8.11c	c("SPAC19A8.13", "SPAC19A8.12", "SPAC19A8.10")	1261	1002	1670	2450	3.37291	3.33304	3.73134	3.76391	1521.11	1785.27	1256.95	0.704064	-0.506222	2.81415e-05	0.000121953	NA	NA	0	0	0	0	0	0	0	0	0	0	1
I	2474084	2474170	87	1	SPNCRNA.286	NULL	0	0	0	0	-16.6096	-16.6096	-16.6096	-16.6096	0	0	0	NA	NA	NA	NA	NA	NA	0	0	0	0	0	0	0	0	0	0	1
I	2474620	2475765	1146	1	SPAC19A8.07c	NULL	869	821	1737	2264	4.97631	5.18615	5.92862	5.79053	1350.35	1752.19	948.502	0.541324	-0.885436	2.24938e-11	2.05335e-10	NA	NA	0	0	0	0	0	0	0	0	0	0	1
I	2477864	2480031	2168	1	SPAC19A8.05c	NULL	961	719	814	1175	4.20173	4.075	3.91537	3.92456	896.445	863.119	929.771	1.07722	0.107317	0.405665	0.593637	NA	NA	0	0	0	0	0	0	0	0	0	0	1
I	2490084	2494363	4280	1	SPAC19A8.01c	NULL	1555	954	2083	2750	3.91479	3.50175	4.28968	4.17009	1743.25	2114.11	1372.39	0.649157	-0.62336	0.000254083	0.000945446	NA	NA	0	0	0	0	0	0	0	0	0	0	1
I	2495902	2496323	422	1	SPNCRNA.558	SPAC23H3.03c	1	0	0	2	-3.34547	-16.6096	-16.6096	-2.91272	0.616135	0.736627	0.495642	0.672853	-0.571636	1	1	NA	NA	0	0	0	0	0	0	0	0	0	0	1
I	2499035	2500236	1202	1	SPAC23H3.04	NULL	235	157	325	465	3.19944	2.90935	3.62036	3.61679	279.291	343.089	215.493	0.628096	-0.670942	0.0004425	0.00157386	NA	NA	0	0	0	0	0	0	0	0	0	0	1
I	2502790	2506036	3247	1	SPAC23H3.06	SPAC23H3.07c	1629	887	1207	1725	4.40275	3.81759	3.92334	3.91814	1320.14	1273.46	1366.81	1.0733	0.102059	0.620194	0.79158	NA	NA	0	0	0	0	0	0	0	0	0	0	1
I	2510538	2510610	73	1	SPATRNACYS.02	NULL	9	32	11	17	2.35559	4.47747	2.59824	2.70591	18.3597	12.0769	24.6425	2.04047	1.0289	0.526085	0.708133	NA	NA	0	0	0	0	0	0	0	0	0	0	1
I	2511048	2512846	1799	1	SPAC23H3.10	NULL	1690	1435	2367	3014	5.28531	5.34115	5.72449	5.55275	2052.08	2361.5	1742.66	0.737948	-0.438409	0.00021482	0.000808876	NA	NA	0	0	0	0	0	0	0	0	0	0	1
I	2519010	2521358	2349	1	SPNCRNA.197	SPAC23H3.13c	226	175	237	304	1.99784	1.92068	2.01954	1.85837	229.825	237.266	222.384	0.937279	-0.0934503	0.701338	0.858245	NA	NA	0	0	0	0	0	0	0	0	0	0	1
I	2519375	2521586	2212	1	SPNCRNA.831	NULL	280	226	318	426	2.39363	2.37634	2.53038	2.43184	303.169	325.024	281.314	0.865517	-0.208366	0.263683	0.432176	NA	NA	0	0	0	0	0	0	0	0	0	0	1
I	2521520	2523453	1934	1	SPAC23H3.14	SPAC23H3.15c	1448	1080	1879	2429	5.09397	4.96275	5.42302	5.27305	1643.43	1888.03	1398.82	0.740889	-0.43267	0.000541529	0.00189851	NA	NA	0	0	0	0	0	0	0	0	0	0	1
I	2523434	2525232	1799	1	SPNCRNA.832	SPAC23H3.15c	125	87	158	274	1.52829	1.29727	1.81943	2.09332	150.637	184.45	116.824	0.633366	-0.65889	0.00466115	0.0134728	NA	NA	0	0	0	0	0	0	0	0	0	0	1
I	2525778	2527510	1733	1	SPAC25H1.02	NULL	772	588	714	991	4.20889	4.10792	4.04935	4.00195	747.978	742.48	753.476	1.01481	0.0212082	0.84477	0.95459	NA	NA	0	0	0	0	0	0	0	0	0	0	1
I	2528030	2528644	615	1	SPAC25H1.03	SPNCRNA.833	96	71	113	181	2.82346	2.68006	3.01182	3.17112	109.383	126.406	92.3599	0.73066	-0.452728	0.089972	0.180908	NA	NA	0	0	0	0	0	0	0	0	0	0	1
I	2529085	2529901	817	1	SPAC25H1.04	SPNCRNA.833	352	255	493	789	4.16072	3.98746	4.59988	4.75796	443.265	551.241	335.289	0.608244	-0.717277	6.9686e-06	3.3367e-05	NA	NA	0	0	0	0	0	0	0	0	0	0	1
I	2530096	2531201	1106	1	SPAC25H1.05	NULL	1122	906	1326	1797	5.39621	5.37953	5.59036	5.50851	1245.2	1362.9	1127.51	0.827287	-0.27354	0.031659	0.0737358	NA	NA	0	0	0	0	0	0	0	0	0	0	1
I	2531225	2532877	1653	1	SPAC25H1.06	SPAC25H1.10c	1097	816	2108	2956	4.78396	4.64885	5.67942	5.64683	1630.78	2203.2	1058.35	0.480371	-1.05778	6.22975e-18	8.76693e-17	NA	NA	0	0	0	0	0	0	0	0	0	0	1
I	2533709	2536655	2947	1	SPAC25H1.07	SPAC25H1.08c	8768	6267	8236	11629	6.94849	6.75583	6.81133	6.78867	8467.82	8637.37	8298.26	0.960739	-0.0577833	0.658197	0.825084	NA	NA	0	0	0	0	0	0	0	0	0	0	1
I	2538102	2540081	1980	1	SPAC25H1.09	SPAC4A8.02c	179	144	31	47	1.90802	1.88594	-0.668437	-0.588408	106.619	33.7	179.538	5.32754	2.41347	2.43849e-16	3.19908e-15	NA	NA	0	0	0	0	0	0	0	0	0	0	1
I	2542866	2544911	2046	1	SPNCRNA.834	SPAC4A8.03c	122	94	65	92	1.30764	1.2233	0.352417	0.333249	94.0009	68.2494	119.752	1.75463	0.811165	0.00480024	0.0138026	NA	NA	0	0	0	0	0	0	0	0	0	0	1
I	2544815	2546981	2167	1	SPAC4A8.04	NULL	2648	2270	1947	3049	5.66469	5.73429	5.17418	5.3009	2448.22	2152.34	2744.1	1.27494	0.35043	0.00372319	0.0109892	NA	NA	0	0	0	0	0	0	0	0	0	0	1
I	2547093	2547449	357	1	SPNCRNA.835	SPAC4A8.05c	7	3	1	6	-0.296923	-1.22749	-3.15102	-1.08652	4.05005	2.73857	5.36154	1.95779	0.969225	0.591302	0.765425	NA	NA	0	0	0	0	0	0	0	0	0	0	1
I	2547383	2552168	4786	1	SPNCRNA.836	SPAC4A8.05c	262	250	136	190	1.18431	1.40848	0.191499	0.15353	214.705	141.881	287.528	2.02655	1.01902	1.13196e-06	6.07969e-06	NA	NA	0	0	0	0	0	0	0	0	0	0	1
I	2553840	2555738	1899	1	SPNCRNA.837	SPAC4A8.06c	196	130	216	317	2.09917	1.79865	2.1925	2.22558	205.043	230.952	179.134	0.775636	-0.366548	0.0906854	0.182038	NA	NA	0	0	0	0	0	0	0	0	0	0	1
I	2558542	2561108	2567	1	SPNCRNA.838	SPAC4A8.08c	264	205	209	285	2.09401	2.02091	1.71012	1.63722	237.802	215.465	260.139	1.20734	0.271831	0.157421	0.286903	NA	NA	0	0	0	0	0	0	0	0	0	0	1
I	2563655	2566870	3216	1	SPAC4A8.10	c("SPAC4A8.09c", "SPNCRNA.839", "SPAC4A8.11c")	1556	1344	1817	2539	4.43705	4.51755	4.61391	4.57625	1757.31	1895.77	1618.85	0.853929	-0.227812	0.0494592	0.108957	NA	NA	0	0	0	0	0	0	0	0	0	0	1
I	2576259	2577995	1737	1	SPAC4A8.14	NULL	3161	2591	3655	5153	6.27458	6.27952	6.43721	6.41239	3515.54	3830.27	3200.82	0.835665	-0.259004	0.0183765	0.0459501	NA	NA	0	0	0	0	0	0	0	0	0	0	1
I	2578426	2578524	99	1	SPATRNAILE.02	NULL	918	1008	654	1131	8.58848	9.01522	8.05242	8.32229	926.524	762.323	1090.73	1.43079	0.516813	0.135961	0.254535	NA	NA	0	0	0	0	0	0	0	0	0	0	1
I	2583804	2584233	430	1	SPAC823.02	SPNCRNA.840	1747	1336	2933	4444	7.53144	7.43629	8.23208	8.3112	2447.95	3187.42	1708.48	0.536006	-0.89968	4.83543e-15	5.90483e-14	NA	NA	0	0	0	0	0	0	0	0	0	0	1
I	2585172	2587474	2303	1	SPAC823.03	NULL	2150	1603	1532	2240	5.30605	5.17431	4.77028	4.798	1855.79	1634.97	2076.61	1.27012	0.344968	0.00322598	0.00964499	NA	NA	0	0	0	0	0	0	0	0	0	0	1
I	2587696	2588620	925	1	SPAC823.04	NULL	635	563	1381	1863	4.98739	5.10559	6.06142	5.97297	1043.04	1416.28	669.806	0.472932	-1.0803	1.52393e-16	2.02136e-15	NA	NA	0	0	0	0	0	0	0	0	0	0	1
I	2590238	2590780	543	1	SPAC823.06	NULL	103	80	115	153	2.97718	2.90442	3.08931	2.98085	109.328	117.151	101.506	0.866452	-0.206808	0.475259	0.663215	NA	NA	0	0	0	0	0	0	0	0	0	0	1
I	2591413	2592545	1133	1	SPAC823.07	SPAC823.08c	974	677	1111	1612	5.15733	4.92438	5.30034	5.31697	1045.41	1181.09	909.726	0.770242	-0.376617	0.00469983	0.013565	NA	NA	0	0	0	0	0	0	0	0	0	0	1
I	2597443	2597985	543	1	SPNCRNA.199	SPAC823.10c	9	16	5	11	-0.539378	0.5825	-1.43421	-0.817085	10.6233	6.69488	14.5517	2.17355	1.12005	0.262503	0.430771	NA	NA	0	0	0	0	0	0	0	0	0	0	1
I	2598197	2600285	2089	1	SPAC823.11	NULL	1775	1435	2478	3616	5.21708	5.20212	5.65158	5.67643	2213.35	2641.91	1784.79	0.67557	-0.565823	8.71819e-07	4.76563e-06	NA	NA	0	0	0	0	0	0	0	0	0	0	1
I	2601069	2604177	3109	1	SPAC823.12	SPAC823.13c	1912	1436	1745	2498	4.67412	4.5529	4.49541	4.49259	1847.96	1842.6	1853.32	1.00582	0.00836968	0.914502	0.997206	NA	NA	0	0	0	0	0	0	0	0	0	0	1
I	2605757	2607414	1658	1	SPAC823.14	SPNCRNA.841	1972	1656	2874	3769	5.92969	5.96954	6.42623	6.29699	2464.71	2907.62	2021.81	0.695351	-0.524188	5.53626e-06	2.69932e-05	NA	NA	0	0	0	0	0	0	0	0	0	0	1
I	2607670	2609360	1691	1	SPAC823.15	c("SPNCRNA.841", "SPAC823.16c")	1208	999	1561	2154	5.00563	5.02338	5.32863	5.27281	1423.71	1618.63	1228.79	0.759153	-0.397537	0.00119497	0.00390974	NA	NA	0	0	0	0	0	0	0	0	0	0	1
I	2610966	2613002	2037	1	SPAC7D4.14c	SPAC823.16c	1051	833	1391	1829	4.4208	4.37724	4.77831	4.65288	1227.66	1409.05	1046.28	0.742542	-0.429456	0.000839996	0.00282921	NA	NA	0	0	0	0	0	0	0	0	0	0	1
I	2613107	2614473	1367	1	SPAC7D4.13c	NULL	685	489	792	1107	4.45671	4.26225	4.61925	4.58197	737.18	826.442	647.918	0.783984	-0.351104	0.0151451	0.0387389	NA	NA	0	0	0	0	0	0	0	0	0	0	1
I	2614749	2617595	2847	1	SPAC7D4.12c	NULL	590	474	959	1286	3.10483	3.08082	3.75879	3.66172	786.016	980.661	591.371	0.603033	-0.72969	1.61877e-07	9.81894e-07	NA	NA	0	0	0	0	0	0	0	0	0	0	1
I	2617856	2620433	2578	1	SPAC7D4.11c	SPAC7D4.10	1301	1032	1398	1970	4.38885	4.34649	4.44574	4.42021	1380.19	1464.68	1295.69	0.884625	-0.176863	0.154565	0.282705	NA	NA	0	0	0	0	0	0	0	0	0	0	1
I	2621697	2622420	724	1	SPNCRNA.842	SPAC7D4.10	3	7	4	4	-2.53931	-1.02516	-2.17115	-2.69149	4.74484	3.588	5.90169	1.64484	0.717949	0.684391	0.846428	NA	NA	0	0	0	0	0	0	0	0	0	0	1
I	2622360	2623585	1226	1	SPAC7D4.09c	NULL	279	242	296	433	3.30116	3.38772	3.33964	3.36805	303.44	315.971	290.909	0.920683	-0.119224	0.473688	0.661642	NA	NA	0	0	0	0	0	0	0	0	0	0	1
I	2625316	2625855	540	1	SPAC7D4.07c	SPAC7D4.08	8213	6569	7368	11115	9.30236	9.27194	9.09887	9.17167	8101.4	7989.16	8213.65	1.0281	0.0399789	0.757815	0.895355	NA	NA	0	0	0	0	0	0	0	0	0	0	1
I	2626416	2628282	1867	1	SPAC7D4.06c	SPSNORNA.12	842	711	1178	1435	4.22666	4.2745	4.66425	4.4286	1008.53	1151.32	865.744	0.751957	-0.411278	0.00588167	0.0165619	NA	NA	0	0	0	0	0	0	0	0	0	0	1
I	2633757	2637156	3400	1	SPAC7D4.03c	NULL	2169	1570	2640	3770	4.72698	4.55253	4.96363	4.9573	2424.74	2784.27	2065.22	0.741743	-0.431008	0.0002268	0.000849455	NA	NA	0	0	0	0	0	0	0	0	0	0	1
I	2637653	2639631	1979	1	SPAC7D4.02c	SPAC4F8.15	547	326	511	638	3.78001	3.32516	3.63494	3.43481	490.93	505.142	476.718	0.94373	-0.0835541	0.857613	0.962409	NA	NA	0	0	0	0	0	0	0	0	0	0	1
I	2643512	2645254	1743	1	SPAC4F8.14c	SPNCRNA.843	5595	4161	7591	10911	7.24798	7.11258	7.64127	7.64433	6714.65	8031.92	5397.38	0.671991	-0.573487	1.0173e-07	6.32075e-07	NA	NA	0	0	0	0	0	0	0	0	0	0	1
I	2645380	2650427	5048	1	SPAC4F8.13c	NULL	3210	2272	4647	6908	4.72235	4.51555	5.20922	5.26082	4012.51	5001.11	3023.92	0.604649	-0.725831	6.27127e-11	5.46301e-10	NA	NA	0	0	0	0	0	0	0	0	0	0	1
I	2650688	2658024	7337	1	SPAC4F8.12c	SPAC4F8.11	10808	7686	15312	22182	5.93432	5.73434	6.39003	6.40439	13234.7	16265.2	10204.3	0.627372	-0.672607	2.10733e-10	1.77146e-09	NA	NA	0	0	0	0	0	0	0	0	0	0	1
I	2660766	2661423	658	1	SPNCRNA.326	SPAC4F8.11	1	0	0	1	-3.98623	-16.6096	-16.6096	-4.55334	0.431978	0.368314	0.495642	1.34571	0.428364	1	1	NA	NA	0	0	0	0	0	0	0	0	0	0	1
I	2661646	2662535	890	1	SPAC4F8.10c	NULL	830	549	990	1380	5.27479	4.9703	5.48225	5.44106	894.649	1031.67	757.626	0.734368	-0.445425	0.00144821	0.00467099	NA	NA	0	0	0	0	0	0	0	0	0	0	1
I	2663415	2664052	638	1	SPNCRNA.200	SPAC4F8.08	7	3	4	1	-1.13454	-2.06509	-1.98873	-4.50882	3.9223	2.48306	5.36154	2.15925	1.11053	0.408964	0.597154	NA	NA	0	0	0	0	0	0	0	0	0	0	1
I	2664345	2667395	3051	1	SPAC4F8.07c	SPAC4F8.08	23902	21628	34692	44197	8.34526	8.49284	8.83588	8.66486	30053.4	34619.5	25487.2	0.736209	-0.441813	0.00096302	0.00320757	NA	NA	0	0	0	0	0	0	0	0	0	0	1
I	2667490	2667719	230	1	SPNCRNA.201	NULL	0	2	1	0	-16.6096	-1.17816	-2.51678	-16.6096	0.895023	0.528686	1.26136	2.38584	1.2545	0.9245	0.999973	NA	NA	0	0	0	0	0	0	0	0	0	0	1
I	2669647	2670368	722	1	SPAC4F8.05c	SPAC4F8.04	446	332	412	682	4.68053	4.54648	4.51927	4.72604	449.725	469.008	430.442	0.917771	-0.123794	0.399325	0.587079	NA	NA	0	0	0	0	0	0	0	0	0	0	1
I	2673637	2674938	1302	1	SPAC4F8.02c	SPAC4F8.01	817	599	1235	1626	4.70316	4.5472	5.25241	5.12886	1017.26	1251.8	782.717	0.625271	-0.677447	4.23311e-07	2.41627e-06	NA	NA	0	0	0	0	0	0	0	0	0	0	1
I	2676680	2679291	2612	1	SPAC644.04	SPAC644.05c	1252	1069	1787	2539	4.3447	4.40854	4.81115	4.79751	1587.33	1879.91	1294.74	0.688725	-0.537999	6.74218e-06	3.24064e-05	NA	NA	0	0	0	0	0	0	0	0	0	0	1
I	2682538	2684586	2049	1	SPNCRNA.844	NULL	112	109	115	164	1.18214	1.43478	1.17342	1.16512	122.729	121.202	124.256	1.0252	0.0358995	0.967265	1	NA	NA	0	0	0	0	0	0	0	0	0	0	1
I	2686071	2687821	1751	1	SPAC644.07	NULL	1666	1248	1833	2746	5.30369	5.17874	5.39466	5.45742	1796.65	1980.47	1612.83	0.814367	-0.29625	0.0124879	0.0325596	NA	NA	0	0	0	0	0	0	0	0	0	0	1
I	2687961	2689170	1210	1	SPAC644.08	NULL	970	850	755	1188	5.12115	5.22244	4.71279	4.84641	926.783	836.714	1016.85	1.21529	0.281302	0.0497761	0.109535	NA	NA	0	0	0	0	0	0	0	0	0	0	1
I	2689590	2691120	1531	1	SPAC644.09	NULL	789	656	746	1118	5.10001	5.12549	4.9723	5.03561	805.481	806.174	804.788	0.998281	-0.00248282	0.930041	1	NA	NA	0	0	0	0	0	0	0	0	0	0	1
I	2691326	2692150	825	1	SPAC644.10	SPAC644.11c	581	431	578	783	4.97856	4.83953	4.92424	4.84182	576.881	593.97	559.791	0.942457	-0.0855007	0.62515	0.795537	NA	NA	0	0	0	0	0	0	0	0	0	0	1
I	2694347	2694522	176	1	SPNCRNA.202	NULL	0	0	0	0	-16.6096	-16.6096	-16.6096	-16.6096	0	0	0	NA	NA	NA	NA	NA	NA	0	0	0	0	0	0	0	0	0	0	1
I	2694717	2697430	2714	1	SPAC644.12	SPAC644.13c	2900	2557	4337	5855	5.64191	5.75212	6.17569	6.0883	3749.7	4449.39	3050.01	0.68549	-0.544791	6.62554e-07	3.6855e-06	NA	NA	0	0	0	0	0	0	0	0	0	0	1
I	2700391	2701213	823	1	SPAC644.15	NULL	2172	1701	2992	4440	7.03613	6.9753	7.45136	7.50044	2683.23	3217.14	2149.32	0.668085	-0.581897	2.6093e-07	1.53389e-06	NA	NA	0	0	0	0	0	0	0	0	0	0	1
I	2701588	2703006	1419	1	SPAC644.16	SPAC644.17c	2268	2001	2257	3078	6.09328	6.2044	6.03941	5.96664	2356.51	2326.91	2386.11	1.02544	0.036242	0.790377	0.917837	NA	NA	0	0	0	0	0	0	0	0	0	0	1
I	2703965	2704030	66	1	SPNCRNA.198	NULL	1	0	0	1	-0.668887	-16.6096	-16.6096	-1.23609	0.431978	0.368314	0.495642	1.34571	0.428364	1	1	NA	NA	0	0	0	0	0	0	0	0	0	0	1
I	2705950	2706037	88	1	SPSNORNA.54	SPAPB2B4.01c	50895	47841	42601	59064	14.5513	14.7538	14.2478	14.1988	49837.3	44276.6	55398.1	1.25118	0.323291	0.036476	0.0832429	NA	NA	0	0	0	0	0	0	0	0	0	0	1
I	2707388	2707925	538	1	SPNCRNA.845	SPAPB2B4.01c	44	31	25	26	1.76346	1.55004	0.90103	0.437254	32.0763	22.7933	41.3593	1.81454	0.859604	0.0603211	0.129003	NA	NA	0	0	0	0	0	0	0	0	0	0	1
I	2708050	2709309	1260	1	SPAPB2B4.02	NULL	2017	1532	1264	1930	6.4955	6.39052	5.77443	5.86467	1672.51	1379.1	1965.91	1.4255	0.511468	2.30796e-05	0.000101594	NA	NA	0	0	0	0	0	0	0	0	0	0	1
I	2709731	2714162	4432	1	SPAPB2B4.03	c("SPNCRNA.846", "SPAPB2B4.04c")	2234	1523	3030	4497	4.38716	4.12626	4.77999	4.82927	2663.01	3258.22	2067.79	0.634637	-0.655996	1.35877e-08	9.49951e-08	NA	NA	0	0	0	0	0	0	0	0	0	0	1
I	2720607	2722630	2024	1	SPAPB2B4.05	NULL	2703	1995	2784	3990	6.14647	6.00012	6.14222	6.14108	2769.68	2941.43	2597.93	0.883219	-0.179157	0.125918	0.238749	NA	NA	0	0	0	0	0	0	0	0	0	0	1
I	2722668	2724062	1395	1	SPAPB2B4.06	NULL	733	568	592	743	4.62052	4.54442	4.26545	4.07286	654.085	586.639	721.532	1.22994	0.298591	0.0279086	0.0661692	NA	NA	0	0	0	0	0	0	0	0	0	0	1
I	2724338	2725954	1617	1	SPAPB2B4.07	NULL	1042	901	1231	1706	4.74152	4.82358	4.93514	4.88556	1181.93	1279.16	1084.7	0.847983	-0.237892	0.0549483	0.119277	NA	NA	0	0	0	0	0	0	0	0	0	0	1
I	2725990	2732444	6455	1	SPAC6F6.01	SPAC6F6.02c	3029	2376	3951	5701	4.28391	4.22542	4.62043	4.62906	3594.19	4188.59	2999.8	0.716182	-0.481601	1.33099e-05	6.10985e-05	NA	NA	0	0	0	0	0	0	0	0	0	0	1
I	2726058	2726682	625	1	SPNCRNA.204	NULL	164	159	238	366	3.44533	3.69247	3.93574	4.03625	221.097	260.63	181.563	0.696633	-0.521529	0.00685313	0.0190076	NA	NA	0	0	0	0	0	0	0	0	0	0	1
I	2734065	2736123	2059	1	SPNCRNA.847	c("SPAC6F6.03c", "SPNCRNA.499")	53	46	16	19	0.0956905	0.183145	-1.67905	-1.95148	35.3686	15.4569	55.2803	3.57641	1.83851	9.65069e-05	0.00038693	NA	NA	0	0	0	0	0	0	0	0	0	0	1
I	2738026	2740228	2203	1	SPNCRNA.848	SPAC6F6.04c	339	256	204	276	2.67537	2.56205	1.8958	1.81154	269.492	209.506	329.477	1.57263	0.653183	0.000418425	0.0014971	NA	NA	0	0	0	0	0	0	0	0	0	0	1
I	2738681	2740459	1779	1	SPNCRNA.205	SPAC6F6.04c	335	259	198	304	2.96665	2.88726	2.16114	2.25935	273.017	216.647	329.386	1.52038	0.604434	0.00139582	0.00451753	NA	NA	0	0	0	0	0	0	0	0	0	0	1
I	2740496	2741450	955	1	SPAC6F6.05	SPAC6F6.06c	1917	1507	1446	2234	6.46314	6.40778	6.0095	6.1167	1743.94	1587.29	1900.58	1.19737	0.259873	0.0347688	0.0797868	NA	NA	0	0	0	0	0	0	0	0	0	0	1
I	2748833	2749765	933	1	SPAC6F6.09	SPAC6F6.10c	678	535	753	1039	5.01575	4.96582	5.12026	5.06437	727.119	780.778	673.459	0.862549	-0.213322	0.135447	0.253651	NA	NA	0	0	0	0	0	0	0	0	0	0	1
I	2752633	2754327	1695	1	SPNCRNA.849	SPAC6F6.11c	122	124	137	189	1.57916	1.89443	1.6996	1.64344	140.357	142.041	138.673	0.976285	-0.0346258	0.837353	0.949069	NA	NA	0	0	0	0	0	0	0	0	0	0	1
I	2754502	2756380	1879	1	SPAC6F6.12	c("SPNCRNA.850", "SPAC6F6.13c")	1891	1673	1944	2797	5.50971	5.62481	5.50273	5.50722	2025.16	2057.94	1992.39	0.968147	-0.0467014	0.618361	0.789828	NA	NA	0	0	0	0	0	0	0	0	0	0	1
I	2758791	2760056	1266	1	SPNCRNA.851	c("SPAC6F6.13c", "SPAC6F6.19")	50	30	36	62	0.713288	0.268139	0.192505	0.456411	42.7853	41.8681	43.7025	1.04381	0.0618639	0.903058	0.990393	NA	NA	0	0	0	0	0	0	0	0	0	0	1
I	2761907	2763604	1698	1	SPAC6F6.15	SPAC6F6.16c	2379	1860	2205	3680	6.41545	6.35221	6.25902	6.47758	2436.67	2521.15	2352.2	0.932988	-0.10007	0.309905	0.487481	NA	NA	0	0	0	0	0	0	0	0	0	0	1
I	2766283	2770704	4422	1	SPAC6F6.17	c("SPNCRNA.852", "SPAC1805.01c")	5982	4341	7341	10107	5.81141	5.64063	6.05991	6.00085	6653.17	7603.63	5702.71	0.749999	-0.415039	0.000158833	0.000611885	NA	NA	0	0	0	0	0	0	0	0	0	0	1
I	2775128	2781053	5926	1	SPAC1805.04	SPAC1805.03c	3831	2957	5047	7178	4.76181	4.68004	5.11266	5.10046	4537.88	5312.03	3763.73	0.708529	-0.497102	5.65631e-06	2.7545e-05	NA	NA	0	0	0	0	0	0	0	0	0	0	1
I	2781154	2783133	1980	1	SPAC1805.05	NULL	4519	3209	4844	6913	6.7188	6.51673	6.77214	6.76489	4685.38	5107.11	4263.66	0.834849	-0.260413	0.0212309	0.0521605	NA	NA	0	0	0	0	0	0	0	0	0	0	1
I	2784605	2785492	888	1	SPNCRNA.853	c("SPAC1805.06c", "SPAC1805.07c")	37	26	18	23	0.79053	0.573332	-0.295844	-0.462568	26.362	17.9876	34.7364	1.93114	0.949451	0.0683119	0.143184	NA	NA	0	0	0	0	0	0	0	0	0	0	1
I	2788022	2788718	697	1	SPAC1805.08	SPNCRNA.854	3286	2490	2962	3963	7.85793	7.74956	7.66131	7.56097	3112.33	3025.59	3199.07	1.05734	0.0804361	0.41126	0.598976	NA	NA	0	0	0	0	0	0	0	0	0	0	1
I	2789090	2789377	288	1	SPAC1805.18	NULL	289	262	258	378	5.38049	5.5308	5.16993	5.20058	292.051	275.623	308.479	1.1192	0.162473	0.427847	0.615295	NA	NA	0	0	0	0	0	0	0	0	0	0	1
I	2789709	2789981	273	1	SPSNORNA.52	NULL	1268	1008	1485	2108	7.59107	7.55182	7.77212	7.75717	1412.85	1561.5	1264.2	0.809604	-0.304711	0.0132085	0.0342821	NA	NA	0	0	0	0	0	0	0	0	0	0	1
I	2791137	2794932	3796	1	SPAC1805.10	c("SPAC1805.09c", "SPAC1805.11c", "SPAC1805.12c")	3162	2396	2942	4311	5.11184	5.00345	4.96095	4.99181	3110.76	3143.19	3078.33	0.979364	-0.0300829	0.797447	0.922744	NA	NA	0	0	0	0	0	0	0	0	0	0	1
I	2794903	2795753	851	1	SPAC1805.13	NULL	37628	28197	56890	82363	11.3295	11.205	11.879	11.8924	48422.8	60412.3	36433.3	0.603077	-0.729585	1.65165e-12	1.67129e-11	NA	NA	0	0	0	0	0	0	0	0	0	0	1
I	2795957	2797948	1992	1	SPAC1805.14	SPAC1805.15c	1185	895	1681	2379	4.62615	4.51304	5.08373	5.0644	1458.37	1764.94	1151.79	0.652598	-0.615734	6.46271e-07	3.59825e-06	NA	NA	0	0	0	0	0	0	0	0	0	0	1
I	2802514	2802681	168	1	SPNCRNA.208	NULL	0	0	1	1	-16.6096	-16.6096	-2.06363	-2.58396	0.4485	0.896999	0	0	#NAME?	0.827124	0.942129	NA	NA	0	0	0	0	0	0	0	0	0	0	1
I	2803886	2808253	4368	1	SPAC1805.17	NULL	11209	8553	13358	20714	6.82574	6.7274	7.03193	7.14447	12820.6	14691.4	10949.9	0.745323	-0.424062	3.83879e-05	0.000163002	NA	NA	0	0	0	0	0	0	0	0	0	0	1
I	2812662	2813530	869	1	SPAC1B2.06	NULL	71	65	160	212	1.76202	1.92646	2.88735	2.77298	119.428	162.672	76.1848	0.468333	-1.09439	3.21465e-05	0.000138162	NA	NA	0	0	0	0	0	0	0	0	0	0	1
I	2814097	2815495	1399	1	SPAC1B2.04	NULL	1287	1007	1384	2193	5.75691	5.69478	5.81489	5.95859	1406.2	1539.41	1272.99	0.82693	-0.274163	0.0205466	0.0506867	NA	NA	0	0	0	0	0	0	0	0	0	0	1
I	2815646	2820694	5049	1	SPAC1B2.05	SPAC3F10.02c	1282	867	1075	1459	3.42122	3.14874	3.1203	3.04058	1143.96	1105.71	1182.21	1.06919	0.0965214	0.357457	0.542221	NA	NA	0	0	0	0	0	0	0	0	0	0	1
I	2821301	2823619	2319	1	SPAC3F10.03	NULL	17371	13450	21322	29715	8.28059	8.20333	8.5294	8.48788	19654.8	22217.1	17092.4	0.769338	-0.37831	0.000304712	0.0011227	NA	NA	0	0	0	0	0	0	0	0	0	0	1
I	2823667	2827612	3946	1	SPAC3F10.04	c("SPAC3F10.05c", "SPAC3F10.06c")	5638	4384	5515	7904	5.91201	5.84089	5.83333	5.83219	5693.09	5826.85	5559.33	0.954089	-0.067805	0.535351	0.717868	NA	NA	0	0	0	0	0	0	0	0	0	0	1
I	2830300	2831707	1408	1	SPAC3F10.19	SPAC3F10.08c	1747	1426	1484	1908	6.14615	6.14506	5.8639	5.70611	1626.27	1487.31	1765.24	1.18686	0.247155	0.0332362	0.076813	NA	NA	0	0	0	0	0	0	0	0	0	0	1
I	2832709	2834985	2277	1	SPAC3F10.09	c("SPAC3F10.08c", "SPAC3F10.10c")	1539	1280	2523	3357	5.0768	5.10277	5.74309	5.63476	2070.18	2570.3	1570.06	0.610848	-0.711115	1.48382e-09	1.15287e-08	NA	NA	0	0	0	0	0	0	0	0	0	0	1
I	2845944	2848624	2681	1	SPAC3F10.13	SPAC3F10.15c	3667	2866	3413	4754	5.82731	5.76357	5.6769	5.63464	3590.21	3555.37	3625.05	1.0196	0.0280022	0.773754	0.906605	NA	NA	0	0	0	0	0	0	0	0	0	0	1
I	2851905	2853653	1749	1	SPAC3F10.17	SPAC3F10.18c	1568	1471	2906	3642	5.33466	5.53435	6.17792	5.98325	2291.33	2877.76	1704.9	0.592439	-0.755261	1.9279e-06	1.00795e-05	NA	NA	0	0	0	0	0	0	0	0	0	0	1
I	2855630	2859170	3541	1	SPAC8F11.03	c("SPAC8F11.02c", "SPNCRNA.856")	819	596	1111	1557	3.2776	3.11086	3.67066	3.63721	971.325	1160.83	781.816	0.673495	-0.57026	2.0956e-05	9.29967e-05	NA	NA	0	0	0	0	0	0	0	0	0	0	1
I	2859388	2861935	2548	1	SPAC8F11.04	c("SPNCRNA.856", "SPAC8F11.05c")	3936	2931	5906	8102	6.10125	5.96773	6.63985	6.57558	4952.93	6106.49	3799.37	0.622185	-0.684584	5.21339e-10	4.22277e-09	NA	NA	0	0	0	0	0	0	0	0	0	0	1
I	2862580	2863845	1266	1	SPAC8F11.06	SPAC8F11.07c	476	364	537	818	3.96424	3.86903	4.09135	4.17816	525.339	585.185	465.493	0.795464	-0.330132	0.0281191	0.0666026	NA	NA	0	0	0	0	0	0	0	0	0	0	1
I	2872137	2874308	2172	1	SPNCRNA.857	SPACUNK4.17	285	253	305	430	2.4455	2.56549	2.49649	2.47165	310.222	319.624	300.82	0.941169	-0.0874746	0.594552	0.767026	NA	NA	0	0	0	0	0	0	0	0	0	0	1
I	2874956	2877487	2532	1	SPACUNK4.19	NULL	77	63	45	57	0.336221	0.338528	-0.48556	-0.664883	61.341	44.7847	77.8973	1.73937	0.798566	0.0214212	0.0525663	NA	NA	0	0	0	0	0	0	0	0	0	0	1
I	2877422	2880590	3169	1	SPACUNK4.16c	NULL	11057	7554	5579	10551	7.17835	6.92051	6.14461	6.54355	8540.04	6835.61	10244.5	1.49869	0.583703	0.00548836	0.015574	NA	NA	0	0	0	0	0	0	0	0	0	0	1
I	2885222	2886782	1561	1	SPACUNK4.13c	c("SPACUNK4.14", "SPNCRNA.56")	423	346	529	692	3.64365	3.64557	3.9194	3.78654	481.21	534.548	427.872	0.800437	-0.321139	0.0442095	0.0987147	NA	NA	0	0	0	0	0	0	0	0	0	0	1
I	2886960	2890095	3136	1	SPACUNK4.12c	NULL	2684	2142	3151	4411	5.15094	5.11733	5.33551	5.30045	2985.87	3290.52	2681.22	0.814832	-0.295426	0.00878643	0.023707	NA	NA	0	0	0	0	0	0	0	0	0	0	1
I	2890095	2890887	793	1	SPACUNK4.11c	NULL	313	303	600	783	4.13803	4.383	5.02997	4.89366	475.917	605.601	346.232	0.571717	-0.806628	2.39006e-07	1.4161e-06	NA	NA	0	0	0	0	0	0	0	0	0	0	1
I	2892446	2893920	1475	1	SPACUNK4.20	c("SPACUNK4.10", "SPACUNK4.09")	72	87	116	112	1.01892	1.58375	1.66011	1.08913	96.567	102.579	90.5554	0.88279	-0.179858	0.692217	0.851981	NA	NA	0	0	0	0	0	0	0	0	0	0	1
I	2893868	2895019	1152	1	SPNCRNA.559	SPACUNK4.09	36	28	29	34	0.375496	0.30474	0.0166989	-0.274179	31.6784	27.8545	35.5022	1.27456	0.349994	0.45353	0.640491	NA	NA	0	0	0	0	0	0	0	0	0	0	1
I	2893895	2895984	2090	1	SPNCRNA.858	c("SPACUNK4.09", "SPACUNK4.08")	146	98	109	146	1.53603	1.25273	1.06753	0.968811	122.785	111.401	134.17	1.2044	0.268311	0.259197	0.426044	NA	NA	0	0	0	0	0	0	0	0	0	0	1
I	2897980	2901970	3991	1	SPACUNK4.07c	c("SPACUNK4.08", "SPAPYUK71.03c")	10031	7165	12896	19215	6.70513	6.51152	7.02073	7.07568	11692.8	13895.1	9490.61	0.68302	-0.550001	1.9472e-07	1.16754e-06	NA	NA	0	0	0	0	0	0	0	0	0	0	1
I	2902104	2903133	1030	1	SPACUNK4.06c	SPAPYUK71.03c	900	844	2039	2800	5.27787	5.47701	6.41088	6.34809	1543.82	2109.27	978.372	0.463844	-1.10829	8.34506e-20	1.28264e-18	NA	NA	0	0	0	0	0	0	0	0	0	0	1
I	2910333	2910975	643	1	SPNCRNA.209	NULL	19	18	13	8	0.294749	0.508559	-0.299589	-1.52037	15.2944	9.81942	20.7694	2.11514	1.08075	0.105195	0.205973	NA	NA	0	0	0	0	0	0	0	0	0	0	1
I	2911289	2912543	1255	1	SPAC513.02	NULL	235	146	86	131	2.95853	2.56365	1.46143	1.54822	151.136	93.716	208.555	2.22539	1.15406	1.44378e-06	7.65171e-06	NA	NA	0	0	0	0	0	0	0	0	0	0	1
I	2913403	2913705	303	1	SPAC513.04	NULL	0	0	0	0	-16.6096	-16.6096	-16.6096	-16.6096	0	0	0	NA	NA	NA	NA	NA	NA	0	0	0	0	0	0	0	0	0	0	1
I	2914480	2920278	5799	1	SPAC513.05	SPAC513.06c	2630	1739	2162	3206	4.23474	3.92975	3.90519	3.95324	2362.06	2323.83	2400.29	1.0329	0.0467042	0.649511	0.817295	NA	NA	0	0	0	0	0	0	0	0	0	0	1
I	2921063	2922821	1759	1	SPAC513.07	NULL	2731	2232	2080	3238	6.01016	6.01088	5.57046	5.68861	2526.77	2292.27	2761.28	1.20461	0.268561	0.0250569	0.0602049	NA	NA	0	0	0	0	0	0	0	0	0	0	1
I	2922761	2924720	1960	1	SPAC2E1P3.01	SPAC2E1P3.02c	2416	1787	1623	2501	5.67725	5.53398	5.05644	5.15992	2051.85	1779.21	2324.5	1.30648	0.385682	0.00101672	0.00337518	NA	NA	0	0	0	0	0	0	0	0	0	0	1
I	2924745	2926536	1792	1	SPNCRNA.859	SPAC2E1P3.02c	91	70	185	244	1.07593	0.989234	2.05266	1.93165	138.463	187.675	89.2511	0.475561	-1.0723	1.87347e-05	8.36337e-05	NA	NA	0	0	0	0	0	0	0	0	0	0	1
I	2931763	2935115	3353	1	SPAC2E1P3.04	c("SPNCRNA.860", "SPNCRNA.528")	4652	3975	3315	4476	5.84788	5.9128	5.31219	5.22502	4106.92	3401.16	4812.68	1.41501	0.500812	5.23703e-06	2.57012e-05	NA	NA	0	0	0	0	0	0	0	0	0	0	1
I	2938121	2939967	1847	1	SPNCRNA.862	c("SPNCRNA.861", "SPNCRNA.863")	192	154	201	356	2.10948	2.08312	2.12872	2.43303	214.837	237.385	192.288	0.810025	-0.303962	0.107861	0.210292	NA	NA	0	0	0	0	0	0	0	0	0	0	1
I	2942326	2946190	3865	1	SPAPB2C8.01	NULL	6085	5158	5479	7290	6.03027	6.08364	5.83207	5.72372	5925.35	5581.67	6269.03	1.12315	0.167544	0.115353	0.222406	NA	NA	0	0	0	0	0	0	0	0	0	0	1
I	2947050	2950086	3037	1	SPAPB24D3.01	SPAPB24D3.02c	2360	1810	2913	5002	5.01163	4.92064	5.26849	5.52812	2846.81	3382.37	2311.25	0.683322	-0.549361	0.000316692	0.00116185	NA	NA	0	0	0	0	0	0	0	0	0	0	1
I	2952226	2953762	1537	1	SPAPB24D3.03	c("SPAPB24D3.02c", "SPAPB24D3.04c")	500	549	736	1443	3.75537	4.18206	4.26629	4.71722	757.327	920.589	594.065	0.645309	-0.631938	0.0397066	0.089864	NA	NA	0	0	0	0	0	0	0	0	0	0	1
I	2954212	2955627	1416	1	SPNCRNA.864	c("SPAPB24D3.04c", "SPAPB24D3.05c")	124	95	105	146	1.86208	1.76955	1.57527	1.53049	115.33	109.286	121.374	1.11061	0.151357	0.560536	0.742106	NA	NA	0	0	0	0	0	0	0	0	0	0	1
I	2956805	2959658	2854	1	SPNCRNA.865	c("SPAPB24D3.06c", "SPAPB24D3.07c")	247	182	218	376	1.84509	1.69633	1.61805	1.88409	245.473	253.739	237.207	0.934847	-0.0971984	0.571254	0.751407	NA	NA	0	0	0	0	0	0	0	0	0	0	1
I	2959156	2959658	503	1	SPNCRNA.210	SPAPB24D3.07c	16	13	35	64	0.401081	0.393335	1.4835	1.83386	29.1026	42.0761	16.1291	0.383332	-1.38333	0.00647189	0.0180378	NA	NA	0	0	0	0	0	0	0	0	0	0	1
I	2973017	2976287	3271	1	SPNCRNA.867	SPNCRNA.866	977	852	282	368	3.63218	3.72649	1.79267	1.65632	653.105	284.629	1021.58	3.58917	1.84365	4.45064e-35	9.98607e-34	NA	NA	0	0	0	0	0	0	0	0	0	0	1
I	2975608	2976007	400	1	SPNCRNA.31	SPNCRNA.866	683	633	85	76	6.14737	6.3295	3.09417	2.41234	405.337	72.9301	737.744	10.1158	3.33853	4.51334e-39	1.07283e-37	NA	NA	0	0	0	0	0	0	0	0	0	0	1
I	2976370	2979495	3126	1	SPAPB1A11.01	SPNCRNA.868	275	186	79	114	1.86867	1.59636	0.0223216	0.0310681	168.681	83.7539	253.608	3.02801	1.59837	2.8882e-12	2.87002e-11	NA	NA	0	0	0	0	0	0	0	0	0	0	1
I	2976790	2976979	190	1	SPRRNA.13	NULL	0	0	0	0	-16.6096	-16.6096	-16.6096	-16.6096	0	0	0	NA	NA	NA	NA	NA	NA	0	0	0	0	0	0	0	0	0	0	1
I	2980428	2981839	1412	1	SPAPB1A11.02	SPNCRNA.869	34	39	2	1	0.102114	0.591863	-4.03198	-5.5519	21.437	1.42568	41.4484	29.0726	4.86159	1.0189e-09	7.99926e-09	NA	NA	0	0	0	0	0	0	0	0	0	0	1
I	2984439	2986118	1680	1	SPAPB1A11.03	SPAPB1A11.04c	54	46	9	10	0.416137	0.476625	-2.21562	-2.58396	32.1086	8.44131	55.776	6.6075	2.72411	2.01821e-07	1.20771e-06	NA	NA	0	0	0	0	0	0	0	0	0	0	1
I	2989280	2990817	1538	1	SPAC31G5.01	NULL	1002	894	979	1398	4.8118	4.93907	4.73144	4.72506	1046.47	1032.49	1060.46	1.0271	0.0385706	0.83925	0.950859	NA	NA	0	0	0	0	0	0	0	0	0	0	1
I	2990804	2992231	1428	1	SPAC31G5.02	NULL	2515	1848	3071	4496	6.50065	6.34787	6.74194	6.77152	2845.78	3279.53	2412.04	0.735482	-0.443238	9.98273e-05	0.000398778	NA	NA	0	0	0	0	0	0	0	0	0	0	1
I	2992622	2993240	619	1	SPAC31G5.03	SPNCRNA.870	6172	5529	8790	11442	8.69321	8.82631	9.15648	9.01652	7703.76	8861.39	6546.13	0.738725	-0.43689	0.000163623	0.000628322	NA	NA	0	0	0	0	0	0	0	0	0	0	1
I	2993423	2994929	1507	1	SPAC31G5.04	c("SPNCRNA.870", "SPAC31G5.05c")	10071	5678	6475	9237	8.11594	7.581	7.43183	7.42401	7698.98	6825.35	8572.61	1.256	0.328832	0.18103	0.320406	NA	NA	0	0	0	0	0	0	0	0	0	0	1
I	2996304	2997058	755	1	SPAC31G5.06	SPNCRNA.871	92	66	173	249	2.43757	2.25022	3.30178	3.30679	135.198	183.173	87.224	0.476184	-1.07041	2.17179e-05	9.60227e-05	NA	NA	0	0	0	0	0	0	0	0	0	0	1
I	2997453	2998157	705	1	SPAC31G5.07	SPNCRNA.871	55	32	65	108	1.69537	1.20583	1.88952	2.10168	60.7923	74.1424	47.4421	0.639878	-0.644132	0.0742093	0.153553	NA	NA	0	0	0	0	0	0	0	0	0	0	1
I	2998749	3001070	2322	1	SPAC31G5.08	SPAC31G5.09c	691	543	955	1345	3.62688	3.57096	4.04683	4.02051	842.612	1000.28	684.948	0.684759	-0.546332	6.04462e-05	0.000250292	NA	NA	0	0	0	0	0	0	0	0	0	0	1
I	3001761	3001930	170	1	SPNCRNA.71	c("SPNCRNA.872", "SPNCRNA.72")	169	103	2	4	5.36697	4.94441	-1.08073	-0.601103	75.6271	2.53063	148.724	58.7695	5.877	2.02063e-27	3.83186e-26	NA	NA	0	0	0	0	0	0	0	0	0	0	1
I	3002057	3003766	1710	1	SPAC31G5.10	c("SPNCRNA.872", "SPNCRNA.72", "SPNCRNA.73", "SPNCRNA.74")	174	153	214	273	2.07865	2.18491	2.33032	2.16125	198.212	213.688	182.736	0.855151	-0.225749	0.295509	0.471525	NA	NA	0	0	0	0	0	0	0	0	0	0	1
I	3003816	3004916	1101	1	SPNCRNA.01	c("SPNCRNA.872", "SPNCRNA.873")	269	156	346	485	3.34235	2.8481	3.65866	3.62551	296.636	361.557	231.714	0.640877	-0.64188	0.000810384	0.00273639	NA	NA	0	0	0	0	0	0	0	0	0	0	1
I	3006138	3006845	708	1	SPAC31G5.11	NULL	5471	4413	6607	9053	8.32547	8.30724	8.5508	8.48484	6161.11	6827.37	5494.85	0.804827	-0.31325	0.00369086	0.0109018	NA	NA	0	0	0	0	0	0	0	0	0	0	1
I	3009988	3010684	697	1	SPAC31G5.21	SPNCRNA.874	998	793	480	648	5.89337	5.85346	4.7905	4.7031	743.608	492.436	994.78	2.02012	1.01444	3.67453e-13	3.92081e-12	NA	NA	0	0	0	0	0	0	0	0	0	0	1
I	3010632	3012307	1676	1	SPAC31G5.13	NULL	5108	3857	3994	6337	6.98322	6.86976	6.58144	6.72704	4704.92	4445.57	4964.27	1.11668	0.159213	0.161832	0.293095	NA	NA	0	0	0	0	0	0	0	0	0	0	1
I	3012251	3014213	1963	1	SPAC31G5.14	SPNCRNA.875	2862	2539	2862	4075	5.91945	6.0385	5.87259	5.86201	3016.9	3013.98	3019.83	1.00194	0.0027969	0.94403	1	NA	NA	0	0	0	0	0	0	0	0	0	0	1
I	3014259	3017900	3642	1	SPAC31G5.15	SPAC31G5.16c	2147	1641	2294	3078	4.74967	4.65374	4.79836	4.70212	2222.78	2346.47	2099.09	0.894572	-0.160731	0.193348	0.337729	NA	NA	0	0	0	0	0	0	0	0	0	0	1
I	3023051	3028158	5108	1	SPAC31G5.19	SPAC1786.01c	4038	3138	5349	7534	5.05399	4.982	5.41276	5.38654	4791.65	5602.81	3980.48	0.710443	-0.49321	6.35161e-06	3.06573e-05	NA	NA	0	0	0	0	0	0	0	0	0	0	1
I	3033828	3037249	3422	1	SPAC1786.02	SPAC1786.04	6729	3608	4993	8830	6.35104	5.74366	5.8737	6.17584	5751.3	5891.94	5610.67	0.952262	-0.0705688	0.855626	0.961518	NA	NA	0	0	0	0	0	0	0	0	0	0	1
I	3033837	3033955	119	1	SPNCRNA.88	SPAC1786.04	176	95	245	452	5.9401	5.34234	6.37045	6.73363	221.577	296.006	147.148	0.497111	-1.00836	0.00123692	0.00403589	NA	NA	0	0	0	0	0	0	0	0	0	0	1
I	3037689	3039659	1971	1	SPAC1786.03	NULL	1061	767	1138	1766	4.51306	4.33674	4.56728	4.6809	1130.85	1252.09	1009.61	0.806341	-0.310538	0.0146936	0.0376724	NA	NA	0	0	0	0	0	0	0	0	0	0	1
I	3041074	3043306	2233	1	SPAC24C9.03	c("SPNCRNA.878", "SPAC24C9.16c")	4154	3684	4479	6524	6.271	6.38959	6.33282	6.35504	4576.59	4770.86	4382.32	0.91856	-0.122554	0.21113	0.362317	NA	NA	0	0	0	0	0	0	0	0	0	0	1
I	3043895	3045082	1188	1	SPAC24C9.04	SPAC24C9.05c	1322	921	1052	1519	5.52967	5.30004	5.15323	5.16285	1175.87	1115.65	1236.1	1.10796	0.147911	0.210129	0.360805	NA	NA	0	0	0	0	0	0	0	0	0	0	1
I	3051825	3053237	1413	1	SPNCRNA.879	SPAC24C9.07c	39	46	29	40	0.196354	0.726323	-0.277919	-0.334333	39.2029	30.0644	48.3413	1.60792	0.6852	0.138451	0.25847	NA	NA	0	0	0	0	0	0	0	0	0	0	1
I	3057965	3059473	1509	1	SPNCRNA.880	SPAC24C9.07c	192	93	252	290	2.40107	1.64708	2.74653	2.4288	196.928	240.04	153.817	0.640796	-0.642062	0.0923244	0.184823	NA	NA	0	0	0	0	0	0	0	0	0	0	1
I	3060292	3061152	861	1	SPNCRNA.212	SPNCRNA.881	90	61	53	98	2.11747	1.84817	1.30669	1.67311	73.5972	64.1151	83.0793	1.29578	0.373825	0.269687	0.439951	NA	NA	0	0	0	0	0	0	0	0	0	0	1
I	3060538	3061276	739	1	SPNCRNA.882	SPNCRNA.881	101	75	73	128	2.50427	2.36669	1.98903	2.27884	91.5495	85.7382	97.3609	1.13556	0.183404	0.582069	0.760052	NA	NA	0	0	0	0	0	0	0	0	0	0	1
I	3061210	3063526	2317	1	SPAC24C9.08	SPNCRNA.881	4140	3325	2641	3562	6.25007	6.22561	5.55467	5.46591	3428.58	2708.19	4148.97	1.53201	0.615423	2.45894e-08	1.6592e-07	NA	NA	0	0	0	0	0	0	0	0	0	0	1
I	3063681	3066413	2733	1	SPAC24C9.09	SPAC24C9.10c	1238	983	1399	1851	4.23301	4.19208	4.36254	4.24609	1327.47	1421.38	1233.56	0.867864	-0.20446	0.114074	0.220471	NA	NA	0	0	0	0	0	0	0	0	0	0	1
I	3066462	3069156	2695	1	SPAC24C9.11	NULL	1196	992	1627	2200	4.27981	4.30182	4.67696	4.59188	1444.44	1670.46	1218.42	0.729393	-0.455232	0.000215643	0.000811212	NA	NA	0	0	0	0	0	0	0	0	0	0	1
I	3072847	3077223	4377	1	SPAC24C9.14	c("SPNCRNA.883", "SPAC24C9.15c")	2018	1539	1695	2590	4.25847	4.15935	3.95997	4.05128	1910.44	1850.05	1970.82	1.06528	0.0912303	0.460566	0.647814	NA	NA	0	0	0	0	0	0	0	0	0	0	1
I	3076914	3077076	163	1	SPNCRNA.213	NULL	7	16	4	6	0.834119	2.31857	-0.0200848	0.0445143	8.9425	4.32462	13.5604	3.13562	1.64875	0.211408	0.362742	NA	NA	0	0	0	0	0	0	0	0	0	0	1
I	3077159	3080590	3432	1	SPAC16A10.01	SPAC16A10.03c	510	403	370	704	2.62501	2.5771	2.11518	2.52287	480.924	454.906	506.942	1.11439	0.15625	0.52834	0.710611	NA	NA	0	0	0	0	0	0	0	0	0	0	1
I	3080862	3083426	2565	1	SPAC16A10.02	SPAC16A10.03c	1119	865	1621	2242	4.20714	4.12751	4.69495	4.64249	1391.46	1682.76	1100.16	0.653785	-0.613112	8.83345e-07	4.82205e-06	NA	NA	0	0	0	0	0	0	0	0	0	0	1
I	3086310	3086392	83	1	SPATRNALYS.05	NULL	1	1	2	3	-0.999526	-0.707717	-0.0463959	0.0182033	1.64432	2.16231	1.12632	0.520888	-0.940955	0.824583	0.94171	NA	NA	0	0	0	0	0	0	0	0	0	0	1
I	3086472	3086930	459	1	SPNCRNA.215	NULL	4	1	0	4	-1.46683	-3.17492	-16.6096	-2.03403	2.04325	1.47325	2.61325	1.77379	0.826838	0.842628	0.953159	NA	NA	0	0	0	0	0	0	0	0	0	0	1
I	3086938	3088619	1682	1	SPAC16A10.04	NULL	828	702	1345	1938	4.73918	4.79283	5.39222	5.39882	1139	1424.87	853.129	0.59874	-0.739998	5.45611e-09	3.99118e-08	NA	NA	0	0	0	0	0	0	0	0	0	0	1
I	3093372	3095062	1691	1	SPNCRNA.885	c("SPAC16A10.07c", "SPAC16A10.08c")	297	207	210	259	2.86614	2.63713	2.31922	2.10142	242.087	206.417	277.757	1.34561	0.428258	0.0192043	0.0477879	NA	NA	0	0	0	0	0	0	0	0	0	0	1
I	3098723	3099907	1185	1	SPNCRNA.886	c("SPAC589.02c", "SPAC589.03c")	190	158	74	101	2.73467	2.76041	1.32742	1.25581	135.071	76.3224	193.819	2.53948	1.34453	7.9353e-08	5.00028e-07	NA	NA	0	0	0	0	0	0	0	0	0	0	1
I	3100014	3101322	1309	1	SPAC589.04	c("SPAC589.03c", "SPAC589.05c")	1096	890	2026	2743	5.20907	5.20052	6.0486	5.96536	1592.97	2081.4	1104.53	0.530666	-0.914124	7.34044e-14	8.23502e-13	NA	NA	0	0	0	0	0	0	0	0	0	0	1
I	3104356	3105524	1169	1	SPNCRNA.560	SPAC589.07c	96	97	121	141	1.76939	2.07616	2.05644	1.75676	112.33	115.903	108.758	0.938349	-0.0918035	0.748079	0.886871	NA	NA	0	0	0	0	0	0	0	0	0	0	1
I	3105882	3108318	2437	1	SPAC589.09	c("SPAC589.07c", "SPAC589.08c", "SPAC589.10c")	1589	1364	1633	2233	4.7585	4.83004	4.75105	4.68214	1666.81	1685.79	1647.82	0.97748	-0.0328616	0.766796	0.902326	NA	NA	0	0	0	0	0	0	0	0	0	0	1
I	3109174	3110015	842	1	SPAC589.11	NULL	83	50	95	135	2.64986	2.2105	2.79782	2.78442	86.3099	99.9475	72.6723	0.727105	-0.459764	0.15047	0.276776	NA	NA	0	0	0	0	0	0	0	0	0	0	1
I	3110201	3113396	3196	1	SPAC589.12	NULL	5976	4704	8461	12517	6.36394	6.31046	6.81874	6.86336	7506.03	9083.39	5928.68	0.652694	-0.615521	5.84567e-09	4.27353e-08	NA	NA	0	0	0	0	0	0	0	0	0	0	1
I	3117041	3119298	2258	1	SPNCRNA.887	c("SPAC688.06c", "SPAC688.07c")	242	172	54	83	2.15352	1.95274	-0.0572986	0.0424897	143.771	59.1191	228.422	3.86377	1.95001	7.09319e-15	8.54886e-14	NA	NA	0	0	0	0	0	0	0	0	0	0	1
I	3123163	3126653	3491	1	SPAC688.08	NULL	1378	1152	1880	2687	4.07041	4.10379	4.47171	4.46661	1696.56	1983.59	1409.54	0.710601	-0.492889	3.19172e-05	0.000137226	NA	NA	0	0	0	0	0	0	0	0	0	0	1
I	3127538	3129464	1927	1	SPAC688.09	NULL	1154	1009	1425	2159	4.67216	4.77026	4.92963	5.00866	1378.45	1548.57	1208.33	0.780288	-0.357922	0.00243387	0.00745882	NA	NA	0	0	0	0	0	0	0	0	0	0	1
I	3129707	3134492	4786	1	SPAC688.10	NULL	1503	1158	1754	2670	3.70451	3.62011	3.88046	3.96629	1692.99	1910.71	1475.28	0.772109	-0.373124	0.00159671	0.00510031	NA	NA	0	0	0	0	0	0	0	0	0	0	1
I	3134962	3138666	3705	1	SPAC688.11	SPNCRNA.888	8363	6142	10324	15149	6.55003	6.39653	6.80709	6.83994	9528.21	11037.7	8018.69	0.72648	-0.461005	1.41671e-05	6.46378e-05	NA	NA	0	0	0	0	0	0	0	0	0	0	1
I	3138602	3139458	857	1	SPNCRNA.889	c("SPNCRNA.888", "SPAC688.12c")	545	505	286	379	4.72245	4.90429	3.74535	3.63117	439.707	290.795	588.619	2.02417	1.01733	1.88438e-09	1.4463e-08	NA	NA	0	0	0	0	0	0	0	0	0	0	1
I	3139395	3141117	1723	1	SPAC688.13	c("SPAC688.12c", "SPNCRNA.890")	400	304	352	532	3.26864	3.16452	3.03736	3.11284	386.012	382.04	389.984	1.02079	0.0296893	0.879607	0.977486	NA	NA	0	0	0	0	0	0	0	0	0	0	1
I	3141223	3143183	1961	1	SPAC688.14	SPNCRNA.890	896	768	1394	1926	4.37227	4.44169	4.96307	4.90909	1187.41	1446.36	928.458	0.641927	-0.639518	4.04107e-07	2.31547e-06	NA	NA	0	0	0	0	0	0	0	0	0	0	1
I	3143864	3144530	667	1	SPAC688.16	NULL	1040	769	669	971	6.19573	6.05201	5.51237	5.52947	855.892	711.323	1000.46	1.40648	0.492088	0.000230337	0.000861358	NA	NA	0	0	0	0	0	0	0	0	0	0	1
I	3145214	3145728	515	1	SPAC3G9.16c	SPNCRNA.891	148	155	204	299	3.71457	4.07306	4.13069	4.1619	194.544	217.978	171.11	0.784991	-0.349252	0.0759941	0.156553	NA	NA	0	0	0	0	0	0	0	0	0	0	1
I	3145867	3146559	693	1	SPAC3G9.15c	NULL	1126	966	1771	2266	6.07576	6.14647	6.68227	6.51749	1469.12	1770.9	1167.33	0.659173	-0.601271	1.11393e-06	5.99625e-06	NA	NA	0	0	0	0	0	0	0	0	0	0	1
I	3149910	3150625	716	1	SPNCRNA.216	SPAC3G9.14	25	23	62	55	0.535535	0.707053	1.79901	1.10582	39.9662	53.0358	26.8967	0.507143	-0.979536	0.0538751	0.117414	NA	NA	0	0	0	0	0	0	0	0	0	0	1
I	3150082	3156856	6775	1	SPAC3G9.13c	c("SPAC3G9.14", "SPAC3G9.12")	628	542	687	930	2.02535	2.10469	2.10804	2.0246	679.415	705.739	653.092	0.925402	-0.111848	0.424894	0.612844	NA	NA	0	0	0	0	0	0	0	0	0	0	1
I	3157430	3157501	72	1	SPATRNAALA.03	SPAC3G9.12	0	0	1	1	-16.6096	-16.6096	-0.84127	-1.36162	0.4485	0.896999	0	0	#NAME?	0.827124	0.942129	NA	NA	0	0	0	0	0	0	0	0	0	0	1
I	3158482	3159120	639	1	SPNCRNA.217	NULL	17	7	21	22	0.143288	-0.844993	0.401285	-0.0519596	16.023	19.2053	12.8407	0.668601	-0.580783	0.503678	0.688315	NA	NA	0	0	0	0	0	0	0	0	0	0	1
I	3159753	3162245	2493	1	SPAC3G9.11c	NULL	110	108	88	138	0.873185	1.13853	0.504403	0.633133	109.993	97.3516	122.634	1.2597	0.333083	0.266795	0.436323	NA	NA	0	0	0	0	0	0	0	0	0	0	1
I	3163136	3164354	1219	1	SPAC3G9.10c	NULL	701	625	1780	2432	4.77891	4.90516	6.07644	6.00635	1289.21	1836.8	741.62	0.403757	-1.30844	5.31945e-25	9.5448e-24	NA	NA	0	0	0	0	0	0	0	0	0	0	1
I	3164749	3164820	72	1	SPATRNATHR.04	NULL	448	521	180	252	8.01291	8.52251	6.65056	6.61562	369.305	187.978	550.632	2.92923	1.55052	0.000537821	0.00188662	NA	NA	0	0	0	0	0	0	0	0	0	0	1
I	3165354	3165546	193	1	SPRRNA.14	NULL	0	0	1	0	-16.6096	-16.6096	-2.26376	-16.6096	0.264343	0.528686	0	0	#NAME?	1	1	NA	NA	0	0	0	0	0	0	0	0	0	0	1
I	3165556	3166062	507	1	SPNCRNA.218	NULL	30	29	39	53	1.29654	1.53944	1.62819	1.55035	36.6492	40.1394	33.159	0.826097	-0.275618	0.54089	0.723518	NA	NA	0	0	0	0	0	0	0	0	0	0	1
I	3166394	3167699	1306	1	SPAC3G9.09c	SPNCRNA.892	7623	6456	10410	14420	8.11934	8.17144	8.52203	8.47176	9332.33	10814.7	7849.95	0.725859	-0.462238	9.92042e-06	4.63906e-05	NA	NA	0	0	0	0	0	0	0	0	0	0	1
I	3169678	3171512	1835	1	SPAC3G9.07c	NULL	462	430	686	1075	3.38567	3.57393	3.90913	4.03682	629.397	758.615	500.179	0.659332	-0.600924	1.66547e-05	7.51308e-05	NA	NA	0	0	0	0	0	0	0	0	0	0	1
I	3177931	3179269	1339	1	SPNCRNA.893	SPNCRNA.87	9300	12130	23648	28803	8.17156	8.84665	9.47112	9.23526	17685.3	23110.9	12259.6	0.530469	-0.914658	0.00168915	0.00535992	NA	NA	0	0	0	0	0	0	0	0	0	0	1
I	3178807	3179222	416	1	SPNCRNA.219	NULL	10	6	5	11	-0.00301255	-0.448159	-1.04985	-0.432723	7.71769	6.69488	8.7405	1.30555	0.384659	0.774643	0.90725	NA	NA	0	0	0	0	0	0	0	0	0	0	1
I	3185314	3186584	1271	1	SPAC1486.01	SPAC1486.02c	3121	2511	2437	3573	6.81837	6.79644	6.41461	6.44628	2867.46	2604.39	3130.54	1.20202	0.265464	0.0206266	0.0508526	NA	NA	0	0	0	0	0	0	0	0	0	0	1
I	3190456	3191217	762	1	SPNCRNA.14	SPAC1486.03c	20	14	12	10	0.123779	-0.0989783	-0.660033	-1.44341	14.3849	10.0274	18.7424	1.86912	0.902361	0.186226	0.327348	NA	NA	0	0	0	0	0	0	0	0	0	0	1
I	3196998	3202450	5453	1	SPAC1486.05	SPNCRNA.894	10646	8270	15838	24416	6.36361	6.29107	6.88983	6.99391	13929.2	17366.1	10492.3	0.604186	-0.726936	2.23161e-12	2.23421e-11	NA	NA	0	0	0	0	0	0	0	0	0	0	1
I	3202780	3203137	358	1	SPAC1486.11	SPNCRNA.894	291	235	295	430	5.26115	5.24461	5.23399	5.25725	303.389	314.337	292.442	0.930344	-0.104163	0.553573	0.735372	NA	NA	0	0	0	0	0	0	0	0	0	0	1
I	3203863	3205821	1959	1	SPAC1486.06	NULL	2544	2066	2602	3731	5.86261	5.85417	5.84828	5.84786	2656.86	2749.82	2563.9	0.932389	-0.100997	0.359493	0.544112	NA	NA	0	0	0	0	0	0	0	0	0	0	1
I	3207482	3209724	2243	1	SPAC1486.08	SPNCRNA.895	710	645	609	846	3.79459	3.94789	3.52636	3.48021	696.129	633.563	758.695	1.1975	0.260032	0.0774819	0.159154	NA	NA	0	0	0	0	0	0	0	0	0	0	1
I	3209851	3211529	1679	1	SPAC1486.09	NULL	1597	1392	2714	3410	5.50093	5.59454	6.21913	6.02812	2180.12	2690.8	1669.45	0.620427	-0.688666	3.81417e-07	2.19278e-06	NA	NA	0	0	0	0	0	0	0	0	0	0	1
I	3211823	3214509	2687	1	SPAC1486.10	NULL	2346	1816	3508	5013	5.17969	5.10207	5.71328	5.70794	3004.54	3700.99	2308.09	0.623643	-0.681209	1.61193e-09	1.24997e-08	NA	NA	0	0	0	0	0	0	0	0	0	0	1
I	3226929	3228192	1264	1	SPAC6G10.06	SPNCRNA.896	1	10	3	1	-4.76751	-1.15412	-3.22966	-5.33453	4.37841	1.95437	6.80245	3.48063	1.79935	0.50172	0.686911	NA	NA	0	0	0	0	0	0	0	0	0	0	1
I	3228497	3231398	2902	1	SPAC6G10.07	NULL	3798	3227	5746	7824	5.78825	5.84501	6.33871	6.26369	4918.58	5919.51	3917.65	0.66182	-0.595489	3.74373e-08	2.46245e-07	NA	NA	0	0	0	0	0	0	0	0	0	0	1
I	3231335	3232976	1642	1	SPAC6G10.08	NULL	10180	8262	9656	13447	8.0077	7.99834	7.8846	7.84202	10157	10057.7	10256.3	1.01975	0.0282121	0.786536	0.915858	NA	NA	0	0	0	0	0	0	0	0	0	0	1
I	3233580	3237281	3702	1	SPAC6G10.09	SPAC6G10.10c	7486	6053	12331	18055	6.41099	6.39626	7.08416	7.11391	10348.5	13169.1	7527.88	0.571631	-0.806843	1.37638e-14	1.61664e-13	NA	NA	0	0	0	0	0	0	0	0	0	0	1
I	3239376	3241996	2621	1	SPNCRNA.897	c("SPAC6G10.12c", "SPAC6G9.01c")	135	123	135	181	1.09641	1.25392	1.04955	0.952218	141.261	138.037	144.485	1.04671	0.0658649	0.819257	0.938215	NA	NA	0	0	0	0	0	0	0	0	0	0	1
I	3247789	3252881	5093	1	SPAC6G9.04	NULL	1793	1377	2264	3141	3.86935	3.78031	4.15899	4.11098	2055.48	2353.82	1757.13	0.746504	-0.421779	0.000369915	0.0013387	NA	NA	0	0	0	0	0	0	0	0	0	0	1
I	3253202	3254430	1229	1	SPAC6G9.05	SPAC6G9.06c	452	358	490	681	3.98987	3.94532	4.05947	4.01398	479.846	509.878	449.814	0.8822	-0.180823	0.256219	0.4219	NA	NA	0	0	0	0	0	0	0	0	0	0	1
I	3255912	3258277	2366	1	SPNCRNA.898	SPAC6G9.06c	53	35	89	170	-0.104814	-0.411634	0.596137	1.00943	79.0046	109.666	48.3428	0.440818	-1.18175	0.000163176	0.000627006	NA	NA	0	0	0	0	0	0	0	0	0	0	1
I	3259564	3262222	2659	1	SPAC6G9.08	SPAC6G9.09c	2624	2382	2722	4386	5.35637	5.50859	5.36241	5.53029	2928.68	3054.51	2802.85	0.91761	-0.124047	0.262475	0.430771	NA	NA	0	0	0	0	0	0	0	0	0	0	1
I	3267461	3269670	2210	1	SPAC6G9.11	SPAC6G9.10c	3969	3264	4107	5787	6.26261	6.27229	6.26506	6.23943	4164.24	4302.74	4025.74	0.935623	-0.0960012	0.368834	0.555239	NA	NA	0	0	0	0	0	0	0	0	0	0	1
I	3270191	3272367	2177	1	SPAC6G9.12	SPAC6G9.13c	3965	3246	3983	5395	6.24046	6.24362	6.20014	6.11755	4052.61	4092.81	4012.41	0.980356	-0.0286218	0.813069	0.933807	NA	NA	0	0	0	0	0	0	0	0	0	0	1
I	3273940	3278265	4326	1	SPAC6G9.14	c("SPNCRNA.899", "SPAC6G9.15c")	2444	2057	2975	4218	4.56847	4.61158	4.80526	4.78856	2817.52	3126.39	2508.66	0.802415	-0.31758	0.0042338	0.0123626	NA	NA	0	0	0	0	0	0	0	0	0	0	1
I	3281408	3283071	1664	1	SPAC652.01	c("SPAPB1E7.01c", "SPAPB1E7.02c")	601	505	565	759	3.96737	4.0081	3.8314	3.73688	597.316	578.257	616.374	1.06592	0.0920952	0.528955	0.711198	NA	NA	0	0	0	0	0	0	0	0	0	0	1
I	3286487	3288578	2092	1	SPAPB1E7.03	NULL	2819	2267	3749	5158	5.86132	5.83874	6.22579	6.16573	3354.39	3881.8	2826.97	0.728261	-0.457472	4.3272e-05	0.000182836	NA	NA	0	0	0	0	0	0	0	0	0	0	1
I	3293591	3297452	3862	1	SPAPB1E7.05	SPAPB1E7.06c	2619	2015	2859	4513	4.81515	4.72873	4.89479	5.03301	2871.31	3173.71	2568.91	0.809433	-0.305016	0.00537703	0.0152989	NA	NA	0	0	0	0	0	0	0	0	0	0	1
I	3302875	3310369	7495	1	SPAPB1E7.07	NULL	21637	16093	33384	41900	6.90498	6.76973	7.48379	7.29122	26977.9	33082	20873.7	0.63097	-0.664356	2.68598e-07	1.57511e-06	NA	NA	0	0	0	0	0	0	0	0	0	0	1
I	3313324	3315900	2577	1	SPAPB1E7.09	NULL	5138	4071	5890	8373	6.371	6.32699	6.5212	6.50832	5655.98	6197.85	5114.11	0.825143	-0.277285	0.00991133	0.0264971	NA	NA	0	0	0	0	0	0	0	0	0	0	1
I	3316817	3317528	712	1	SPAPB1E7.10	SPAPB1E7.11c	492	404	653	869	4.84227	4.84978	5.20383	5.09575	581.974	665.296	498.651	0.749517	-0.415967	0.00548931	0.015574	NA	NA	0	0	0	0	0	0	0	0	0	0	1
I	3319189	3320060	872	1	SPAPB1E7.12	NULL	31021	23858	39963	58484	10.5283	10.4413	10.8468	10.8758	36545.2	42668.3	30422.1	0.71299	-0.488046	2.04493e-06	1.06265e-05	NA	NA	0	0	0	0	0	0	0	0	0	0	1
I	3321855	3323689	1835	1	SPAPB1E7.14	SPAC2E1P5.01c	695	548	1242	1444	4.0548	4.00378	4.84553	4.54257	939.278	1188.47	690.084	0.580648	-0.784264	0.000109568	0.000435659	NA	NA	0	0	0	0	0	0	0	0	0	0	1
I	3326830	3329028	2199	1	SPAC2E1P5.03	SPAC2E1P5.04c	1644	1273	2112	2803	4.95585	4.87868	5.27039	5.15839	1883.33	2148.97	1617.69	0.752776	-0.409707	0.000712621	0.0024399	NA	NA	0	0	0	0	0	0	0	0	0	0	1
I	3329311	3331216	1906	1	SPAC2E1P5.05	NULL	2988	2663	5024	6949	6.02412	6.1498	6.72692	6.67452	4188	5215.53	3160.48	0.605975	-0.722669	2.88667e-11	2.59757e-10	NA	NA	0	0	0	0	0	0	0	0	0	0	1
I	3332541	3334714	2174	1	SPAC26A3.01	NULL	13018	10598	13703	19776	7.95757	7.95267	7.9847	7.99359	13832.3	14528.3	13136.2	0.904178	-0.145321	0.151252	0.277916	NA	NA	0	0	0	0	0	0	0	0	0	0	1
I	3334824	3337714	2891	1	SPAC26A3.02	SPAC26A3.03c	1479	1065	1453	2025	4.4812	4.29925	4.40876	4.36728	1459.37	1514.02	1404.73	0.927817	-0.108088	0.431723	0.618647	NA	NA	0	0	0	0	0	0	0	0	0	0	1
I	3337678	3338408	731	1	SPAC26A3.04	SPAC26A3.03c	18022	12781	26832	36376	9.99923	9.79528	10.5266	10.4452	22288.3	27583.5	16993.2	0.616064	-0.698847	4.26833e-11	3.78412e-10	NA	NA	0	0	0	0	0	0	0	0	0	0	1
I	3339116	3344445	5330	1	SPAC26A3.05	NULL	30417	23011	40351	58604	7.91438	7.80364	8.27525	8.29328	36253.1	42917.6	29588.5	0.689426	-0.536533	2.04906e-07	1.22492e-06	NA	NA	0	0	0	0	0	0	0	0	0	0	1
I	3344729	3345820	1092	1	SPAC26A3.06	NULL	1077	814	2112	3012	5.60437	5.49226	6.5291	6.52085	1636.56	2225.94	1047.18	0.470443	-1.08791	5.57846e-19	8.20636e-18	NA	NA	0	0	0	0	0	0	0	0	0	0	1
I	3346955	3348195	1241	1	SPAC26A3.08	SPAC26A3.09c	1995	1550	1844	3003	6.13799	6.06568	5.97758	6.16078	2023.65	2080.94	1966.36	0.944938	-0.081709	0.418218	0.605595	NA	NA	0	0	0	0	0	0	0	0	0	0	1
I	3352347	3356297	3951	1	SPAC26A3.10	c("SPAC26A3.09c", "SPAC26A3.12c")	2535	1730	2720	4167	4.86068	4.60128	4.91545	5.01049	2660.16	2972.79	2347.53	0.789673	-0.340673	0.00320064	0.00958116	NA	NA	0	0	0	0	0	0	0	0	0	0	1
I	3356375	3357902	1528	1	SPAC26A3.11	SPAC26A3.12c	1232	1068	1340	2012	5.11187	5.19759	5.18624	5.25227	1366.84	1449.49	1284.2	0.885968	-0.174674	0.125794	0.238588	NA	NA	0	0	0	0	0	0	0	0	0	0	1
I	3369709	3371384	1676	1	SPAC26A3.16	c("SPAC26A3.15c", "SPAC26A3.17c")	2310	1545	2122	2767	5.83836	5.54988	5.66903	5.53157	2130.16	2140.99	2119.33	0.989883	-0.01467	0.933671	1	NA	NA	0	0	0	0	0	0	0	0	0	0	1
I	3371461	3372746	1286	1	SPNCRNA.902	SPAC26A3.17c	94	64	61	99	1.6014	1.33863	0.930699	1.10895	77.8334	68.7129	86.9539	1.26547	0.33967	0.284898	0.45782	NA	NA	0	0	0	0	0	0	0	0	0	0	1
I	3374696	3375004	309	1	SPAC8E11.12	c("SPAC8E11.10", "SPNCRNA.903")	8	7	16	11	0.104035	0.203203	1.05717	-0.00375095	10.4452	12.5104	8.3799	0.669834	-0.578125	0.601056	0.773404	NA	NA	0	0	0	0	0	0	0	0	0	0	1
I	3375516	3376823	1308	1	SPAC8E11.08c	SPNCRNA.903	101	72	69	101	1.68055	1.48408	1.08401	1.11334	84.5739	73.679	95.4688	1.29574	0.373777	0.210775	0.36176	NA	NA	0	0	0	0	0	0	0	0	0	0	1
I	3377096	3378081	986	1	SPAC8E11.07c	SPAC8E11.06	997	882	1094	1526	5.74635	5.86135	5.83344	5.79322	1095.42	1140.43	1050.42	0.921071	-0.118616	0.324489	0.505144	NA	NA	0	0	0	0	0	0	0	0	0	0	1
I	3378217	3380590	2374	1	SPAC8E11.05c	NULL	2714	2006	3155	4515	5.56859	5.4243	5.73895	5.73567	2970.63	3330.94	2610.32	0.783658	-0.351704	0.00209666	0.00650847	NA	NA	0	0	0	0	0	0	0	0	0	0	1
I	3380524	3381918	1395	1	SPAC8E11.04c	NULL	1079	827	1257	1743	5.42306	5.33114	5.59649	5.54772	1181.45	1306.53	1056.37	0.808532	-0.306623	0.0177118	0.0445167	NA	NA	0	0	0	0	0	0	0	0	0	0	1
I	3382274	3383404	1131	1	SPAC8E11.03c	SPNCRNA.904	42	42	32	55	0.722051	1.01386	0.282881	0.543876	42.2404	37.1752	47.3055	1.2725	0.347669	0.483721	0.670816	NA	NA	0	0	0	0	0	0	0	0	0	0	1
I	3384190	3385685	1496	1	SPAC8E11.02c	SPNCRNA.905	37710	31970	44992	59674	10.4894	10.5429	10.6972	10.5843	42309.4	45765.4	38853.5	0.848972	-0.236211	0.022006	0.0538115	NA	NA	0	0	0	0	0	0	0	0	0	0	1
I	3385899	3388219	2321	1	SPAC8E11.01c	SPNCRNA.905	790	688	1289	1916	3.82066	3.91303	4.48014	4.53162	1106.31	1387.16	825.465	0.595074	-0.74886	3.31821e-09	2.47556e-08	NA	NA	0	0	0	0	0	0	0	0	0	0	1
I	3388183	3389788	1606	1	SPAC959.02	SPAC959.03c	3544	2663	4789	7088	6.72682	6.6063	7.11431	7.1596	4289.27	5142.48	3436.06	0.668171	-0.581711	1.10509e-07	6.83437e-07	NA	NA	0	0	0	0	0	0	0	0	0	0	1
I	3391861	3393106	1246	1	SPAC959.10	c("SPAC959.11", "SPAC959.04c")	220	197	378	572	2.87376	3.00626	3.60778	3.68505	321.902	410.519	233.285	0.56827	-0.815352	2.99438e-06	1.51817e-05	NA	NA	0	0	0	0	0	0	0	0	0	0	1
I	3394875	3395200	326	1	SPSNORNA.20	NULL	149630	123659	252729	346700	14.2178	14.2346	14.9271	14.8629	206730	261309	152152	0.58227	-0.780239	2.51713e-14	2.90256e-13	NA	NA	0	0	0	0	0	0	0	0	0	0	1
I	3394883	3395271	389	1	SPNCRNA.906	SPAC959.05c	135364	113942	235468	323917	13.8183	13.8616	14.5702	14.5099	191372	243792	138953	0.569967	-0.811051	2.06546e-15	2.58269e-14	NA	NA	0	0	0	0	0	0	0	0	0	0	1
I	3399174	3400238	1065	1	SPAC959.07	NULL	21603	17035	29276	41741	9.71779	9.66688	10.1094	10.1008	26151.3	30851.6	21451	0.695297	-0.5243	3.81389e-07	2.19278e-06	NA	NA	0	0	0	0	0	0	0	0	0	0	1
I	3400477	3401152	676	1	SPAC959.08	SPAC959.09c	27776	25575	38552	46931	10.7362	10.9089	11.1623	10.9256	33781.9	37667.2	29896.6	0.793704	-0.333328	0.05164	0.11318	NA	NA	0	0	0	0	0	0	0	0	0	0	1
I	3405955	3409780	3826	1	SPAP32A8.02	SPAP32A8.03c	819	553	726	989	3.15158	2.87681	2.93084	2.85647	751.393	748.088	754.697	1.00883	0.0126899	0.815576	0.935516	NA	NA	0	0	0	0	0	0	0	0	0	0	1
I	3410909	3411881	973	1	SPAC3H5.12c	NULL	6059	5616	8533	14075	8.01405	8.19633	8.46117	8.66282	8120.14	9695.29	6545	0.67507	-0.566892	0.000135131	0.000527687	NA	NA	0	0	0	0	0	0	0	0	0	0	1
I	3412527	3413053	527	1	SPAC3H5.13	SPAC3H5.11	283	204	534	755	4.73551	4.55509	5.60469	5.58396	414.66	560.395	268.925	0.479886	-1.05924	2.22955e-10	1.87288e-09	NA	NA	0	0	0	0	0	0	0	0	0	0	1
I	3416544	3425062	8519	1	SPAC3H5.09c	NULL	5776	4109	8802	12546	4.81487	4.6154	5.37578	5.36674	7364.32	9274.35	5454.29	0.588105	-0.765854	1.35213e-12	1.37784e-11	NA	NA	0	0	0	0	0	0	0	0	0	0	1
I	3425873	3429364	3492	1	SPAC3H5.08c	NULL	3256	2453	4005	5522	5.33486	5.21812	5.5867	5.52973	3656.04	4151.21	3160.87	0.761433	-0.393212	0.000495636	0.00174937	NA	NA	0	0	0	0	0	0	0	0	0	0	1
I	3430961	3436241	5281	1	SPAC3H5.06c	SPAC3H5.04	3489	2644	6122	7822	4.80256	4.69429	5.5669	5.40007	4757.19	6117.56	3396.81	0.555256	-0.848775	1.23055e-13	1.36395e-12	NA	NA	0	0	0	0	0	0	0	0	0	0	1
I	3436186	3436825	640	1	SPAC3H5.05c	SPAC3H5.04	1206	1173	2412	4202	6.28957	6.54136	7.24271	7.5232	2080.19	2822.84	1337.53	0.473824	-1.07758	3.7303e-07	2.14765e-06	NA	NA	0	0	0	0	0	0	0	0	0	0	1
I	3438848	3442117	3270	1	SPAC3A11.14c	c("SPNCRNA.561", "SPAC3A11.13")	1192	921	1127	1668	4.02006	3.93976	3.89231	3.93758	1190.92	1210.18	1171.66	0.968175	-0.0466603	0.703811	0.85982	NA	NA	0	0	0	0	0	0	0	0	0	0	1
I	3443055	3443144	90	1	SPATRNAARG.01	NULL	94	113	207	341	5.43822	5.99562	6.53026	6.73004	176.445	235.033	117.857	0.50145	-0.995822	2.84971e-05	0.000123361	NA	NA	0	0	0	0	0	0	0	0	0	0	1
I	3443930	3446017	2088	1	SPAC3A11.12c	SPNCRNA.908	11070	8304	8737	13056	7.91579	7.79283	7.52749	7.58663	10075.9	9427.83	10723.9	1.13748	0.185836	0.0766524	0.157557	NA	NA	0	0	0	0	0	0	0	0	0	0	1
I	3446262	3448081	1820	1	SPAC3A11.11c	SPNCRNA.908	1068	831	1063	1645	4.60646	4.53628	4.55283	4.66242	1110.65	1167.87	1053.44	0.90202	-0.148768	0.222612	0.378934	NA	NA	0	0	0	0	0	0	0	0	0	0	1
I	3448125	3449855	1731	1	SPAC3A11.10c	SPAC3A11.09	7539	6172	2889	4507	7.49825	7.50143	6.06759	6.18883	5408.28	3187.36	7629.2	2.39358	1.25917	4.77362e-30	9.69587e-29	NA	NA	0	0	0	0	0	0	0	0	0	0	1
I	3452867	3455747	2881	1	SPAC3A11.08	SPNCRNA.909	806	658	1111	1754	3.53777	3.53689	3.95392	4.09235	1023.93	1233.39	814.475	0.660354	-0.598689	2.61611e-06	1.34006e-05	NA	NA	0	0	0	0	0	0	0	0	0	0	1
I	3455831	3456760	930	1	SPNCRNA.910	SPNCRNA.909	99	51	123	177	2.14376	1.47864	2.41006	2.41479	105.727	130.22	81.2333	0.623816	-0.680807	0.019431	0.048292	NA	NA	0	0	0	0	0	0	0	0	0	0	1
I	3456694	3459197	2504	1	SPAC3A11.07	SPNCRNA.909	5291	3083	7312	11009	6.45479	5.9674	6.87466	6.94464	6243.67	7920.51	4566.83	0.576583	-0.794401	3.67226e-06	1.84211e-05	NA	NA	0	0	0	0	0	0	0	0	0	0	1
I	3462282	3465427	3146	1	SPAC3A11.05c	SPAC3A11.04	1138	882	1088	1464	3.99201	3.91617	3.88033	3.78821	1117.36	1114.42	1120.3	1.00528	0.0075916	0.902207	0.989795	NA	NA	0	0	0	0	0	0	0	0	0	0	1
I	3466459	3470168	3710	1	SPAC3A11.03	SPAC3A11.02	256	179	366	540	1.58922	1.36485	2.05806	2.09882	316.082	392.388	239.776	0.611069	-0.710594	8.54602e-05	0.000344828	NA	NA	0	0	0	0	0	0	0	0	0	0	1
I	3475167	3479160	3994	1	SPAC328.02	c("SPNCRNA.911", "SPNCRNA.529")	1680	1228	1295	2172	4.12611	3.96578	3.70375	3.92946	1545.89	1484.63	1607.15	1.08253	0.11441	0.399273	0.587073	NA	NA	0	0	0	0	0	0	0	0	0	0	1
I	3479098	3481305	2208	1	SPAC328.03	NULL	7754	6968	5130	10461	7.18769	7.3253	6.54485	7.05247	7401.44	6565.09	8237.79	1.25479	0.327443	0.275843	0.446497	NA	NA	0	0	0	0	0	0	0	0	0	0	1
I	3481505	3484605	3101	1	SPAC328.04	NULL	866	658	750	1183	3.53519	3.43073	3.28086	3.41798	838.221	832.229	844.214	1.0144	0.0206273	0.927549	1	NA	NA	0	0	0	0	0	0	0	0	0	0	1
I	3484543	3486956	2414	1	SPAC328.05	NULL	893	677	1123	1511	4.22381	4.11612	4.50758	4.41536	1009.91	1150.24	869.579	0.756001	-0.403541	0.00260541	0.00793886	NA	NA	0	0	0	0	0	0	0	0	0	0	1
I	3487193	3491099	3907	1	SPAC328.06	SPAC328.07c	7027	5470	7114	10396	6.25369	6.18413	6.22458	6.25152	7261.38	7590.06	6932.7	0.913392	-0.130694	0.214526	0.367462	NA	NA	0	0	0	0	0	0	0	0	0	0	1
I	3494642	3496476	1835	1	SPAC328.09	SPAC328.10c	2130	1606	1481	2171	5.8211	5.70553	5.24996	5.28139	1825.59	1582.59	2068.59	1.30709	0.386358	0.00105214	0.00348124	NA	NA	0	0	0	0	0	0	0	0	0	0	1
I	3497897	3498505	609	1	SPNCRNA.222	SPNCRNA.912	2	3	0	0	-2.87471	-1.99798	-16.6096	-16.6096	1.44166	0	2.88333	Inf	Inf	0.227285	0.38476	NA	NA	0	0	0	0	0	0	0	0	0	0	1
I	3498988	3503915	4928	1	SPAC16E8.01	SPNCRNA.913	7602	4663	7067	9747	6.04425	5.63094	5.89211	5.83561	7017.45	7326.17	6708.73	0.915721	-0.12702	0.575149	0.754627	NA	NA	0	0	0	0	0	0	0	0	0	0	1
I	3504034	3506896	2863	1	SPAC16E8.02	SPAC16E8.04c	312	253	287	440	2.54975	2.53916	2.3824	2.47849	313.997	313.791	314.202	1.00131	0.00189155	0.971129	1	NA	NA	0	0	0	0	0	0	0	0	0	0	1
I	3505109	3505657	549	1	SPAC16E8.03	SPAC16E8.04c	236	185	205	297	4.45077	4.39133	4.20075	4.21523	225.709	217.77	233.647	1.07291	0.10153	0.6239	0.794411	NA	NA	0	0	0	0	0	0	0	0	0	0	1
I	3507206	3508322	1117	1	SPNCRNA.914	SPAC16E8.05c	187	167	205	254	2.79697	2.92559	2.8827	2.67154	199.97	201.932	198.009	0.98057	-0.0283074	0.924776	1	NA	NA	0	0	0	0	0	0	0	0	0	0	1
I	3508689	3509194	506	1	SPNCRNA.562	SPAC16E8.06c	8	11	1	4	-0.607487	0.14375	-3.65418	-2.17466	6.45228	2.00194	10.9026	5.44603	2.4452	0.0591158	0.126904	NA	NA	0	0	0	0	0	0	0	0	0	0	1
I	3513971	3515415	1445	1	SPAC16E8.08	NULL	629	426	866	1044	4.23257	3.96218	4.64702	4.39634	711.395	842.361	580.429	0.68905	-0.53732	0.0043237	0.0125944	NA	NA	0	0	0	0	0	0	0	0	0	0	1
I	3515632	3518734	3103	1	SPAC16E8.09	SPAC16E8.10c	1354	970	1541	2392	4.21578	4.02642	4.35556	4.46955	1489.29	1695.71	1282.86	0.756532	-0.402527	0.00096527	0.00321418	NA	NA	0	0	0	0	0	0	0	0	0	0	1
I	3525227	3527875	2649	1	SPAC16E8.13	SPAC16E8.14c	1576	1294	1245	1862	4.6263	4.63369	4.23933	4.29967	1470.62	1344.01	1597.23	1.1884	0.249026	0.0492692	0.108599	NA	NA	0	0	0	0	0	0	0	0	0	0	1
I	3527949	3529446	1498	1	SPAC16E8.15	SPAC16E8.14c	7631	5606	10335	15487	7.93329	7.7802	8.32403	8.38719	9242.94	11168	7317.84	0.655248	-0.609886	8.22913e-09	5.92576e-08	NA	NA	0	0	0	0	0	0	0	0	0	0	1
I	3529970	3532143	2174	1	SPAC16E8.16	NULL	3125	2772	1721	2577	5.99786	6.11675	5.0904	5.15248	2578.07	1859.01	3297.13	1.77359	0.826673	3.91884e-12	3.84642e-11	NA	NA	0	0	0	0	0	0	0	0	0	0	1
I	3536526	3538612	2087	1	SPAC1B1.01	NULL	1704	1356	2450	3039	5.22526	5.18751	5.70226	5.49271	2057.18	2414.58	1699.78	0.703962	-0.50643	0.000100531	0.000400921	NA	NA	0	0	0	0	0	0	0	0	0	0	1
I	3544327	3544849	523	1	SPNCRNA.915	SPAC1B1.04c	30	22	39	51	1.25171	1.09607	1.58337	1.45003	34.0735	39.4027	28.7442	0.729498	-0.455023	0.361209	0.54609	NA	NA	0	0	0	0	0	0	0	0	0	0	1
I	3549682	3552067	2386	1	SPAC17A2.01	NULL	285	161	199	300	2.30993	1.77784	1.74488	1.81671	229.25	215.703	242.798	1.12561	0.170711	0.450876	0.637718	NA	NA	0	0	0	0	0	0	0	0	0	0	1
I	3554125	3554684	560	1	SPNCRNA.916	c("SPAC17A2.02c", "SPAC17A2.03c")	63	41	99	144	2.22348	1.89557	2.8287	2.84891	81.2302	105.377	57.0833	0.541706	-0.884419	0.00523123	0.0149229	NA	NA	0	0	0	0	0	0	0	0	0	0	1
I	3558766	3559116	351	1	SPNCRNA.124	NULL	1	1	0	0	-3.07972	-2.78793	-16.6096	-16.6096	0.563161	0	1.12632	Inf	Inf	0.69034	0.850227	NA	NA	0	0	0	0	0	0	0	0	0	0	1
I	3560508	3562931	2424	1	SPAC17A2.05	NULL	2103	1577	2117	3454	5.37137	5.24792	5.33409	5.51998	2214.15	2391.38	2036.92	0.851774	-0.231457	0.0369892	0.0842798	NA	NA	0	0	0	0	0	0	0	0	0	0	1
I	3576109	3576590	482	1	SPNCRNA.917	NULL	3	3	0	5	-1.95239	-1.66058	-16.6096	-1.78265	2.61027	1.84157	3.37897	1.83483	0.875648	0.826721	0.942129	NA	NA	0	0	0	0	0	0	0	0	0	0	1
I	3576769	3578782	2014	1	SPAC17A2.11	SPNCRNA.918	13	10	20	25	-1.89987	-1.98656	-1.32526	-1.52368	16.2659	19.7816	12.7502	0.644547	-0.633641	0.386359	0.573599	NA	NA	0	0	0	0	0	0	0	0	0	0	1
I	3578771	3583005	4235	1	SPAC17A2.12	SPNCRNA.918	465	305	732	1043	2.18843	1.87182	2.79618	2.78665	596.99	771.149	422.831	0.548313	-0.866928	9.96594e-09	7.10399e-08	NA	NA	0	0	0	0	0	0	0	0	0	0	1
I	3584979	3586233	1255	1	SPNCRNA.920	SPNCRNA.919	227	184	103	163	2.90856	2.89739	1.72166	1.86353	171.523	114.49	228.556	1.9963	0.997329	1.20687e-05	5.56348e-05	NA	NA	0	0	0	0	0	0	0	0	0	0	1
I	3586167	3588777	2611	1	SPAC17A2.14	c("SPNCRNA.600", "SPAC17G6.02c")	3811	3010	3812	5366	5.92105	5.87246	5.87457	5.84751	3889.48	3991.72	3787.24	0.948774	-0.0758639	0.500223	0.685992	NA	NA	0	0	0	0	0	0	0	0	0	0	1
I	3590440	3595067	4628	1	SPAC17G6.03	c("SPNCRNA.600", "SPAC17G6.02c", "SPAC17G6.04c")	1893	1480	1420	2275	4.08577	4.02251	3.62413	3.78374	1730.15	1588.65	1871.66	1.17815	0.236518	0.0597177	0.127895	NA	NA	0	0	0	0	0	0	0	0	0	0	1
I	3591948	3592044	97	1	SPATRNALEU.03	NULL	397	346	250	393	7.40857	7.50201	6.6945	6.82674	345.952	276.919	414.985	1.49858	0.583598	0.00111423	0.00366745	NA	NA	0	0	0	0	0	0	0	0	0	0	1
I	3592235	3592483	249	1	SPNCRNA.226	NULL	2	3	2	2	-1.58447	-0.707717	-1.63133	-2.15167	2.33866	1.794	2.88333	1.60721	0.684555	0.849263	0.956966	NA	NA	0	0	0	0	0	0	0	0	0	0	1
I	3599034	3599783	750	1	SPAC17G6.06	NULL	9049	7381	11515	16555	9.10752	9.10539	9.40834	9.41173	10662.7	12185.2	9140.12	0.750097	-0.414851	6.56567e-05	0.000270654	NA	NA	0	0	0	0	0	0	0	0	0	0	1
I	3601674	3603904	2231	1	SPAC17G6.08	NULL	713	524	819	1220	3.72977	3.57725	3.88287	3.93746	783.103	882.336	683.869	0.775067	-0.367608	0.00792489	0.0216407	NA	NA	0	0	0	0	0	0	0	0	0	0	1
I	3604045	3605545	1501	1	SPAC17G6.09	NULL	1680	1533	2122	2727	5.53802	5.69773	5.82813	5.66966	1962.89	2126.26	1799.51	0.846326	-0.240714	0.0696407	0.14569	NA	NA	0	0	0	0	0	0	0	0	0	0	1
I	3605621	3607454	1834	1	SPAC17G6.10	SPAC17G6.11c	2117	1844	2854	3750	5.58251	5.67514	5.96662	5.84016	2551.15	2890.04	2212.25	0.765472	-0.385578	0.000720091	0.00246197	NA	NA	0	0	0	0	0	0	0	0	0	0	1
I	3610063	3611779	1717	1	SPNCRNA.921	SPAC17G6.11c	291	199	454	446	2.81469	2.55825	3.4095	2.86349	337.014	404.291	269.737	0.667186	-0.58384	0.124042	0.236054	NA	NA	0	0	0	0	0	0	0	0	0	0	1
I	3610148	3611124	977	1	SPNCRNA.227	SPAC17G6.11c	285	195	453	440	3.59809	3.34242	4.21978	3.65741	332.897	401.553	264.241	0.658047	-0.603736	0.122982	0.234367	NA	NA	0	0	0	0	0	0	0	0	0	0	1
I	3612082	3614883	2802	1	SPAC17G6.12	NULL	1258	936	1304	2055	4.47641	4.34168	4.48137	4.6172	1330.06	1446.29	1213.83	0.839274	-0.252786	0.0375385	0.0853755	NA	NA	0	0	0	0	0	0	0	0	0	0	1
I	3615585	3617100	1516	1	SPAC17G6.13	SPAC17G6.14c	5718	4504	2934	5632	7.29073	7.23824	6.28123	6.70164	4650.09	3625.51	5674.67	1.56521	0.646353	0.000225744	0.00084603	NA	NA	0	0	0	0	0	0	0	0	0	0	1
I	3623742	3625371	1630	1	SPAC17G6.17	SPAC17G6.16c	561	509	892	1195	3.83669	3.98816	4.45887	4.36041	755.397	911.722	599.071	0.657077	-0.605866	1.1199e-05	5.19045e-05	NA	NA	0	0	0	0	0	0	0	0	0	0	1
I	3625312	3627664	2353	1	SPAC1142.01	SPNCRNA.922	3092	2399	3030	4247	5.79863	5.72434	5.72255	5.68932	3105.84	3166.15	3045.53	0.961904	-0.0560354	0.642176	0.810672	NA	NA	0	0	0	0	0	0	0	0	0	0	1
I	3631499	3633874	2376	1	SPAC1142.04	SPAC1142.03c	4360	3481	7218	9544	6.25128	6.21827	6.93169	6.81433	5843.82	7331.24	4356.4	0.594224	-0.750921	5.13144e-12	4.98768e-11	NA	NA	0	0	0	0	0	0	0	0	0	0	1
I	3634370	3634504	135	1	SPRRNA.16	NULL	0	0	0	0	-16.6096	-16.6096	-16.6096	-16.6096	0	0	0	NA	NA	NA	NA	NA	NA	0	0	0	0	0	0	0	0	0	0	1
I	3635293	3636572	1280	1	SPAC1142.05	SPNCRNA.923	3756	3321	2759	4865	6.92854	7.04277	6.43663	6.73456	3603.31	3250.49	3956.12	1.21708	0.28343	0.134623	0.252345	NA	NA	0	0	0	0	0	0	0	0	0	0	1
I	3636685	3638390	1706	1	SPAC1142.06	NULL	6436	4809	6215	8940	7.29103	7.16242	7.19377	7.19792	6400.7	6578.5	6222.89	0.945944	-0.080174	0.479516	0.666988	NA	NA	0	0	0	0	0	0	0	0	0	0	1
I	3639473	3639914	442	1	SPNCRNA.924	SPAC1142.07c	6	8	5	10	-0.82743	-0.120588	-1.13731	-0.657686	7.17293	6.32656	8.0193	1.26756	0.342053	0.876265	0.975035	NA	NA	0	0	0	0	0	0	0	0	0	0	1
I	3639860	3642338	2479	1	SPAC1142.08	NULL	1599	1214	1806	2408	4.7429	4.63731	4.87167	4.76634	1699.94	1841.71	1558.18	0.846051	-0.241183	0.0548933	0.119222	NA	NA	0	0	0	0	0	0	0	0	0	0	1
I	3642498	3642845	348	1	SPAC1142.09	NULL	14	7	8	8	0.739905	0.031724	-0.114299	-0.634655	9.26487	7.17599	11.3538	1.58219	0.661918	0.440561	0.62691	NA	NA	0	0	0	0	0	0	0	0	0	0	1
I	3642972	3645636	2665	1	SPAC8C9.03	NULL	2345	1763	1611	2769	5.34204	5.2223	4.75355	5.0146	2072.87	1871.57	2274.17	1.21511	0.281089	0.0334241	0.0771878	NA	NA	0	0	0	0	0	0	0	0	0	0	1
I	3646174	3648784	2611	1	SPAC8C9.04	SPNCRNA.925	7350	6262	6878	9304	6.86863	6.92932	6.72602	6.64151	7327.69	7063.09	7592.29	1.07492	0.104236	0.331796	0.513523	NA	NA	0	0	0	0	0	0	0	0	0	0	1
I	3649373	3650629	1257	1	SPAC8C9.05	SPAC8C9.06c	739	625	829	1225	5.26106	5.31116	5.38	5.42298	824.96	889.465	760.455	0.854958	-0.226075	0.0823461	0.16771	NA	NA	0	0	0	0	0	0	0	0	0	0	1
I	3654213	3654875	663	1	SPAC8C9.07	SPAC8C9.06c	1148	875	1569	2080	6.16753	6.06757	6.57139	6.45777	1358.22	1595.6	1120.84	0.702458	-0.509516	5.86863e-05	0.00024334	NA	NA	0	0	0	0	0	0	0	0	0	0	1
I	3655124	3656213	1090	1	SPAC8C9.08	SPAC8C9.09c	2740	2357	3192	5408	7.02396	7.09855	7.19738	7.43766	3261.99	3679.4	2844.57	0.773107	-0.37126	0.00759932	0.0208603	NA	NA	0	0	0	0	0	0	0	0	0	0	1
I	3658390	3659824	1435	1	SPAC8C9.11	SPAC8C9.10c	1104	803	1102	1479	5.1963	5.02884	5.14683	5.05096	1090.49	1127.35	1053.63	0.934606	-0.0975705	0.522727	0.704402	NA	NA	0	0	0	0	0	0	0	0	0	0	1
I	3659524	3660197	674	1	SPNCRNA.228	NULL	562	376	531	762	5.11331	4.82528	4.98459	4.98531	538.537	561.387	515.687	0.918594	-0.122501	0.481092	0.668638	NA	NA	0	0	0	0	0	0	0	0	0	0	1
I	3660430	3660717	288	1	SPAC8C9.19	NULL	38	41	69	98	3.08426	3.48569	3.898	3.88382	58.6332	72.574	44.6923	0.615816	-0.699428	0.0445951	0.0995018	NA	NA	0	0	0	0	0	0	0	0	0	0	1
I	3665912	3669087	3176	1	SPAC8C9.14	NULL	3216	2238	6107	7915	5.97193	5.74069	6.85027	6.70404	4574.67	6143.89	3005.45	0.489177	-1.03157	1.02765e-17	1.42943e-16	NA	NA	0	0	0	0	0	0	0	0	0	0	1
I	3673618	3677834	4217	1	SPAC15A10.01	SPAC8C9.17c	3645	2866	2854	4101	5.16519	5.11012	4.7654	4.76803	3316.73	3019.32	3614.15	1.19701	0.259429	0.0197661	0.049003	NA	NA	0	0	0	0	0	0	0	0	0	0	1
I	3677958	3680028	2071	1	SPAC15A10.02	NULL	2515	2291	2844	3446	5.65572	5.81295	5.78622	5.54286	2732.11	2772.79	2691.43	0.970657	-0.0429666	0.818291	0.937376	NA	NA	0	0	0	0	0	0	0	0	0	0	1
I	3685389	3686940	1552	1	SPNCRNA.926	SPAC15A10.05c	166	135	162	249	2.15061	2.1442	2.06857	2.16836	172.388	177.357	167.418	0.943962	-0.0831992	0.682611	0.84501	NA	NA	0	0	0	0	0	0	0	0	0	0	1
I	3688045	3688305	261	1	SPAC15A10.17	NULL	491	350	927	1035	6.28716	6.0906	7.15715	6.79578	667.697	871.296	464.098	0.532653	-0.908733	0.000424292	0.00151538	NA	NA	0	0	0	0	0	0	0	0	0	0	1
I	3688460	3691125	2666	1	SPAC15A10.06	NULL	737	567	921	1472	3.91659	3.83009	4.19127	4.34741	875.981	1029.08	722.884	0.702459	-0.509515	0.000111596	0.000442549	NA	NA	0	0	0	0	0	0	0	0	0	0	1
I	3691307	3692572	1266	1	SPAC15A10.07	NULL	585	486	738	1192	4.26172	4.28605	4.55004	4.72137	712.831	829.2	596.461	0.719321	-0.475291	0.000454976	0.00161536	NA	NA	0	0	0	0	0	0	0	0	0	0	1
I	3692791	3695013	2223	1	SPAC15A10.08	c("SPNCRNA.927", "SPAC15A10.09c")	2463	1845	2478	3631	5.653	5.52802	5.6149	5.64573	2515.9	2647.43	2384.37	0.900636	-0.150983	0.192569	0.336429	NA	NA	0	0	0	0	0	0	0	0	0	0	1
I	3696549	3700027	3479	1	SPAC15A10.10	SPNCRNA.928	839	735	889	1089	3.4209	3.52179	3.45756	3.22994	875.244	871.095	879.394	1.00953	0.0136791	0.883803	0.980299	NA	NA	0	0	0	0	0	0	0	0	0	0	1
I	3700665	3700737	73	1	SPATRNACYS.03	NULL	1	1	0	1	-0.814315	-0.522505	-16.6096	-1.38152	0.747318	0.368314	1.12632	3.05805	1.61261	0.921628	0.999568	NA	NA	0	0	0	0	0	0	0	0	0	0	1
I	3701556	3701628	73	1	SPATRNAPHE.01	NULL	6	0	4	7	1.77063	-16.6096	1.13881	1.4258	3.8334	4.69294	2.97385	0.633687	-0.658158	0.813434	0.93413	NA	NA	0	0	0	0	0	0	0	0	0	0	1
I	3702494	3709127	6634	1	SPAC15A10.11	SPAC15A10.12c	8808	5831	10203	15331	5.78442	5.48116	5.94967	6.01677	9541.95	11040.8	8043.11	0.72849	-0.457018	8.14436e-05	0.000330287	NA	NA	0	0	0	0	0	0	0	0	0	0	1
I	3710527	3713927	3401	1	SPAC15A10.13	c("SPATRNAVAL.04", "SPNCRNA.929", "SPNCRNA.930")	531	364	798	1003	2.83	2.57704	3.37082	3.18032	642.032	791.31	492.754	0.622706	-0.683376	6.0584e-06	2.93601e-05	NA	NA	0	0	0	0	0	0	0	0	0	0	1
I	3710909	3711379	471	1	SPNCRNA.229	SPNCRNA.929	23	19	16	21	1.01947	1.03565	0.449056	0.321012	19.7881	16.1936	23.3827	1.44395	0.530021	0.398937	0.586651	NA	NA	0	0	0	0	0	0	0	0	0	0	1
I	3714084	3716585	2502	1	SPAC15A10.15	SPNCRNA.930	2082	1532	2556	3763	5.21995	5.06921	5.46901	5.50665	2367.71	2737.28	1998.13	0.729968	-0.454096	8.82216e-05	0.000355373	NA	NA	0	0	0	0	0	0	0	0	0	0	1
I	3716643	3720963	4321	1	SPAC15A10.16	NULL	3960	2861	4607	6666	5.24962	5.07245	5.42109	5.43372	4328.98	4890.83	3767.12	0.770241	-0.376619	0.000710561	0.00243354	NA	NA	0	0	0	0	0	0	0	0	0	0	1
I	3722414	3723074	661	1	SPAC15E1.03	NULL	9620	8439	11269	13527	9.72772	9.83057	9.90912	9.65224	10515.2	10939.9	10090.4	0.922344	-0.116623	0.494602	0.680731	NA	NA	0	0	0	0	0	0	0	0	0	0	1
I	3723774	3725936	2163	1	SPAC15E1.04	SPAC15E1.05c	3200	2503	3821	4848	5.94052	5.87792	6.14955	5.97262	3485.17	3805.69	3164.65	0.831556	-0.266114	0.023029	0.0559936	NA	NA	0	0	0	0	0	0	0	0	0	0	1
I	3727303	3728410	1108	1	SPAC15E1.06	SPAC15E1.05c	914	675	833	1249	5.20311	5.05761	5.02237	5.0864	889.572	900.419	878.726	0.975908	-0.0351827	0.802124	0.926282	NA	NA	0	0	0	0	0	0	0	0	0	0	1
I	3729739	3731015	1277	1	SPAC15E1.08	NULL	782	606	1125	1600	5.69649	5.62045	6.17432	6.1621	976.929	1184.07	769.784	0.650116	-0.621232	2.60184e-06	1.33358e-05	NA	NA	0	0	0	0	0	0	0	0	0	0	1
I	3731077	3732340	1264	1	SPAC15E1.09	SPNCRNA.931	1062	934	1723	2172	5.63689	5.74341	6.28817	6.10191	1413.16	1710.9	1115.43	0.651953	-0.617161	4.11912e-06	2.04915e-05	NA	NA	0	0	0	0	0	0	0	0	0	0	1
I	3732274	3733363	1090	1	SPAC15E1.10	c("SPNCRNA.931", "SPNCRNA.932")	625	472	437	657	4.57309	4.45983	4.01001	4.0779	540.238	473.018	607.457	1.28422	0.360889	0.0171827	0.0433595	NA	NA	0	0	0	0	0	0	0	0	0	0	1
I	3735863	3735954	92	1	SPNCRNA.524	NULL	0	0	0	0	-16.6096	-16.6096	-16.6096	-16.6096	0	0	0	NA	NA	NA	NA	NA	NA	0	0	0	0	0	0	0	0	0	0	1
I	3736520	3736592	73	1	SPATRNAARG.02	NULL	4	4	7	7	1.18567	1.47748	1.94616	1.4258	5.39214	6.27899	4.50529	0.717518	-0.478914	0.781787	0.913162	NA	NA	0	0	0	0	0	0	0	0	0	0	1
I	3736525	3743579	7055	1	SPAP7G5.03	SPAP7G5.04c	497	383	825	1023	1.55636	1.47228	2.24065	2.03063	650.418	812.95	487.885	0.600141	-0.736627	6.84423e-07	3.79663e-06	NA	NA	0	0	0	0	0	0	0	0	0	0	1
I	3744043	3744906	864	1	SPAP7G5.05	SPNCRNA.933	7808	5921	12819	16332	8.55133	8.44404	9.21974	9.04879	10198.4	12792.5	7604.23	0.594428	-0.750426	5.84141e-11	5.10708e-10	NA	NA	0	0	0	0	0	0	0	0	0	0	1
I	3745778	3748833	3056	1	SPNCRNA.935	SPNCRNA.934	502	347	319	1279	2.7696	2.52866	2.06862	3.55164	553.691	639.724	467.658	0.731032	-0.451994	0.514148	0.695731	NA	NA	0	0	0	0	0	0	0	0	0	0	1
I	3748767	3751729	2963	1	SPAP7G5.06	NULL	936	697	879	1130	3.71301	3.57947	3.57551	3.41753	892.207	880.909	903.505	1.02565	0.0365398	0.687427	0.849221	NA	NA	0	0	0	0	0	0	0	0	0	0	1
I	3753730	3754811	1082	1	SPNCRNA.230	NULL	0	0	0	0	-16.6096	-16.6096	-16.6096	-16.6096	0	0	0	NA	NA	NA	NA	NA	NA	0	0	0	0	0	0	0	0	0	0	1
I	3761023	3762114	1092	1	SPNCRNA.231	NULL	0	0	0	0	-16.6096	-16.6096	-16.6096	-16.6096	0	0	0	NA	NA	NA	NA	NA	NA	0	0	0	0	0	0	0	0	0	0	1
I	3762865	3763969	1105	1	SPNCRNA.232	NULL	0	0	0	0	-16.6096	-16.6096	-16.6096	-16.6096	0	0	0	NA	NA	NA	NA	NA	NA	0	0	0	0	0	0	0	0	0	0	1
I	3768290	3768363	74	1	SPATRNAILE.03	NULL	0	0	0	0	-16.6096	-16.6096	-16.6096	-16.6096	0	0	0	NA	NA	NA	NA	NA	NA	0	0	0	0	0	0	0	0	0	0	1
I	3769525	3770016	492	1	SPNCRNA.233	NULL	0	0	0	0	-16.6096	-16.6096	-16.6096	-16.6096	0	0	0	NA	NA	NA	NA	NA	NA	0	0	0	0	0	0	0	0	0	0	1
I	3775473	3775847	375	1	SPNCRNA.333	NULL	0	0	0	0	-16.6096	-16.6096	-16.6096	-16.6096	0	0	0	NA	NA	NA	NA	NA	NA	0	0	0	0	0	0	0	0	0	0	1
I	3775854	3776756	903	1	SPNCRNA.396	NULL	0	0	0	0	-16.6096	-16.6096	-16.6096	-16.6096	0	0	0	NA	NA	NA	NA	NA	NA	0	0	0	0	0	0	0	0	0	0	1
I	3776768	3776839	72	1	SPATRNAGLU.04	NULL	0	0	0	0	-16.6096	-16.6096	-16.6096	-16.6096	0	0	0	NA	NA	NA	NA	NA	NA	0	0	0	0	0	0	0	0	0	0	1
I	3777192	3777265	74	1	SPATRNAALA.05	NULL	0	0	0	0	-16.6096	-16.6096	-16.6096	-16.6096	0	0	0	NA	NA	NA	NA	NA	NA	0	0	0	0	0	0	0	0	0	0	1
I	3786105	3787136	1032	1	SPNCRNA.234	NULL	0	0	0	0	-16.6096	-16.6096	-16.6096	-16.6096	0	0	0	NA	NA	NA	NA	NA	NA	0	0	0	0	0	0	0	0	0	0	1
I	3789585	3789948	364	1	SPNCRNA.95	NULL	0	0	0	0	-16.6096	-16.6096	-16.6096	-16.6096	0	0	0	NA	NA	NA	NA	NA	NA	0	0	0	0	0	0	0	0	0	0	1
I	3790912	3791756	845	1	SPAP4C9.02	SPAC1556.01c	1390	1079	1618	2123	6.1671	6.09352	6.33937	6.2109	1503.39	1637.34	1369.45	0.836383	-0.257764	0.0429184	0.0960822	NA	NA	0	0	0	0	0	0	0	0	0	0	1
I	3791897	3793891	1995	1	SPNCRNA.936	SPAC1556.01c	92	89	32	57	0.936881	1.18087	-0.633522	-0.320999	69.8207	37.9118	101.73	2.68332	1.42402	4.07718e-05	0.000172881	NA	NA	0	0	0	0	0	0	0	0	0	0	1
I	3799045	3801693	2649	1	SPAC1556.03	c("SPAC1556.04c", "SPAC1556.05c")	2440	2001	3340	3887	5.3113	5.31696	5.71741	5.41586	2834.4	3197.45	2471.36	0.772917	-0.371616	0.0450881	0.10049	NA	NA	0	0	0	0	0	0	0	0	0	0	1
I	3802551	3804954	2404	1	SPAC1556.06	SPAC1556.05c	729	630	848	1183	3.69482	3.77607	3.86611	3.82606	821.346	884.04	758.652	0.858164	-0.220675	0.0963761	0.191381	NA	NA	0	0	0	0	0	0	0	0	0	0	1
I	3805812	3806987	1176	1	SPAC1556.07	NULL	3438	2384	3379	4702	7.2402	7.00382	7.16837	7.12468	3362.9	3518.24	3207.56	0.911694	-0.133378	0.288986	0.462902	NA	NA	0	0	0	0	0	0	0	0	0	0	1
I	3812515	3815745	3231	1	SPAC1F12.05	SPAC1F12.06c	1963	1589	2342	3254	4.65656	4.64344	4.86439	4.8185	2205.89	2436.67	1975.1	0.810571	-0.30299	0.00902899	0.0243068	NA	NA	0	0	0	0	0	0	0	0	0	0	1
I	3815681	3817165	1485	1	SPAC1F12.07	SPAC1F12.06c	6115	5532	5978	7877	7.41737	7.56464	7.33783	7.21545	6290.73	6061.69	6519.77	1.07557	0.105102	0.412298	0.5999	NA	NA	0	0	0	0	0	0	0	0	0	0	1
I	3817099	3818568	1470	1	SPAC1F12.08	SPNCRNA.937	166	142	599	823	2.41068	2.4772	4.21519	4.15317	395.819	619.805	171.833	0.277238	-1.85081	1.6903e-26	3.17036e-25	NA	NA	0	0	0	0	0	0	0	0	0	0	1
I	3818668	3820526	1859	1	SPAC1F12.09	SPNCRNA.937	970	856	1045	1353	4.50698	4.61842	4.56757	4.41986	1035.72	1050.8	1020.64	0.971289	-0.0420274	0.752862	0.890648	NA	NA	0	0	0	0	0	0	0	0	0	0	1
I	3821682	3824461	2780	1	SPAC4H3.01	c("SPAC4H3.17", "SPAC4H3.02c")	6792	5197	9678	13524	6.75361	6.65927	7.21763	7.18001	8370.87	10097.7	6644.05	0.657977	-0.603892	1.58225e-08	1.09788e-07	NA	NA	0	0	0	0	0	0	0	0	0	0	1
I	3825450	3826227	778	1	SPNCRNA.938	SPAC4H3.02c	10	5	4	10	-0.906187	-1.61436	-2.27493	-1.47339	6.95385	5.79788	8.10982	1.39876	0.484145	0.715163	0.862889	NA	NA	0	0	0	0	0	0	0	0	0	0	1
I	3830380	3830498	119	1	SPRRNA.17	NULL	0	0	0	0	-16.6096	-16.6096	-16.6096	-16.6096	0	0	0	NA	NA	NA	NA	NA	NA	0	0	0	0	0	0	0	0	0	0	1
I	3832332	3835740	3409	1	SPAC4H3.05	SPAC4H3.16	801	639	966	1394	3.35315	3.31897	3.57651	3.58528	912.077	1024.14	800.014	0.781157	-0.356315	0.00711928	0.019664	NA	NA	0	0	0	0	0	0	0	0	0	0	1
I	3835808	3836869	1062	1	SPNCRNA.939	SPAC4H3.16	92	62	64	93	1.84648	1.56893	1.27607	1.29486	76.3951	68.089	84.7013	1.24398	0.314961	0.305535	0.483157	NA	NA	0	0	0	0	0	0	0	0	0	0	1
I	3837306	3839626	2321	1	SPAC4H3.06	SPAC4H3.07c	456	416	513	801	3.12822	3.28759	3.25129	3.37377	527.305	566.235	488.376	0.862497	-0.213409	0.119222	0.228506	NA	NA	0	0	0	0	0	0	0	0	0	0	1
I	3841498	3843136	1639	1	SPAC4H3.08	NULL	1911	1870	214	300	5.597	5.85752	2.3915	2.35849	1175.09	223.633	2126.54	9.50909	3.24931	4.91681e-24	8.54145e-23	NA	NA	0	0	0	0	0	0	0	0	0	0	1
I	3843366	3844124	759	1	SPAC4H3.09	NULL	729	548	470	710	5.94568	5.82575	5.26557	5.34036	608.46	509.985	706.936	1.38619	0.471125	0.00131647	0.00427916	NA	NA	0	0	0	0	0	0	0	0	0	0	1
I	3846748	3847768	1021	1	SPNCRNA.941	NULL	385	385	610	747	3.96843	4.26025	4.58553	4.35746	515.631	597.629	433.634	0.725591	-0.462771	0.0203454	0.0502937	NA	NA	0	0	0	0	0	0	0	0	0	0	1
I	3846893	3847670	778	1	SPNCRNA.236	NULL	374	378	606	736	4.31875	4.62592	4.96818	4.7282	507.615	591.462	423.767	0.716474	-0.481014	0.0211808	0.0520692	NA	NA	0	0	0	0	0	0	0	0	0	0	1
I	3851006	3851107	102	1	SPNCRNA.510	NULL	7343	7756	12234	20102	11.5452	11.916	12.2348	12.4309	11201.4	13871.8	8531.06	0.614994	-0.701357	0.000311244	0.00114517	NA	NA	0	0	0	0	0	0	0	0	0	0	1
I	3851024	3851310	287	1	SPNCRNA.942	NULL	5361	5782	8023	13625	9.59886	9.99974	10.1336	10.3773	7781.82	9259.92	6303.73	0.680755	-0.554793	0.0115055	0.030228	NA	NA	0	0	0	0	0	0	0	0	0	0	1
I	3852887	3853574	688	1	SPAC4H3.13	SPAC4H3.14c	536	391	499	781	5.18655	5.0233	5.0365	5.16242	531.864	551.467	512.26	0.928904	-0.106398	0.47454	0.662595	NA	NA	0	0	0	0	0	0	0	0	0	0	1
I	3858241	3861822	3582	1	SPAC1071.02	SPAC1071.03c	2277	1647	2747	3983	4.80474	4.62926	5.02861	5.04425	2543.3	2919.29	2167.31	0.742408	-0.429715	0.000208641	0.000787092	NA	NA	0	0	0	0	0	0	0	0	0	0	1
I	3863704	3864395	692	1	SPNCRNA.237	SPNCRNA.943	10	10	7	12	-0.737191	-0.445382	-1.29861	-1.04137	9.69189	8.12056	11.2632	1.387	0.471968	0.675322	0.840429	NA	NA	0	0	0	0	0	0	0	0	0	0	1
I	3864467	3866158	1692	1	SPAC1071.05	SPNCRNA.943	2864	2311	4191	5871	6.13479	6.11709	6.63719	6.60314	3627.56	4378.09	2877.02	0.657141	-0.605726	4.56672e-08	2.97929e-07	NA	NA	0	0	0	0	0	0	0	0	0	0	1
I	3866536	3868410	1875	1	SPAC1071.06	SPAC1071.07c	2509	2144	2993	4222	5.79571	5.86071	6.00333	5.9793	2866.56	3137.38	2595.74	0.827362	-0.27341	0.013094	0.0340218	NA	NA	0	0	0	0	0	0	0	0	0	0	1
I	3869082	3869610	529	1	SPAC1071.08	SPAC1071.09c	9571	7402	17950	26644	9.83507	9.75613	10.6955	10.7449	14357.7	19303.3	9412.09	0.487591	-1.03626	4.46914e-23	7.5988e-22	NA	NA	0	0	0	0	0	0	0	0	0	0	1
I	3875656	3876105	450	1	SPNCRNA.92	SPAC1071.10c	0	0	0	0	-16.6096	-16.6096	-16.6096	-16.6096	0	0	0	NA	NA	NA	NA	NA	NA	0	0	0	0	0	0	0	0	0	0	1
I	3876757	3877223	467	1	SPNCRNA.93	SPNCRNA.944	2	0	2	0	-2.49171	-16.6096	-2.53857	-16.6096	1.02433	1.05737	0.991284	0.937499	-0.0931114	1	1	NA	NA	0	0	0	0	0	0	0	0	0	0	1
I	3878007	3881812	3806	1	SPAC1071.13	SPNCRNA.945	571	461	676	896	2.63877	2.62186	2.83545	2.72156	630.578	687.4	573.755	0.834674	-0.260715	0.0798357	0.163429	NA	NA	0	0	0	0	0	0	0	0	0	0	1
I	3879508	3880008	501	1	SPNCRNA.94	SPNCRNA.945	77	57	49	109	2.67361	2.53152	1.97468	2.60779	70.0825	66.0518	74.1132	1.12205	0.166133	0.728184	0.869987	NA	NA	0	0	0	0	0	0	0	0	0	0	1
I	3882010	3884256	2247	1	SPAC1071.11	SPAC1071.12c	1351	1190	675	1007	4.64151	4.75026	3.59359	3.65033	1073.94	727.755	1420.12	1.95137	0.964491	2.74935e-13	2.96791e-12	NA	NA	0	0	0	0	0	0	0	0	0	0	1
I	3884439	3887309	2871	1	SPAC926.02	c("SPNCRNA.946", "SPAC926.10")	839	651	1253	1650	3.68128	3.60708	4.21306	4.08978	1048.29	1270.16	826.417	0.650639	-0.62007	2.72078e-06	1.38861e-05	NA	NA	0	0	0	0	0	0	0	0	0	0	1
I	3887243	3888497	1255	1	SPAC926.03	NULL	593	486	549	728	4.2939	4.29864	4.13582	4.02259	579.404	558.381	600.426	1.0753	0.104738	0.461278	0.648458	NA	NA	0	0	0	0	0	0	0	0	0	0	1
I	3892032	3892999	968	1	SPNCRNA.947	SPAC926.05c	118	86	65	128	2.33927	2.1747	1.43214	1.88941	97.1165	81.5087	112.724	1.38297	0.467772	0.123366	0.234911	NA	NA	0	0	0	0	0	0	0	0	0	0	1
I	3912696	3914761	2066	1	SPAC323.04	SPAC323.05c	3901	3059	3431	4556	6.50907	6.4501	6.277	6.16578	3677.35	3491.96	3862.75	1.10619	0.145593	0.161003	0.291946	NA	NA	0	0	0	0	0	0	0	0	0	0	1
I	3914874	3915677	804	1	SPNCRNA.948	c("SPAC323.05c", "SPAC323.06c")	86	77	84	114	2.1507	2.28304	2.0699	1.99011	88.7925	86.3973	91.1876	1.05544	0.0778507	0.826436	0.942129	NA	NA	0	0	0	0	0	0	0	0	0	0	1
I	3921018	3921711	694	1	SPAC323.08	NULL	364	271	476	547	4.44449	4.31066	4.78466	4.46487	402.225	453.122	351.328	0.77535	-0.36708	0.0729759	0.15146	NA	NA	0	0	0	0	0	0	0	0	0	0	1
I	3922354	3923496	1143	1	SPAC2F3.01	NULL	968	750	987	1581	5.13574	5.05944	5.11693	5.27628	1028.45	1104.12	952.792	0.862945	-0.21266	0.0852064	0.172773	NA	NA	0	0	0	0	0	0	0	0	0	0	1
I	3924624	3927430	2807	1	SPAC2F3.02	SPAC2F3.03c	1516	1271	1695	2445	4.48673	4.52423	4.60089	4.60907	1674.82	1796.65	1552.99	0.86438	-0.210262	0.0701076	0.146437	NA	NA	0	0	0	0	0	0	0	0	0	0	1
I	3935124	3938149	3026	1	SPAC2F3.08	c("SPAC2F3.07c", "SPNCRNA.949")	1737	1259	781	1249	4.63952	4.46701	3.43946	3.59647	1263.94	872.927	1654.96	1.89587	0.92286	3.11774e-13	3.35352e-12	NA	NA	0	0	0	0	0	0	0	0	0	0	1
I	3938842	3939103	262	1	SPNCRNA.950	SPNCRNA.949	1	1	0	3	-2.65785	-2.36605	-16.6096	-1.64015	1.11563	1.10494	1.12632	1.01935	0.0276507	1	1	NA	NA	0	0	0	0	0	0	0	0	0	0	1
I	3939598	3942086	2489	1	SPAC2F3.09	c("SPNCRNA.949", "SPAC2F3.18c")	5281	3938	8526	12028	6.46073	6.3292	7.10493	7.08102	7019.38	8937.65	5101.1	0.570743	-0.809086	6.13787e-14	6.93776e-13	NA	NA	0	0	0	0	0	0	0	0	0	0	1
I	3943042	3946427	3386	1	SPAC2F3.10	NULL	1971	1489	2400	3344	4.59483	4.48206	4.83208	4.79026	2208.24	2500.49	1915.99	0.766248	-0.384116	0.00112637	0.00370539	NA	NA	0	0	0	0	0	0	0	0	0	0	1
I	3946546	3947987	1442	1	SPAC2F3.11	c("SPAC2F3.13c", "SPAC2F3.12c")	3297	2463	4475	6186	6.61121	6.48229	7.00509	6.95185	3915.88	4644.26	3187.5	0.686331	-0.543023	1.21499e-06	6.49366e-06	NA	NA	0	0	0	0	0	0	0	0	0	0	1
I	3951825	3952588	764	1	SPNCRNA.951	NULL	46	46	51	53	1.32162	1.61344	1.42363	0.958765	49.1472	46.4836	51.8108	1.1146	0.156532	0.681088	0.844083	NA	NA	0	0	0	0	0	0	0	0	0	0	1
I	3951825	3952600	776	1	SPNCRNA.239	NULL	46	46	51	53	1.29914	1.59095	1.40115	0.936281	49.1472	46.4836	51.8108	1.1146	0.156532	0.681088	0.844083	NA	NA	0	0	0	0	0	0	0	0	0	0	1
I	3953281	3953856	576	1	SPNCRNA.240	NULL	42	34	23	31	1.59788	1.58484	0.682275	0.592547	32.9188	23.5775	42.2601	1.79239	0.841886	0.0762368	0.156846	NA	NA	0	0	0	0	0	0	0	0	0	0	1
I	3953832	3956869	3038	1	SPAC2F3.15	NULL	1289	1067	1038	1576	4.21818	4.2373	3.85887	3.94097	1220.53	1129.24	1311.82	1.16168	0.216219	0.103882	0.203977	NA	NA	0	0	0	0	0	0	0	0	0	0	1
I	3957085	3959427	2343	1	SPAC2F3.16	NULL	2135	1647	1776	2493	5.36069	5.27811	5.04823	5.01712	1977.04	1857.15	2096.93	1.12911	0.175185	0.125641	0.238341	NA	NA	0	0	0	0	0	0	0	0	0	0	1
I	3959727	3962914	3188	1	SPAC11G7.01	NULL	2998	2261	3974	5717	5.28683	5.17161	5.64657	5.65087	3559.27	4206.65	2911.9	0.692215	-0.530708	1.97296e-06	1.02927e-05	NA	NA	0	0	0	0	0	0	0	0	0	0	1
I	3963058	3966172	3115	1	SPAC11G7.02	NULL	6507	5126	7072	9890	6.55592	6.50358	6.62919	6.59268	6919.75	7381.49	6458.01	0.874893	-0.192822	0.0738576	0.152965	NA	NA	0	0	0	0	0	0	0	0	0	0	1
I	3966740	3968132	1393	1	SPAC11G7.03	NULL	4242	3500	3722	5002	6.98203	6.99646	6.74651	6.65258	4059.98	3810.07	4309.89	1.13118	0.177834	0.0993366	0.196545	NA	NA	0	0	0	0	0	0	0	0	0	0	1
I	3968932	3969558	627	1	SPAC11G7.04	SPAC11G7.05c	7553	7010	8794	12706	8.966	9.15018	9.13861	9.14917	8746.85	9329.05	8164.65	0.875186	-0.192339	0.066609	0.140055	NA	NA	0	0	0	0	0	0	0	0	0	0	1
I	3974310	3976265	1956	1	SPAPB18E9.01	c("SPAC11G7.06c", "SPNCRNA.952", "SPAPB18E9.02c")	1367	976	1724	2366	5.20451	5.01026	5.4924	5.42872	1537.99	1782.88	1293.09	0.725278	-0.463394	0.000215544	0.000811094	NA	NA	0	0	0	0	0	0	0	0	0	0	1
I	3981077	3982894	1818	1	SPNCRNA.953	c("SPAPB18E9.02c", "SPAPB18E9.04c")	939	709	402	786	4.42233	4.3088	3.15155	3.59852	707.293	502.026	912.56	1.81775	0.862157	5.23e-07	2.94608e-06	NA	NA	0	0	0	0	0	0	0	0	0	0	1
I	3991342	3993560	2219	1	SPNCRNA.954	c("SPAPB15E9.01c", "SPAPB15E9.02c")	464	410	693	847	3.11777	3.23109	3.64965	3.41879	583.449	678.341	488.557	0.720223	-0.473484	0.00272561	0.00826219	NA	NA	0	0	0	0	0	0	0	0	0	0	1
I	3993495	3995104	1610	1	SPAPB15E9.06	SPAPB15E9.02c	202	179	187	253	2.38085	2.49827	2.22268	2.13842	202.53	192.048	213.011	1.10916	0.149468	0.495294	0.681402	NA	NA	0	0	0	0	0	0	0	0	0	0	1
I	4001693	4003982	2290	1	SPAC27E2.01	NULL	1015	857	1432	1817	4.30138	4.34908	4.75107	4.57424	1234.94	1426.3	1043.57	0.73166	-0.450754	0.000420798	0.0015038	NA	NA	0	0	0	0	0	0	0	0	0	0	1
I	4004221	4005792	1572	1	SPAC27E2.02	c("SPNCRNA.955", "SPAC27E2.03c")	1119	964	1649	2022	5.03893	5.11564	5.55146	5.32529	1389.57	1616.53	1162.6	0.719193	-0.475549	0.001418	0.0045831	NA	NA	0	0	0	0	0	0	0	0	0	0	1
I	4008511	4008693	183	1	SPAC27E2.13	c("SPNCRNA.53", "SPAC27E2.11c")	0	0	1	0	-16.6096	-16.6096	-2.18701	-16.6096	0.264343	0.528686	0	0	#NAME?	1	1	NA	NA	0	0	0	0	0	0	0	0	0	0	1
I	4010913	4011317	405	1	SPAC27E2.12	SPAC27E2.04c	1	1	0	0	-2.47618	-2.18438	-16.6096	-16.6096	0.563161	0	1.12632	Inf	Inf	0.69034	0.850227	NA	NA	0	0	0	0	0	0	0	0	0	0	1
I	4015050	4016557	1508	1	SPAC27E2.05	SPAC27E2.06c	658	520	717	946	4.22666	4.1789	4.30369	4.1832	690.789	727.492	654.086	0.899097	-0.153451	0.309922	0.487481	NA	NA	0	0	0	0	0	0	0	0	0	0	1
I	4019873	4022054	2182	1	SPAC27E2.07	NULL	515	369	515	780	3.29248	3.10334	3.24562	3.32416	523.767	559.558	487.977	0.872076	-0.197475	0.201675	0.349064	NA	NA	0	0	0	0	0	0	0	0	0	0	1
I	4022492	4026493	4002	1	SPAC27E2.08	NULL	0	0	0	0	-16.6096	-16.6096	-16.6096	-16.6096	0	0	0	NA	NA	NA	NA	NA	NA	0	0	0	0	0	0	0	0	0	0	1
I	4027002	4034337	7336	1	SPAC27E2.09	SPAC27E2.10c	4479	2924	5003	6933	4.66367	4.34025	4.77643	4.72675	4631.31	5198.53	4064.09	0.781776	-0.355172	0.00665908	0.0185122	NA	NA	0	0	0	0	0	0	0	0	0	0	1
I	4047209	4049353	2145	1	SPAC19G12.03	SPAC19G12.02c	883	732	831	1347	4.12627	4.14751	3.99185	4.16831	917.383	935.456	899.31	0.96136	-0.0568517	0.571178	0.751388	NA	NA	0	0	0	0	0	0	0	0	0	0	1
I	4049307	4050971	1665	1	SPAC19G12.04	c("SPAC19G12.02c", "SPNCRNA.956")	278	229	371	489	2.79312	2.8052	3.1626	3.04065	329.231	376.248	282.214	0.750076	-0.414892	0.0199402	0.0493835	NA	NA	0	0	0	0	0	0	0	0	0	0	1
I	4050905	4052174	1270	1	SPAC19G12.05	NULL	5579	3776	7197	9984	7.51066	7.23933	7.8312	7.78306	6314.41	7482.19	5146.64	0.687851	-0.539832	1.07643e-06	5.8126e-06	NA	NA	0	0	0	0	0	0	0	0	0	0	1
I	4056794	4058815	2022	1	SPAC19G12.08	NULL	2477	1960	3444	5000	5.88997	5.84405	6.31861	6.33609	3063.1	3662.36	2463.84	0.672746	-0.571866	3.19493e-07	1.85814e-06	NA	NA	0	0	0	0	0	0	0	0	0	0	1
I	4059980	4061192	1213	1	SPAC19G12.09	NULL	4215	3387	2040	3548	7.17244	7.14873	6.07862	6.35669	3305.27	2385.3	4225.25	1.77137	0.824867	8.45735e-13	8.73683e-12	NA	NA	0	0	0	0	0	0	0	0	0	0	1
I	4066981	4068474	1494	1	SPAC19G12.11	NULL	2363	1995	2101	2697	6.03692	6.08451	5.82052	5.66044	2266.76	2104.11	2429.41	1.1546	0.207395	0.0646069	0.136611	NA	NA	0	0	0	0	0	0	0	0	0	0	1
I	4068498	4069929	1432	1	SPAC19G12.12	SPAC19G12.13c	597	531	714	1022	4.11326	4.23605	4.32459	4.32163	692.344	753.898	630.79	0.836704	-0.257211	0.0579951	0.124785	NA	NA	0	0	0	0	0	0	0	0	0	0	1
I	4072137	4075036	2900	1	SPAC19G12.14	SPAC19G12.15c	1948	1571	2370	3202	4.87752	4.85903	5.11356	5.02728	2194.32	2432.33	1956.31	0.804296	-0.314201	0.00745477	0.0205057	NA	NA	0	0	0	0	0	0	0	0	0	0	1
I	4083624	4084596	973	1	SPAC23A1.03	SPAC23A1.04c	2007	1850	5634	7068	6.7115	6.8858	8.15376	7.96054	3871.68	5581.86	2161.51	0.387239	-1.3687	9.88166e-18	1.37769e-16	NA	NA	0	0	0	0	0	0	0	0	0	0	1
I	4088693	4089782	1090	1	SPAC23A1.05	NULL	1144	801	1459	2189	5.44524	5.22284	5.74928	5.81421	1324.89	1577.59	1072.19	0.679637	-0.557163	9.40949e-06	4.41734e-05	NA	NA	0	0	0	0	0	0	0	0	0	0	1
I	4092110	4093122	1013	1	SPAC23A1.07	SPAC23A1.06c	590	440	880	1219	4.59564	4.46424	5.12557	5.07533	742.073	914.218	569.928	0.623405	-0.681758	1.51647e-06	8.01222e-06	NA	NA	0	0	0	0	0	0	0	0	0	0	1
I	4093921	4095148	1228	1	SPAC23A1.09	SPNCRNA.957	1641	1133	1577	2306	5.79375	5.55114	5.6895	5.71735	1605.49	1683.07	1527.91	0.907812	-0.139535	0.284081	0.45669	NA	NA	0	0	0	0	0	0	0	0	0	0	1
I	4095134	4096584	1451	1	SPAC23A1.10	SPNCRNA.957	4230	3940	4077	5883	6.91909	7.10845	6.81909	6.82777	4451.84	4322.24	4581.45	1.05997	0.0840239	0.603664	0.77601	NA	NA	0	0	0	0	0	0	0	0	0	0	1
I	4097268	4098123	856	1	SPAC23A1.11	NULL	4351	3008	6005	7608	7.81696	7.57623	8.23492	8.05591	5015.26	5976.89	4053.63	0.678217	-0.560182	6.25952e-05	0.000258744	NA	NA	0	0	0	0	0	0	0	0	0	0	1
I	4106634	4106726	93	1	SPNCRNA.341	NULL	4	7	7	6	0.836334	1.9355	1.59683	0.854078	6.15401	5.91068	6.39733	1.08233	0.114146	1	1	NA	NA	0	0	0	0	0	0	0	0	0	0	1
I	4106702	4112044	5343	1	SPAC23A1.17	SPAC23A1.18c	5901	3584	5798	7957	5.51879	5.09122	5.44653	5.38284	5590.57	5995.99	5185.14	0.864768	-0.209615	0.313394	0.491698	NA	NA	0	0	0	0	0	0	0	0	0	0	1
I	4119431	4121874	2444	1	SPAC26H5.03	SPNCRNA.959	813	633	1220	1657	3.91138	3.84215	4.45008	4.37141	1028.73	1255.29	802.178	0.639037	-0.646029	9.57782e-07	5.20943e-06	NA	NA	0	0	0	0	0	0	0	0	0	0	1
I	4121876	4124737	2862	1	SPAC26H5.04	SPNCRNA.960	1185	958	1269	1950	4.10335	4.08837	4.1553	4.25472	1290.32	1389.11	1191.53	0.857761	-0.221352	0.0631505	0.134004	NA	NA	0	0	0	0	0	0	0	0	0	0	1
I	4125000	4128805	3806	1	SPAC26H5.05	SPNCRNA.961	4482	3092	4156	6215	5.61135	5.36756	5.45555	5.51575	4328.91	4486.29	4171.53	0.929841	-0.104945	0.374194	0.561128	NA	NA	0	0	0	0	0	0	0	0	0	0	1
I	4129145	4132350	3206	1	SPAC26H5.06	c("SPNCRNA.961", "SPAC26H5.07c")	871	775	1298	1704	3.54956	3.6729	4.07825	3.95052	1117.16	1313.84	920.482	0.700604	-0.513329	5.86134e-05	0.000243122	NA	NA	0	0	0	0	0	0	0	0	0	0	1
I	4136046	4137000	955	1	SPNCRNA.962	NULL	32	23	25	44	0.476138	0.291515	0.0731417	0.368352	29.8946	29.4229	30.3662	1.03206	0.0455247	0.989206	1	NA	NA	0	0	0	0	0	0	0	0	0	0	1
I	4136052	4137107	1056	1	SPNCRNA.306	NULL	32	23	25	44	0.331102	0.146479	-0.0718941	0.223316	29.8946	29.4229	30.3662	1.03206	0.0455247	0.989206	1	NA	NA	0	0	0	0	0	0	0	0	0	0	1
I	4140077	4141041	965	1	SPNCRNA.963	NULL	105	92	89	110	2.17535	2.27648	1.88998	1.67525	98.8163	87.5675	110.065	1.25692	0.329888	0.235857	0.39592	NA	NA	0	0	0	0	0	0	0	0	0	0	1
I	4142849	4147291	4443	1	SPAC26H5.11	SPNCRNA.964	3079	2225	4153	5465	4.86274	4.6859	5.24758	5.12328	3568.91	4208.47	2929.35	0.69606	-0.522716	5.11073e-06	2.51122e-05	NA	NA	0	0	0	0	0	0	0	0	0	0	1
I	4147643	4151509	3867	1	SPAC26H5.12	SPAC26H5.13c	2518	2082	2664	3959	4.75655	4.77405	4.79101	4.84219	2713.84	2866.57	2561.1	0.893438	-0.162561	0.130188	0.245373	NA	NA	0	0	0	0	0	0	0	0	0	0	1
I	4154360	4154694	335	1	SPNCRNA.242	SPNCRNA.965	4088	4191	10649	12807	8.98465	9.31236	10.319	10.0649	7508.17	10347	4669.37	0.451279	-1.14791	1.29262e-07	7.93284e-07	NA	NA	0	0	0	0	0	0	0	0	0	0	1
I	4154912	4155002	91	1	SPSNORNA.13	NULL	94757	70148	44141	63120	15.3996	15.2576	14.2507	14.2463	68895.6	46584.7	91206.5	1.95787	0.969282	3.28212e-21	5.2955e-20	NA	NA	0	0	0	0	0	0	0	0	0	0	1
I	4155465	4156320	856	1	SPAC25B8.01	NULL	500	372	364	654	4.5998	4.46499	4.09496	4.41995	457.876	433.319	482.434	1.11335	0.154904	0.407234	0.595279	NA	NA	0	0	0	0	0	0	0	0	0	0	1
I	4156472	4157726	1255	1	SPAC25B8.02	NULL	258	284	683	728	3.09324	3.52358	4.4509	4.02259	468.107	629.225	306.989	0.487884	-1.03539	0.00224297	0.00692149	NA	NA	0	0	0	0	0	0	0	0	0	0	1
I	4157827	4160623	2797	1	SPAC25B8.03	SPAC25B8.04c	2721	1916	2603	3913	5.33574	5.12152	5.22492	5.29266	2687.2	2817.38	2557.03	0.90759	-0.139887	0.235405	0.395715	NA	NA	0	0	0	0	0	0	0	0	0	0	1
I	4162277	4164207	1931	1	SPAC25B8.05	c("SPAC25B8.04c", "SPAC25B8.06c")	1067	810	1766	2451	4.5197	4.41394	5.19977	5.15229	1438.05	1836.4	1039.7	0.566164	-0.820708	4.21437e-11	3.74181e-10	NA	NA	0	0	0	0	0	0	0	0	0	0	1
I	4166658	4167704	1047	1	SPAC25B8.20	SPAC25B8.07c	272	187	356	438	3.58797	3.33921	3.92938	3.70807	301.143	349.533	252.752	0.723112	-0.467709	0.015864	0.04038	NA	NA	0	0	0	0	0	0	0	0	0	0	1
I	4168212	4170189	1978	1	SPAC25B8.08	NULL	1016	779	1194	1609	4.41434	4.32295	4.60039	4.51039	1109.37	1223.87	994.872	0.812892	-0.298864	0.0238855	0.0578069	NA	NA	0	0	0	0	0	0	0	0	0	0	1
I	4170166	4170605	440	1	SPNCRNA.966	SPNCRNA.967	140	116	93	96	3.72341	3.74392	3.08643	2.61187	113.537	84.5259	142.549	1.68645	0.753991	0.00306051	0.00918919	NA	NA	0	0	0	0	0	0	0	0	0	0	1
I	4170550	4171657	1108	1	SPAC25B8.09	SPNCRNA.967	1163	953	984	1279	5.44538	5.44989	5.1574	5.01532	1084.38	991.3	1177.47	1.1878	0.248297	0.0467509	0.103766	NA	NA	0	0	0	0	0	0	0	0	0	0	1
I	4172123	4173547	1425	1	SPAC25B8.10	SPNCRNA.967	3422	2641	2394	3482	6.63936	6.55742	6.07709	6.09722	2954.93	2548.14	3361.71	1.31928	0.399752	0.000372781	0.00134785	NA	NA	0	0	0	0	0	0	0	0	0	0	1
I	4173674	4176378	2705	1	SPAC25B8.11	NULL	2569	1670	2995	4336	5.32581	4.99626	5.5003	5.51375	2753.48	3180.42	2326.54	0.73152	-0.451031	0.000232977	0.000870418	NA	NA	0	0	0	0	0	0	0	0	0	0	1
I	4185113	4187416	2304	1	SPAC25B8.14	SPAC25B8.15c	1604	1096	1640	2052	4.85302	4.59541	4.83818	4.64116	1554.53	1622.82	1486.24	0.915833	-0.126844	0.498103	0.684357	NA	NA	0	0	0	0	0	0	0	0	0	0	1
I	4187325	4189859	2535	1	SPAC25B8.16	SPAC25B8.15c	1977	1491	2732	3822	5.01681	4.90159	5.4366	5.40061	2386.15	2852.06	1920.23	0.673277	-0.570728	9.36005e-07	5.09792e-06	NA	NA	0	0	0	0	0	0	0	0	0	0	1
I	4190288	4191481	1194	1	SPAC25B8.17	NULL	762	600	998	1485	4.72755	4.67453	5.06994	5.12293	915.331	1074.57	756.087	0.703616	-0.50714	0.000123905	0.00048734	NA	NA	0	0	0	0	0	0	0	0	0	0	1
I	4191410	4192157	748	1	SPAC25B8.18	SPAC25B8.19c	301	287	228	288	4.06221	4.28531	3.61463	3.4313	278.404	226.615	330.194	1.45707	0.543071	0.00374776	0.0110509	NA	NA	0	0	0	0	0	0	0	0	0	0	1
I	4195642	4196021	380	1	SPAC683.03	NULL	2	0	0	6	-2.1943	-16.6096	-16.6096	-1.17659	1.60058	2.20988	0.991284	0.448569	-1.1566	0.764885	0.900675	NA	NA	0	0	0	0	0	0	0	0	0	0	1
I	4197369	4199832	2464	1	SPNCRNA.969	c("SPAC683.02c", "SPNCRNA.970")	333	278	241	310	2.48808	2.51946	1.97474	1.81761	290.984	241.59	340.378	1.4089	0.494574	0.00614479	0.0172341	NA	NA	0	0	0	0	0	0	0	0	0	0	1
I	4200148	4205612	5465	1	SPAC694.02	SPNCRNA.971	30531	22112	38738	57464	7.85747	7.68383	8.15408	8.20263	35361.5	41645	29078.1	0.698236	-0.518213	5.77766e-07	3.23787e-06	NA	NA	0	0	0	0	0	0	0	0	0	0	1
I	4205733	4207777	2045	1	SPAC694.03	c("SPNCRNA.971", "SPAC694.04c")	346	266	338	501	2.85956	2.77203	2.77895	2.82638	351.237	363.221	339.253	0.934013	-0.098485	0.565644	0.746973	NA	NA	0	0	0	0	0	0	0	0	0	0	1
I	4209000	4212436	3437	1	SPNCRNA.972	SPAC694.06c	222	175	186	304	1.42297	1.37158	1.12086	1.30927	215.352	210.303	220.402	1.04802	0.0676662	0.808379	0.930551	NA	NA	0	0	0	0	0	0	0	0	0	0	1
I	4219677	4222702	3026	1	SPAC1F7.03	SPAC1F7.14c	3098	2458	4137	5779	5.40941	5.36737	5.7798	5.74167	3700.68	4315.66	3085.71	0.715004	-0.483977	1.28091e-05	5.88897e-05	NA	NA	0	0	0	0	0	0	0	0	0	0	1
I	4223778	4225824	2047	1	SPAC1F7.04	NULL	7805	6056	8279	11535	7.56083	7.48661	7.59904	7.55716	8156.69	8625.49	7687.89	0.891299	-0.166019	0.126569	0.23968	NA	NA	0	0	0	0	0	0	0	0	0	0	1
I	4226958	4229989	3032	1	SPAC1F7.05	NULL	17899	14688	23309	33796	8.09581	8.10238	8.42996	8.44556	21452.8	24770.7	18134.9	0.732113	-0.449861	1.07093e-05	4.97692e-05	NA	NA	0	0	0	0	0	0	0	0	0	0	1
I	4230615	4232557	1943	1	SPAC1F7.06	SPNCRNA.973	52	38	46	64	0.151867	-0.00882968	-0.0718644	-0.115789	48.8154	47.8916	49.7392	1.03858	0.0546115	0.894997	0.984652	NA	NA	0	0	0	0	0	0	0	0	0	0	1
I	4231812	4232976	1165	1	SPNCRNA.243	SPNCRNA.973	42	35	38	40	0.581697	0.610477	0.390453	-0.0559052	38.8567	34.8226	42.8908	1.23169	0.300644	0.462695	0.649853	NA	NA	0	0	0	0	0	0	0	0	0	0	1
I	4235080	4237874	2795	1	SPAC1F7.08	NULL	7309	4664	2094	8474	6.76231	6.40602	4.91204	6.40846	5396.15	4228.16	6564.14	1.55248	0.634577	0.34942	0.532154	NA	NA	0	0	0	0	0	0	0	0	0	0	1
I	4238306	4238401	96	1	SPSNORNA.14	NULL	2	0	0	0	-0.209461	-16.6096	-16.6096	-16.6096	0.495642	0	0.991284	Inf	Inf	0.704935	0.859966	NA	NA	0	0	0	0	0	0	0	0	0	0	1
I	4243421	4244823	1403	1	SPAC1F7.10	c("SPAC1F7.09c", "SPAC1F7.11c")	674	467	470	731	4.31779	4.08028	3.75085	3.8677	573.155	517.719	628.59	1.21415	0.27995	0.0567479	0.122496	NA	NA	0	0	0	0	0	0	0	0	0	0	1
I	4248777	4250231	1455	1	SPAC1F7.12	NULL	2899	2137	2195	3202	6.37002	6.22187	5.92183	5.94622	2562.22	2339.81	2784.63	1.19011	0.251097	0.0248194	0.0597088	NA	NA	0	0	0	0	0	0	0	0	0	0	1
I	4254672	4255695	1024	1	SPAC21E11.04	SPAC21E11.05c	3309	2755	732	960	7.06766	7.09514	4.84433	4.71516	2059.09	740.579	3377.6	4.56076	2.18927	1.29893e-71	4.48057e-70	NA	NA	0	0	0	0	0	0	0	0	0	0	1
I	4257687	4259783	2097	1	SPAC21E11.06	SPNCRNA.13	3981	3021	5118	7733	6.30029	6.194	6.61588	6.69097	4716.21	5553.98	3878.44	0.698316	-0.518047	1.68765e-06	8.87753e-06	NA	NA	0	0	0	0	0	0	0	0	0	0	1
I	4259954	4261207	1254	1	SPAC21E11.07	NULL	352	279	498	811	3.6073	3.56381	4.06102	4.24421	456.207	561.988	350.426	0.623547	-0.68143	1.21565e-05	5.6018e-05	NA	NA	0	0	0	0	0	0	0	0	0	0	1
I	4261533	4263964	2432	1	SPAC21E11.08	SPAC2C4.03c	4917	3833	6491	9738	6.39112	6.32363	6.74493	6.80975	5936.4	7018.34	4854.47	0.691684	-0.531815	5.97077e-07	3.3414e-06	NA	NA	0	0	0	0	0	0	0	0	0	0	1
I	4265149	4265245	97	1	SPATRNASER.03	NULL	4	10	15	24	0.77558	2.38932	2.63561	2.79332	12.5296	16.7698	8.28937	0.494303	-1.01653	0.164177	0.296403	NA	NA	0	0	0	0	0	0	0	0	0	0	1
I	4265253	4265324	72	1	SPATRNAMET.03	NULL	0	0	0	0	-16.6096	-16.6096	-16.6096	-16.6096	0	0	0	NA	NA	NA	NA	NA	NA	0	0	0	0	0	0	0	0	0	0	1
I	4267059	4268079	1021	1	SPAC2C4.05	NULL	2327	2084	2112	2888	6.69246	6.82516	6.50574	6.43684	2323.99	2180.27	2467.7	1.13183	0.178656	0.136345	0.255173	NA	NA	0	0	0	0	0	0	0	0	0	0	1
I	4268566	4269064	499	1	SPNCRNA.98	NULL	700850	639195	433286	748085	15.8313	15.9903	15.0907	15.3582	627550	504602	750498	1.48731	0.572703	0.00167033	0.0053086	NA	NA	0	0	0	0	0	0	0	0	0	0	1
I	4275060	4275902	843	1	SPAC2C4.08	NULL	233	191	161	216	3.52028	3.52534	2.94016	2.84377	200.309	164.674	235.945	1.4328	0.518834	0.01283	0.0333791	NA	NA	0	0	0	0	0	0	0	0	0	0	1
I	4276009	4277492	1484	1	SPAC2C4.09	SPAC2C4.10c	906	648	864	1333	4.77679	4.58508	4.66145	4.76666	902.74	947.746	857.733	0.905023	-0.143973	0.283936	0.456518	NA	NA	0	0	0	0	0	0	0	0	0	0	1
I	4281426	4284515	3090	1	SPAC2C4.13	c("SPAC2C4.12c", "SPAC2C4.14c")	2186	1622	2172	3201	4.87617	4.73747	4.82005	4.85918	2216.86	2327.28	2106.44	0.905108	-0.143838	0.222032	0.378161	NA	NA	0	0	0	0	0	0	0	0	0	0	1
I	4291999	4292912	914	1	SPNCRNA.974	SPNCRNA.975	132	108	68	84	2.58383	2.58614	1.58005	1.36454	100.214	66.889	133.538	1.99642	0.997413	0.000335212	0.00122455	NA	NA	0	0	0	0	0	0	0	0	0	0	1
I	4294279	4294816	538	1	SPNCRNA.976	NULL	86	78	113	145	2.73029	2.88124	3.07735	2.91671	102.483	113.147	91.8183	0.811496	-0.301344	0.283167	0.455527	NA	NA	0	0	0	0	0	0	0	0	0	0	1
I	4295138	4297332	2195	1	SPAC25G10.01	SPAC25G10.02	2675	2130	2243	3127	5.6608	5.62393	5.35984	5.31882	2503.38	2337.56	2669.19	1.14187	0.1914	0.0901143	0.181134	NA	NA	0	0	0	0	0	0	0	0	0	0	1
I	4299757	4301402	1646	1	SPAC25G10.03	SPAC25G10.04c	4179	3264	4245	6175	6.77598	6.71128	6.75173	6.77204	4324.22	4518.61	4129.83	0.913961	-0.129796	0.230929	0.389655	NA	NA	0	0	0	0	0	0	0	0	0	0	1
I	4305949	4306399	451	1	SPAC25G10.06	NULL	4784	3841	4956	8071	9.36108	9.33616	9.36518	9.54839	5193.21	5592.83	4793.59	0.857097	-0.222469	0.0270441	0.0643995	NA	NA	0	0	0	0	0	0	0	0	0	0	1
I	4310535	4313061	2527	1	SPAC25G10.08	NULL	33934	26356	50597	73311	9.12272	9.04993	9.65218	9.6668	43596.3	53751.3	33441.3	0.622149	-0.684669	2.80208e-11	2.52714e-10	NA	NA	0	0	0	0	0	0	0	0	0	0	1
I	4323522	4325624	2103	1	SPNCRNA.977	SPAC27F1.05c	214	204	451	563	2.07872	2.30149	3.10738	2.90703	340.262	445.798	234.726	0.526531	-0.925411	1.31531e-07	8.06772e-07	NA	NA	0	0	0	0	0	0	0	0	0	0	1
I	4326026	4326614	589	1	SPNCRNA.978	SPAC27F1.10	1995	1849	63	76	7.13553	7.3177	2.10379	1.85407	1108.12	61.299	2154.93	35.1545	5.13564	4.91845e-70	1.66783e-68	NA	NA	0	0	0	0	0	0	0	0	0	0	1
I	4328945	4330716	1772	1	SPAC27F1.07	NULL	8443	6862	9042	11877	7.62786	7.62055	7.67989	7.55299	8833.64	9154.84	8512.43	0.929829	-0.104962	0.351192	0.534445	NA	NA	0	0	0	0	0	0	0	0	0	0	1
I	4330993	4333166	2174	1	SPAC27F1.08	SPAC27F1.09c	1415	1145	1874	2878	4.75594	4.74229	5.1144	5.21298	1737.11	2050.76	1423.46	0.694113	-0.526757	6.93403e-06	3.32545e-05	NA	NA	0	0	0	0	0	0	0	0	0	0	1
I	4337097	4338471	1375	1	SPAC23D3.01	NULL	723	577	1092	1426	4.44812	4.41451	4.99617	4.86081	912.396	1102.54	722.252	0.65508	-0.610257	6.74369e-06	3.24064e-05	NA	NA	0	0	0	0	0	0	0	0	0	0	1
I	4338673	4339944	1272	1	SPAC23D3.02	NULL	875	697	1101	1621	4.89596	4.85965	5.18056	5.21827	1026.2	1179.12	873.271	0.740613	-0.433208	0.000774957	0.00262859	NA	NA	0	0	0	0	0	0	0	0	0	0	1
I	4343822	4346458	2637	1	SPNCRNA.979	c("SPAC23D3.04c", "SPAC23D3.05c", "SPAC23D3.06c")	547	434	539	739	3.1062	3.06417	3.03809	2.97302	550.988	557.145	544.831	0.977898	-0.0322436	0.85878	0.963259	NA	NA	0	0	0	0	0	0	0	0	0	0	1
I	4350803	4352369	1567	1	SPAC23D3.07	c("SPAC23D3.06c", "SPAC23D3.09")	6834	5484	7099	8835	7.60819	7.5825	7.61622	7.41147	6926.53	7007.19	6845.87	0.976978	-0.0336024	0.855978	0.9617	NA	NA	0	0	0	0	0	0	0	0	0	0	1
I	4352440	4355260	2821	1	SPAC23D3.08	SPAC23D3.09	813	593	1094	1360	3.60641	3.443	3.98784	3.78147	928.12	1079.29	776.95	0.719873	-0.474186	0.000685121	0.00235448	NA	NA	0	0	0	0	0	0	0	0	0	0	1
I	4357920	4360891	2972	1	SPAC23D3.11	c("SPAC23D3.10c", "SPNCRNA.980")	598	517	481	835	3.06227	3.1441	2.70131	2.97668	592.148	561.84	622.456	1.10789	0.147813	0.443014	0.628867	NA	NA	0	0	0	0	0	0	0	0	0	0	1
I	4360504	4362103	1600	1	SPNCRNA.244	SPNCRNA.980	9	4	6	11	-2.09838	-2.97644	-2.73017	-2.37608	7.10353	7.22356	6.9835	0.966767	-0.0487604	1	1	NA	NA	0	0	0	0	0	0	0	0	0	0	1
I	4362493	4365125	2633	1	SPAC23D3.12	NULL	2978	2737	4129	6120	5.55312	5.72319	5.97771	6.02509	3819.61	4437.02	3202.19	0.721699	-0.470531	9.07302e-06	4.26606e-05	NA	NA	0	0	0	0	0	0	0	0	0	0	1
I	4365547	4366456	910	1	SPAC23D3.16	SPAC23D3.17	305	243	324	455	4.19352	4.15748	4.23385	4.20336	321.651	338.877	304.426	0.898339	-0.154669	0.38966	0.575919	NA	NA	0	0	0	0	0	0	0	0	0	0	1
I	4366465	4367503	1039	1	SPNCRNA.981	SPAC23D3.17	51	64	40	40	1.02694	1.64632	0.629586	0.109228	50.7606	35.88	65.6413	1.82947	0.871425	0.075918	0.156504	NA	NA	0	0	0	0	0	0	0	0	0	0	1
I	4374389	4375304	916	1	SPNCRNA.982	SPAC23D3.14c	135	79	116	200	2.6131	2.13188	2.34741	2.61292	125.863	134.99	116.735	0.864769	-0.209613	0.430195	0.617769	NA	NA	0	0	0	0	0	0	0	0	0	0	1
I	4375301	4382775	7475	1	SPAC1527.01	NULL	1913	1223	3592	5131	3.40925	3.05565	4.27134	4.26543	2754.17	3788.86	1719.49	0.453827	-1.13979	1.32132e-22	2.21216e-21	NA	NA	0	0	0	0	0	0	0	0	0	0	1
I	4383079	4384239	1161	1	SPAC1527.02	NULL	560	425	709	1049	4.60995	4.5038	4.90345	4.94825	653.399	761.199	545.599	0.716762	-0.480434	0.000836367	0.00281857	NA	NA	0	0	0	0	0	0	0	0	0	0	1
I	4384450	4386950	2501	1	SPAC1527.03	SPAC30.01c	2271	1824	2190	3184	5.23631	5.2119	5.13705	5.1566	2303.25	2330.53	2275.96	0.976586	-0.0341816	0.744635	0.884047	NA	NA	0	0	0	0	0	0	0	0	0	0	1
I	4395187	4395595	409	1	SPNCRNA.983	SPAC30.03c	25	23	7	26	1.34339	1.51491	-0.539952	0.832757	20.0868	13.277	26.8967	2.02582	1.01851	0.142916	0.265138	NA	NA	0	0	0	0	0	0	0	0	0	0	1
I	4400686	4401605	920	1	SPNCRNA.246	SPNCRNA.984	56	48	50	60	1.33736	1.40678	1.127	0.869674	53.2809	48.5331	58.0286	1.19565	0.257795	0.483912	0.670819	NA	NA	0	0	0	0	0	0	0	0	0	0	1
I	4400708	4401528	821	1	SPNCRNA.985	SPNCRNA.984	52	42	50	58	1.39469	1.37838	1.29125	0.985016	50.0292	47.7965	52.262	1.09343	0.128857	0.717205	0.863156	NA	NA	0	0	0	0	0	0	0	0	0	0	1
I	4401733	4403868	2136	1	SPAC29E6.01	SPNCRNA.984	1667	1259	1588	2234	5.10554	4.99238	4.98864	4.9607	1641.31	1662.37	1620.26	0.974673	-0.0370105	0.799371	0.924169	NA	NA	0	0	0	0	0	0	0	0	0	0	1
I	4403839	4409596	5758	1	SPAC29E6.02	SPAC29E6.03c	3425	2649	4881	6407	4.68248	4.60364	5.1467	5.01881	4154.27	4940.3	3368.25	0.68179	-0.552601	7.90248e-07	4.34745e-06	NA	NA	0	0	0	0	0	0	0	0	0	0	1
I	4409773	4410391	619	1	SPAC29E6.04	SPAC29E6.05c	597	384	804	1126	5.32561	4.9808	5.70822	5.67379	688.932	839.784	538.08	0.640735	-0.642199	1.27737e-05	5.8749e-05	NA	NA	0	0	0	0	0	0	0	0	0	0	1
I	4414824	4415174	351	1	SPAC29E6.07	NULL	11	15	10	7	0.3796	1.11887	0.195242	-0.83968	11.3887	7.86505	14.9123	1.89602	0.922972	0.26213	0.430277	NA	NA	0	0	0	0	0	0	0	0	0	0	1
I	4415474	4417151	1678	1	SPAC29E6.08	NULL	3631	2432	1962	3061	6.85623	6.56982	5.92133	6.04265	2749.09	2164.69	3333.49	1.53994	0.622874	3.0302e-05	0.000130796	NA	NA	0	0	0	0	0	0	0	0	0	0	1
I	4417364	4418680	1317	1	SPAC29E6.09	NULL	399	321	448	658	3.65269	3.63069	3.77295	3.80717	439.706	479.202	400.21	0.835159	-0.259877	0.0989369	0.195966	NA	NA	0	0	0	0	0	0	0	0	0	0	1
I	4422700	4424646	1947	1	SPAC16.01	NULL	792	626	914	1180	4.57963	4.5321	4.73946	4.58762	852.592	917.829	787.354	0.857845	-0.221212	0.120781	0.230905	NA	NA	0	0	0	0	0	0	0	0	0	0	1
I	4424582	4427095	2514	1	SPNCRNA.986	SPAC16.02c	145	104	48	87	1.25963	1.07198	-0.382159	-0.0445446	97.4395	57.4202	137.459	2.39391	1.25937	1.52204e-05	6.92328e-05	NA	NA	0	0	0	0	0	0	0	0	0	0	1
I	4429023	4429505	483	1	SPNCRNA.247	NULL	1	3	5	0	-3.54023	-1.66357	-1.26529	-16.6096	2.51556	2.64343	2.38768	0.903252	-0.146799	1	1	NA	NA	0	0	0	0	0	0	0	0	0	0	1
I	4429631	4431741	2111	1	SPAC16.04	NULL	1707	1343	2966	4388	5.1022	5.04801	5.8524	5.89709	2438.65	3184.24	1693.06	0.531701	-0.911313	2.24296e-15	2.79011e-14	NA	NA	0	0	0	0	0	0	0	0	0	0	1
I	4434861	4435509	649	1	SPAC9E9.01	SPAC9E9.02	30	15	17	27	1.03445	0.326273	0.168177	0.315238	21.6308	18.9321	24.3295	1.28509	0.361869	0.523846	0.705751	NA	NA	0	0	0	0	0	0	0	0	0	0	1
I	4437466	4438921	1456	1	SPNCRNA.987	SPAC9E9.17c	59	61	24	13	0.750342	1.09025	-0.594182	-1.99903	42.5955	17.4765	67.7144	3.87459	1.95404	5.96471e-06	2.89294e-05	NA	NA	0	0	0	0	0	0	0	0	0	0	1
I	4439118	4439451	334	1	SPNCRNA.12	NULL	0	2	0	0	-16.6096	-1.71636	-16.6096	-16.6096	0.63068	0	1.26136	Inf	Inf	0.67744	0.841038	NA	NA	0	0	0	0	0	0	0	0	0	0	1
I	4439837	4442513	2677	1	SPAC9E9.03	NULL	20449	16813	23996	33237	8.30883	8.31819	8.49273	8.44237	22833.5	24928	20739	0.831957	-0.265419	0.00998056	0.026659	NA	NA	0	0	0	0	0	0	0	0	0	0	1
I	4442980	4444196	1217	1	SPAC9E9.04	NULL	3160	2468	2682	4270	7.13701	7.07224	6.85354	7.0041	3056.69	2990.63	3122.75	1.04418	0.0623648	0.647938	0.81591	NA	NA	0	0	0	0	0	0	0	0	0	0	1
I	4444387	4446593	2207	1	SPAC9E9.05	SPAC9E9.06c	319	313	313	478	2.58503	2.84945	2.51078	2.60126	348.523	341.533	355.513	1.04093	0.0578785	0.872965	0.972897	NA	NA	0	0	0	0	0	0	0	0	0	0	1
I	4450589	4453369	2781	1	SPAC9E9.08	SPAC9E9.09c	1062	789	983	1340	4.08876	3.95189	3.93038	3.85699	1018.61	1013.24	1023.98	1.0106	0.0152123	0.842215	0.953056	NA	NA	0	0	0	0	0	0	0	0	0	0	1
I	4455878	4458045	2168	1	SPNCRNA.989	NULL	35	26	49	79	-0.57736	-0.714387	-0.138795	0.0299118	44.3738	55.0024	33.7452	0.613522	-0.704813	0.0850605	0.172565	NA	NA	0	0	0	0	0	0	0	0	0	0	1
I	4458176	4461222	3047	1	SPNCRNA.990	SPAC9E9.10c	375	285	107	122	2.35306	2.24895	0.496932	0.165842	233.557	101.504	365.61	3.60194	1.84877	8.71399e-20	1.33592e-18	NA	NA	0	0	0	0	0	0	0	0	0	0	1
I	4461697	4462901	1205	1	SPAC9E9.11	NULL	13137	10181	9935	15574	8.82202	8.74607	8.37212	8.5003	11960.4	10988.6	12932.2	1.17687	0.23496	0.0302775	0.0709867	NA	NA	0	0	0	0	0	0	0	0	0	0	1
I	4469175	4470627	1453	1	SPAC9E9.14	NULL	1485	1229	2127	3121	5.40691	5.42575	5.87841	5.91124	1892.58	2274.02	1511.13	0.664521	-0.589613	4.41835e-07	2.51364e-06	NA	NA	0	0	0	0	0	0	0	0	0	0	1
I	4470561	4471415	855	1	SPAC9E9.15	NULL	1083	942	1145	1736	5.71652	5.8071	5.74998	5.83004	1187.81	1244.74	1130.88	0.90853	-0.138394	0.222891	0.379193	NA	NA	0	0	0	0	0	0	0	0	0	0	1
I	4471656	4472041	386	1	SPNCRNA.311	NULL	3	9	7	6	-1.63197	0.244779	-0.456454	-1.1992	6.53687	5.91068	7.16305	1.21188	0.277249	0.918207	0.999199	NA	NA	0	0	0	0	0	0	0	0	0	0	1
I	4472472	4474744	2273	1	SPAC17C9.16c	SPNCRNA.991	618	475	977	1521	3.5306	3.44274	4.1445	4.26273	841.305	1076.73	605.88	0.562703	-0.829554	8.68437e-10	6.88554e-09	NA	NA	0	0	0	0	0	0	0	0	0	0	1
I	4475148	4476658	1511	1	SPAC17C9.15c	SPAC17C9.14	1386	1125	1547	2070	5.25091	5.24172	5.3626	5.26239	1488.38	1580.29	1396.48	0.883685	-0.178395	0.154737	0.282934	NA	NA	0	0	0	0	0	0	0	0	0	0	1
I	4477472	4479000	1529	1	SPAC17C9.13c	SPAC17C9.12	3832	2727	5187	7574	6.70099	6.50202	7.09094	7.11673	4575.53	5531.9	3619.17	0.654236	-0.612118	2.90105e-08	1.93575e-07	NA	NA	0	0	0	0	0	0	0	0	0	0	1
I	4480191	4481986	1796	1	SPAC17C9.11c	SPAC17C9.10	1661	1373	1090	1502	5.52932	5.54642	4.87474	4.81694	1409.33	1129.47	1689.19	1.49555	0.580676	2.42964e-06	1.24959e-05	NA	NA	0	0	0	0	0	0	0	0	0	0	1
I	4483738	4484657	920	1	SPAC17C9.09c	SPAC17C9.10	1379	1027	1159	1461	6.12717	5.9938	5.82957	5.64329	1241.03	1150.85	1331.2	1.15671	0.210023	0.0665875	0.140055	NA	NA	0	0	0	0	0	0	0	0	0	0	1
I	4490444	4491942	1499	1	SPAC17C9.05c	SPAC17C9.06	114	105	126	158	1.92993	2.1031	2.02746	1.8336	123.766	124.808	122.725	0.983308	-0.0242849	0.944317	1	NA	NA	0	0	0	0	0	0	0	0	0	0	1
I	4496733	4498140	1408	1	SPAC17C9.02c	NULL	667	450	1035	1560	4.34234	4.0664	4.92936	5.00091	868.079	1121.76	614.399	0.547711	-0.868514	2.25611e-10	1.89255e-09	NA	NA	0	0	0	0	0	0	0	0	0	0	1
I	4498074	4500581	2508	1	SPAC17C9.01c	NULL	1468	1118	1412	1995	4.69239	4.59127	4.58942	4.5677	1457	1481.29	1432.7	0.9672	-0.0481141	0.72557	0.868456	NA	NA	0	0	0	0	0	0	0	0	0	0	1
I	4500526	4501673	1148	1	SPAC1851.02	NULL	3203	2928	4305	5844	6.93721	7.09952	7.31695	7.23753	3931.3	4428.42	3434.17	0.775486	-0.366828	0.000638992	0.00221178	NA	NA	0	0	0	0	0	0	0	0	0	0	1
I	4502333	4505734	3402	1	SPAC1851.03	SPAC1851.04c	1730	1276	2007	2963	4.55414	4.40681	4.72155	4.76321	1907.3	2152.39	1662.21	0.772264	-0.372835	0.001688	0.0053591	NA	NA	0	0	0	0	0	0	0	0	0	0	1
I	4505708	4510013	4306	1	SPNCRNA.992	c("SPAC1851.04c", "SPAC27D7.02c")	278	234	157	228	1.4223	1.46554	0.551127	0.569033	226.173	166.979	285.368	1.709	0.773154	0.000140767	0.000548163	NA	NA	0	0	0	0	0	0	0	0	0	0	1
I	4515182	4515993	812	1	SPNCRNA.993	NULL	6	8	5	14	-1.70484	-0.998009	-2.01472	-1.04969	7.90956	7.79982	8.0193	1.02814	0.0400348	1	1	NA	NA	0	0	0	0	0	0	0	0	0	0	1
I	4516018	4517065	1048	1	SPNCRNA.994	NULL	28	26	57	70	0.14943	0.334327	1.1281	0.904134	43.0964	55.917	30.2757	0.541439	-0.885129	0.036392	0.0831022	NA	NA	0	0	0	0	0	0	0	0	0	0	1
I	4516070	4517070	1001	1	SPNCRNA.130	NULL	21	18	36	48	-0.199408	-0.129987	0.531337	0.426013	29.2362	36.7117	21.7607	0.592746	-0.754514	0.14128	0.262609	NA	NA	0	0	0	0	0	0	0	0	0	0	1
I	4517412	4518818	1407	1	SPAC27D7.04	SPAC27D7.05c	628	554	826	1060	4.2117	4.32263	4.56022	4.39971	743.883	827.107	660.66	0.79876	-0.324165	0.0206826	0.0509699	NA	NA	0	0	0	0	0	0	0	0	0	0	1
I	4519000	4520130	1131	1	SPAC27D7.06	NULL	3122	2564	3528	5058	6.84036	6.8481	6.96988	6.96923	3446.3	3728.13	3164.46	0.848805	-0.236495	0.0300076	0.0705174	NA	NA	0	0	0	0	0	0	0	0	0	0	1
I	4531070	4531631	562	1	SPNCRNA.248	SPNCRNA.995	9	4	11	10	-0.588995	-1.46709	-0.346348	-1.0042	8.24109	9.49868	6.9835	0.735208	-0.443776	0.785821	0.915292	NA	NA	0	0	0	0	0	0	0	0	0	0	1
I	4531144	4532754	1611	1	SPNCRNA.996	SPNCRNA.995	33	23	34	56	-0.233845	-0.46286	-0.237632	-0.038105	34.7314	38.6009	30.8618	0.799511	-0.32281	0.495527	0.68152	NA	NA	0	0	0	0	0	0	0	0	0	0	1
I	4532857	4532927	71	1	SPATRNAASP.01	NULL	3	0	1	6	0.810708	-16.6096	-0.821093	1.24349	2.11275	2.73857	1.48693	0.542958	-0.881088	0.787651	0.916356	NA	NA	0	0	0	0	0	0	0	0	0	0	1
I	4542091	4543533	1443	1	SPAC637.03	NULL	562	464	112	209	4.01506	4.03042	1.64113	2.02077	353.688	136.19	571.187	4.19403	2.06834	1.4682e-29	2.93737e-28	NA	NA	0	0	0	0	0	0	0	0	0	0	1
I	4543486	4546946	3461	1	SPAC637.04	c("SPNCRNA.997", "SPAC637.05c")	1816	1354	1814	2630	4.48521	4.35349	4.43677	4.45229	1840.86	1927.7	1754.03	0.909906	-0.13621	0.263809	0.432323	NA	NA	0	0	0	0	0	0	0	0	0	0	1
I	4549809	4551242	1434	1	SPAC637.06	NULL	3448	3094	4008	5896	6.6412	6.77673	6.81147	6.84796	3975.42	4290.55	3660.3	0.853107	-0.229201	0.0256869	0.0616444	NA	NA	0	0	0	0	0	0	0	0	0	0	1
I	4551740	4553741	2002	1	SPAC637.07	NULL	12831	10343	17837	24686	8.0556	8.03644	8.48399	8.43245	15702.5	18522.4	12882.7	0.695522	-0.523831	5.11336e-07	2.88308e-06	NA	NA	0	0	0	0	0	0	0	0	0	0	1
I	4553894	4555164	1271	1	SPAC637.08	c("SPNCRNA.998", "SPNCRNA.563")	1539	1165	3070	3935	5.65151	5.54166	6.6009	6.43867	2284.96	3072.38	1497.54	0.487419	-1.03677	1.9036e-18	2.74649e-17	NA	NA	0	0	0	0	0	0	0	0	0	0	1
I	4555184	4557390	2207	1	SPAC637.09	SPNCRNA.998	1928	1554	3358	4147	5.1805	5.1612	5.93414	5.71825	2619.2	3302.72	1935.68	0.586085	-0.770819	7.50251e-08	4.75502e-07	NA	NA	0	0	0	0	0	0	0	0	0	0	1
I	4557438	4558364	927	1	SPNCRNA.999	c("SPNCRNA.998", "SPAC637.10c")	25	29	24	26	0.162928	0.668863	0.0571795	-0.347701	26.4727	22.2646	30.6808	1.37801	0.462583	0.40174	0.589474	NA	NA	0	0	0	0	0	0	0	0	0	0	1
I	4558823	4561448	2626	1	SPAC637.11	SPAC637.12c	1288	1005	1648	2250	4.34775	4.28163	4.65648	4.58532	1486.1	1699.98	1272.22	0.748374	-0.418168	0.000737274	0.00251428	NA	NA	0	0	0	0	0	0	0	0	0	0	1
I	4565700	4566208	509	1	SPNCRNA.249	NULL	34	34	32	53	1.47143	1.76324	1.33711	1.54467	37.3668	36.4386	38.295	1.05095	0.0716886	0.976268	1	NA	NA	0	0	0	0	0	0	0	0	0	0	1
I	4566342	4571134	4793	1	SPAC31F12.01	SPAC12B10.01c	2648	1679	2901	4428	4.51946	4.15397	4.60425	4.69399	2767.99	3164.61	2371.37	0.749341	-0.416305	0.00531591	0.0151429	NA	NA	0	0	0	0	0	0	0	0	0	0	1
I	4578164	4580722	2559	1	SPAC12B10.03	SPNCRNA.1001	746	520	1143	1528	3.59715	3.3683	4.16587	4.06433	932.387	1167.07	697.703	0.597824	-0.742208	5.65894e-08	3.65018e-07	NA	NA	0	0	0	0	0	0	0	0	0	0	1
I	4580656	4582281	1626	1	SPAC12B10.04	SPNCRNA.1001	1196	873	1794	2647	5.03343	4.87108	5.57154	5.61235	1533.38	1923.39	1143.37	0.594457	-0.750355	9.38879e-10	7.41467e-09	NA	NA	0	0	0	0	0	0	0	0	0	0	1
I	4582299	4584511	2213	1	SPAC12B10.05	SPAC12B10.06c	1624	1349	2167	3027	5.29431	5.31846	5.6636	5.62542	1958.13	2260.55	1655.71	0.732438	-0.449222	0.000122051	0.000481148	NA	NA	0	0	0	0	0	0	0	0	0	0	1
I	4584465	4586536	2072	1	SPAC12B10.07	c("SPAC12B10.06c", "SPAC12B10.08c")	2385	1841	1870	2922	5.65715	5.57546	5.25934	5.3829	2204.02	2064.85	2343.19	1.1348	0.182433	0.131496	0.247565	NA	NA	0	0	0	0	0	0	0	0	0	0	1
I	4588250	4589793	1544	1	SPAC12B10.09	SPAC12B10.08c	323	277	338	576	3.41511	3.48527	3.43374	3.68242	362.818	390.844	334.791	0.856583	-0.223334	0.140634	0.261769	NA	NA	0	0	0	0	0	0	0	0	0	0	1
I	4590152	4591524	1373	1	SPAC12B10.10	NULL	368	243	492	681	3.47593	3.169	3.84803	3.79666	423.293	510.935	335.652	0.656936	-0.606175	0.000312201	0.00114748	NA	NA	0	0	0	0	0	0	0	0	0	0	1
I	4591855	4593567	1713	1	SPAC12B10.11	SPNCRNA.1002	202	147	448	724	2.29139	2.12466	3.39368	3.5658	348.17	503.51	192.83	0.382971	-1.38469	4.03968e-15	4.96339e-14	NA	NA	0	0	0	0	0	0	0	0	0	0	1
I	4596234	4597380	1147	1	SPAC12B10.13	NULL	609	448	550	811	4.6048	4.45367	4.41094	4.45084	586.935	589.479	584.391	0.991368	-0.012508	0.956257	1	NA	NA	0	0	0	0	0	0	0	0	0	0	1
I	4599993	4600855	863	1	SPNCRNA.1003	SPAC12B10.15c	194	168	110	137	3.22218	3.3064	2.35677	2.15308	155.362	108.614	202.109	1.86079	0.895917	0.000109634	0.000435778	NA	NA	0	0	0	0	0	0	0	0	0	0	1
I	4604711	4606362	1652	1	SPNCRNA.1004	SPAC1093.07	236	174	150	246	2.56813	2.42025	1.86745	2.06079	198.309	169.908	226.71	1.33431	0.416094	0.0536556	0.117085	NA	NA	0	0	0	0	0	0	0	0	0	0	1
I	4606299	4611737	5439	1	SPAC1093.01	SPAC1093.07	2586	1657	3133	5225	4.30287	3.95253	4.53283	4.75036	2953.79	3580.81	2326.77	0.649788	-0.621959	0.000534293	0.00187534	NA	NA	0	0	0	0	0	0	0	0	0	0	1
I	4612099	4613297	1199	1	SPAC1093.02	NULL	6467	5062	8666	12190	7.80675	7.74517	8.18216	8.15406	7734.58	9071.33	6397.82	0.705279	-0.503734	2.31001e-06	1.19317e-05	NA	NA	0	0	0	0	0	0	0	0	0	0	1
I	4613443	4617157	3715	1	SPAC1093.03	SPAC1093.04c	1441	994	1863	2604	4.0915	3.84756	4.4152	4.37794	1642.57	1944.03	1341.12	0.689864	-0.535616	1.53664e-05	6.97791e-05	NA	NA	0	0	0	0	0	0	0	0	0	0	1
I	4619603	4622351	2749	1	SPAC1093.05	c("SPNCRNA.1005", "SPAC1093.06c")	2923	2576	6098	7845	5.46403	5.57352	6.47806	6.32113	4593.37	6113.35	3073.39	0.502735	-0.992129	4.88102e-16	6.28668e-15	NA	NA	0	0	0	0	0	0	0	0	0	0	1
I	4625840	4627501	1662	1	SPNCRNA.1006	SPAC1093.06c	49	44	42	64	0.291502	0.428036	0.0222556	0.109575	48.9066	45.7769	52.0364	1.13674	0.184902	0.693435	0.852868	NA	NA	0	0	0	0	0	0	0	0	0	0	1
I	4635485	4636898	1414	1	SPAC30C2.02	NULL	1879	1501	3593	5379	5.78567	5.75344	6.67404	6.73582	2879.34	3880.73	1877.96	0.48392	-1.04716	2.20468e-20	3.464e-19	NA	NA	0	0	0	0	0	0	0	0	0	0	1
I	4637119	4637943	825	1	SPAC30C2.03	SPNCRNA.1007	188	136	185	263	3.24182	3.06651	3.17176	3.15894	186.813	194.673	178.953	0.919249	-0.121473	0.611111	0.782983	NA	NA	0	0	0	0	0	0	0	0	0	0	1
I	4638117	4639647	1531	1	SPAC30C2.04	NULL	10278	8511	15310	22406	8.1225	8.14215	8.65056	8.6796	13404.3	16346.6	10461.9	0.640006	-0.643843	4.67497e-10	3.79948e-09	NA	NA	0	0	0	0	0	0	0	0	0	0	1
I	4639678	4640813	1136	1	SPAC30C2.05	SPAC30C2.06c	616	485	557	789	4.7414	4.68827	4.5493	4.53128	598.136	585.077	611.195	1.04464	0.0630065	0.665757	0.832199	NA	NA	0	0	0	0	0	0	0	0	0	0	1
I	4642290	4645177	2888	1	SPAC30C2.07	SPAC30C2.06c	2866	2086	3141	4535	5.36445	5.19797	5.44978	5.4593	3033.51	3330.9	2736.11	0.821432	-0.283788	0.0134182	0.0347364	NA	NA	0	0	0	0	0	0	0	0	0	0	1
I	4645460	4647689	2230	1	SPAC30C2.08	SPNCRNA.1008	10702	8109	10561	15812	7.80108	7.6926	7.73509	7.797	10912.9	11407.2	10418.5	0.913329	-0.130793	0.207527	0.357246	NA	NA	0	0	0	0	0	0	0	0	0	0	1
I	4648900	4650466	1567	1	SPAC1635.01	SPNCRNA.1008	11834	10411	9346	13123	8.36407	8.47105	7.9767	7.94601	11103	9774.48	12431.4	1.27183	0.346902	0.00124437	0.00405907	NA	NA	0	0	0	0	0	0	0	0	0	0	1
I	4650598	4651189	592	1	SPNCRNA.1009	SPAC144.01	4	2	2	9	-1.83392	-2.54207	-2.88072	-1.23123	3.80806	4.37219	3.24393	0.741945	-0.430615	0.814946	0.935227	NA	NA	0	0	0	0	0	0	0	0	0	0	1
I	4652937	4654387	1451	1	SPAC144.02	SPNCRNA.1010	817	611	976	1434	4.54685	4.4195	4.75653	4.79126	917.222	1044.16	790.285	0.756863	-0.401896	0.00264822	0.00805811	NA	NA	0	0	0	0	0	0	0	0	0	0	1
I	4654662	4656456	1795	1	SPAC144.03	SPNCRNA.1011	8663	7205	8885	13466	8.03302	8.05897	8.02267	8.10218	9247.44	9657.08	8837.8	0.915162	-0.1279	0.185023	0.325566	NA	NA	0	0	0	0	0	0	0	0	0	0	1
I	4658794	4663843	5050	1	SPAC144.05	NULL	2454	1838	3084	4327	4.39353	4.26834	4.67634	4.64454	2799.83	3224.16	2375.5	0.73678	-0.440694	0.000124594	0.000489887	NA	NA	0	0	0	0	0	0	0	0	0	0	1
I	4664299	4668408	4110	1	SPAC144.06	c("SPNCRNA.1012", "SPAC144.07c")	2418	1862	2646	3803	4.67294	4.58779	4.75608	4.75904	2586.19	2799.6	2372.79	0.847546	-0.238636	0.0373557	0.0850081	NA	NA	0	0	0	0	0	0	0	0	0	0	1
I	4668470	4671381	2912	1	SPAC144.08	c("SPAC144.07c", "SPAC144.09c")	1592	1126	1598	2298	4.52578	4.31796	4.48435	4.4881	1595.22	1691.22	1499.21	0.886463	-0.173867	0.174219	0.31085	NA	NA	0	0	0	0	0	0	0	0	0	0	1
I	4673137	4673690	554	1	SPNCRNA.1014	SPNCRNA.1013	89	81	102	136	2.73748	2.89341	2.88731	2.78199	99.6069	104.017	95.1973	0.915212	-0.127822	0.650165	0.81774	NA	NA	0	0	0	0	0	0	0	0	0	0	1
I	4674587	4675181	595	1	SPAC144.11	SPNCRNA.1015	9008	7333	10480	14587	9.29573	9.29074	9.46723	9.42392	10001.4	10913.2	9089.52	0.832891	-0.2638	0.011983	0.0313522	NA	NA	0	0	0	0	0	0	0	0	0	0	1
I	4675116	4678174	3059	1	SPAC144.12	c("SPNCRNA.1015", "SPAC144.13c")	1945	1001	1369	2137	4.7222	4.05568	4.16869	4.29079	1553.1	1510.86	1595.33	1.05591	0.0784923	0.73477	0.875552	NA	NA	0	0	0	0	0	0	0	0	0	0	1
I	4681264	4683244	1981	1	SPAC144.14	SPAC144.15c	626	498	749	1096	3.75187	3.71366	3.96381	3.99266	712.004	799.657	624.351	0.780773	-0.357025	0.0104574	0.0277783	NA	NA	0	0	0	0	0	0	0	0	0	0	1
I	4686462	4688886	2425	1	SPAC144.16	SPAC144.17c	1226	934	1242	1766	4.39146	4.29081	4.36331	4.35077	1251.89	1307.07	1196.71	0.915569	-0.127259	0.326458	0.50696	NA	NA	0	0	0	0	0	0	0	0	0	0	1
I	4689241	4691828	2588	1	SPAC144.18	c("SPNCRNA.1016", "SPNCRNA.1017")	1036	904	1593	2266	4.05467	4.14986	4.62854	4.61658	1380.21	1676.79	1083.62	0.646245	-0.629847	2.4708e-07	1.46034e-06	NA	NA	0	0	0	0	0	0	0	0	0	0	1
I	4691803	4693738	1936	1	SPAC1834.01	SPNCRNA.1017	3793	3264	6277	9859	6.34575	6.42086	7.02563	7.15663	5444.14	6949.76	3938.51	0.566712	-0.819314	1.02185e-14	1.21569e-13	NA	NA	0	0	0	0	0	0	0	0	0	0	1
I	4693681	4698606	4926	1	SPAC1834.02	NULL	21966	17223	27991	39910	7.53227	7.47315	7.8351	7.82653	25623.7	29497.8	21749.5	0.737325	-0.439628	2.10025e-05	9.31686e-05	NA	NA	0	0	0	0	0	0	0	0	0	0	1
I	4699691	4700560	870	1	SPAC1834.04	NULL	3305	2564	5025	7620	7.30105	7.22661	7.85867	7.93897	4359.18	5463.2	3255.16	0.595835	-0.747016	6.77433e-12	6.52117e-11	NA	NA	0	0	0	0	0	0	0	0	0	0	1
I	4702256	4704743	2488	1	SPAC1834.05	SPAC1834.06c	1404	988	1829	2970	4.55004	4.3349	4.8847	5.06374	1689.93	2060.86	1318.99	0.640022	-0.643807	4.1828e-07	2.39097e-06	NA	NA	0	0	0	0	0	0	0	0	0	0	1
I	4706793	4709252	2460	1	SPAC1834.07	NULL	951	755	1137	1672	4.24573	4.20457	4.45658	4.49256	1082.23	1216.94	947.519	0.778611	-0.361026	0.00460364	0.0133194	NA	NA	0	0	0	0	0	0	0	0	0	0	1
I	4709727	4715261	5535	1	SPAC1834.08	NULL	4874	3459	7136	9845	5.21831	5.01537	5.72146	5.66538	5998.02	7398.75	4597.28	0.62136	-0.6865	3.89541e-10	3.18532e-09	NA	NA	0	0	0	0	0	0	0	0	0	0	1
I	4715431	4715502	72	1	SPATRNATHR.05	NULL	0	0	0	0	-16.6096	-16.6096	-16.6096	-16.6096	0	0	0	NA	NA	NA	NA	NA	NA	0	0	0	0	0	0	0	0	0	0	1
I	4715734	4716187	454	1	SPNCRNA.252	NULL	3	2	0	0	-1.86605	-2.15919	-16.6096	-16.6096	1.37414	0	2.74829	Inf	Inf	0.234215	0.394167	NA	NA	0	0	0	0	0	0	0	0	0	0	1
I	4716549	4717760	1212	1	SPAC1834.09	SPAC1834.10c	508	429	401	642	4.121	4.16896	3.73291	3.89152	485.404	448.46	522.348	1.16476	0.220031	0.198186	0.344536	NA	NA	0	0	0	0	0	0	0	0	0	0	1
I	4721254	4722882	1629	1	SPNCRNA.1018	c("SPAC1834.11c", "SPAC1834.13")	1237	1125	1190	1363	4.97834	5.13324	4.8756	4.55107	1226.89	1131.15	1322.62	1.16928	0.225617	0.216371	0.370199	NA	NA	0	0	0	0	0	0	0	0	0	0	1
I	4722806	4724645	1840	1	SPAC17D4.01	NULL	18992	15553	24009	31624	9.15396	9.15758	9.44529	9.32237	21781.5	24340.8	19222.2	0.789713	-0.340601	0.00117792	0.00386017	NA	NA	0	0	0	0	0	0	0	0	0	0	1
I	4724742	4726846	2105	1	SPAC17D4.02	SPAC17D4.03c	1473	1212	2553	3651	4.8888	4.89925	5.63538	5.63111	2094.46	2694.45	1494.47	0.554646	-0.85036	3.19487e-13	3.43034e-12	NA	NA	0	0	0	0	0	0	0	0	0	0	1
I	4729678	4732140	2463	1	SPAC17D4.04	SPAC458.02c	2214	1621	4032	5279	5.32995	5.17199	6.14793	6.01634	3097.84	4075.99	2119.68	0.520042	-0.9433	2.10813e-16	2.76871e-15	NA	NA	0	0	0	0	0	0	0	0	0	0	1
I	4733588	4734102	515	1	SPNCRNA.1019	SPAC458.02c	50	55	29	65	2.01092	2.44023	1.17819	1.82221	49.3709	39.2723	59.4695	1.51429	0.59864	0.199702	0.346669	NA	NA	0	0	0	0	0	0	0	0	0	0	1
I	4734087	4737598	3512	1	SPAC458.03	SPAC458.04c	1156	884	1230	1763	3.77233	3.67713	3.815	3.81401	1215.05	1299.62	1130.48	0.869857	-0.20115	0.115501	0.222655	NA	NA	0	0	0	0	0	0	0	0	0	0	1
I	4740188	4742814	2627	1	SPAC458.05	SPNCRNA.1020	1194	993	1026	1629	4.23787	4.26375	3.97224	4.11884	1180.24	1142.41	1218.06	1.06622	0.0925018	0.552731	0.734609	NA	NA	0	0	0	0	0	0	0	0	0	0	1
I	4742809	4744346	1538	1	SPAC458.06	SPNCRNA.1020	732	533	429	577	4.50964	4.34375	3.69192	3.59915	569.143	439.323	698.963	1.591	0.669933	4.32718e-06	2.14465e-05	NA	NA	0	0	0	0	0	0	0	0	0	0	1
I	4744528	4746206	1679	1	SPAC458.07	SPAPYUG7.02c	1108	1042	1156	1603	4.96959	5.1728	4.98392	4.93519	1203.95	1201.57	1206.34	1.00397	0.0057195	0.957423	1	NA	NA	0	0	0	0	0	0	0	0	0	0	1
I	4748524	4752562	4039	1	SPNCRNA.1021	c("SPAPYUG7.03c", "SPAPYUG7.04c")	145	123	125	211	0.575621	0.63004	0.314642	0.549593	146.621	143.8	149.442	1.03923	0.0555211	0.916577	0.998311	NA	NA	0	0	0	0	0	0	0	0	0	0	1
I	4752684	4753912	1229	1	SPAPYUG7.05	SPNCRNA.1022	3838	3658	5950	8410	7.01835	7.24087	7.60403	7.58289	5226.25	6243.2	4209.3	0.674222	-0.568704	3.59713e-07	2.07696e-06	NA	NA	0	0	0	0	0	0	0	0	0	0	1
I	4754130	4754926	797	1	SPAPYUG7.06	SPNCRNA.1022	153	126	215	331	2.99444	3.00614	3.43839	3.54052	195.439	235.579	155.299	0.659222	-0.601164	0.00397292	0.0116632	NA	NA	0	0	0	0	0	0	0	0	0	0	1
I	4754862	4760226	5365	1	SPAC1782.01	SPAC1782.02c	4344	2695	4622	6721	5.07093	4.67401	5.11357	5.13336	4385.89	4919.02	3852.75	0.783236	-0.352482	0.0298403	0.0702222	NA	NA	0	0	0	0	0	0	0	0	0	0	1
I	4761230	4763033	1804	1	SPAC1782.03	SPAC1782.02c	406	329	517	879	3.22384	3.21226	3.52567	3.771	502.901	597.078	408.725	0.684541	-0.546791	0.000230555	0.000861637	NA	NA	0	0	0	0	0	0	0	0	0	0	1
I	4763020	4764222	1203	1	SPAC1782.04	NULL	1048	909	1510	1964	5.22776	5.31428	5.70781	5.56669	1307.2	1521.68	1092.72	0.7181	-0.477743	0.000133804	0.000522677	NA	NA	0	0	0	0	0	0	0	0	0	0	1
I	4764357	4765742	1386	1	SPAC1782.05	SPAC1782.06c	395	329	428	735	3.56448	3.59253	3.63339	3.89316	450.13	496.988	403.272	0.811433	-0.301456	0.0398086	0.09001	NA	NA	0	0	0	0	0	0	0	0	0	0	1
I	4767042	4767986	945	1	SPAC1782.07	SPAC1782.08c	352	231	266	403	4.58699	4.27112	4.13598	4.21498	304.607	289.061	320.153	1.10756	0.147389	0.382843	0.570132	NA	NA	0	0	0	0	0	0	0	0	0	0	1
I	4767923	4769721	1799	1	SPNCRNA.1023	SPAC1782.08c	521	306	84	111	3.58765	3.11171	0.907974	0.789711	268.255	85.2924	451.218	5.29024	2.40333	1.60603e-10	1.35862e-09	NA	NA	0	0	0	0	0	0	0	0	0	0	1
I	4773628	4774653	1026	1	SPAC1782.11	SPAC1782.12c	3695	2744	5306	7933	7.38135	7.24387	7.85655	7.91643	4644.51	5727.04	3561.98	0.621959	-0.685108	3.45321e-10	2.847e-09	NA	NA	0	0	0	0	0	0	0	0	0	0	1
I	4775688	4777440	1753	1	SPAC11H11.01	SPAC11H11.02c	511	346	525	756	3.62951	3.35878	3.62165	3.62736	513.747	556.005	471.489	0.847993	-0.237875	0.14373	0.266462	NA	NA	0	0	0	0	0	0	0	0	0	0	1
I	4780224	4781922	1699	1	SPAC11H11.04	SPAC11H11.03c	287	237	54	73	2.80992	2.82557	0.353057	0.267632	173.578	55.4359	291.721	5.2623	2.39569	1.06881e-23	1.85404e-22	NA	NA	0	0	0	0	0	0	0	0	0	0	1
I	4783007	4784765	1759	1	SPAC11H11.06	NULL	4319	3941	4780	6844	6.71303	6.87271	6.81249	6.80995	4837.02	5047.86	4626.19	0.916466	-0.125846	0.196051	0.341766	NA	NA	0	0	0	0	0	0	0	0	0	0	1
I	4789418	4791232	1815	1	SPAC22F8.04	NULL	906	752	1742	2523	4.3731	4.39613	5.2694	5.28344	1386.77	1850.23	923.323	0.499033	-1.00279	5.73138e-16	7.35823e-15	NA	NA	0	0	0	0	0	0	0	0	0	0	1
I	4791261	4791958	698	1	SPNCRNA.1024	NULL	40	28	14	49	1.25034	1.02758	-0.311082	0.9759	31.4668	25.449	37.4847	1.47294	0.558696	0.371928	0.558776	NA	NA	0	0	0	0	0	0	0	0	0	0	1
I	4791892	4795263	3372	1	SPAC22F8.05	NULL	2186	1705	1082	2328	4.75017	4.68347	3.68873	4.27375	1794.13	1429.47	2158.78	1.5102	0.594736	0.0193276	0.0480748	NA	NA	0	0	0	0	0	0	0	0	0	0	1
I	4795276	4796348	1073	1	SPAC22F8.06	NULL	3024	2546	2309	3444	6.87029	6.91388	6.43425	6.4907	2796.87	2489.21	3104.53	1.2472	0.31869	0.00646376	0.0180235	NA	NA	0	0	0	0	0	0	0	0	0	0	1
I	4796977	4797059	83	1	SPATRNAALA.06	NULL	258	270	102	240	7.01167	7.36907	5.62601	6.34012	220.24	142.321	298.159	2.09497	1.06693	0.00810213	0.022079	NA	NA	0	0	0	0	0	0	0	0	0	0	1
I	4799541	4802652	3112	1	SPAC22F8.08	NULL	4686	2812	4584	6544	5.966	5.52105	5.88739	5.8806	4464.9	4833.74	4096.05	0.847388	-0.238906	0.240571	0.401754	NA	NA	0	0	0	0	0	0	0	0	0	0	1
I	4803032	4804584	1553	1	SPAC22F8.09	SPAC22F8.10c	1770	1585	3594	4262	5.6162	5.74874	6.59118	6.31676	2673.38	3469.85	1876.91	0.540921	-0.88651	6.92711e-06	3.32346e-05	NA	NA	0	0	0	0	0	0	0	0	0	0	1
I	4807494	4811555	4062	1	SPAC22F8.11	c("SPNCRNA.1025", "SPAC22F8.12c")	2372	1687	2898	3964	4.5994	4.39957	4.8415	4.77303	2615.87	2992.13	2239.62	0.748505	-0.417917	0.000393671	0.00141613	NA	NA	0	0	0	0	0	0	0	0	0	0	1
I	4811984	4813179	1196	1	SPAC20G4.01	SPAC20G4.02c	1118	1067	1604	2388	5.4361	5.66055	5.91	5.96376	1477.3	1727.54	1227.06	0.710294	-0.493513	2.60166e-05	0.000113565	NA	NA	0	0	0	0	0	0	0	0	0	0	1
I	4814239	4817443	3205	1	SPNCRNA.1026	SPAC20G4.02c	293	273	199	357	1.92414	2.11395	1.31915	1.64194	277.048	236.696	317.399	1.34095	0.423259	0.0575769	0.124085	NA	NA	0	0	0	0	0	0	0	0	0	0	1
I	4820804	4821352	549	1	SPNCRNA.54	SPAC20G4.04c	92	73	62	69	2.79839	2.75646	2.18217	1.81613	74.9154	58.1921	91.6387	1.57476	0.655133	0.0326562	0.0756475	NA	NA	0	0	0	0	0	0	0	0	0	0	1
I	4821574	4824734	3161	1	SPNCRNA.1027	c("SPAC20G4.04c", "SPAC20G4.05c")	365	303	277	362	2.26107	2.28431	1.81621	1.68195	325.89	279.775	372.006	1.32966	0.411055	0.017954	0.0450501	NA	NA	0	0	0	0	0	0	0	0	0	0	1
I	4826230	4826349	120	1	SPAC20G4.09	NULL	5	2	0	2	1.4686	0.43849	-16.6096	-0.420533	2.2381	0.736627	3.73957	5.07661	2.34387	0.358419	0.543035	NA	NA	0	0	0	0	0	0	0	0	0	0	1
I	4828891	4832473	3583	1	SPAC20G4.08	NULL	3688	2620	4684	6704	5.45097	5.24951	5.74902	5.74593	4212.92	4945.54	3480.31	0.703727	-0.506911	5.59343e-06	2.72609e-05	NA	NA	0	0	0	0	0	0	0	0	0	0	1
I	4832879	4834570	1692	1	SPAC4F10.02	NULL	1251	994	1176	1657	5.02411	4.98416	4.88806	4.86238	1239.49	1232.03	1246.94	1.01211	0.0173599	0.886787	0.982372	NA	NA	0	0	0	0	0	0	0	0	0	0	1
I	4836136	4837590	1455	1	SPAC4F10.04	NULL	805	600	814	1384	4.56481	4.43259	4.53399	4.77937	858.748	940.096	777.4	0.826937	-0.274151	0.0405693	0.0914885	NA	NA	0	0	0	0	0	0	0	0	0	0	1
I	4837762	4838650	889	1	SPNCRNA.1028	SPAC4F10.05c	60	63	66	90	1.48634	1.84854	1.57699	1.50408	68.7564	68.0415	69.4714	1.02102	0.0300044	1	1	NA	NA	0	0	0	0	0	0	0	0	0	0	1
I	4838959	4840514	1556	1	SPAC4F10.06	SPAC4F10.07c	1679	1285	3401	4341	5.48525	5.39123	6.45675	6.28845	2519.76	3396.91	1642.61	0.483559	-1.04824	2.48462e-18	3.56763e-17	NA	NA	0	0	0	0	0	0	0	0	0	0	1
I	4843779	4846395	2617	1	SPAC4F10.08	SPNCRNA.1029	209	177	96	158	1.83551	1.88757	0.666266	0.86472	162.083	108.947	215.22	1.97545	0.982178	2.97936e-05	0.000128787	NA	NA	0	0	0	0	0	0	0	0	0	0	1
I	4852998	4855199	2202	1	SPAC4F10.11	NULL	1620	1193	1840	2714	4.98741	4.83783	5.12427	5.16462	1763.86	1972.38	1555.34	0.788559	-0.342709	0.00432165	0.0125915	NA	NA	0	0	0	0	0	0	0	0	0	0	1
I	4855376	4856606	1231	1	SPAC4F10.12	NULL	590	380	531	726	4.31444	3.97154	4.11558	4.04648	540.108	548.128	532.087	0.970736	-0.0428491	0.909597	0.994517	NA	NA	0	0	0	0	0	0	0	0	0	0	1
I	4860182	4861502	1321	1	SPNCRNA.1030	c("SPAC4F10.14c", "SPAC4F10.15c")	36	46	10	23	0.178008	0.823454	-1.71681	-1.03556	30.3062	13.7581	46.8544	3.40559	1.76791	0.00532934	0.0151704	NA	NA	0	0	0	0	0	0	0	0	0	0	1
I	4861450	4863757	2308	1	SPNCRNA.1031	c("SPAC4F10.15c", "SPAC4F10.16c")	122	93	72	102	1.1338	1.03404	0.326138	0.308275	97.3775	75.6334	119.122	1.57499	0.655341	0.0201805	0.0499272	NA	NA	0	0	0	0	0	0	0	0	0	0	1
I	4868326	4869283	958	1	SPAC4F10.17	SPAC4F10.16c	98	88	16	19	2.08632	2.22285	-0.575232	-0.847662	59.7649	15.4569	104.073	6.73308	2.75127	1.92552e-12	1.93585e-11	NA	NA	0	0	0	0	0	0	0	0	0	0	1
I	4869147	4870212	1066	1	SPNCRNA.254	SPAC4F10.16c	40107	28631	51014	68319	10.6091	10.4146	10.9092	10.8103	45034.5	52133.2	37935.7	0.727669	-0.458645	1.65182e-05	7.45989e-05	NA	NA	0	0	0	0	0	0	0	0	0	0	1
I	4869466	4870169	704	1	SPNCRNA.1032	SPAC4F10.16c	40105	28630	51013	68318	11.2075	11.0131	11.5078	11.4088	45033.2	52132.3	37934.1	0.727651	-0.458682	1.64901e-05	7.45001e-05	NA	NA	0	0	0	0	0	0	0	0	0	0	1
I	4870284	4872026	1743	1	SPAC4F10.18	SPAC4F10.19c	1913	1503	2625	3732	5.70441	5.64823	6.11403	6.1013	2329.21	2762.35	1896.08	0.686401	-0.542877	2.59372e-06	1.33056e-05	NA	NA	0	0	0	0	0	0	0	0	0	0	1
I	4874165	4875051	887	1	SPAC4F10.20	NULL	5249	4059	3689	5947	8.76177	8.68266	8.2061	8.37467	4651.12	4140.68	5161.56	1.24655	0.317938	0.00480071	0.0138026	NA	NA	0	0	0	0	0	0	0	0	0	0	1
I	4875418	4878120	2703	1	SPAC19B12.01	SPNCRNA.1033	2185	1808	4435	6244	5.06856	5.08713	6.043	6.01618	3433.86	4644.47	2223.25	0.478687	-1.06285	2.06815e-21	3.35035e-20	NA	NA	0	0	0	0	0	0	0	0	0	0	1
I	4878241	4878453	213	1	SPAC4F10.22	NULL	43	41	34	55	3.06704	3.29014	2.68138	2.85492	42.7015	38.2326	47.1705	1.23378	0.303083	0.532982	0.715331	NA	NA	0	0	0	0	0	0	0	0	0	0	1
I	4881385	4881949	565	1	SPNCRNA.255	NULL	1	2	0	1	-3.76643	-2.47473	-16.6096	-4.33355	1.06266	0.368314	1.757	4.7704	2.25411	0.711958	0.862889	NA	NA	0	0	0	0	0	0	0	0	0	0	1
I	4882814	4889915	7102	1	SPAC19B12.03	SPNCRNA.1034	7894	5325	12080	18635	5.52802	5.25186	6.09495	6.19998	10260.5	13250	7270.97	0.548751	-0.865777	3.90535e-16	5.07358e-15	NA	NA	0	0	0	0	0	0	0	0	0	0	1
I	4890186	4890829	644	1	SPAC19B12.04	c("SPNCRNA.1034", "SPAC19B12.05c")	5962	5034	5386	7774	8.70761	8.75533	8.51417	8.52325	5920.32	5710.77	6129.86	1.07339	0.102169	0.37803	0.565185	NA	NA	0	0	0	0	0	0	0	0	0	0	1
I	4897936	4900012	2077	1	SPAC19B12.08	NULL	421	327	333	472	3.20594	3.13323	2.82079	2.80369	382.397	349.896	414.898	1.18577	0.245828	0.137755	0.257452	NA	NA	0	0	0	0	0	0	0	0	0	0	1
I	4900282	4901134	853	1	SPAC19B12.09	NULL	573	536	883	1292	4.96612	5.16164	5.54315	5.5719	782.369	942.691	622.048	0.659864	-0.599759	7.56624e-06	3.59703e-05	NA	NA	0	0	0	0	0	0	0	0	0	0	1
I	4901551	4904311	2761	1	SPAC19B12.10	c("SPAC19B12.11c", "SPAC19B12.12c")	827	621	445	609	3.81338	3.6919	2.87244	2.80472	630.558	459.568	801.548	1.74413	0.802511	2.33272e-08	1.57935e-07	NA	NA	0	0	0	0	0	0	0	0	0	0	1
I	4906912	4909314	2403	1	SPAC19B12.13	NULL	3	1	1	3	-4.2699	-5.56264	-5.90113	-4.83698	1.87562	1.63363	2.11761	1.29626	0.374356	0.998784	1	NA	NA	0	0	0	0	0	0	0	0	0	0	1
I	4911086	4911440	355	1	SPNCRNA.1035	SPAPB8E5.02c	25	20	38	67	1.54767	1.51756	2.10488	2.40268	34.8859	44.7671	25.0047	0.55855	-0.840241	0.0639016	0.135358	NA	NA	0	0	0	0	0	0	0	0	0	0	1
I	4912237	4914182	1946	1	SPAPB8E5.03	SPAPB8E5.04c	2434	1675	2661	4327	5.6983	5.45095	5.78009	5.96112	2631.65	3000.53	2262.78	0.754129	-0.407117	0.00233458	0.0071765	NA	NA	0	0	0	0	0	0	0	0	0	0	1
I	4916603	4917521	919	1	SPAPB8E5.05	NULL	9	16	3	7	-1.0414	0.0804723	-2.67316	-1.97116	9.35796	4.16425	14.5517	3.49442	1.80505	0.0968654	0.192257	NA	NA	0	0	0	0	0	0	0	0	0	0	1
I	4923495	4923891	397	1	SPAPB8E5.08	NULL	10	6	17	5	0.0644313	-0.380715	0.783105	-1.50276	9.78486	10.8292	8.7405	0.807122	-0.309142	0.967668	1	NA	NA	0	0	0	0	0	0	0	0	0	0	1
I	4924227	4926065	1839	1	SPAPB8E5.09	SPAC1B3.01c	2344	2134	2847	4421	5.76773	5.92413	6.00134	6.11591	2820.57	3133.48	2507.66	0.800278	-0.321427	0.00289325	0.00873065	NA	NA	0	0	0	0	0	0	0	0	0	0	1
I	4926480	4928138	1659	1	SPAPB8E5.10	SPAC1B3.01c	54	37	20	24	0.536057	0.282439	-0.94374	-1.20106	34.7565	19.4132	50.0998	2.58071	1.36777	0.00276954	0.00838476	NA	NA	0	0	0	0	0	0	0	0	0	0	1
I	4929567	4931302	1736	1	SPNCRNA.1036	c("SPAC1B3.02c", "SPAC1B3.03c", "SPAC1B3.04c")	52	55	24	31	0.314385	0.687116	-0.847934	-0.99906	42.2835	24.1062	60.4608	2.5081	1.3266	0.00208951	0.00649134	NA	NA	0	0	0	0	0	0	0	0	0	0	1
I	4931204	4933354	2151	1	SPNCRNA.564	c("SPAC1B3.03c", "SPAC1B3.04c")	1668	1184	845	1375	5.0086	4.80596	3.98065	4.16269	1263.31	953.171	1573.46	1.65076	0.723131	1.03285e-08	7.34501e-08	NA	NA	0	0	0	0	0	0	0	0	0	0	1
I	4931323	4933884	2562	1	SPNCRNA.1037	SPAC1B3.04c	1868	1286	870	1384	4.91971	4.67292	3.77045	3.91984	1353.31	969.703	1736.91	1.79118	0.840912	7.64141e-10	6.09485e-09	NA	NA	0	0	0	0	0	0	0	0	0	0	1
I	4934547	4937012	2466	1	SPAC1B3.05	SPNCRNA.1038	2137	1513	3496	4568	5.26818	5.06182	5.93145	5.79694	2772.07	3530.74	2013.41	0.57025	-0.810333	3.56771e-12	3.52194e-11	NA	NA	0	0	0	0	0	0	0	0	0	0	1
I	4942200	4944230	2031	1	SPAC1B3.08	SPAC1B3.09c	2832	2355	2777	3813	5.85512	5.88084	5.77997	5.717	2880.73	2872.54	2888.91	1.0057	0.00819865	0.947015	1	NA	NA	0	0	0	0	0	0	0	0	0	0	1
I	4942226	4942435	210	1	SPAC1B3.21	NULL	151	133	122	192	4.89964	5.00834	4.54512	4.67898	146.969	135.216	158.722	1.17384	0.231242	0.383731	0.571006	NA	NA	0	0	0	0	0	0	0	0	0	0	1
I	4948562	4949118	557	1	SPAC1B3.20	SPAC1B3.11c	559	532	665	940	5.49937	5.71977	5.70302	5.68197	655.188	697.791	612.586	0.877893	-0.187882	0.155187	0.283665	NA	NA	0	0	0	0	0	0	0	0	0	0	1
I	4951337	4954199	2863	1	SPAC1B3.13	SPAC1B3.12c	5198	3701	7737	10971	6.32476	6.12654	6.85172	6.83521	6520.85	8131.21	4910.5	0.603907	-0.727601	2.17231e-11	1.98754e-10	NA	NA	0	0	0	0	0	0	0	0	0	0	1
I	4954542	4955675	1134	1	SPAC1B3.14	SPAC1B3.15c	1854	1801	2411	4247	6.57013	6.8201	6.90227	7.19872	2446.83	2838.89	2054.78	0.723796	-0.466346	0.0196914	0.0488443	NA	NA	0	0	0	0	0	0	0	0	0	0	1
I	4961796	4963074	1279	1	SPNCRNA.1039	NULL	163	148	144	149	2.40341	2.55595	2.17776	1.70664	152.57	131.009	174.13	1.32914	0.410497	0.0699461	0.14615	NA	NA	0	0	0	0	0	0	0	0	0	0	1
I	4962521	4963013	493	1	SPNCRNA.256	NULL	128	107	133	139	3.43004	3.46332	3.43847	2.98177	126.218	121.511	130.925	1.07748	0.107656	0.594693	0.767091	NA	NA	0	0	0	0	0	0	0	0	0	0	1
I	4964526	4966980	2455	1	SPAC1B3.17	NULL	1275	975	1437	2021	4.43026	4.33505	4.55597	4.52761	1375.47	1504.08	1246.86	0.828981	-0.270588	0.031338	0.0731018	NA	NA	0	0	0	0	0	0	0	0	0	0	1
I	4967939	4969888	1950	1	SPAC1952.01	SPAC1B3.18c	969	720	1026	1373	4.54513	4.40845	4.58074	4.48068	991.247	1048.13	934.367	0.891464	-0.165751	0.244852	0.407005	NA	NA	0	0	0	0	0	0	0	0	0	0	1
I	4969822	4970737	916	1	SPAC1952.02	NULL	680	571	1404	2132	5.19429	5.23406	6.19337	6.27567	1112.34	1527.52	697.155	0.456397	-1.13164	1.35431e-18	1.95634e-17	NA	NA	0	0	0	0	0	0	0	0	0	0	1
I	4970821	4972306	1486	1	SPAC1952.03	NULL	452	376	496	710	3.70381	3.73004	3.79097	3.78809	492.448	523.731	461.166	0.88054	-0.183539	0.224833	0.381524	NA	NA	0	0	0	0	0	0	0	0	0	0	1
I	4973601	4975698	2098	1	SPAC1952.05	SPAC1952.06c	1576	1305	2080	3110	4.96274	4.98233	5.3162	5.37617	1924.65	2245.12	1604.17	0.714514	-0.484967	2.70056e-05	0.000117625	NA	NA	0	0	0	0	0	0	0	0	0	0	1
I	4978392	4980303	1912	1	SPAC1952.07	SPAC1952.08c	565	464	1145	1637	3.75024	3.75792	4.7224	4.71775	890.474	1208.27	572.673	0.47396	-1.07716	1.62464e-15	2.0464e-14	NA	NA	0	0	0	0	0	0	0	0	0	0	1
I	4980243	4981189	947	1	SPNCRNA.1040	SPAC1952.08c	30	18	17	41	0.395166	-0.0499822	-0.471109	0.278609	25.155	24.0885	26.2215	1.08855	0.122405	0.906114	0.992064	NA	NA	0	0	0	0	0	0	0	0	0	0	1
I	4986628	4989780	3153	1	SPNCRNA.1041	c("SPAC1952.11c", "SPAC1952.12c")	38	39	22	30	-0.999068	-0.669786	-1.8344	-1.9073	33.0557	22.6805	43.4309	1.9149	0.937271	0.0545369	0.118555	NA	NA	0	0	0	0	0	0	0	0	0	0	1
I	4991106	4993629	2524	1	SPAC1952.13	SPAC1952.14c	2705	2109	2591	3853	5.60572	5.53847	5.49675	5.54886	2729.88	2788.94	2670.82	0.957647	-0.0624343	0.56266	0.744179	NA	NA	0	0	0	0	0	0	0	0	0	0	1
I	4994799	4995315	517	1	SPNCRNA.257	SPAC1952.15c	7	6	3	8	-0.831155	-0.761735	-2.10037	-1.20572	5.89307	4.53257	7.25358	1.60032	0.678365	0.660149	0.826926	NA	NA	0	0	0	0	0	0	0	0	0	0	1
I	4995327	5000816	5490	1	SPAC1952.16	c("SPAC1952.15c", "SPAC1952.17c")	1283	940	1293	1628	3.40244	3.24547	3.36679	3.1788	1255.98	1283.21	1228.75	0.957562	-0.0625623	0.74701	0.885903	NA	NA	0	0	0	0	0	0	0	0	0	0	1
I	5004615	5007087	2473	1	SPAC890.03	SPAC890.04c	1350	1077	1404	1952	4.67686	4.64273	4.68658	4.64163	1404.79	1461.22	1348.36	0.922761	-0.115971	0.355695	0.539997	NA	NA	0	0	0	0	0	0	0	0	0	0	1
I	5009365	5010806	1442	1	SPAC890.05	c("SPAC890.04c", "SPNCRNA.1042")	537	626	1999	2524	3.95041	4.46346	5.79984	5.61591	1323.72	1986.47	660.966	0.332734	-1.58756	6.38631e-15	7.72017e-14	NA	NA	0	0	0	0	0	0	0	0	0	0	1
I	5011683	5016066	4384	1	SPAC890.06	SPAC890.07c	4768	3308	5768	8405	5.53227	5.29666	5.7601	5.78291	5297.32	6145.13	4449.51	0.724071	-0.465798	2.4155e-05	0.000105978	NA	NA	0	0	0	0	0	0	0	0	0	0	1
I	5018030	5018674	645	1	SPAC890.08	NULL	14874	12564	13716	20211	10.1998	10.2481	10.036	10.0749	14995.7	14695.4	15296	1.04087	0.0577905	0.645965	0.814256	NA	NA	0	0	0	0	0	0	0	0	0	0	1
I	5018722	5019072	351	1	SPNCRNA.258	NULL	6	3	12	14	-0.49486	-1.20303	0.458274	0.160307	8.18326	11.5006	4.86589	0.423098	-1.24093	0.255996	0.421591	NA	NA	0	0	0	0	0	0	0	0	0	0	1
I	5019371	5021436	2066	1	SPAC22E12.01	NULL	410	336	835	1154	3.0784	3.08305	4.0577	4.00413	640.804	866.486	415.122	0.479086	-1.06164	4.25208e-13	4.52901e-12	NA	NA	0	0	0	0	0	0	0	0	0	0	1
I	5021952	5024151	2200	1	SPAC22E12.02	SPAC22E12.03c	1500	1208	1373	1977	4.98518	4.96466	4.8107	4.81632	1479.68	1454.04	1505.32	1.03527	0.0500066	0.700592	0.858154	NA	NA	0	0	0	0	0	0	0	0	0	0	1
I	5023945	5024116	172	1	SPNCRNA.52	NULL	9	19	2	9	1.11915	2.48896	-1.09761	0.551936	10.4079	4.37219	16.4437	3.76097	1.91111	0.174302	0.310895	NA	NA	0	0	0	0	0	0	0	0	0	0	1
I	5024830	5026218	1389	1	SPAC22E12.04	SPAC22E12.05c	1461	1166	1391	2037	5.79283	5.75925	5.67514	5.7051	1472.58	1485.66	1459.51	0.982398	-0.0256201	0.812353	0.933514	NA	NA	0	0	0	0	0	0	0	0	0	0	1
I	5029269	5030305	1037	1	SPNCRNA.1043	SPAC22E12.06c	12	13	3	6	-1.05772	-0.650439	-3.10448	-2.62488	8.97124	3.79594	14.1465	3.72676	1.89792	0.0609953	0.13019	NA	NA	0	0	0	0	0	0	0	0	0	0	1
I	5030439	5033261	2823	1	SPAC22E12.07	SPAC22E12.06c	5285	4413	5715	8324	6.28016	6.31183	6.34615	6.36831	5744.97	6087.28	5402.66	0.887533	-0.172128	0.0941149	0.187792	NA	NA	0	0	0	0	0	0	0	0	0	0	1
I	5033373	5034586	1214	1	SPAC22E12.08	SPAC22E12.09c	400	324	537	788	3.83695	3.82476	4.21501	4.24792	488.366	574.135	402.597	0.701224	-0.512053	0.000887848	0.00297536	NA	NA	0	0	0	0	0	0	0	0	0	0	1
I	5055172	5056344	1173	1	SPAC22E12.18	NULL	1372	1189	2803	3628	5.65034	5.73563	6.63418	6.48602	2124.02	2818.15	1429.9	0.50739	-0.978833	8.75828e-17	1.17469e-15	NA	NA	0	0	0	0	0	0	0	0	0	0	1
I	5056600	5059053	2454	1	SPAC22E12.19	NULL	1532	1404	2583	3794	4.69577	4.86171	5.40254	5.43685	2203.89	2762.98	1644.8	0.5953	-0.748312	4.7927e-11	4.22405e-10	NA	NA	0	0	0	0	0	0	0	0	0	0	1
I	5058865	5059013	149	1	SPNCRNA.91	NULL	44	42	76	100	3.61575	3.84045	4.35739	4.23295	62.6541	77.0115	48.2968	0.627138	-0.673145	0.0522491	0.114369	NA	NA	0	0	0	0	0	0	0	0	0	0	1
I	5059273	5062056	2784	1	SPAC2E12.02	SPAC2E12.03c	3343	2400	3021	4259	5.82857	5.64227	5.63559	5.61072	3168.19	3165.81	3170.56	1.0015	0.00216633	0.909086	0.99423	NA	NA	0	0	0	0	0	0	0	0	0	0	1
I	5063258	5066231	2974	1	SPAC2E12.05	SPAC2E12.03c	379	332	526	755	2.40335	2.50415	2.82936	2.83041	476.7	556.165	397.234	0.714238	-0.485524	0.001563	0.00500852	NA	NA	0	0	0	0	0	0	0	0	0	0	1
I	5067494	5069371	1878	1	SPAC1006.01	NULL	6519	4889	3101	5213	7.17094	7.04764	6.05217	6.28118	4936.98	3559.47	6314.49	1.77399	0.827002	7.9663e-14	8.91216e-13	NA	NA	0	0	0	0	0	0	0	0	0	0	1
I	5069559	5070998	1440	1	SPAC1006.02	SPAC1006.03c	1367	1061	1717	2329	5.30043	5.22665	5.58245	5.50191	1556.13	1765.56	1346.69	0.76276	-0.3907	0.00156439	0.00501038	NA	NA	0	0	0	0	0	0	0	0	0	0	1
I	5074150	5077557	3408	1	SPNCRNA.1044	SPAC1006.04c	1085	910	381	565	3.72426	3.76231	2.16757	2.21567	760.609	409.526	1111.69	2.71458	1.44073	4.90012e-24	8.52478e-23	NA	NA	0	0	0	0	0	0	0	0	0	0	1
I	5080718	5085055	4338	1	SPAC1006.06	NULL	3999	2800	5586	8080	5.2914	5.069	5.72672	5.7389	4838.59	5929.21	3747.98	0.632121	-0.661728	2.02392e-09	1.54648e-08	NA	NA	0	0	0	0	0	0	0	0	0	0	1
I	5085486	5087031	1546	1	SPAC1006.07	NULL	66414	50986	74398	109862	10.8004	10.7108	10.9173	10.9593	72435.1	79796.8	65073.4	0.815489	-0.294262	0.0038832	0.0114166	NA	NA	0	0	0	0	0	0	0	0	0	0	1
I	5087986	5089638	1653	1	SPAC1006.08	NULL	662	582	979	1368	4.11045	4.21646	4.62808	4.5904	858.304	1021.44	695.171	0.680582	-0.555159	3.14627e-05	0.000135466	NA	NA	0	0	0	0	0	0	0	0	0	0	1
I	5089815	5094848	5034	1	SPAC1006.09	NULL	2726	2139	4223	6267	4.49057	4.43253	5.07519	5.12434	3620.5	4540.86	2700.15	0.594633	-0.749929	1.14135e-11	1.07121e-10	NA	NA	0	0	0	0	0	0	0	0	0	0	1
I	5096773	5097662	890	1	SPAC1250.04c	NULL	276	208	406	542	3.68635	3.57008	4.1963	4.09275	341.126	414.272	267.979	0.646866	-0.628461	0.000404174	0.00145087	NA	NA	0	0	0	0	0	0	0	0	0	0	1
I	5098866	5100248	1383	1	SPNCRNA.1045	c("SPAC1250.02", "SPAC1250.01")	138	97	193	320	2.05043	1.83363	2.4875	2.69661	174.736	219.897	129.575	0.589252	-0.763043	0.000566183	0.00197974	NA	NA	0	0	0	0	0	0	0	0	0	0	1
I	5103586	5104491	906	1	SPNCRNA.1046	c("SPAC1250.01", "SPAC29A4.20")	30	27	19	20	0.459018	0.598828	-0.246794	-0.69315	24.6545	17.4113	31.8976	1.83201	0.873425	0.10582	0.206916	NA	NA	0	0	0	0	0	0	0	0	0	0	1
I	5106559	5113025	6467	1	SPAC29A4.19c	SPAC29A4.18	1180	673	1013	1451	2.95321	2.43491	2.6862	2.68425	1039.64	1069.98	1009.31	0.943292	-0.084223	0.816159	0.936006	NA	NA	0	0	0	0	0	0	0	0	0	0	1
I	5113027	5114151	1125	1	SPAC29A4.17c	SPAC29A4.16	203	146	93	137	3.05498	2.87128	1.88195	1.92046	146.161	99.6267	192.695	1.93417	0.951712	6.36971e-05	0.000263027	NA	NA	0	0	0	0	0	0	0	0	0	0	1
I	5119515	5121734	2220	1	SPAC29A4.14c	c("SPNCRNA.1047", "SPAC29A4.13")	2060	1725	2275	3187	5.37759	5.41335	5.47395	5.43992	2242.76	2376.58	2108.95	0.887389	-0.172362	0.128176	0.242226	NA	NA	0	0	0	0	0	0	0	0	0	0	1
I	5124392	5124613	222	1	SPAC29A4.22	SPAC29A4.11	9	12	0	5	0.751002	1.45785	-16.6096	-0.664199	6.93526	1.84157	12.0289	6.5319	2.7075	0.0371883	0.0846593	NA	NA	0	0	0	0	0	0	0	0	0	0	1
I	5124554	5125643	1090	1	SPAC29A4.12c	SPAC29A4.11	168	166	20	37	2.67769	2.95223	-0.439536	-0.0723779	106.081	24.2013	187.961	7.76655	2.95727	6.37472e-18	8.96044e-17	NA	NA	0	0	0	0	0	0	0	0	0	0	1
I	5129191	5131963	2773	1	SPNCRNA.1049	c("SPAC29A4.10", "SPAC29A4.09")	97	94	59	67	0.538175	0.784664	-0.225943	-0.562855	81.6153	55.8695	107.361	1.92164	0.942341	0.00212395	0.00657789	NA	NA	0	0	0	0	0	0	0	0	0	0	1
I	5133204	5135342	2139	1	SPAC29A4.08c	SPAC29A4.07	1490	1301	2060	2286	5.26016	5.35628	5.68063	5.31045	1745.04	1931.06	1559.02	0.807341	-0.30875	0.187232	0.328684	NA	NA	0	0	0	0	0	0	0	0	0	0	1
I	5136040	5137368	1329	1	SPAC29A4.06c	c("SPNCRNA.1050", "SPAC29A4.05")	786	626	1330	1731	4.66407	4.62752	5.37604	5.23586	1062.54	1340.7	784.381	0.585052	-0.773364	4.12778e-09	3.05486e-08	NA	NA	0	0	0	0	0	0	0	0	0	0	1
I	5140322	5142190	1869	1	SPAC29A4.04c	SPNCRNA.1051	13334	11362	19686	28870	8.21026	8.27118	8.72546	8.7575	17407.8	21040.9	13774.7	0.654662	-0.611179	2.2399e-09	1.70283e-08	NA	NA	0	0	0	0	0	0	0	0	0	0	1
I	5142407	5143810	1404	1	SPAC29A4.03c	NULL	1860	1431	1670	2391	5.7833	5.69684	5.58099	5.57839	1793.97	1763.54	1824.4	1.03451	0.0489437	0.667377	0.833328	NA	NA	0	0	0	0	0	0	0	0	0	0	1
I	5143745	5145515	1771	1	SPAC29A4.02c	NULL	54560	41195	63424	89674	10.5816	10.468	10.7519	10.7312	59791.3	66559.5	53023.1	0.796627	-0.328024	0.0016221	0.00517176	NA	NA	0	0	0	0	0	0	0	0	0	0	1
I	5144133	5144206	74	1	SPSNORNA.15	NULL	2647	2242	10752	15967	10.5362	10.5884	12.5115	12.5616	7145.62	11565.3	2725.95	0.235701	-2.08497	5.87883e-80	2.2053e-78	NA	NA	0	0	0	0	0	0	0	0	0	0	1
I	5146123	5148353	2231	1	SPAC26F1.14c	NULL	864	583	1269	1907	4.0069	3.73118	4.51463	4.58188	1084.6	1373.28	795.921	0.579579	-0.786924	1.82899e-09	1.40829e-08	NA	NA	0	0	0	0	0	0	0	0	0	0	1
I	5148780	5152492	3713	1	SPAC26F1.13c	SPNCRNA.1052	37529	27172	40207	59399	8.71283	8.53876	8.76542	8.80805	39436.1	43134.3	35737.8	0.828523	-0.271386	0.00932999	0.0250609	NA	NA	0	0	0	0	0	0	0	0	0	0	1
I	5152528	5153825	1298	1	SPNCRNA.1053	SPNCRNA.1052	163	113	95	139	2.38214	2.14541	1.55641	1.58514	126.739	101.421	152.057	1.49926	0.584255	0.0188584	0.0470246	NA	NA	0	0	0	0	0	0	0	0	0	0	1
I	5153823	5155228	1406	1	SPAC26F1.12c	SPNCRNA.1052	1552	1061	2393	3594	5.61455	5.35766	6.19239	6.25879	2013.63	2588.86	1438.39	0.555606	-0.847866	9.89297e-13	1.01587e-11	NA	NA	0	0	0	0	0	0	0	0	0	0	1
I	5161474	5163360	1887	1	SPAC26F1.10c	NULL	1250	597	810	1487	4.78132	4.00701	4.10853	4.46458	985.993	975.918	996.069	1.02065	0.0294858	0.904812	0.991272	NA	NA	0	0	0	0	0	0	0	0	0	0	1
I	5167038	5170528	3491	1	SPAC26F1.08c	NULL	1146	930	1684	2278	3.78633	3.77684	4.29476	4.21027	1441.93	1729.33	1154.54	0.667624	-0.582893	2.40041e-06	1.23615e-05	NA	NA	0	0	0	0	0	0	0	0	0	0	1
I	5172196	5172341	146	1	SPNCRNA.90	SPNCRNA.1055	0	10	2	3	-16.6096	1.79941	-0.86117	-0.796571	4.23456	2.16231	6.3068	2.91669	1.54433	0.662249	0.828778	NA	NA	0	0	0	0	0	0	0	0	0	0	1
I	5174913	5176145	1233	1	SPNCRNA.1056	SPAC26F1.05	44	49	99	125	0.566969	1.01406	1.69003	1.5061	75.5453	98.3791	52.7116	0.535801	-0.900231	0.00448341	0.0129997	NA	NA	0	0	0	0	0	0	0	0	0	0	1
I	5177808	5179736	1929	1	SPAC26F1.04c	c("SPNCRNA.1057", "SPAC26F1.03")	2343	1988	1301	2035	5.65599	5.71076	4.7604	4.88544	1926.21	1437.34	2415.08	1.68025	0.748673	6.00578e-10	4.832e-09	NA	NA	0	0	0	0	0	0	0	0	0	0	1
I	5177861	5178194	334	1	SPNCRNA.260	SPNCRNA.1057	3	2	2	2	-1.42322	-1.71636	-2.05502	-2.57535	2.27114	1.794	2.74829	1.53193	0.615354	0.847855	0.956233	NA	NA	0	0	0	0	0	0	0	0	0	0	1
I	5187647	5189187	1541	1	SPAPJ691.02	NULL	323	277	125	181	3.12123	3.19139	1.70477	1.71847	233.771	132.75	334.791	2.52196	1.33454	4.88303e-11	4.29421e-10	NA	NA	0	0	0	0	0	0	0	0	0	0	1
I	5189537	5190444	908	1	SPAPJ691.03	NULL	476	432	692	946	4.95515	5.10704	5.44811	5.37881	611.327	714.275	508.38	0.711742	-0.490574	0.000660733	0.00227849	NA	NA	0	0	0	0	0	0	0	0	0	0	1
I	5200663	5202023	1361	1	SPNCRNA.1059	SPNCRNA.1058	16	9	58	73	-1.03494	-1.57318	0.776167	0.587649	35.5785	57.5507	13.6064	0.236425	-2.08055	2.98086e-05	0.000128806	NA	NA	0	0	0	0	0	0	0	0	0	0	1
I	5202366	5205202	2837	1	SPAC19D5.01	SPAC19D5.02c	243	171	253	383	1.83015	1.61501	1.84148	1.91932	251.554	274.822	228.287	0.830675	-0.267644	0.173657	0.310113	NA	NA	0	0	0	0	0	0	0	0	0	0	1
I	5206595	5208422	1828	1	SPAC19D5.03	NULL	614	440	463	710	3.97313	3.78421	3.51905	3.6155	544.054	506.284	581.824	1.1492	0.200635	0.18064	0.320202	NA	NA	0	0	0	0	0	0	0	0	0	0	1
I	5208643	5218739	10097	1	SPAC19D5.04	NULL	12915	7812	12397	18993	5.73061	5.29714	5.62469	5.71981	12438.8	13549.5	11328.1	0.836053	-0.258334	0.186599	0.327715	NA	NA	0	0	0	0	0	0	0	0	0	0	1
I	5219594	5220187	594	1	SPNCRNA.1060	c("SPAC19D5.05c", "SPAC19D5.11c")	94	120	74	95	2.71576	3.35987	2.32377	2.16381	98.1923	74.1125	122.272	1.64982	0.722305	0.125643	0.238341	NA	NA	0	0	0	0	0	0	0	0	0	0	1
I	5222447	5224795	2349	1	SPAC19D5.07	SPAC14C4.01c	435	360	627	876	2.94253	2.96132	3.42312	3.38522	548.389	654.129	442.649	0.676701	-0.56341	0.000178486	0.000682339	NA	NA	0	0	0	0	0	0	0	0	0	0	1
I	5224998	5226317	1320	1	SPNCRNA.1061	c("SPAC14C4.01c", "SPAC14C4.02c")	204	159	303	420	2.68159	2.61386	3.20548	3.15619	258.136	314.883	201.389	0.639567	-0.644832	0.000855111	0.00287528	NA	NA	0	0	0	0	0	0	0	0	0	0	1
I	5229798	5230900	1103	1	SPAC14C4.16	c("SPAC14C4.02c", "SPNCRNA.1062")	205	154	296	529	2.99697	2.8761	3.48009	3.7974	275.03	351.329	198.731	0.565656	-0.822002	5.523e-05	0.000230362	NA	NA	0	0	0	0	0	0	0	0	0	0	1
I	5231140	5232566	1427	1	SPAC14C4.03	NULL	96	91	92	131	1.57459	1.78923	1.46633	1.45583	100.931	96.8882	104.974	1.08345	0.115634	0.739586	0.879619	NA	NA	0	0	0	0	0	0	0	0	0	0	1
I	5233954	5235661	1708	1	SPAC14C4.04	SPAC14C4.05c	1984	1580	1988	2785	5.59159	5.55492	5.54764	5.51364	2028.3	2076.78	1979.83	0.953316	-0.068973	0.564683	0.746033	NA	NA	0	0	0	0	0	0	0	0	0	0	1
I	5240350	5242915	2566	1	SPAC14C4.07	SPAC14C4.06c	1169	1064	1576	2153	4.24124	4.39728	4.62538	4.55509	1438.32	1626.19	1250.45	0.768945	-0.379047	0.00157854	0.00504764	NA	NA	0	0	0	0	0	0	0	0	0	0	1
I	5242952	5244114	1163	1	SPAC14C4.08	NULL	160	136	214	326	2.51378	2.57113	2.88646	2.97336	199.142	233.209	165.075	0.707843	-0.498499	0.0152397	0.0389643	NA	NA	0	0	0	0	0	0	0	0	0	0	1
I	5243953	5245966	2014	1	SPAC14C4.09	SPAC14C4.10c	2120	1534	6584	9706	5.44949	5.27453	7.03753	7.07708	4536.97	7055.72	2018.22	0.286041	-1.80571	6.40765e-58	1.87147e-56	NA	NA	0	0	0	0	0	0	0	0	0	0	1
I	5247703	5250638	2936	1	SPAC14C4.11	SPAC14C4.12c	6028	4757	11229	16781	6.51879	6.46898	7.36941	7.42865	9052.58	12117.3	5987.88	0.49416	-1.01695	6.99198e-22	1.15133e-20	NA	NA	0	0	0	0	0	0	0	0	0	0	1
I	5252427	5252941	515	1	SPNCRNA.261	NULL	28	29	48	50	1.17442	1.51686	1.90517	1.4437	37.9801	43.7926	32.1677	0.734547	-0.445074	0.34037	0.52295	NA	NA	0	0	0	0	0	0	0	0	0	0	1
I	5253235	5255892	2658	1	SPAC14C4.13	NULL	339	188	414	629	2.45983	1.90109	2.70132	2.78438	368.568	450.545	286.591	0.636097	-0.65268	0.00224781	0.00693465	NA	NA	0	0	0	0	0	0	0	0	0	0	1
I	5256726	5261958	5233	1	SPAC14C4.14	c("SPAC14C4.15c", "SPAPJ760.02c")	8833	5958	13960	21635	6.25686	5.9806	6.87033	6.98203	11742.3	15348.9	8135.6	0.530044	-0.915816	3.2429e-17	4.45398e-16	NA	NA	0	0	0	0	0	0	0	0	0	0	1
I	5267175	5269088	1914	1	SPNCRNA.1064	SPNCRNA.1063	29	28	19	40	-0.668887	-0.427702	-1.32578	-0.772156	28.4051	24.7776	32.0327	1.29281	0.370509	0.568557	0.749913	NA	NA	0	0	0	0	0	0	0	0	0	0	1
I	5272461	5272835	375	1	SPAC2H10.04	NULL	10	9	2	1	0.146679	0.286489	-2.22205	-3.74229	6.02911	1.42568	10.6325	7.45785	2.89876	0.02295	0.055824	NA	NA	0	0	0	0	0	0	0	0	0	0	1
I	5273012	5275983	2972	1	SPAC2H10.01	NULL	750	627	2230	3667	3.38901	3.4224	4.91424	5.11143	1648.37	2529.57	767.168	0.303279	-1.72128	1.04469e-27	1.99688e-26	NA	NA	0	0	0	0	0	0	0	0	0	0	1
I	5276193	5277245	1053	1	SPNCRNA.1066	SPAC2H10.02c	28	16	15	25	0.142563	-0.372973	-0.804745	-0.588146	20.5535	17.1381	23.9689	1.39857	0.483952	0.424909	0.612844	NA	NA	0	0	0	0	0	0	0	0	0	0	1
I	5286053	5287290	1238	1	SPAC11E3.03	SPAC11E3.04c	741	619	897	1174	4.80815	4.84043	5.03693	4.90482	832.147	906.631	757.662	0.835689	-0.258962	0.0611961	0.130513	NA	NA	0	0	0	0	0	0	0	0	0	0	1
I	5288245	5292558	4314	1	SPAC11E3.05	SPNCRNA.1067	2508	1830	2576	3680	4.593	4.43012	4.58474	4.57895	2557.25	2717.29	2397.22	0.882209	-0.180808	0.128476	0.242679	NA	NA	0	0	0	0	0	0	0	0	0	0	1
I	5292648	5294751	2104	1	SPAC11E3.06	SPNCRNA.1067	70	54	155	216	0.730813	0.648232	1.83079	1.78919	115.127	161.502	68.7517	0.425702	-1.23209	5.38816e-06	2.63675e-05	NA	NA	0	0	0	0	0	0	0	0	0	0	1
I	5294961	5296384	1424	1	SPAC11E3.07	SPAC11E3.08c	4462	3604	4468	6893	7.02323	7.00695	6.97831	7.08345	4692.74	4900.95	4484.53	0.915032	-0.128107	0.200867	0.348154	NA	NA	0	0	0	0	0	0	0	0	0	0	1
I	5298656	5300189	1534	1	SPAC11E3.09	NULL	855	692	1350	1950	4.63448	4.62114	5.24658	5.25673	1146.07	1431.94	860.205	0.600728	-0.735216	7.87195e-09	5.67196e-08	NA	NA	0	0	0	0	0	0	0	0	0	0	1
I	5300670	5301956	1287	1	SPAC11E3.10	NULL	627	436	758	1172	4.83018	4.59786	5.05706	5.1654	709.076	832.407	585.744	0.703675	-0.507019	0.000352367	0.00127982	NA	NA	0	0	0	0	0	0	0	0	0	0	1
I	5305696	5308686	2991	1	SPAC11E3.12	c("SPAC11E3.11c", "SPAC11E3.13c")	631	575	512	713	3.20683	3.36457	2.85848	2.81588	604.343	533.295	675.391	1.26645	0.340791	0.0243175	0.058663	NA	NA	0	0	0	0	0	0	0	0	0	0	1
I	5309241	5311409	2169	1	SPNCRNA.1069	SPNCRNA.1068	319	213	389	574	2.61009	2.3192	2.84944	2.89036	354.758	417.071	292.445	0.701187	-0.512128	0.00356648	0.0105683	NA	NA	0	0	0	0	0	0	0	0	0	0	1
I	5311344	5314362	3019	1	SPAC11E3.14	SPNCRNA.1068	2713	1838	2217	3260	5.2213	4.95136	4.88317	4.91907	2438.33	2372.8	2503.87	1.05524	0.0775686	0.436412	0.622542	NA	NA	0	0	0	0	0	0	0	0	0	0	1
I	5314778	5315429	652	1	SPAC11E3.15	NULL	17806	13547	22647	37070	10.3923	10.2897	10.6924	10.8829	21497.9	25626.5	17369.2	0.677783	-0.561104	9.70125e-07	5.2694e-06	NA	NA	0	0	0	0	0	0	0	0	0	0	1
I	5315770	5317020	1251	1	SPNCRNA.1070	SPAP8A3.02c	106	86	127	167	1.81454	1.8047	2.02845	1.90311	117.714	128.651	106.777	0.829968	-0.268873	0.322854	0.503504	NA	NA	0	0	0	0	0	0	0	0	0	0	1
I	5317424	5317575	152	1	SPNCRNA.263	NULL	6	3	0	4	0.712528	0.00434784	-16.6096	-0.439642	3.16957	1.47325	4.86589	3.30282	1.7237	0.401811	0.589506	NA	NA	0	0	0	0	0	0	0	0	0	0	1
I	5317857	5319528	1672	1	SPAP8A3.03	NULL	1590	1155	1886	2756	5.30294	5.13362	5.50238	5.52927	1764.34	2012.17	1516.51	0.753666	-0.408003	0.000720836	0.00246381	NA	NA	0	0	0	0	0	0	0	0	0	0	1
I	5321727	5325075	3349	1	SPAP8A3.05	SPNCRNA.1071	1210	871	928	1168	3.99194	3.80949	3.56227	3.37375	1034.93	920.811	1149.05	1.24787	0.319465	0.00812424	0.0221342	NA	NA	0	0	0	0	0	0	0	0	0	0	1
I	5325582	5326435	854	1	SPAP8A3.06	SPAP8A3.07c	916	679	1036	1496	5.4766	5.33647	5.60735	5.61707	990.478	1098.72	882.24	0.802974	-0.316575	0.0172563	0.0435361	NA	NA	0	0	0	0	0	0	0	0	0	0	1
I	5326840	5328155	1316	1	SPNCRNA.1072	SPAP8A3.07c	9	9	1	4	-1.81648	-1.52468	-5.03284	-3.55351	6.06942	2.00194	10.1369	5.06354	2.34015	0.0756908	0.156142	NA	NA	0	0	0	0	0	0	0	0	0	0	1
I	5328400	5329064	665	1	SPNCRNA.525	c("SPAP8A3.07c", "SPNCRNA.1073")	22	21	16	20	0.457716	0.682414	-0.0485669	-0.246999	19.9868	15.8252	24.1484	1.52594	0.609701	0.333457	0.515163	NA	NA	0	0	0	0	0	0	0	0	0	0	1
I	5329177	5331057	1881	1	SPAP8A3.08	SPAP8A3.09c	3804	2812	3740	5195	6.60879	6.46468	6.53746	6.49118	3774.78	3890.67	3658.9	0.940427	-0.0886117	0.473565	0.661642	NA	NA	0	0	0	0	0	0	0	0	0	0	1
I	5334103	5334807	705	1	SPAP8A3.10	NULL	984	766	1367	1852	6.00059	5.93109	6.42801	6.34572	1187.82	1404.83	970.813	0.691054	-0.53313	3.35729e-05	0.00014388	NA	NA	0	0	0	0	0	0	0	0	0	0	1
I	5340572	5342997	2426	1	SPNCRNA.1074	c("SPAP8A3.12c", "SPAP8A3.13c")	264	233	246	356	2.17552	2.28712	2.02678	2.03964	269.487	261.176	277.798	1.06364	0.0890123	0.690652	0.850429	NA	NA	0	0	0	0	0	0	0	0	0	0	1
I	5353770	5354310	541	1	SPNCRNA.1075	SPAC4D7.15	14	5	3	2	0.103368	-1.09023	-2.16583	-3.27108	6.20754	2.32268	10.0924	4.34514	2.1194	0.0613326	0.13077	NA	NA	0	0	0	0	0	0	0	0	0	0	1
I	5354801	5357385	2585	1	SPAC4D7.03	SPAC4D7.04c	1084	798	1582	2129	4.12169	3.9716	4.62021	4.52828	1330.54	1620.52	1040.56	0.642114	-0.639098	4.99668e-07	2.8194e-06	NA	NA	0	0	0	0	0	0	0	0	0	0	1
I	5358881	5360504	1624	1	SPAC4D7.05	c("SPNCRNA.1076", "SPAC4D7.06c")	8811	6880	11553	16626	8.23621	8.17113	8.58024	8.58506	10468.8	12231.5	8706.18	0.711785	-0.490488	3.03157e-06	1.53484e-05	NA	NA	0	0	0	0	0	0	0	0	0	0	1
I	5360569	5361844	1276	1	SPNCRNA.1077	c("SPAC4D7.06c", "SPAC4D7.07c")	125	108	98	133	2.02386	2.10478	1.62593	1.54614	115.433	100.797	130.069	1.2904	0.367823	0.167607	0.301236	NA	NA	0	0	0	0	0	0	0	0	0	0	1
I	5366784	5367314	531	1	SPNCRNA.264	NULL	33	22	10	19	1.36732	1.07417	-0.401992	0.00363985	21.258	12.2848	30.2312	2.46086	1.29916	0.0321863	0.0747464	NA	NA	0	0	0	0	0	0	0	0	0	0	1
I	5367360	5369378	2019	1	SPAC4D7.09	NULL	2929	2505	3799	5152	6.19732	6.26354	6.52567	6.44483	3468.81	3906.03	3031.59	0.776131	-0.365628	0.000921862	0.00307817	NA	NA	0	0	0	0	0	0	0	0	0	0	1
I	5370228	5372083	1856	1	SPNCRNA.1078	SPAC4D7.10c	81	80	35	64	0.857362	1.13125	-0.40005	-0.0497001	66.3388	42.0761	90.6014	2.15328	1.10653	0.00193226	0.00604191	NA	NA	0	0	0	0	0	0	0	0	0	0	1
I	5372018	5373807	1790	1	SPAC4D7.11	SPAC4D7.14	451	281	474	912	3.52004	3.1293	3.54495	3.96873	493.627	586.499	400.756	0.683302	-0.549405	0.0547445	0.118961	NA	NA	0	0	0	0	0	0	0	0	0	0	1
I	5375546	5377762	2217	1	SPAC4D7.13	NULL	2742	2111	4033	6033	5.6821	5.59662	6.19187	6.25253	3522.32	4354.23	2690.42	0.617886	-0.694586	3.54692e-10	2.91587e-09	NA	NA	0	0	0	0	0	0	0	0	0	0	1
I	5377829	5382913	5085	1	SPAC3G6.01	NULL	3856	3044	6460	8867	5.14212	5.0928	5.8397	5.77625	5256.07	6681.15	3830.99	0.573403	-0.80238	1.83453e-13	2.00015e-12	NA	NA	0	0	0	0	0	0	0	0	0	0	1
I	5383013	5383811	799	1	SPAC3G6.02	SPAC3G6.03c	1888	1748	2363	3140	6.90719	7.08785	7.18409	7.07388	2222	2405.79	2038.2	0.847207	-0.239213	0.0512319	0.11247	NA	NA	0	0	0	0	0	0	0	0	0	0	1
I	5385758	5387132	1375	1	SPAC3G6.04	NULL	1198	1020	2328	2990	5.17668	5.23644	6.08829	5.92898	1784.56	2332.04	1237.07	0.530469	-0.91466	3.09629e-14	3.55333e-13	NA	NA	0	0	0	0	0	0	0	0	0	0	1
I	5387559	5387641	83	1	SPSNORNA.19	NULL	4064	2991	6615	9558	10.9891	10.8387	11.6451	11.6557	5459.13	7017.6	3900.65	0.555839	-0.847261	7.49302e-15	9.01265e-14	NA	NA	0	0	0	0	0	0	0	0	0	0	1
I	5387884	5389677	1794	1	SPAC3G6.05	SPAC3G6.06c	1466	1174	988	1679	5.2448	5.21616	4.62864	4.8733	1303.88	1140.74	1467.03	1.28603	0.362928	0.00600887	0.0168884	NA	NA	0	0	0	0	0	0	0	0	0	0	1
I	5387957	5388056	100	1	SPNCRNA.265	NULL	5	1	1	2	1.05356	-0.976529	-1.31519	-0.835564	2.1871	1.26531	3.10889	2.45701	1.29691	0.585584	0.762568	NA	NA	0	0	0	0	0	0	0	0	0	0	1
I	5389615	5390903	1289	1	SPNCRNA.1079	SPAC3G6.06c	73	55	71	67	1.23328	1.11663	1.14635	0.542329	66.5415	62.2137	70.8693	1.13913	0.187928	0.487196	0.673922	NA	NA	0	0	0	0	0	0	0	0	0	0	1
I	5392191	5392898	708	1	SPAC3G6.07	NULL	13	17	1	5	-0.391662	0.287168	-4.13872	-2.33734	9.76758	2.37025	17.1649	7.2418	2.85635	0.00630544	0.0176147	NA	NA	0	0	0	0	0	0	0	0	0	0	1
I	5393499	5394534	1036	1	SPAC3G6.08	SPAC3G6.09c	1166	915	884	1210	5.54603	5.48812	5.09972	5.03225	1034	913.018	1154.99	1.26503	0.339167	0.0078534	0.0214991	NA	NA	0	0	0	0	0	0	0	0	0	0	1
I	5398266	5398698	433	1	SPNCRNA.266	NULL	1	0	0	4	-3.38259	-16.6096	-16.6096	-1.9499	0.984448	1.47325	0.495642	0.336427	-1.57164	0.784016	0.914342	NA	NA	0	0	0	0	0	0	0	0	0	0	1
I	5398679	5402410	3732	1	SPAC3G6.11	SPAC3G6.13c	868	696	1065	1660	3.32005	3.29326	3.56828	3.68825	1021.81	1174.45	869.171	0.740066	-0.434275	0.00062435	0.00216485	NA	NA	0	0	0	0	0	0	0	0	0	0	1
I	5402653	5403044	392	1	SPNCRNA.267	NULL	6	2	5	1	-0.65424	-1.94736	-0.964125	-3.80624	3.62348	3.01174	4.23521	1.40623	0.491837	0.697225	0.855164	NA	NA	0	0	0	0	0	0	0	0	0	0	1
I	5403181	5408330	5150	1	SPAC29B12.01	SPAC29B12.02c	6329	5033	8107	11487	5.67289	5.63414	5.98322	5.96562	7414	8516.87	6311.13	0.741015	-0.432425	4.71403e-05	0.000198273	NA	NA	0	0	0	0	0	0	0	0	0	0	1
I	5411152	5411543	392	1	SPNCRNA.268	NULL	14	19	21	37	0.568139	1.30052	1.10624	1.40301	21.826	24.73	18.9219	0.76514	-0.386204	0.451488	0.638208	NA	NA	0	0	0	0	0	0	0	0	0	0	1
I	5411817	5413219	1403	1	SPAC29B12.03	NULL	1016	896	961	1390	4.90987	5.02035	4.78272	4.79484	1044.34	1020.02	1068.66	1.04768	0.0672041	0.673087	0.838843	NA	NA	0	0	0	0	0	0	0	0	0	0	1
I	5413747	5414846	1100	1	SPNCRNA.269	SPNCRNA.1080	39	48	45	59	0.557609	1.14898	0.717203	0.587631	47.562	45.5214	49.6027	1.08966	0.123875	0.842912	0.953209	NA	NA	0	0	0	0	0	0	0	0	0	0	1
I	5414891	5416193	1303	1	SPAC29B12.04	SPNCRNA.1080	3492	2664	3869	6245	6.7977	6.69906	6.89875	7.06913	3878.26	4345.6	3410.91	0.784912	-0.349398	0.00107591	0.00355694	NA	NA	0	0	0	0	0	0	0	0	0	0	1
I	5416345	5417406	1062	1	SPNCRNA.1081	c("SPAC29B12.05c", "SPAC29B12.06c")	51	65	33	67	0.995349	1.6371	0.320466	0.821795	54.1978	42.1236	66.272	1.57327	0.653769	0.240906	0.401979	NA	NA	0	0	0	0	0	0	0	0	0	0	1
I	5419733	5426266	6534	1	SPAC29B12.07	SPNCRNA.1082	9846	6851	12165	15611	5.96706	5.73565	6.22533	6.06479	10691	12181.2	9200.88	0.755334	-0.404813	0.00171285	0.00542652	NA	NA	0	0	0	0	0	0	0	0	0	0	1
I	5426943	5428044	1102	1	SPNCRNA.270	c("SPNCRNA.1082", "SPNCRNA.1083")	14	12	32	46	-0.923042	-0.853621	0.222733	0.225932	24.1838	33.8604	14.5072	0.428441	-1.22283	0.0302974	0.0710192	NA	NA	0	0	0	0	0	0	0	0	0	0	1
I	5427297	5431523	4227	1	SPAC29B12.08	SPNCRNA.1083	1227	620	1173	1720	3.81025	3.11727	3.69847	3.73031	1126.41	1253.65	999.175	0.797014	-0.327323	0.311983	0.489805	NA	NA	0	0	0	0	0	0	0	0	0	0	1
I	5437747	5437828	82	1	SPATRNASER.04	NULL	0	0	0	0	-16.6096	-16.6096	-16.6096	-16.6096	0	0	0	NA	NA	NA	NA	NA	NA	0	0	0	0	0	0	0	0	0	0	1
I	5438212	5438553	342	1	SPAC29B12.12	NULL	72	72	36	51	3.12756	3.41937	2.0807	2.06284	59.4559	37.8167	81.0952	2.14443	1.10059	0.00265697	0.00808062	NA	NA	0	0	0	0	0	0	0	0	0	0	1
I	5438983	5439489	507	1	SPAC29B12.13	NULL	199	177	161	194	4.02627	4.14906	3.6737	3.42234	183.417	156.571	210.263	1.34292	0.425377	0.0461582	0.102589	NA	NA	0	0	0	0	0	0	0	0	0	0	1
I	5442521	5442742	222	1	SPNCRNA.271	SPAC29B12.14c	1	0	4	0	-2.41885	-16.6096	-0.465767	-16.6096	1.30519	2.11474	0.495642	0.234375	-2.09311	0.75657	0.894431	NA	NA	0	0	0	0	0	0	0	0	0	0	1
I	5442999	5443180	182	1	SPNCRNA.272	NULL	0	1	0	1	-16.6096	-1.84044	-16.6096	-2.69943	0.499497	0.368314	0.63068	1.71235	0.775974	1	1	NA	NA	0	0	0	0	0	0	0	0	0	0	1
I	5444019	5444123	105	1	SPNCRNA.273	NULL	1	0	1	0	-1.33872	-16.6096	-1.38558	-16.6096	0.512164	0.528686	0.495642	0.937499	-0.0931114	1	1	NA	NA	0	0	0	0	0	0	0	0	0	0	1
I	5444360	5447537	3178	1	SPAC1039.01	NULL	483	385	1376	1666	2.77616	2.74081	4.23969	3.99523	911.644	1341.08	482.207	0.359566	-1.47567	9.58847e-15	1.143e-13	NA	NA	0	0	0	0	0	0	0	0	0	0	1
I	5448735	5451642	2908	1	SPAC1039.02	NULL	5274	4539	5222	5265	6.23436	6.30965	6.1732	5.66467	5088.32	4699.97	5476.67	1.16526	0.220649	0.311144	0.488851	NA	NA	0	0	0	0	0	0	0	0	0	0	1
I	5452105	5453867	1763	1	SPAC1039.03	NULL	1006	786	1258	1691	4.56608	4.50187	4.84173	4.74811	1141.12	1287.9	994.331	0.772053	-0.373228	0.00416544	0.0121867	NA	NA	0	0	0	0	0	0	0	0	0	0	1
I	5454583	5456656	2074	1	SPAC1039.04	NULL	651	547	794	1189	3.7038	3.7445	3.94342	4.0056	762.673	857.701	667.645	0.778412	-0.361394	0.0071513	0.0197434	NA	NA	0	0	0	0	0	0	0	0	0	0	1
I	5459203	5460261	1059	1	SPNCRNA.1084	SPAC1039.05c	66	50	101	112	1.3714	1.26267	1.93836	1.56714	79.4474	94.6484	64.2464	0.67879	-0.558962	0.0941977	0.187926	NA	NA	0	0	0	0	0	0	0	0	0	0	1
I	5459453	5459867	415	1	SPNCRNA.274	SPAC1039.05c	14	15	45	41	0.485882	0.877229	2.12352	1.46886	27.6455	38.8917	16.3992	0.421663	-1.24584	0.021887	0.0535833	NA	NA	0	0	0	0	0	0	0	0	0	0	1
I	5460198	5462354	2157	1	SPAC1039.06	SPAC1039.07c	1613	1255	1389	1845	4.95621	4.88596	4.69365	4.58286	1502.43	1413.88	1590.97	1.12525	0.170248	0.138993	0.25924	NA	NA	0	0	0	0	0	0	0	0	0	0	1
I	5462490	5463916	1427	1	SPNCRNA.1085	SPAC1039.07c	27	30	21	28	-0.348379	0.095433	-0.757799	-0.863122	26.859	21.4152	32.3027	1.5084	0.593023	0.289289	0.463203	NA	NA	0	0	0	0	0	0	0	0	0	0	1
I	5463863	5465172	1310	1	SPAC1039.08	c("SPAC1039.07c", "SPNCRNA.1086")	303	269	403	502	3.26331	3.38341	3.62791	3.42446	358.893	397.954	319.833	0.803693	-0.315284	0.069561	0.145548	NA	NA	0	0	0	0	0	0	0	0	0	0	1
I	5465093	5465740	648	1	SPNCRNA.275	SPNCRNA.1086	2	2	8	3	-2.96425	-2.67246	-1.01119	-2.94651	3.79354	5.33443	2.25264	0.422284	-1.24371	0.531195	0.713332	NA	NA	0	0	0	0	0	0	0	0	0	0	1
I	5465377	5468649	3273	1	SPAC1039.09	SPNCRNA.1086	108	82	165	243	0.453985	0.348464	1.01856	1.05669	140.989	176.733	105.245	0.595502	-0.747821	0.00215618	0.00666567	NA	NA	0	0	0	0	0	0	0	0	0	0	1
I	5470432	5471520	1089	1	SPAC1039.10	SPAC1039.11c	36	25	34	57	0.601439	0.367186	0.472122	0.697185	36.2897	38.9692	33.6101	0.862479	-0.213438	0.649362	0.817251	NA	NA	0	0	0	0	0	0	0	0	0	0	1
I	5472729	5475847	3119	1	SPNCRNA.1087	c("SPAC1039.11c", "SPNCRNA.276")	230	178	380	554	1.61411	1.53617	2.29162	2.31514	315.603	404.946	226.259	0.558738	-0.839757	2.91313e-06	1.47936e-05	NA	NA	0	0	0	0	0	0	0	0	0	0	1
I	5475433	5475848	416	1	SPNCRNA.30	NULL	5	10	5	4	-1.003	0.288799	-1.04985	-1.89212	6.45085	4.11668	8.78501	2.134	1.09356	0.370179	0.556706	NA	NA	0	0	0	0	0	0	0	0	0	0	1
I	5476698	5478012	1315	1	SPAC922.03	NULL	905	724	1210	1718	4.90839	4.87828	5.28055	5.26591	1088.82	1272.47	905.169	0.711346	-0.491376	0.000132925	0.000519581	NA	NA	0	0	0	0	0	0	0	0	0	0	1
I	5478367	5479836	1470	1	SPNCRNA.1089	SPNCRNA.1088	35	42	68	87	-0.0168182	0.538025	0.894499	0.729618	55.915	67.9939	43.836	0.644706	-0.633288	0.0756505	0.156086	NA	NA	0	0	0	0	0	0	0	0	0	0	1
I	5478402	5479098	697	1	SPNCRNA.277	SPNCRNA.1088	18	28	38	37	0.100408	1.02965	1.13155	0.572714	30.1491	33.7177	26.5806	0.788329	-0.34313	0.529663	0.711878	NA	NA	0	0	0	0	0	0	0	0	0	0	1
I	5479853	5480485	633	1	SPAC922.04	NULL	4821	3947	8769	12692	8.30454	8.30778	9.12076	9.13384	7094.73	9310.68	4878.79	0.523999	-0.932365	2.12412e-18	3.05731e-17	NA	NA	0	0	0	0	0	0	0	0	0	0	1
I	5481585	5482068	484	1	SPNCRNA.278	NULL	12	3	3	2	0.0415979	-1.66656	-2.00521	-3.11047	5.08122	2.32268	7.83975	3.3753	1.75501	0.168913	0.30331	NA	NA	0	0	0	0	0	0	0	0	0	0	1
I	5482662	5482877	216	1	SPAC922.09	NULL	10	6	0	4	0.942533	0.497384	-16.6096	-0.946594	5.10688	1.47325	8.7405	5.93279	2.56871	0.0853201	0.172975	NA	NA	0	0	0	0	0	0	0	0	0	0	1
I	5485096	5486287	1192	1	SPAC922.06	SPAC922.05c	192	189	332	409	2.74128	3.01037	3.4845	3.26506	270.263	326.164	214.362	0.657221	-0.605549	0.00134264	0.00435948	NA	NA	0	0	0	0	0	0	0	0	0	0	1
I	5487525	5488928	1404	1	SPNCRNA.1090	SPAC922.07c	17	10	28	35	-0.992351	-1.46606	-0.319326	-0.517758	21.2134	27.6942	14.7327	0.531979	-0.910559	0.151779	0.278587	NA	NA	0	0	0	0	0	0	0	0	0	0	1
I	5492902	5495156	2255	1	SPAC869.10c	SPNCRNA.1091	610	419	1286	1872	3.48924	3.23919	4.51839	4.53972	967.985	1369.37	566.597	0.413764	-1.27312	4.64977e-21	7.46201e-20	NA	NA	0	0	0	0	0	0	0	0	0	0	1
I	5495270	5496597	1328	1	SPNCRNA.1092	NULL	22	26	60	85	-0.540102	-0.00728674	0.860488	0.842626	45.1648	63.0278	27.3018	0.433171	-1.20699	0.0028172	0.00852259	NA	NA	0	0	0	0	0	0	0	0	0	0	1
I	5496942	5497837	896	1	SPNCRNA.1093	SPAC869.09	2	2	5	6	-3.43171	-3.13993	-2.15673	-2.41405	3.55298	4.85331	2.25264	0.464146	-1.10735	0.548506	0.731098	NA	NA	0	0	0	0	0	0	0	0	0	0	1
I	5499768	5501236	1469	1	SPAC869.07c	NULL	9	12	12	16	-1.97515	-1.26832	-1.60698	-1.71231	12.1331	12.2372	12.0289	0.982978	-0.024769	0.994968	1	NA	NA	0	0	0	0	0	0	0	0	0	0	1
I	5502560	5503291	732	1	SPAC869.06c	NULL	1	1	0	1	-4.13996	-3.84819	-16.6096	-4.70706	0.747318	0.368314	1.12632	3.05805	1.61261	0.921628	0.999568	NA	NA	0	0	0	0	0	0	0	0	0	0	1
I	5504488	5505476	989	1	SPNCRNA.279	NULL	1	0	2	3	-4.574	-16.6096	-3.62102	-3.55643	1.32898	2.16231	0.495642	0.229219	-2.1252	0.634336	0.803903	NA	NA	0	0	0	0	0	0	0	0	0	0	1
I	5505583	5508782	3200	1	SPAC869.05c	NULL	253	155	583	833	1.71463	1.29957	2.87213	2.86658	419.091	615.029	223.153	0.362833	-1.46262	7.67748e-18	1.07539e-16	NA	NA	0	0	0	0	0	0	0	0	0	0	1
I	5512757	5514865	2109	1	SPAC869.03c	NULL	1	4	2	4	-5.66613	-3.3749	-4.71334	-4.23381	2.77449	2.53063	3.01836	1.19273	0.254272	1	1	NA	NA	0	0	0	0	0	0	0	0	0	0	1
I	5516040	5516265	226	1	SPNCRNA.280	NULL	0	0	0	0	-16.6096	-16.6096	-16.6096	-16.6096	0	0	0	NA	NA	NA	NA	NA	NA	0	0	0	0	0	0	0	0	0	0	1
I	5516331	5516951	621	1	SPNCRNA.281	NULL	0	0	0	0	-16.6096	-16.6096	-16.6096	-16.6096	0	0	0	NA	NA	NA	NA	NA	NA	0	0	0	0	0	0	0	0	0	0	1
I	5517028	5517494	467	1	SPNCRNA.282	NULL	3	1	4	8	-1.90678	-3.19985	-1.53861	-1.05898	3.58943	5.06125	2.11761	0.418396	-1.25706	0.491722	0.677811	NA	NA	0	0	0	0	0	0	0	0	0	0	1
I	5517865	5519950	2086	1	SPAC869.02c	NULL	1221	1004	2646	3429	4.60281	4.61232	5.6717	5.52532	1950.12	2661.85	1238.38	0.465234	-1.10397	2.92106e-20	4.54202e-19	NA	NA	0	0	0	0	0	0	0	0	0	0	1
I	5525499	5525873	375	1	SPNCRNA.284	NULL	9	7	53	46	-0.00532268	-0.0760782	2.5058	1.78109	26.9192	44.9628	8.87554	0.197398	-2.34082	0.00073204	0.00249784	NA	NA	0	0	0	0	0	0	0	0	0	0	1
I	5527462	5528959	1498	1	SPAC186.01	NULL	25	25	136	125	-0.52946	-0.23765	1.86727	1.22523	73.0493	117.94	28.1581	0.238748	-2.06644	0.000277001	0.001025	NA	NA	0	0	0	0	0	0	0	0	0	0	1
I	5531267	5531539	273	1	SPNCRNA.96	NULL	0	0	0	0	-16.6096	-16.6096	-16.6096	-16.6096	0	0	0	NA	NA	NA	NA	NA	NA	0	0	0	0	0	0	0	0	0	0	1
I	5535061	5536432	1372	1	SPAC186.03	NULL	0	0	0	1	-16.6096	-16.6096	-16.6096	-5.61309	0.184157	0.368314	0	0	#NAME?	1	1	NA	NA	0	0	0	0	0	0	0	0	0	0	1
I	5542290	5543031	742	1	SPAC186.06	NULL	124	113	38	63	2.79441	2.9522	1.04129	1.25028	88.0102	43.2938	132.726	3.06572	1.61622	2.01429e-07	1.20596e-06	NA	NA	0	0	0	0	0	0	0	0	0	0	1
I	5543364	5543438	75	1	SPNCRNA.310	NULL	0	0	0	0	-16.6096	-16.6096	-16.6096	-16.6096	0	0	0	NA	NA	NA	NA	NA	NA	0	0	0	0	0	0	0	0	0	0	1
I	5546205	5546648	444	1	SPNCRNA.61	SPAC186.07c	3	0	2	3	-1.83392	-16.6096	-2.46571	-2.40111	1.82462	2.16231	1.48693	0.687656	-0.540242	1	1	NA	NA	0	0	0	0	0	0	0	0	0	0	1
I	5552811	5554529	1719	1	SPAC186.09	NULL	30	14	27	27	-0.464959	-1.27267	-0.663815	-1.18417	23.9589	24.219	23.6988	0.978521	-0.0313249	0.957484	1	NA	NA	0	0	0	0	0	0	0	0	0	0	1
I	5555716	5556768	1053	1	SPAC750.01	NULL	165	137	173	160	2.70152	2.72504	2.72297	2.08991	159.288	150.393	168.184	1.1183	0.161306	0.505081	0.688674	NA	NA	0	0	0	0	0	0	0	0	0	0	1
I	1	5662	5662	-1	SPAC212.11	NULL	0	0	0	0	-16.6096	-16.6096	-16.6096	-16.6096	0	0	0	NA	NA	NA	NA	NA	NA	0	0	0	0	0	0	0	0	0	0	1
I	5726	6331	606	-1	SPAC212.10	NULL	0	0	0	0	-16.6096	-16.6096	-16.6096	-16.6096	0	0	0	NA	NA	NA	NA	NA	NA	0	0	0	0	0	0	0	0	0	0	1
I	11027	11556	530	-1	SPNCRNA.70	NULL	0	0	0	0	-16.6096	-16.6096	-16.6096	-16.6096	0	0	0	NA	NA	NA	NA	NA	NA	0	0	0	0	0	0	0	0	0	0	1
I	23589	24054	466	-1	SPAC212.03	NULL	0	0	0	0	-16.6096	-16.6096	-16.6096	-16.6096	0	0	0	NA	NA	NA	NA	NA	NA	0	0	0	0	0	0	0	0	0	0	1
I	27353	27763	411	-1	SPAC212.02	NULL	0	0	0	1	-16.6096	-16.6096	-16.6096	-3.87452	0.184157	0.368314	0	0	#NAME?	1	1	NA	NA	0	0	0	0	0	0	0	0	0	0	1
I	31140	32345	1206	-1	SPAC977.18	SPAC977.02	12	14	2	0	-0.584496	-0.0702959	-3.2162	-16.6096	7.9173	1.05737	14.7772	13.9754	3.80482	0.00130015	0.00423183	NA	NA	0	0	0	0	0	0	0	0	0	0	1
I	35768	36382	615	-1	SPAC977.05c	NULL	0	0	0	0	-16.6096	-16.6096	-16.6096	-16.6096	0	0	0	NA	NA	NA	NA	NA	NA	0	0	0	0	0	0	0	0	0	0	1
I	40916	41770	855	-1	SPNCRNA.601	SPNCRNA.136	0	0	0	0	-16.6096	-16.6096	-16.6096	-16.6096	0	0	0	NA	NA	NA	NA	NA	NA	0	0	0	0	0	0	0	0	0	0	1
I	42057	43307	1251	-1	SPAC977.07c	NULL	0	0	0	0	-16.6096	-16.6096	-16.6096	-16.6096	0	0	0	NA	NA	NA	NA	NA	NA	0	0	0	0	0	0	0	0	0	0	1
I	45875	48399	2525	-1	SPAC977.09c	NULL	0	0	0	0	-16.6096	-16.6096	-16.6096	-16.6096	0	0	0	NA	NA	NA	NA	NA	NA	0	0	0	0	0	0	0	0	0	0	1
I	50851	51545	695	-1	SPNCRNA.602	c("SPAC977.10", "SPNCRNA.19")	16	17	15	26	-0.0653695	0.313904	-0.205333	0.0678503	18.0791	17.5064	18.6518	1.06543	0.0914323	0.998573	1	NA	NA	0	0	0	0	0	0	0	0	0	0	1
I	58277	59105	829	-1	SPAC977.13c	NULL	113	104	72	120	2.50044	2.67251	1.80333	2.01993	101.931	82.263	121.598	1.47817	0.563808	0.0566062	0.122256	NA	NA	0	0	0	0	0	0	0	0	0	0	1
I	59614	60907	1294	-1	SPAC977.14c	NULL	3297	1944	5390	7190	6.7248	6.25449	7.38708	7.28242	4178.98	5497.79	2860.17	0.520241	-0.942749	1.83139e-08	1.25479e-07	NA	NA	0	0	0	0	0	0	0	0	0	0	1
I	64559	66980	2422	-1	SPAC977.16c	SPAC977.17	287	222	893	1198	2.29901	2.22033	3.88976	3.79329	597.808	913.356	282.26	0.309036	-1.69415	2.85742e-28	5.55024e-27	NA	NA	0	0	0	0	0	0	0	0	0	0	1
I	71982	72380	399	-1	SPNCRNA.37	SPNCRNA.83	0	0	0	0	-16.6096	-16.6096	-16.6096	-16.6096	0	0	0	NA	NA	NA	NA	NA	NA	0	0	0	0	0	0	0	0	0	0	1
I	74452	76721	2270	-1	SPAPJ695.02	NULL	112	65	23	37	1.03437	0.5412	-1.29625	-1.13073	61.1468	25.7874	96.5061	3.74238	1.90396	2.1742e-07	1.29717e-06	NA	NA	0	0	0	0	0	0	0	0	0	0	1
I	77480	78066	587	-1	SPAPJ695.01c	NULL	1	0	0	1	-3.82153	-16.6096	-16.6096	-4.38865	0.431978	0.368314	0.495642	1.34571	0.428364	1	1	NA	NA	0	0	0	0	0	0	0	0	0	0	1
I	81468	82345	878	-1	SPNCRNA.603	NULL	0	2	3	6	-16.6096	-3.11065	-2.86438	-2.38477	2.52865	3.79594	1.26136	0.332292	-1.58948	0.430023	0.617611	NA	NA	0	0	0	0	0	0	0	0	0	0	1
I	85566	86324	759	-1	SPAC1F8.02c	NULL	10	10	4	17	-0.870517	-0.578708	-2.23926	-0.672204	9.81965	8.37607	11.2632	1.34469	0.427274	0.791233	0.91865	NA	NA	0	0	0	0	0	0	0	0	0	0	1
I	88201	90300	2100	-1	SPAC1F8.03c	NULL	799	419	223	1802	3.98136	3.34193	2.09336	4.58748	720.936	781.598	660.273	0.844773	-0.243364	0.769037	0.903815	NA	NA	0	0	0	0	0	0	0	0	0	0	1
I	90681	91753	1073	-1	SPNCRNA.604	c("SPNCRNA.139", "SPNCRNA.605")	39	30	48	106	0.593462	0.506765	0.846165	1.46876	51.3343	64.4182	38.2505	0.593784	-0.751991	0.047414	0.104972	NA	NA	0	0	0	0	0	0	0	0	0	0	1
I	92387	93931	1545	-1	SPAC1F8.04c	SPNCRNA.605	80	50	73	134	1.10403	0.717772	0.92507	1.28097	79.5667	87.9481	71.1854	0.809402	-0.305071	0.322148	0.502607	NA	NA	0	0	0	0	0	0	0	0	0	0	1
I	95159	96525	1367	-1	SPNCRNA.606	SPAC1F8.05	131	87	49	88	1.99211	1.69345	0.526551	0.850908	89.0577	58.3172	119.798	2.05425	1.03861	0.000525691	0.00184623	NA	NA	0	0	0	0	0	0	0	0	0	0	1
I	99046	101140	2095	-1	SPNCRNA.607	SPAC1F8.06	223	173	110	162	2.14365	2.0692	1.07726	1.11539	168.729	117.822	219.636	1.86413	0.898502	7.04191e-05	0.000288404	NA	NA	0	0	0	0	0	0	0	0	0	0	1
I	101715	103594	1880	-1	SPAC1F8.07c	NULL	231378	198203	287883	395802	12.3204	12.3889	12.5888	12.5277	268831	297979	239683	0.804364	-0.31408	0.00182343	0.00572848	NA	NA	0	0	0	0	0	0	0	0	0	0	1
I	108732	109195	464	-1	SPAC11D3.01c	NULL	485	476	222	312	5.43934	5.70414	4.26506	4.23569	386.436	232.282	540.59	2.3273	1.21866	2.33177e-07	1.38362e-06	NA	NA	0	0	0	0	0	0	0	0	0	0	1
I	109829	110455	627	-1	SPAC11D3.02c	SPNCRNA.608	2389	2520	3602	5102	7.30535	7.67418	7.85089	7.83279	3278.43	3783.46	2773.4	0.733033	-0.448049	0.00931468	0.0250254	NA	NA	0	0	0	0	0	0	0	0	0	0	1
I	110904	112499	1596	-1	SPAC11D3.03c	SPNCRNA.608	55	59	40	41	0.605146	0.99824	0.098862	-0.385871	50.3594	36.2483	64.4705	1.77858	0.830725	0.0301515	0.0707603	NA	NA	0	0	0	0	0	0	0	0	0	0	1
I	112514	114445	1932	-1	SPAC11D3.04c	SPAC11D3.05	718	629	1229	1979	3.99837	4.09926	4.72694	4.89386	1065.61	1378.65	752.569	0.545875	-0.873358	5.77152e-12	5.59229e-11	NA	NA	0	0	0	0	0	0	0	0	0	0	1
I	116054	120309	4256	-1	SPAC11D3.07c	SPAC11D3.06	1768	1262	1923	2538	4.10811	3.91351	4.18249	4.06246	1811.83	1951.44	1672.21	0.856912	-0.222782	0.0851398	0.172667	NA	NA	0	0	0	0	0	0	0	0	0	0	1
I	120321	123785	3465	-1	SPAC11D3.08c	SPAC11D3.09	626	566	996	1425	2.90687	3.05332	3.52999	3.52637	859.327	1051.42	667.237	0.634607	-0.656065	7.77776e-07	4.28866e-06	NA	NA	0	0	0	0	0	0	0	0	0	0	1
I	126951	129316	2366	-1	SPAC11D3.11c	SPAC11D3.10	660	493	868	1126	3.58762	3.45856	3.936	3.79107	755.835	873.62	638.049	0.730351	-0.453339	0.00164855	0.00524218	NA	NA	0	0	0	0	0	0	0	0	0	0	1
I	131190	135736	4547	-1	SPAC11D3.14c	c("SPAC11D3.13", "SPNCRNA.609", "SPNCRNA.147")	582	510	1253	1599	2.40966	2.51096	3.4691	3.30052	930.744	1251.38	610.111	0.487552	-1.03637	1.39533e-14	1.6357e-13	NA	NA	0	0	0	0	0	0	0	0	0	0	1
I	136274	137355	1082	-1	SPNCRNA.610	SPAC11D3.15	95	108	77	100	1.86586	2.3427	1.51594	1.37264	96.3698	77.5402	115.199	1.48568	0.571119	0.0990124	0.196065	NA	NA	0	0	0	0	0	0	0	0	0	0	1
I	140381	141653	1273	-1	SPAC11D3.16c	SPAC11D3.17	582	425	464	730	4.24634	4.0846	3.87259	4.006	535.341	514.179	556.503	1.08231	0.114118	0.467549	0.655968	NA	NA	0	0	0	0	0	0	0	0	0	0	1
I	144819	146935	2117	-1	SPAC11D3.18c	SPNCRNA.611	344	288	212	481	2.78286	2.81833	2.03766	2.69927	320.689	289.24	352.137	1.21745	0.283868	0.458032	0.645104	NA	NA	0	0	0	0	0	0	0	0	0	0	1
I	146871	148041	1171	-1	SPNCRNA.612	SPAC5H10.01	60	79	57	81	1.08886	1.77756	0.968001	0.954598	69.7654	59.9685	79.5623	1.32673	0.40788	0.411643	0.599389	NA	NA	0	0	0	0	0	0	0	0	0	0	1
I	148038	150331	2294	-1	SPAC5H10.02c	c("SPAC5H10.01", "SPNCRNA.613", "SPAC5H10.03", "SPRRNA.10")	44	51	32	49	-0.328715	0.176087	-0.834995	-0.74065	44.4691	34.9653	53.9729	1.54361	0.626312	0.159189	0.2894	NA	NA	0	0	0	0	0	0	0	0	0	0	1
I	153070	155583	2514	-1	SPAC5H10.05c	SPAC5H10.04	916	665	819	1219	3.91892	3.74874	3.71058	3.76398	877.689	881.968	873.411	0.990298	-0.014066	0.941624	1	NA	NA	0	0	0	0	0	0	0	0	0	0	1
I	156430	158279	1850	-1	SPAC5H10.06c	NULL	4575	3846	3115	4463	6.68173	6.72313	6.08034	6.07875	3991.9	3290.64	4693.16	1.42621	0.512191	4.18556e-06	2.07875e-05	NA	NA	0	0	0	0	0	0	0	0	0	0	1
I	159880	160945	1066	-1	SPAC5H10.08c	NULL	1579	1233	2235	3017	5.94229	5.87726	6.3967	6.30917	1926.53	2292.81	1560.25	0.680494	-0.555345	3.34787e-06	1.68715e-05	NA	NA	0	0	0	0	0	0	0	0	0	0	1
I	160977	161822	846	-1	SPAC5H10.09c	SPNCRNA.614	502	453	778	1150	4.62251	4.76615	5.20774	5.25117	684.694	834.878	534.511	0.640226	-0.643347	3.74268e-06	1.87431e-05	NA	NA	0	0	0	0	0	0	0	0	0	0	1
I	162257	164455	2199	-1	SPNCRNA.615	c("SPNCRNA.614", "SPAC5H10.10")	107	90	126	117	1.01433	1.05653	1.20328	0.576009	109.751	109.707	109.795	1.0008	0.00115481	0.904255	0.991024	NA	NA	0	0	0	0	0	0	0	0	0	0	1
I	165814	167826	2013	-1	SPAC5H10.12c	c("SPAC5H10.11", "SPNCRNA.616")	1073	796	1360	2034	4.46779	4.32879	4.76289	4.82324	1251	1468.16	1033.85	0.704177	-0.505991	5.74533e-05	0.000238805	NA	NA	0	0	0	0	0	0	0	0	0	0	1
I	167766	170137	2372	-1	SPAC5H10.13c	NULL	2057	1549	2988	4231	5.16992	5.05253	5.66171	5.64316	2567.25	3138.05	1996.46	0.636211	-0.652423	1.49223e-08	1.03722e-07	NA	NA	0	0	0	0	0	0	0	0	0	0	1
I	170489	174701	4213	-1	SPAC13G6.01c	c("SPNCRNA.617", "SPSNORNA.49")	3750	3112	5107	6681	5.20753	5.23029	5.60626	5.47348	4491.02	5160.7	3821.34	0.740468	-0.43349	8.40061e-05	0.00033977	NA	NA	0	0	0	0	0	0	0	0	0	0	1
I	174865	176655	1791	-1	SPAC13G6.02c	c("SPAC13G6.03", "SPNCRNA.141")	20522	16092	28758	40074	8.89382	8.8348	9.33375	9.2921	25142.1	29963.7	20320.5	0.678169	-0.560284	6.92749e-08	4.42563e-07	NA	NA	0	0	0	0	0	0	0	0	0	0	1
I	176878	177943	1066	-1	SPNCRNA.618	SPAC13G6.03	31	34	31	52	0.271701	0.696778	0.224846	0.450725	36.1748	35.5416	36.808	1.03563	0.0505137	1	1	NA	NA	0	0	0	0	0	0	0	0	0	0	1
I	180903	182254	1352	-1	SPAC13G6.05c	SPAC13G6.04	689	628	782	967	4.84384	5.00192	4.97965	4.76564	753.578	769.591	737.565	0.958385	-0.0613232	0.708541	0.862225	NA	NA	0	0	0	0	0	0	0	0	0	0	1
I	182337	186358	4022	-1	SPAC13G6.06c	NULL	4974	3965	7602	11199	5.68198	5.64671	6.24709	6.28565	6554.89	8143.81	4965.97	0.609785	-0.713628	2.0383e-11	1.87062e-10	NA	NA	0	0	0	0	0	0	0	0	0	0	1
I	186314	187683	1370	-1	SPAC13G6.07c	NULL	25667	20540	37547	54148	9.60315	9.57349	10.1051	10.1129	32734.9	39794	25675.8	0.645218	-0.632141	7.40712e-10	5.91584e-09	NA	NA	0	0	0	0	0	0	0	0	0	0	1
I	188450	190474	2025	-1	SPNCRNA.619	c("SPAC13G6.08", "SPAC13G6.09")	605	439	744	1022	3.63257	3.46167	3.88408	3.82174	673.245	769.759	576.732	0.749238	-0.416505	0.00464313	0.0134272	NA	NA	0	0	0	0	0	0	0	0	0	0	1
I	191928	194053	2126	-1	SPAC13G6.10c	SPAC13G6.09	20980	16986	31049	42925	8.67829	8.66543	9.19696	9.14387	26668.2	32225	21111.3	0.655122	-0.610165	3.66789e-09	2.72966e-08	NA	NA	0	0	0	0	0	0	0	0	0	0	1
I	194099	195626	1528	-1	SPAC13G6.11c	NULL	1909	1375	2123	3056	5.95329	5.77171	6.05972	6.06489	2030.67	2247.97	1813.37	0.80667	-0.30995	0.00976445	0.0261576	NA	NA	0	0	0	0	0	0	0	0	0	0	1
I	195940	199051	3112	-1	SPAC13G6.12c	SPAC13G6.13	652	538	512	583	3.14207	3.15662	2.74649	2.41348	573.939	485.414	662.465	1.36474	0.448628	0.00162988	0.00519244	NA	NA	0	0	0	0	0	0	0	0	0	0	1
I	199874	200587	714	-1	SPNCRNA.620	SPAC13G6.14	4	9	3	3	-2.10423	-0.642534	-2.5661	-3.08643	5.17484	2.691	7.65869	2.84604	1.50896	0.286221	0.459332	NA	NA	0	0	0	0	0	0	0	0	0	0	1
I	201729	203346	1618	-1	SPAC13G6.15c	NULL	1204	964	1151	1600	4.94911	4.92019	4.83731	4.79213	1201.27	1197.82	1204.73	1.00577	0.00829869	0.939547	1	NA	NA	0	0	0	0	0	0	0	0	0	0	1
I	203597	204322	726	-1	SPNCRNA.621	NULL	209	161	139	194	3.57902	3.49439	2.94375	2.90436	175.034	144.94	205.129	1.41527	0.501072	0.0222368	0.0543425	NA	NA	0	0	0	0	0	0	0	0	0	0	1
I	206476	208044	1569	-1	SPAC24B11.06c	SPNCRNA.622	3663	2846	3865	5849	6.59867	6.52639	6.62925	6.70661	3904.04	4197.64	3610.45	0.860116	-0.217397	0.0430822	0.0963948	NA	NA	0	0	0	0	0	0	0	0	0	0	1
I	208839	211275	2437	-1	SPAC24B11.07c	SPNCRNA.622	1587	1044	2166	2877	4.75668	4.44431	5.15856	5.04773	1824.89	2204.77	1445.01	0.655403	-0.609545	2.7296e-06	1.39253e-05	NA	NA	0	0	0	0	0	0	0	0	0	0	1
I	211714	213591	1878	-1	SPAC24B11.08c	NULL	1521	1257	1845	2654	5.07131	5.08809	5.30305	5.30724	1749.78	1952.93	1546.64	0.791957	-0.336505	0.00414382	0.0121323	NA	NA	0	0	0	0	0	0	0	0	0	0	1
I	213527	215928	2402	-1	SPNCRNA.623	c("SPNCRNA.142", "SPAC24B11.09")	315	293	493	669	2.44467	2.63204	3.04405	2.96411	423.98	507.044	340.917	0.672361	-0.572692	0.00034201	0.0012456	NA	NA	0	0	0	0	0	0	0	0	0	0	1
I	218260	221562	3303	-1	SPAC24B11.10c	NULL	2509	1998	3825	5196	4.97882	4.94208	5.54031	5.46189	3219.82	3935.98	2503.67	0.636097	-0.652681	7.01742e-09	5.08985e-08	NA	NA	0	0	0	0	0	0	0	0	0	0	1
I	221694	223991	2298	-1	SPAC24B11.11c	NULL	2229	1681	2300	3592	5.3315	5.21624	5.32988	5.45267	2351.96	2538.96	2164.96	0.852696	-0.229897	0.0404878	0.0913391	NA	NA	0	0	0	0	0	0	0	0	0	0	1
I	224080	229307	5228	-1	SPAC24B11.12c	NULL	5868	4501	7673	11263	5.56406	5.47325	5.90413	5.93749	6976.02	8204.92	5747.12	0.700448	-0.51365	1.41501e-06	7.5125e-06	NA	NA	0	0	0	0	0	0	0	0	0	0	1
I	229270	230855	1586	-1	SPNCRNA.624	SPAC24B11.14	268	191	312	393	2.8104	2.61355	2.98286	2.79548	281.495	309.697	253.292	0.81787	-0.290057	0.152931	0.280386	NA	NA	0	0	0	0	0	0	0	0	0	0	1
I	233032	235164	2133	-1	SPAC806.02c	SPAC24B11.13	1586	1318	2725	3777	4.98152	5.00629	5.71553	5.66615	2224.56	2831.79	1617.33	0.571132	-0.808104	3.43724e-12	3.39594e-11	NA	NA	0	0	0	0	0	0	0	0	0	0	1
I	235533	236104	572	-1	SPAC806.03c	SPNCRNA.625	6308	5062	10567	15758	8.83858	8.81292	9.53604	9.59219	8854.76	11390.5	6319.01	0.554761	-0.850061	6.79413e-16	8.69474e-15	NA	NA	0	0	0	0	0	0	0	0	0	0	1
I	237023	237885	863	-1	SPAC806.11	SPNCRNA.625	6799	4998	9684	10253	8.35337	8.20122	8.8168	8.37881	7709.06	8896.11	6522.01	0.733131	-0.447858	0.117282	0.225329	NA	NA	0	0	0	0	0	0	0	0	0	0	1
I	237074	237848	775	-1	SPNCRNA.03	SPNCRNA.625	6582	4852	9339	9873	8.46174	8.31361	8.91963	8.47949	7448.07	8573.76	6322.38	0.73741	-0.43946	0.125426	0.238041	NA	NA	0	0	0	0	0	0	0	0	0	0	1
I	237820	239427	1608	-1	SPNCRNA.626	c("SPNCRNA.627", "SPNCRNA.144", "SPNCRNA.628")	1017	752	1349	1559	4.71454	4.57084	5.07525	4.76362	1132.87	1287.4	978.34	0.759936	-0.396051	0.0479557	0.105976	NA	NA	0	0	0	0	0	0	0	0	0	0	1
I	241008	243122	2115	-1	SPAC806.04c	NULL	1088	972	1597	2578	4.55907	4.68823	5.0659	5.23642	1473.05	1793.82	1152.28	0.64236	-0.638547	2.61388e-07	1.53583e-06	NA	NA	0	0	0	0	0	0	0	0	0	0	1
I	244206	247074	2869	-1	SPAC806.06c	SPAC806.05	1439	1098	1801	2645	4.38	4.28163	4.65688	4.69099	1666.03	1926.35	1405.72	0.729729	-0.454566	0.000153797	0.000594011	NA	NA	0	0	0	0	0	0	0	0	0	0	1
I	247720	248448	729	-1	SPNCRNA.629	SPAC806.07	40	26	35	28	1.18764	0.857971	0.948144	0.105859	32.5201	28.8168	36.2234	1.25702	0.330012	0.395813	0.582984	NA	NA	0	0	0	0	0	0	0	0	0	0	1
I	248579	250983	2405	-1	SPAC806.08c	NULL	868	634	947	1331	3.93982	3.77842	4.01863	3.98935	910.48	990.891	830.069	0.8377	-0.255495	0.0645693	0.136556	NA	NA	0	0	0	0	0	0	0	0	0	0	1
I	251173	254600	3428	-1	SPAC1639.01c	SPNCRNA.630	5765	4432	4893	6688	6.55968	6.47213	6.27622	6.20672	5351.35	5050.14	5652.55	1.11929	0.162579	0.113916	0.220272	NA	NA	0	0	0	0	0	0	0	0	0	0	1
I	255881	259505	3625	-1	SPAC1639.02c	c("SPNCRNA.630", "SPNCRNA.631")	2117	1722	2931	4242	4.94604	4.93992	5.36855	5.38154	2623.63	3111.96	2135.31	0.68616	-0.543383	1.51211e-06	7.99621e-06	NA	NA	0	0	0	0	0	0	0	0	0	0	1
I	266551	267792	1242	-1	SPNCRNA.632	SPAC1F5.11c	12	7	10	19	-1.31797	-1.80375	-1.62785	-1.22222	11.3236	12.2848	10.3625	0.843518	-0.245509	0.810242	0.932069	NA	NA	0	0	0	0	0	0	0	0	0	0	1
I	270893	272610	1718	-1	SPAC1F5.10	c("SPAC1F5.11c", "SPNCRNA.633")	1673	1462	2305	3179	5.44075	5.53807	5.85623	5.79967	2070.38	2389.49	1751.26	0.732903	-0.448306	0.000100505	0.000400921	NA	NA	0	0	0	0	0	0	0	0	0	0	1
I	272539	274901	2363	-1	SPNCRNA.634	SPAC1F5.09c	818	600	703	1282	3.84504	3.68971	3.57961	3.92604	813.844	843.844	783.843	0.928896	-0.106411	0.504245	0.688462	NA	NA	0	0	0	0	0	0	0	0	0	0	1
I	276657	281347	4691	-1	SPAC1F5.06	c("SPAC1F5.08c", "SPAC1F5.07c")	12757	10189	13758	19525	6.81881	6.78634	6.88093	6.86562	13606.9	14465	12748.9	0.881364	-0.182191	0.079622	0.163019	NA	NA	0	0	0	0	0	0	0	0	0	0	1
I	291979	293771	1793	-1	SPAC1F5.02	NULL	16551	13353	14937	21217	8.58196	8.56402	8.38707	8.37304	16168.2	15711.5	16624.8	1.05813	0.0815213	0.440046	0.626386	NA	NA	0	0	0	0	0	0	0	0	0	0	1
I	294591	299154	4564	-1	SPAC18B11.11	NULL	1589	1151	2157	3094	3.85331	3.67989	4.24736	4.24744	1896.71	2279.94	1513.49	0.663829	-0.591117	7.91332e-07	4.35142e-06	NA	NA	0	0	0	0	0	0	0	0	0	0	1
I	299278	301837	2560	-1	SPAC18B11.10	c("SPNCRNA.27", "SPNCRNA.635")	2342	1771	2560	3799	5.38848	5.27712	5.47003	5.51914	2515.19	2752.66	2277.73	0.827465	-0.27323	0.0166095	0.0420724	NA	NA	0	0	0	0	0	0	0	0	0	0	1
I	306764	308031	1268	-1	SPAC18B11.06	NULL	1433	1151	2352	3406	5.55197	5.52763	6.21996	6.23379	1967.06	2497.94	1436.17	0.57494	-0.798517	1.11222e-11	1.0455e-10	NA	NA	0	0	0	0	0	0	0	0	0	0	1
I	308138	310034	1897	-1	SPAC18B11.05	NULL	1045	801	1052	1449	4.57743	4.48561	4.54021	4.48177	1056.49	1089.86	1023.12	0.93876	-0.0911711	0.517324	0.698926	NA	NA	0	0	0	0	0	0	0	0	0	0	1
I	310157	311712	1556	-1	SPAC18B11.04	NULL	1240	1078	780	1219	5.24966	5.33949	4.53401	4.6578	1077.91	861.349	1294.47	1.50284	0.587691	1.05507e-05	4.90894e-05	NA	NA	0	0	0	0	0	0	0	0	0	0	1
I	312215	316276	4062	-1	SPNCRNA.636	c("SPAC18B11.03c", "SPAC18B11.02c", "SPAC12G12.16c")	421	312	468	639	2.10519	1.96473	2.21102	2.13997	444.107	482.777	405.438	0.839803	-0.251878	0.132706	0.249141	NA	NA	0	0	0	0	0	0	0	0	0	0	1
I	316996	319185	2190	-1	SPAC12G12.15	c("SPAC12G12.16c", "SPNCRNA.637")	1943	1470	1912	2667	5.26476	5.1541	5.1947	5.15447	1941.64	1993.14	1890.13	0.948319	-0.0765551	0.554518	0.736412	NA	NA	0	0	0	0	0	0	0	0	0	0	1
I	321796	322578	783	-1	SPNCRNA.638	c("SPAC12G12.14c", "SPAC12G12.13c")	22	16	4	4	0.22206	0.0544439	-2.28417	-2.8045	12.2915	3.588	20.995	5.85146	2.5488	0.00236811	0.00727772	NA	NA	0	0	0	0	0	0	0	0	0	0	1
I	324042	325517	1476	-1	SPAC12G12.12	SPAC12G12.13c	880	719	897	1248	4.74322	4.74352	4.72397	4.68004	911.755	933.886	889.624	0.952604	-0.0700511	0.60048	0.773076	NA	NA	0	0	0	0	0	0	0	0	0	0	1
I	328196	329545	1350	-1	SPAC12G12.10	NULL	377	368	797	1055	3.53516	3.79212	4.56832	4.45255	614.44	809.933	418.947	0.517262	-0.951034	7.23106e-11	6.25372e-10	NA	NA	0	0	0	0	0	0	0	0	0	0	1
I	329810	332816	3007	-1	SPAC12G12.09	NULL	1185	800	1552	2369	4.03205	3.75705	4.37443	4.46422	1392.47	1693.06	1091.88	0.644917	-0.632814	4.14833e-07	2.37352e-06	NA	NA	0	0	0	0	0	0	0	0	0	0	1
I	333178	334621	1444	-1	SPAC12G12.08	c("SPAC12G12.17", "SPAC12G12.07c")	965	764	1233	1715	4.79402	4.74887	5.10073	5.0564	1121.83	1283.53	960.134	0.748044	-0.418806	0.00114655	0.0037656	NA	NA	0	0	0	0	0	0	0	0	0	0	1
I	339548	339642	95	-1	SPSNORNA.29	SPAC12G12.05c	6198	6798	4832	8171	11.4032	11.8283	10.9972	11.2347	6461.73	5564.1	7359.35	1.32265	0.403431	0.235693	0.39592	NA	NA	0	0	0	0	0	0	0	0	0	0	1
I	339766	342080	2315	-1	SPAC12G12.04	SPNCRNA.639	29003	24074	30942	52819	9.0226	9.04569	9.06911	9.32024	32685.3	35812.5	29558.1	0.825356	-0.276911	0.0365539	0.083389	NA	NA	0	0	0	0	0	0	0	0	0	0	1
I	342090	345182	3093	-1	SPAC12G12.03	NULL	4769	3148	6175	8642	6.00016	5.69273	6.32606	6.29062	5398.35	6447.6	4349.1	0.67453	-0.568046	3.64299e-07	2.10141e-06	NA	NA	0	0	0	0	0	0	0	0	0	0	1
I	345234	347735	2502	-1	SPAC12G12.02	c("SPNCRNA.640", "SPAC12G12.01c")	2292	1726	3506	4755	5.38686	5.2695	5.95322	5.87248	2914.73	3604.9	2224.57	0.617095	-0.696437	1.2297e-09	9.61026e-09	NA	NA	0	0	0	0	0	0	0	0	0	0	1
I	350239	353340	3102	-1	SPAC630.04c	SPAC630.03	621	519	537	699	3.05495	3.08791	2.79843	2.65843	588.236	541.355	635.117	1.1732	0.230446	0.110211	0.214247	NA	NA	0	0	0	0	0	0	0	0	0	0	1
I	353705	357205	3501	-1	SPAC630.06c	SPAC630.05	677	595	620	831	3.08894	3.19448	2.91519	2.81741	672.329	633.854	710.804	1.1214	0.165303	0.255952	0.421576	NA	NA	0	0	0	0	0	0	0	0	0	0	1
I	357325	359228	1904	-1	SPAC630.07c	SPNCRNA.641	526	409	424	549	3.51959	3.44844	3.16173	3.01411	472.511	426.367	518.656	1.21645	0.282683	0.0592687	0.127206	NA	NA	0	0	0	0	0	0	0	0	0	0	1
I	359638	361266	1629	-1	SPAC630.08c	NULL	5964	3879	9049	13886	7.24778	6.919	7.8024	7.89984	7650.45	9898.48	5402.42	0.545783	-0.873602	2.05311e-13	2.23238e-12	NA	NA	0	0	0	0	0	0	0	0	0	0	1
I	361498	362202	705	-1	SPNCRNA.642	SPAC630.15	37	33	59	77	1.12347	1.25022	1.7498	1.61358	49.3519	59.5526	39.1512	0.657422	-0.605108	0.124148	0.236186	NA	NA	0	0	0	0	0	0	0	0	0	0	1
I	362248	363714	1467	-1	SPAC630.09c	SPAC630.15	1845	1486	1946	2721	5.70624	5.68586	5.73627	5.69953	1941.33	2031	1851.65	0.911692	-0.133381	0.258747	0.425367	NA	NA	0	0	0	0	0	0	0	0	0	0	1
I	369791	374217	4427	-1	SPAC630.13c	SPAC630.12	2967	2188	3304	5265	4.79816	4.65058	4.90651	5.05837	3268.22	3685.95	2850.5	0.773342	-0.370822	0.000731483	0.00249665	NA	NA	0	0	0	0	0	0	0	0	0	0	1
I	374316	377908	3593	-1	SPAC630.14c	NULL	4298	3264	5476	7565	5.95709	5.85188	6.2597	6.20555	4935.09	5681.38	4188.81	0.737288	-0.4397	6.6006e-05	0.000272	NA	NA	0	0	0	0	0	0	0	0	0	0	1
I	377844	384751	6908	-1	SPAC1751.01c	SPAC1751.04	351	248	281	408	1.07677	0.86745	0.709011	0.726648	314.606	298.833	330.379	1.10557	0.144785	0.392079	0.578836	NA	NA	0	0	0	0	0	0	0	0	0	0	1
I	384886	386195	1310	-1	SPAC1751.02c	SPAC1751.04	1427	1079	1641	2120	5.62905	5.51757	5.78378	5.63291	1518.09	1648.4	1387.79	0.841899	-0.24828	0.0555894	0.120385	NA	NA	0	0	0	0	0	0	0	0	0	0	1
I	388352	389177	826	-1	SPNCRNA.643	SPAC31A2.02	26	24	6	11	0.385937	0.562273	-1.77636	-1.42226	17.6233	7.22356	28.023	3.87939	1.95583	0.00482184	0.0138505	NA	NA	0	0	0	0	0	0	0	0	0	0	1
I	390407	391260	854	-1	SPAC31A2.04c	SPAC31A2.03	1938	1526	1527	2361	6.55775	6.50475	6.16702	6.27536	1799.93	1676.89	1922.97	1.14675	0.197549	0.111341	0.215989	NA	NA	0	0	0	0	0	0	0	0	0	0	1
I	391628	396999	5372	-1	SPAC31A2.05c	NULL	1831	1337	2230	3075	3.90215	3.74033	4.13971	4.08289	2031.14	2311.53	1750.74	0.757393	-0.400885	0.000866062	0.00290884	NA	NA	0	0	0	0	0	0	0	0	0	0	1
I	399462	402266	2805	-1	SPAC31A2.07c	SPAC31A2.06	2365	2039	3733	5367	5.1817	5.25953	5.79334	5.79675	3204.24	3950.32	2458.15	0.622266	-0.684397	5.99446e-10	4.82612e-09	NA	NA	0	0	0	0	0	0	0	0	0	0	1
I	402719	405389	2671	-1	SPAC31A2.09c	SPAC31A2.08	1684	1323	1753	2375	4.7628	4.70654	4.77388	4.69162	1735.29	1801.53	1669.05	0.926463	-0.110195	0.385601	0.573079	NA	NA	0	0	0	0	0	0	0	0	0	0	1
I	407714	409872	2159	-1	SPAC31A2.11c	NULL	841	685	1274	1564	4.0153	4.01111	4.56763	4.34314	1049.22	1249.59	848.851	0.679305	-0.557869	8.98565e-05	0.000361595	NA	NA	0	0	0	0	0	0	0	0	0	0	1
I	414245	414930	686	-1	SPAC31A2.13c	SPAC31A2.12	414	318	471	648	4.76519	4.6764	4.90443	4.84434	446.715	487.678	405.752	0.832008	-0.265331	0.105786	0.206883	NA	NA	0	0	0	0	0	0	0	0	0	0	1
I	417823	419996	2174	-1	SPAC31A2.15c	c("SPAC31A2.14", "SPAC31A2.16")	630	455	707	1063	3.71614	3.53847	3.83564	3.90364	682.256	765.298	599.214	0.782981	-0.35295	0.0137677	0.0355032	NA	NA	0	0	0	0	0	0	0	0	0	0	1
I	423926	425256	1331	-1	SPAC13C5.01c	SPAC31A2.16	4339	3814	3876	6107	7.08034	7.18609	6.87069	7.00622	4427.24	4298.48	4556.01	1.05991	0.0839441	0.566762	0.748121	NA	NA	0	0	0	0	0	0	0	0	0	0	1
I	429030	430050	1021	-1	SPNCRNA.644	SPAC13C5.03	30	30	42	53	0.28662	0.578432	0.725188	0.540429	37.7575	41.7254	33.7897	0.80981	-0.304344	0.500121	0.685969	NA	NA	0	0	0	0	0	0	0	0	0	0	1
I	430088	431033	946	-1	SPNCRNA.645	c("SPAC13C5.03", "SPAC13C5.04")	238	202	311	449	3.38461	3.43981	3.7237	3.73314	287.577	329.794	245.36	0.74398	-0.426664	0.0183777	0.0459501	NA	NA	0	0	0	0	0	0	0	0	0	0	1
I	431367	433274	1908	-1	SPAC13C5.05c	NULL	798	600	1502	1854	4.18363	4.06402	5.0492	4.83259	1125.43	1476.94	773.931	0.52401	-0.932334	8.38799e-10	6.66817e-09	NA	NA	0	0	0	0	0	0	0	0	0	0	1
I	434102	435179	1078	-1	SPAC13C5.06c	c("SPNCRNA.05", "SPAC13C5.07")	332	265	276	399	3.7365	3.70313	3.42313	3.43449	312.279	292.874	331.683	1.13251	0.179525	0.324026	0.50462	NA	NA	0	0	0	0	0	0	0	0	0	0	1
I	435113	436058	946	-1	SPNCRNA.646	SPAC13C5.07	112	87	138	184	2.29715	2.22455	2.55146	2.44613	125.555	140.728	110.381	0.784356	-0.35042	0.183321	0.323282	NA	NA	0	0	0	0	0	0	0	0	0	0	1
I	436953	438699	1747	-1	SPNCRNA.647	SPAC13C5.07	153	116	113	172	1.86221	1.75462	1.37815	1.46387	136.042	123.091	148.992	1.21042	0.275506	0.271255	0.441691	NA	NA	0	0	0	0	0	0	0	0	0	0	1
I	439141	440079	939	-1	SPNCRNA.648	SPAC13C5.07	203	218	160	164	3.16584	3.5605	2.77558	2.29084	191.548	144.993	238.104	1.64217	0.715605	0.0347063	0.0796738	NA	NA	0	0	0	0	0	0	0	0	0	0	1
I	446175	446702	528	-1	SPNCRNA.649	SPAC23E2.02	95	77	55	58	2.90095	2.88969	2.0656	1.62186	73.0441	50.4399	95.6484	1.89628	0.923175	0.00324005	0.00968094	NA	NA	0	0	0	0	0	0	0	0	0	0	1
I	450860	453603	2744	-1	SPAC23E2.03c	NULL	137	90	138	204	1.05146	0.737095	1.0151	1.05863	136.379	148.095	124.664	0.841788	-0.248472	0.343436	0.525843	NA	NA	0	0	0	0	0	0	0	0	0	0	1
I	456931	460811	3881	-1	SPAC24H6.13	SPNCRNA.651	5123	3955	5697	8546	5.77605	5.69455	5.8824	5.94709	5596.52	6159.53	5033.52	0.817191	-0.291254	0.00615126	0.0172483	NA	NA	0	0	0	0	0	0	0	0	0	0	1
I	465302	468551	3250	-1	SPNCRNA.652	SPAC24H6.11c	435	301	269	343	2.47413	2.2347	1.73387	1.56411	336.994	268.548	405.439	1.50975	0.594305	0.000366979	0.00132847	NA	NA	0	0	0	0	0	0	0	0	0	0	1
I	469981	472993	3013	-1	SPAC24H6.09	NULL	2735	1930	3261	4773	5.2624	5.05128	5.46932	5.49854	3027.4	3482	2572.79	0.738883	-0.436582	0.000133738	0.00052259	NA	NA	0	0	0	0	0	0	0	0	0	0	1
I	473792	475041	1250	-1	SPAC24H6.08	NULL	558	431	419	686	4.21189	4.13113	3.75172	3.94262	511.287	474.182	548.392	1.1565	0.209764	0.200876	0.348154	NA	NA	0	0	0	0	0	0	0	0	0	0	1
I	475354	476128	775	-1	SPAC24H6.07	NULL	9480	8414	17567	26711	9.0744	9.19412	9.91746	10.0017	14565.3	19125.4	10005.2	0.523137	-0.934739	9.81266e-20	1.49861e-18	NA	NA	0	0	0	0	0	0	0	0	0	0	1
I	476474	478803	2330	-1	SPAC24H6.06	NULL	1778	1204	2268	2966	5.01544	4.74484	5.31975	5.18649	1966.03	2291.48	1640.59	0.715953	-0.482063	0.000163416	0.000627727	NA	NA	0	0	0	0	0	0	0	0	0	0	1
I	479228	482556	3329	-1	SPAC24H6.05	NULL	1672	1106	1564	2230	4.42597	4.12156	4.28278	4.27422	1587.22	1648.2	1526.25	0.926006	-0.110907	0.442634	0.628451	NA	NA	0	0	0	0	0	0	0	0	0	0	1
I	482607	485408	2802	-1	SPAC24H6.04	NULL	12514	10264	16253	22553	7.5345	7.54036	7.86481	7.81706	14787.5	16899.3	12675.8	0.750076	-0.414891	6.55812e-05	0.000270435	NA	NA	0	0	0	0	0	0	0	0	0	0	1
I	485723	488811	3089	-1	SPAC24H6.03	c("SPNCRNA.653", "SPNCRNA.551", "SPAC24H6.02c")	1436	1041	1514	2133	4.41676	4.24449	4.44621	4.42037	1477.16	1586.04	1368.28	0.862701	-0.213068	0.0958662	0.190716	NA	NA	0	0	0	0	0	0	0	0	0	0	1
I	489023	489562	540	-1	SPNCRNA.654	SPAC24H6.02c	201	183	15	19	3.94972	4.10618	0.158717	-0.0206075	114.983	14.9282	215.039	14.4048	3.84848	3.5761e-33	7.67935e-32	NA	NA	0	0	0	0	0	0	0	0	0	0	1
I	491816	492201	386	-1	SPNCRNA.47	SPAC24H6.01c	15	12	17	14	0.689927	0.659813	0.823643	0.0231781	14.5734	14.144	15.0028	1.06071	0.0850364	0.886459	0.9821	NA	NA	0	0	0	0	0	0	0	0	0	0	1
I	498878	500674	1797	-1	SPAC227.01c	SPAPB21F2.03	451	264	516	832	3.38109	2.90032	3.52848	3.69733	484.636	579.239	390.034	0.673357	-0.570557	0.00590057	0.0166113	NA	NA	0	0	0	0	0	0	0	0	0	0	1
I	501117	501485	369	-1	SPAC227.19c	SPNCRNA.655	121	98	208	275	4.31707	4.30473	5.05179	4.93427	166.516	211.253	121.779	0.576463	-0.794701	0.00054497	0.00191002	NA	NA	0	0	0	0	0	0	0	0	0	0	1
I	501751	502444	694	-1	SPAC227.02c	SPNCRNA.655	465	399	1117	1600	4.79778	4.86875	6.01525	6.01333	830.979	1179.84	482.115	0.408626	-1.29115	7.60552e-21	1.21405e-19	NA	NA	0	0	0	0	0	0	0	0	0	0	1
I	502577	504324	1748	-1	SPAC227.03c	c("SPNCRNA.655", "SPNCRNA.656")	160	187	290	497	1.92593	2.44271	2.73705	2.99388	266.805	336.371	197.24	0.586377	-0.7701	0.00237617	0.00729874	NA	NA	0	0	0	0	0	0	0	0	0	0	1
I	507522	509960	2439	-1	SPAC227.07c	SPAC227.06	5013	3773	4577	6765	6.51529	6.39714	6.33716	6.38049	4887.82	4911.44	4864.21	0.990385	-0.0139391	0.90509	0.991395	NA	NA	0	0	0	0	0	0	0	0	0	0	1
I	510410	511433	1024	-1	SPAC227.08c	c("SPNCRNA.657", "SPAC227.09")	520	397	398	641	4.63464	4.53708	4.20204	4.36923	477.31	446.506	508.114	1.13798	0.186473	0.261306	0.429158	NA	NA	0	0	0	0	0	0	0	0	0	0	1
I	513967	517252	3286	-1	SPAC227.11c	c("SPAC227.10", "SPAC227.12")	1213	861	1360	2024	4.02366	3.82098	4.14183	4.19507	1304.35	1464.48	1144.23	0.781322	-0.356011	0.00488645	0.0140127	NA	NA	0	0	0	0	0	0	0	0	0	0	1
I	517416	519017	1602	-1	SPAC227.13c	SPAC227.12	2595	1733	1929	3698	6.07135	5.7807	5.59661	6.01514	2380.51	2381.86	2379.16	0.998867	-0.00163517	0.942839	1	NA	NA	0	0	0	0	0	0	0	0	0	0	1
I	527782	528906	1125	-1	SPAC227.16c	SPNCRNA.659	708	573	752	1077	5.09994	5.08654	5.14007	5.13792	753.27	794.245	712.294	0.896819	-0.157111	0.251046	0.415034	NA	NA	0	0	0	0	0	0	0	0	0	0	1
I	529167	530275	1109	-1	SPAC227.17c	SPAC227.18	1189	1033	989	1564	5.47597	5.56488	5.16341	5.30425	1169.86	1098.91	1240.81	1.12913	0.175207	0.223883	0.380126	NA	NA	0	0	0	0	0	0	0	0	0	0	1
I	531794	533731	1938	-1	SPAC2F7.02c	SPAC227.18	1082	836	1121	1657	4.53462	4.45431	4.53885	4.58227	1133.24	1202.95	1063.53	0.884103	-0.177714	0.159867	0.290236	NA	NA	0	0	0	0	0	0	0	0	0	0	1
I	534120	537869	3750	-1	SPAC2F7.03c	NULL	2495	1817	3961	5440	4.78763	4.62197	5.4076	5.34498	3240.16	4097.75	2382.57	0.581435	-0.782311	6.14958e-12	5.93882e-11	NA	NA	0	0	0	0	0	0	0	0	0	0	1
I	539919	541640	1722	-1	SPAC2F7.05c	SPAC2F7.04	15701	13061	22206	29115	8.56418	8.59041	9.01742	8.88787	19241.4	22463.4	16019.4	0.713132	-0.48776	3.07927e-06	1.55833e-05	NA	NA	0	0	0	0	0	0	0	0	0	0	1
I	541576	543735	2160	-1	SPAC2F7.06c	c("SPNCRNA.552", "SPNCRNA.660")	391	288	155	277	2.9097	2.76041	1.52794	1.8452	279.701	183.969	375.432	2.04073	1.02909	6.49737e-08	4.16193e-07	NA	NA	0	0	0	0	0	0	0	0	0	0	1
I	544127	546240	2114	-1	SPAC2F7.07c	NULL	4388	3199	5239	7474	6.42907	6.26494	6.63794	6.63017	4857.49	5522.56	4192.42	0.759145	-0.397553	0.000323338	0.00118406	NA	NA	0	0	0	0	0	0	0	0	0	0	1
I	546664	548562	1899	-1	SPAC2F7.08c	NULL	2430	1826	3441	4498	5.7312	5.61075	6.18622	6.05231	2915.96	3475.88	2356.03	0.677823	-0.56102	1.24945e-06	6.66297e-06	NA	NA	0	0	0	0	0	0	0	0	0	0	1
I	548768	550726	1959	-1	SPAC2F7.09c	c("SPNCRNA.661", "SPAC2F7.10")	625	447	700	1000	3.7273	3.53553	3.84394	3.83815	665.042	738.394	591.69	0.801321	-0.319547	0.0302146	0.0708805	NA	NA	0	0	0	0	0	0	0	0	0	0	1
I	558909	560549	1641	-1	SPAC2F7.13c	SPAC2F7.11	4170	3299	5746	8013	6.72096	6.67475	7.13661	7.09603	5068.28	5989.12	4147.44	0.692496	-0.530123	1.09343e-06	5.89912e-06	NA	NA	0	0	0	0	0	0	0	0	0	0	1
I	560824	562179	1356	-1	SPAC2F7.14c	NULL	1449	1201	1986	2730	5.47119	5.49218	5.87914	5.81781	1765.55	2055.47	1475.63	0.717907	-0.478132	5.93169e-05	0.00024587	NA	NA	0	0	0	0	0	0	0	0	0	0	1
I	565035	569485	4451	-1	SPAC2F7.16c	SPAC2F7.15	4412	3479	5584	8204	5.36279	5.31184	5.6558	5.69046	5177.37	5973.83	4380.91	0.733351	-0.447425	3.06814e-05	0.000132197	NA	NA	0	0	0	0	0	0	0	0	0	0	1
I	570753	574417	3665	-1	SPAC13A11.01c	SPAC2F7.17	2659	2178	3518	4834	4.92998	4.93391	5.287	5.2251	3165.94	3640.34	2691.53	0.739363	-0.435646	0.000100441	0.000400921	NA	NA	0	0	0	0	0	0	0	0	0	0	1
I	574652	577171	2520	-1	SPAC13A11.02c	NULL	4914	2918	6282	8764	6.33896	5.87885	6.64643	6.60643	5412.51	6549.1	4275.91	0.6529	-0.615066	0.000362709	0.00131341	NA	NA	0	0	0	0	0	0	0	0	0	0	1
I	579353	581553	2201	-1	SPAC13A11.04c	SPAC13A11.03	940	779	893	1476	4.37549	4.39626	4.25463	4.45923	986.475	1015.75	957.204	0.942364	-0.0856437	0.416855	0.604412	NA	NA	0	0	0	0	0	0	0	0	0	0	1
I	584478	587656	3179	-1	SPNCRNA.662	SPAC13A11.06	406	331	529	684	2.40647	2.40363	2.7414	2.59176	470.794	531.601	409.986	0.771228	-0.37477	0.0198073	0.0490849	NA	NA	0	0	0	0	0	0	0	0	0	0	1
I	585266	587631	2366	-1	SPNCRNA.553	SPAC13A11.06	336	274	461	615	2.55957	2.5571	2.96902	2.86448	404.79	470.237	339.342	0.721641	-0.470647	0.00466431	0.0134754	NA	NA	0	0	0	0	0	0	0	0	0	0	1
I	590784	592586	1803	-1	SPNCRNA.663	c("SPAC3H8.03", "SPAC3H8.04")	185	176	115	181	2.09069	2.31055	1.35794	1.49193	165.079	127.464	202.694	1.59021	0.669215	0.00481427	0.0138321	NA	NA	0	0	0	0	0	0	0	0	0	0	1
I	593901	597586	3686	-1	SPAC3H8.05c	SPAC3H8.04	1778	1272	1900	2905	4.35494	4.1636	4.40383	4.49601	1878.97	2074.45	1683.48	0.811528	-0.301287	0.0111615	0.0294274	NA	NA	0	0	0	0	0	0	0	0	0	0	1
I	597665	598076	412	-1	SPNCRNA.664	SPNCRNA.156	36	28	20	34	1.85891	1.78816	0.964064	1.20923	29.2993	23.0964	35.5022	1.53713	0.620241	0.237755	0.398437	NA	NA	0	0	0	0	0	0	0	0	0	0	1
I	598131	599439	1309	-1	SPNCRNA.665	c("SPNCRNA.156", "SPAC3H8.06")	8	14	6	5	-1.97871	-0.879569	-2.44058	-3.22392	8.90417	5.01368	12.7947	2.55195	1.3516	0.169844	0.304527	NA	NA	0	0	0	0	0	0	0	0	0	0	1
I	600826	601749	924	-1	SPAC3H8.07c	NULL	627	499	892	1197	4.9691	4.93149	5.43082	5.33477	768.968	912.459	625.477	0.685485	-0.544803	0.000101234	0.000403457	NA	NA	0	0	0	0	0	0	0	0	0	0	1
I	601848	603993	2146	-1	SPAC3H8.08c	NULL	710	505	912	1339	3.77973	3.58	4.09409	4.12777	822.866	975.333	670.399	0.687354	-0.540874	8.95615e-05	0.000360528	NA	NA	0	0	0	0	0	0	0	0	0	0	1
I	604312	607742	3431	-1	SPAC3H8.09c	SPNCRNA.666	563	463	676	802	2.82685	2.83654	3.04389	2.7701	611.915	652.779	571.051	0.874801	-0.192974	0.251359	0.41541	NA	NA	0	0	0	0	0	0	0	0	0	0	1
I	608406	608831	426	-1	SPNCRNA.667	NULL	21	14	15	20	1.0331	0.739952	0.50082	0.395495	17.2673	15.2966	19.238	1.25767	0.330753	0.61922	0.790505	NA	NA	0	0	0	0	0	0	0	0	0	0	1
I	613369	617324	3956	-1	SPAC1F3.02c	NULL	2181	1607	2280	3194	4.51643	4.36763	4.53362	4.49959	2238.15	2381.8	2094.5	0.879378	-0.185445	0.126565	0.23968	NA	NA	0	0	0	0	0	0	0	0	0	0	1
I	621054	622267	1214	-1	SPAC1F3.04c	SPAC1F3.03	660	552	905	1384	4.66767	4.70168	5.07626	5.16875	831.733	988.207	675.259	0.683318	-0.549371	3.58867e-05	0.000153227	NA	NA	0	0	0	0	0	0	0	0	0	0	1
I	625173	631401	6229	-1	SPAC1F3.06c	SPAC1F3.05	16429	11983	22082	29653	6.77466	6.61122	7.15443	7.05937	19148.2	22596	15700.3	0.694827	-0.525274	8.20635e-07	4.50018e-06	NA	NA	0	0	0	0	0	0	0	0	0	0	1
I	631511	633102	1592	-1	SPAC1F3.07c	SPNCRNA.668	632	388	964	1253	4.11131	3.69926	4.67356	4.53148	764.55	971.15	557.95	0.574525	-0.799559	2.39888e-06	1.23588e-05	NA	NA	0	0	0	0	0	0	0	0	0	0	1
I	633148	633474	327	-1	SPAC1F3.08c	SPNCRNA.668	1	0	2	2	-2.97755	-16.6096	-2.02446	-2.5448	1.14482	1.794	0.495642	0.276278	-1.85581	0.756893	0.894442	NA	NA	0	0	0	0	0	0	0	0	0	0	1
I	633767	634868	1102	-1	SPNCRNA.669	SPAC1F3.09	154	125	130	193	2.53637	2.52718	2.24509	2.29482	147.489	139.814	155.164	1.10979	0.150288	0.555278	0.737111	NA	NA	0	0	0	0	0	0	0	0	0	0	1
I	634898	639430	4533	-1	SPAC1F3.10c	c("SPAC1F3.09", "SPAC1D4.01")	1162	836	1136	1759	3.41163	3.22841	3.33213	3.44256	1175.82	1248.45	1103.18	0.883643	-0.178464	0.158961	0.289177	NA	NA	0	0	0	0	0	0	0	0	0	0	1
I	639545	641680	2136	-1	SPAC1D4.02c	SPAC1D4.01	1092	859	641	999	4.54269	4.48826	3.72726	3.84705	894.914	706.833	1083	1.53218	0.615586	5.89868e-06	2.86555e-05	NA	NA	0	0	0	0	0	0	0	0	0	0	1
I	641845	643775	1931	-1	SPAC1D4.03c	NULL	512	375	416	566	3.52608	3.36864	3.17966	3.10352	459.336	428.399	490.274	1.14443	0.194634	0.189777	0.332373	NA	NA	0	0	0	0	0	0	0	0	0	0	1
I	643960	644683	724	-1	SPNCRNA.670	SPAC1D4.04	114	97	51	82	2.70853	2.76737	1.50121	1.66598	87.4219	57.1647	117.679	2.0586	1.04166	0.000659814	0.00227663	NA	NA	0	0	0	0	0	0	0	0	0	0	1
I	644623	648097	3475	-1	SPAC1D4.05c	SPAC1D4.04	1247	1015	942	1412	3.91869	3.91352	3.46717	3.53075	1138.14	1018.08	1258.21	1.23586	0.305516	0.019694	0.0488443	NA	NA	0	0	0	0	0	0	0	0	0	0	1
I	648301	649393	1093	-1	SPAC1D4.06c	NULL	767	562	942	1328	5.11151	4.95467	5.36115	5.33625	860.871	987.142	734.6	0.744168	-0.4263	0.00195238	0.00609371	NA	NA	0	0	0	0	0	0	0	0	0	0	1
I	649449	649889	441	-1	SPAC1D4.07c	NULL	16	11	9	17	0.590859	0.342107	-0.286064	0.111107	12.9436	11.0195	14.8678	1.34922	0.432128	0.622632	0.79357	NA	NA	0	0	0	0	0	0	0	0	0	0	1
I	652225	653321	1097	-1	SPAC1D4.09c	NULL	1723	1340	2475	3278	6.24355	6.17267	6.7192	6.60422	2107.47	2515.83	1699.1	0.675365	-0.566261	1.83251e-06	9.60588e-06	NA	NA	0	0	0	0	0	0	0	0	0	0	1
I	656076	660381	4306	-1	SPAC1D4.11c	c("SPAC1D4.10", "SPNCRNA.671")	899	507	984	1360	3.11553	2.58101	3.19901	3.14553	893.235	1021.13	765.337	0.749498	-0.416004	0.0702619	0.146682	NA	NA	0	0	0	0	0	0	0	0	0	0	1
I	660778	664180	3403	-1	SPNCRNA.672	SPNCRNA.671	253	259	318	386	1.62589	1.95152	1.90892	1.66814	299.517	310.291	288.744	0.930557	-0.103833	0.633367	0.803269	NA	NA	0	0	0	0	0	0	0	0	0	0	1
I	663144	663352	209	-1	SPNCRNA.79	SPNCRNA.671	15	14	9	12	1.57502	1.7673	0.791203	0.685878	12.721	9.17793	16.2642	1.77209	0.825455	0.306039	0.483636	NA	NA	0	0	0	0	0	0	0	0	0	0	1
I	664677	665246	570	-1	SPNCRNA.673	SPAC1D4.12	40	26	10	20	1.5426	1.21293	-0.504241	-0.0246093	24.4383	12.6531	36.2234	2.8628	1.51743	0.00755654	0.0207571	NA	NA	0	0	0	0	0	0	0	0	0	0	1
I	667910	669749	1840	-1	SPNCRNA.674	SPAC1D4.13	320	247	348	481	2.85192	2.77018	2.92608	2.87267	337.762	361.141	314.384	0.870527	-0.200038	0.267489	0.437339	NA	NA	0	0	0	0	0	0	0	0	0	0	1
I	673984	678307	4324	-1	SPAC22F3.13	SPAC1D4.14	3464	2584	3450	5271	5.05556	4.92454	5.00286	5.09398	3555.96	3765.35	3346.58	0.888785	-0.170094	0.119832	0.229419	NA	NA	0	0	0	0	0	0	0	0	0	0	1
I	678571	680480	1910	-1	SPNCRNA.675	c("SPNCRNA.158", "SPAC22F3.12c")	191	175	156	192	2.05356	2.21916	1.71468	1.49388	179.114	153.191	205.037	1.33844	0.420549	0.0538068	0.117308	NA	NA	0	0	0	0	0	0	0	0	0	0	1
I	697195	697871	677	-1	SPNCRNA.676	SPAC22F3.05c	17	29	17	19	0.0599493	1.12227	0.0130938	-0.3468	21.3506	15.9856	26.7156	1.67123	0.740911	0.347694	0.530356	NA	NA	0	0	0	0	0	0	0	0	0	0	1
I	697960	702533	4574	-1	SPAC22F3.04	SPAC22F3.05c	48	49	27	21	-1.12963	-0.808079	-2.00654	-2.88942	38.3516	22.0091	54.6942	2.48507	1.31329	0.00237739	0.00730065	NA	NA	0	0	0	0	0	0	0	0	0	0	1
I	703075	703147	73	-1	SPATRNAVAL.02	NULL	17	26	47	83	3.27312	4.17791	4.69339	4.99348	40.1209	55.4183	24.8236	0.447932	-1.15865	0.00479794	0.0138026	NA	NA	0	0	0	0	0	0	0	0	0	0	1
I	705042	708014	2973	-1	SPAC22F3.02	SPAC22F3.03c	409	284	151	187	2.51374	2.27934	1.02934	0.817465	265.269	148.706	381.831	2.56769	1.36047	5.45525e-13	5.74417e-12	NA	NA	0	0	0	0	0	0	0	0	0	0	1
I	707948	710479	2532	-1	SPAC1296.01c	SPAC22F3.03c	2952	2307	3656	5283	5.83553	5.77167	6.09724	6.10797	3398.4	3878.68	2918.11	0.752348	-0.410527	0.00021805	0.000819497	NA	NA	0	0	0	0	0	0	0	0	0	0	1
I	712217	714070	1854	-1	SPAC1296.03c	SPAC1296.02	350	242	186	319	2.97027	2.72974	2.01137	2.26926	270.963	215.828	326.099	1.51093	0.595432	0.00174309	0.00550777	NA	NA	0	0	0	0	0	0	0	0	0	0	1
I	716874	718168	1295	-1	SPAC1296.05c	SPAC1296.04	1191	868	1925	2636	5.35623	5.19164	6.00206	5.93519	1563.17	1988.59	1137.74	0.572133	-0.805578	7.24198e-11	6.25866e-10	NA	NA	0	0	0	0	0	0	0	0	0	0	1
I	718119	718190	72	-1	SPATRNAGLU.01	NULL	7	29	31	51	2.01292	4.35536	4.1129	4.31077	28.4662	35.1732	21.7592	0.61863	-0.692851	0.30635	0.483965	NA	NA	0	0	0	0	0	0	0	0	0	0	1
I	719090	723684	4595	-1	SPAPJ696.01c	SPAC1296.06	2548	1967	2380	3348	4.57559	4.49404	4.43033	4.40231	2497.42	2491.39	2503.44	1.00484	0.00696589	0.925296	1	NA	NA	0	0	0	0	0	0	0	0	0	0	1
I	725865	728242	2378	-1	SPAC22G7.01c	SPAPJ696.02	3811	2929	5426	7862	6.18199	6.09404	6.64485	6.6595	4750.24	5764.33	3736.15	0.648151	-0.625599	9.37984e-09	6.70212e-08	NA	NA	0	0	0	0	0	0	0	0	0	0	1
I	729850	732457	2608	-1	SPNCRNA.677	c("SPAC22G7.02", "SPAC22G7.03")	594	442	569	682	3.24108	3.10647	3.13219	2.87317	562.592	552.012	573.172	1.03833	0.0542687	0.594451	0.767026	NA	NA	0	0	0	0	0	0	0	0	0	0	1
I	736520	738893	2374	-1	SPNCRNA.678	c("SPAC22G7.04", "SPAC22G7.05")	388	274	136	152	2.7623	2.55223	1.20299	0.843097	246.5	127.885	365.116	2.85503	1.51351	6.21512e-15	7.52079e-14	NA	NA	0	0	0	0	0	0	0	0	0	0	1
I	739167	746117	6951	-1	SPAC22G7.06c	NULL	55088	36337	90785	129651	8.36193	8.05345	9.03579	9.02954	72985	95749	50221	0.524507	-0.930967	6.33481e-19	9.26224e-18	NA	NA	0	0	0	0	0	0	0	0	0	0	1
I	746537	748971	2435	-1	SPAC22G7.07c	NULL	503	440	439	653	3.10019	3.19895	2.857	2.9095	499.705	472.602	526.807	1.1147	0.15665	0.35896	0.543599	NA	NA	0	0	0	0	0	0	0	0	0	0	1
I	751647	753492	1846	-1	SPAC22G7.09c	SPAC22G7.08	1249	1057	1854	2525	5.03087	5.08188	5.55388	5.47916	1597.93	1910.18	1285.69	0.673072	-0.571166	2.21962e-06	1.14995e-05	NA	NA	0	0	0	0	0	0	0	0	0	0	1
I	754932	755637	706	-1	SPAC22G7.11c	SPAC22G7.10	168	149	147	208	3.30428	3.42294	3.06478	3.04518	165.783	154.326	177.239	1.14847	0.199717	0.407674	0.595633	NA	NA	0	0	0	0	0	0	0	0	0	0	1
I	756479	757153	675	-1	SPAC4G8.02c	NULL	821	718	1412	1868	6.41287	6.51128	7.1483	7.03169	1147.13	1434.51	859.751	0.599332	-0.738572	7.59643e-09	5.48002e-08	NA	NA	0	0	0	0	0	0	0	0	0	0	1
I	757915	762714	4800	-1	SPAC4G8.03c	NULL	765	489	683	872	2.72598	2.37217	2.51555	2.34763	684.915	682.262	687.569	1.00778	0.0111789	0.803638	0.927316	NA	NA	0	0	0	0	0	0	0	0	0	0	1
I	772650	774027	1378	-1	SPAC4G8.06c	SPAC4G8.05	1391	959	1358	2200	5.38903	5.14433	5.30754	5.48319	1411.25	1528.25	1294.26	0.846893	-0.239748	0.065295	0.137823	NA	NA	0	0	0	0	0	0	0	0	0	0	1
I	774000	776062	2063	-1	SPAC4G8.07c	NULL	1247	1000	1966	2867	4.98642	4.95977	5.59637	5.62028	1672.05	2095.35	1248.75	0.59596	-0.746712	4.72468e-10	3.83728e-09	NA	NA	0	0	0	0	0	0	0	0	0	0	1
I	777800	778374	575	-1	SPNCRNA.682	SPAC4G8.08	12	14	5	11	-0.206954	0.307247	-1.51682	-0.899694	10.7361	6.69488	14.7772	2.20724	1.14225	0.226531	0.383971	NA	NA	0	0	0	0	0	0	0	0	0	0	1
I	778805	781335	2531	-1	SPNCRNA.683	SPAC4G8.09	100	64	79	145	0.713858	0.361818	0.326929	0.682692	92.5497	95.1716	89.9277	0.944901	-0.0817653	0.77116	0.905184	NA	NA	0	0	0	0	0	0	0	0	0	0	1
I	781347	783634	2288	-1	SPAC4G8.11c	SPAC4G8.10	198	152	149	256	1.97625	1.88663	1.51921	1.77967	183.531	173.062	194.001	1.12099	0.164768	0.507705	0.689188	NA	NA	0	0	0	0	0	0	0	0	0	0	1
I	783822	786724	2903	-1	SPAC4G8.12c	NULL	566	419	628	826	3.167	3.02496	3.2701	3.14512	590.515	636.242	544.788	0.85626	-0.223879	0.158616	0.288752	NA	NA	0	0	0	0	0	0	0	0	0	0	1
I	786778	790219	3442	-1	SPAC4G8.13c	SPNCRNA.684	1152	873	1362	1963	3.79638	3.68811	3.99111	3.99808	1282.32	1443.07	1121.56	0.777207	-0.363629	0.00387935	0.0114081	NA	NA	0	0	0	0	0	0	0	0	0	0	1
I	790245	792274	2030	-1	SPAC16C9.01c	c("SPNCRNA.684", "SPNCRNA.685")	1176	845	1442	2055	4.73674	4.55169	4.98407	4.97477	1317.52	1519.25	1115.8	0.734442	-0.44528	0.000456255	0.00161942	NA	NA	0	0	0	0	0	0	0	0	0	0	1
I	792521	793937	1417	-1	SPAC16C9.02c	SPNCRNA.686	3087	2317	3661	5459	6.658	6.53586	6.85717	6.91321	3468.74	3946.14	2991.33	0.75804	-0.399654	0.00031563	0.00115855	NA	NA	0	0	0	0	0	0	0	0	0	0	1
I	796876	798833	1958	-1	SPAC16C9.04c	NULL	1164	866	1236	1734	4.73064	4.5958	4.77037	4.73843	1207.6	1292.11	1123.1	0.869195	-0.202248	0.123355	0.234911	NA	NA	0	0	0	0	0	0	0	0	0	0	1
I	799485	800012	528	-1	SPNCRNA.687	SPAC16C9.05	396	339	216	353	4.96045	5.02805	4.03912	4.2274	327.143	244.211	410.075	1.67918	0.74776	3.95332e-05	0.000167806	NA	NA	0	0	0	0	0	0	0	0	0	0	1
I	801141	804123	2983	-1	SPAC16C9.06c	NULL	3768	2796	4577	6260	5.71252	5.5739	5.94627	5.87766	4178.2	4725.44	3630.96	0.768386	-0.380096	0.000737277	0.00251428	NA	NA	0	0	0	0	0	0	0	0	0	0	1
I	811443	814228	2786	-1	SPAC2G11.03c	c("SPAC2G11.02", "SPAC2G11.04")	1924	1372	1899	2746	4.94164	4.74562	4.87591	4.88764	1917.14	2015.36	1818.91	0.902522	-0.147967	0.236185	0.39636	NA	NA	0	0	0	0	0	0	0	0	0	0	1
I	815388	817984	2597	-1	SPAC2G11.05c	SPAC2G11.04	636	496	353	598	3.34574	3.27887	2.44953	2.68964	517.462	406.878	628.046	1.54357	0.626275	6.96477e-05	0.000285732	NA	NA	0	0	0	0	0	0	0	0	0	0	1
I	818362	819834	1473	-1	SPNCRNA.688	SPAC2G11.06	625	514	582	861	4.13866	4.14838	3.98896	4.03359	629.38	624.813	633.946	1.01462	0.0209353	0.934022	1	NA	NA	0	0	0	0	0	0	0	0	0	0	1
I	819768	821920	2153	-1	SPAC2G11.07c	NULL	9041	7265	9641	14933	7.65977	7.63606	7.70561	7.8165	9830.04	10597.1	9062.99	0.855234	-0.225608	0.0245205	0.0590579	NA	NA	0	0	0	0	0	0	0	0	0	0	1
I	822092	823278	1187	-1	SPAC2G11.08c	NULL	377	289	399	490	3.79436	3.70267	3.82932	3.60535	380.271	391.419	369.124	0.943039	-0.0846104	0.708316	0.862225	NA	NA	0	0	0	0	0	0	0	0	0	0	1
I	826313	828123	1811	-1	SPAC2G11.10c	c("SPAC2G11.09", "SPNCRNA.689")	1044	792	1317	1750	4.81187	4.70513	5.10015	4.98988	1178.89	1340.83	1016.95	0.758449	-0.398876	0.00227411	0.00700858	NA	NA	0	0	0	0	0	0	0	0	0	0	1
I	828321	831629	3309	-1	SPAC2G11.11c	SPNCRNA.690	903	672	1625	2162	3.5579	3.42345	4.35868	4.25025	1263.4	1655.41	871.382	0.526385	-0.92581	5.03997e-13	5.33037e-12	NA	NA	0	0	0	0	0	0	0	0	0	0	1
I	836307	837262	956	-1	SPNCRNA.691	SPAC2G11.13	169	130	55	70	2.8755	2.7888	1.20913	1.03669	110.306	54.8597	165.752	3.02138	1.59521	5.26315e-09	3.85472e-08	NA	NA	0	0	0	0	0	0	0	0	0	0	1
I	841471	842624	1154	-1	SPAC2G11.15c	SPAC2G11.14	667	546	560	808	4.85767	4.8607	4.55856	4.56712	634.303	593.661	674.945	1.13692	0.185129	0.212773	0.364875	NA	NA	0	0	0	0	0	0	0	0	0	0	1
I	843102	844243	1142	-1	SPNCRNA.692	SPAC521.02	111	69	106	143	2.01256	1.61848	1.89921	1.81079	103.621	108.71	98.5332	0.90639	-0.141796	0.697645	0.855504	NA	NA	0	0	0	0	0	0	0	0	0	0	1
I	846022	849480	3459	-1	SPAC521.04c	c("SPAC521.03", "SPNCRNA.693", "SPAC521.05")	1587	1081	1694	2404	4.25143	3.98931	4.29871	4.28335	1624.68	1781.02	1468.35	0.824443	-0.278508	0.0284548	0.0672782	NA	NA	0	0	0	0	0	0	0	0	0	0	1
I	854453	869704	15252	-1	SPAC23G3.02c	NULL	8146	5216	8180	12000	4.49257	4.14124	4.45173	4.48422	8035.77	8744.41	7327.13	0.837921	-0.255113	0.0848155	0.172126	NA	NA	0	0	0	0	0	0	0	0	0	0	1
I	872757	873497	741	-1	SPNCRNA.694	c("SPAC23G3.03", "SPAC23G3.04")	15	7	12	10	-0.250937	-1.05865	-0.619716	-1.4031	10.9384	10.0274	11.8494	1.18171	0.240871	0.717668	0.863302	NA	NA	0	0	0	0	0	0	0	0	0	0	1
I	874160	875763	1604	-1	SPAC23G3.05c	SPAC23G3.04	436	397	570	769	3.49621	3.65284	3.83599	3.74765	525.532	584.584	466.48	0.797969	-0.325595	0.0290782	0.068617	NA	NA	0	0	0	0	0	0	0	0	0	0	1
I	879147	880546	1400	-1	SPAC23G3.07c	NULL	915	703	1162	1502	4.92656	4.83812	5.22447	5.07438	1032.21	1167.54	896.881	0.76818	-0.380484	0.00478582	0.0137734	NA	NA	0	0	0	0	0	0	0	0	0	0	1
I	880660	884231	3572	-1	SPAC23G3.08c	NULL	2496	2018	2770	4039	4.85837	4.84349	4.96178	4.98553	2730.96	2952.08	2509.84	0.850193	-0.234138	0.0349554	0.0801384	NA	NA	0	0	0	0	0	0	0	0	0	0	1
I	884513	887531	3019	-1	SPAC23G3.10c	c("SPAC23G3.09", "SPAC23G3.11")	3053	2276	3721	4906	5.39164	5.25973	5.63025	5.50874	3361.4	3774.19	2948.62	0.781261	-0.356124	0.00211655	0.00655836	NA	NA	0	0	0	0	0	0	0	0	0	0	1
I	889058	892211	3154	-1	SPAC23G3.12c	SPAC23G3.11	7883	6405	13049	19323	6.69705	6.68931	7.37731	7.42333	10981.2	14015.7	7946.65	0.566981	-0.818629	4.57678e-15	5.60814e-14	NA	NA	0	0	0	0	0	0	0	0	0	0	1
I	893278	894532	1255	-1	SPAC22H12.01c	SPAC22H12.02	1671	1308	1131	2099	5.78851	5.72697	5.17854	5.55028	1512.09	1371.03	1653.15	1.20577	0.269952	0.15717	0.286554	NA	NA	0	0	0	0	0	0	0	0	0	0	1
I	898045	898994	950	-1	SPAC22H12.04c	NULL	54566	43868	69283	98633	11.2194	11.1964	11.5171	11.5063	63834.3	72956.8	54711.9	0.749922	-0.415188	4.71354e-05	0.000198273	NA	NA	0	0	0	0	0	0	0	0	0	0	1
I	899283	902080	2798	-1	SPAC22H12.05c	NULL	976	832	1154	1685	3.85604	3.91756	4.05088	4.07662	1119.59	1230.71	1008.47	0.819422	-0.287321	0.0201997	0.0499636	NA	NA	0	0	0	0	0	0	0	0	0	0	1
I	905077	906465	1389	-1	SPAC1687.03c	SPAC1687.02	1666	1332	2345	3577	5.8597	5.82872	6.30604	6.39484	2111.52	2557.23	1665.81	0.651411	-0.618359	7.81134e-08	4.93512e-07	NA	NA	0	0	0	0	0	0	0	0	0	0	1
I	906863	908571	1709	-1	SPNCRNA.695	SPAC1687.04	286	210	231	307	2.79642	2.64261	2.44144	2.33143	254.698	235.199	274.197	1.16581	0.22133	0.218938	0.373845	NA	NA	0	0	0	0	0	0	0	0	0	0	1
I	911227	911720	494	-1	SPAC1687.06c	SPAC1687.05	18579	14898	21387	31093	10.6085	10.5818	10.7647	10.7842	20681.7	22759	18604.4	0.817454	-0.290791	0.00441941	0.0128328	NA	NA	0	0	0	0	0	0	0	0	0	0	1
I	912230	912396	167	-1	SPRRNA.12	NULL	1	2	0	3	-2.00816	-0.716382	-16.6096	-0.990447	1.43097	1.10494	1.757	1.59013	0.669147	1	1	NA	NA	0	0	0	0	0	0	0	0	0	0	1
I	919783	920837	1055	-1	SPNCRNA.696	SPAC1687.10	65	32	36	47	1.35483	0.624281	0.455537	0.319839	44.371	36.3434	52.3985	1.44176	0.527831	0.158745	0.288938	NA	NA	0	0	0	0	0	0	0	0	0	0	1
I	925111	926289	1179	-1	SPAC1687.12c	SPAC1687.11	2828	2060	3063	4324	6.92816	6.76284	6.99647	6.97353	2956.41	3211.95	2700.88	0.840883	-0.250022	0.0319872	0.0743559	NA	NA	0	0	0	0	0	0	0	0	0	0	1
I	926394	927671	1278	-1	SPAC1687.13c	NULL	371	358	490	764	3.79832	4.03868	4.15283	4.27326	475.057	540.448	409.667	0.758014	-0.399704	0.00628169	0.017568	NA	NA	0	0	0	0	0	0	0	0	0	0	1
I	927801	929011	1211	-1	SPAC1687.14c	NULL	528	435	314	482	4.1779	4.19019	3.38127	3.47917	439.79	343.534	536.045	1.56038	0.641899	8.56886e-05	0.000345634	NA	NA	0	0	0	0	0	0	0	0	0	0	1
I	929156	929654	499	-1	SPAC1687.23c	NULL	2	0	0	1	-2.58732	-16.6096	-16.6096	-4.15437	0.679799	0.368314	0.991284	2.69141	1.42836	0.920093	0.999568	NA	NA	0	0	0	0	0	0	0	0	0	0	1
I	932425	934021	1597	-1	SPAC1687.16c	NULL	1053	893	1279	1434	4.77463	4.82867	5.00828	4.65295	1144.73	1204.35	1085.11	0.900991	-0.150416	0.512653	0.694335	NA	NA	0	0	0	0	0	0	0	0	0	0	1
I	934665	934738	74	-1	SPATRNAALA.01	NULL	0	0	0	0	-16.6096	-16.6096	-16.6096	-16.6096	0	0	0	NA	NA	NA	NA	NA	NA	0	0	0	0	0	0	0	0	0	0	1
I	934941	936081	1141	-1	SPAC1687.17c	NULL	857	731	909	1407	5.19234	5.25473	5.23047	5.34038	942.293	998.792	885.793	0.886863	-0.173216	0.151841	0.278614	NA	NA	0	0	0	0	0	0	0	0	0	0	1
I	936188	938157	1970	-1	SPAC1687.18c	NULL	1575	1251	2248	3012	5.17246	5.132	5.63889	5.54061	1933.73	2297.85	1569.62	0.683082	-0.549869	4.01229e-06	1.99932e-05	NA	NA	0	0	0	0	0	0	0	0	0	0	1
I	938311	939831	1521	-1	SPAC1687.19c	SPNCRNA.697	939	885	1626	2404	4.77473	4.9811	5.52001	5.56375	1384.31	1745.07	1023.56	0.586544	-0.769688	1.9126e-10	1.61002e-09	NA	NA	0	0	0	0	0	0	0	0	0	0	1
I	939770	941944	2175	-1	SPAC1687.20c	c("SPNCRNA.697", "SPAC1687.21")	404	308	528	744	2.9469	2.84729	3.28622	3.26063	473.83	553.171	394.489	0.713141	-0.487742	0.0021002	0.0065161	NA	NA	0	0	0	0	0	0	0	0	0	0	1
I	943265	946909	3645	-1	SPAC1687.22c	SPAC1687.21	3517	2220	2237	3444	5.36567	4.9937	4.66604	4.76819	2797.21	2451.14	3143.28	1.28238	0.358818	0.0457825	0.101867	NA	NA	0	0	0	0	0	0	0	0	0	0	1
I	946892	947942	1051	-1	SPNCRNA.698	NULL	441	355	608	824	4.12257	4.10143	4.53901	4.45722	533.7	624.931	442.47	0.708029	-0.498119	0.00114154	0.00375118	NA	NA	0	0	0	0	0	0	0	0	0	0	1
I	947876	948800	925	-1	SPAC222.03c	SPNCRNA.699	783	759	1346	1701	5.81593	6.06283	6.55066	6.36801	1102.44	1338.11	866.774	0.647759	-0.626471	0.000148523	0.000575675	NA	NA	0	0	0	0	0	0	0	0	0	0	1
I	950120	950813	694	-1	SPAC222.04c	NULL	594	488	516	781	5.15101	5.15924	4.90106	4.97865	581.319	560.455	602.183	1.07446	0.103605	0.532133	0.714351	NA	NA	0	0	0	0	0	0	0	0	0	0	1
I	950912	953006	2095	-1	SPAC222.05c	SPNCRNA.700	1009	798	1092	1582	4.36267	4.31602	4.42986	4.44428	1081.69	1160	1003.39	0.86499	-0.209245	0.101339	0.19988	NA	NA	0	0	0	0	0	0	0	0	0	0	1
I	954279	956707	2429	-1	SPAC222.07c	SPAC222.06	2597	2085	2248	3697	5.59593	5.57095	5.34087	5.53822	2576.15	2550.14	2602.15	1.0204	0.0291278	0.919531	0.999568	NA	NA	0	0	0	0	0	0	0	0	0	0	1
I	957367	958774	1408	-1	SPAC222.08c	NULL	1702	1485	1340	1828	5.64907	5.74411	5.25721	5.18489	1580.93	1381.72	1780.14	1.28836	0.365532	0.00279657	0.00846233	NA	NA	0	0	0	0	0	0	0	0	0	0	1
I	959305	959770	466	-1	SPSNRNA.02	NULL	52116	36596	57327	87125	12.1807	11.9625	12.2714	12.3549	55654.3	62397.3	48911.3	0.783868	-0.351317	0.000705302	0.00241821	NA	NA	0	0	0	0	0	0	0	0	0	0	1
I	962314	964867	2554	-1	SPAC222.10c	NULL	1312	1103	1907	2481	4.41449	4.45597	4.90718	4.76643	1633.96	1921.99	1345.92	0.700276	-0.514005	2.35042e-05	0.000103388	NA	NA	0	0	0	0	0	0	0	0	0	0	1
I	967583	968302	720	-1	SPAC222.17	SPAC222.11	202	166	242	369	3.69162	3.70026	3.90542	3.99367	234.331	263.85	204.813	0.776248	-0.365411	0.0578135	0.124416	NA	NA	0	0	0	0	0	0	0	0	0	0	1
I	968507	970412	1906	-1	SPAC222.12c	NULL	24986	20271	24867	39481	9.08798	9.0781	9.03424	9.1808	26428.4	27688.2	25168.6	0.909002	-0.137645	0.140055	0.260978	NA	NA	0	0	0	0	0	0	0	0	0	0	1
I	970875	973548	2674	-1	SPAC222.13c	SPNCRNA.701	1577	1294	1718	2392	4.72874	4.73521	4.80543	4.76256	1693.51	1789.29	1597.73	0.892941	-0.163364	0.170406	0.305306	NA	NA	0	0	0	0	0	0	0	0	0	0	1
I	973843	976782	2940	-1	SPAC222.14c	SPNCRNA.701	3792	2787	4426	6239	5.88593	5.7335	6.06212	6.03707	4137.53	4637.87	3637.18	0.784235	-0.350642	0.00176684	0.00557696	NA	NA	0	0	0	0	0	0	0	0	0	0	1
I	977075	977568	494	-1	SPNCRNA.50	NULL	16	11	16	17	0.427128	0.178376	0.380273	-0.0526234	14.794	14.7203	14.8678	1.01002	0.0143798	0.984318	1	NA	NA	0	0	0	0	0	0	0	0	0	0	1
I	979482	981161	1680	-1	SPAC222.16c	SPAC222.18	370	271	320	484	3.56368	3.40626	3.30737	3.38394	350.873	347.443	354.302	1.01974	0.0282023	0.875046	0.974322	NA	NA	0	0	0	0	0	0	0	0	0	0	1
I	981473	983481	2009	-1	SPAC821.03c	NULL	2307	1866	3524	4850	5.57503	5.56077	6.13937	6.07977	2984.85	3649.41	2320.3	0.6358	-0.653354	7.29026e-09	5.275e-08	NA	NA	0	0	0	0	0	0	0	0	0	0	1
I	983567	987084	3518	-1	SPAC821.04c	NULL	1741	1197	1247	1676	4.36065	4.11197	3.83234	3.73853	1447.2	1276.56	1617.84	1.26734	0.3418	0.00305972	0.00918912	NA	NA	0	0	0	0	0	0	0	0	0	0	1
I	987631	988266	636	-1	SPSNRNA.03	SPAC821.05	66979	54815	82457	163586	12.094	12.0967	12.3471	12.8151	85806.6	103845	67768.4	0.652593	-0.615745	0.0231669	0.0562833	NA	NA	0	0	0	0	0	0	0	0	0	0	1
I	990025	991617	1593	-1	SPNCRNA.702	SPAC821.06	20	16	16	20	-0.94009	-0.970204	-1.30887	-1.5073	17.9145	15.8252	20.0037	1.26404	0.338041	0.614503	0.786122	NA	NA	0	0	0	0	0	0	0	0	0	0	1
I	991632	994230	2599	-1	SPAC821.07c	c("SPAC821.06", "SPNCRNA.703")	682	511	1043	1497	3.44537	3.32074	4.01141	4.01238	881.545	1102.78	660.306	0.598762	-0.739945	4.84229e-08	3.1488e-07	NA	NA	0	0	0	0	0	0	0	0	0	0	1
I	994941	997625	2685	-1	SPAC821.08c	SPNCRNA.703	2418	1687	3271	4895	5.22438	4.99684	5.61344	5.67465	2897.32	3532.23	2262.42	0.640508	-0.642711	1.75758e-08	1.21044e-07	NA	NA	0	0	0	0	0	0	0	0	0	0	1
I	1002838	1004804	1967	-1	SPAC821.10c	NULL	9060	8402	12026	15545	7.579	7.76203	7.94072	7.79065	10936.5	12083.4	9789.49	0.81016	-0.303721	0.0257379	0.0617421	NA	NA	0	0	0	0	0	0	0	0	0	0	1
I	1010343	1015415	5073	-1	SPAC821.13c	NULL	3009	2178	4759	6169	4.62193	4.44746	5.23645	5.09046	3826.58	4788.14	2865.01	0.598355	-0.740926	6.40356e-11	5.57016e-10	NA	NA	0	0	0	0	0	0	0	0	0	0	1
I	1016103	1019031	2929	-1	SPAC139.01c	SPNCRNA.704	2771	1993	3867	5410	5.34611	5.16246	5.78006	5.74411	3333.69	4037	2630.37	0.651565	-0.618019	5.25071e-08	3.39416e-07	NA	NA	0	0	0	0	0	0	0	0	0	0	1
I	1019248	1020838	1591	-1	SPAC139.02c	SPNCRNA.704	4311	3201	3122	4891	6.81357	6.67589	6.30117	6.42846	3803.75	3451.98	4155.52	1.20381	0.267606	0.0167723	0.0424488	NA	NA	0	0	0	0	0	0	0	0	0	0	1
I	1024002	1025903	1902	-1	SPAC139.04c	c("SPAC139.03", "SPNCRNA.705")	590	448	475	677	3.68676	3.58135	3.32711	3.31798	537.724	500.474	574.974	1.14886	0.200201	0.176948	0.314912	NA	NA	0	0	0	0	0	0	0	0	0	0	1
I	1028239	1030659	2421	-1	SPNCRNA.706	c("SPAC139.05", "SPAC139.06")	144	159	287	450	1.30403	1.7388	2.25215	2.38066	244.562	317.474	171.651	0.540676	-0.887163	2.47814e-06	1.27289e-05	NA	NA	0	0	0	0	0	0	0	0	0	0	1
I	1031904	1033018	1115	-1	SPNCRNA.707	c("SPAC139.06", "SPAC23C4.02")	33	29	22	45	0.297062	0.402462	-0.33475	0.177304	31.4256	28.2052	34.6459	1.22835	0.296724	0.635777	0.80488	NA	NA	0	0	0	0	0	0	0	0	0	0	1
I	1036639	1038267	1629	-1	SPAC23C4.05c	NULL	3346	2710	2678	4108	6.46257	6.45024	6.09443	6.19135	3148.21	2928.85	3367.56	1.14979	0.201369	0.0875278	0.176814	NA	NA	0	0	0	0	0	0	0	0	0	0	1
I	1038515	1042027	3513	-1	SPAC23C4.06c	c("SPAC23C4.07", "SPAC23C4.08")	680	538	1257	1807	3.00639	2.96027	3.84591	3.84916	1003.22	1330.1	676.343	0.50849	-0.975709	1.37295e-13	1.51478e-12	NA	NA	0	0	0	0	0	0	0	0	0	0	1
I	1041980	1044240	2261	-1	SPAC23C4.09c	SPAC23C4.08	995	843	1061	1460	4.51865	4.5713	4.56445	4.50464	1061.75	1098.67	1024.83	0.932786	-0.100382	0.427483	0.614994	NA	NA	0	0	0	0	0	0	0	0	0	0	1
I	1046859	1048934	2076	-1	SPNCRNA.708	SPAC23C4.11	171	147	181	224	1.77375	1.84738	1.80889	1.59603	177.83	178.194	177.465	0.995906	-0.00591865	1	1	NA	NA	0	0	0	0	0	0	0	0	0	0	1
I	1055849	1057578	1730	-1	SPAC23C4.16c	SPAC23C4.15	2533	1860	1703	2659	5.92556	5.77183	5.30594	5.42838	2154.11	1879.7	2428.53	1.29198	0.369581	0.00158058	0.00505147	NA	NA	0	0	0	0	0	0	0	0	0	0	1
I	1057647	1058238	592	-1	SPNCRNA.709	SPAC23C4.17	24	11	20	38	0.751002	-0.082708	0.441114	0.846748	21.7013	24.5696	18.8329	0.766511	-0.383621	0.553612	0.735372	NA	NA	0	0	0	0	0	0	0	0	0	0	1
I	1058646	1063306	4661	-1	SPAC23C4.18c	c("SPAC23C4.17", "SPNCRNA.166")	1166	819	1011	1426	3.415	3.19718	3.16236	3.13819	1077.08	1059.72	1094.45	1.03277	0.0465224	0.647522	0.815534	NA	NA	0	0	0	0	0	0	0	0	0	0	1
I	1066192	1070006	3815	-1	SPAC1A6.01c	c("SPAC23C4.19", "SPAC1A6.02")	1366	1062	1273	1912	3.91433	3.84297	3.76575	3.83223	1362.03	1377.23	1346.83	0.977925	-0.0322047	0.771497	0.905342	NA	NA	0	0	0	0	0	0	0	0	0	0	1
I	1069923	1072343	2421	-1	SPAC1A6.03c	SPAC1A6.02	3890	3117	4977	6285	6.09953	6.07173	6.40818	6.22445	4420	4946.12	3893.88	0.787259	-0.345089	0.00226861	0.00699342	NA	NA	0	0	0	0	0	0	0	0	0	0	1
I	1074331	1077514	3184	-1	SPAC1A6.04c	NULL	14180	11583	19441	25221	7.53043	7.5304	7.93882	7.79398	16950.4	19567.4	14333.4	0.732512	-0.449075	2.08402e-05	9.25171e-05	NA	NA	0	0	0	0	0	0	0	0	0	0	1
I	1079635	1081713	2079	-1	SPAC1A6.05c	NULL	1423	1193	1841	2482	4.89165	4.92912	5.21635	5.127	1672.58	1887.46	1457.7	0.772306	-0.372755	0.00192582	0.00602491	NA	NA	0	0	0	0	0	0	0	0	0	0	1
I	1081916	1083616	1701	-1	SPAC1A6.06c	SPNCRNA.710	92	79	59	87	1.2108	1.28283	0.523031	0.562969	79.3293	63.2357	95.4228	1.509	0.593594	0.0622185	0.132377	NA	NA	0	0	0	0	0	0	0	0	0	0	1
I	1086242	1087505	1264	-1	SPAC1A6.08c	SPAC1A6.07	252	207	211	307	3.04899	3.05701	2.74595	2.76658	240.039	224.625	255.453	1.13724	0.185538	0.363452	0.548721	NA	NA	0	0	0	0	0	0	0	0	0	0	1
I	1087443	1089673	2231	-1	SPAC1A6.09c	NULL	1604	1345	2850	3680	5.0797	5.11744	5.86213	5.71051	2252.71	2862.15	1643.27	0.57414	-0.800524	7.67746e-12	7.3493e-11	NA	NA	0	0	0	0	0	0	0	0	0	0	1
I	1094262	1095547	1286	-1	SPAC30D11.13	SPAC30D11.14c	1081	701	982	1435	5.69541	5.36235	5.50998	5.53688	1012.8	1047.7	977.896	0.933375	-0.0994718	0.545353	0.728108	NA	NA	0	0	0	0	0	0	0	0	0	0	1
I	1096764	1097387	624	-1	SPAC30D11.12	NULL	4935	3705	4267	6574	8.71358	8.59182	8.4569	8.56008	4729.93	4677.2	4782.66	1.02255	0.0321709	0.792497	0.919646	NA	NA	0	0	0	0	0	0	0	0	0	0	1
I	1097449	1099554	2106	-1	SPAC30D11.11	NULL	1632	1217	2249	3176	5.00762	4.87612	5.42341	5.40097	1967.6	2358.78	1576.43	0.668323	-0.581382	1.02654e-06	5.56574e-06	NA	NA	0	0	0	0	0	0	0	0	0	0	1
I	1099489	1101583	2095	-1	SPAC30D11.10	SPNCRNA.711	1466	1192	1729	2330	4.86042	4.85373	5.05162	4.96165	1625.33	1772.27	1478.38	0.834175	-0.261578	0.0322225	0.0748015	NA	NA	0	0	0	0	0	0	0	0	0	0	1
I	1101685	1103890	2206	-1	SPAC30D11.09	SPNCRNA.712	1039	847	2035	2633	4.3473	4.34435	5.27027	5.12159	1547.4	2045.65	1049.16	0.512874	-0.963323	5.93071e-15	7.19114e-14	NA	NA	0	0	0	0	0	0	0	0	0	0	1
I	1106430	1107885	1456	-1	SPAC30D11.07	SPAC30D11.08c	319	249	564	705	3.1851	3.11951	3.96039	3.76195	436.495	557.84	315.149	0.564946	-0.823816	6.05755e-07	3.38839e-06	NA	NA	0	0	0	0	0	0	0	0	0	0	1
I	1109349	1111221	1873	-1	SPAC30D11.05	SPAC30D11.06c	1738	1367	1794	2503	5.71979	5.66519	5.71869	5.6788	1796.96	1870.35	1723.57	0.92152	-0.117913	0.334016	0.515413	NA	NA	0	0	0	0	0	0	0	0	0	0	1
I	1115899	1118412	2514	-1	SPAC30D11.03	NULL	2826	2289	4306	5834	5.59745	5.58522	6.15818	6.07596	3634.79	4425.26	2844.31	0.642744	-0.637683	1.03699e-08	7.37007e-08	NA	NA	0	0	0	0	0	0	0	0	0	0	1
I	1126901	1129344	2444	-1	SPNCRNA.713	SPAC56F8.02	500	441	249	368	3.08624	3.19691	2.03361	2.0768	396.567	267.182	525.951	1.96851	0.977105	7.40361e-09	5.35056e-08	NA	NA	0	0	0	0	0	0	0	0	0	0	1
I	1129391	1129982	592	-1	SPNCRNA.714	SPAC56F8.03	5	6	0	2	-1.512	-0.957164	-16.6096	-3.40103	3.49946	0.736627	6.26229	8.5013	3.08768	0.122725	0.233952	NA	NA	0	0	0	0	0	0	0	0	0	0	1
I	1133226	1134356	1131	-1	SPAC56F8.04c	NULL	385	322	518	690	3.88338	3.9174	4.26462	4.1579	460.948	527.996	393.901	0.746031	-0.422692	0.00793508	0.0216631	NA	NA	0	0	0	0	0	0	0	0	0	0	1
I	1134418	1136038	1621	-1	SPAC56F8.05c	SPNCRNA.715	7230	6106	9871	13213	7.99682	8.04487	8.39916	8.29949	8759.81	10085.2	7434.43	0.737163	-0.439944	3.17184e-05	0.00013642	NA	NA	0	0	0	0	0	0	0	0	0	0	1
I	1136196	1138046	1851	-1	SPAC56F8.06c	NULL	445	336	479	735	3.35217	3.23864	3.41154	3.50889	478.21	523.951	432.469	0.8254	-0.276834	0.0727807	0.151126	NA	NA	0	0	0	0	0	0	0	0	0	0	1
I	1146598	1148060	1463	-1	SPNCRNA.716	c("SPAC56F8.11", "SPAC56F8.12")	1744	1554	850	868	5.62896	5.75436	4.54523	4.0551	1306.78	769.079	1844.48	2.39829	1.26201	9.39475e-11	8.03238e-10	NA	NA	0	0	0	0	0	0	0	0	0	0	1
I	1148131	1152178	4048	-1	SPAC56F8.14c	c("SPAC56F8.13", "SPAC56F8.15")	1278	1025	2038	2449	3.71216	3.68571	4.33857	4.08325	1629.67	1979.46	1279.88	0.646579	-0.629102	0.000125898	0.00049453	NA	NA	0	0	0	0	0	0	0	0	0	0	1
I	1156487	1159594	3108	-1	SPAC22A12.01c	SPAC56F8.16	1342	1000	1706	2480	4.16388	4.03131	4.46326	4.48262	1555.59	1815.36	1295.83	0.713817	-0.486373	6.85931e-05	0.00028208	NA	NA	0	0	0	0	0	0	0	0	0	0	1
I	1159626	1160000	375	-1	SPAC22A12.02c	NULL	14	10	10	13	0.632102	0.43849	0.0998234	-0.0420262	11.6604	10.0749	13.2458	1.31473	0.394764	0.645142	0.813475	NA	NA	0	0	0	0	0	0	0	0	0	0	1
I	1160118	1161595	1478	-1	SPAC22A12.03c	NULL	610	471	621	870	4.09872	4.01745	4.07765	4.04371	624.069	648.747	599.392	0.923923	-0.114155	0.453023	0.639926	NA	NA	0	0	0	0	0	0	0	0	0	0	1
I	1162203	1162901	699	-1	SPAC22A12.04c	NULL	5543	4777	6748	9772	8.36279	8.44004	8.59972	8.61356	6463.42	7166.73	5760.1	0.803728	-0.31522	0.00232239	0.00714088	NA	NA	0	0	0	0	0	0	0	0	0	0	1
I	1163745	1165581	1837	-1	SPAC22A12.06c	NULL	1068	1002	2365	3224	4.59305	4.79283	5.69312	5.61977	1799.54	2437.78	1161.29	0.47637	-1.06985	2.39423e-19	3.58805e-18	NA	NA	0	0	0	0	0	0	0	0	0	0	1
I	1166562	1169743	3182	-1	SPAC22A12.07c	SPNCRNA.717	12094	9045	11768	17394	7.30177	7.17449	7.21549	7.25885	12163.4	12628	11698.8	0.926416	-0.110268	0.297618	0.473884	NA	NA	0	0	0	0	0	0	0	0	0	0	1
I	1170196	1172171	1976	-1	SPAC22A12.08c	NULL	1339	1005	2299	3356	4.98271	4.86056	5.7157	5.74107	1874.5	2451.51	1297.5	0.529265	-0.917937	1.45073e-14	1.69568e-13	NA	NA	0	0	0	0	0	0	0	0	0	0	1
I	1172351	1174497	2147	-1	SPAC22A12.09c	SPAC22A12.10	562	505	613	918	3.61282	3.75035	3.69128	3.75353	629.62	662.196	597.044	0.901613	-0.14942	0.250489	0.414227	NA	NA	0	0	0	0	0	0	0	0	0	0	1
I	1175135	1176651	1517	-1	SPNCRNA.718	SPAC22A12.10	168	129	123	176	2.2008	2.11152	1.70414	1.7007	147.239	129.852	164.626	1.2678	0.342326	0.147839	0.272899	NA	NA	0	0	0	0	0	0	0	0	0	0	1
I	1178856	1180072	1217	-1	SPAC22A12.12c	SPAC22A12.11	934	708	1254	1916	4.99365	4.88579	5.37184	5.46303	1139.06	1368.66	909.451	0.664483	-0.589696	3.45008e-06	1.73647e-05	NA	NA	0	0	0	0	0	0	0	0	0	0	1
I	1180999	1182528	1530	-1	SPAC22A12.14c	c("SPAC22A12.13", "SPNCRNA.719")	1622	1431	2377	3164	5.55624	5.6673	6.06075	5.95299	2064.23	2422.03	1706.44	0.704547	-0.505231	1.38249e-05	6.32687e-05	NA	NA	0	0	0	0	0	0	0	0	0	0	1
I	1182693	1185497	2805	-1	SPAC22A12.15c	NULL	41620	38039	48079	79381	9.26669	9.42871	9.42796	9.63099	49637.4	54655.8	44619.1	0.816365	-0.292714	0.0324555	0.0752406	NA	NA	0	0	0	0	0	0	0	0	0	0	1
I	1185837	1189506	3670	-1	SPAC22A12.17c	SPAC22A12.16	85	65	58	88	-0.0566738	-0.151882	-0.654932	-0.573845	73.0996	63.0754	83.1238	1.31785	0.398185	0.2261	0.383403	NA	NA	0	0	0	0	0	0	0	0	0	0	1
I	1190109	1190905	797	-1	SPNCRNA.720	SPNCRNA.168	122	153	110	92	2.66779	3.28625	2.47156	1.6934	124.501	92.0403	156.962	1.70537	0.770082	0.133399	0.250284	NA	NA	0	0	0	0	0	0	0	0	0	0	1
I	1192702	1195167	2466	-1	SPAC4C5.02c	SPAC4C5.01	1722	1274	1778	2495	5.00123	4.85833	5.00055	4.96897	1757.96	1858.95	1656.98	0.891356	-0.165926	0.185703	0.326668	NA	NA	0	0	0	0	0	0	0	0	0	0	1
I	1195592	1195663	72	-1	SPATRNAALA.02	NULL	2	9	3	7	0.205572	2.6673	0.743675	1.4457	5.41583	4.16425	6.66741	1.60111	0.679068	0.800718	0.925174	NA	NA	0	0	0	0	0	0	0	0	0	0	1
I	1197063	1199912	2850	-1	SPNCRNA.722	c("SPAC4C5.03", "SPAC4C5.04")	243	211	183	285	1.82355	1.91166	1.36759	1.48634	227.617	201.719	253.515	1.25677	0.329723	0.121195	0.231585	NA	NA	0	0	0	0	0	0	0	0	0	0	1
I	1200916	1206090	5175	-1	SPAC10F6.01c	NULL	11256	6792	19562	29006	6.49655	6.05958	7.24705	7.29499	15444	21025.5	9862.53	0.469076	-1.09211	9.21923e-17	1.23513e-15	NA	NA	0	0	0	0	0	0	0	0	0	0	1
I	1206812	1210630	3819	-1	SPAC10F6.02c	SPNCRNA.724	4152	3082	5871	8800	5.51626	5.37813	5.9692	6.03274	5173.37	6345.07	4001.66	0.630672	-0.665037	8.50439e-10	6.75177e-09	NA	NA	0	0	0	0	0	0	0	0	0	0	1
I	1211195	1213553	2359	-1	SPAC10F6.03c	SPAC10F6.04	10150	5385	11597	16915	7.62196	6.99931	7.76737	7.79156	10394.1	12361.2	8426.98	0.681729	-0.55273	0.0259057	0.0620815	NA	NA	0	0	0	0	0	0	0	0	0	0	1
I	1214788	1217067	2280	-1	SPAC10F6.05c	SPAC10F6.04	1175	1057	930	1442	4.49979	4.63892	4.11557	4.22798	1135.9	1022.79	1249.01	1.22118	0.288279	0.0367518	0.0837767	NA	NA	0	0	0	0	0	0	0	0	0	0	1
I	1218321	1218887	567	-1	SPAC10F6.07c	NULL	334	240	271	366	4.61198	4.42698	4.26357	4.17676	297.492	278.077	316.908	1.13964	0.188581	0.262858	0.431117	NA	NA	0	0	0	0	0	0	0	0	0	0	1
I	1219667	1220847	1181	-1	SPAC10F6.08c	SPNCRNA.554	1328	1095	1894	2446	5.67906	5.69255	6.14439	5.99301	1625.52	1902.23	1348.81	0.709068	-0.496004	5.01289e-05	0.000209961	NA	NA	0	0	0	0	0	0	0	0	0	0	1
I	1220969	1224862	3894	-1	SPAC10F6.09c	SPNCRNA.725	2374	2058	3731	5241	4.67757	4.76331	5.28296	5.25288	3188.73	3902.86	2474.59	0.634047	-0.657339	3.01368e-09	2.25819e-08	NA	NA	0	0	0	0	0	0	0	0	0	0	1
I	1226090	1228894	2805	-1	SPAC10F6.11c	SPAC10F6.10	1514	1317	1355	1982	4.48585	4.57655	4.27892	4.30722	1513.69	1446.37	1581.01	1.09309	0.128411	0.339262	0.521514	NA	NA	0	0	0	0	0	0	0	0	0	0	1
I	1229095	1230361	1267	-1	SPAC10F6.12c	NULL	932	636	1482	2145	4.93247	4.67298	5.55476	5.56783	1218.3	1573.54	863.051	0.548476	-0.8665	1.66469e-11	1.53478e-10	NA	NA	0	0	0	0	0	0	0	0	0	0	1
I	1230640	1232155	1516	-1	SPAC10F6.13c	SPNCRNA.726	8113	6639	4296	6333	7.79545	7.79799	6.83135	6.87089	6406	4603.76	8208.23	1.78294	0.834258	1.4048e-14	1.6452e-13	NA	NA	0	0	0	0	0	0	0	0	0	0	1
I	1232262	1234076	1815	-1	SPAC10F6.14c	SPNCRNA.726	2928	2235	2991	4047	6.06543	5.9676	6.04929	5.96515	2966.34	3071.86	2860.81	0.931295	-0.10269	0.406964	0.595102	NA	NA	0	0	0	0	0	0	0	0	0	0	1
I	1235569	1238775	3207	-1	SPNCRNA.728	c("SPAC10F6.15", "SPNCRNA.729", "SPNCRNA.432")	877	750	476	645	3.50491	3.57104	2.57644	2.49442	698.452	489.217	907.688	1.85539	0.891724	3.79711e-10	3.11555e-09	NA	NA	0	0	0	0	0	0	0	0	0	0	1
I	1239971	1241970	2000	-1	SPAC10F6.17c	SPAC10F6.16	2921	2281	2437	3478	5.92195	5.85697	5.61374	5.60652	2727.88	2569.4	2886.35	1.12336	0.167815	0.135184	0.253238	NA	NA	0	0	0	0	0	0	0	0	0	0	1
I	1242020	1243240	1221	-1	SPAC56E4.02c	NULL	307	197	202	356	3.38373	3.0355	2.73299	3.03015	257.16	237.914	276.406	1.16179	0.216349	0.320413	0.500227	NA	NA	0	0	0	0	0	0	0	0	0	0	1
I	1245716	1253559	7844	-1	SPAC56E4.04c	SPAC56E4.03	33237	26281	61207	82827	7.5778	7.53085	8.41186	8.3279	47957.1	62865.6	33048.6	0.525702	-0.927683	3.87098e-19	5.71553e-18	NA	NA	0	0	0	0	0	0	0	0	0	0	1
I	1256376	1258787	2412	-1	SPAC56E4.06c	c("SPAC56E4.05", "SPAC56E4.07")	1479	1106	1594	2161	4.66988	4.54242	4.73105	4.64974	1534.62	1638.65	1430.59	0.873028	-0.195901	0.128104	0.242129	NA	NA	0	0	0	0	0	0	0	0	0	0	1
I	1260290	1262985	2696	-1	SPAC1420.01c	SPAC56E4.07	3538	2611	4763	6915	5.79188	5.64536	6.17396	6.19146	4232.65	5065.02	3400.29	0.671328	-0.574911	1.91402e-07	1.14937e-06	NA	NA	0	0	0	0	0	0	0	0	0	0	1
I	1263756	1265756	2001	-1	SPAC1420.02c	SPNCRNA.730	4168	3941	7207	9598	6.43412	6.64514	7.17731	7.07028	5948.33	7345.31	4551.35	0.619626	-0.69053	1.94433e-08	1.32688e-07	NA	NA	0	0	0	0	0	0	0	0	0	0	1
I	1267830	1270260	2431	-1	SPAC1420.04c	c("SPNCRNA.731", "SPAPB17E12.02")	5	5	5	2	-3.54975	-3.25797	-3.5966	-5.43844	4.50583	3.38006	5.63161	1.66613	0.736501	0.59124	0.765425	NA	NA	0	0	0	0	0	0	0	0	0	0	1
I	1272557	1274662	2106	-1	SPAPB17E12.04c	SPAPB17E12.03	879	705	621	857	4.23933	4.2129	3.6912	3.63554	762.129	643.959	880.299	1.36701	0.451026	0.00104602	0.00346479	NA	NA	0	0	0	0	0	0	0	0	0	0	1
I	1277120	1279149	2030	-1	SPAPB17E12.07c	SPAPB17E12.06	330	221	422	667	2.78834	2.50173	3.09626	3.23634	385.856	468.771	302.942	0.646248	-0.629839	0.000183198	0.000699017	NA	NA	0	0	0	0	0	0	0	0	0	0	1
I	1280495	1282878	2384	-1	SPAPB17E12.10c	SPAPB17E12.09	444	390	432	614	3.08775	3.19248	3.00137	2.98821	460.284	454.537	466.03	1.02529	0.0360272	0.874092	0.973435	NA	NA	0	0	0	0	0	0	0	0	0	0	1
I	1284397	1285586	1190	-1	SPAPB17E12.12c	SPAPB17E12.11	242	217	282	517	3.0776	3.21211	3.25144	3.60554	298.155	339.507	256.803	0.756399	-0.402781	0.0458889	0.102047	NA	NA	0	0	0	0	0	0	0	0	0	0	1
I	1285525	1289315	3791	-1	SPAPB17E12.14c	SPAPB17E12.13	1958	1274	2028	2962	4.42229	4.09409	4.42611	4.45226	1968.54	2163.12	1773.95	0.820091	-0.286145	0.0315291	0.0734762	NA	NA	0	0	0	0	0	0	0	0	0	0	1
I	1292405	1293926	1522	-1	SPAC1565.02c	SPAC1565.01	725	562	723	951	4.36557	4.28997	4.31473	4.18982	723.144	732.506	713.783	0.97444	-0.0373552	0.857702	0.962409	NA	NA	0	0	0	0	0	0	0	0	0	0	1
I	1294072	1294990	919	-1	SPNCRNA.733	SPAC1565.03	77	64	89	113	1.79835	1.82338	1.96044	1.78453	83.6002	88.6725	78.528	0.885596	-0.175279	0.599052	0.771652	NA	NA	0	0	0	0	0	0	0	0	0	0	1
I	1295316	1296634	1319	-1	SPAC1565.04c	SPAC1565.03	224	165	532	820	3.00169	2.85247	4.20276	4.30659	399.182	583.278	215.086	0.368754	-1.43927	2.16768e-17	2.9909e-16	NA	NA	0	0	0	0	0	0	0	0	0	0	1
I	1299707	1301178	1472	-1	SPAC1565.06c	SPAC1565.05	899	700	808	1204	4.96608	4.89692	4.76525	4.8203	878.843	870.628	887.058	1.01887	0.0269735	0.86469	0.967448	NA	NA	0	0	0	0	0	0	0	0	0	0	1
I	1301297	1305977	4681	-1	SPAC1565.07c	SPNCRNA.169	1158	865	1549	2320	3.37206	3.24301	3.74491	3.80733	1396.46	1673.42	1119.49	0.668984	-0.579957	2.62095e-06	1.34166e-05	NA	NA	0	0	0	0	0	0	0	0	0	0	1
I	1313236	1314511	1276	-1	SPAC6F12.03c	SPAC6F12.02	218	146	188	291	2.82626	2.53971	2.56581	2.67573	203.351	206.572	200.129	0.968811	-0.0457134	0.8624	0.966232	NA	NA	0	0	0	0	0	0	0	0	0	0	1
I	1314924	1315020	97	-1	SPATRNAPRO.02	NULL	180	165	305	584	6.26743	6.43371	6.98138	7.39818	284.811	376.344	193.278	0.513567	-0.961377	0.000587533	0.00204546	NA	NA	0	0	0	0	0	0	0	0	0	0	1
I	1316981	1320472	3492	-1	SPAC6F12.05c	SPAC6F12.06	1084	966	1528	1966	3.6878	3.81334	4.13622	3.97948	1339.22	1531.94	1146.51	0.748408	-0.418103	0.000760178	0.00258577	NA	NA	0	0	0	0	0	0	0	0	0	0	1
I	1321922	1324634	2713	-1	SPAC6F12.08c	c("SPAC6F12.07", "SPAC6F12.09")	610	506	822	1082	3.33066	3.3528	3.71413	3.59026	727.28	833.095	621.466	0.745973	-0.422806	0.00284936	0.00860688	NA	NA	0	0	0	0	0	0	0	0	0	0	1
I	1329091	1333409	4319	-1	SPAC6F12.10c	SPNCRNA.734	19224	15481	26328	40163	7.52962	7.50903	7.93646	8.02536	24001.8	28711.8	19291.8	0.671911	-0.573658	1.72153e-08	1.18731e-07	NA	NA	0	0	0	0	0	0	0	0	0	0	1
I	1333347	1335669	2323	-1	SPAC6F12.11c	SPAC6F12.12	986	853	1214	1793	4.20784	4.29061	4.46109	4.50334	1164.44	1302.21	1026.67	0.788408	-0.342986	0.00514041	0.0146918	NA	NA	0	0	0	0	0	0	0	0	0	0	1
I	1338365	1339942	1578	-1	SPAC6F12.13c	SPAC6F12.12	8929	7572	11759	16328	8.26495	8.31894	8.61529	8.56851	10715.9	12230.6	9201.1	0.752299	-0.410622	7.78617e-05	0.000316939	NA	NA	0	0	0	0	0	0	0	0	0	0	1
I	1342057	1344857	2801	-1	SPAC6F12.15c	c("SPAC6F12.14", "SPNCRNA.735")	922	768	968	1368	3.82965	3.8578	3.85303	3.83166	978.483	1015.62	941.344	0.926866	-0.109567	0.388892	0.575263	NA	NA	0	0	0	0	0	0	0	0	0	0	1
I	1344924	1348614	3691	-1	SPAC6F12.16c	SPNCRNA.735	2855	1660	3367	4672	5.0298	4.53931	5.22092	5.17313	2981.42	3500.85	2461.99	0.703255	-0.50788	0.00987167	0.0263978	NA	NA	0	0	0	0	0	0	0	0	0	0	1
I	1351565	1353770	2206	-1	SPAC19E9.01c	NULL	2943	2089	2584	3500	5.91913	5.71647	5.68459	5.60198	2715.69	2655.22	2776.17	1.04555	0.0642616	0.476512	0.663887	NA	NA	0	0	0	0	0	0	0	0	0	0	1
I	1356930	1359496	2567	-1	SPNCRNA.736	c("SPAC19E9.02", "SPNCRNA.737")	475	512	326	401	2.9414	3.34143	2.35149	2.12986	439.192	320.045	558.338	1.74456	0.802864	0.0102838	0.0274021	NA	NA	0	0	0	0	0	0	0	0	0	0	1
I	1357811	1358292	482	-1	SPNCRNA.86	SPNCRNA.737	134	168	91	96	3.52869	4.14673	2.92354	2.48034	127.919	83.4685	172.37	2.06509	1.04621	0.0340798	0.0784156	NA	NA	0	0	0	0	0	0	0	0	0	0	1
I	1359979	1360931	953	-1	SPNCRNA.738	NULL	15	11	18	35	-0.613935	-0.769578	-0.39776	0.0412306	18.3897	22.4073	14.3721	0.641403	-0.640698	0.308764	0.486469	NA	NA	0	0	0	0	0	0	0	0	0	0	1
I	1368512	1369068	557	-1	SPNCRNA.739	SPAC57A10.03	60	50	19	22	2.16084	2.18962	0.455033	0.146177	39.7102	18.1479	61.2725	3.37628	1.75544	7.06525e-05	0.000289162	NA	NA	0	0	0	0	0	0	0	0	0	0	1
I	1371478	1372516	1039	-1	SPAC57A10.14	SPAC57A10.04	502	367	666	847	4.79628	4.63619	5.15726	4.98374	572.169	664.066	480.272	0.723229	-0.467475	0.00268711	0.00816195	NA	NA	0	0	0	0	0	0	0	0	0	0	1
I	1372722	1376240	3519	-1	SPAC57A10.05c	NULL	2423	1668	2159	2965	4.83711	4.59025	4.62383	4.56113	2243.2	2233.48	2252.92	1.0087	0.0124985	0.79478	0.921065	NA	NA	0	0	0	0	0	0	0	0	0	0	1
I	1378475	1379898	1424	-1	SPAC57A10.08c	SPAC57A10.07	157	106	128	170	2.28965	2.01476	1.94817	1.8372	137.476	130.285	144.668	1.1104	0.151073	0.482995	0.670119	NA	NA	0	0	0	0	0	0	0	0	0	0	1
I	1380312	1381558	1247	-1	SPAC57A10.09c	NULL	2123	1778	2530	3944	6.65423	6.6902	6.86041	6.98057	2481.9	2790.2	2173.6	0.77901	-0.360285	0.00101781	0.00337696	NA	NA	0	0	0	0	0	0	0	0	0	0	1
I	1382408	1383592	1185	-1	SPAC57A10.10c	NULL	5916	4709	10158	13793	7.78955	7.75216	8.52261	8.44357	8176.32	10450.5	5902.09	0.564764	-0.824279	1.25409e-14	1.47879e-13	NA	NA	0	0	0	0	0	0	0	0	0	0	1
I	1383532	1385287	1756	-1	SPAC57A10.11c	NULL	2306	2075	2285	3045	5.82556	5.9651	5.76551	5.65939	2390.59	2329.56	2451.61	1.05239	0.0736724	0.550228	0.732499	NA	NA	0	0	0	0	0	0	0	0	0	0	1
I	1385357	1387063	1707	-1	SPAC57A10.12c	NULL	17107	13988	27016	35488	8.70054	8.70195	9.31291	9.18606	22327.3	27353.7	17300.9	0.632489	-0.660888	2.50044e-10	2.08729e-09	NA	NA	0	0	0	0	0	0	0	0	0	0	1
I	1393082	1393528	447	-1	SPNCRNA.58	NULL	181	109	146	161	4.0712	3.63135	3.71432	3.33505	147.471	136.487	158.455	1.16096	0.215317	0.330977	0.512519	NA	NA	0	0	0	0	0	0	0	0	0	0	1
I	1395770	1398272	2503	-1	SPAC20G8.04c	SPAC20G8.03	5610	5314	4523	5428	6.53983	6.75344	6.18225	5.92503	5261.22	4390.45	6131.99	1.39666	0.481985	0.0127249	0.0331271	NA	NA	0	0	0	0	0	0	0	0	0	0	1
I	1399200	1402965	3766	-1	SPAC20G8.05c	SPNCRNA.740	3600	2920	4010	5428	5.43229	5.42208	5.54104	5.4575	3872.57	4119.24	3625.9	0.880236	-0.184038	0.10052	0.198691	NA	NA	0	0	0	0	0	0	0	0	0	0	1
I	1410106	1411256	1151	-1	SPAC20G8.07c	NULL	2511	1941	1776	2980	6.50086	6.42121	5.95437	6.18069	2252.61	2036.52	2468.71	1.21222	0.27765	0.0234333	0.056827	NA	NA	0	0	0	0	0	0	0	0	0	0	1
I	1411624	1415165	3542	-1	SPAC20G8.08c	NULL	1890	1339	2519	3581	4.53856	4.33314	4.90617	4.89331	2215.97	2650.69	1781.24	0.671993	-0.573482	1.21355e-06	6.48882e-06	NA	NA	0	0	0	0	0	0	0	0	0	0	1
I	1415452	1418825	3374	-1	SPAC20G8.09c	NULL	5888	4257	10816	15378	6.2253	6.04917	7.05576	7.0431	8492.67	11382.2	5603.15	0.492273	-1.02247	1.75431e-21	2.84962e-20	NA	NA	0	0	0	0	0	0	0	0	0	0	1
I	1418900	1420497	1598	-1	SPAC20G8.10c	NULL	315	266	347	519	3.03264	3.08053	3.12537	3.18581	349.248	374.609	323.888	0.864604	-0.209888	0.20003	0.347038	NA	NA	0	0	0	0	0	0	0	0	0	0	1
I	1423029	1424169	1141	-1	SPAC3A12.03c	NULL	554	458	539	811	4.33314	4.35042	4.24669	4.31574	573.551	583.664	563.437	0.965345	-0.0508827	0.685353	0.847182	NA	NA	0	0	0	0	0	0	0	0	0	0	1
I	1424697	1425562	866	-1	SPAC3A12.04c	NULL	373	328	502	686	4.45091	4.55725	4.83257	4.76273	454.9	518.063	391.738	0.756158	-0.403241	0.0101588	0.0270871	NA	NA	0	0	0	0	0	0	0	0	0	0	1
I	1426054	1429956	3903	-1	SPAC3A12.05c	NULL	2534	2071	3953	5577	4.82121	4.82194	5.41589	5.39207	3353.04	4143.98	2562.1	0.618269	-0.693692	4.57265e-10	3.71884e-09	NA	NA	0	0	0	0	0	0	0	0	0	0	1
I	1430099	1432875	2777	-1	SPAC3A12.06c	NULL	1060	791	1263	1855	3.98602	3.85552	4.19196	4.22616	1187.6	1350.95	1024.25	0.758168	-0.39941	0.00170576	0.00540691	NA	NA	0	0	0	0	0	0	0	0	0	0	1
I	1432773	1433415	643	-1	SPAC3A12.19	NULL	237	200	366	599	4.04023	4.08715	4.62033	4.81068	328.861	414.119	243.603	0.588245	-0.765511	8.61889e-06	4.06208e-05	NA	NA	0	0	0	0	0	0	0	0	0	0	1
I	1435842	1437837	1996	-1	SPAC3A12.09c	SPAC3A12.08	526	407	629	854	3.45151	3.37329	3.66265	3.58346	582.239	647.083	517.395	0.79958	-0.322686	0.0335012	0.0772619	NA	NA	0	0	0	0	0	0	0	0	0	0	1
I	1437858	1438678	821	-1	SPNCRNA.741	SPAC3A12.10	8	5	4	3	-1.30572	-1.69197	-2.35254	-3.28787	5.16911	3.21968	7.11854	2.21094	1.14466	0.358967	0.543599	NA	NA	0	0	0	0	0	0	0	0	0	0	1
I	1439245	1440658	1414	-1	SPAC3A12.11c	NULL	1225	1127	1529	2364	5.2776	5.44912	5.55055	5.65883	1498.5	1679.05	1317.94	0.784929	-0.349366	0.00221794	0.00684954	NA	NA	0	0	0	0	0	0	0	0	0	0	1
I	1441967	1443260	1294	-1	SPAC3A12.13c	SPAC3A12.12	3186	2834	4696	6549	6.72415	6.84706	7.23698	7.19646	4130.63	4894.79	3366.46	0.687764	-0.540014	5.63521e-07	3.15951e-06	NA	NA	0	0	0	0	0	0	0	0	0	0	1
I	1449398	1449469	72	-1	SPATRNAPRO.03	NULL	1	1	0	0	-0.794415	-0.502606	-16.6096	-16.6096	0.563161	0	1.12632	Inf	Inf	0.69034	0.850227	NA	NA	0	0	0	0	0	0	0	0	0	0	1
I	1449927	1451399	1473	-1	SPAC3A12.16c	SPSNORNA.48	735	597	1304	1794	4.44691	4.43871	5.22718	5.16705	1045.49	1350.16	740.813	0.548685	-0.86595	3.60735e-11	3.22192e-10	NA	NA	0	0	0	0	0	0	0	0	0	0	1
I	1451843	1453348	1506	-1	SPAC3A12.17c	NULL	1502	1037	1600	2418	5.37165	5.12899	5.41598	5.49136	1567.47	1736.48	1398.47	0.805348	-0.312316	0.0114691	0.0301457	NA	NA	0	0	0	0	0	0	0	0	0	0	1
I	1456798	1457906	1109	-1	SPAC9.02c	SPAC3A12.18	1835	1451	1773	2617	6.23406	6.18714	6.13761	6.17897	1862.93	1901.24	1824.62	0.959702	-0.0593416	0.594567	0.767026	NA	NA	0	0	0	0	0	0	0	0	0	0	1
I	1458445	1465300	6856	-1	SPAC9.03c	NULL	8485	5565	11582	17113	5.68303	5.36631	6.08507	6.12792	10070.7	12426.2	7715.26	0.620887	-0.687597	1.59121e-10	1.34703e-09	NA	NA	0	0	0	0	0	0	0	0	0	0	1
I	1473457	1474671	1215	-1	SPAC9.06c	SPAC9.05	86	61	123	237	1.87991	1.6762	2.34931	2.77517	116.708	152.319	81.0967	0.532415	-0.909377	0.00133906	0.00434904	NA	NA	0	0	0	0	0	0	0	0	0	0	1
I	1474765	1476147	1383	-1	SPAC9.07c	SPAC9.05	3291	2894	4753	7321	6.73224	6.8386	7.2157	7.31854	4332.81	5209.27	3456.35	0.6635	-0.591832	2.4172e-08	1.63471e-07	NA	NA	0	0	0	0	0	0	0	0	0	0	1
I	1476887	1478399	1513	-1	SPAC9.08c	c("SPNCRNA.742", "SPAC9.09")	305	197	544	846	3.06496	2.72616	3.8529	3.96958	437.307	599.198	275.415	0.459639	-1.12143	8.84019e-12	8.42204e-11	NA	NA	0	0	0	0	0	0	0	0	0	0	1
I	1481083	1482570	1488	-1	SPNCRNA.743	c("SPAC9.09", "SPAC9.10", "SPNCRNA.171")	77	60	69	78	1.10312	1.03504	0.898002	0.554519	70.6065	65.2078	76.0053	1.16559	0.221055	0.45739	0.644654	NA	NA	0	0	0	0	0	0	0	0	0	0	1
I	1484979	1485061	83	-1	SPATRNAMET.02	NULL	254	356	331	465	6.98913	7.76799	7.32428	7.29431	348.338	346.261	350.415	1.012	0.0172067	0.934974	1	NA	NA	0	0	0	0	0	0	0	0	0	0	1
I	1486827	1488388	1562	-1	SPAC9.12c	SPAC9.11	353	267	386	538	3.27581	3.1648	3.35789	3.31653	372.789	402.225	343.353	0.853634	-0.22831	0.190669	0.333594	NA	NA	0	0	0	0	0	0	0	0	0	0	1
I	1488610	1489774	1165	-1	SPAC9.13c	NULL	788	619	991	1455	4.81142	4.75498	5.09526	5.12896	920.39	1059.82	780.957	0.736874	-0.440509	0.000863912	0.00290244	NA	NA	0	0	0	0	0	0	0	0	0	0	1
I	1490050	1492204	2155	-1	SPAC5D6.13	NULL	1701	1196	2275	3317	5.03418	4.81783	5.40681	5.43046	2010.92	2424.46	1597.38	0.658862	-0.601953	4.25508e-07	2.42586e-06	NA	NA	0	0	0	0	0	0	0	0	0	0	1
I	1492307	1495689	3383	-1	SPAC5D6.12	c("SPAC5D6.10c", "SPAC5D6.09c")	1839	1509	2212	3179	4.4961	4.50259	4.71568	4.71854	2101.75	2340.32	1863.18	0.796122	-0.328938	0.00420076	0.012284	NA	NA	0	0	0	0	0	0	0	0	0	0	1
I	1503761	1504864	1104	-1	SPAC5D6.05	NULL	660	545	1216	1758	4.93445	4.95006	5.7692	5.78063	980.611	1290.38	670.845	0.519883	-0.943742	7.84542e-13	8.12566e-12	NA	NA	0	0	0	0	0	0	0	0	0	0	1
I	1505088	1507648	2561	-1	SPAC5D6.04	NULL	2270	1833	1833	2752	5.33229	5.31561	4.97694	5.04286	2131.91	1982.68	2281.14	1.15054	0.202306	0.0940106	0.187677	NA	NA	0	0	0	0	0	0	0	0	0	0	1
I	1511592	1512406	815	-1	SPAC5D6.01	SPAC5D6.02c	1848	1548	3529	5179	6.84353	6.87978	7.72997	7.76302	2832.73	3773.23	1892.24	0.501491	-0.995704	1.1856e-18	1.72091e-17	NA	NA	0	0	0	0	0	0	0	0	0	0	1
[truncated: 10,387 more rows]

## Sheet: Up-DBR1
No Fold-Change-Cutoff UP Genes	No Fold-Change-Cutoff UP Introns	With Fold-Change-Cutoff UP Genes	With Fold-Change-Cutoff UP Introns
SPAC1F8.05	SPAC13G6.04_intron1	SPAC1F8.05	SPAC13G6.04_intron1
SPAC1F8.06	SPAC13G6.04_intron2	SPAC11D3.09	SPAC13G6.04_intron2
SPAC11D3.09	SPAC13G6.09_intron1	SPAC5H10.04	SPAC13G6.09_intron1
SPNCRNA.609	SPAC1F5.03c_intron1	SPAC5H10.11	SPAC1F5.03c_intron1
SPNCRNA.613	SPAC18B11.09c_intron1	SPNCRNA.633	SPAC18B11.09c_intron1
SPAC5H10.03	SPAC18B11.08c_intron1	SPNCRNA.637	SPAC18B11.08c_intron1
SPAC5H10.04	SPAC18B11.07c_intron2	SPAC13C5.07	SPAC18B11.07c_intron2
SPAC5H10.10	SPAC18B11.07c_intron3	SPNCRNA.653	SPAC18B11.07c_intron3
SPAC5H10.11	SPAC12G12.11c_intron2	SPSNORNA.04	SPAC12G12.11c_intron2
SPNCRNA.622	SPAC630.03_intron3	SPNCRNA.690	SPAC630.03_intron3
SPAC806.07	SPAC630.11_intron1	SPAC139.05	SPAC630.11_intron1
SPNCRNA.633	SPAC630.11_intron3	SPNCRNA.717	SPAC630.11_intron3
SPNCRNA.637	SPAC630.11_intron4	SPNCRNA.719	SPAC630.11_intron4
SPAC13C5.03	SPAC1751.04_intron1	SPNCRNA.726	SPAC1751.04_intron1
SPAC13C5.07	SPAC1751.04_intron2	SPNCRNA.729	SPAC1751.04_intron2
SPNCRNA.653	SPAC1751.03_intron2	SPAC56E4.03	SPAC1751.03_intron2
SPNCRNA.551	SPAC31A2.02_intron2	SPNCRNA.730	SPAC31A2.02_intron2
SPAC227.14	SPAC31A2.10_intron2	SPNCRNA.735	SPAC31A2.10_intron2
SPSNORNA.04	SPAC31A2.10_intron3	SPAC19E9.03	SPAC31A2.10_intron3
SPAC3H8.04	SPAC13C5.03_intron2	SPAC57A10.06	SPAC13C5.03_intron2
SPAC1D4.08	SPAC227.09_intron1	SPNCRNA.742	SPAC227.09_intron1
SPNCRNA.690	SPAC2F7.15_intron1	SPAC167.06c	SPAC2F7.15_intron1
SPAC521.03	SPAC2F7.17_intron1	SPNCRNA.555	SPAC2F7.17_intron1
SPNCRNA.697	SPAC2F7.17_intron2	SPAC23H4.05c	SPAC2F7.17_intron2
SPAC821.11	SPAC13A11.03_intron1	SPAC343.07	SPAC13A11.03_intron1
SPAC139.05	SPAC3H8.03_intron1	SPNCRNA.556	SPAC3H8.03_intron1
SPNCRNA.712	SPAC3H8.10_intron2	SPAC1002.19	SPAC3H8.10_intron2
SPNCRNA.717	SPAC1F3.05_intron3	SPNCRNA.779	SPAC1F3.05_intron3
SPNCRNA.719	SPAC1F3.09_intron2	SPNCRNA.781	SPAC1F3.09_intron2
SPNCRNA.724	SPAC1F3.09_intron4	SPNCRNA.791	SPAC1F3.09_intron4
SPAC10F6.06	SPAC1D4.08_intron1	SPNCRNA.802	SPAC1D4.08_intron1
SPNCRNA.726	SPAC22F3.10c_intron1	SPNCRNA.188	SPAC22F3.10c_intron1
SPNCRNA.729	SPAC22F3.09c_intron1	SPAC4G9.07	SPAC22F3.09c_intron1
SPAC56E4.03	SPAC22F3.07c_intron1	SPAC6B12.16	SPAC22F3.07c_intron1
SPNCRNA.730	SPAC22F3.15_intron1	SPAC25H1.09	SPAC22F3.15_intron1
SPSNORNA.53	SPAC22F3.05c_intron2	SPNCRNA.836	SPAC22F3.05c_intron2
SPNCRNA.735	SPAC22F3.05c_intron3	SPNCRNA.847	SPAC22F3.05c_intron3
SPAC19E9.03	SPAC1296.02_intron1	SPAC513.02	SPAC1296.02_intron1
SPAC57A10.06	SPAC1296.04_intron2	SPNCRNA.867	SPAC1296.04_intron2
SPNCRNA.742	SPAC22G7.04_intron3	SPNCRNA.31	SPAC22G7.04_intron3
SPAC167.06c	SPAC22G7.05_intron1	SPAPB1A11.01	SPAC22G7.05_intron1
SPNCRNA.555	SPNCRNA.159_intron2	SPAPB1A11.02	SPNCRNA.159_intron2
SPAC23H4.05c	SPAC4G8.08_intron2	SPAPB1A11.03	SPAC4G8.08_intron2
SPNCRNA.746	SPAC2G11.06_intron2	SPNCRNA.71	SPAC2G11.06_intron2
SPAC343.07	SPAC23G3.06_intron2	SPAC31G5.21	SPAC23G3.06_intron2
SPAC343.21	SPAC23G3.11_intron1	SPNCRNA.886	SPAC23G3.11_intron1
SPAC343.12	SPAC22H12.02_intron1	SPNCRNA.887	SPAC22H12.02_intron1
SPNCRNA.556	SPAC1687.11_intron3	SPNCRNA.889	SPAC1687.11_intron3
SPNCRNA.763	SPAC1687.15_intron2	SPATRNATHR.04	SPAC1687.15_intron2
SPAC1002.19	SPAC1687.21_intron1	SPAC3A11.10c	SPAC1687.21_intron1
SPAPB1A10.05	SPAC1687.21_intron2	SPNCRNA.936	SPAC1687.21_intron2
SPAPB1A10.08	SPAC1687.21_intron3	SPAC4H3.08	SPAC1687.21_intron3
SPNCRNA.779	SPAC222.09_intron1	SPAC21E11.04	SPAC222.09_intron1
SPNCRNA.781	SPAC222.15_intron1	SPNCRNA.978	SPAC222.15_intron1
SPNCRNA.791	SPAC222.18_intron1	SPNCRNA.986	SPAC222.18_intron1
SPAC25A8.02	SPAC821.05_intron2	SPNCRNA.987	SPAC821.05_intron2
SPAC20H4.02	SPAC821.06_intron3	SPNCRNA.990	SPAC821.06_intron3
SPAC23C11.10	SPAC821.12_intron1	SPAC637.03	SPAC821.12_intron1
SPNCRNA.802	SPAC139.06_intron3	SPNCRNA.1023	SPAC139.06_intron3
SPNCRNA.188	SPAC23C4.08_intron2	SPAC11H11.04	SPAC23C4.08_intron2
SPAC13D6.01	SPAC23C4.11_intron2	SPATRNAALA.06	SPAC23C4.11_intron2
SPAC4G9.07	SPAC23C4.12_intron1	SPNCRNA.1030	SPAC23C4.12_intron1
SPAC4G9.10	SPAC23C4.12_intron2	SPAC4F10.17	SPAC23C4.12_intron2
SPAC4G9.19	SPAC23C4.15_intron2	SPAPB8E5.10	SPAC23C4.15_intron2
SPAC6C3.05	SPAC23C4.17_intron2	SPNCRNA.1036	SPAC23C4.17_intron2
SPAC17G8.07	SPAC30D11.06c_intron2	SPNCRNA.1044	SPAC30D11.06c_intron2
SPAC22H10.13	SPAC56F8.08_intron1	SPAC29A4.12c	SPAC56F8.08_intron1
SPAC6B12.13	SPAC56F8.11_intron1	SPAPJ691.02	SPAC56F8.11_intron1
SPAC6B12.16	SPAC4C5.01_intron3	SPNCRNA.1078	SPAC4C5.01_intron3
SPAC25H1.09	SPAC10F6.10_intron1	SPAC3G6.07	SPAC10F6.10_intron1
SPNCRNA.834	SPAC10F6.10_intron2	SPAC29B12.12	SPAC10F6.10_intron2
SPAC4A8.04	SPAC10F6.16_intron2	SPAC186.06	SPAC10F6.16_intron2
SPNCRNA.836	SPAPB17E12.11_intron3	SPAC977.18	SPAPB17E12.11_intron3
SPAC823.03	SPAPB17E12.13_intron1	SPAPJ695.02	SPAC6F12.07_intron1
SPAPB2B4.02	SPAC6F12.07_intron1	SPNCRNA.606	SPAC6F12.07_intron3
SPNCRNA.847	SPAC6F12.07_intron3	SPAC11D3.01c	SPAC6F12.12_intron3
SPNCRNA.848	SPAC6F12.12_intron3	SPNCRNA.638	SPAC6F12.14_intron1
SPNCRNA.205	SPAC6F12.14_intron1	SPNCRNA.643	SPAC19E9.02_intron1
SPACUNK4.16c	SPAC19E9.02_intron1	SPNCRNA.654	SPAC57A10.03_intron3
SPAC513.02	SPAC57A10.03_intron3	SPAC2F7.06c	SPAC3A12.02_intron1
SPAC2E1P3.01	SPAC3A12.02_intron1	SPNCRNA.670	SPAC3A12.18_intron1
SPAC2E1P3.04	SPAC3A12.14_intron1	SPNCRNA.673	SPAC1705.02_intron1
SPNCRNA.867	SPAC3A12.18_intron1	SPAC22F3.04	SPAC1705.02_intron2
SPNCRNA.31	SPAC1705.02_intron1	SPAC22F3.02	SPAC23H4.18c_intron1
SPAPB1A11.01	SPAC1705.02_intron2	SPNCRNA.678	SPAC23H4.18c_intron2
SPAPB1A11.02	SPAC23H4.18c_intron1	SPNCRNA.691	SPAC23H4.16c_intron2
SPAPB1A11.03	SPAC23H4.18c_intron2	SPNCRNA.716	SPAC23H4.13c_intron1
SPNCRNA.71	SPAC23H4.16c_intron2	SPNCRNA.739	SPAC23H4.03c_intron1
SPAC31G5.21	SPAC23H4.13c_intron1	SPNCRNA.745	SPAP27G11.12_intron1
SPAC24C9.08	SPAC23H4.03c_intron1	SPNCRNA.750	SPAP27G11.12_intron2
SPNCRNA.885	SPAP27G11.12_intron1	SPAC1002.17c	SPAC343.03_intron2
SPNCRNA.886	SPAP27G11.12_intron2	SPNCRNA.765	SPAC824.07_intron1
SPNCRNA.887	SPAC343.03_intron2	SPNCRNA.767	SPAC17A5.08_intron1
SPNCRNA.889	SPAC824.07_intron1	SPNCRNA.780	SPAC17A5.13_intron2
SPAC688.16	SPAC17A5.08_intron1	SPAC3C7.14c	SPAC17A5.16_intron6
SPATRNATHR.04	SPAC17A5.13_intron2	SPNCRNA.795	SPAC1002.01_intron1
SPAC3A11.10c	SPAC17A5.16_intron6	SPAC13G7.02c	SPAC1399.05c_intron1
SPAC328.09	SPAC1002.01_intron1	SPAC6B12.03c	SPAPB1A10.15_intron1
SPAC16E8.16	SPAC1399.05c_intron1	SPNCRNA.825	SPAC110.03_intron1
SPNCRNA.920	SPAPB1A10.15_intron1	SPAC23H3.15c	SPAC110.03_intron2
SPATRNALEU.03	SPAC110.03_intron1	SPNCRNA.850	SPAP14E8.02_intron1
SPAC17G6.13	SPAC110.03_intron2	SPAC8F11.05c	SPAC9G1.04_intron2
SPAC15A10.01	SPAP14E8.02_intron1	SPNCRNA.56	SPAC9G1.05_intron4
SPAC15E1.10	SPAC9G1.04_intron2	SPAC2E1P3.02c	SPAC17H9.07_intron2
SPNCRNA.936	SPAC9G1.05_intron4	SPNCRNA.860	SPAC607.05_intron1
SPAC4H3.08	SPAC17H9.07_intron2	SPNCRNA.863	SPAC732.01_intron5
SPAC4H3.09	SPAC607.05_intron1	SPNCRNA.868	SPAC631.02_intron1
SPAC1071.11	SPAC732.01_intron5	SPNCRNA.869	SPAC20H4.07_intron1
SPAC2F3.08	SPAC631.02_intron1	SPNCRNA.875	SPAC23C11.01_intron4
SPNCRNA.953	SPAC20H4.07_intron1	SPNCRNA.888	SPAC23C11.08_intron1
SPAC19G12.09	SPAC23C11.01_intron4	SPNCRNA.890	SPAC23C11.08_intron2
SPSNORNA.13	SPAC23C11.08_intron1	SPNCRNA.908	SPAC23C11.08_intron3
SPNCRNA.966	SPAC23C11.08_intron2	SPNCRNA.919	SPAC23C11.10_intron2
SPAC25B8.10	SPAC23C11.08_intron3	SPAC15E1.02c	SPAC23C11.10_intron3
SPAC25B8.18	SPAC23C11.10_intron2	SPNCRNA.931	SPAC23C11.11_intron2
SPNCRNA.969	SPAC23C11.10_intron3	SPAC4H3.03c	SPAC23C11.17_intron1
SPAC21E11.04	SPAC23C11.11_intron2	SPNCRNA.952	SPAC18G6.03_intron2
SPNCRNA.98	SPAC23C11.17_intron1	SPNCRNA.955	SPAC4G9.14_intron2
SPAC2C4.08	SPAC18G6.03_intron2	SPNCRNA.959	SPAC4G9.14_intron3
SPNCRNA.974	SPAC4G9.14_intron2	SPAC21E11.03c	SPAC13G7.11_intron2
SPNCRNA.978	SPAC4G9.14_intron3	SPAC27F1.05c	SPAC6C3.04_intron1
SPAC29E6.08	SPAC13G7.11_intron2	SPAC27D7.09c	SPAC6C3.08_intron1
SPNCRNA.986	SPAC6C3.04_intron1	SPNCRNA.998	SPAC6C3.09_intron3
SPNCRNA.987	SPAC6C3.08_intron1	SPNCRNA.563	SPAC17G8.15_intron1
SPNCRNA.990	SPAC6C3.09_intron3	SPNCRNA.1001	SPAC17G8.15_intron2
SPAC17C9.11c	SPAC17G8.15_intron1	SPNCRNA.1005	SPAC17G8.09_intron1
SPNCRNA.992	SPAC17G8.15_intron2	SPNCRNA.1017	SPAC22H10.02_intron2
SPAC637.03	SPAC17G8.09_intron1	SPAC458.04c	SPAC22H10.04_intron2
SPNCRNA.1003	SPAC22H10.02_intron2	SPNCRNA.1025	SPAC6B12.08_intron1
SPAC1635.01	SPAC22H10.04_intron2	SPNCRNA.1033	SPAC6B12.13_intron1
SPAC458.06	SPAC6B12.08_intron1	SPAC1B3.16c	SPAC6B12.15_intron1
SPNCRNA.1023	SPAC6B12.13_intron1	SPAC1250.02	SPAC32A11.01_intron2
SPAC11H11.04	SPAC6B12.15_intron1	SPNCRNA.1050	SPAC23H3.14_intron2
SPAC22F8.05	SPAC32A11.01_intron2	SPNCRNA.1051	SPAC4A8.10_intron2
SPAC22F8.06	SPAC23H3.14_intron2	SPSNORNA.16	SPAC4A8.14_intron1
SPATRNAALA.06	SPAC4A8.10_intron2	SPAP8A3.04c	SPAC823.02_intron1
SPNCRNA.1027	SPAC4A8.14_intron1	SPNCRNA.1071	SPAC823.03_intron1
SPAC4F10.08	SPAC823.02_intron1	SPNCRNA.1082	SPAC823.14_intron2
SPNCRNA.1030	SPAC823.03_intron1	SPNCRNA.1083	SPAC823.15_intron1
SPNCRNA.1031	SPAC823.14_intron2	SPAC186.02c	SPAC7D4.02c_intron1
SPAC4F10.17	SPAC823.15_intron1	SPBC1348.11	SPAC7D4.02c_intron2
SPAC4F10.20	SPAC7D4.02c_intron1	SPBPB21E7.07	SPAC4F8.14c_intron2
SPAC19B12.10	SPAC7D4.02c_intron2	SPNCRNA.1323	SPAC644.09_intron1
SPAPB8E5.10	SPAC4F8.14c_intron2	SPBC660.05	SPAC644.09_intron2
SPNCRNA.1036	SPAC644.09_intron1	SPBC1271.07c	SPAC644.15_intron1
SPNCRNA.564	SPAC644.09_intron2	SPNCRNA.1354	SPAPB2B4.02_intron1
SPNCRNA.1037	SPAC644.15_intron1	SPNCRNA.1360	SPAPB2B4.05_intron4
SPAC1006.01	SPAPB2B4.02_intron1	SPNCRNA.66	SPAC6F6.12_intron2
SPNCRNA.1044	SPAPB2B4.05_intron4	SPBC354.12	SPAC6F6.15_intron1
SPAC29A4.17c	SPAC6F6.12_intron2	SPNCRNA.319	SPAC6F6.15_intron4
SPAC29A4.12c	SPAC6F6.15_intron1	SPBC839.06	SPAC6F6.15_intron8
SPNCRNA.1049	SPAC6F6.15_intron4	SPNCRNA.1380	SPAC1805.05_intron2
SPNCRNA.1053	SPAC6F6.15_intron8	SPNCRNA.322	SPAC1805.13_intron1
SPAC26F1.04c	SPAC1805.05_intron2	SPNCRNA.1399	SPAC1805.17_intron1
SPAPJ691.02	SPAC1805.13_intron1	SPNCRNA.334	SPAC1B2.04_intron1
SPAP8A3.05	SPAC1805.17_intron1	SPNCRNA.1407	SPAC3F10.19_intron1
SPNCRNA.1078	SPAC1B2.04_intron1	SPBC409.11	SPAC3F10.19_intron2
SPAC3G6.05	SPAC3F10.19_intron1	SPBC725.03	SPAC3F10.09_intron2
SPAC3G6.07	SPAC3F10.19_intron2	SPNCRNA.1439	SPAC3F10.17_intron1
SPAC3G6.08	SPAC3F10.09_intron2	SPNCRNA.1450	SPAC8F11.04_intron1
SPAC29B12.12	SPAC3F10.17_intron1	SPBC2F12.09c	SPAC31G5.02_intron2
SPAC186.06	SPAC8F11.04_intron1	SPNCRNA.1467	SPAC24C9.08_intron1
SPAC977.18	SPAC31G5.02_intron2	SPBC28E12.02	SPAC16A10.04_intron3
SPAPJ695.02	SPAC24C9.08_intron1	SPNCRNA.1472	SPAC16A10.04_intron4
SPNCRNA.606	SPAC16A10.04_intron3	SPNCRNA.1473	SPAC589.04_intron1
SPNCRNA.607	SPAC16A10.04_intron4	SPNCRNA.1475	SPAC589.11_intron1
SPAC11D3.01c	SPAC589.04_intron1	SPNCRNA.380	SPAC589.12_intron1
SPAC5H10.06c	SPAC589.11_intron1	SPNCRNA.1478	SPAC3G9.13c_intron1
SPAC13G6.12c	SPAC589.12_intron1	SPNCRNA.1481	SPAC3G9.13c_intron2
SPAC18B11.04	SPAC3G9.13c_intron1	SPNCRNA.571	SPAC3G9.09c_intron2
SPNCRNA.638	SPAC3G9.13c_intron2	SPBP23A10.12	SPAC1486.01_intron1
SPNCRNA.643	SPAC3G9.09c_intron2	SPNCRNA.1499	SPAC1486.06_intron1
SPNCRNA.649	SPAC1486.01_intron1	SPNCRNA.1512	SPAC1486.09_intron1
SPNCRNA.652	SPAC1486.06_intron1	SPBC557.05	SPAC26A3.06_intron2
SPNCRNA.654	SPAC1486.09_intron1	SPNCRNA.1527	SPAC26A3.10_intron2
SPAC2F7.06c	SPAC26A3.06_intron2	SPNCRNA.401	SPAC8E11.07c_intron1
SPNCRNA.663	SPAC26A3.10_intron2	SPNCRNA.1542	SPAC8E11.07c_intron2
SPAC1D4.02c	SPAC8E11.07c_intron1	SPNCRNA.1553	SPAC8E11.04c_intron2
SPNCRNA.670	SPAC8E11.07c_intron2	SPNCRNA.1559	SPAC8E11.02c_intron1
SPAC1D4.05c	SPAC8E11.04c_intron2	SPNCRNA.410	SPAC959.02_intron1
SPNCRNA.673	SPAC8E11.02c_intron1	SPBP4H10.10	SPAC959.02_intron3
SPAC22F3.04	SPAC959.02_intron1	SPNCRNA.1579	SPAC3H5.08c_intron1
SPAC22F3.02	SPAC959.02_intron3	SPNCRNA.1589	SPAC3A11.14c_intron3
SPAC1296.03c	SPAC3H5.08c_intron1	SPNCRNA.417	SPAC3A11.12c_intron1
SPNCRNA.678	SPAC3A11.14c_intron3	SPBC4B4.06	SPAC3A11.05c_intron1
SPNCRNA.687	SPAC3A11.12c_intron1	SPNCRNA.421	SPAC328.05_intron2
SPAC2G11.05c	SPAC3A11.05c_intron1	SPNCRNA.1632	SPAC328.05_intron4
SPNCRNA.691	SPAC328.05_intron2	SPNCRNA.1638	SPAC328.05_intron5
SPAC1687.14c	SPAC328.05_intron4	SPBC21C3.19	SPAC328.09_intron1
SPAC222.08c	SPAC328.05_intron5	SPNCRNA.1653	SPAC16E8.01_intron1
SPAC821.04c	SPAC328.09_intron1	SPBC1347.03	SPAC16E8.03_intron1
SPAC139.02c	SPAC16E8.01_intron1	SPNCRNA.105	SPAC16E8.09_intron1
SPAC23C4.16c	SPAC16E8.03_intron1	SPBP4G3.03	SPAC16E8.15_intron2
SPNCRNA.713	SPAC16E8.09_intron1	SPBPB10D8.04c	SPAC16E8.16_intron1
SPNCRNA.716	SPAC16E8.15_intron2	SPNCRNA.1325	SPAC1B1.01_intron1
SPAC10F6.13c	SPAC16E8.16_intron1	SPNCRNA.1327	SPAC17A2.05_intron1
SPNCRNA.728	SPAC1B1.01_intron1	SPNCRNA.1328	SPAC17G6.12_intron3
SPAPB17E12.04c	SPAC17A2.05_intron1	SPNCRNA.1332	SPAC17G6.12_intron4
SPNCRNA.736	SPAC17G6.12_intron3	SPBC1773.06c	SPAC8C9.03_intron1
SPNCRNA.739	SPAC17G6.12_intron4	SPBC1773.17c	SPAC8C9.05_intron1
SPAC20G8.04c	SPAC8C9.03_intron1	SPBP26C9.02c	SPAC8C9.05_intron3
SPNCRNA.745	SPAC8C9.05_intron1	SPBC106.02c	SPAC8C9.08_intron1
SPNCRNA.747	SPAC8C9.05_intron3	SPNCRNA.1350	SPAC8C9.11_intron2
SPAP27G11.09c	SPAC8C9.08_intron1	SPNCRNA.1363	SPAC8C9.14_intron4
SPNCRNA.750	SPAC8C9.11_intron2	SPNCRNA.1366	SPAC15A10.06_intron1
SPNCRNA.760	SPAC8C9.14_intron4	SPBTRNALYS.06	SPAC15A10.06_intron2
SPAC1610.03c	SPAC15A10.06_intron1	SPNCRNA.1378	SPAC15A10.08_intron2
SPAC1002.09c	SPAC15A10.06_intron2	SPBC947.04	SPAC15E1.03_intron1
SPAC1002.12c	SPAC15A10.08_intron2	SPBP35G2.16c	SPAC15E1.08_intron1
SPAC1002.15c	SPAC15E1.03_intron1	SPBC725.06c	SPAC15E1.08_intron2
SPAC1002.17c	SPAC15E1.08_intron1	SPNCRNA.1424	SPAC15E1.08_intron4
SPNCRNA.765	SPAC15E1.08_intron2	SPBC30B4.09	SPAC15E1.09_intron1
SPNCRNA.767	SPAC15E1.08_intron4	SPNCRNA.570	SPAC15E1.09_intron3
SPNCRNA.771	SPAC15E1.09_intron1	SPNCRNA.15	SPAC1556.07_intron1
SPAC3H1.08c	SPAC15E1.09_intron3	SPBTRNALEU.05	SPAC4H3.09_intron1
SPNCRNA.780	SPAC1556.07_intron1	SPBC83.19c	SPAC4H3.09_intron2
SPNCRNA.782	SPAC4H3.09_intron1	SPNCRNA.1470	SPAC1071.08_intron1
SPAC3C7.05c	SPAC4H3.09_intron2	SPBC16E9.16c	SPAC926.02_intron1
SPAC3C7.14c	SPAC1071.08_intron1	SPNCRNA.1485	SPAC323.04_intron1
SPNCRNA.795	SPAC926.02_intron1	SPBC23G7.13c	SPAC11G7.02_intron3
SPAC23C11.04c	SPAC323.04_intron1	SPNCRNA.1491	SPAPB18E9.01_intron3
SPAC23C11.06c	SPAC11G7.02_intron3	SPNCRNA.1492	SPAC27E2.02_intron1
SPAC18G6.01c	SPAPB18E9.01_intron3	SPNCRNA.1496	SPAC19G12.08_intron1
SPAC4G9.11c	SPAC27E2.02_intron1	SPBC24C6.09c	SPAC23A1.03_intron1
SPAC13G7.02c	SPAC19G12.08_intron1	SPNCRNA.1517	SPAC25B8.20_intron1
SPAC6C3.02c	SPAC23A1.03_intron1	SPNCRNA.1523	SPAC1F7.04_intron1
SPAC6C3.03c	SPAC25B8.20_intron1	SPBC365.12c	SPAC1F7.05_intron1
SPAC6B12.03c	SPAC1F7.04_intron1	SPNCRNA.1525	SPAC2C4.05_intron1
SPNCRNA.825	SPAC1F7.05_intron1	SPNCRNA.1530	SPAC2C4.09_intron1
SPAC32A11.02c	SPAC2C4.05_intron1	SPNCRNA.1539	SPAC25G10.06_intron1
SPAC19A8.10	SPAC2C4.09_intron1	SPBC3E7.02c	SPAC23D3.02_intron1
SPAC23H3.15c	SPAC25G10.06_intron1	SPBC3E7.16c	SPAC23D3.16_intron2
SPNCRNA.833	SPAC23D3.02_intron1	SPBC19C7.04c	SPAC1527.02_intron2
SPAC25H1.08c	SPAC23D3.16_intron2	SPNCRNA.1554	SPAC29E6.08_intron1
SPAC6F6.02c	SPAC1527.02_intron2	SPNCRNA.1558	SPAC29E6.08_intron2
SPAC6F6.10c	SPAC29E6.08_intron1	SPNCRNA.1564	SPAC29E6.08_intron3
SPNCRNA.850	SPAC29E6.08_intron2	SPNCRNA.1570	SPAC16.01_intron1
SPAC8F11.05c	SPAC29E6.08_intron3	SPNCRNA.1573	SPAC16.01_intron2
SPACUNK4.15	SPAC16.01_intron1	SPNCRNA.1577	SPAC16.01_intron4
SPNCRNA.56	SPAC16.01_intron2	SPBC19F8.01c	SPAC9E9.04_intron1
SPAC2E1P3.02c	SPAC16.01_intron4	SPNCRNA.1595	SPAC17C9.11c_intron1
SPNCRNA.860	SPAC9E9.04_intron1	SPBC2G2.17c	SPAC17C9.11c_intron2
SPAC2E1P3.05c	SPAC17C9.11c_intron1	SPNCRNA.1604	SPAC17C9.09c_intron2
SPNCRNA.861	SPAC17C9.11c_intron2	SPNCRNA.1618	SPAC17C9.05c_intron2
SPNCRNA.863	SPAC17C9.09c_intron2	SPNCRNA.1620	SPAC17C9.01c_intron2
SPAPB24D3.04c	SPAC17C9.05c_intron2	SPNCRNA.1634	SPAC1851.03_intron2
SPAPB24D3.07c	SPAC17C9.01c_intron2	SPNCRNA.1647	SPAC12B10.09_intron2
SPAPB24D3.08c	SPAC1851.03_intron2	SPNCRNA.1654	SPAC12B10.09_intron3
SPAPB24D3.10c	SPAC12B10.09_intron2	SPNCRNA.1661	SPAC12B10.13_intron2
SPNCRNA.866	SPAC12B10.09_intron3	SPNCRNA.1664	SPAC30C2.08_intron1
SPNCRNA.868	SPAC12B10.13_intron2	SPBC56F2.15	SPAC144.03_intron2
SPNCRNA.869	SPAC30C2.08_intron1	SPBC56F2.06	SPAC144.05_intron5
SPNCRNA.875	SPAC144.03_intron2	SPBC56F2.03	SPAC1834.07_intron1
SPAC24C9.06c	SPAC144.05_intron5	SPNCRNA.576	SPAC1834.07_intron2
SPAC24C9.07c	SPAC1834.07_intron1	SPNCRNA.497	SPAC1834.07_intron3
SPAC688.04c	SPAC1834.07_intron2	SPNCRNA.1100	SPAC17D4.01_intron1
SPNCRNA.888	SPAC1834.07_intron3	SPNCRNA.1114	SPAC17D4.01_intron2
SPNCRNA.890	SPAC17D4.01_intron1	SPCC320.07c	SPAC458.06_intron2
SPAC6G10.03c	SPAC17D4.01_intron2	SPCC1235.13	SPAC458.07_intron3
SPNCRNA.900	SPAC458.06_intron2	SPNCRNA.1121	SPAC1782.07_intron1
SPNCRNA.905	SPAC458.07_intron3	SPNCRNA.1137	SPAC1782.07_intron3
SPNCRNA.908	SPAC1782.07_intron1	SPNCRNA.1143	SPAC1782.11_intron1
SPAC3A11.06	SPAC1782.07_intron3	SPNCRNA.1144	SPAC4F10.02_intron1
SPAC3A11.04	SPAC1782.11_intron1	SPNCRNA.472	SPAC4F10.18_intron2
SPNCRNA.919	SPAC4F10.02_intron1	SPNCRNA.1158	SPAC4F10.20_intron1
SPNCRNA.922	SPAC4F10.18_intron2	SPCPB16A4.07	SPAC4F10.20_intron2
SPNCRNA.925	SPAC4F10.20_intron1	SPNCRNA.1190	SPAC4F10.20_intron3
SPAC15A10.05c	SPAC4F10.20_intron2	SPNCRNA.1194	SPAC19B12.08_intron1
SPAC15E1.02c	SPAC4F10.20_intron3	SPCC622.11	SPAC19B12.09_intron2
SPNCRNA.931	SPAC19B12.08_intron1	SPNCRNA.67	SPAC19B12.10_intron2
SPNCRNA.937	SPAC19B12.09_intron2	SPCC584.12	SPAC1B3.20_intron1
SPAC4H3.03c	SPAC19B12.10_intron2	SPNCRNA.1209	SPAC1B3.13_intron1
SPNCRNA.952	SPAC1B3.20_intron1	SPNCRNA.1211	SPAC1B3.14_intron3
SPAPB15E9.02c	SPAC1B3.13_intron1	SPCC417.04	SPAC1952.01_intron1
SPNCRNA.955	SPAC1B3.14_intron3	SPNCRNA.583	SPAC1952.07_intron1
SPAC27E2.06c	SPAC1952.01_intron1	SPNCRNA.1217	SPAC1952.13_intron2
SPAC19G12.15c	SPAC1952.07_intron1	SPNCRNA.1218	SPAC1952.16_intron1
SPNCRNA.959	SPAC1952.13_intron2	SPCC191.01	SPAC890.03_intron2
SPNCRNA.971	SPAC1952.16_intron1	SPNCRNA.1222	SPAC890.03_intron3
SPNCRNA.973	SPAC890.03_intron2	SPCC191.10	SPAC890.08_intron1
SPAC21E11.03c	SPAC890.03_intron3	SPCC191.11	SPAC22E12.02_intron1
SPAC2C4.15c	SPAC890.08_intron1	SPCC1223.02	SPAC22E12.04_intron2
SPAC25G10.04c	SPAC22E12.02_intron1	SPCC737.04	SPAC2E12.02_intron1
SPAC27F1.05c	SPAC22E12.04_intron2	SPNCRNA.1242	SPAC29A4.14c_intron2
SPAC23D3.04c	SPAC2E12.02_intron1	SPCC1906.04	SPAC29A4.08c_intron2
SPAC23D3.10c	SPAC29A4.14c_intron2	SPNCRNA.1265	SPAPJ691.03_intron1
SPNCRNA.980	SPAC29A4.08c_intron2	SPNCRNA.513	SPAC19D5.03_intron1
SPAC23D3.17	SPAPJ691.03_intron1	SPNCRNA.516	SPAC19D5.03_intron2
SPAC29E6.05c	SPAC19D5.03_intron1	SPNCRNA.517	SPAC14C4.11_intron1
SPAC9E9.09c	SPAC19D5.03_intron2	SPNCRNA.1283	SPAC14C4.14_intron1
SPAC17C9.06	SPAC14C4.11_intron1	SPNCRNA.1289	SPAC14C4.14_intron2
SPAC27D7.05c	SPAC14C4.14_intron1	SPCC70.06	SPAC11E3.06_intron2
SPAC27D7.09c	SPAC14C4.14_intron2	SPNCRNA.521	SPAC11E3.10_intron1
SPNCRNA.995	SPAC11E3.06_intron2	SPNCRNA.1294	SPAC11E3.10_intron2
SPNCRNA.998	SPAC11E3.10_intron1	SPNCRNA.29	SPAC11E3.10_intron4
SPNCRNA.563	SPAC11E3.10_intron2	SPCC757.02c	SPAP8A3.08_intron1
SPNCRNA.1001	SPAC11E3.10_intron4	SPNCRNA.22	SPAP8A3.08_intron2
SPNCRNA.1005	SPAC11E3.15_intron1	SPNCRNA.1110	SPAC4D7.05_intron2
SPAC144.17c	SPAP8A3.08_intron1	SPNCRNA.1126	SPAC4D7.09_intron1
SPNCRNA.1017	SPAP8A3.08_intron2	SPCC4G3.03	SPAC4D7.09_intron2
SPAC458.04c	SPAC4D7.05_intron2	SPNCRNA.1141	SPAC4D7.11_intron2
SPAC11H11.02c	SPAC4D7.09_intron1	SPNCRNA.580	SPAC3G6.01_intron1
SPNCRNA.1025	SPAC4D7.09_intron2	SPCC18B5.02c	SPAC3G6.02_intron1
SPAC20G4.03c	SPAC4D7.11_intron2	SPCPB16A4.06c	SPAC3G6.05_intron2
SPAC4F10.07c	SPAC3G6.01_intron1	SPNCRNA.1165	SPAC29B12.08_intron1
SPNCRNA.1033	SPAC3G6.02_intron1	SPCC1259.14c	SPAC1039.01_intron2
SPAC1B3.06c	SPAC3G6.05_intron2	SPCTRNAARG.10	SPAC13G6.05c_intron1
SPAC1B3.16c	SPAC29B12.08_intron1	SPNCRNA.1172	SPAC13G6.11c_intron1
SPAC1952.09c	SPAC1039.01_intron2	SPCC132.04c	SPAC1639.01c_intron1
SPAC22E12.03c	SPAC13G6.05c_intron1	SPCC663.06c	SPAC1639.02c_intron12
SPAC2E12.03c	SPAC13G6.11c_intron1	SPCC417.06c	SPAC1639.02c_intron10
SPAC1250.02	SPAC1639.01c_intron1	SPNCRNA.1219	SPAC18B11.10_intron2
SPNCRNA.1050	SPAC1639.02c_intron12	SPNCRNA.1223	SPAC18B11.04_intron3
SPNCRNA.1051	SPAC1639.02c_intron10	SPNCRNA.1232	SPAC18B11.04_intron2
SPSNORNA.16	SPAC18B11.10_intron2	SPNCRNA.1252	SPAC18B11.04_intron1
SPAC26F1.07	SPAC18B11.04_intron3	SPNCRNA.1255	SPAC12G12.02_intron1
SPAC26F1.06	SPAC18B11.04_intron2	SPCC1739.08c	SPAC630.14c_intron3
SPAC26F1.05	SPAC18B11.04_intron1	SPNCRNA.1258	SPAC630.14c_intron2
SPAC14C4.01c	SPAC12G12.02_intron1	SPCC576.17c	SPAC31A2.15c_intron1
SPNCRNA.1063	SPAC630.14c_intron3	SPNCRNA.1272	SPAC24H6.05_intron1
SPNCRNA.1068	SPAC630.14c_intron2	SPNCRNA.1274	SPAC227.19c_intron1
SPAP8A3.04c	SPAC31A2.15c_intron1	SPNCRNA.584	SPAC227.11c_intron2
SPNCRNA.1071	SPAC24H6.05_intron1	SPNCRNA.1276	SPAC227.16c_intron2
SPAP8A3.07c	SPAC227.19c_intron1	SPCC965.07c	SPAC13A11.04c_intron2
SPAC4D7.02c	SPAC227.11c_intron2	SPNCRNA.1287	SPAC3H8.09c_intron1
SPAC4D7.14	SPAC227.16c_intron2	SPCC70.04c	SPAC1F3.04c_intron1
SPNCRNA.1082	SPAC13A11.04c_intron2	SPCC70.12c	SPAC1D4.02c_intron3
SPNCRNA.1083	SPAC3H8.09c_intron1	SPCC70.08c	SPAC1D4.02c_intron2
SPAC29B12.11c	SPAC1F3.04c_intron1	SPMITTRNALYS.01	SPAC1D4.03c_intron1
SPAC922.07c	SPAC1D4.02c_intron3	SPMITTRNASER.01	SPAC1D4.06c_intron2
SPAC186.02c	SPAC1D4.02c_intron2	SPMIT.02	SPAC1296.01c_intron4
SPAC186.05c	SPAC1D4.03c_intron1	SPMIT.03	SPAC22G7.01c_intron2
SPBC1348.11	SPAC1D4.06c_intron2	SPMITTRNAMET.02	SPAC22G7.01c_intron1
SPBPB21E7.07	SPAC1296.01c_intron4	SPMITTRNAPHE.01	SPAC4G8.02c_intron2
SPBC359.06	SPAC22G7.01c_intron2	SPMITTRNAGLY.01	SPAC4G8.02c_intron1
SPBC1683.02	SPAC22G7.01c_intron1	SPMITTRNALEU.01	SPAC4G8.07c_intron4
SPBC1683.12	SPAC4G8.02c_intron2	SPMITTRNALEU.02	SPAC4G8.07c_intron2
SPBC1198.02	SPAC4G8.02c_intron1	SPMITTRNAHIS.01	SPAC4G8.07c_intron1
SPNCRNA.1323	SPAC4G8.07c_intron4	SPMITTRNAPRO.01	SPAC4G8.11c_intron2
SPBC660.05	SPAC4G8.07c_intron2	SPMIT.08	SPAC4G8.12c_intron3
SPBC31E1.04	SPAC4G8.07c_intron1	SPMITTRNAILE.01	SPAC16C9.01c_intron2
SPBC1773.12	SPAC4G8.11c_intron2	SPMIT.09	SPAC16C9.04c_intron2
SPBC1271.08c	SPAC4G8.12c_intron3	SPMITTRNAVAL.01	SPAC2G11.07c_intron1
[truncated: 1,092 more rows]

## Sheet: GO Analysis UP Genes
GOID	TERM	CORRECTED P-VALUE	UNCORRECTED P-VALUE	FDR_RATE	EXPECTED_FALSE_POSITIVES	NUM_ANNOTATIONS	GENEDB_ID
[truncated: 3 more rows]

[truncated: 4 more sheets: Down-DBR1, GO Analysis DOWN, Compromised Introns SE, Improved Introns SE]
