# Supplementary material for: LaSSO, a strategy for genome-wide mapping of intronic lariats and branch points using RNA-seq
Source: HighWire-hosted journal article supplement (doi:10.1101/gr.166819.113), 2014-04-07
Supplement: Supplemental_Table4.xlsx [file Supplemental_Table4.xlsx]

## Sheet: Supplemntary Table 4
Supplemental Table 4. Manual inspection of all non-adenine fuzzy branch-sites
	Key
		Alternative 'A' within 1-2 mer with lower number of reads / or no nearby 'A' but matching branch-site consensus
		Alternative branch-site with lower number of reads downstream
		No obvious alternative branch-point
Chromosome	start	end	width	strand	gene	sur_exons	int_id	LarReads	LarReads_dbr1_1	LarReads_dbr1_2	LarReads_wt_1	LarReads_wt_2	LarSeq	NoBranches	NoSamples	BranchpointLetters	BranchSites	BranchPointIdx	BranchPointReads	Samples	JunctionReadsDbr1_1	JunctionReadsDbr1_2	IntronicExpressDbr1_1	IntronicExpressDbr1_2	SplEffDbr1_1	SplEffDbr1_2	ExonicExpDbr1_1	ExonicExpDbr1_2	Int_seq
II	3522920	3523001	82	1	SPBC1105.09	SPBC1105.09.1:exon:1-SPBC1105.09.1:exon:2	int_3186	759	429	328	1	1	109	4	4	U;A;G;A	CACAUACUGAU;CAUACUGAUAG;ACAUACUGAUA;CUGAUAGAUAU	12;10;11;6	478;273;7;1	dbr1_1;dbr1_2;wt_1;wt_2	25	15	7.03474	6.97508	26	5.33333	4.04428	3.77421	GTAAGCGCACGAAATCTTCATATCCAAATATTCATGATTGTACATAGTATCTTAATTCTTGAACACATACTGATAGATATAG
II	4189968	4190266	299	1	SPBC3F6.03	SPBC3F6.03.1:exon:1-SPBC3F6.03.1:exon:2	int_3318	238	133	104	1	0	101	9	3	U;A;G;U;A;U;U;U;U	AUUUUACUGAC;UUUACUGACUU;UUUUACUGACU;AGGAAACUUUU;UAAUUUUACUG;CUAUCCUUCUC;UUAUCUUUUUU;UUCAGCUUUUC;AAAUUAUUACC	12;10;11;165;14;67;38;77;230	118;107;3;3;2;2;1;1;1	dbr1_1;dbr1_2;wt_1	84	60	9.26457	9.23812	3.69565	10.1667	5.03771	5.01697	GTAAGTGAAACGAAAAACGTGCAGGAAATGTGACGGCGATGAAGTCGAACCCAACAAAAAAAAAATTATTACCTAAAAATAAAACTAATTCGGTGATGAATTTTTTTCTTTTTTTTTGTTGATTAGTAGGAAACTTTTTTATTTCCGAACTCACGTGTAAGATTGGGTTTCATCTGTTTTTTTATCATTGTTCGATAATGGTTATCTTGTGTTCTTTCAGCTTTTCTATCCTTCTCGCCTTACAACATTAACGTTTATCTTTTTTTGTTTTGTTTTTTTAATTTTACTGACTTCATTAG
II	2210363	2210811	449	1	SPBC14C8.04	SPBC14C8.04.1:exon:2-SPBC14C8.04.1:exon:3	int_2814	213	156	57	0	0	70	13	2	U;A;U;U;U;U;U;A;A;U;U;U;U	CCUUGACUAAC;UUGACUAACGG;UUGGAGAUACG;AUGUUAUUAAG;GCUGAGUUAAG;GAUAAUAUCAU;AAGCGGAUUAU;CUUGACUAACG;AACCUUGACUA;UAUCCGCUACC;UUCCUUCUUAG;UAUGAUUUUUU;AGCGGAUUAUG	13;11;250;336;223;345;358;12;15;67;146;293;357	165;27;5;4;2;2;2;1;1;1;1;1;1	dbr1_1;dbr1_2	378	284	11.1723	11.11	42.1111	25.9091	9.08394	9.10567	GTAAGTTATTGAAGAAGTTTTCAATGAATACGTACTGTCAGTATACATGTGAGCGAAGTCAGTTGTAAAATAAGGCGGAAATGGAAGCGGATTATGTGATAATATCATGTTATTAAGGAATTTAAATTTGAATAGGAGATAAAGATTAATATGATTTTTTGTAATTTTTTTGGGCATCTTTGTGGATTTTCTTTGGAGATACGTTTTAATGAATGTGATGCTGAGTTAAGTAGCTTATGAGCTGCTGCTTAAACACTCGTTCATGATTATTCGATCATTAGTCTTTACTGTCTGGATTCCTTCTTAGCAAATTGTTTCCATTCTTATTTACACTGATTATTTCGTTGCTGATCGTGGTATGATCTGTATTCTGTTTATCCGCTACCTTCAAAATCGGGT…
I	4305570	4305728	159	-1	SPAC25G10.05c	SPAC25G10.05c.1:exon:2-SPAC25G10.05c.1:exon:1	int_2123	77	45	31	0	1	45	5	3	U;A;A;G;U	UACAUACUGAC;CAUACUGACUC;GGAGAUUAAUG;ACAUACUGACU;UUUGCCUUAUA	16;14;58;15;34	45;27;3;1;1	dbr1_1;dbr1_2;wt_2	266	173	8.61623	8.69092	267	87	7.85219	7.53543	GTAAGTGAAGCTTTTAAAGAAGCACAGTCTTGATTCCCTTTACATCTGTCCAAAATCAAGGATCTATAAAATTGATTGGACTTTAGATATTTCGGGAGATTAATGTGTCTTCATGCGTTTTGCCTTATAGTTATTATACATACTGACTCATATGCATAG
III	1983642	1984125	484	1	SPCC18.15	SPCC18.15.1:exon:2-SPCC18.15.1:exon:3	int_4755	4	1	3	0	0	2	2	2	U;U	AAGUAAAUAAU;CCUCGCCUUUC	216;91	3;1	dbr1_1;dbr1_2	11	1	7.6483	7.69095	6	1	3.69741	0.0823496	GTAAGTTGCCAAAACGGTCAACGAGCAGAAGTTCATCAAAAGAATTAAAAGATTGGCGTAAAATGATGAGGGTTTTTCGCAACCATGTGATTTAGTCAATAATACAGTATCCTGTCGTAAATCTACAGTTCGTATCAAGCCACGGTTTCCCCTTTTGACTATACGCTTTCTTGAGCTCATGCTATTCACACCTTTGTTTTGAAGGCTAGTCAAGAAGGTTTATTTCGGTGTTCAAAAGAAAGCGTTTCTAATCAGTGGTGCAAGTAAATAATCCGTAGTCGATTTTTTAAACGCGGAAAAAGGGAGTAATTATACCCATATTATTCCACAACGCTCTCCTTTTACCTTTTCTTCGTTTTCTCTAGTATTTTCACTCCATCATTGAACCTCGCCTTTCTC…
I	3259054	3259183	130	-1	SPAC6G9.07c	SPAC6G9.07c.1:exon:3-SPAC6G9.07c.1:exon:2	int_1876	175	101	73	1	0	59	4	3	U;A;G;U	UUUUUACUGAU;UUUACUGAUGC;UUUUACUGAUG;UUACUGAUGCA	20;18;19;17	109;58;7;1	dbr1_1;dbr1_2;wt_1	46	32	6.53303	6.41972	6.71429	2.75	6.99786	7.21871	GTATGTCTTAGGCATCCGATGTTTCCGATTCGAACTGGTACATTCACTGATCTTTCGATTTGGAATAACGGAGTTTTGAAAGTCATTCTCATTATTTGGATTTTTTTTACTGATGCATTTATGAAATTAG
II	817280	817415	136	-1	SPBC530.11c	SPBC530.11c.1:exon:2-SPBC530.11c.1:exon:1	int_3527	83	45	38	0	0	51	3	2	U;A;G	UUCAUACUGAC;CAUACUGACCU;UCAUACUGACC	16;14;15	47;35;1	dbr1_1;dbr1_2	22	14	6.97802	7.18346	23	15	3.73608	3.41491	GTAAGTCAATACCGACTCGAACTGCTAATGTCGGCATATGGGGAGAAATACAAAATCCACCGATTTACTTTTCTTTCTTTTATTGATGATTTATATGCCTTTTTTTGTTTTTATTCATACTGACCTATTTGGATAG
III	641925	642137	213	-1	SPCC5E4.03c	SPCC5E4.03c.1:exon:2-SPCC5E4.03c.1:exon:1	int_5012	14	4	10	0	0	7	6	2	U;A;U;U;U;U	AUUUAAUUCUU;UUUACUAACGU;CCACCCAUAUU;AUGUUUGUUUC;UUCUUUAUAAG;CCAUAUUUAAU	41;11;49;167;35;45	4;3;3;2;1;1	dbr1_1;dbr1_2	29	26	8.61662	8.9113	4.28571	5.4	5.69196	5.6673	GTAAGTTGGTCATATTGGAGGAGGTTACGAATTTGTTACATGTTTGTTTCGATGATCTACGAACAAGAGGGGTATTTGAACTATTCTAAATACTTATTAGTTTCTTTATCTATTGAGTTTACAACTTGTCTTTATTTCTGAAACTCATTCCACTTGACCACCCATATTTAATTCTTTATAAGGATAAATGATAATTTTACTAACGTGCTATAG
III	1931217	1931424	208	-1	SPCC74.03c	SPCC74.03c.1:exon:3-SPCC74.03c.1:exon:2	int_5251	119	86	33	0	0	75	5	2	U;A;G;C;U	UAUUUGCUGAC;UUUGCUGACUG;AUUUGCUGACU;UUGCUGACUGU;ACGAAUUUAUG	15;13;14;12;26	62;52;3;1;1	dbr1_1;dbr1_2	35	22	7.67927	7.64458	7.2	11.5	4.99511	4.92205	GTAAGTGGTGCGGTTTGCGAGTTTTTGTTACAGTAAATTTCAGAAGTGATGTTGGATTGGTTTGATTTGTCAAAATGTACAAGTTATCCGATTGTCTTTTTTAAAAATAGAAAAAGATAAATTGTTTTTGCATCTGAAATGTTGCTGATGAAGGCTTGTTTACAAATTTGAATGCACGAATTTATGTATTTGCTGACTGTTTTTAAAG
III	495613	495672	60	-1	SPCC970.09	SPCC970.09.1:exon:2-SPCC970.09.1:exon:1	int_4957	9	1	8	0	0	4	2	2	U;A	AAUUUACUAAC;UUUACUAACGA	15;13	5;4	dbr1_2;dbr1_1	15	9	3.27595	3.56776	16	10	4.82752	4.79283	GTATGTTGCGTGAATAAGTGAAGATTGGAGGATGTTTGAATTTACTAACGAATGGTTAAG
I	2123357	2123451	95	1	SPAC20H4.07	SPAC20H4.07.1:exon:1-SPAC20H4.07.1:exon:2	int_441	31	17	14	0	0	22	2	2	U;A	GAAUUACUGAC;AUUACUGACAG	12;10	17;14	dbr1_1;dbr1_2	14	19	6.45668	6.06323	15	10	2.55811	2.28245	GTAAGCGTTTAGTAGTTCAATAAGCTTGCACATAAAAAAAAAATATTGGGTTTTTGTACCGGGATCTTAAAAGACGGAATTACTGACAGCTTTAG
I	1225937	1226038	102	1	SPAC10F6.10	SPAC10F6.10.1:exon:2-SPAC10F6.10.1:exon:3	int_275	46	24	21	0	1	30	4	3	U;A;A;A	AUAGUACUGAC;AGUACUGACAA;UAAUAGUACUG;GUUUAAUAGUA	12;10;14;17	33;11;1;1	dbr1_1;dbr1_2;wt_2	21	16	7.35052	7.39575	5.5	5.66667	4.09865	4.18187	GTAAGTGTAATATAGTTTAACTGCTCATAGGTTTTAGAACTCGAGGTCTTTTGATCCTTCACACTTTTACATTTTCATGTTTAATAGTACTGACAAATAAAG
I	906145	906287	143	-1	SPAC1687.03c	SPAC1687.03c.1:exon:2-SPAC1687.03c.1:exon:1	int_1315	43	24	19	0	0	26	3	2	U;A;U	AGUAUGCUGAU;UAUGCUGAUCU;AUGCUGAUCUA	18;16;15	25;16;2	dbr1_1;dbr1_2	54	30	5.83767	5.91682	55	31	5.54541	5.14535	GTATGTATATATTATGAGCAATTAAAACGTCCTTTATGAAGGTTTTAGTGTTCAGCTATTACGATTGCTTCTTGGTGACTCAGGCATCTTTTCATAATTTAAAGGTTCAATATAATATAGTATGCTGATCTATAAACTTATAG
I	1454928	1455043	116	1	SPAC3A12.18	SPAC3A12.18.1:exon:1-SPAC3A12.18.1:exon:2	int_326	39	22	17	0	0	26	3	2	U;A;G	CCGUUACUGAC;GUUACUGACCG;CGUUACUGACC	22;20;21	21;16;2	dbr1_1;dbr1_2	69	54	4.89254	4.99914	10	27.5	6.32009	6.0549	GTAAGTTATAAATAAACAACTCTGGTTATTTTTTGGTTGTAGTGATGTTTATGAAAATTTAACATTTCTCAACGTTGTTTATTATTACCGTTACTGACCGAGCTTTTTACTTTTAG
I	3162444	3162522	79	-1	SPAC3G9.17	SPAC3G9.17.1:exon:3-SPAC3G9.17.1:exon:2	int_1856	3	1	2	0	0	2	1	2	U	AAGUUACUGAC	23	3	dbr1_1;dbr1_2	0	1	4.59527	3.82295	1	1	3.27037	2.9939	GTGTGTCATTTGTTTTCCATGTTCAATGTTTAAAAATAAAAGGTTTGTAAAGTTACTGACTTTGTTATGATTAATATAG
I	1916388	1916817	430	1	SPAC110.03	SPAC110.03.1:exon:2-SPAC110.03.1:exon:3	int_407	204	109	93	1	1	88	12	4	U;A;G;U;U;U;U;U;A;U;U;U	GAUUUACUGAC;UUUACUGACUA;AUUUACUGACU;AUGUAUUUAUC;UGGGGACUAUU;UAUCUCGUAAG;GAAGCCUUAUC;GUUGCUUUUAC;UAUUCUAACUU;AUCGAUUUUAU;AAUGUAUUUAU;UUACUAUUCAA	12;10;11;273;88;169;176;66;81;265;274;356	102;81;4;4;3;3;2;1;1;1;1;1	dbr1_1;dbr1_2;wt_1;wt_2	122	109	9.2092	9.03089	24.6	18.3333	6.8292	7.00172	GTAAGTATAATTAGTTGTTTATGGAATGAAGTACTTGGTGAAGTTTTGTCCCCATATTAGAAATTTTTTACTATTCAAATGTTCGGTCACGGAAAATTTTGATATAAGGCTTTTTGTCAAAAAAAGGCTGAAGGATTAAACAATGACTCAATGTATTTATCGATTTTATCTCAGAAACTATTGAAAGTTTAATAATTTTTTTTTATCCGATGCTTTTTTTTTTCCACACTAGATCTAAAGACCGTAGGAAGCCTTATCTCGTAAGGAATAAGATGAGGCGACCACTTTCTTTCCCAGGAAGATTTGGTCGTTATTATTTCTGCTATTTGCTATATTGGGGACTATTCTAACTTTCTTGTTGCTTTTACTCCCGTTTTTAATTGATATAGCTGATTTTCA…
II	2960703	2960809	107	-1	SPBC2A9.14	SPBC2A9.14.1:exon:2-SPBC2A9.14.1:exon:1	int_3988	14	10	4	0	0	13	2	2	U;A	AAGUUGCUGAC;GUUGCUGACUC	16;14	9;5	dbr1_1;dbr1_2	75	57	5.32052	4.75872	12.6667	58	4.08458	4.01821	GTAAGTACTTAGAATCAAATTTTATTACTTTTTCTTTTCTTCCTTTATTCCCTTTGTCTTATTAGTATGTATGTTGGACATTAAAAGTTGCTGACTCCTTTCTTTAG
I	3103566	3103707	142	-1	SPAC589.06c	SPAC589.06c.1:exon:2-SPAC589.06c.1:exon:1	int_1844	17	10	7	0	0	15	4	2	U;A;A;U	GCUUUUCUGAC;UUUUCUGACAA;AAUAUAAAGUA;UGCGAGGUAUU	19;17;36;86	9;6;1;1	dbr1_1;dbr1_2	143	80	7.6913	8.02535	48	81	5.44692	4.97598	GTAAGTTTTATTATATTTAAACTTTAGTGTTCTGAGAATATTTGTCAAATGCGAGGTATTCTTTTGCATGGGCTTTATTAGATTTCGCACTATAGAAGAAATATAAAGTATGTTCAGCTTTTCTGACAAAATCGAAATTTAG
II	1162666	1162819	154	-1	SPBC409.12c	SPBC409.12c.1:exon:3-SPBC409.12c.1:exon:2	int_3618	12	6	6	0	0	10	3	2	U;A;A	UAUUUCCUAAC;UUUCCUAACUG;AUUUCCUAACU	13;11;12	5;4;3	dbr1_1;dbr1_2	7	4	4.53496	4.5298	1.33333	5	1.71598	2.35572	GTAACGAATATCAGCATTGAGGCAATAAGCAGTTCCACTACTGCATACACGACTCATTTAGTTGTTGAATCTAGTTAAGGTTTTTTATAAAATCAACTTTTGAGAAGCATCTGCCTCTATAGCTCCCTTTTTTCTATTTCCTAACTGAATTTAG
I	3980196	3980558	363	-1	SPAPB18E9.02c	SPAPB18E9.02c.1:exon:2-SPAPB18E9.02c.1:exon:1	int_2063	27	12	15	0	0	13	6	2	U;A;U;A;U;U	UUGCUCUUUUU;UUUACUAACCA;CUUGCUCUUUU;UUUUACUAACC;CUUUUACUAAC;AUUCGGUUGGU	43;14;44;15;16;238	8;6;6;4;2;1	dbr1_1;dbr1_2	29	45	9.2104	9.24129	2.30769	15.3333	3.03898	3.18133	GTAAGTGCAGTGGAATAGCGGGCGATGTTACGAAATTTCTCTGTGTTGTTGGCAGAAGGATACCATTGCTTGCTAGAATATTTATATTGTACATTTAATTTGTATCTTTCTTTTAACGATTCGGTTGGTATGACTTTGCAGATTACGCAAAAATAGCCATTGAATAAGGCTTCAATTGCCTTGATCTGTAAGTCATACGTATAATACTTAAATCTTCTATTTGCTGCCGACCTGTTTTAGTTCTTTTAAGCTGGATTGGCCAAGCTATGGCTGATACTCCTTGGGTCGCCTCTGTCCTTCAACTTTTGAAATCTTGCTCTTTTTCAATTTATTGCTAGGTCTTTTACTAACCAAGTTGCATAG
II	4184186	4184319	134	-1	SPBC14F5.13c	SPBC14F5.13c.1:exon:2-SPBC14F5.13c.1:exon:1	int_4297	161	96	63	1	1	70	7	4	U;A;G;U;U;U;U	CGGUGACUGAC;GUGACUGACUU;GGUGACUGACU;GACUGACUUUU;AUCUUCCUUUU;CGGAAUCUUCC;GACGGAAUCUU	15;13;14;11;41;45;47	97;52;8;1;1;1;1	dbr1_1;dbr1_2;wt_1;wt_2	155	92	6.76883	6.54372	31.2	23.25	6.55481	6.3159	GTAAGTGATTGGAGTAAGCTCTCTCATAAATCCGTTGCTCTTTTGAAGGAAAATGATTTTTTTTATATTTAGAGCACTGGGACGGAATCTTCCTTTTTTTTACAATATTTCTCGGTGACTGACTTTTTTTAAAG
III	934285	934763	479	-1	SPCC24B10.19c	SPCC24B10.19c.1:exon:2-SPCC24B10.19c.1:exon:1	int_5077	16	5	9	0	2	9	5	3	U;A;A;U;U	UUAAUUAUAUU;AUUUCUAACCG;AAUUUCUAACC;AAAUUUCUAAC;AUUAUAUUUUU	240;13;14;15;237	8;5;1;1;1	dbr1_1;dbr1_2;wt_2	21	9	7.50089	7.30258	7.33333	2	4.10431	3.97514	GTAAGAATGAATATTAGATATAATCAAGTTTATTTTTATCGCTTTTTCTAAAATTGTGAATTTTCAATTGATCGTCGTATGCTTGATAGCAATTTTGATGATCTTTTATCAAACATTTTGCACGCCTATAACTCTAAGGTTATATCAATTCAATTTTCTCAAAGAAACATATAAAATTTTACTCTATTCATGACTTGGCATGAGTGGTTGGATGAGACTGTGGCGTTGGTCGTTAATTATATTTTTTGTTGTTTCTGTTCGAAATTGAATGGTTGATTTCAACATTTAGCCCTTGGGTTTTTATTTCCCTAGGAAAAATGTTTGGGAGATTTAACCGTACAGTTTTCTGTAAAGCAAATGATTGTATAAAAAAATTATGATGACTGAAAATTCAAATCT…
MT	5290	6499	1210	1	SPMIT.01	SPMIT.01.1:exon:1-SPMIT.01.1:exon:2	int_5359	35	9	16	4	6	20	2	4	U;U	ACUAAAAUG;UACUCUUUCGG	2;998	34;1	dbr1_1;dbr1_2;wt_1;wt_2	330	365	8.72505	8.49747	0.324828	0.471649	10.8253	10.8698	TTTAAAGCCGCAGACAAAATTGTCTGAAAACTCTTCTCGATGCGAAAAAGTCCTCTACTCGGAAGTAATTACTCAGTTAATTTATTTTTTAACTAGTAAAAAGATTACTAACTTGGGGAAAATTCGCCTGGTTAAATCCATCAGAGACTCGTTTCTATCACAATTAGAAAATATTTTATGTTTCTTTTTGGTTTATAGAACAACATACTCTTTCGGAGTGTGTTTAATGAAGAGGTTCTTATTTAATAAATTTTTTAATAGACATCCTTTTACAAGGGTAAAAAGCTGTTTTTCATCATCTTCACCATCAAAATTCTCTTTTACTCAATGGTTAGTAGGATTTACTGATGGTGATGGTTGTTTTAGTATTTCAAAACAAAAAATAAAAAATGGCAAAAA…
II	3651030	3651173	144	-1	SPBP8B7.10c	SPBP8B7.10c.1:exon:3-SPBP8B7.10c.1:exon:2	int_4186	4	3	1	0	0	4	4	2	U;U;U;U	GAUAGUAUUAU;UCCUUGCUUUU;UUUCGUUUCCU;UAUUUGUUUUG	20;31;38;95	1;1;1;1	dbr1_1;dbr1_2	0	0	7.81474	8.101	1	1	-16.6096	-16.6096	GTAAGTTTTAATAAACGGAATGAGGGAAACACTTAAAAATACTATTTGTTTTGGTTTGAGACAGAATAATAATTTGTTTGATAAAAGTTCGACTGCTCATTTCGTTTCCTTGCTTTTGATAGTATTATTTTTAACACATTTTAG
I	3805931	3806162	232	1	SPAC1556.07	SPAC1556.07.1:exon:1-SPAC1556.07.1:exon:2	int_792	6	1	5	0	0	4	4	2	U;U;A;U	UCUAUGGUCAU;AAUCACAUUCU;AAGACUAACAU;UCCAAAAUAUU	138;148;11;83	2;2;1;1	dbr1_2;dbr1_1	17	30	8.64356	8.67737	3.6	15.5	4.45795	4.94241	GTAAGTTTAGATTATTGCAGTCGAGCTTTCTTGGATTCAATCTGAATAGCCGGCTTGTATCAAATTTCCTATTTTCCAATCACATTCTCTATGGTCATCACCATTATTTAATCAGAGATGGCTTGAAAGGAAGTTTTAATTATCCAAAATATTTCGGGAGCAAGCTATTCATGCTCTATGACCTAGTTTATTTCTCTTTCCATTTTGTAATAACAAGACTAACATTTTAAAG
I	2795046	2795289	244	1	SPAC1805.13	SPAC1805.13.1:exon:1-SPAC1805.13.1:exon:2	int_604	57	20	37	0	0	25	9	2	U;A;U;U;U;U;U;U;U	AUUUAAAUUCU;CAUACUGACAU;GUCAUACUGAC;AAAUUCUUUUU;UUUAAAUUCUU;UAAAUUCUUUU;AAUUCUUUUUU;UCCUCCUUUUC;UCAUAUGUUAC	172;10;12;168;171;169;167;57;40	13;12;9;6;6;5;3;2;1	dbr1_1;dbr1_2	12257	8429	9.43804	9.34482	1225.8	602.143	12.9907	12.8168	GTAAGTTTGATTAAGCTGGTTAACTTTTCAAGAGCGTGAAAATTGCTTGTAGACAGGGATATGAGATTTAAATTCTTTTTTCATGTTATTTAAAGTAGCTTATACGCATGATCAAATGTTTTATAGAGAAAATTTTTTTATTTTTCATTACACTTAAAAATTTTATGGCTTGCTTTTTTCTCCTCCTTTTCTTTACTTCATATGTTACCAGCAAATGTAGAAACAGTCATACTGACATTTTTAG
III	1306975	1307128	154	1	SPCC1322.09	SPCC1322.09.1:exon:2-SPCC1322.09.1:exon:3	int_4637	48	29	19	0	0	33	2	2	U;A	AUUUUACUGAC;UUUACUGACAU	14;12	26;22	dbr1_1;dbr1_2	114	63	7.48156	7.27396	11.5	5.81818	6.15846	6.16076	GTAAGTTGCGTATTTACGTTTACGCTTTGGACATAGCACTAATATTTGTGCTTTCTTTTATGCTGTCACCGATTACTTGGTTTTCAAAAGACAGATAGGTCAATGCATAATCATAATTAAGTTTTATGGGATAATTTTACTGACATGTTACCAG
I	2830600	2830798	199	1	SPAC3F10.19	SPAC3F10.19.1:exon:1-SPAC3F10.19.1:exon:2	int_610	17	7	10	0	0	10	9	2	U;A;U;U;A;U;U;U;U	UUUUUAGUCUU;AAUAACUAACA;UUAGUCUUUUU;UAACUCUUUUU;AUAACUAACAA;UAGUCUUUUUG;UUUAGUCUUUU;CUAUCUUUUUU;CUGAUUGUUCU	31;13;28;38;12;27;29;131;143	6;2;2;2;1;1;1;1;1	dbr1_1;dbr1_2	0	0	8.20952	8.31608	1	1	6.81732	6.76266	GTAAGTTTAATCCAATTTTTTACTTTTAAACGTTGAATTATCCAAAATGCTGATTGTTCTGCTATCTTTTTTTGTAAGAGACAGGGCTTAAAGGTCTAAGTACTTTTTTGAAAACTTATAATACAATTGTACTGCAGCACGGCATTTGATGATTTAACTCTTTTTTAGTCTTTTTGTATAATAACTAACAATCATTTAG
II	2928295	2928558	264	1	SPBC1703.07	SPBC1703.07.1:exon:2-SPBC1703.07.1:exon:3	int_2991	24	9	15	0	0	9	8	2	U;U;U;A;U;A;A;U	GACUAUUUUCU;GUAAGACUAUU;ACUAUUUUCUU;UUUAUUAACUG;AAGACUAUUUU;AUUUAUUAACU;UUUUCUAAUCU;UUUCGAUUAUU	119;123;118;14;121;15;32;92	8;5;4;2;2;1;1;1	dbr1_1;dbr1_2	420	347	7.21983	7.65633	70.1667	69.6	8.76222	8.63775	GTAAGTTGTCCGCATAAATATGCTTATTAGTTTGCAAATAAGCGTTTTAGCAAAAGATGTTCATGCTGATTTTCGATATTACATCAGTGATTCGTTTTCTACAACAAATCGCAGACGGAAATGATTAAATCACAGTAAGACTATTTTCTTTAAGTTTGAATTCAATTTCGATTATTTTGCAGAAAATAGAAATGCTGCGACTAGCATTATCACTAATAAAAAAAATTTTCTAATCTTAAAAGATTTATTAACTGAAATAATTAG
I	2734928	2735331	404	-1	SPAC6F6.03c	SPAC6F6.03c.1:exon:2-SPAC6F6.03c.1:exon:1	int_1759	24	5	5	6	8	10	7	4	U;A;U;U;U;U;U	CAGCAUAUUUC;UUUUCUAACUU;UUACAACUCUG;UUUUUUCUAAC;UACAUUGUUUU;AGCAGUAUAUC;AAGACUCUUUU	245;10;217;12;68;116;266	12;5;3;1;1;1;1	wt_1;wt_2;dbr1_1;dbr1_2	61	38	9.30411	9.34754	1.12727	1.02632	7.03915	6.87631	GTAAGTCATTTTTGTTTTTAAAATCTATTTGCATTGTTTTTGATACATGGAAAGATCAAGCTATATGCATCTGTTATGCATTAGTTCTATTTAATTGCTGGAATAGTATTCAGTATGCCCATTGTTAAGTCAAGACTCTTTTGTATGCTTTTCAGCATATTTCCCGTCAATTGAAGTCTGTTACAACTCTGGGAGAGTATACAAACTGTCTCTAAATTATATAGCCGTTCTGGCTATATCAGAGATAGTTGTATTGTCTTTGCTTTAATTTCGGTGTTTCAAGCAGTATATCGCTGCATATAGTTGTCACACTTACAAATGTAAAGACTTACATTGTTTTCATGTATCAACGAACAACCAGATATATCTTTATTAACCAATGTTCTTTTTTCTAACTTT…
II	4128412	4128491	80	-1	SPBC1861.01c	SPBC1861.01c.1:exon:2-SPBC1861.01c.1:exon:1	int_4291	1	1	0	0	0	1	1	1	U	AAUUUACUAAA	20	1	dbr1_1	23	17	3.57712	2.8048	24	18	6.14896	6.13735	GTACGTTCGCGAATTGGGTTCCATATATCGTAATAATTATTCTTTTTTTAATAAATTTACTAAAAAATATTTTTATCTAG
II	3215430	3215478	49	1	SPBC21.01	SPBC21.01.1:exon:2-SPBC21.01.1:exon:3	int_3083	1	1	0	0	0	1	1	1	G	AACAUUGGCUC	34	1	dbr1_1	1	2	-0.239208	0.0526025	2	1.5	4.04674	4.14493	GTACGCATAACATTGGCTCTTTAATTTACGCTTAACTAACTTAATATAG
II	1348623	1348800	178	1	SPBC27B12.14	SPBC27B12.14.1:exon:2-SPBC27B12.14.1:exon:3	int_2633	30	19	11	0	0	20	3	2	U;A;A	AUGAAACUGAC;GAAACUGACUU;CUAUGAAACUG	13;11;15	17;12;1	dbr1_1;dbr1_2	35	39	5.88275	5.58388	7.2	4	6.31987	6.57984	GTAAGTATACATAGCGAATCTTTTTTAAAACTGTTTGCTCCAGGTTCTGAAGTGGGTTTGGGGGTGCCACAAAAGAGAGAATATTAAGTCTTCCTTAATATTTCCCTTTACCTTCTTCAAACGTGGTGTTTGCTTTCAATGGTTTTTGTTCGTATTCTATGAAACTGACTTTGAGTAG
I	5059803	5060144	342	1	SPAC2E12.02	SPAC2E12.02.1:exon:1-SPAC2E12.02.1:exon:2	int_1058	4	2	2	0	0	4	4	2	U;U;U;U	CAAGCCCUUUU;UUGUUCUUCCG;GGAUCAGUAAG;GAAAACUUUUG	80;164;199;209	1;1;1;1	dbr1_1;dbr1_2	10	7	8.47629	8.45279	2.2	2.66667	6.27546	5.9326	GTAAGTGTCTTTAAAAAGTGAAGGTGTAACAAAAAGTCGAAGACAAGCTTTTACACAATTAATTTTTTTTATTATGAATGTGTCCCCCTACTTGTCTGCATTTATTCGAAGATATATCGGGCTTTGGAAAACTTTTGGATCAGTAAGCTTAACAACGACTATCTCTTTCGATTGTTCTTCCGTTCCACTTTTCGACGATATGAAAAATATTGCAATACTTCGGAATTATTGATTATTTATCTAATTAGTCTTTGTCAAGCCCTTTTCTATCTTTTCTTGTCCTTCGCATCTCATTTTATTACATTCATTTTTTTTTTTTTTTGGTTTACTAACTTTTTACAG
II	3007188	3007315	128	-1	SPBC15D4.01c	SPBC15D4.01c.1:exon:3-SPBC15D4.01c.1:exon:2	int_4003	7	2	5	0	0	5	2	2	U;A	UUAAUGCUGAC;AAUGCUGACGA	12;10	6;1	dbr1_1;dbr1_2	11	1	3.89905	3.83722	3	1	2.97556	1.68241	GTAAGTACACATACCATTGACGATTTTTAAGCAAAACATGTTTCTTTCTGATGACTTTTTTTTATTTTAAATCATTGCTATTCTCGTTTTGAAATATAATATGACGAATTTAATGCTGACGATTTTAG
III	144436	144588	153	1	SPCC320.11c	SPCC320.11c.1:exon:1-SPCC320.11c.1:exon:2	int_4380	12	6	6	0	0	10	3	2	U;A;U	GCGUUACUGAC;GUUACUGACUA;UACGUUGUAAU	16;14;28	6;5;1	dbr1_1;dbr1_2	85	39	4.92545	4.80223	8.6	13.3333	5.9313	5.44971	GTAAGTTCATTGCACTATTTCATTGTGTTTGGAATATTTCATTCCATCGAGTTTCTTATAAAGTGTTGGGATTACTTTTTACTTCTAATACTCTACAAGAAATATTTATGTTATTTTCTACGTTGTAATTGCGTTACTGACTAGTAAAACTAG
II	1319621	1319682	62	-1	SPBC30B4.07c	SPBC30B4.07c.1:exon:2-SPBC30B4.07c.1:exon:1	int_3643	1	1	0	0	0	1	1	1	U	CUUUUGCUAAC	12	1	dbr1_1	2	5	2.00625	2.03503	3	2	4.87517	4.88594	GTAAGTAGTAACAAAGCTTTACGATAGGCTTTGAACATTTGACCTTTTGCTAACCTCTTTAG
II	1104377	1104460	84	-1	SPBC1709.04c	SPBC1709.04c.1:exon:3-SPBC1709.04c.1:exon:2	int_3607	1	1	0	0	0	1	1	1	U	AAAGUGCUGAC	15	1	dbr1_1	15	5	1.3051	1.85995	8	6	3.72779	2.92007	GTATGTAATTAATAATCTAAAGCCAATTTTTAACTTGAATAATTATTGATTTATTGTGAAATAAAGTGCTGACATTGAATTTAG
I	4005274	4005340	67	1	SPAC27E2.02	SPAC27E2.02.1:exon:2-SPAC27E2.02.1:exon:3	int_842	3	2	1	0	0	3	2	2	U;A	AUCUUGCUAAC;CUUGCUAACUU	18;16	2;1	dbr1_1;dbr1_2	2	5	1.63133	-0.398772	1.5	6	2.16904	3.40427	GTAAGTACTATCTGAAAATGTTATTCAATAAAATCAACCTAAATCTTGCTAACTTGCTATTTCTCAG
I	5023176	5023273	98	-1	SPAC22E12.03c	SPAC22E12.03c.1:exon:2-SPAC22E12.03c.1:exon:1	int_2288	1	1	0	0	0	1	1	1	U	UAUAUGCUAAC	19	1	dbr1_1	121	101	3.0827	2.63755	122	51	6.9102	6.84807	GTAAGTTGCATAAGACAAAACGAAGTCCAACAAGCTGATTCGTTTCTGTTTTTTTTTATTTCTTCATTAACCTATATGCTAACATGTTCTTTCATTAG
II	186536	186593	58	-1	SPBC1198.07c	SPBC1198.07c.1:exon:2-SPBC1198.07c.1:exon:1	int_3390	1	1	0	0	0	1	1	1	U	UAUCUUAUUAA	15	1	dbr1_1	11	5	-0.482476	1.80932	6	2	2.59038	1.65981	GTAAGTCTGCCAGTTGTCTCGCACCCAATTTGAATATATCTTATTAACCATATTTAAG
II	3253068	3253133	66	-1	SPBC25H2.18	SPBC25H2.18.1:exon:2-SPBC25H2.18.1:exon:1	int_4077	4	1	1	2	0	3	1	3	U	GGAAUGCUAAU	15	4	dbr1_1;dbr1_2;wt_1	8	2	3.33109	3.43026	3	0.6	5.06915	4.49423	GTAGAATTTATAGCTTAAAAAGGACTAGTTTGTTGTAAATGCAAGGAATGCTAATACTACTTGTAG
I	252338	252391	54	-1	SPAC1639.01c	SPAC1639.01c.1:exon:3-SPAC1639.01c.1:exon:2	int_1157	2	2	0	0	0	1	1	1	U	UUCAUUCUAAC	15	2	dbr1_1	167	87	4.26445	4.37184	21	22	5.64422	5.48177	GTACGTCTCCATCGTTTTTTGACCATACTTTTTTCATTCTAACATACGTTTTAG
I	1568870	1569063	194	1	SPAC1705.02	SPAC1705.02.1:exon:1-SPAC1705.02.1:exon:2	int_338	3	1	2	0	0	2	2	2	U;A	ACUUGCUUAUU;CUUGCUUAUUG	94;93	2;1	dbr1_2;dbr1_1	31	32	6.50349	6.72916	32	33	5.32968	5.6673	GTAAGTTTTAAACCTTTGAGAATGAAGAAGAAATTCTAAAAATTATTATCCCCCTCTCAGCAGGGAATAGCTGCGTTGAACTATCTCTTTTATACTTGCTTATTGATTTTTAGTATTCTTTTAGCCTTTTTCACATTCTGATATTCATTAAAATTAAAACTATATCTATAATTTGTAATTACTAATGTTACTAG
II	1760162	1760231	70	-1	SPBC11G11.02c	SPBC11G11.02c.1:exon:2-SPBC11G11.02c.1:exon:1	int_3720	3	2	1	0	0	3	1	2	U	CGUGUGCUAAU	21	3	dbr1_1;dbr1_2	8	3	4.97412	4.23846	0.818182	0.444444	4.23798	4.10095	GTACGGAAAACATGAGTTTGCGGTCTGAGTCGTTTAATCGAACGTGTGCTAATGTTACGAATATGGATAG
II	4072926	4073008	83	-1	SPBC1347.06c	SPBC1347.06c.1:five_prime_UTR:2-SPBC1347.06c.1:exon:2	int_4279	3	3	0	0	0	2	2	1	U;A	UCAUUACUGAU;AUUACUGAUUG	19;17	2;1	dbr1_1	2	0	2.32238	1.61419	0.75	0.25	1.28803	-16.6096	GTAAGTGAGAATCCATTTGATGCCATGCTTTGAAGCTGGATATTTTTCTTGTTTCCTTCATTACTGATTGATTTTGCTTATAG
II	1225442	1225968	527	1	SPBC725.10	SPBC725.10.1:exon:1-SPBC725.10.1:exon:2	int_2587	6	5	1	0	0	6	3	2	U;A;U	UGUUUGCUGAC;UUUGCUGACCA;GACUACUUCAU	16;14;54	3;2;1	dbr1_1;dbr1_2	50	27	5.19181	5.18788	8.5	7	5.61422	5.62539	GTAAGTAATGTCACTAATTAAGGTTGATGTAGATCAAGAGAGTCAAAAGCATGACATGAGACAGTAGAATGTATTGTTGCATTTAAGAAAGAGCTTAAGCTGCACGATCAAAGTTTGAAAGAAACAGAAAAAAAAACACTAAAAAAACAATAACAGAAGAATCAGGTCGGAGAAAAAATATTATTGGAATAAGAAAAAGACAGCAGGAGGGATATGAGTTAAATAAAAAAAAAAAATTGGGCAGAACGAAAAAAGTCAAAACAAATTGATGGATAATAAATCGGTGACTAAAAAAATAATGAGTATAATATGATATGCAAAAAGGCCATGACTGAGTGATTTCGACTTGTTTCTTTCTCAAAAAATCACCAACAACATTGCAGTCCTAAATTGAACTTT…
I	877107	877174	68	1	SPAC23G3.06	SPAC23G3.06.1:exon:2-SPAC23G3.06.1:exon:3	int_182	6	4	2	0	0	5	2	2	U;A	AACUUGCUAAC;CUUGCUAACAC	15;13	4;2	dbr1_1;dbr1_2	52	37	5.68034	6.3213	7.57143	5.42857	5.96511	5.78815	GTATGTTTGTTGCATGCAACAATTGATTAAATGTATGATGAGAATTAACTTGCTAACACTGAATTTAG
I	4166969	4167076	108	1	SPAC25B8.20	SPAC25B8.20.1:exon:1-SPAC25B8.20.1:exon:2	int_857	4	2	2	0	0	4	1	2	U	AUAAAGCUGAC	18	4	dbr1_1;dbr1_2	15	14	4.42795	4.95681	16	15	4.34264	4.21942	GTAAGTAACGGGTACATTGAAGATTGCACTTATTTTTTAAGATGAAGAATAAAGGAGGGAAGACAGGTTTTGATTAAGAATGAATAAAGCTGACGGTAAAATTATCAG
II	1409700	1409765	66	-1	SPBC17A3.04c	SPBC17A3.04c.1:exon:2-SPBC17A3.04c.1:exon:1	int_3666	1	1	0	0	0	1	1	1	U	GAGCCGCUAAC	13	1	dbr1_1	79	51	3.23798	3.5298	40	10.4	6.99652	6.72107	GTATGTATAAAAGAAATAAACAATTGTAGAAATAATGAGTTGTTTCGAGCCGCTAACGCTTCACAG
II	1077967	1078447	481	-1	SPBC1734.10c	SPBC1734.10c.1:exon:2-SPBC1734.10c.1:exon:1	int_3595	1	1	0	0	0	1	1	1	U	GAUUCACUUUC	64	1	dbr1_1	25	14	5.09859	5.07029	3.25	3.75	4.90294	4.99914	GTAAGTATTTTATTTTTTTTTCTTTCCCAAATTTTCTATTCGTTCCTCTTTATTGGCTGTAATGTTCATCCATTACAGTGAGTAAGAATTTTGAATTATCCATTCTACTGCATCGTCTTCATAAATAGCCCTTTCATATAGCTGGGTGTTCTTTTTCTTTTTTTCTTTTTTTTTTTTTTTTTTAATGGGCTTAAAAGAAACCCATGGTTTCGTTTCTTCCTTCCAAACCATGGTGATACATAAGCCCTATAATAATGCAATTTTGTATTTCCATCTGTACCCCTTGTTCCAAAAGAGGGTAATTTGGATACTTTAAATAAATGCAACCTATTTCCAGGTCGCTCATTGCAGAGTCTTGGCATGATGCGGTTAAATAAGTTGTACATGATTGAACAGGAA…
I	1340534	1340825	292	1	SPAC6F12.14	SPAC6F12.14.1:exon:1-SPAC6F12.14.1:exon:2	int_307	1	1	0	0	0	1	1	1	U	UUCUUUAUUAU	67	1	dbr1_1	8	3	3.45245	3.38437	4.5	4	4.25079	4.12757	GTATGCAGAATGCAAGAGGAGCTTTAATTAAAAAATCTATAATTTAAGCATGAAATTATTGCAGAAAACTGTTAATTTTCAGTTTATGATTACTGTAATTTTACTTGTTTGTTATGGATAGCATTATCCTCATTCAAAAGTCCAACGGTTTTGTTGCTATTAGTTTCGAAACCTCATGTAATTCAAAGCAATTCTTCAAGAAATGTTTAACTGAAGTTTTCTTTATTATCTATTGTTGTGTGAAATCATCCTTCCACTTTTAGTTAGCTTCCTTTACTGACGCATTTTTTAG
II	3283467	3283536	70	1	SPBC20F10.01	SPBC20F10.01.1:exon:1-SPBC20F10.01.1:exon:2	int_3107	2	1	1	0	0	2	1	2	U	GAGUUGCUGAC	14	2	dbr1_1;dbr1_2	31	29	4.10418	3.70794	8	15	7.18627	7.0958	GTAAGAAAAAAACAAGAGGAAATTTTCCAGTGCCTAAGTTTATGATAAGGAGTTGCTGACATACCTTTAG
II	2316200	2316611	412	1	SPBC12D12.06	SPBC12D12.06.1:exon:1-SPBC12D12.06.1:exon:2	int_2857	3	1	2	0	0	2	2	2	U;A	CUGGAUGUAUC;CAAGCUGACCU	173;9	2;1	dbr1_2;dbr1_1	5	5	5.22426	5.36018	3	6	2.80474	2.46852	GTAAGGTTATCAATTTTAATTTTAAAGGTTTTACGAGAAGGTAATTGGCCTTTAATTCATTCCTATTCTTCTTTAAAATGTCTTAATTGAGTTTTGAATATCTGCTTTTCTATTTTATTACTGCTGAACATATTCTTGACAAATTGAGGCTTGCGAGTGAGCTGATCTACGTCTAATTACTGATCAGAGGAATAGCTTTTCTGTCTACTTCTAGTCACGAGTATCGACTAAACTGGATGTATCTTGTTTGAGTCATTTTGCGCAAATGTCTTGCAATCACAGTTTATTTCGGCTTCTCATTCGTTTCGTTGACTTTAATTTAAAGCGATTTTAGCCTCTTTGTTAGTTTTTGTTTAAAATATCTTCGAACCTTTATTATTCCTTAGTATACTTTTTCAA…
II	802652	802838	187	-1	SPBC530.06c	SPBC530.06c.1:exon:2-SPBC530.06c.1:exon:1	int_3524	2	1	1	0	0	2	2	2	U;U	GUACUAAUACA;UUUGUACUAAU	20;23	1;1	dbr1_2;dbr1_1	0	0	5.35215	5.49544	0.0212766	0.0243902	4.91296	4.85516	GTATGAATCAAGTTTAGTAAAAATGTGATTCTTTATTGGAAAGTCGACTATATTCACGCCTCTATGAATCAAACTAGCTTATTTTCTTTGAAGTTTTCAAATTAGGAAACTTTAAAGACTTTTCCTTTATTCAAATTAAATTTTTTACACTGCTATATTTGTACTAATACACATGTTATATCTTCAG
II	1160929	1160958	30	-1	SPBTRNAARG.05	SPBTRNAARG.05.1:exon:2-SPBTRNAARG.05.1:exon:1	int_3617	3	2	0	0	1	3	1	2	U	AGUGAAUU	1	3	dbr1_1;wt_2	1662	3416	12.4784	12.8512	2.65231	5.025	10.9043	12.2355	TACGACCTGATCGTTGTTGGGGAGTGAATT
II	2382594	2382662	69	1	SPBC19G7.17	SPBC19G7.17.1:exon:2-SPBC19G7.17.1:exon:3	int_2877	4	3	1	0	0	3	1	2	U	UCAAUACUGAU	13	4	dbr1_1;dbr1_2	123	108	6.00843	6.05063	4.13333	4.03704	7.15221	7.0061	GTACGTATTTCCATTTTGAAAAAGGCTATGGCAGTCCTTTGAACGTTCATCAATACTGATATATCGTAG
II	3301667	3301714	48	1	SPBC20F10.09	SPBC20F10.09.1:exon:3-SPBC20F10.09.1:exon:4	int_3115	1	1	0	0	0	1	1	1	U	UGUACACUAAC	11	1	dbr1_1	254	226	4.24995	3.6673	255	56.75	7.98182	8.07694	GTATGTCAATGAAAATAATAAAGGAATTTTTGTACACTAACTATCTAG
I	1826810	1826964	155	-1	SPAC1002.15c	SPAC1002.15c.1:exon:2-SPAC1002.15c.1:exon:1	int_1568	1	1	0	0	0	1	1	1	G	AUUUAAAGAGA	76	1	dbr1_1	12	15	4.22864	4.45726	2.6	8	3.6443	3.87722	GTGAGTTTAACATTTTTTGTTTGCGCAGTATGCCCTCTTAAAATAGACTCTGTACAATTCGAAGAGAAAAAAATTTAAAGAGATGTAATTAGTTGATAAAGCAGCAAACAACTTCCAATTTGTTGCGTGTAATTTTGCTAATATAGAAAACTTAG
II	3449104	3449370	267	1	SPBC2G2.08	SPBC2G2.08.1:exon:1-SPBC2G2.08.1:exon:2	int_3168	4	1	3	0	0	2	2	2	U;A	UGAGGUUUCAU;GUUACUAAUGU	74;17	3;1	dbr1_2;dbr1_1	12	11	6.07634	6.02023	6.5	6	4.04447	3.69717	GTAAGATAAAGTTTATATTCTAAATTTTCTCTATGCAGATGAGCGTGCATTTCTGTGTTTGTCTTTGACGATAAAATTTTGGTGGTTTGAAAATTGATTTGCGTACATTGCTTAATTCCGTATATTCTTCAATTTTTTTGTCGATACTTAGAAGTTAAAAAATTGTATTGGGCATTGCAGCACGTTTGAGGTTTCATCAGATTTTTTTGCTCTTAAAACTTTATATTTTTATTTCTCTTTGAGGTTACTAATGTAGCGACTAATTAG
III	191403	191525	123	1	SPCC1235.07	SPCC1235.07.1:exon:3-SPCC1235.07.1:exon:4	int_4400	1	1	0	0	0	1	1	1	U	CAAUCACUAAU	14	1	dbr1_1	5	1	1.89241	2.18422	6	2	3.96336	3.51043	GTAAGTTTAAAACACGAACAGGCGAATGTTTTATTCAAGACTTCATCTTAACATATGACACAAAATGAGTTTTCCATTGTTTCAGTTATGTAAATAATCAAGCAATCACTAATATTTTCTTAG
II	1988016	1988080	65	-1	SPBC1A4.06c	SPBC1A4.06c.1:exon:2-SPBC1A4.06c.1:exon:1	int_3768	2	1	1	0	0	2	2	2	U;U	AAACUUCUAAC;UUUAAUCUAAA	19;28	1;1	dbr1_2;dbr1_1	0	0	2.35312	1.96686	1	1	3.33986	3.21664	GTAAATAGTAATTATTAATCGTTATACTCGTTTAATCTAAAACTTCTAACTTATGTCTCTGCTAG
II	2664237	2664475	239	-1	SPBC3E7.04c	SPBC3E7.04c.1:exon:2-SPBC3E7.04c.1:exon:1	int_3915	5	1	4	0	0	4	3	2	U;A;C	CAGAUGCUAAC;UAAUCUGAUAC;ACAGAUGCUAA	11;121;12	2;2;1	dbr1_2;dbr1_1	0	0	5.32637	5.38114	0.333333	0.5	-0.601773	1.27499	GTAAGTGGCTATTTGTGGGATCAAGGTTTCTTACTGTATCGATGCTATATTAGTACAGATTCTAAATGAAAAAGGCCTAGTGAAGGTTGATACAGGGACATTATGAGGCAATAATCTGATACTTTAGGATATAGGTATAGTGGTTTAATTGCAAAATCTCTTTCCGTTTCAATATCTTCGTTCTTTGATGATCAATGCCCAGCATAAGTCTTATATTGAAACAGATGCTAACAGATTAG
II	1036098	1036144	47	1	SPBC337.03	SPBC337.03.1:exon:3-SPBC337.03.1:exon:4	int_2531	1	1	0	0	0	1	1	1	U	UUACUAAUUGC	8	1	dbr1_1	65	33	5.28033	4.8676	3	3.4	4.49608	3.89286	GTATGCCGCAATTCAAATAAAATATCAGAACTTTACTAATTGCATAG
I	842242	842320	79	-1	SPAC2G11.15c	SPAC2G11.15c.1:exon:2-SPAC2G11.15c.1:exon:1	int_1311	1	1	0	0	0	1	1	1	G	UGGGUCUGACA	16	1	dbr1_1	1	0	4.49797	4.31771	2	1	2.77062	3.17792	GTATGTATAATAGCATTCATGTATTAATATCAGTGATTTTGTTGTTTGCATTTGAATGGGTCTGACAAATTATAATTAG
III	2382631	2382701	71	1	SPCC1827.04	SPCC1827.04.1:five_prime_UTR:1-SPCC1827.04.1:exon:1	int_4862	1	1	0	0	0	1	1	1	U	UAAUGCUUACA	14	1	dbr1_1	4	2	3.61806	2.68748	0.625	0.6	1.2925	1.42385	GTACGCTAATTGCTAGATTGAAATTCTACTGAAAATTATTGCATATTTTGTAATGCTTACATTATTTTTAG
III	1609508	1609641	134	1	SPCC777.07	SPCC777.07.1:five_prime_UTR:1-SPCC777.07.1:exon:1	int_4692	1	1	0	0	0	1	1	1	U	ACAAAUCUAAU	14	1	dbr1_1	0	0	7.0202	7.08099	0.0052356	0.00621118	4.99418	5.00588	GTTAAAAAACAATCCCTCTATCTTTCTAAAGACTTTGTTTGGAATTAGCAAAAGCTGAAATTTAAAACATTCCCAAATGATCGTTTATAAACCAAAATTGTTACTGATTGTTTACAAATCTAATGTTGATTTAG
II	1343407	1343498	92	1	SPBC27B12.08	SPBC27B12.08.1:exon:9-SPBC27B12.08.1:three_prime_UTR:2	int_2631	1	1	0	0	0	1	1	1	U	AGGCUACUAAC	22	1	dbr1_1	1	0	2.17385	1.9511	0.666667	0.25	3.81453	3.58427	GTACGTGCAGTCGAATTACTATAGAAAACTGTGTAAATTATTAAAGAAAGCTGTTATTACGCCAGGCTACTAACTTTTAACTGCCACTGTAG
I	4926730	4926794	65	1	SPAPB8E5.10	SPAPB8E5.10.1:exon:2-SPAPB8E5.10.1:exon:3	int_1019	1	1	0	0	0	1	1	1	U	CGGCCACUGAC	16	1	dbr1_1	1	0	0.938087	-0.355051	1	1	0.22575	-16.6096	GTATGTACAATTATTTCCAAACTTCTATTACTATTTAAACAACGGCCACTGACCTATATTTACAG
I	1451005	1451078	74	-1	SPAC3A12.16c	SPAC3A12.16c.1:exon:2-SPAC3A12.16c.1:exon:1	int_1457	2	1	1	0	0	2	2	2	U;A	GAAAUUAUUAA;UUUGCUAAUGA	8;17	1;1	dbr1_1;dbr1_2	28	23	0.751002	2.2652	29	12	4.31584	3.95558	GTAAGTTAAATCAAGTAGTGCAAAGTTGAATGCGCAATAGAATGAAGGCATTTGCTAATGAAATTATTAATTAG
I	2185283	2185471	189	-1	SPAC13F5.07c	SPAC13F5.07c.1:exon:2-SPAC13F5.07c.1:exon:1	int_1638	1	1	0	0	0	1	1	1	U	UUUCUACUGAC	14	1	dbr1_1	4	8	3.39821	2.69002	5	9	1.3101	0.969643	GTAAGGTTTTAGCATAAACTGAAAACAATTGAGATATGAGCGCAAATTCAGTACAGCTGATGGTACTTTCGATAAAATTGCTTCATTTGTTTTTAGCGATTTCGTGGCAGGCGATTGGAAACCATCACAGAACGCTATTTACATGTCTAATATTGTAGAGATATTTCTTTTCTACTGACAAAAATTTAG
II	2795145	2795201	57	1	SPBC32F12.06	SPBC32F12.06.1:exon:1-SPBC32F12.06.1:exon:2	int_2962	1	1	0	0	0	1	1	1	U	AUGAAACUAAC	15	1	dbr1_1	56	25	2.34995	3.41937	19	6.5	5.61271	5.43464	GTACGTTAATTACGATGTATCAGTTCAGTAAATTAATGAAACTAACAATAATAACAG
III	1796683	1796757	75	-1	SPCC1442.17c	SPCC1442.17c.1:five_prime_UTR:2-SPCC1442.17c.1:exon:3	int_5211	1	0	1	0	0	1	1	1	U	CGUAUGCUAAU	13	1	dbr1_2	0	0	0.146679	-0.561499	1	1	-16.6096	-16.6096	GTAAGTTTCTGTTATTTATTTTCATTGAAAATAAAAAAACGCGCTAAAAAAAGTTCGTATGCTAATCAATTCTAG
III	1881727	1882039	313	-1	SPCC297.04c	SPCC297.04c.1:exon:2-SPCC297.04c.1:exon:1	int_5239	2	0	2	0	0	2	2	1	U;U	AGUUUACUAAC;GAAAGGGUAAU	11;142	1;1	dbr1_2	24	11	6.10783	6.09153	12.5	6	4.39363	4.04534	GTAAGGTATTGTAGGATAGCTAGAAGATAGAAGAAAGTTAAAAGTCACTTTAAATTAACTTTTTTGTGTTTCGATTCATTTATATTTATTTGTGTGAATTTTGCTATGAGTTGAGTCAGACAGTAGAAAAAGCAAATGTCGAAGATTGTTGTTGTTGTATAATCGAAAGGGTAATGTTACGGATCAACGATTCACAGCATGATTCATAATCATTTATATAAAAGAAAACATTTCACATTCTTTTCTTTTCTTTAGTAAAATCAGTCGACAGACTGAACGATTGTGTCTAATTATAAGTTTACTAACGCTTTAG
II	2574895	2574942	48	-1	SPBC29A10.16c	SPBC29A10.16c.1:exon:3-SPBC29A10.16c.1:exon:2	int_3886	1	0	1	0	0	1	1	1	U	UUCAUGCUAAC	11	1	dbr1_2	338	272	3.59788	4.08234	42.375	24.8182	6.26917	6.24389	GTAAGAAAATGATTTGTGTACGATGGTTGTTTCATGCTAACAGAACAG
I	2145988	2146042	55	1	SPAC23C11.08	SPAC23C11.08.1:exon:2-SPAC23C11.08.1:exon:3	int_458	2	0	2	0	0	1	1	1	U	UAUUUACUGAC	14	2	dbr1_2	40	58	4.63852	4.4095	3.72727	4.53846	5.55327	6.29115	GTATGGAATCAATAGCAAAAGCCTCATGTATAGTTATTTACTGACCATATAATAG
II	4289144	4289562	419	1	SPBC16A3.05c	SPBC16A3.05c.1:exon:2-SPBC16A3.05c.1:exon:3	int_3340	1	0	1	0	0	1	1	1	U	AUUGAGCUUAC	221	1	dbr1_2	34	23	6.50388	6.73457	35	24	4.60055	4.20787	GTAAGTGATTTCAGTTCTTTATTTGATGTTACTACGTATTTATTATTCCCTGATGCTGCCATGTTATTTGGCAATCGCGATTTACAAATAAAACTCATGTTCGAGGTTAAAATACTTAACACATAAAATATCTTTGTTGTCTTTCAAAAATTTTAATAACTAAATGAACTTTGCGGTTTCTGAAGTATTTTATTGAGCTTACCAAAAATGAACCTCAAACAATTTATTTGGTTTATTAATATGACTTTTTATCATCATCCTATGAAGAATTTTGAAAATCAATCTTCTTAATTGAGCATGGTATTTCTTCTCATTACTAATAATTGAACGATCTGTAAATAATCTTCGTATAACATCTGGATGAACACACCAACAATTGTGCTTGTTTTCTATTTTTCA…
III	1158161	1158216	56	1	SPCC4B3.10c	SPCC4B3.10c.1:exon:1-SPCC4B3.10c.1:exon:2	int_4609	1	0	1	0	0	1	1	1	U	AGUGUGCUAAU	18	1	dbr1_2	0	0	4.56813	4.25226	0.2	1	-16.6096	-16.6096	GTATGTCTTCTTACTTCCTTTGAATTTGTATAGTGTGCTAATTTAATTTACAAAAG
I	2865502	2865555	54	-1	SPAC8F11.07c	SPAC8F11.07c.1:exon:3-SPAC8F11.07c.1:exon:2	int_1802	1	0	1	0	0	1	1	1	U	UAAAAUCUGAC	18	1	dbr1_2	63	58	5.94253	5.79505	8	8.42857	4.60407	4.43692	GTAAGGAATCTACTTACTCTACAAGTCGATAAAATCTGACATGCATGAACGTAG
I	3688807	3689321	515	1	SPAC15A10.06	SPAC15A10.06.1:exon:1-SPAC15A10.06.1:exon:2	int_758	1	0	1	0	0	1	1	1	U	CACAAGCUACU	431	1	dbr1_2	12	9	5.47819	5.49807	13	10	2.76958	2.31597	GTAAGTTTCCGTTATTCTTTACTTTCAGGTGCACATATAGTAAATCGAATACTATAACAGGCTATACGGATGAATGACACAAGCTACTCATTTATAGCATCAGCCATTTTGAAAACGTGCATTTTTTAACTGAACAAAAAATTGAGTTTGGAGTTTTACCATACGAAATGCTTGCCTTTTTTTTCTTCCATTATTTGTCAGTCTTTTTTTCTGCTTAATCGTTTTGGGATAGGATCTCGATCGCTCTTTACTAGCATTCAGTTCGTCAATACATTTTGGCATTGAATTAGCGGTTATGCGTTACGTTACTTTGAATAACTTCGAATGATGTTTTTCTCTTTATATAACATTTGCATTTGCAGCCAGCAATGTAAAATCTTTCGCCTTTCTTTTTTCTTT…
III	910999	911063	65	1	SPCC24B10.06	SPCC24B10.06.1:exon:2-SPCC24B10.06.1:exon:3	int_4568	2	0	2	0	0	2	2	1	U;A	UUACUAAUAUU;AUUACUAAUAU	12;13	1;1	dbr1_2	98	82	5.23576	5.16849	4.30435	2.76667	6.55493	6.52165	GTAAGTCATGCTTGTCATTTTATGGAAACTATTTGTTTGTGTAAAATTACTAATATTATTTTTAG
MT	6845	7925	1081	1	SPMIT.01	SPMIT.01.1:exon:2-SPMIT.01.1:exon:3	int_5360	1	0	1	0	0	1	1	1	U	UAUUGCUUUUC	753	1	dbr1_2	440	275	8.77812	8.7703	0.835227	0.557576	10.1723	10.1091	CAATTTAATAGGCCTCTTAACGTTGCTATATGCTGGAACTACTTGAAAAATACTAGATAAGAGTTTTTGTTTTAAATACTCCAAGAAAAACACCAGATTAGTGTTTATTTTTATAGTAAAAATGTTAAAACAATTAAGTATATCAGCAGGTAACCTTTTGAATAAGGGAACCTCAGAGACTTTACGCAACGAAATCACAACAAAAAAAGTTTCTATTCATCTCCCTAAACACTTAAAACCAGCTAATGATTCTCAATTTGGTCACTATTTAGCAGGTTTAATTGATGGTGATGGTCATTTTAGTAGTAAACAACAATTAATTATTGCTTTTCACTCTTTAGATATACAATTAGCTTATTATATTAAAAAACAAATAGGTTATGGTATTGTACGTAAAAT…
I	722996	723062	67	-1	SPAPJ696.01c	SPAPJ696.01c.1:exon:2-SPAPJ696.01c.1:exon:1	int_1272	1	0	1	0	0	1	1	1	U	CGAUUUCUAAC	11	1	dbr1_2	11	2	4.35379	4.40856	3	0.5	5.25123	5.24758	GTATGTGTGTAACGTCTGTAGTTTATTTTCCCTCCAATACTTAACTCTTCGATTTCTAACTTCGTAG
I	636315	636384	70	1	SPAC1F3.09	SPAC1F3.09.1:exon:4-SPAC1F3.09.1:exon:5	int_106	1	0	1	0	0	1	1	1	U	UUUAUACUAAC	11	1	dbr1_2	8	1	5.15309	5.0926	1.28571	0.181818	2.84299	2.64938	GTACGTTTATACACTCCAATGTTTGCGACACGCTGTTTAAATTTTACTCTTTTTTATACTAACGACTCAG
I	1444933	1445058	126	1	SPAC3A12.14	SPAC3A12.14.1:exon:1-SPAC3A12.14.1:exon:2	int_325	2	0	2	0	0	1	1	1	U	GAUUGACUAAC	73	2	dbr1_2	449	372	6.36975	6.18187	64.2857	53.2857	7.18209	7.26791	GTATGTTTATTATATTGTTTGGACATATTCCGATTTTTCCTTTGAAGATTGACTAACAATCGTATGAACGGATGACACTCAGAAAATGATTTCTGAAGTCGTCTACCGTATCGTACATTATTACAG
I	2883490	2883541	52	-1	SPACUNK4.14	SPACUNK4.14.1:exon:4-SPACUNK4.14.1:exon:3	int_1809	3	0	3	0	0	2	2	1	U;A	GAUAGGCUAAU;UAGGCUAAUGA	15;13	2;1	dbr1_2	11	7	0.675054	3.28879	12	4	3.60527	3.57073	GTAAGTGAAAGATGGAGAATATCTAGTTATGATAGGCTAATGATTTAAATAG
II	1500377	1500444	68	1	SPBC11B10.09	SPBC11B10.09.1:exon:1-SPBC11B10.09.1:exon:2	int_2678	1	0	1	0	0	1	1	1	U	CGUAUACUGAC	13	1	dbr1_2	39	24	4.09538	4.1034	5.71429	6.25	5.29396	4.80336	GTAGGTGTAACTGAGGAAGCTATGACTTATCCAATTTCTTTTCTGTCACGTATACTGACTAATGCTAG
I	793610	793658	49	-1	SPAC16C9.02c	SPAC16C9.02c.1:exon:2-SPAC16C9.02c.1:exon:1	int_1296	1	0	1	0	0	1	1	1	U	GAUUUGCUAAC	15	1	dbr1_2	104	94	3.0827	2.05259	35	31.6667	6.78182	6.63742	GTATGATGAAGATTAACTGGAAGTTGGGATTTGCTAACGTTTTATTCAG
II	2348812	2348897	86	1	SPBC19G7.02	SPBC19G7.02.1:exon:2-SPBC19G7.02.1:exon:3	int_2868	1	0	1	0	0	1	1	1	U	CAGAUAUUUAA	22	1	dbr1_2	6	4	1.94922	1.56297	1	1.25	4.36132	4.39389	GTAAGTACCGAGATAACTAATGTCTTTTTTACACATTTTTTAAAAGCTTGAATAAGCCAGATATTTAATTAACCTCCTTTATACAG
II	2960526	2960619	94	1	SPBC2A9.13	SPBC2A9.13.1:exon:1-SPBC2A9.13.1:exon:2	int_3003	1	0	1	0	0	1	1	1	U	GGCAUGCUAAA	16	1	dbr1_2	2	1	5.1063	5.50503	0.6	0.285714	1.16604	0.457856	GTATGTTAGGAATTTTCGTTATTTAGGAAGAATGAAAGTCTTTTACATGTCGGGTCTTTCAGTTAATGTATGGCATGCTAAACTTTGTATACAG
II	3157718	3157859	142	1	SPBC609.01	SPBC609.01.1:exon:1-SPBC609.01.1:exon:2	int_3049	1	0	1	0	0	1	1	1	U	AAUAAGUUUUU	94	1	dbr1_2	0	0	4.51114	4.13226	0.5	1	1.2551	0.6128	GTAAGTTTTGTCAAGTTCGATGAAGTATCCTGCAACTATGAAATAAGTTTTTCTTTGAATTTTGAATTTTTTTTTTTCATCTTGCTAGATTCTTCAGCTTTTTTCTTCTACCAGAGTATTTATCACTAACTCAGTTATTTAG
I	4752035	4752157	123	-1	SPAPYUG7.04c	SPAPYUG7.04c.1:exon:3-SPAPYUG7.04c.1:exon:2	int_2210	2	0	1	0	1	2	2	2	U;A	CAUCAGCUAAU;AUAUCUCAUCA	12;18	1;1	wt_2;dbr1_2	71	70	4.6228	4.04671	24	35.5	5.99842	6.2329	GTAAGCTTGTTTTTTTCTCCTACTGGGTTTATTCACTTCAAGAAAAAAATTCGAAGTTCTTTTCGATTACTTTTTTCCTCATCATTTGGAAGTTTTAAATATCTCATCAGCTAATTTGTATAG
I	346052	346113	62	-1	SPAC12G12.02	SPAC12G12.02.1:exon:4-SPAC12G12.02.1:exon:3	int_1184	1	0	1	0	0	1	1	1	U	AAGAUACUAAC	12	1	dbr1_2	84	61	5.036	5.07065	28.3333	62	3.29074	2.95593	GTATGTTTGTATTTTCGACTTCATTTCAACTATCAACTTGGCTAAGATACTAACCTATTTAG
I	4500960	4501022	63	1	SPAC1851.02	SPAC1851.02.1:exon:1-SPAC1851.02.1:exon:2	int_912	1	0	1	0	0	1	1	1	U	ACUGACUUACA	15	1	dbr1_2	41	60	3.20556	1.69002	6	61	6.3638	6.60792	GTAAGCATACCTCAAAATATACTTCTTTATGATAAAAAATAACTGACTTACAATTTTAATTAG
III	1664645	1664758	114	-1	SPCC1902.02	SPCC1902.02.1:exon:2-SPCC1902.02.1:exon:1	int_5189	1	0	1	0	0	1	1	1	U	UUUUUGCUAAC	13	1	dbr1_2	41	23	4.06616	3.64176	14	12	5.59788	4.6673	GTATGGTTTTTTTTTGTTTAAACTGCGTGTTATTTTATTTTTTGTATTGAATATCGCGTGCATTAATTTGATCGCTTTTAAAAAATTTATAATTTTTTTGCTAACGTGCTTTAG
II	2320102	2320172	71	-1	SPBC12D12.08c	SPBC12D12.08c.1:exon:3-SPBC12D12.08c.1:exon:2	int_3840	1	0	1	0	0	1	1	1	U	UCAUCUAUGUU	21	1	dbr1_2	58	57	3.54767	3.97698	59	29	7.06354	7.33026	GTTCGTGTTTTAAATGTTGAAAACATTTATATGCAGTTATAATTCATCTATGTTTCTAACCAAAATATAAG
I	3666224	3666979	756	1	SPAC8C9.14	SPAC8C9.14.1:exon:2-SPAC8C9.14.1:exon:3	int_755	1	0	0	1	0	1	1	1	U	UGUUAUUUAAC	661	1	wt_1	24	14	4.92959	4.8566	0.833333	1.25	5.39143	4.8193	GTAAGAAATCCTTGAAAATTTGTTTGCTGGATGTAAAAGAGAGAAGAAAGGAAGAATGAGTTATCATTATATTTATCGCCGCCATTGTTGTTATTTAACCAGAGAAAGCATTCTACTTTTATTGTTTATCCTCGAAAAGCTAGTAAAAGAGGGGAGATTTTTTTTGAAGGTTTGCTAAAAAATAATTTTTTTACTATTCTTGATTTGTTTCCTTTTTCTTTCTGATTACAACTTGAATTAAAAAGGATTGACAATGATGGGAAAGGAATCTTTTGAGGCAGCAAGAGATTCCTATCGCAACAATCGGGTTGTTTTATTACAAAAATCGCTTTTCTTTTTGAAATAAAACAATTCTATTCGTTGTTTTCTTTTTAGTATTACCAATGTTACGCTGAAAAA…
I	823785	823893	109	1	SPAC2G11.09	SPAC2G11.09.1:exon:1-SPAC2G11.09.1:exon:2	int_175	1	0	0	0	1	1	1	1	U	AAAUUGCUAAC	69	1	wt_2	49	34	4.27973	4.4537	6.25	8.75	5.27842	5.00104	GTAAGTATACCTATCCTTCCCTCATTTGTAACAAAATTGCTAACGTTGTTTGAATCTTCGATCTGCGGGTGTTAATTCCTACAGATTCGAGATTCATCGCTGAAAACAG
I	3347056	3347120	65	1	SPAC26A3.08	SPAC26A3.08.1:exon:1-SPAC26A3.08.1:exon:2	int_689	1	0	0	0	1	1	1	1	U	UUGUUGCUAAC	15	1	wt_2	99	75	5.18601	5.03725	25	38	5.63614	5.6238	GTATGTGGCATTTGGAACTTATATACGATTCTAAAATTTTCGATTGTTGCTAACTGCAAGTTTAG
I	2227120	2227192	73	-1	SPAC18G6.05c	SPAC18G6.05c.1:exon:2-SPAC18G6.05c.1:exon:1	int_1646	1	0	0	0	1	1	1	1	U	GUGAAGUUCUU	27	1	wt_2	63	66	2.77062	2.28483	16	16.75	6.51228	6.37131	GTAATTTAGACTTCTAGACTACTAATTTTATGAAAACTGGTGAAGTTCTTTTTGTTCTAACTTTTCATTTCAG
I	2866236	2866288	53	-1	SPAC8F11.08c	SPAC8F11.08c.1:five_prime_UTR:2-SPAC8F11.08c.1:exon:2	int_1804	1	0	0	0	1	1	1	1	U	CGUUUACUAAC	11	1	wt_2	10	8	-16.6096	-16.6096	11	9	3.24996	3.40427	GTATGTCAATATAGTAAATTCCTTATTTCGTTAATCGTTTACTAACCCGCCAG
I	3377217	3377279	63	1	SPAC8E11.07c	SPAC8E11.07c.1:exon:1-SPAC8E11.07c.1:exon:2	int_693	2	0	0	0	2	1	1	1	U	AAUUUUCUGAC	20	2	wt_2	99	73	5.62702	4.97542	1.88679	3.89474	6.1361	5.84647	GTAAGTTTCCTTTTTGGATCGCGATTTTGTAGATGGAATTTTCTGACCTCAACAATTGTTTAG
II	3634160	3634228	69	-1	SPBP8B7.01c	SPBP8B7.01c.1:exon:3-SPBP8B7.01c.1:exon:2	int_4179	1	0	0	0	1	1	1	1	U	UUGUUACUAAC	14	1	wt_2	18	8	5.12494	5.60317	6.33333	1.5	4.9362	4.89996	GTATGCGGATTTTAACATTGCGAGCAAAAAAGAATTTACATGAATGTATTGTTACTAACATAGCTGTAG
I	4688463	4688512	50	-1	SPAC144.17c	SPAC144.17c.1:exon:2-SPAC144.17c.1:exon:1	int_2196	3	0	0	0	3	1	1	1	U	CCUUUGCUAAC	13	3	wt_2	15	7	0.731637	1.60841	5.33333	2.66667	4.60334	4.44746	GTAAGCTGAAACTATAGTCGACGTTTTGTACCTTTGCTAACTTATAACAG
I	3094174	3094228	55	-1	SPAC16A10.08c	SPAC16A10.08c.1:exon:2-SPAC16A10.08c.1:exon:1	int_1838	1	0	0	0	1	1	1	1	U	UCAUAACUGAC	15	1	wt_2	22	11	4.29457	4.34537	3.28571	2	3.76393	3.69125	GTACGTGGGTGTATTTAAAAAATGTAATCATGATCATAACTGACCAAGCGAATAG
I	334783	334829	47	1	SPAC12G12.07c	SPAC12G12.07c.1:exon:1-SPAC12G12.07c.1:exon:2	int_30	2	0	0	0	2	1	1	1	U	AACUUACUAAA	11	2	wt_2	18	4	2.40586	3.69767	6.33333	2.5	6.62341	6.62371	GTAAGATCATTTATTAAATTGGGCGTTAAAACTTACTAAATCTGTAG
II	2921579	2921643	65	1	SPBC1703.04	SPBC1703.04.1:exon:2-SPBC1703.04.1:exon:3	int_2986	1	0	0	0	1	1	1	1	U	GGUUUACUAGC	16	1	wt_2	0	0	2.52304	0.64494	0.5	0.5	2.58889	1.36613	GTAAGTGAAATGTTGCTTTCATAAAGTTTCTACTTAGTCTCTGGTTTACTAGCTATTTTTAACAG
III	1930815	1930864	50	-1	SPCC74.03c	SPCC74.03c.1:exon:4-SPCC74.03c.1:exon:3	int_5250	1	0	0	0	1	1	1	1	U	CUCUUGCUAAA	13	1	wt_2	9	12	2.90156	3.48288	10	4.33333	4.26895	3.78466	GTATGTTTGGCCACTTTTTTTTCTACTTATCTCTTGCTAAACGTATTTAG
III	493550	493599	50	-1	SPCC970.09	SPCC970.09.1:exon:5-SPCC970.09.1:exon:4	int_4954	1	0	0	0	1	1	1	1	U	CCCAGCUUACC	12	1	wt_2	2	0	3.90155	3.02344	1	1	3.38371	2.97098	GTATGTTTCATTTCCATTTTTTCACTGTTTCCCCAGCTTACCCTTTATAG
II	1055714	1055751	38	1	SPBC337.14	SPBC337.14.1:exon:1-SPBC337.14.1:exon:2	int_2537	1	0	0	0	1	1	1	1	U	CUGUUGCUAAU	12	1	wt_2	96	85	8.08175	7.81169	1.34722	1.56364	6.35586	6.13027	GTTGGATTTGAATTTTATTCTGTTGCTAATATAAAAAG
II	539454	539522	69	1	SPBC649.04	SPBC649.04.1:exon:1-SPBC649.04.1:exon:2	int_2443	1	0	0	0	1	1	1	1	U	AUUUUACUAAC	18	1	wt_2	10	8	3.26696	3.36613	1.83333	1.125	5.16816	5.01846	GTATGGAATTTGTTATGCAGCTCAGTTGCAACAATTTATTCAGGATTTTACTAACAGCTTCAATTTTAG
I	1506584	1506640	57	-1	SPAC5D6.04	SPAC5D6.04.1:exon:4-SPAC5D6.04.1:exon:3	int_1470	1	0	0	0	1	1	1	1	U	UGUUUACUAAC	11	1	wt_2	4	1	3.79052	2.41937	2.5	1	4.82496	4.41122	GTACGTACCTTACCTGCAAGAATATTGTTCGTTTGTTTTTGTTTACTAACTCTTTAG
