# Supplementary material for: LaSSO, a strategy for genome-wide mapping of intronic lariats and branch points using RNA-seq
Source: HighWire-hosted journal article supplement (doi:10.1101/gr.166819.113), 2014-04-07
Supplement: Supplemental_Table5.xlsx [file Supplemental_Table5.xlsx]

## Sheet: Supplementary Table 6
Supplemental Table 5. Branch sites identified by LaSSO using RNA-seq dataset in this study
Branch-point index: distance of branch-point from 3' splice acceptor site
BP: Branch-point; BS: Branch-site; Lar: Lariat; SplEff: Splicing Efficiency; Int_seq : Intron sequence; sur_exons; flanking exons
Chromosome	start	end	width	strand	gene	sur_exons	int_id	LarReads	LarReads_dbr1_1	LarReads_dbr1_2	LarReads_wt_1	LarReads_wt_2	LarSequences	NoBranches	NoSamples	BranchpointLetters	BranchSites	BranchPointIdx	BranchPointReads	Samples	JunctionReadsDbr1_1	JunctionReadsDbr1_2	IntronicExpressDbr1_1	IntronicExpressDbr1_2	SplEffDbr1_1	SplEffDbr1_2	ExonicExpDbr1_1	ExonicExpDbr1_2	Int_seq	FELINES_BS	PrimaryBS_Seq_LaSSO	PrimaryBP_idx_LaSSO	PrimaryBP_reads_LaSSO	SecondaryBS_Seq_LaSSO	SecondaryBP_idx_LaSSO	SecondaryBP_reads_LaSSO	AdditionalBP_LaSSO	SecondaryBS_CloserTo3PrimeEnd	LaSSO_FELINES_Agree	PrimaryBranchDifferentFromConsensus_LaSSO	SecondaryBranchDifferentFromConsensus_2DLarSeq	BranchDifferentFromConsensus_FELINES	PrimarBranchDifferentFromConsensus_LaSSO	SecondaryBranchDifferentFromConsensus_LaSSO
I	2404251	2404366	116	-1	SPAC1B9.02c	SPAC1B9.02c.1:exon:2-SPAC1B9.02c.1:exon:1	int_1694	212	129	83	0	0	74	2	2	A;A	UUGGCUAACCU;CUUGGCUAACC	11;12	189;23	dbr1_1;dbr1_2	55	50	6.16136	6.0761	28	12.75	6.36876	6.13363	GTATGTTATAATTGATTTTTTGCTTGAAAGACAATCTTCCCCATAGCTTTCTTTATTGTGTTTTTCAAAAATCACTGTCTCCATAAATTGTTGTTCACTTGGCTAACCTATCATAG	GGCUAAC	GGCUAAC	11	189		NA	NA	NA	No	YES	No	No	No	NA	NA
II	2793728	2793818	91	-1	SPBC32F12.05c	SPBC32F12.05c.1:exon:3-SPBC32F12.05c.1:exon:2	int_3956	97	57	39	0	1	46	2	3	A;A	UAUUCUAACCA;GUAUUCUAACC	11;12	89;8	dbr1_1;dbr1_2;wt_2	13	20	5.39125	5.51706	7	10.5	2.53114	2.75584	GTACGTCCTAGATTGTTTTATTAGCAAATTTAATTAACTTGCTAAACTTGATTCCGCTTTTATCATTTCTGTGTATTCTAACCATGAATAG	UUCUAAC	UUCUAAC	11	89		NA	NA	NA	No	YES	No	No	No	NA	NA
I	5359195	5359550	356	1	SPAC4D7.05	SPAC4D7.05.1:exon:2-SPAC4D7.05.1:exon:3	int_1113	804	428	375	1	0	144	2	3	A;A	GUUACUAACUG;GGUUACUAACU	10;11	684;120	dbr1_1;dbr1_2;wt_1	619	439	10.3093	10.4774	19.375	16.2963	9.209	9.07374	GTACGTGAAAATTGGTGGTGATGTATGTTGGATTAAGACATCTAAAGGTATACGGATTATGGAAGTATAAGGAAACACGAATAATGAAACATATCATGACTCTAATAAATGTATTTTTTTTATTAGTCGTCCGATTGCAGATGGTTATACTCGTGATCCACGATTCTGAGTTGGCGTAGTACTTAAAGTTAAATATGCATGGTGCATCTCCTTTACTTATATTAATGCTACGTTTACCTCACTTCACTTCCTCGTGGAAAGCATTTAAACTTCTTTTAAATCCTTTTCCTTCTTCTTGATGCCTCAAATCCAACTAGATCATCTGTTCCTTTTCCAATGGTTACTAACTGAAACAG	UACUAAC	UACUAAC	10	684		NA	NA	NA	No	YES	No	No	No	NA	NA
II	1377910	1378223	314	-1	SPBC8D2.10c	SPBC8D2.10c.1:exon:2-SPBC8D2.10c.1:exon:1	int_3656	50	33	17	0	0	33	3	2	A;A;A	AAUACUAACUC;AAAGUUAAUAC;UAAUACUAACU	11;17;12	47;2;1	dbr1_1;dbr1_2	15	13	8.95738	8.49486	16	14	4.07593	3.98923	GTATGAATAATATGCTTGGCTGTTGTACTGGTCTGAAATCAATGTTTTTTACTTCTGGGGGAATTTGTTGCTTGTTTAGTTAATACTGGAATTCCATGCTATCTTTTTGCGATTATTGCTTGACATGAATGGATATTCATCTCTATCAGTCAATGATGAATGATCCGATTTCCTGGATTGAACATTATTATTCAGGATTTGCTCAATTCCCCTGGGACACGGTTTTCGTTTTTTCTGCTGCTACCCTTTCTTTGAAAGACGATGCATCCCAGCTTTCAAATGGAAACAATAAAGTTAATACTAACTCTTAATAG	UACUAAC	UACUAAC	11	47	AGUUAAU	17	2	NA	No	YES	No	No	No	NA	NA
I	4485597	4485712	116	-1	SPAC17C9.08	SPAC17C9.08.1:exon:2-SPAC17C9.08.1:exon:1	int_2165	51	26	25	0	0	26	2	2	A;A	UAUAUUAAUAA;UUAUAUUAAUA	12;13	46;5	dbr1_1;dbr1_2	63	45	8.74872	8.70716	21.3333	5.75	6.19861	6.18654	GTAAGCAAAAACACCGTTTCCTAAGCTTTCTTTACCTAGGAATTATAGATCACGGCAATAGATTAAATGTTTAAATTTCTGGTCTCTCGGAGTGCATTATATTAATAATAAACTAG	UAUUAAU	UAUUAAU	12	46		NA	NA	NA	No	YES	No	No	No	NA	NA
I	895408	895596	189	1	SPAC22H12.02	SPAC22H12.02.1:exon:1-SPAC22H12.02.1:exon:2	int_185	1082	676	404	0	2	148	1	3	A	UGAACUUACAA	11	1082	dbr1_1;dbr1_2;wt_2	123	120	8.80547	8.42811	5.16667	5.7619	4.09187	4.02395	GTATGAAAGCCATCTGATTCATTTGCTACGACCGAGGCGCGTTATTTGACCCAATGGTCAAGGTTAGGTGCAATTACAAAAAACTTTGGCATTATACAGGATGCTCGTACAATTGAATTTAGAAGAACAATAAAAAACAAAACTTTTTCTTGCAAGTATCTTGATGAACTTTGAACTTACAATATTTAG	AUCUGAU	AACUUAC	11	1082		NA	NA	NA	No	No	No	No	No	NA	NA
I	5369560	5369727	168	-1	SPAC4D7.10c	SPAC4D7.10c.1:exon:3-SPAC4D7.10c.1:exon:2	int_2345	22	12	5	1	4	15	3	4	A;A;A	AUUACUAACCC;AUCGCUGAGUG;UAUUACUAACC	8;63;9	16;5;1	dbr1_1;dbr1_2;wt_1;wt_2	3	0	8.74472	8.8637	4	0.5	3.73806	3.83977	GTAAGGCAATTTAATTTTCAAAACAAATAACCGTTCTGCTTTGCAATTGATGAAATATTTGCTTATGATCAATAAATGATTCTTTTATTATCACCAAGATCGCTGAGTGCTAAAGTTTTTGGTTATTTTATTTGTTTTAAATATTTTCGAGTTATTACTAACCCATAG	UACUAAC	UACUAAC	8	16	CGCUGAG	63	5	NA	No	YES	No	No	No	NA	YES
I	2146171	2146325	155	1	SPAC23C11.08	SPAC23C11.08.1:exon:3-SPAC23C11.08.1:exon:4	int_459	53	22	31	0	0	38	2	2	A;A	UUUUCUAACAU;CUUUUCUAACA	13;14	42;11	dbr1_1;dbr1_2	25	24	7.44587	7.75968	26	12.5	3.93007	3.91523	GTAAGGAAAAATTCTTTATTTGAATGGTGATACGTGTACTTCTACTTCCTTGTTGGCTTAGAGATTTAAATTGTCTCAAGCAATGAAGGCGCAACAATTCATTCACTCATACCAAAATTTCATTCTCATAGTCACTTTTCTAACATCTACTCTAG	UUCUAAC	UUCUAAC	13	42		NA	NA	NA	No	YES	No	No	No	NA	NA
I	1700960	1701097	138	-1	SPAC824.09c	SPAC824.09c.1:exon:5-SPAC824.09c.1:exon:4	int_1521	43	22	21	0	0	28	1	2	A	UUUUCUGACCU	12	43	dbr1_1;dbr1_2	39	37	6.02851	5.89862	13.3333	12.6667	6.90077	6.39062	GTAGGTTTTTATTGATAATCCTTAGCATAGCTGGCATTGAATGTTATCTTTCTAGGCTACATACCCTTTACACGTTGCTAGCAAATTGGAAGCTTCTTTTTTGTTTTTTTTACTGCATATTTTCTGACCTAGATTTAG	UUCUGAC	UUCUGAC	12	43		NA	NA	NA	No	YES	No	No	No	NA	NA
III	1427311	1427631	321	1	SPCC622.14	SPCC622.14.1:exon:1-SPCC622.14.1:exon:2	int_4661	109	73	36	0	0	68	3	2	A;A;A	CUGACUAACUU;CCUGACUAACU;GCUCCUGACUA	12;13;16	79;25;5	dbr1_1;dbr1_2	63	48	7.17834	7.22809	3.04762	3.0625	6.47747	6.46807	GTAAGCATCAGGATTGATACGGGCTATTGGAGTTTGTTGGTTATTTTACCAAAAAAAAAACATATATATATAATAATTCATTTGGCTGAGAGGGTAGCGCTATTGATCTGCGAGTTTGCTTGCCGCTATTTCGAATTTTTTCCAAGTCATTTAGTGCCTTTTTTTGACAAGAATAATGTTTAATGTTAAAAACAAGTACATGACGCGCAATTGATTATCACCTGAAGTTATAAAATGCAAGCTCACTATAATTTCATCAATGACTTGAAACAACATATATAGCCCACATTTGTTGCATGCTCCTGACTAACTTCTATACAG	GACUAAC	GACUAAC	12	79	UCCUGAC	16	5	NA	No	YES	No	No	No	NA	NA
I	5332284	5332391	108	-1	SPAP8A3.09c	SPAP8A3.09c.1:exon:4-SPAP8A3.09c.1:exon:3	int_2334	371	220	151	0	0	76	2	2	A;A	UCGGCUAACAU;GUCGGCUAACA	17;18	369;2	dbr1_1;dbr1_2	24	16	5.56311	5.3218	6.25	2.83333	5.92926	5.80422	GTATGCATTCAATAATAAAATTATGGAACTATAGGTTTAAATTTTTAAAATTCTTTATATTTTTTAATAAACGATGTATGTTTGTCGGCTAACATTCCTTGAATACAG	GGCUAAC	GGCUAAC	17	369		NA	NA	NA	No	YES	No	No	No	NA	NA
III	2201853	2201988	136	1	SPCC830.10	SPCC830.10.1:exon:3-SPCC830.10.1:exon:4	int_4824	42	29	13	0	0	25	2	2	A;A	CCUUCUAACGC;ACCUUCUAACG	10;11	36;6	dbr1_1;dbr1_2	42	28	5.88793	6.12673	5.375	2.41667	5.99697	5.93033	GTAAGTTCAAATGATGGTTTAGGATTATGCTGATCAATGCAACGAATTATTATCGCAATGGTTATTCGATTGAATCTTGTTTTTACTTCTCTTTGTCATTCTTCATTTTATCGGAGCAACCTTCTAACGCTAATAG	CGCUAAU	UUCUAAC	10	36		NA	NA	NA	No	No	No	No	No	NA	NA
I	756882	756988	107	-1	SPAC4G8.02c	SPAC4G8.02c.1:exon:2-SPAC4G8.02c.1:exon:1	int_1281	19	9	10	0	0	10	2	2	A;A	AUUACUAAUAG;UAUUACUAAUA	9;10	16;3	dbr1_1;dbr1_2	38	17	4.46691	5.26568	19.5	2.57143	5.79751	5.40706	GTATCGTAGTTATAATGAATACTCAATGAAATTGAGAGTTTGCTATTATCTTCTCTTTCATACCCTAGCAAAATAATTATTCATACGAGCTATTACTAATAGAACAG	UACUAAU	UACUAAU	9	16		NA	NA	NA	No	YES	No	No	No	NA	NA
III	408694	408757	64	-1	SPCC306.02c	SPCC306.02c.1:exon:2-SPCC306.02c.1:exon:1	int_4935	3	3	0	0	0	3	2	1	A;A	UUCACUAACGC;AUUCACUAACG	14;15	2;1	dbr1_1	54	39	4.7678	4.83722	6.11111	3.07692	5.71348	5.49593	GTATGAATTAATGAACTATGAGTAGTAAACTTGAAAAGATCAATTCACTAACGCAAAATGGTAG	CACUAAC	CACUAAC	14	2		NA	NA	NA	No	YES	No	No	No	NA	NA
I	3384338	3384744	407	1	SPAC8E11.02c	SPAC8E11.02c.1:exon:1-SPAC8E11.02c.1:exon:2	int_700	953	546	407	0	0	106	4	2	A;A;A;A	AUCACUAAUAU;UGUACUUAUCA;UAUCACUAAUA;UUUCCUAACUU	10;17;11;125	875;43;33;2	dbr1_1;dbr1_2	808	631	11.5951	11.5313	17.9778	19.1515	8.85341	8.75705	GTATGTGCTTTTATAAGGTTTAGAGACGCGTAGAGCAGAGATATATTTGGTGTTATTTCTGCAAGAACAAAATTACACACATCCAAGGTTCTATCGGCGGAAGCTTTTGAGTAAGCGGGCTTCCTGTAAAACATCGATTGCATTTATTTTTGACATAGTTGTGATCAGAGGCTTAGTTGGTAGAATGTTTGTGTTTGTGTGTTGTATGGTGGTTGTCAAATGAACTGTGCATTGGCTATGGTGATGTTGAAAAGGTGTTTTAGTATTTCAACTTGTTTCCTAACTTTATTTCTAATTGTTTTTACTCCGAGAAGAAATTTTTTTGTTCATACAGACATACGGAAAATACATCATGCTGCGCATCTCGAAAGTCGAAATCCTTATGTACTTATCACTAAT…	CACUAAU	CACUAAU	10	875	UACUUAU	17	43	NA	No	YES	No	No	No	NA	NA
II	1167801	1168061	261	1	SPBC409.15	SPBC409.15.1:exon:1-SPBC409.15.1:exon:2	int_2576	104	78	26	0	0	41	2	2	A;A	UCUAUUAACAG;GUCUAUUAACA	13;14	100;4	dbr1_1;dbr1_2	36	44	10.9852	10.7729	9.25	9	5.69345	5.64238	GTAAGTATTCACCAATACTAAATTAGGTAAAGATTTTTTTCAAACAAGAAAGAACGTAACAAGCTTGCTTGAGACTGAAGATTCGTATATATATATTGGCACCGAAAAAATGATTTAAGTTTGAGGACGAAATATTGGAATATTAGTCAAAAGCTCGAGTTTATACACATATTGCGTTCTGTTGTCTATATTAAAAATTTTTTACTTCTATTAGCATTTAAAATAATTATCAAGTGATACGTCTATTAACAGTCTATTTAG	UAUUAAC	UAUUAAC	13	100		NA	NA	NA	No	YES	No	No	No	NA	NA
II	535459	535631	173	1	SPBC649.02	SPBC649.02.1:exon:1-SPBC649.02.1:exon:2	int_2442	1082	650	428	1	3	237	8	4	A;A;A;A;A;A;A;A	GUUUCUAACUG;AGUUUCUAACU;AUAAAGCAAGU;CUAACUGAUCC;UAAAGCAAGUU;UUUACUCACUC;GAAUAAGAUUG;GGUUUUCAUCU	12;13;21;8;20;42;99;121	837;214;21;3;3;2;1;1	dbr1_1;dbr1_2;wt_1;wt_2	286	217	10.26	10.2386	17.9375	18.1667	8.1245	8.17253	GTAGGTAGAAGATTGAGCTGTTAATGGGAACTTTTGGTTGTAGAAGGTTTTCATCTGTCTGATCACAGAATAAGATTGTTTAGCATACGTGTGAAATTGACAGTGAACTTGTAGCTTATTAACATTTACTCACTCATTTCTTTCTATAAAGCAAGTTTCTAACTGATCCGTAG	AACUGAU	UUCUAAC	12	837	AAAGCAA	21	21	NA	No	No	No	No	No	NA	YES
I	2216242	2216485	244	1	SPAC18G6.03	SPAC18G6.03.1:exon:1-SPAC18G6.03.1:exon:2	int_472	723	375	346	1	1	138	4	4	A;A;A;A	UUAACUAAUGU;AUAAUUAACUA;AUUAACUAAUG;CAUAAUUAACU	12;16;13;17	509;197;10;7	dbr1_1;dbr1_2;wt_2;wt_1	112	80	10.2059	10.2304	9.41667	10.125	7.1249	7.47282	GTAAGTAATTTTGTTGGTGAGATATGGAGTTGTTCGGACGGGAAGTAGTGAAACCGGCTTTAGCCGCTCTCACTTTATTCCGTTCATCGTTTTTAGCAATTTTGAACTGCTTGAAGCGTAGAAGATCTCTTTTTGTTTTGAAATATTATTCACCTTGTCGATTCCATTCTCTGTTTATTAAGCACATTTGTTTGCCTCTGATTCGTCATAATTTTTTGAACATAATTAACTAATGTTTTTACAG	AACUAAU	AACUAAU	12	509	AAUUAAC	16	197	NA	No	YES	No	No	No	NA	NA
I	3530471	3530614	144	1	SPAC16E8.16	SPAC16E8.16.1:exon:1-SPAC16E8.16.1:exon:2	int_733	212	128	84	0	0	69	2	2	A;A	UUGGCUAACCA;AUUGGCUAACC	12;13	190;22	dbr1_1;dbr1_2	121	133	7.47469	7.43989	1.71831	2.5283	6.74444	6.62641	GTGCGTTCATATTGTAGTATAGTTTCAGCTCCTAGTCTAGTGTTGCTGTTTTGTAGTTTATATGATCGTAGAAAGCTAGTGATTAGGGGCTTTTAATATGAAATGATTTGTTTATGTGTAATACATTGGCTAACCACATATCAG	GGCUAAC	GGCUAAC	12	190		NA	NA	NA	No	YES	No	No	No	NA	NA
I	4224251	4224581	331	1	SPAC1F7.04	SPAC1F7.04.1:exon:1-SPAC1F7.04.1:exon:2	int_860	1799	1111	687	0	1	275	3	3	A;A;A	ACUUCUAACAU;AACUUCUAACA;UUAUACAACUU	16;17;23	1402;392;5	dbr1_1;dbr1_2;wt_2	253	169	11.0791	10.843	23.0909	13.0769	7.39743	7.18568	GTAAGTAAAAATGGTGCAAGCGTCGGAAAGGTAGTAGAAGGGTAAAGTAGTTGCTTGGGCCTGTTTTAAATTGGCAAGGGTTTACATCTCTTGCTTAGCATGGCTGGAGAAGAAAATTATTTCCGTAAGCATGTTCATTGCCTCAAGAAAATAATGAAAGAATCCCCATAGAAATGAGACTTAGATGGGGTTTAGATTACATTTAATAAATGTTCCGAGGATTTAATTTGCACTCCGTACCCTGTATTTCTACTTACTCTTTGCTTGCTTATCTGCAATGTTTCACGAGTCTGTGTCATTGTTATACAACTTCTAACATTTTTCTTTATAG	UUCUAAC	UUCUAAC	16	1402	AUACAAC	23	5	NA	No	YES	No	No	No	NA	NA
II	1729233	1729477	245	1	SPBC2F12.05c	SPBC2F12.05c.1:exon:3-SPBC2F12.05c.1:exon:4	int_2730	96	68	28	0	0	52	2	2	A;A	AUAAUUAACAU;AAUAAUUAACA	16;17	81;15	dbr1_1;dbr1_2	27	14	7.48461	7.30998	0.777778	0.681818	5.41659	5.23267	GTACGTACTTAAGGATATCTTTTTTTTAAAAAAAAGTAGGGTGAGAGATGAAAACAAAGTTTGGGCTTGTGTTGGTTTGCTCCTTCGCAAGGCACTTTATTGCGAATTATGCATGGATTTGGGAAAAAGTATTTGCTATACTTGTTACCAACCATTTAATTCGATGCTCTCTCTTTCTTGTTTTAGATAAAGGAAATTATCTTATTTATTTATTTGAATGCAATAATTAACATTTGTTTCTTTAG	AAUUAAC	AAUUAAC	16	81		NA	NA	NA	No	YES	No	No	No	NA	NA
I	1575485	1575672	188	1	SPAC23H4.18c	SPAC23H4.18c.1:exon:1-SPAC23H4.18c.1:exon:2	int_340	127	78	49	0	0	59	1	2	A	AUUGCUUACCU	13	127	dbr1_1;dbr1_2	106	79	7.04006	6.97069	35.6667	80	6.55279	6.20463	GTTCGTCATTATTTTTATGATCATGTTCTTCATGTGTATCAAATTTGCCATAAAGCAAAGTAAACTGTGAAAATTAATACCCAAAGATATATTTGCTATTTTAAAATAAGCATACACTTAAGTACTAGTTTACTCTCTTTGCTTTTTTTATGAGTTCTTCTGATTCATATTGCTTACCTTCAATTTAG	UUCUGAU	UGCUUAC	13	127		NA	NA	NA	No	No	No	No	No	NA	NA
II	1825102	1825283	182	1	SPBC9B6.07	SPBC9B6.07.1:exon:3-SPBC9B6.07.1:exon:4	int_2750	5	4	1	0	0	5	1	2	A	ACUACUAACUG	11	5	dbr1_1;dbr1_2	21	11	5.41458	5.55182	7.33333	12	5.98192	6.00413	GTAAGTTGTTTTCGTTCCCGCGTGTGGGAATTTGTTTATTATATAGATTGCTTTTGCGTTGGAGACTTTTAGAAAAGTTTTGCAACGCTTTTACTTCCTGCTTACATCAAACTTGTTGAATAGCTATTTCTTAATTTTTATCATTTTTCTGTTTATTTGGACAGACTACTAACTGCTTTTAG	UACUAAC	UACUAAC	11	5		NA	NA	NA	No	YES	No	No	No	NA	NA
II	3412393	3412464	72	-1	SPBC4B4.01c	SPBC4B4.01c.1:exon:3-SPBC4B4.01c.1:exon:2	int_4123	16	10	6	0	0	12	1	2	A	AUUGCUGACAC	12	16	dbr1_1;dbr1_2	65	46	2.66499	3.95681	66	15.6667	4.67586	4.46955	GTACGGTAACAGTTGGACGGAGGAGAGTTTTTCCAATACTTGCAAGCGTTGACATTGCTGACACTTTTCTAG	UGCUGAC	UGCUGAC	12	16		NA	NA	NA	No	YES	No	No	No	NA	NA
II	2149157	2149531	375	1	SPBC1711.08	SPBC1711.08.1:exon:1-SPBC1711.08.1:exon:2	int_2810	132	58	74	0	0	52	2	2	A;A	UUCGCUAACUC;AUUCGCUAACU	12;13	123;9	dbr1_1;dbr1_2	213	206	11.8969	11.5352	12.5882	29.5714	7.0772	7.16687	GTATGTACAGTAGTGTTGGGATAAAAAAATTTCCAAACTTAAGTCATGTAACTATGTTTTTATTCATTTCCATCGTATTATCCCTTATTCAATTTCAATGACATTTTTGATTGGGTTGAACACAATAATATTCTATTGAATGAATTCGTATAAACGAGCGAAATTGGGTTTCACCATTTTACATTGTTGCTAGCCAAATCATGATGTCAAGATTGGGTTGATCCTATTATGAAAGTTTTTTCTTTATTGAGTCGGTAGTTATTCAATGCGTTGGTTTCTGAATATGGAATAGTAGTTCATCGTCAAAGGTTTGGAATATTTACGAAACGATGGATATGTCCAAATAAAACGATTGATTCGCTAACTCAATTTTAG	CGCUAAC	CGCUAAC	12	123		NA	NA	NA	No	YES	No	No	No	NA	NA
II	4009177	4009315	139	-1	SPBC3B9.13c	SPBC3B9.13c.1:exon:2-SPBC3B9.13c.1:exon:1	int_4266	65	32	33	0	0	32	2	2	A;A	AUUAUUAACAG;GAUUAUUAACA	13;14	57;8	dbr1_1;dbr1_2	1958	1662	11.3795	11.6579	75.3462	57.3448	11.7359	11.6729	GTAAGTTAACACATTTATGGAGGTGCACGCGTTGTACACATAGAGTCATCAAAAATGATTACTGAAATCCTACCACATTAAATAATGACGCGTCATCATGTAGATTTTGCCTAAAGGGGATTATTAACAGTATTTCTAG	UAUUAAC	UAUUAAC	13	57		NA	NA	NA	No	YES	No	No	No	NA	NA
II	539705	539914	210	1	SPBC649.04	SPBC649.04.1:exon:2-SPBC649.04.1:exon:3	int_2444	542	330	212	0	0	91	3	2	A;A;A	UUUACUAACGA;CUUUACUAACG;UCUCUUUACUA	14;15;18	501;40;1	dbr1_1;dbr1_2	64	43	11.5835	11.5775	0.730337	0.415094	6.22963	6.02987	GTAAGTATAAAGAATGGGCGCGTAGAAGACGTCGAAATTGCATTGGAACGGTGAAGCACACTCTTAATTTTGAAAGGTGAATGGGGTATTCTTTATTGAATTAGGTCATTACGTCAGTCGATTAAAGTTGCTTTGGCGTTCCTTTCGAATAGTTCCCTGTTGAACTGTGTTTTGCTTTACCTTTTTCTCTTTACTAACGACTGTTTTTAG	UACUAAC	UACUAAC	14	501	UCUUUAC	18	1	NA	No	YES	No	No	No	NA	NA
I	3020011	3020229	219	-1	SPAC31G5.17c	SPAC31G5.17c.1:exon:2-SPAC31G5.17c.1:exon:1	int_1821	1266	751	512	0	3	225	4	3	A;A;A;A	GUGGCUAACCU;GGUGGCUAACC;GCACAAUAUUU;UAGCACAAUAU	11;12;98;100	1167;95;3;1	dbr1_1;dbr1_2;wt_2	214	149	10.4944	10.5492	7.67857	6.25	6.75769	6.59835	GTATGTAATTTTTGGATGTGAAGTATTGTTATCGAGGGAGTCATAGAATGGATTAAAACGAAAAGGAGCTTTTCCAAAGGTTTGATATCTTACAGAGCACATTTGAAATTAATAGCACAATATTTAAAAGTTGATTCAATTTCTGCTCACTCAACTATTGCATCTTTCGATAACTTGCTTGTCATACAGAATAGTTTCAAGGTGGCTAACCTTTAACAG	GGCUAAC	GGCUAAC	11	1167	ACAAUAU	98	3	NA	No	YES	No	No	No	NA	YES
I	4825755	4825917	163	-1	SPAC20G4.06c	SPAC20G4.06c.1:exon:3-SPAC20G4.06c.1:exon:2	int_2234	440	276	164	0	0	53	3	2	A;A;A	UUCACUAAUUU;UUUCACUAAUU;ACCUUUCACUA	16;17;20	431;8;1	dbr1_1;dbr1_2	154	85	7.73584	7.8519	77.5	43	7.99842	7.43283	GTAAGTGACGAAAACGATTTAGATGGAATTTGAGAAAGTCCAATATCCCTTTTTTTAAAAATAAATTTATTTATCTACATTGATATATATTTTATGTTTGTAATGTCTTTCTATGTCGTTTTTATAATTATGTGGAACCTTTCACTAATTTTTTTTTGTTTAG	CACUAAU	CACUAAU	16	431	CUUUCAC	20	1	NA	No	YES	No	No	No	NA	NA
I	3869454	3869547	94	1	SPAC1071.08	SPAC1071.08.1:exon:1-SPAC1071.08.1:exon:2	int_815	936	446	489	0	1	144	2	3	A;A	UUUACUAACCA;CUUUACUAACC	15;16	762;174	dbr1_1;dbr1_2;wt_2	340	350	8.12696	8.5221	48.7143	58.5	10.0487	9.96518	GTATGTGAATTGTTAGAGCTACTTTTTAAACTTAGGCGTATGCCATGTTGTTTCTCATTTTGTGTAATTTGCTTTACTAACCAATCATGTGTAG	UACUAAC	UACUAAC	15	762		NA	NA	NA	No	YES	No	No	No	NA	NA
III	1635300	1635811	512	1	SPCC663.03	SPCC663.03.1:five_prime_UTR:1-SPCC663.03.1:exon:1	int_4708	68	30	38	0	0	42	2	2	A;A	ACUUCUAACCC;GACUUCUAACC	13;14	61;7	dbr1_1;dbr1_2	1	2	8.70556	8.80301	0.153846	0.428571	2.57732	1.90085	GTAAGTGTTGTGTGTGTGGATGGATTGAACAAGGAACGATGATGCGAATTGGCAAAATGGTAACATGGCAATATTATTATTGTCTCAGCTCTAATAGTCTGTCTTTACAAGTTGGATGAGAAGGAGAACGATTGAGATGCTGCTTGGCTTTTATGATTATAATGATTATTGTGATAGTTCATGGATGGGTAGGAATATTTTTTTCTTTGTTATTTTTAAGACACATATGCATCTGCAAGCATTCGAGTGAAATAATTTGTTGGCTGATTTTATCCTCACAAGGTTCAACGCTAAATTTTGTTGTACTGGATGCTATAGGCGTTGAAAGTTTCTTGCTTCAATGCTTTTTTTCACTGACCAGATTTTTCCAATTATTAAATAAAAATTTTAACTGGTACA…	UUCUAAC	UUCUAAC	13	61		NA	NA	NA	No	YES	No	No	No	NA	NA
II	2811257	2811568	312	-1	SPBC32F12.12c	SPBC32F12.12c.1:exon:3-SPBC32F12.12c.1:exon:2	int_3959	40	20	20	0	0	28	3	2	A;A;A	UCUGCUAACCU;AUCUGCUAACC;ACAUUUAACAU	15;16;37	33;6;1	dbr1_1;dbr1_2	50	28	7.50371	7.42492	6.375	2.9	5.77141	5.22673	GTATGTAAAGAATTTCAATCGCGTAATTTGGTTATTCTTTTTAATGTTTGTGATATTCTCTTCTTCTTGTATTGATTGCTTTGTACTTTCTGATAGCTGTGAAGAGAGTTTATGAGCATAAAGAGTTAAGGTGTAGCAAGTGAGTGTTCAAAAGTATTTTTGGTTTGATGAGAATGTATATGTCCCTCAATTTTTTTATTTTGCAGACAATCAAGTTTATTGAATCAGATTACTTCTCATTTCACTGCACACAAATTATGGTCCATTGACATTTAACATTAAAAGGCAGATCTGCTAACCTACTACCTTCAG	UGCUAAC	UGCUAAC	15	33	AUUUAAC	37	1	NA	No	YES	No	No	No	NA	NA
II	4221907	4222176	270	-1	SPBC16G5.05c	SPBC16G5.05c.1:five_prime_UTR:2-SPBC16G5.05c.1:exon:2	int_4301	411	257	154	0	0	92	2	2	A;A	UUGGCUAACAU;CUUGGCUAACA	13;14	370;41	dbr1_1;dbr1_2	169	98	7.89486	7.46546	11.3333	14.1429	6.79052	6.27216	GTTTGTAATTTATTTACTCTGGAGCGAACCACCTATCTATCTGTTCACATTTATTTTTTTGTAGTCTTTTTTATGTCTTTCAAATGTTTTTATATTTAGATAAGATATAAATACATTTTGGACTTTTAAAAGTTGTGATATTATATTTTATTCTTTTAAAGTTTGTTGTTTTTCGCTCTTCTTTTTTTGGAATAAACTACTATCATCTTTTTTTTTTATCTTTACGTGCCTCTAGTGTTTTTCTATTATCTTGGCTAACATATATTCTAG	GGCUAAC	GGCUAAC	13	370		NA	NA	NA	No	YES	No	No	No	NA	NA
I	4267234	4267320	87	1	SPAC2C4.05	SPAC2C4.05.1:exon:1-SPAC2C4.05.1:exon:2	int_863	473	173	299	1	0	61	2	3	A;A	UAUACUAAUCU;AUAUACUAAUC	18;19	446;27	dbr1_1;dbr1_2;wt_1	68	53	4.142	4.86821	13.8	54	5.23716	4.91653	GTATGTTAAAATAATCACATTCTAACGATATATATTAATGATAAATGTCTCTGATTCGTATATATACTAATCTTTTTCCCTATTTAG	UACUAAU	UACUAAU	18	446		NA	NA	NA	No	YES	No	No	No	NA	NA
II	1445388	1445473	86	1	SPBP22H7.06	SPBP22H7.06.1:exon:4-SPBP22H7.06.1:exon:5	int_2664	720	336	382	1	1	133	2	4	A;A	AAGGCUAACUC;UAAGGCUAACU	17;18	624;96	dbr1_1;dbr1_2;wt_1;wt_2	55	41	4.9265	5.65042	11.2	6	6.08947	5.82009	GTAAGAATTCAACTATCCAGATAAAACATAACACCTGTGTTTAATCGTTGTACCTTTCAGTTAAGGCTAACTCCAAATTGTTCCAG	GGCUAAC	GGCUAAC	17	624		NA	NA	NA	No	YES	No	No	No	NA	NA
II	4331556	4331640	85	-1	SPBC16C6.02c	SPBC16C6.02c.1:exon:4-SPBC16C6.02c.1:exon:3	int_4331	402	220	177	4	1	102	3	4	A;A;A	GUUACUAACCA;AGUUACUAACC;ACUAACCAUAU	13;14;10	348;53;1	dbr1_1;dbr1_2;wt_1;wt_2	11	3	6.71429	6.70085	12	4	4.37549	2.79283	GTAGGGATCAAATATGAATATAGAATAAAACAGCACTTAGGACAATATAACGTTGTTTTAGAGCAGTTACTAACCATATTTATAG	UACUAAC	UACUAAC	13	348	UAACCAU	10	1	NA	YES	YES	No	No	No	NA	NA
II	3118036	3118218	183	1	SPBC4C3.10c	SPBC4C3.10c.1:exon:3-SPBC4C3.10c.1:exon:4	int_3046	47	27	20	0	0	32	2	2	A;A	UUAUCUAACGA;AUUAUCUAACG	12;13	42;5	dbr1_1;dbr1_2	42	48	8.99293	9.10579	7.16667	3.76923	5.89763	6.21935	GTAAGTTACCCTTGAATGAACCGAATGACTGTAAATTAAGGCTGCTTTAGCTGGTTTATCCTTTAGAATAAACTATCGACTTACTCTCAAGTCCTTATGTTTACTAGATGATTACTAAAGCCTTTTTGCATGTTTTATTTTTCATTTTATTGTTGTTAAAAAAATTATCTAACGATTATGAAG	AUCUAAC	AUCUAAC	12	42		NA	NA	NA	No	YES	No	No	No	NA	NA
I	879836	879986	151	-1	SPAC23G3.07c	SPAC23G3.07c.1:exon:2-SPAC23G3.07c.1:exon:1	int_1313	43	26	17	0	0	22	2	2	A;A	GUUACUAAUUC;UGUUACUAAUU	13;14	42;1	dbr1_1;dbr1_2	31	19	7.09998	7.23947	10.6667	10	4.18872	3.99745	GTAAGTGATTGAAATGTTTTGCTTACGTGCACACTTAGCTGCGGAAGGATATTCATTGTGTGTATCCATTTTCGGCTCCTCAAATTGCGCTTCGCACTGTCTCTCTTTTATTACATTATATTTTTTTCGTTGTTACTAATTCATTTACTAG	UACUAAU	UACUAAU	13	42		NA	NA	NA	No	YES	No	No	No	NA	NA
I	3496989	3497276	288	-1	SPAC328.10c	SPAC328.10c.1:exon:2-SPAC328.10c.1:exon:1	int_1930	751	438	313	0	0	168	9	2	A;A;A;A;A;A;A;A;A	AUUUCUAACUU;AAUUUCUAACU;UUAUUUCAGAA;ACUUUUCAUGU;GUGGAAAAAGC;UUGACCUAAAC;AAAGGGAACUG;AAAUUCAAUUG;ACUUUCCAGAU	11;12;21;31;75;98;173;202;241	678;66;1;1;1;1;1;1;1	dbr1_1;dbr1_2	187	179	11.9246	11.706	1.03297	1.09091	8.22499	8.13249	GTATGTATAAGGTGGGATTGTGTTTTCTAGCTGCTAGTAAACTTTCCAGATTTTGTGCTTGGAATTGTCTGAAATATACAAATTCAATTGTAGTTACTTGGTTTCATGAAAGGGAACTGCTGACAATACGTTACTTGGATATGCTGTTGTAATTTTTTTTTTCAGTCAATTCACTAGTTTTACTTGACCTAAACCTTGGAGCAAATGTGGAAAAAGCAGCTGGAAATTACAAAAGTTTTCATTTACACCAACTTTTCATGTTATTTCAGAATTTCTAACTTTATTTAG	UUCUAAC	UUCUAAC	11	678	AUUUCAG	21	1	NA	No	YES	No	No	No	NA	YES
I	5353426	5353556	131	-1	SPAC4D7.02c	SPAC4D7.02c.1:exon:2-SPAC4D7.02c.1:exon:1	int_2339	67	48	19	0	0	42	3	2	A;A;A	AUGUUUAACUU;UUAACUUAUGU;UAUGUUUACAG	14;10;4	52;14;1	dbr1_1;dbr1_2	2	3	6.61352	6.79878	1	2	2.92379	3.45007	GTATGTTTTATGAATGTATTAGTTGCATACTGCTTTTATTATTAGTAGACTTAGTTTCATATCTGCAACTTTGTACCCTTAATTGTCAAAATCCTTCTCCAATTTAGCAAATGTTTAACTTATGTTTACAG	GUUUAAC	GUUUAAC	14	52	AACUUAU	10	14	NA	YES	YES	No	No	No	NA	NA
II	231565	231736	172	1	SPBC660.16	SPBC660.16.1:exon:4-SPBC660.16.1:exon:5	int_2391	355	202	134	8	11	96	2	4	A;A	UUGGCUAACGG;UUUGGCUAACG	18;19	316;39	dbr1_1;dbr1_2;wt_1;wt_2	89	91	6.96045	6.90637	30	46	6.50719	6.74976	GTAATGATATTGATTGATATATTGAAGGGAAATATCGTATGCTATCCTGACAATTTGTATTGCCTTTTGCAGTACATTCTTGTTGCGGAAAGTTCAATACTATTTTTTTCTTCATGGTTATCTTTCTTTCTTTTGAAATCTTTTTATTTGGCTAACGGTTCTTTTTCTTCAG	GGCUAAC	GGCUAAC	18	316		NA	NA	NA	No	YES	No	No	No	NA	NA
II	3246875	3247124	250	1	SPBC25H2.16c	SPBC25H2.16c.1:exon:3-SPBC25H2.16c.1:exon:4	int_3089	51	32	19	0	0	38	2	2	A;A	UGUGCUAACAU;UUGUGCUAACA	11;12	39;12	dbr1_1;dbr1_2	28	17	7.34781	7.10026	3.22222	3.6	4.74227	4.81169	GTATGTTCTGTTTTAATTTTTCACAACTTTGTTTTTCACTTAGAAGTTACTTCGCATTATTTGATATGGTACTGCTTTTATAACTTGTTTATTTTCTGAACGAAACAATCTTAAGTGCTGAACCTTCAGAATTCCAATCTGGTTATTGTGATTTGTATAAAATAGATTTTTGTTAAATTTATTATAAATTTTGCTGAGCCCTTTTTTTTTCACGTTTTTTTCAAATGCCTTTTGTGCTAACATTTTCTAG	UGCUAAC	UGCUAAC	11	39		NA	NA	NA	No	YES	No	No	No	NA	NA
III	1861259	1861382	124	-1	SPCC1223.10c	SPCC1223.10c.1:exon:4-SPCC1223.10c.1:exon:3	int_5235	20	12	8	0	0	14	2	2	A;A	GAUACUAACAU;CGAUACUAACA	14;15	19;1	dbr1_1;dbr1_2	14	14	4.20265	4.49446	7.5	5	3.06704	3.02005	GTAAGTTATTGTCCCATATACTATTTTTAAAGAGGTTAAAATCTATGTATGCATGCGTGCATGTGTATGTATAGAACAGGAATCGTTTTCATGTCACTACTACGATACTAACATTAGGCATTAG	UACUAAC	UACUAAC	14	19		NA	NA	NA	No	YES	No	No	No	NA	NA
II	4275763	4275914	152	1	SPBC16A3.12c	SPBC16A3.12c.1:exon:2-SPBC16A3.12c.1:exon:3	int_3330	121	67	54	0	0	45	3	2	A;A;A	UUGACUAACAA;GUUGACUAACA;AAUGUUUACAU	13;14;50	119;1;1	dbr1_1;dbr1_2	55	46	7.97931	8.01742	18.6667	5.875	5.9985	5.8159	GTAAGTTATTTGCTTGCCAGATCAAGACTCTATCCCGAGCTATTGTTGAAGACGCGTAAAGAAAAGCTATTGATTTAACAAATATGAGAAGGGCAAATGTTTACATTAGATTTTCGTAGGATATATTTGGCGTTGACTAACAATACATTTAG	GACUAAC	GACUAAC	13	119	UGUUUAC	50	1	NA	No	YES	No	No	No	NA	NA
II	3522920	3523001	82	1	SPBC1105.09	SPBC1105.09.1:exon:1-SPBC1105.09.1:exon:2	int_3186	274	149	125	0	0	48	2	2	A;A	CAUACUGAUAG;CUGAUAGAUAU	10;6	273;1	dbr1_1;dbr1_2	25	15	7.03474	6.97508	26	5.33333	4.04428	3.77421	GTAAGCGCACGAAATCTTCATATCCAAATATTCATGATTGTACATAGTATCTTAATTCTTGAACACATACTGATAGATATAG	UACUGAU	UACUGAU	10	273	GAUAGAU	6	1	NA	YES	YES	No	No	No	NA	NA
I	1139334	1139447	114	1	SPAC56F8.08	SPAC56F8.08.1:exon:1-SPAC56F8.08.1:exon:2	int_259	11	6	5	0	0	10	2	2	A;A	AUUUACUAACA;UUUACUAACAU	13;12	6;5	dbr1_1;dbr1_2	42	22	5.56496	5.88969	21.5	5.75	6.16249	5.78278	GTACGTTTAATTTCGCATAATAGCGCCCGTATAAACTGCTGAGTCCAATAATTTAGTTTTAATGGACACAATAAATAAAGGGCTTTCGAAGGTGATTTACTAACATTTTTGTAG	UACUAAC	UACUAAC	12	5		NA	NA	NA	No	YES	No	No	No	NA	NA
II	1500987	1501087	101	1	SPBC11B10.09	SPBC11B10.09.1:exon:3-SPBC11B10.09.1:exon:4	int_2680	315	206	109	0	0	100	2	2	A;A	GUCGCUAACCG;UGUCGCUAACC	9;10	262;53	dbr1_1;dbr1_2	34	32	6.9071	7.16391	5.83333	16.5	5.29161	5.19523	GTATATTTTTTTTCTTACTTGGCTGTATGACTTTATTCCCAAAAAATTTGGAATATTGACTGACGGTCTTTCAGCATTAATTTGTGTCGCTAACCGTTTAG	CGCUAAC	CGCUAAC	9	262		NA	NA	NA	No	YES	No	No	No	NA	NA
III	1761249	1761634	386	1	SPCC1450.15	SPCC1450.15.1:exon:1-SPCC1450.15.1:exon:2	int_4718	87	43	44	0	0	48	2	2	A;A	UGGACUAACAG;AUGGACUAACA	10;11	85;2	dbr1_1;dbr1_2	15	18	7.84237	7.93049	3.2	2.11111	3.91209	4.0664	GTATGTTTTATTTTACAGATGGGCGAGGTGTCCAGGTTGGAGATGTACGGAACGGATATGAGTAACCAGGGTTGCCTTTAAAGATTTATAAAAACAATATTTACATTGCTTCATCTCACATCCATGAAGATGTATTTGCAAATTTTTTTTTTTTAAATTTTTGTTCTGTAATTCTTTTTTTTGTTTATTGATGTGTTTTGTAATTGTTGGGCGTTGAATTATTTACTTTTCCTCGAACAATCAATTAAGGTAGTTGGGATAGAAGCAATGACTTGTACGTTTATCAAAAATACTTTGCAATCTAATTTTGGATATTTCTTAACATCTTGTCACTCTGTAACTCGTTTATCTCTTTTGAAGTGTTGGAAATGGACTAACAGTACAAG	GACUAAC	GACUAAC	10	85		NA	NA	NA	No	YES	No	No	No	NA	NA
II	715610	715980	371	1	SPBC119.02	SPBC119.02.1:exon:2-SPBC119.02.1:exon:3	int_2468	294	180	113	1	0	102	3	3	A;A;A	AUAACUAACAG;GAUAACUAACA;UAAUGAUAACU	15;16;20	236;57;1	dbr1_1;dbr1_2;wt_1	4012	3577	11.9297	11.6435	78.6863	63.8929	11.2833	11.3752	GTATGTAACTATTTAGTCTTGTGTAGATTATGTAAATACGCATTGTAAGCTTGTGAATCGGAGGAGGAAGTTTGTTATATACAATATGAATTGAAGAGTTGATTGCATCTTGTTTTTCTGGAAAAATCGGTATGGTTGACAGTGATGCAAAATTTTTTAAGTGTTATGGTGAAAGAGTATACGCAGAAGTTTTTTTATAATTGTTTACTCTTACCTTTTATCTTCATTTCTTTATGTTTTACCAGCGGAACTTTATCGATTTTTATACGATTGCGTCCATCCAAGTGAAGCGAGGGCAATTACATTGCGTAGCATTACGAATCTGATTGATAGTCTTTTTTTTTTAATGATAACTAACAGCATATTCGTAG	AACUAAC	AACUAAC	15	236	AUGAUAA	20	1	NA	No	YES	No	No	No	NA	NA
I	2396616	2396700	85	-1	SPAC22H10.12c	SPAC22H10.12c.1:exon:2-SPAC22H10.12c.1:exon:1	int_1686	234	113	121	0	0	47	2	2	A;A	GUUACUAACUC;AGUUACUAACU	11;12	209;25	dbr1_1;dbr1_2	143	115	4.89683	5.50584	28.8	58	7.35422	7.312	GTAAGTTAGATGTGGTTAATATTTCACATAACCGTTGTTAATACCTGGATATGGACATTCTCAGTCAGTTACTAACTCCTCTTAG	UACUAAC	UACUAAC	11	209		NA	NA	NA	No	YES	No	No	No	NA	NA
II	3818374	3818529	156	1	SPBC21C3.13	SPBC21C3.13.1:exon:1-SPBC21C3.13.1:exon:2	int_3258	213	116	97	0	0	48	3	2	A;A;A	CUUACUAAUAC;ACUUACUAAUA;UUAACUUACUA	13;14;17	200;10;3	dbr1_1;dbr1_2	2889	2318	10.4942	10.8862	578	463.8	10.3723	10.2345	GTATGTCTATCCTATTTAAAAAAATTAGTTTTGTCGGTGGATATAATACGATATTCGATATACCCATTTGGTTGTTCTCGATGATCGAAAGGGTCGTAGATTATACACCTGAAAACTAACATCTATTATTTGTTAACTTACTAATACAATCTTTAG	UACUAAU	UACUAAU	13	200	AACUUAC	17	3	NA	No	YES	No	No	No	NA	NA
III	1811561	1812012	452	-1	SPCC285.09c	SPCC285.09c.1:exon:4-SPCC285.09c.1:exon:3	int_5225	82	41	40	1	0	36	2	3	A;A	GAGACUAACCU;UGAGACUAACC	12;13	73;9	dbr1_1;dbr1_2;wt_1	1	0	7.92763	7.77933	0.5	0.25	6.26857	5.77323	GTAAGTAAATTCTTTCTCAATAGCTTCTGTCAAATGAAAATTTTTTCATTGTTTTAGTGAATAGGTTGAGGGTTGGGAAGGCAATGTTGAGTTTTGAAAATTTTTTATTTTCTTCATCTTAGTTGAAGAGATGTATGCTCGTCTTTTTTTCCTTCAAATCTATTTGCTGAACACACATTTATATATTTTGCATATATGTAAACTATCTGCTGACGCTTTGGTTGATTTGCATGGTTTCATGGTACTTGTGCAATTTTTTTTGTGAGACAGTGATATTATTTGAAAGATTGCAAAGATTGCAATAATAATTATATCTCTTTTTCTTTCACTGTTCTAATATCTTTTGTTCTTGTTCAAACAAGTTAATGAATTTAACTCTTATGCGAATTTGCTAAATCA…	GACUAAC	GACUAAC	12	73		NA	NA	NA	No	YES	No	No	No	NA	NA
II	4342922	4343116	195	-1	SPBC16C6.07c	SPBC16C6.07c.1:exon:3-SPBC16C6.07c.1:exon:2	int_4336	614	333	279	2	0	120	2	3	A;A	AUUGCUAACUA;UAUUGCUAACU	11;12	547;67	dbr1_1;dbr1_2;wt_1	274	169	9.0645	9.29718	91.6667	170	7.54159	7.2665	GTATGTTTTATGTCGAGAAAGCAGTTGCACGATGTTGTCTGATGAATGGCGTTCCTGTAGTTCATATAGCTGATATGAACTACAAGATATGACATTCATGAACAGGATGTATTTTTACAATTTTTTATCATGTAAAATGCTCTCATTTTATATGAAATTTGCTTAACCCGTTGTTCTATTGCTAACTAGCCCTAG	UGCUAAC	UGCUAAC	11	547		NA	NA	NA	No	YES	No	No	No	NA	NA
II	1238601	1238820	220	-1	SPBC651.01c	SPBC651.01c.1:exon:4-SPBC651.01c.1:exon:3	int_3629	356	192	163	0	1	73	3	3	A;A;A	UUCACUAACAA;GUUCACUAACA;AUGGUUCACUA	12;13;16	336;17;3	dbr1_1;dbr1_2;wt_2	189	128	11.0254	10.9899	21.1111	18.4286	6.49096	6.22189	GTAAGTATTTGCCAAAGAAATGGATGCCTGCAGTCACTGTTAAAGAATGAGAAATGATGCTTTAACGTGTTTGGTGTGAATTCTTATGTGCACAGTATTCTTAACACTGTGTTACTCCTATTGATTTTTTAAGTGTTTAATTGTGTTGGAATTCTCAGCAGCATCGTGAATCTTTCCTTATTTCCATATCACTATCTATGGTTCACTAACAATTTCTTAG	CACUAAC	CACUAAC	12	336	GGUUCAC	16	3	NA	No	YES	No	No	No	NA	NA
III	2157046	2157129	84	-1	SPCC1620.07c	SPCC1620.07c.1:exon:3-SPCC1620.07c.1:exon:2	int_5301	62	28	34	0	0	22	3	2	A;A;A	CUCACUAAUUU;ACUCACUAAUU;UUCACUCACUA	16;17;20	54;5;3	dbr1_1;dbr1_2	2	5	3.62702	3.79854	1	3	1.7549	2.18422	GTATGCATTGACATCTGCCGTACATTATAGTTAGGCATTGTACTGCTTTGGCATGAATTCACTCACTAATTTTTGTTTGTTTAG	CACUAAU	CACUAAU	16	54	CACUCAC	20	3	NA	No	YES	No	No	No	NA	NA
III	665069	665213	145	1	SPCC16C4.03	SPCC16C4.03.1:exon:1-SPCC16C4.03.1:exon:2	int_4512	149	86	63	0	0	68	2	2	A;A	UUUACUAACAC;UUUUACUAACA	13;14	120;29	dbr1_1;dbr1_2	66	57	8.35545	8.24061	2.57692	3.625	5.95088	5.88635	GTATGTATTTTGATATACTGTAATTAAATACGAGTCGCAAGACCGACAGTATATGGTGGTGCCACACTTGGTGATAAGCTCTTGTTGGTTTGCCAAGTGTAGTCTGATTTTCAACTGGAACGATTTTTACTAACACTATGTGTAG	UACUAAC	UACUAAC	13	120		NA	NA	NA	No	YES	No	No	No	NA	NA
I	2746336	2746438	103	-1	SPAC6F6.07c	SPAC6F6.07c.1:exon:2-SPAC6F6.07c.1:exon:1	int_1762	890	556	333	1	0	119	2	3	A;A	AAUUCUAACUU;CAAUUCUAACU	11;12	842;48	dbr1_1;dbr1_2;wt_1	3010	2542	11.135	10.868	231.615	423.833	11.4166	11.4509	GTATGTTAAATTTATTCTCTGATTGTAAAAAGGAGCTATAAAATTTTAAGCTATAAAAATTTTTACACCCACATGACAAAAACTCAATTCTAACTTTGAATAG	UUCUAAC	UUCUAAC	11	842		NA	NA	NA	No	YES	No	No	No	NA	NA
III	2366867	2366958	92	-1	SPCC70.07c	SPCC70.07c.1:five_prime_UTR:2-SPCC70.07c.1:exon:3	int_5340	49	25	24	0	0	27	2	2	A;A	GUUACUAACAU;AGUUACUAACA	11;12	45;4	dbr1_1;dbr1_2	7	7	5.93939	6.45662	1.14286	1.6	1.52305	1.81486	GTATATTATCTCCTCTTGGATAATTCGTGAATTACAGAAGACTGAGGATATAGACTCTATAGACGATATATGAAGTTACTAACATTAAGTAG	UACUAAC	UACUAAC	11	45		NA	NA	NA	No	YES	No	No	No	NA	NA
II	2874387	2874540	154	1	SPBP4H10.04	SPBP4H10.04.1:exon:2-SPBP4H10.04.1:exon:3	int_2973	48	28	20	0	0	31	1	2	A	CGGUCUGACAG	9	48	dbr1_1;dbr1_2	23	16	6.47502	6.41732	3.42857	4.25	5.73728	5.73536	GTATGTTGATTATCACCTTTCATATTTAGGCCCTAATTACTATAAGGTAAAATATTAGAACTTTGAAATGTAATTTATGACTATGTTTTTCCTTCATTTTAATTTGGGTCGATATTTTGTTTGTATTGCAATATTCTTCGGTCTGACAGCTTAG	GUCUGAC	GUCUGAC	9	48		NA	NA	NA	No	YES	No	No	No	NA	NA
I	3050746	3051374	629	-1	SPAC24C9.06c	SPAC24C9.06c.1:exon:2-SPAC24C9.06c.1:exon:1	int_1829	568	298	269	0	1	126	5	3	A;A;A;A;A	CGUACUAACUA;UCGUACUAACU;CUAACUAAUUU;ACUAACUAAUU;UAGCAAAAGUG	16;17;12;13;453	497;52;16;2;1	dbr1_1;dbr1_2;wt_2	26	15	11.4711	11.6022	0.710526	0.533333	5.83411	5.29585	GTAAGTTGTGTTGTTGGTCTTGGTGGCACGTAGCAAGGTTTTTATGTAGTGGATGAGAGAATTGTTAAGGATGGTGGAAATCTGGATTTGCTTCTCTATGGAACAATTTTTCTCGCGATTACAGACCATGAATCGAGAGTAGAATGACTAAGGGTAAAAACTGGGCACGTAGCAAAAGTGATGGCTTTCCTGTGATTAGTAATCCGTGAAGACGCGAGCAACACGTTGATTAGAGGAAAGCGGTGAATCTTGAAATAGTAGGTGAAGGGCTAATTTAAAAAATGTCCGGCTAATTACGAATAATTAATTAATTAGCTACGAACTATGGAAAACTAGTCAATTGCTAGGAAAATCGCCAGTTTCTAAAAGAGCTAGTTAATTTATGAAAGAGGATGCACA…	AACUAAU	UACUAAC	16	497	AACUAAU	12	16	NA	YES	No	No	No	No	NA	NA
III	200460	200642	183	1	SPCC1235.11	SPCC1235.11.1:exon:3-SPCC1235.11.1:exon:4	int_4406	271	163	108	0	0	68	3	2	A;A;A	UUUGUUAAUCU;UUUUGUUAAUC;UAUCGAGAUGA	10;11;48	233;37;1	dbr1_1;dbr1_2	30	25	9.80193	9.74686	2.38462	1.85714	6.78291	6.54039	GTATGTGTTAAAAAATAGTCATATCAATAACTTGGCCATGACAATGCGGTTTTGGGGAAGCTCTTTTAGAGATTGGAGTTAGTTTCCTTTTTTCCGCTGATCGTGGTTATCTCTGTTGTCAATGCAGTTATCGAGATGACTTTCTGTATCGTTTAAAAGTTGCTTTTTTGTTAATCTCCTTAG	CGCUGAU	UGUUAAU	10	233	UCGAGAU	48	1	NA	No	No	No	No	No	NA	YES
II	1546465	1547319	855	1	SPBC29B5.01	SPBC29B5.01.1:five_prime_UTR:1-SPBC29B5.01.1:exon:1	int_2694	493	322	170	0	1	128	4	3	A;A;A;A	ACAUCUAACUA;GACAUCUAACU;CUAACUAAUUC;AGUAGGAACAU	16;17;12;188	448;29;15;1	dbr1_1;dbr1_2;wt_2	1	1	10.7618	10.672	0.133333	0.2	5.65528	5.32662	GTATGTGTTTATACATGCAATTGTGAAGTTTGATTATGTAAAAGGCTGTAAAATTGGAAGAGCGTGATAAAAACGTGACGGGTTGTGTTGAAAACCGAATTTTTATGAAAATTTGAAAATTTGCTCCTATCGTCATTGACCCTACTAAACATGACGAGTATGACGCTTTCTTATCAATAACACTGATCGTTATGGGGTTGTTAGTTTACAGGAAACGTAAAATGTGTTTGGAATTCCTTCGTTTTTTGAGGGTTTGGAAATTTTTTTTTGGTGTTGTTGTGCTAGAAAATTTTACTTGTTACCATTGTAGGTTACTATTGCCTTGACTGAACTGGGATCTATGTGGTGGCAACTTTTGATGAATGATTTCTCGGAAGTGAATAAACGCACACGGGAAGA…	AACUAAU	AUCUAAC	16	448	AACUAAU	12	15	NA	YES	No	No	No	No	NA	NA
I	2145780	2145926	147	1	SPAC23C11.08	SPAC23C11.08.1:exon:1-SPAC23C11.08.1:exon:2	int_457	244	130	112	0	2	69	3	3	A;A;A	AGUGCUAAUGU;CAGUGCUAAUG;AUGUCUGACUU	16;17;9	209;27;8	dbr1_1;dbr1_2;wt_2	43	32	7.1271	7.32871	7.33333	11	5.95558	6.06031	GTATGCATGATTTGTTGAATTGAGAAAAATCGCATTGTCAGTCTCTTCGATTGATTGATTGCTAGTGACGGAGTAGGTCGCTGTGAGTGCGTTCTTCTCTTTTGTTTTGTAATTTTCATGTTGCAGTGCTAATGTCTGACTTTTTAG	GUCUGAC	UGCUAAU	16	209	GUCUGAC	9	8	NA	YES	No	No	No	No	NA	NA
II	1695809	1695923	115	1	SPBC19C2.10	SPBC19C2.10.1:exon:1-SPBC19C2.10.1:exon:2	int_2716	89	30	59	0	0	44	4	2	A;A;A;A	UUUGUUAACUA;UUAACUAAUUU;UUUUGUUAACU;AUGACUCAAUA	12;8;13;25	68;11;8;2	dbr1_1;dbr1_2	12	12	5.25792	5.74067	3.25	13	4.94845	4.77098	GTAAGTATTATCGTCCTAATGACATTCGTTACCAATTTGATGCCATAATTAAACGATTATTAGGCCTGCCTAACTTATCTTATATGACTCAATATTTTTGTTAACTAATTTTTAG	AACUAAU	UGUUAAC	12	68	AACUAAU	8	11	NA	YES	No	No	No	No	NA	NA
I	367190	367292	103	1	SPAC630.11	SPAC630.11.1:exon:4-SPAC630.11.1:exon:5	int_38	127	76	51	0	0	59	2	2	A;A	UCUACUAACGU;CUCUACUAACG	13;14	109;18	dbr1_1;dbr1_2	11	13	4.61972	4.81369	3	4.66667	4.35841	4.54331	GTATGGAAATATAATAATGTTGGTTGTTCTGGGGAAATTATTTCAACCATAATTGTTATTTTTCATTATTATTTGTAAGGAGCTCTACTAACGTTTACTAAAG	UACUAAC	UACUAAC	13	109		NA	NA	NA	No	YES	No	No	No	NA	NA
II	1224740	1224952	213	1	SPBC725.10	SPBC725.10.1:five_prime_UTR:2-SPBC725.10.1:exon:1	int_2586	9	8	1	0	0	8	1	2	A	UUCGCUAAUCA	8	9	dbr1_1;dbr1_2	5	5	7.56559	7.29014	1.2	2	2.48796	2.77978	GTATGTCAGTTTTAATTATCAAACTTAACTCTAGCTACTCCATGTCTATTTGCTTAGCATGGTTTGAAAGACCTTTTGTATCTCGACATTATCTCTGCTGTTTGTAAACGAGCTGCATTAAGATTCGAAATACTTATGGTTTTTTAGTAGCAGTCGTTGTTAGTACTCTTTACATTCGTGGAATTTTTTTTTCCCGATTTCGCTAATCAACAG	CGCUAAU	CGCUAAU	8	9		NA	NA	NA	No	YES	No	No	No	NA	NA
I	2439658	2439854	197	1	SPAC6B12.15	SPAC6B12.15.1:exon:1-SPAC6B12.15.1:exon:2	int_527	293	154	138	1	0	98	3	3	A;A;A	UUUUCUAACAU;GUUUUCUAACA;CGGUAGAAAAA	13;14;105	248;44;1	dbr1_1;dbr1_2;wt_1	1909	1215	11.1648	11.2001	173.636	101.333	10.6889	10.5158	GTATGTAAATCAAAAAAATTTCAGTGCGGTAATTGTTAGCAATCTAATAATGAAGTTGTGCAATATGTAAATTATACAGTGATAGCGGTAGAAAAACCAGACCTGAAAATTTTACCTAATTAGCACATCAGATAAAAATATTGAGCGCTTTCGATTGCTTTCTTGCTTTAGTACTAGTTTTCTAACATCTATTTCAG	UUCUAAC	UUCUAAC	13	248	GUAGAAA	105	1	NA	No	YES	No	No	No	NA	YES
III	1607234	1607395	162	-1	SPCC777.06c	SPCC777.06c.1:exon:2-SPCC777.06c.1:exon:1	int_5174	226	142	83	0	1	82	3	3	A;A;A	UUUACUAACCG;GUUUACUAACC;GAAGUUUACUA	19;20;23	168;57;1	dbr1_1;dbr1_2;wt_2	471	324	6.8905	6.82729	20.5217	36.1111	7.1821	7.1272	GTAAGAATTTATGATGAACATTGCTAAAGATAATGGTAAATTGTATCGCATAGGTCTTTAATTGTTATGTGATTATCGTGGTATAAACCATTTTTTTTTTACTTTAGACGTTGTTGATTACTTTAGACTGTTGAAGTTTACTAACCGTTTGTTGCATTGTAG	UACUAAC	UACUAAC	19	168	AGUUUAC	23	1	NA	No	YES	No	No	No	NA	NA
II	2681339	2681466	128	-1	SPBC3E7.11c	SPBC3E7.11c.1:exon:3-SPBC3E7.11c.1:exon:2	int_3923	42	22	20	0	0	28	3	2	A;A;A	UGAAAUAACAA;CUGAAAUAACA;GUACUAGAACU	11;12;21	40;1;1	dbr1_1;dbr1_2	13	6	6.84716	7.03799	7	1.75	2.49634	2.06826	GTAAGAATTTATTAAACAAAATTTTGTCTTTTTTACGATTGAGTGAGTTTCTCGTGAAAAAGAGAGCGACTTGCAAATATTTCCTCAACTAGTGTTGGGCGTACTAGAACTGAAATAACAAAGTATAG	AAAUAAC	AAAUAAC	11	40	ACUAGAA	21	1	NA	No	YES	No	No	YES	YES	NA
II	632143	632247	105	-1	SPBC839.17c	SPBC839.17c.1:exon:4-SPBC839.17c.1:exon:3	int_3502	14	8	6	0	0	9	1	2	A	AUUGCUGACAU	17	14	dbr1_1;dbr1_2	25	34	6.82111	6.6673	8.66667	11.6667	4.77141	5.50683	GTATGTGAAATCTACGACGAATTATTCTAGCAAATCAATTTTTATATTGTGTTGTTTTCTCCTTTCCAAAACGAATATTTCATTGCTGACATAACCGTGGGATAG	UGCUGAC	UGCUGAC	17	14		NA	NA	NA	No	YES	No	No	No	NA	NA
II	3385258	3385406	149	-1	SPBC3B8.06	SPBC3B8.06.1:five_prime_UTR:2-SPBC3B8.06.1:exon:1	int_4117	103	68	35	0	0	52	3	2	A;A;A	GUUAUUAACUC;UGUUAUUAACU;UGGCAGAAGUG	11;12;21	94;8;1	dbr1_1;dbr1_2	7	3	7.45552	7.608	4	4	1.88364	1.82753	GTAGGTTAATAGCATCATATTACAAGTTAACACATTTTGATGAGAGAATTTCATGCTATGATACCGGAGCGGATATGTCTGCGCAAAAATCACTCCACTTGATTTGCATATATATCGATGATGGCAGAAGTGTTATTAACTCTTTTTAG	UAUUAAC	UAUUAAC	11	94	GCAGAAG	21	1	NA	No	YES	No	No	No	NA	YES
II	850709	850798	90	-1	SPBC36.05c	SPBC36.05c.1:exon:7-SPBC36.05c.1:exon:6	int_3535	1122	674	446	1	1	179	3	4	A;A;A	UUAACUAACAU;UUUAACUAACA;AACUAACAUUG	12;13;10	787;330;5	dbr1_1;dbr1_2;wt_1;wt_2	39	22	8.03084	7.77536	40	23	5.33817	5.34537	GTAAGATAAAAGTTTTTCCCAAAAAAGGGGCTTTGAAGCATCCGCTGAATTTGTGAATGGAGTATAGGACTTTAACTAACATTGGTTTAG	AACUAAC	AACUAAC	12	787	CUAACAU	10	5	NA	YES	YES	No	No	No	NA	NA
II	888143	888512	370	-1	SPBC713.11c	SPBC713.11c.1:exon:2-SPBC713.11c.1:exon:1	int_3550	530	301	228	1	0	66	2	3	A;A	AAUGCUAAUAU;CAAUGCUAAUA	13;14	513;17	dbr1_1;dbr1_2;wt_1	414	254	10.8697	10.5092	25.9375	51	7.12423	6.80623	GTATGTTTTTCCAGCTCATATATGGAGAAGGTGCAGGATCCTACTGAACTTGGCTTTCATTTTTGATTTGAGTTGATTCGATTTAACTTCTCTTGTTGTTTTGTTTCAACATCTCATGACTTTTTGACTCTGAGCGACTCGTTAATGTTTGAAATGACATGCTTTTAATTGTCGCCTGTCCTGTGTTTATGCTTGCGCTTGTTTTGAATCGCTCACATCGCATTGTTGTTACTAAATCAAATTGATTTCGCCAAGTGTCTTGGTTTCTACTTTCTCTTTTATAGCTACATTTTACTACGAAATTTTTTTTTTTGGTATTATAAAAAAAAAATTTCGCTTCTTTTTGACTCAATGCTAATATATGACACAG	UGCUAAU	UGCUAAU	13	513		NA	NA	NA	No	YES	No	No	No	NA	NA
II	1760849	1761183	335	1	SPBC11G11.03	SPBC11G11.03.1:exon:1-SPBC11G11.03.1:exon:2	int_2732	344	209	135	0	0	93	2	2	A;A	UUUACUAACUG;UUUUACUAACU	18;19	306;38	dbr1_1;dbr1_2	139	75	9.13276	9.20298	10	4.47059	6.85629	6.83961	GTAAGTGAAAATGGGCTCGGTTGAGGAGTTGTAACAGAAATATCGTGCTGAAGGATTACAAAATGAGAAAAACGAGCATCATGGATTTAGATGCTTATTTTTAGTGATTGAATTGTCTATTTTTGTACGAAGGTGTTTCCAAATGCTTTGAAGTTGAAATTCAACAGTACAGCTTTTTAGATTATGAGTTCTCGTTGAGGTTTTAAAGTTATACTTTTTTTTCCAATTATCTACTTATTTATTAGCACTGCTAACAAATACCCATCTGTTTACACCTTCTACTCGATCGTATAAAATTTTAAATGGCTGTTTTACTAACTGTTTATTTTCAATAG	UACUAAC	UACUAAC	18	306		NA	NA	NA	No	YES	No	No	No	NA	NA
I	2315600	2315700	101	1	SPAC13G7.11	SPAC13G7.11.1:exon:2-SPAC13G7.11.1:exon:3	int_496	32	21	11	0	0	21	2	2	A;A	UUUGCUAACUU;UUUUGCUAACU	16;17	28;4	dbr1_1;dbr1_2	4	3	4.30224	4.36664	0.833333	0.5	4.56476	4.58404	GTACGTATTTCTGTAACGTTAATATTGGTTTGCTTTTTTTAGAATTTCCGTTAGCCATTAAACTTATCACATTTCAGTTTTGCTAACTTAGCGTTGTTAAG	UGCUAAC	UGCUAAC	16	28		NA	NA	NA	No	YES	No	No	No	NA	NA
III	1266544	1266670	127	-1	SPCC23B6.01c	SPCC23B6.01c.1:exon:3-SPCC23B6.01c.1:exon:2	int_5134	663	434	228	0	1	132	3	3	A;A;A	GAUCUUAACGA;UGAUCUUAACG;AUGAUUGAUCU	16;17;22	610;52;1	dbr1_1;dbr1_2;wt_2	45	34	10.8264	10.6716	2.875	2.05882	5.86734	5.75476	GTAGGTACAGATAGAAAAGGCCTTTTTGAGTTGGTGACAAACACTACAATGGCTAATGGAGATGCGACAACTTTGATATGAAGTTTAATTTTGTTGGAATGATTGATCTTAACGAATTTTTATTTAG	GGCUAAU	UCUUAAC	16	610	GAUUGAU	22	1	NA	No	No	No	No	No	NA	NA
II	2720591	2720757	167	-1	SPBC4F6.16c	SPBC4F6.16c.1:exon:1-SPBC4F6.16c.1:three_prime_UTR:1	int_3935	65	33	32	0	0	40	2	2	A;A	UUUACUAACAU;AUUUACUAACA	9;10	59;6	dbr1_1;dbr1_2	5	0	8.47459	8.55622	0.461538	0.1	6.74083	6.68798	GTATGTCAAAAAACGGTTTTTGGAAGCTATGATGACCAAAATTGGTCCGTGTTACTGAGCGGGATTAAGACCCCAGCAAACGAAGAGAAACCCAATTTTTAATTCTGATTTTTTCCTCAAAAATTTTTTTGCTTCAAATTTTGTTCCTTAATTTACTAACATCTTAG	UACUAAC	UACUAAC	9	59		NA	NA	NA	No	YES	No	No	No	NA	NA
I	4227001	4227316	316	1	SPAC1F7.05	SPAC1F7.05.1:exon:1-SPAC1F7.05.1:exon:2	int_861	306	177	126	3	0	101	4	3	A;A;A;A	UGUACUAACUG;AUGUACUAACU;AGCAAUAAUGU;ACUGGGGAGUA	9;10;17;225	261;43;1;1	dbr1_1;dbr1_2;wt_1	168	194	10.7104	10.6478	21.125	48.75	7.78211	8.12978	GTATGAAACAGGAAATAAAATACAGTTAGAAGATTAGTAGAAATTTTGTTACAACGTTGCCGTTTCGAAAAATGTCGTGATTTTACTGGGGAGTAAATGTTTAAAGAAACTGAGATTTTTCTATTTGTTTAAGCGTGTCATTCAGTATTCACTGTTTGTTGTGTGCAGAGATGTTTAAGCAAATGTTCTTTTAGCCGTTTGCTCTACTTCCAAGTGTTCGGTTGATTGCTGACAGATTCGTTGCTGGTGGCGTTGTATTCAAAATTGACTGACTGTTGACATTGAATCGAAAAGCAATAATGTACTAACTGTATAG	UACUAAC	UACUAAC	9	261	UGGGGAG	225	1	NA	No	YES	No	No	No	NA	NA
I	3909735	3909872	138	-1	SPAC323.02c	SPAC323.02c.1:exon:3-SPAC323.02c.1:exon:2	int_2028	117	76	41	0	0	43	2	2	A;A	GAUGCUAACUU;AGAUGCUAACU	13;14	106;11	dbr1_1;dbr1_2	83	82	8.03349	8.19177	4.66667	6.38462	7.5791	7.50419	GTAAGTCAAAATTATTTTATTTTTATGGAACGATGTGGCTATTGTGTTAATGCTTTTGTTTTTTGATTATCTTCGTACACCTGCCATTGTTTGGATTCCTTTTGTTGTAATTCGTTAAGATGCTAACTTCCTATACAG	UGCUAAC	UGCUAAC	13	106		NA	NA	NA	No	YES	No	No	No	NA	NA
III	749050	749159	110	1	SPCC14G10.04	SPCC14G10.04.1:exon:2-SPCC14G10.04.1:exon:3	int_4532	479	258	221	0	0	129	4	2	A;A;A;A	UAUACUAACAA;UUAUACUAACA;AGAUUUUAUAC;UUUAGAGAUUU	16;17;22;27	407;37;19;16	dbr1_1;dbr1_2	104	71	8.17533	8.08806	21	14.4	7.51299	7.55482	GTAGGGCAGAAATATGAATACTGTGAATTTCGCGACACAAATTGATTTTAGTTCTTTATTTGCACTTCATAAGTTCTTTAGAGATTTTATACTAACAAATTTTTGTATAG	UACUAAC	UACUAAC	16	407	AUUUUAU	22	19	NA	No	YES	No	No	No	NA	NA
I	375831	376093	263	-1	SPAC630.14c	SPAC630.14c.1:exon:4-SPAC630.14c.1:exon:3	int_1190	112	64	48	0	0	48	2	2	A;A	CUUACUUACCA;UUUUCUUACUU	11;15	111;1	dbr1_1;dbr1_2	117	70	7.00368	6.76537	29.5	23.6667	3.51928	3.05692	GTAAGTTCAAGCTTGCATTGTAGCTTTTGGCAACAGCATTTGTTTTTTGACTTGATCAAGTTTATAGATACTTTTTGTCTTTCACTTTATTGTTTGCATCTGGTATGTTGTACACCGTATGTTCCCAGACAATTTTTTAATGCTGTCATTAATTCGTTTGAATTCCTTGCGGCTTTTGTTCATTTTTTGTAAAACAAAATACTATTGCCGAAACTATTTTGCTTCCTCGTTTTAATTTGGATTTTCTTACTTACCATTCACAG	UUUUAAU	UACUUAC	11	111	UUCUUAC	15	1	NA	No	No	No	No	No	NA	NA
I	727902	727986	85	-1	SPAC22G7.01c	SPAC22G7.01c.1:exon:2-SPAC22G7.01c.1:exon:1	int_1274	372	204	152	7	9	91	2	4	A;A	AAUAUUAACAA;GAAUAUUAACA	12;13	341;31	dbr1_1;dbr1_2;wt_1;wt_2	26	16	6.56601	6.85782	27	17	5.18284	5.0694	GTAAGTAGATAAATTAATATGCTAACTTACATAAATCTCAAGTGAAATAAAGAACCCGCTGAACTGAATATTAACAATTATATAG	UGCUAAC	UAUUAAC	12	341		NA	NA	NA	No	No	No	No	No	NA	NA
III	2387187	2387490	304	-1	SPCC1827.06c	SPCC1827.06c.1:exon:2-SPCC1827.06c.1:exon:1	int_5348	434	246	187	1	0	118	3	3	A;A;A	AUGACUAACCA;CAUGACUAACC;ACACAUGACUA	11;12;15	330;100;4	dbr1_1;dbr1_2;wt_1	170	123	9.63931	9.67528	24.4286	17.7143	6.87972	6.6413	GTATGTTTAAATTTAGAATGGTAATGTTCTGTCAAAACTGCAAACGATTGCTCTATGTACATTAAAAAATGCATAAAGTTAAAGGATTGACTGTTACAAAATAATTTGTGTTTACTTTTTAGGTTCCTTGTTTAATTGGTCTACATTTTAATTGTACACTTTTTGAATTAAATTGCCTGGAAAGACTCACATTTTATCATTTTAATTCCATGTCTTTAGTACTATAAGTTTTTGATGAACATTAAATTTTCAGTTCCGTGTCACTGACTAGTGTTTTTGGATACACATGACTAACCATAAATAG	GACUAAC	GACUAAC	11	330	ACAUGAC	15	4	NA	No	YES	No	No	No	NA	YES
I	4426269	4426458	190	-1	SPAC16.02c	SPAC16.02c.1:exon:7-SPAC16.02c.1:exon:6	int_2149	71	42	29	0	0	40	3	2	A;A;A	UAUACUAACGU;UUAUACUAACG;UUUUUAUACUA	9;10;13	64;6;1	dbr1_1;dbr1_2	0	0	9.04999	9.26987	1	1	2.79052	-16.6096	GTACGTTGTTACGTTTCCATTAATATGTGATTAGTGGGCGATTTGGCATTGCACGCGATTGCTGGTTCTAACGATTTTGTTCACTTCACATGTGAATCAGCTCTGAGTAGTGACTATATACGGTGTTATCGCTTGCAAAATCGCATTGTCCTATAAAAATTACGGCAATATTTTTATACTAACGTATCAG	UACUAAC	UACUAAC	9	64	UUUAUAC	13	1	NA	No	YES	No	No	No	NA	NA
II	343628	343770	143	-1	SPBC1271.12	SPBC1271.12.1:exon:4-SPBC1271.12.1:exon:3	int_3416	25	15	10	0	0	20	2	2	A;A	GUUUCUAACCA;AGUUUCUAACC	19;20	21;4	dbr1_1;dbr1_2	198	166	7.5863	7.88681	39.8	55.6667	7.60309	7.59714	GTAAGGATATACCATTAATGATAGTCGGAAGGATTTCGTGAAACAGTAATTCGGGTCTTTATCGCTCGTTTGTTTGCACTTTACTGCATCCATCCCCTTATTTGTCATATCTTTTTAGTTTCTAACCAAAGTTTTTTTGTTAG	UUCUAAC	UUCUAAC	19	21		NA	NA	NA	No	YES	No	No	No	NA	NA
I	5206957	5207060	104	1	SPAC19D5.03	SPAC19D5.03.1:exon:1-SPAC19D5.03.1:exon:2	int_1078	152	80	72	0	0	36	2	2	A;A	AAUUCUAAUGA;CAAUUCUAAUG	16;17	141;11	dbr1_1;dbr1_2	8	3	5.49522	6.05432	1.125	2	3.77046	3.37691	GTATGTTTGAATATAAATTTAGGACTGTCTCAATTATGTAGTTAACGAGAGTGGAGACTTTACCAAATATTGATAATGTCCAATTCTAATGATATGTGACTTAG	UUCUAAU	UUCUAAU	16	141		NA	NA	NA	No	YES	No	No	No	NA	NA
I	2116018	2116192	175	-1	SPAC20H4.03c	SPAC20H4.03c.1:exon:3-SPAC20H4.03c.1:exon:2	int_1616	184	111	73	0	0	62	2	2	A;A	AAUACUAACCA;AAAUACUAACC	14;15	179;5	dbr1_1;dbr1_2	14	11	8.38473	8.37091	15	12	5.41318	5.45512	GTAGGTTTATTACATGCAATATGGTAGTATTCTCGCACGGATTGTTGACAATATATTACATGAATTTTGCAAATTTCACTTAATAGAAATAACATCTTTCTTAAAATACGAATTCCACAAGAGTACCAACATTTGATGGAGAATCGGTATTCAAAATACTAACCAATGATGCTAG	UACUAAC	UACUAAC	14	179		NA	NA	NA	No	YES	No	No	No	NA	NA
III	1976264	1976347	84	-1	SPCC18.11c	SPCC18.11c.1:exon:2-SPCC18.11c.1:exon:1	int_5259	98	56	42	0	0	50	2	2	A;A	UUUGCUAACUG;AUUUGCUAACU	13;14	81;17	dbr1_1;dbr1_2	108	53	6.27779	6.46481	18.1667	9	6.14149	5.96686	GTAAGCAAAATATGAGTTAAAGTTTCAAAAAAGATAGTAAAAGAAAAGGGAAATGATATGGACATTTGCTAACTGATGGAACAG	AACUGAU	UGCUAAC	13	81		NA	NA	NA	No	No	No	No	No	NA	NA
I	406033	406133	101	1	SPAC31A2.10	SPAC31A2.10.1:exon:2-SPAC31A2.10.1:exon:3	int_50	77	41	36	0	0	36	3	2	A;A;A	UCCACUAACUU;UUCCACUAACU;CUUUUCCACUA	15;16;19	66;10;1	dbr1_1;dbr1_2	6	6	4.86702	5.17901	7	1.75	3.72639	3.8807	GTATGCTACAGGAGCGATTATTGTGAAAATACGCTCTTTACTGAGAACTTAATGTCTGTTAATTCTTGAATTTTGCTTTTCCACTAACTTGAATTTTACAG	CACUAAC	CACUAAC	15	66	UUUCCAC	19	1	NA	No	YES	No	No	No	NA	NA
II	1535465	1535606	142	-1	SPBC83.14c	SPBC83.14c.1:exon:3-SPBC83.14c.1:exon:2	int_3692	633	321	312	0	0	147	2	2	A;A	CGUACUAACAU;UCGUACUAACA	13;14	544;89	dbr1_1;dbr1_2	279	203	7.33687	7.12118	56	51	6.05105	5.80419	GTATGTCTTCACTGTAAAGTGAAATCAATATGGAATTTTTGTGCTCTTTTTTGTTCCTAGGTGTCTCATGTTATATTCTGGTTGGTGAACTTTCAATTCTTTTCCTTATTTTTATCTGCGCTCGTACTAACATGCTCCTTAG	UACUAAC	UACUAAC	13	544		NA	NA	NA	No	YES	No	No	No	NA	NA
II	4244090	4244359	270	1	SPBC16G5.16	SPBC16G5.16.1:exon:1-SPBC16G5.16.1:exon:2	int_3326	101	73	28	0	0	49	2	2	A;A	UUUACUAACUU;CUUUACUAACU	10;11	90;11	dbr1_1;dbr1_2	7	1	8.98736	8.75035	1	2	3.23439	3.03682	GTAAGATGTCAATTTCTTTGCTCTATTTATGTTTTGCATAATTTTATTATTTGAGTTGGGAACTGAGAACTCACTTCACCCAGTTACCGCTTTCTCTGAAGTTGATTGTAGCTTGATTGATTTCAGTTCAGCTAGAGAGCATGCGGATAACCTTTGTCGTTAATTTATTATTTTTTTGGCTTTTATTGCTCTTTTTCTATCTTATTTGCATTAATTTGGATGAGCGATTAGAAATAAATATAAATTTCTGTTCTTTACTAACTTTTTCAG	UACUAAC	UACUAAC	10	90		NA	NA	NA	No	YES	No	No	No	NA	NA
I	2426280	2426413	134	1	SPAC6B12.08	SPAC6B12.08.1:exon:1-SPAC6B12.08.1:exon:2	int_523	60	36	24	0	0	28	2	2	A;A	UUUACUAAUCA;CUUUACUAAUC	10;11	50;10	dbr1_1;dbr1_2	3	5	5.36468	5.6673	4	1	4.3221	4.38482	GTATGAAAACTTGTTTTCAACTTAATCAATCAACATAGAATATAAATTTACAGCTTTTCGATCTGTGATTAAAACATAATCGTTTAAGTTGTGAAGAATTGATCGCCTTTGTGTATCTTTACTAATCATAACAG	UACUAAU	UACUAAU	10	50		NA	NA	NA	No	YES	No	No	No	NA	NA
I	1923086	1923192	107	1	SPAP14E8.02	SPAP14E8.02.1:exon:1-SPAP14E8.02.1:exon:2	int_408	30	11	19	0	0	16	3	2	A;A;A	UUUACUAAUAU;GAAUCUAACUU;UUUUACUAAUA	12;22;13	26;3;1	dbr1_1;dbr1_2	61	49	6.38221	6.90883	5.16667	50	5.36191	5.26124	GTAAGGTTGATTCCACGGTGATTAGTTAAGAAAACTGTGTAAACCAAAAGAGAATCATGCCTCTTTACCAATTGACTTGAATCTAACTTTTACTAATATTAATTTAG	UACUAAU	UACUAAU	12	26	AUCUAAC	22	3	NA	No	YES	No	No	No	NA	NA
III	1615189	1615435	247	-1	SPCC777.10c	SPCC777.10c.1:exon:5-SPCC777.10c.1:exon:4	int_5176	14	8	6	0	0	12	1	2	A	UAUACUAACAA	18	14	dbr1_1;dbr1_2	6	3	5.3929	5.02271	7	4	2.69741	2.54177	GTAGGTTAATTACAATTTTTTGGGGGGCAATGAACTATTTCTTGTTATTGCATTACAAGGAAATGATTATTCATCTCTTAACTATCATTTGATACTCATTTTTTCTACGATCCTTTATTATGGGATTTATAAGGTTCTTTACTGAGGACAATGATTATGATAAGCAATTTTAATATAAGAAATCTGGTTTGCTCCTTAACAAATTTTCTAGATTTATTTAACTATACTAACAAACGATATCTTTTAG	UACUAAC	UACUAAC	18	14		NA	NA	NA	No	YES	No	No	No	NA	NA
II	754655	754783	129	1	SPBC577.02	SPBC577.02.1:exon:1-SPBC577.02.1:exon:2	int_2485	720	419	301	0	0	94	3	2	A;A;A	UCGACUAAUGC;AUCGACUAAUG;CUGUAAAAUAU	13;14;45	687;32;1	dbr1_1;dbr1_2	549	526	9.92984	9.98699	5.61224	8.78333	9.38868	9.61875	GTAAGTGAGATAAGTAGAGGTTTCAGCAGCTTATGGAAGAGAAAACTGTTTTCATCTTTCGTTCGTTAAAGTTGTCTCTGTAAAATATATTCAGTGTTAGGAATGACCATCGACTAATGCATGTTTTAG	GACUAAU	GACUAAU	13	687	GUAAAAU	45	1	NA	No	YES	No	No	No	NA	YES
I	4468769	4468967	199	-1	SPAC9E9.13	SPAC9E9.13.1:exon:2-SPAC9E9.13.1:exon:1	int_2160	457	249	208	0	0	105	4	2	A;A;A;A	GUUACUAACAU;UGUUACUAACA;GCUUGUUACUA;UUACAACAAAA	12;13;16;187	428;27;1;1	dbr1_1;dbr1_2	252	169	11.4662	11.9346	3.89231	4.47368	7.68817	7.55979	GTATGTTACAACAAAAATCCGTAACACCTTATACTGCGAAGAATCTGAGACGAGAATAAGCCGAATAATTCTCGTTTGAAGATAGTATTTTCTTCGGTTTCTTCACATAAAATATTTGATTAGCGGTTTTGTATATTCTGTTTTCCAATGTACATTTATTTGCGTGTTTTATTAGTGCTTGTTACTAACATTCGTTTAG	UACUAAC	UACUAAC	12	428	UUGUUAC	16	1	NA	No	YES	No	No	No	NA	NA
I	2152541	2152698	158	1	SPAC23C11.11	SPAC23C11.11.1:exon:2-SPAC23C11.11.1:exon:3	int_465	198	137	61	0	0	66	2	2	A;A	GAUACUAAUAU;CGAUACUAAUA	11;12	170;28	dbr1_1;dbr1_2	90	78	8.75382	8.64776	91	26.3333	7.45538	7.5868	GTAAGAATAAAAAAAAAAAGCTTTTTGTATTGAATCGTCTTGAAACTTGAAGGAGAAGAAATTTTGTGCTTTTCCGTCTATTGAGTTTATACGACTCTGGCTTTTGAACGTTTGATATCCATCAAACTATTGTATTTGTCGATACTAATATTTTATAG	UACUAAU	UACUAAU	11	170		NA	NA	NA	No	YES	No	No	No	NA	NA
II	2426596	2426784	189	1	SPBC21D10.09c	SPBC21D10.09c.1:exon:1-SPBC21D10.09c.1:exon:2	int_2889	191	111	80	0	0	69	2	2	A;A	AAUGCUAAUCU;AAAUGCUAAUC	12;13	166;25	dbr1_1;dbr1_2	15	4	7.86309	7.87324	1.6	0.714286	3.75658	3.37854	GTAAGTAAAGATGTGAGAAGATGGTAACAAAATGGGTTTGCACACAAAATAGGGTCTTTCTCATTGGATATATGCAGAACACCTATGTTATTACAAATCCATACTTTTCCATATTTTGGGGAAGTTTGTTTAAAAATACAACGATTCTTTTTTCTTTATGTATGTGCCGAAATGCTAATCTCTTTATAG	UGCUAAU	UGCUAAU	12	166		NA	NA	NA	No	YES	No	No	No	NA	NA
II	2394610	2394702	93	-1	SPBC36B7.08c	SPBC36B7.08c.1:exon:3-SPBC36B7.08c.1:exon:2	int_3863	463	264	198	1	0	122	2	3	A;A	AAAACUAACAC;UAAAACUAACA	15;16	413;50	dbr1_1;dbr1_2;wt_1	6	8	7.12173	7.40426	1.4	9	5.33596	4.96035	GTACGAAAACAGGTCTTAAAAAAATAAGGCGAAAGCATGAATAGATGATATGATAGATGTCAATGTATTGTAAAACTAACACAAAAATCGCAG	AACUAAC	AACUAAC	15	413		NA	NA	NA	No	YES	No	No	No	NA	NA
I	4007149	4007591	443	-1	SPAC27E2.03c	SPAC27E2.03c.1:five_prime_UTR:2-SPAC27E2.03c.1:exon:1	int_2064	157	88	69	0	0	65	2	2	A;A	GUUGCUAACCA;UGUUGCUAACC	16;17	140;17	dbr1_1;dbr1_2	91	66	9.16246	8.96492	3.68	4.46667	5.35329	5.09331	GTAAGCAAGAATAGAAAAATGGAAGTCAACGTGTTATGGGTGCAAAAGAATTTAATAATTACTGAGTCTATTTTTTCCCATGTTTGGTGATTGTTTGAGGTTTTTGAACTACGAATTCCAAGACTCGATCACAATGGTTAAATTTTAACTGCATTTGGGATTTTGTTTTATAAAAGTTATACAGCTTATTTAAAAAGACCTGATAAATATGTCTTTTGGGTATCGATTCTATGTTGCAAAAGTTTAAAATTTTATTACTCTTGTATTAGATTTCGCTTGTTCATATTTTTTGCTCTGTTGTTGAAAGCATCCTAAAGTGATATATATAATTTGGAAGTGTAGAAGAAGTCTGAGAGTGTATTGTTTTTGTTTACCTTACATGAATTCCTAAAAGATCCC…	UGCUAAC	UGCUAAC	16	140		NA	NA	NA	No	YES	No	No	No	NA	NA
II	1700402	1700497	96	1	SPBC19C2.12	SPBC19C2.12.1:exon:2-SPBC19C2.12.1:exon:3	int_2718	50	21	29	0	0	18	2	2	A;A	UUUACUAAUGC;UUUUACUAAUG	15;16	49;1	dbr1_1;dbr1_2	2	4	5.19991	5.31116	0.3	0.3125	5.61921	5.63145	GTACGTCCAAGACTTTTCTCTTATTATGGTGATCCTCTTAGTTTTATAAATATGAACTCCTTAAAATAGTGTTTTTTACTAATGCTACGATAATAG	UACUAAU	UACUAAU	15	49		NA	NA	NA	No	YES	No	No	No	NA	NA
II	1233561	1233687	127	1	SPBC725.16	SPBC725.16.1:exon:1-SPBC725.16.1:exon:2	int_2590	30	17	13	0	0	25	2	2	A;A	GUUACUAACUA;UGUUACUAACU	13;14	18;12	dbr1_1;dbr1_2	49	37	6.40917	6.18641	7.14286	2.71429	4.76434	4.43449	GTTTGTGTTAACTTCTTACTATATCAATAGGTTTAAAACTACTTAAATAACATAAAATTTTTGTCTCTGTTGTTTTTATTTATCAATTTATACTTTTTTGGATGCCTGTTACTAACTATTCATTCAG	UACUAAC	UACUAAC	13	18		NA	NA	NA	No	YES	No	No	No	NA	NA
I	3203924	3204067	144	1	SPAC1486.06	SPAC1486.06.1:five_prime_UTR:1-SPAC1486.06.1:exon:1	int_669	11	6	5	0	0	10	2	2	A;A	GACACUAACUU;ACAAUUGACAC	11;17	10;1	dbr1_1;dbr1_2	22	15	5.64019	5.6059	23	16	4.0886	4.12888	GTATGCTCGTTTGTTAAAAATAATATAATTTGATTTCCTGCAATTTTGGCGGGTATACTTTTCGAGTCTGCATTATAACATGCGCATGTAGTATAAAATATAATGTTTCACATCTATTTGACAATTGACACTAACTTGAAAAAG	CACUAAC	CACUAAC	11	10	AAUUGAC	17	1	NA	No	YES	No	No	No	NA	NA
II	230451	230615	165	1	SPBC660.16	SPBC660.16.1:exon:2-SPBC660.16.1:exon:3	int_2389	445	266	179	0	0	95	2	2	A;A	UUUAUUAACUU;GUUUAUUAACU	14;15	419;26	dbr1_1;dbr1_2	0	0	9.0953	9.05419	0.5	0.5	-16.6096	-16.6096	GTATGTGAAAAAGAATATAGATATTTTCCATCTTGGAATTTCGTGTTTCCCTTTTCCTCTCTTTATCTCTTTTTATTTTTTTTTCTTTCGAGAAGAGCCGAGCTGAGTTGGGGATGCTGTTAGGAATTTTTTATAGCGGTCTGGTTTATTAACTTTTTGCCAAAG	UAUUAAC	UAUUAAC	14	419		NA	NA	NA	No	YES	No	No	No	NA	NA
II	3652564	3652679	116	1	SPBP8B7.11	SPBP8B7.11.1:exon:2-SPBP8B7.11.1:exon:3	int_3217	140	97	43	0	0	58	2	2	A;A	UUUAUUAACGU;UUUUAUUAACG	9;10	129;11	dbr1_1;dbr1_2	129	138	7.91625	7.92306	43.3333	34.75	7.49096	7.62336	GTATGCTTTAACACAATTCTTATATGTAAAGTTTTTGAGGTTGTGATATTCTGCTTGCGATTTTCGAAACTCTATGATCGTTGTCTTGCCCAATAGTCATTTTATTAACGTGTTAG	UAUUAAC	UAUUAAC	9	129		NA	NA	NA	No	YES	No	No	No	NA	NA
I	1578657	1578792	136	1	SPAC23H4.16c	SPAC23H4.16c.1:exon:2-SPAC23H4.16c.1:exon:3	int_345	237	139	97	0	1	102	2	3	A;A	GGUACUAACUA;UGGUACUAACU	11;12	189;48	dbr1_1;dbr1_2;wt_2	15	17	4.93188	5.07169	8	9	4.54832	4.27826	GTATGTGTAAAGAGAAAAAGAAAGCAGTTTATTTTTTTTTGTTTCGATACGTCAATTTTCGAACGAAACTTTTGTGATTGAATTTTTTTTTTGCCATAACAAATGCAAGTTGTTTGTTGGTACTAACTATGCATAG	UACUAAC	UACUAAC	11	189		NA	NA	NA	No	YES	No	No	No	NA	NA
I	2517790	2518194	405	-1	SPAC23H3.13c	SPAC23H3.13c.1:exon:2-SPAC23H3.13c.1:exon:1	int_1713	233	131	102	0	0	115	4	2	A;A;A;A	CAGUCUAACCA;UCAGUCUAACC;AAGCAGAAAAG;GUUUCUUACAA	15;16;331;30	200;30;2;1	dbr1_1;dbr1_2	0	3	10.8742	10.8763	0.333333	4	4.82137	4.62082	GTACGTAAACTACTCAATGTTGTTGTTGTTGTTCAATAGTTATATATGCTTGGGCAGTCGAGCAAAAAAGCAGAAAAGATTGAGAAAAAAAATAAAGAAACGAAATGAGTGAAACTATTTACGAAACAGAGAAACTGTTTAAGAAATGACAGAAAATGGTTTGTCTAATTGCGTCTACGTTCTCTACTCTTGGTTACCCTTTCCCTTCAATACTCAGTCAGTGAAGGTGACTTTGATAACGTTCTTCTAGTTAACCACTTTTCGTCGTCGTTGCATGTTGTAATCAGTTGCTCTACACTCTTACCGTTTCTCTCCATTGCATAGCACAGATTTTTTGTTTGATTCCTATAGCAAATTTTCCTTCCTTTGTTTCTTACAATCGTCAGTCTAACCATTGTT…	GUCUAAC	GUCUAAC	15	200	GCAGAAA	331	2	NA	No	YES	No	No	No	NA	YES
II	517481	517684	204	1	SPBC1685.10	SPBC1685.10.1:exon:2-SPBC1685.10.1:exon:3	int_2441	349	193	155	0	1	93	3	3	A;A;A	AUUGCUAACUA;CAUUGCUAACU;AAGACUCAUUG	13;14;20	296;38;15	dbr1_1;dbr1_2;wt_2	1124	917	11.8248	11.8657	1125	918	10.4543	10.5285	GTAAGTTTTCTTGAAAATTTTTCTCCAACAATAGTTTGCTTTCCAAATGCCAAATGTTTAAAAGAATGAAACCTTATTCTAATTCTGTACTTTCGAGAATAAACTGTTAATATTTTTCAATTTGTTGAAAGTGGCAACATGGTGGCAATAGGGAAAAATTAGAATGGTTTGAACTCAAAGACTCATTGCTAACTATTTTTTTAG	UGCUAAC	UGCUAAC	13	296	GACUCAU	20	15	NA	No	YES	No	No	No	NA	NA
I	3655254	3655469	216	1	SPAC8C9.08	SPAC8C9.08.1:exon:1-SPAC8C9.08.1:exon:2	int_749	59	43	15	0	1	34	2	3	A;A	UUUGCUAACUU;AUUUGCUAACU	10;11	48;11	dbr1_1;dbr1_2;wt_2	367	432	12.0238	11.8201	17.5238	18.0417	9.47271	9.4959	GTAAGTTTTAATATTTACGGGTCAAAATAGGTTGAGTACGCGATTGCGCGGATTGTTTTTTTAGGAGAGAATTAGTTGACTTTTGATAATGATGTAGATGATCTTTTTTCTTCATTTTACATCTATAGTACTCAACATAATGGAAATTAGGATTTGACCCCCTTTAACACGGACTTTCATTTTTTATTTGTTTCTATAATTTGCTAACTTCATTAG	UGCUAAC	UGCUAAC	10	48		NA	NA	NA	No	YES	No	No	No	NA	NA
II	3208167	3208458	292	-1	SPBC776.15c	SPBC776.15c.1:exon:2-SPBC776.15c.1:exon:1	int_4043	68	37	31	0	0	36	3	2	A;A;A	AUCAUUAACUA;AAUCAUUAACU;AAAAAUCAUUA	13;14;17	66;1;1	dbr1_1;dbr1_2	273	248	8.5487	8.60611	137	83	7.52749	7.61112	GTATGTGTTGTTGATCATGATGTAGATATTGTTTGTTAAAGGAGACGGGATATATATGTTAGTACTCAACTTGCTCATAAGAATCAACTTTTGCTAAGTGCATCTGTCTTAAACTTTATTTTGAATCAAGTGGACGCTGTTGATTTCAAAATAATTAAATAATTCTTCACAAGGTCATATTCACACATGAATAGGAATTCTCAACTATGTTTTCTTCCTTTCACTCAGTATCTTCGGGATTTACTTTTTCTTATGTTGTTTCAATTTCAAAAATCATTAACTATATTTTTAG	CAUUAAC	CAUUAAC	13	66	AAAUCAU	17	1	NA	No	YES	No	No	No	NA	NA
II	1186641	1186737	97	-1	SPBC4.02c	SPBC4.02c.1:exon:4-SPBC4.02c.1:exon:3	int_3622	396	237	155	0	4	61	2	3	A;A	GUUAUUAAUGU;AGUUAUUAAUG	10;11	384;12	dbr1_1;dbr1_2;wt_2	8	1	9.54458	9.82227	0.375	0.0740741	4.2785	4.22673	GTAAGTATTGGAATTCGGGTTTCGTACTGTCGACTTTGGCATTGAAAAGATGGAATCAGAACATATATCATGTGTCTATAGTTATTAATGTGTATAG	UAUUAAU	UAUUAAU	10	384		NA	NA	NA	No	YES	No	No	No	NA	NA
II	4241859	4242150	292	-1	SPBC16G5.15c	SPBC16G5.15c.1:exon:2-SPBC16G5.15c.1:exon:1	int_4311	94	65	29	0	0	39	3	2	A;A;A	CUUACUAAUUA;UCUUACUAAUU;UCGUCUUACUA	12;13;16	88;4;2	dbr1_1;dbr1_2	12	8	7.90076	7.55829	6.5	4.5	5.85586	5.87156	GTATGTTAAAAATCATTTACTAGAATAGTGTTGGTTCGTCGTGATTTGCGACAGGACGGAATATTGATGGTTTCAGCAGCGCATAATTTATGCTTTACTCTTTCATAAGTTCTATGGTTTTCTCGTGTTATTTGTCAATTTTAAACGAATGTTTGGTTATTTTATAAATGCGCGTTAAGGATTTGTCAAATTATCAAGAAAATAATTATTTCCGTCCTAGTTCAAATAAATGCAGGAAATTATGCCAATTATTTTTTTTTATTTCTTTTTCGTCTTACTAATTATCTACTAG	UACUAAU	UACUAAU	12	88	GUCUUAC	16	2	NA	No	YES	No	No	No	NA	NA
III	659629	659708	80	1	SPCC16C4.01	SPCC16C4.01.1:exon:3-SPCC16C4.01.1:exon:4	int_4510	40	17	23	0	0	32	2	2	A;A	UCGACUAACAG;GUCGACUAACA	10;11	37;3	dbr1_1;dbr1_2	23	18	2.86091	3.86893	12	19	4.63074	4.57108	GTATGAACATTTTTATTGATAAAAATTTTTGTCTTTAGCTCTTTTTCCTCATGGTGAAGCTAGTCGACTAACAGATATAG	GACUAAC	GACUAAC	10	37		NA	NA	NA	No	YES	No	No	No	NA	NA
I	5384759	5385009	251	-1	SPAC3G6.03c	SPAC3G6.03c.1:exon:2-SPAC3G6.03c.1:exon:1	int_2353	21	15	6	0	0	16	2	2	A;A	UAAACUAAUGU;GUAAACUAAUG	17;18	18;3	dbr1_1;dbr1_2	2	8	5.9275	5.70138	1.5	4.5	4.18538	4.54662	GTAAGAAAAATAAAAAATGGAGACAATTTTTTGAATCATGTAATCTACCCAAGCAATTGCTTCCTAAAAAAAGTATCAATTGCTGTCGTTATTATATTTTCCATGAAGCATTGCCCGTAAAAATTGTGTTGTATCTTAATAAATTATTCTTATTTATGATTCTCTGTTTTGTGTTACTTAGAAGTTTTGGAGTTCGTCTCTTAATTTCATTCGTTTGGTCGTGTTCGTAAACTAATGTTGATTTAAAATAG	AACUAAU	AACUAAU	17	18		NA	NA	NA	No	YES	No	No	No	NA	NA
II	3004673	3004782	110	1	SPBC2D10.20	SPBC2D10.20.1:exon:3-SPBC2D10.20.1:exon:4	int_3018	124	81	42	1	0	54	2	3	A;A	GGUCCUAACAU;UGGUCCUAACA	9;10	109;15	dbr1_1;dbr1_2;wt_1	6	6	6.91605	6.7563	0.636364	0.875	3.37549	3.6673	GTACGCATCCTACGTAGGTCGTCAAATTAAGAGCTATCACTTGTGAAAAATTTACCGTTGCATCGTTTAAAACCATATTATTATTTAGTTATTTGGTCCTAACATTTTAG	UCCUAAC	UCCUAAC	9	109		NA	NA	NA	No	YES	No	No	No	NA	NA
II	296534	296705	172	-1	SPBC1773.07c	SPBC1773.07c.1:exon:2-SPBC1773.07c.1:exon:1	int_3408	313	191	122	0	0	79	2	2	A;A	AAUACUAACUU;GAAUACUAACU	12;13	280;33	dbr1_1;dbr1_2	69	108	9.13781	9.08574	70	54.5	6.6726	7.52026	GTATGTCCAATTAGATTAATGGTTGCATTTCTAGACGTTGAAAAGACATTATGCTACGTGTTGTTGAAATACTTTTTCTTAATACATTAAAGCTCACTGTCCTTTCGTGTCTTGACTATTTCTTTTCTCTGGTTTCTCAGAATGTAGTATCTGAATACTAACTTGTTTTTAG	UACUAAC	UACUAAC	12	280		NA	NA	NA	No	YES	No	No	No	NA	NA
III	89137	89420	284	-1	SPCC613.05c	SPCC613.05c.1:exon:2-SPCC613.05c.1:exon:1	int_4876	625	407	217	1	0	138	6	3	A;A;A;A;A;A	UUUGCUAACUU;GUUUGCUAACU;GACAUGAAAUA;UCUUCUAAACA;GGUCAAAAACA;GGACAUGAAAU	12;13;196;45;122;197	532;76;14;1;1;1	dbr1_1;dbr1_2;wt_1	2284	1860	12.999	12.8421	26.8824	36.4902	11.2801	11.309	GTAAGTAAATTCTTAGGAAATAGGTATTGCTTTGTGAGAAGCAGTACTGGAAATGTATTTAGAAGGCATCTAAGAACAGTGGACATGAAATAACCTGCGTTGGCATATTTTTTCCGTCTTTCTGGACCGATGGAAAAAGTGAAAAGTTTTTTCCAGGTCAAAAACAGCTTGTAGCACCTTTTTAGATGTCGCCAACCAATTCTTTGCATCGGTTTTTATTAGTTTCTATTGATCTTCTAAACATTATGATGTTCCTTGTTCAATGTTTGCTAACTTATTTATAG	UGCUAAC	UGCUAAC	12	532	CAUGAAA	196	14	NA	No	YES	No	No	No	NA	NA
II	754971	755149	179	1	SPBC577.02	SPBC577.02.1:exon:2-SPBC577.02.1:exon:3	int_2486	95	43	52	0	0	46	2	2	A;A	CAAGCUAACAA;UCAAGCUAACA	15;16	79;16	dbr1_1;dbr1_2	336	309	8.42402	8.63881	48.1429	38.75	9.52382	9.71939	GTATGTTATATAAACTACTAAGAAAGATTAACTCAGTTACTTTTTATTGAGGGAACTACATTTCCTTAAAGCATTTTGCGAAGGAATTCTTCCTAAAGCGTTGATAATTCGTGAAACAAATGATCAGCTCTGAGTTAATCGTTCATATAAGTGAACTCAAGCTAACAAGTTTTCTATAG	AGCUAAC	AGCUAAC	15	79		NA	NA	NA	No	YES	No	No	No	NA	NA
I	1041746	1042069	324	1	SPAC23C4.08	SPAC23C4.08.1:exon:2-SPAC23C4.08.1:exon:3	int_237	46	25	21	0	0	26	2	2	A;A	UUAUCUAACAC;GUUAUCUAACA	14;15	44;2	dbr1_1;dbr1_2	3	3	9.2794	9.27143	2	1	1.99302	2.93691	GTAAGTATCATTAATAGTGCAAAGCTGTAAACGGCGGAGCGGAAATGAGGTTACCGTCTGCAATATCAAGTATAACTCAATATGAAGCATCTTTTTTTGCAAACCTTTTATCTAACGGGTTAATTTGTGGAAATTTGTTTCATTTCTGAGGAAAACGAGAATGCCCGAGTGTGCTCTCCATACAGTCACACTCGTACAATTTCTCATGACCAAACGTCAAATTGCTTTTACTATGCTTGACCTGTTAAGGGTTTTCACCACTTCTTTACATGATTATCTTCTTGTACTTAAAAACTTTTTCCGTTATCTAACACCTAAAAATAG	AUCUAAC	AUCUAAC	14	44		NA	NA	NA	No	YES	No	No	No	NA	NA
I	2892176	2892431	256	-1	SPACUNK4.10	SPACUNK4.10.1:exon:2-SPACUNK4.10.1:exon:1	int_1814	366	203	163	0	0	76	2	2	A;A	UUUACUAAUGU;GUUUACUAAUG	12;13	333;33	dbr1_1;dbr1_2	113	104	11.1392	10.9803	114	52.5	7.37548	7.14808	GTAAAGAAATAGAGAAGGGAGGGAAGAAGGGACAGTAGTGGGAGATGGAGGTTGAAGGATGAGCAGAGGATATGGAACTAAAAAATTCAAGAGTGATTGCTTGTTTGTTGTTCTGTTGCTTCTTCTCCCTCGTCCTCTGCTTCTGCGATTCTGTTGGATTTCTTGGCTATCTAGCGGATCTCCTAGCTTCCCGACAAAACCTCAACATATGCGCTTAGTTGTGTTTACCTGTTCTTGTTTACTAATGTCGTTTTAG	UACUAAU	UACUAAU	12	333		NA	NA	NA	No	YES	No	No	No	NA	NA
MT	10857	13382	2526	1	SPMIT.05	SPMIT.05.1:exon:1-SPMIT.05.1:exon:2	int_5361	181	90	33	26	32	52	2	4	A;A	GCGUCUUAGUU;CCAUUCUAAAA	8;819	180;1	dbr1_1;dbr1_2;wt_1;wt_2	1688	1497	11.5427	11.4062	1.03683	1.29361	10.8379	10.686	TTGCGCCGTTGTGGTATATATGTGTACCCTCATAGAGAAAGGGATATCTTGTGTGTAAAGATATGAACAATACACTTAGGTAGCTGGGGAAACCCAATGCCGAACAGAGCATGTGTACAGAAGGTCCTTCCTGTAACGAAACAGATAAGTTCAGATGGATCAGTTCAAATAGATACGGTTAGAGCTGTATTGCCCGAATTCCAATTCCCATCTCACCCTCAGATAGGTGATTGTCTTAGCTGAATAGAGACATTCTTCTCTAGATCTTTGGTTGGCTTTTATGACCAAGGATACACACCAGGAGAAGAGAGTTGTACCAATAGTACAATTAAGGGAATGAGTGGAAAACCTACGTCTATCATCTCAAACATATATACAACTACGGGTCCCGCTAAGGTC…		GUCUUAG	8	180	AUUCUAA	819	1	NA	No	No	No	No	No	NA	NA
III	1617648	1617767	120	-1	SPCC777.12c	SPCC777.12c.1:exon:2-SPCC777.12c.1:exon:1	int_5180	326	192	133	1	0	106	2	3	A;A	UGUACUAACUA;CUGUACUAACU	11;12	280;46	dbr1_1;dbr1_2;wt_1	116	122	7.71415	7.80753	13	30.75	6.05193	5.97942	GTAAGTAATGGACTGCATTTAATGTTGTCCAAATGCTCTTGTTATGAGATTGAATTTTGAGCCTCGGAAATAAATTAAACCATCTTTGGATTTAATTGAATCTGTACTAACTAATTTTAG	AACUAAU	UACUAAC	11	280		NA	NA	NA	No	No	No	No	No	NA	NA
II	848118	848262	145	1	SPBC36.04	SPBC36.04.1:exon:1-SPBC36.04.1:exon:2	int_2506	64	42	22	0	0	31	2	2	A;A	UAUACUAAUUG;GUAUACUAAUU	17;18	60;4	dbr1_1;dbr1_2	80	83	6.04107	5.73532	16.2	14	7.77218	7.96446	GTATGTTTTTGATATAGGGCGTTGTTTAATGGGTCTCGTTTTGCTAAACAATTTTGAAACGTCGAGGTTTCTCAATTGAATGGCAATCCTATACCTTTATTTCTTTTTAATTGCTTTCATGTATACTAATTGCAAATTTTTTAAG	UACUAAU	UACUAAU	17	60		NA	NA	NA	No	YES	No	No	No	NA	NA
III	1311824	1312088	265	1	SPCC1322.11	SPCC1322.11.1:exon:1-SPCC1322.11.1:exon:2	int_4638	304	191	113	0	0	104	3	2	A;A;A	CUUGCUAACGA;CCUUGCUAACG;AUUAAAAAGUU	15;16;159	260;43;1	dbr1_1;dbr1_2	437	408	10.6833	10.6507	438	409	10.1085	10.2051	GTAAGTAATATGTTTGATTAAAAGTGCAAAGTACAAAAGTTTTTGGCTTTAATTTCGAGTGAGAGTATGGCCTAAATTGGACGGTTGCGTATGAACTCGATTAAAAAGTTGGCTTTCTTTGCCTTGGTTTCAAGGCTCATTAGCAAAGCTAGAGTCATTTTGTATTTGATAATTTCTTATATGTGCTTTTTCTCTTCTTTTTCTTTTCCTTGCTTATGTTTGAGCGGAAAATTTTAAGATTGCCTTGCTAACGAAATTTTTTTAG	UGCUAAC	UGCUAAC	15	260	UAAAAAG	159	1	NA	No	YES	No	No	No	NA	YES
II	1470956	1471075	120	1	SPBC32H8.10	SPBC32H8.10.1:exon:2-SPBC32H8.10.1:exon:3	int_2672	3	2	1	0	0	3	2	2	A;A	AAUACUAAAGC;AAAUACUAAAG	16;17	2;1	dbr1_1;dbr1_2	2	2	5.55606	5.99881	0.5	1.5	4.99521	5.30975	GTAAGTAGATGTTTGTTTAGATTCTTGTTCATTTTGACAGAATGACTTGGGACGCATCGACTTGATTGCGTTAATTGTTTTAATTAATTCATGAATAAATACTAAAGCATTACATTTTAG	AAUUAAU	UACUAAA	16	2		NA	NA	NA	No	No	No	No	No	NA	NA
I	4138719	4138979	261	-1	SPAC26H5.09c	SPAC26H5.09c.1:five_prime_UTR:2-SPAC26H5.09c.1:exon:1	int_2105	160	97	63	0	0	66	3	2	A;A;A	UUUACUAACAU;CUUUACUAACA;UCUAUCCACCU	15;16;86	139;20;1	dbr1_1;dbr1_2	235	150	9.56886	9.6569	26.2222	37.75	7.89967	7.58273	GTATGTAGTAAGCTGGCGAGTACAAGTGCAAGTGCAAGCGCGGGTGCGATTGCGATTGCGGAATAGAGATGGTTCAGGAAATACACATCATGATTGAGTTGAGTTGCAATGCGTTACTTGACATCGCATGGAGCGCTTGTGATGCCTTAATATTGTGCGCGCGCTCTTTCTATCCACCTTTGGTTCCTCTTCTACCTTGCCCTTGCCCTTGCCCTTCCCTGTGGCTGTCTTGTCGCATCTTTACTAACATTCCTCTTGTAG	UACUAAC	UACUAAC	15	139	UAUCCAC	86	1	NA	No	YES	No	No	No	NA	NA
III	873642	873949	308	-1	SPCC16A11.03c	SPCC16A11.03c.1:exon:2-SPCC16A11.03c.1:exon:1	int_5062	39	21	18	0	0	25	3	2	A;A;A	AAAACUAACAA;UUUUCUAAUAG;CAAAACUAACA	15;198;16	30;5;4	dbr1_1;dbr1_2	27	27	6.46185	6.49327	2.54545	3.11111	4.41613	4.21044	GTAAGTAAATCCATCTTATGGAAATGCCTGTTGGCCGAGTCCCGTTTGAAATGTGGAATGTTCAAGGGTTCCTTATTTTAAAATATTACCAATAAAGAAATATTTTTCTAATAGTTATTTCCAAAGTGTTTGATTGTGCGCGATTATGTGAAACTTTTACAAGAACTGTTCGCATAAATTATTTCTCTTGTATATGAACTGTTACATTATTTAATTATTATTGAACACTTTCCCGTTTCTCGGGACATAAAATTATACGATCGTATCTGTTTTTGGTGGATCGACCAAAACTAACAATGAAATTATAG	AACUAAC	AACUAAC	15	30	UUCUAAU	198	5	NA	No	YES	No	No	No	NA	NA
I	3175907	3175992	86	-1	SPAC3G9.05	SPAC3G9.05.1:exon:2-SPAC3G9.05.1:exon:1	int_1861	227	120	107	0	0	60	2	2	A;A	ACCUCUAACGC;CACCUCUAACG	14;15	215;12	dbr1_1;dbr1_2	1	1	8.31773	8.78407	2	2	1.17162	1.978	GTATGTTAAAAATTGGTTTAAAATTAAGCTGTACAATTGCTTTGACCCACGGAAACAATGTAATCACCTCTAACGCTATTTTATAG	CUCUAAC	CUCUAAC	14	215		NA	NA	NA	No	YES	No	No	No	NA	NA
III	371547	371611	65	1	SPCC1682.01	SPCC1682.01.1:exon:3-SPCC1682.01.1:exon:4	int_4449	8	2	6	0	0	6	2	2	A;A	AGUGCUAACAA;GAGUGCUAACA	12;13	6;2	dbr1_1;dbr1_2	84	78	5.60104	5.22989	4.04762	6.58333	6.51566	6.54444	GTATGTATTTTCGATTAGTGAATGATTGAAGCGACTGTGGATATCGAGTGCTAACAAGACGATAG	UGCUAAC	UGCUAAC	12	6		NA	NA	NA	No	YES	No	No	No	NA	NA
II	1776550	1776713	164	-1	SPBC18H10.04c	SPBC18H10.04c.1:exon:4-SPBC18H10.04c.1:exon:3	int_3724	576	371	204	0	1	134	2	3	A;A	UUAGCUAACUC;CUUAGCUAACU	18;19	480;96	dbr1_1;dbr1_2;wt_2	27	15	9.34492	9.21889	4	8	6.20556	5.86302	GTAAGTATTTTGTTTTTTATAATGGAAAATTTTGGATTGAATTGGAGTGGGGTGTTTTTTAGGAATCCGAAAATTTCTATTAATTTTCGGCTCTCATTTTTGGGCTCCATCATTTTTCTATTTAATCTTTTGAAATTGCTTAGCTAACTCAATTTATCTATTAG	AGCUAAC	AGCUAAC	18	480		NA	NA	NA	No	YES	No	No	No	NA	NA
II	604097	604374	278	-1	SPBC839.05c	SPBC839.05c.1:exon:2-SPBC839.05c.1:exon:1	int_3495	82	48	34	0	0	40	2	2	A;A	AUAACUAACAU;AAAAUUUACUC	12;212	80;2	dbr1_1;dbr1_2	668	605	10.411	10.5354	223	151.5	8.82643	8.96103	GTAAGTAGTTATAAAGCATGGTTGGAGTTGCAAAGTCGAAGCTCTCGGTCTATTTGAACAAAATTTACTCTTTAGTTTTGTAGCTTACTAAAGCCATAAATTGACGTTTTTTCTATGCGGCAAATATAAACATTTACTTAAACGTAGGTTCTCTTCACATGGTCCATTTGAATACACATAAAATTTTTTTTCTTTCATTCATGCTTCTCTTTGCAATCCTAATCCTTACGTTTATCTACGAAATTGATTTTTTTTGTGCATAACTAACATTCCTCTAG	AACUAAC	AACUAAC	12	80	AAUUUAC	212	2	NA	No	YES	No	No	No	NA	NA
I	2041296	2041445	150	-1	SPAC607.03c	SPAC607.03c.1:exon:2-SPAC607.03c.1:exon:1	int_1601	195	104	84	3	4	65	3	4	A;A;A	CAUACUAACAU;GCAUACUAACA;UAGCUGAAAGC	10;11;101	176;18;1	dbr1_1;dbr1_2;wt_1;wt_2	120	92	8.31534	8.5153	121	93	8.13424	8.03045	GTATGTTAATAATGGTATAAGACTTCTTCTTTGGCTACGAAATAGCTGAAAGCATGCTAGTTTCAAATGCTAGTTTCGTCGGCAATTTTATTACGGAAAATGAACTTTTCCGAAATTTATATTCGTTTTATTGCATACTAACATTGTTAG	UACUAAC	UACUAAC	10	176	GCUGAAA	101	1	NA	No	YES	No	No	No	NA	NA
II	4127997	4128103	107	-1	SPBC1861.01c	SPBC1861.01c.1:exon:3-SPBC1861.01c.1:exon:2	int_4290	134	73	61	0	0	36	2	2	A;A	AUUACUAAUUA;AAUUACUAAUU	13;14	129;5	dbr1_1;dbr1_2	24	21	7.16149	7.51079	2.5	3.14286	6.85017	6.78206	GTAAGGTTCTATCTACGCATCACAGATTTTTATTTTACAACTCCTCAAATACTCTACTGTTACTTTCCGTTTCATTTCATTGATAAAATTACTAATTATACATACAG	UACUAAU	UACUAAU	13	129		NA	NA	NA	No	YES	No	No	No	NA	NA
I	1604397	1604529	133	1	SPAC23H4.03c	SPAC23H4.03c.1:exon:1-SPAC23H4.03c.1:exon:2	int_350	32	16	16	0	0	21	2	2	A;A	CUGACUGACAU;CUUUCUGACUG	14;18	29;3	dbr1_1;dbr1_2	349	234	6.64213	6.61202	87.5	78.3333	7.68561	7.57164	GTATGGTACTATATCTAAAAGTCGTATTTACTTCAACGGCTATTTTGATTTGTTTACGTTGTTTAGATCCCTTTCTTTCTTTGAAAAAGAAATCCTTTATGAGTTTAGCTTTCTGACTGACATTTAAATGTAG	GACUGAC	GACUGAC	14	29	UUCUGAC	18	3	NA	No	YES	No	No	No	NA	NA
II	3583601	3583706	106	-1	SPBC418.01c	SPBC418.01c.1:exon:2-SPBC418.01c.1:exon:1	int_4169	197	119	78	0	0	48	2	2	A;A	AAUACUAAUCU;AAAUACUAAUC	14;15	181;16	dbr1_1;dbr1_2	97	75	5.75609	6.17778	98	38	5.98295	6.0635	GTATGTCATTATTGTTTTTAAAAATGTTGTTACCATCTACATTATAAAGGCTAAGTCAAATCGGTTTTTTTTTTCGTTTTCATCAAATACTAATCTATACTTTCAG	UACUAAU	UACUAAU	14	181		NA	NA	NA	No	YES	No	No	No	NA	NA
I	3839158	3839281	124	-1	SPAC4H3.07c	SPAC4H3.07c.1:exon:2-SPAC4H3.07c.1:exon:1	int_2017	304	171	133	0	0	93	2	2	A;A	GGUACUAACUU;CGGUACUAACU	11;12	264;40	dbr1_1;dbr1_2	280	256	7.11478	7.25613	20.0714	51.4	8.1819	8.03696	GTAAACCAACATAGGAATACGTTTGCTTTCATATGCGATGTTTTCTGGTTAAAGCTAAGTTTTACACTTCGCTACTCTACTCTCCAAGTATTTTGGAATTATTAACGGTACTAACTTGAAATAG	UACUAAC	UACUAAC	11	264		NA	NA	NA	No	YES	No	No	No	NA	NA
I	684094	684344	251	1	SPAC22F3.10c	SPAC22F3.10c.1:exon:1-SPAC22F3.10c.1:exon:2	int_114	331	200	130	1	0	92	2	3	A;A	UUAGCUAACUU;GUUAGCUAACU	15;16	306;25	dbr1_1;dbr1_2;wt_1	24	16	7.8998	7.80559	5	17	6.52054	6.12673	GTACGTGTCATTAGTAATGAACAGCTAGTGGGCATTTGACATCTGAGTGCATTGATTATTTCGAAAGCAAAATAGACGAGCTATTCAATAAATGCTTCATTTCTTTCGATCCTTCTTCACCTCTGATTTGGATGTTTTGTATTTTTTTAATATGTCAAATAGTTTTGCAGTTGTTTATACTGTGATTGTTCAACTTTATGAAATTGTTGAAATTTTTTACGATCGCTTGTTAGCTAACTTTTTATCTTTAG	AGCUAAC	AGCUAAC	15	306		NA	NA	NA	No	YES	No	No	No	NA	NA
I	1743125	1743298	174	-1	SPAC105.01c	SPAC105.01c.1:exon:3-SPAC105.01c.1:exon:2	int_1541	21	12	9	0	0	12	2	2	A;A	GUUGUUAACAG;AGUUGUUAACA	12;13	19;2	dbr1_1;dbr1_2	21	15	6.14686	5.92479	22	5.33333	3.29576	3.42582	GTAAGTGATATCGGAAGTAAGAAAGAAGCTTTTAAAAAGTTAATAGATGTTTTATAATTTCTCAGATTGGCACGATAAGAAAGTTGTCAATCAGGGCAGTATTTCTTATCACTCGAAAAAGAGAAGCTTCCTGTACCTACTTTTTGGTTTCTATAGTTGTTAACAGAACAACAG	UGUUAAC	UGUUAAC	12	19		NA	NA	NA	No	YES	No	No	No	NA	NA
II	1831299	1831627	329	1	SPBC9B6.10	SPBC9B6.10.1:exon:2-SPBC9B6.10.1:exon:3	int_2752	129	61	68	0	0	54	3	2	A;A;A	CAUGCUAACAA;UCAUGCUAACA;UGAUUGGAGUA	11;12;250	119;9;1	dbr1_1;dbr1_2	0	0	8.85156	8.59018	1	1	5.47858	5.61285	GTATGAAATATACGGTTTGGAGAGGAAATCGGCTCTGTAAGGACAATGGTTAAATACTCTACATGATGCCTTTGATTGGAGTACAATAAAAGAAGTCGAAATGAAATTTCATTAGTAGGATGGAATAAATTCAAAAATAAAATTCAGACTCATCTTTTTATCATTTTGAAGGACATGTTGGGTTCAAAAAGGCAATCATTAATTTGCAGTTTGTATATTTGATGCCAATTGGGTTCTTTTAGCTAATAAACAACCATTGTCAAAACATTCCTTTCTTTTCCTTCTTCATTTATTTTTCGTTTTGATAAATTCATGCTAACAACATTTAG	UGCUAAC	UGCUAAC	11	119	AUUGGAG	250	1	NA	No	YES	No	No	No	NA	NA
II	2690929	2691196	268	1	SPBC4F6.04	SPBC4F6.04.1:exon:1-SPBC4F6.04.1:exon:2	int_2939	478	290	184	2	2	68	4	4	A;A;A;A	CGUACUAAUUG;UCGUACUAAUU;AAUAGUGACCA;UCUAAAGAUAA	10;11;180;145	456;19;2;1	dbr1_1;dbr1_2;wt_1;wt_2	3908	4191	10.775	10.6114	12.5691	19.1416	9.44394	9.73391	GTAAGTTTACTTGTTTGCATCGTTTGCTATGCTTCGCTGTAGCTTTCCAAGAATTGTTAAGAATGGCGTGAAACCAGGCCGAATAGTGACCATTTTAAATGATTAGGGCAAGAGATTCTAAAGATAAAGTGAATAATTAGAACCTATTCCAATTGATTACTTGAAAATTCATTATAGGCTTGCAATTCTTATGCATACCGAAGTTTATAGAATATTAACGTGATTATAAAAAAATAAGTTAAATTTTTTTTCGTACTAATTGTTTTAG	UACUAAU	UACUAAU	10	456	UAGUGAC	180	2	NA	No	YES	No	No	No	NA	NA
II	259705	259804	100	-1	SPBC800.04c	SPBC800.04c.1:exon:2-SPBC800.04c.1:exon:1	int_3403	214	102	112	0	0	68	3	2	A;A;A	UUUACUAACUA;AUUUACUAACU;GCGAUUUACUA	12;13;16	193;18;3	dbr1_1;dbr1_2	2805	2614	8.28045	9.00786	175.375	174.333	12.1596	12.1904	GTAAGTATTGTTTAGCTGATACTTTGGTTTGGCACGCATAATATGCCTCCAGTATCATGCAAGTCGTACGATAAAGAGCGATTTACTAACTATGAAATAG	UACUAAC	UACUAAC	12	193	GAUUUAC	16	3	NA	No	YES	No	No	No	NA	NA
II	2293776	2293876	101	-1	SPBC16H5.04	SPBC16H5.04.1:exon:3-SPBC16H5.04.1:exon:2	int_3835	58	35	23	0	0	34	2	2	A;A	UUCUCUAACAA;AUUCUCUAACA	10;11	53;5	dbr1_1;dbr1_2	17	28	5.3897	5.46852	1.63636	5.8	4.45795	5.19455	GTACGTTGGTTTGGAAGATTGGTTGTTTCGTCTTTCTTAATAAAATGGGTAGATAAACGAATTCAATCTACCATGGTTCATCTATTCTCTAACAATTCTAG	CUCUAAC	CUCUAAC	10	53		NA	NA	NA	No	YES	No	No	No	NA	NA
III	1324148	1324354	207	1	SPCC1322.16	SPCC1322.16.1:exon:1-SPCC1322.16.1:exon:2	int_4639	258	152	106	0	0	93	2	2	A;A	UAUGUUAACCA;AUAUGUUAACC	15;16	232;26	dbr1_1;dbr1_2	26	27	8.50536	8.52648	5.4	5.6	6.48466	6.32713	GTAGGTTACAAGAATTAAAACGTTGAGCGTACATAACTAAAGGTGACTGTAAGAAACATTCATTTGGTTTTTATACCTACTGTGAATTAAGCTTTTAGTTGCAAAGTGATGAATTGTGTTTATGGATTCTACTCTTCTCGAATAGCTAAGCTTTGAGGGGTTTTTGTTGGTTGTATTACTAGAAATATGTTAACCATTTTTCTTTAG	UGUUAAC	UGUUAAC	15	232		NA	NA	NA	No	YES	No	No	No	NA	NA
II	2419432	2419532	101	-1	SPBC1921.07c	SPBC1921.07c.1:exon:2-SPBC1921.07c.1:exon:1	int_3867	15	8	7	0	0	9	2	2	A;A	UAUAUUAACAA;GUAUAUUAACA	12;13	14;1	dbr1_1;dbr1_2	67	53	4.36113	4.43535	11.3333	13.5	5.54144	5.43203	GTGAGTTTTCAAAAGCAAATATTGTCAGTCGCGAGTTCAAATTTACTTCTAAGCTTATATGTTGATAATATTTTTTTACCAGTATATTAACAAAACCATAG	UAUUAAC	UAUUAAC	12	14		NA	NA	NA	No	YES	No	No	No	NA	NA
I	2785685	2786012	328	-1	SPAC1805.07c	SPAC1805.07c.1:exon:2-SPAC1805.07c.1:exon:1	int_1784	20	11	9	0	0	15	2	2	A;A	AUCACUAACAA;AAUCACUAACA	10;11	18;2	dbr1_1;dbr1_2	1	1	6.67436	6.80959	1	2	3.19027	2.68458	GTATGTTCATTACGAGGAAAGTATATAAAAGAGCCTTGTCACCAATCTGTTTAAGTGCTATTCATGTGAACAAGTATAAATATCATTACATTGAGAAAAGCAAAGAAACAAGTGAATTGATTGGATCTGCAGGATTGCAAATAAAAGCAATCATTTGCCGACATGTCTCTAAATGAACTTCTACCTCTCAATAATTCACCTAAACGTAAAAAATATAATCTGTTTATTTATTTATTTTTTCTATTTTCACTACTACTCATACATGCTTGACGACTCTTTTTAATCCATTATAATAAATGTTTGACACTCAAATCACTAACAAAATCAG	CACUAAC	CACUAAC	10	18		NA	NA	NA	No	YES	No	No	No	NA	NA
II	2522625	2522792	168	-1	SPBC365.14c	SPBC365.14c.1:exon:3-SPBC365.14c.1:exon:2	int_3880	605	342	261	2	0	160	4	3	A;A;A;A	UUUGCUAACCA;UUUUGCUAACC;AGCACGCAUCU;UUUUGAGAUAU	17;18;103;28	460;140;3;2	dbr1_1;dbr1_2;wt_1	67	83	8.37656	8.46727	22.6667	42	4.85379	5.32028	GTACGTAGAGAGCTTGAAGATACAGAAGAGGATTAGTAATGTACATGTAAATGTTTTAAGCACGCATCTTTTGTGAATATAGCTTGCTGCTCTTTACTTTTATACAATTTCGTCCATATTCTATAAAGCTCTTTTTTGAGATATTTTGCTAACCACAATCTGCAATAG	UGCUAAC	UGCUAAC	17	460	CACGCAU	103	3	NA	No	YES	No	No	No	NA	NA
II	3713238	3713391	154	-1	SPBC19F5.05c	SPBC19F5.05c.1:exon:3-SPBC19F5.05c.1:exon:2	int_4197	876	487	386	2	1	98	4	4	A;A;A;A	UGUACUAAUAA;AUGUACUAAUA;AUUAUGUACUA;AACAUGGACGU	13;14;17;103	835;39;1;1	dbr1_1;dbr1_2;wt_1;wt_2	33	35	9.17007	9.37851	17	7.2	3.76543	3.97924	GTAAGTCTAATAGCATCAATTTTTACCGGAATCATAGCTATCTGAACATGGACGTTTGGTATAAAAAGCATTTTCCGAATGGTCAATTTTATCATGGGCTAGTCTTTTTTTGATGAACTAAAAGAATGAAATTATGTACTAATAAATATAATAG	UACUAAU	UACUAAU	13	835	CAUGGAC	103	1	NA	No	YES	No	No	No	NA	NA
I	1211985	1212204	220	-1	SPAC10F6.03c	SPAC10F6.03c.1:exon:2-SPAC10F6.03c.1:exon:1	int_1397	137	77	60	0	0	55	2	2	A;A	UUAACUAACAU;UUUAACUAACA	10;11	128;9	dbr1_1;dbr1_2	203	99	8.71501	8.47278	20.4	11.1111	8.06395	7.37651	GTATGTTTTTTGATGCTTTTATTGGACTCCATTTTAAATTTTTAACTGCCTTCTATTATTTTTGGGATCTATAGATTCCATGCACTTACTAGAGGTTTTTGTCATTTTCCGTTGACTCTAACTGTAGACAAGTGCTACATGAATAGTTAAACAGTTATTATTAATTGGAGCATATTTTTTATTTTGCTTCTTTCAAAAGATTTTTAACTAACATTTCTAG	AACUAAC	AACUAAC	10	128		NA	NA	NA	No	YES	No	No	No	NA	NA
I	4874703	4874825	123	1	SPAC4F10.20	SPAC4F10.20.1:exon:3-SPAC4F10.20.1:exon:4	int_1006	50	26	22	2	0	29	2	3	A;A	CAUACUAACCU;GCAUACUAACC	14;15	42;8	dbr1_1;dbr1_2;wt_1	551	421	6.18116	6.67315	55.2	46.8889	9.08383	8.99949	GTAAGTTTTTATTGCATCTGTTGTTTTGCTTGATGCTAGTTTAGATCTGTCTATAATATAATAGACCTTGAGTCTGTATAAAATGGATGGTATAAAAAAAAGCATACTAACCTCCTTGATTAG	UACUAAC	UACUAAC	14	42		NA	NA	NA	No	YES	No	No	No	NA	NA
III	887556	887641	86	-1	SPCC16A11.10c	SPCC16A11.10c.1:exon:3-SPCC16A11.10c.1:exon:2	int_5067	242	113	129	0	0	81	2	2	A;A	CACUCUAACAU;ACACUCUAACA	11;12	232;10	dbr1_1;dbr1_2	419	299	7.10909	7.3125	35	27.2727	9.55544	9.75049	GTATGTCATTTATTTTTTCTCTTCGTTCGCCATAGGCTCGTTAAAATTTTTGTAAAAATTTGCTTCGACACTCTAACATATTTTAG	CUCUAAC	CUCUAAC	11	232		NA	NA	NA	No	YES	No	No	No	NA	NA
I	1706569	1706690	122	-1	SPAC664.02c	SPAC664.02c.1:exon:4-SPAC664.02c.1:exon:3	int_1526	58	26	32	0	0	25	2	2	A;A	UGUGCUAAUUC;UUGUGCUAAUU	10;11	56;2	dbr1_1;dbr1_2	24	35	5.14519	5.21229	12.5	12	4.49966	5.27903	GTATGTACATCTCGAGAGAGACAATGAAGTAATTTGAAAATTGTGTTTGAAACTCATTCTTTACATATTTATCAACTATTAAATATGTGGAAGCAATCGAAGACTTGTGCTAATTCTTCTAG	UGCUAAU	UGCUAAU	10	56		NA	NA	NA	No	YES	No	No	No	NA	NA
II	2461226	2461356	131	-1	SPBC12C2.08	SPBC12C2.08.1:exon:2-SPBC12C2.08.1:exon:1	int_3872	6	3	3	0	0	5	2	2	A;A	GUUAUUAACUC;UGUUAUUAACU	17;18	4;2	dbr1_1;dbr1_2	8	9	3.34206	3.67827	9	10	3.79396	3.26027	GTAAGTACTGTTTATTAAAATTAATTTAGATAAAGAATCAACAGCTAAAAAATTATCAGAGGTGTTTTTTCCTCTGGATAAATTTTTCGTAATTTTGACAGTACATTGTTATTAACTCATTCGTATTTTAG	UAUUAAC	UAUUAAC	17	4		NA	NA	NA	No	YES	No	No	No	NA	NA
II	2240345	2240436	92	1	SPBC15C4.02	SPBC15C4.02.1:exon:2-SPBC15C4.02.1:exon:3	int_2824	169	107	62	0	0	64	4	2	A;A;A;A	UUUAUUAACUG;UUAACUGACAA;AUUUAUUAACU;UCCCGAGAAAU	11;7;12;21	112;51;5;1	dbr1_1;dbr1_2	16	7	8.46479	8.34586	1	0.5	5.86802	5.66877	GTATGTAAATAGATTTCATCTGTCCCCTTAAGCCAGGAATTCTGTCTGATTTATGTATTTTTTTTCCCGAGAAATTTATTAACTGACAACAG	AACUGAC	UAUUAAC	11	112	AACUGAC	7	51	NA	YES	No	No	No	No	NA	NA
II	480370	480578	209	-1	SPBC428.19c	SPBC428.19c.1:exon:2-SPBC428.19c.1:exon:1	int_3462	148	89	59	0	0	53	2	2	A;A	AUUGCUAAUGU;GAUUGCUAAUG	12;13	139;9	dbr1_1;dbr1_2	29	21	7.20922	6.94008	1.76471	3.66667	5.8937	5.79421	GTAAGTCTACATTACCAAAAGCTTTGAAAGATAGTTGCAATTAAAACGTTGATAAGCTGCACATGGAATTTTGTTAGTTTAGTTTAGCTGATTGAAGCTGTCATTTGCTAGTATATAGCTAAAAAAATACCATTTTTCCGGTGTTTGTCAACGCTTTAAACTTACTTTAGAGGTTTTCTTGTTGCCATTGATTGCTAATGTACTTTCAG	UGCUAAU	UGCUAAU	12	139		NA	NA	NA	No	YES	No	No	No	NA	NA
I	4950883	4951198	316	-1	SPAC1B3.12c	SPAC1B3.12c.1:exon:2-SPAC1B3.12c.1:exon:1	int_2269	23	15	8	0	0	15	2	2	A;A	CUUGCUAAUAC;GCUUGCUAAUA	9;10	18;5	dbr1_1;dbr1_2	151	100	8.06464	8.14897	38	25.25	7.08311	7.03714	GTAAGGAAACAAATTGCTATTTATAGGAGGTGGTTGAACGCGATTCACATTTTTTATGGATCGGTAGAAAAATTTCACAATTGCTTCGTGTATTGTATATAGTTTAAGATTAGCCTAAGTTGAAGCATTAGATTATAGTTTTTTTGGTATTAGATTTAGTTTAAAAATAGCCCCATTTTCGCTACTGATTCCAACGAGGACTGATCCACTTTTGGGGCGATTATACATATGTTTGTATATTACGAACGCTTATTTCTATTTGTTCAAAGAATTTCTATCTATTATTTTTTTAATTATTTGCTTGCTAATACAGCAG	UGCUAAU	UGCUAAU	9	18		NA	NA	NA	No	YES	No	No	No	NA	NA
II	2349096	2349218	123	-1	SPBC19G7.03c	SPBC19G7.03c.1:exon:3-SPBC19G7.03c.1:exon:2	int_3847	117	60	57	0	0	52	4	2	A;A;A;A	AUUGCUAACUU;AAUUGCUAACU;GUUAUUUAUAU;UUGAUUAAUUG	14;15;37;21	97;16;3;1	dbr1_1;dbr1_2	1162	877	7.77282	8.176	52.8636	46.2105	9.89684	9.79586	GTAAGTATTAAAATTTAATACAGTTGTTGAAATTCAATTCAGATTAGCGAGTACTTGATACGTTGATTGAAACATTCGTGTTATTTATATTATTGTTGATTAATTGCTAACTTAATTTTTCAG	UGCUAAC	UGCUAAC	14	97	UAUUUAU	37	3	NA	No	YES	No	No	No	NA	NA
I	5256844	5257012	169	1	SPAC14C4.14	SPAC14C4.14.1:exon:1-SPAC14C4.14.1:exon:2	int_1086	773	531	239	1	2	126	3	4	A;A;A	UUUACUAAUUG;GUUUACUAAUU;AUUGUUUACUA	11;12;15	638;132;3	dbr1_1;dbr1_2;wt_1;wt_2	97	73	10.2701	10.1498	4.26087	4.93333	7.46726	6.96456	GTATGTGTACTCTTTTTTGGAAGAATTCGAACTGCTAAATTGCATTGTTGAAAGGGGATGCAAACGGGTGTTGGAATCGTCTTATTTTCGGAAGTGAATTCTACATGTTTGTTTTCTTCTTATAATAGTCATGTCTATGCTTTAATGATTGTTTACTAATTGTCCCTAG	UACUAAU	UACUAAU	11	638	UGUUUAC	15	3	NA	No	YES	No	No	No	NA	NA
I	2643684	2643859	176	1	SPAC4F8.14c	SPAC4F8.14c.1:exon:1-SPAC4F8.14c.1:exon:2	int_562	437	250	185	0	2	57	2	3	A;A	GAUAUUAAUCG;UGAUAUUAAUC	18;19	424;13	dbr1_1;dbr1_2;wt_2	162	131	7.01934	6.98594	163	44	6.99998	6.94858	GTATGTTATAAATGAGTCGCTACTTTATTTCAAAACTTCTCCTCCAAATTATTTGCATGCATTACCTACATCTTTTTTCAATAGTACAAATTTACGCAAGCTTCAGAGGAAAGTAATAGAAATACTTTCTCATTAAATTCCTTCAGAACCTGATATTAATCGTTTTTACCCTATAG	ACCUGAU	UAUUAAU	18	424		NA	NA	NA	No	No	No	No	No	NA	NA
II	3219732	3219868	137	1	SPBC21.04	SPBC21.04.1:exon:1-SPBC21.04.1:exon:2	int_3086	61	32	29	0	0	18	2	2	A;A	CCUACUAAUAU;CCCUACUAAUA	14;15	60;1	dbr1_1;dbr1_2	35	26	5.52538	5.93559	12	13.5	4.22963	4.24298	GTATGTGCACAAATGAATGTTCTTAATTTTATTTTTTGAGGATAAAAGTGATAGCTCCATTATTCTAAGTTAAAGATATACGAAGAAAACGGATCTGTAATCATTTGTATTTCAACCCTACTAATATTTATACACAG	UACUAAU	UACUAAU	14	60		NA	NA	NA	No	YES	No	No	No	NA	NA
II	1891396	1891542	147	-1	SPBC3H7.01	SPBC3H7.01.1:exon:3-SPBC3H7.01.1:exon:2	int_3748	667	371	294	0	2	110	2	3	A;A	GGCGCUAAUUA;AGGCGCUAAUU	19;20	577;90	dbr1_1;dbr1_2;wt_2	163	126	8.69545	8.73675	7.80952	18.1429	5.94859	5.94711	GTATGTCAATTCGTGACTGTAAGTGAAGGATTACTTCATTATCTATCTATTTTACAGCATTATAAACTTTTTAGTATCCGGATTGTTAGCTAAAAAGATTATGTTTTACAATTGGACTATAGGCGCTAATTAGTTTGTCGAATTTAG	CGCUAAU	CGCUAAU	19	577		NA	NA	NA	No	YES	No	No	No	NA	NA
I	2156049	2156322	274	-1	SPAC23C11.13c	SPAC23C11.13c.1:exon:2-SPAC23C11.13c.1:exon:1	int_1627	67	42	25	0	0	28	2	2	A;A	UUUGCUAAUAU;AUUUGCUAAUA	9;10	63;4	dbr1_1;dbr1_2	136	73	9.1366	9.30989	27.4	5.69231	5.82501	5.45906	GTAAGTTGAACAAATAAAGAAGATAACAGGAAGAAGCGCTTCCTATAACGGCCTACTGCGTTAAAATTTGAATGGCAGCATCTTTGTGATTTCACAAATGATTGATTTTAACAATGCTTATCCACGATAAGGATTTTAAGGCTTTTATGTATGATCTTTTCAAAAGGACGCATCGTTTACCTGCATTTTCAATTGAGCCCAAGAATCCATCGTGGTGCATTCAAATTCCTTGCTCTTCTTATCTTCATATGGTTAACATTTGCTAATATAACAG	UGCUAAU	UGCUAAU	9	63		NA	NA	NA	No	YES	No	No	No	NA	NA
I	2440254	2440506	253	1	SPAC6B12.15	SPAC6B12.15.1:exon:2-SPAC6B12.15.1:exon:3	int_528	215	126	89	0	0	73	3	2	A;A;A	AAUGCUAACUC;UAAUGCUAACU;UUAAUUAAUGC	13;14;19	185;29;1	dbr1_1;dbr1_2	366	261	11.6269	11.6549	52.4286	131	11.0564	11.013	GTAAGTATTATTTTAGTGTATTATTGCAATACATAGTCATTAGATGTTTATGGTTATTGGCTCTGCAGTTTTTAGTCAAGCAAGGAATGATGTTTAGATTAATATTTGCTACTTCGGAGGCCTTACGGCTCGATGAGACAAAACAAATCACCATATGTTCTGACTTTTCCAATTGTTATTTTGATTTTGGCTCTGGCTATAACCATTTACAAATTTATTCATTCTAATTAATTAATGCTAACTCTCTTCAAAG	UGCUAAC	UGCUAAC	13	185	AAUUAAU	19	1	NA	No	YES	No	No	No	NA	NA
III	540377	540566	190	-1	SPCP31B10.08c	SPCP31B10.08c.1:exon:2-SPCP31B10.08c.1:exon:1	int_4976	761	484	276	1	0	136	3	3	A;A;A	UUUGCUAACUU;UUUUGCUAACU;CUAACUUAUCG	14;15;10	661;96;4	dbr1_1;dbr1_2;wt_1	1550	1984	9.35252	9.25036	310.2	496.25	9.87674	10.2652	GTAAGTGAAATTTATATTACAAGAAAAGCAAAGAGAAAAGGAGTTGATCATTGTCTGTACCGGTTGAAGTTTTTCCACTTTCATTTGATTGATTTTCAAACAAAATATATAATTTATTTTGTTATTTCTATAATTTTTCTTGTTTTTATGAGTTATTTCTTCGTTCTATTTTGCTAACTTATCGTTTTAG	UGCUAAC	UGCUAAC	14	661	AACUUAU	10	4	NA	YES	YES	No	No	No	NA	NA
III	63337	63435	99	1	SPCC757.08	SPCC757.08.1:exon:2-SPCC757.08.1:exon:3	int_4370	111	62	49	0	0	29	1	2	A	CAUACUAAUAA	10	111	dbr1_1;dbr1_2	6	6	6.23798	6.48089	3.5	2.33333	5.68776	5.7146	GTAAGAAATGATCTGTATTGTACTTTTACTTTTGTCAGCCGAAGGGTTGATTCAGTGGCTGTTTTTTTTTTCCACCTAACAACATACTAATAATCACAG	UACUAAU	UACUAAU	10	111		NA	NA	NA	No	YES	No	No	No	NA	NA
I	4066492	4066622	131	-1	SPAC19G12.17	SPAC19G12.17.1:exon:5-SPAC19G12.17.1:exon:4	int_2086	38	27	11	0	0	24	2	2	A;A	UAGACUGACGU;CAGCUUUACCG	14;40	37;1	dbr1_1;dbr1_2	19	18	7.8117	7.72927	2.85714	4.75	5.16398	5.37779	GTACGTACGATTTTTGTTTTTCTTTTTTGGTTGGAAATTTCAGTGACGATGAACTATGTTTTCCCAAGTCCCGGATTGAAAACTCAGCTTTACCGTATGAAAACTTGCATTAGACTGACGTTTATGTTTAG	GACUGAC	GACUGAC	14	37	GCUUUAC	40	1	NA	No	YES	No	No	No	NA	NA
III	2046701	2046784	84	-1	SPCC1739.09c	SPCC1739.09c.1:exon:6-SPCC1739.09c.1:exon:5	int_5268	118	75	43	0	0	51	3	2	A;A;A	UUUACUAAUGA;AUUUACUAAUG;GAAAUUUACUA	11;12;15	89;18;11	dbr1_1;dbr1_2	84	99	6.15309	6.29735	42.5	50	6.85432	7.00995	GTAAGATGAGAATGAGAGAGAAGAGAGGAAAGAAGGGAGAGATTATGTTTGTATGAGACAAGGAAATTTACTAATGATATACAG	UACUAAU	UACUAAU	11	89	AAUUUAC	15	11	NA	No	YES	No	No	No	NA	NA
III	1787430	1787610	181	1	SPCC1442.19	SPCC1442.19.1:exon:1-SPCC1442.19.1:exon:2	int_4725	9	8	1	0	0	7	1	2	A	AUUGCUAACGU	16	9	dbr1_1;dbr1_2	2	4	7.85721	8.18147	3	1.25	4.08538	3.57312	GTAAGTTTTGTTTATTCGTGTTAGAATCATCGATGTTGTCTATGTACTGGTACCTCAAACATTTTATGCTCAATTCATGTTTAATTCTCTCAAATAACTGCTTGATAATACTTTGTGTGAGGAAGCACTGATCTACGATTCCGTTTCATGCGTTGTTCATTGCTAACGTTTTAAATTCTAG	UGCUAAC	UGCUAAC	16	9		NA	NA	NA	No	YES	No	No	No	NA	NA
I	621853	621988	136	-1	SPAC1F3.04c	SPAC1F3.04c.1:exon:2-SPAC1F3.04c.1:exon:1	int_1246	18	14	4	0	0	14	2	2	A;A	GAUUUUAACGC;AGAUUUUAACG	9;10	17;1	dbr1_1;dbr1_2	20	10	7.47042	7.29064	1.75	1.83333	4.82879	4.67246	GTAAGTTGAGAACCGTTAGAAAGAAACCCGATCTTAAACTCTTGTCGAATGTTTGCTGTATACAGCGCAAGGGCACTAAGACTAATTATTAATATTTTTTTACCATTTTGCTATGTATCAGATTTTAACGCTGCAG	GACUAAU	UUUUAAC	9	17		NA	NA	NA	No	No	No	No	No	NA	NA
I	304536	304673	138	1	SPAC18B11.08c	SPAC18B11.08c.1:exon:1-SPAC18B11.08c.1:exon:2	int_18	9	4	5	0	0	7	1	2	A	UUUGCUAACCC	12	9	dbr1_1;dbr1_2	7	8	6.91442	6.95109	1.33333	2.25	6.94442	6.95862	GTAAAGTAGAAAGCACTTTCAAATTGAACCCAATCGTGAGTTACGCTGATTTAATCGCTCAAGCTTTAGTTCATTGTGGAATATTTTAAATCCTTTCTTTCGTCAAATAATTTATTAAGTTTGCTAACCCTATTATAG	UGCUAAC	UGCUAAC	12	9		NA	NA	NA	No	YES	No	No	No	NA	NA
I	2793253	2793352	100	-1	SPAC1805.11c	SPAC1805.11c.1:exon:2-SPAC1805.11c.1:exon:1	int_1785	131	69	62	0	0	74	1	2	A	UGAACUGACAC	12	131	dbr1_1;dbr1_2	1124	1031	8.85187	9.18457	62.5	93.8182	10.034	10.184	GTAAGTTCAACTTAAATGATTCACCATCTATAGTTAAATTGATGGGGAATCACTTAAATTATGAAATAGAAACGAAAACAATGAACTGACACATATTTAG	AACUGAC	AACUGAC	12	131		NA	NA	NA	No	YES	No	No	No	NA	NA
I	3693163	3693302	140	1	SPAC15A10.08	SPAC15A10.08.1:exon:2-SPAC15A10.08.1:exon:3	int_762	9	4	5	0	0	8	2	2	A;A	UAUACUAAAUA;UUGAUUUAUAC	12;18	8;1	dbr1_1;dbr1_2	50	34	5.83116	5.82342	51	35	5.74369	5.52725	GTAAGTAAAGTAAATTAGAAAATTTAAAGGACCTATAGTCAAATATAGATATGTTGTTATTTATGTGCCATTTTATTTTCGAATCTGTTGGATAAACTTGTCTCTCTTTCTTTTGTTGATTTATACTAAATATTTCATAG	UGUUGAU	UACUAAA	12	8	GAUUUAU	18	1	NA	No	No	No	No	No	YES	NA
II	3811993	3812141	149	-1	SPBC21C3.09c	SPBC21C3.09c.1:exon:2-SPBC21C3.09c.1:exon:1	int_4221	111	59	51	0	1	37	2	3	A;A	AAUACUAAUUU;GAAUACUAAUU	13;14	107;4	dbr1_1;dbr1_2;wt_2	29	13	6.82165	7.11702	7.5	7	3.79898	2.93033	GTACGTTGTTACAAGTTCAAGATTTATTGATGATTCGAAGATATGGTTACTTGGAATCAAAAAAGCTGAAGGTCCAAAACGTCACTGAATTGTCGAGGATCTTAAACTTTTATTTTACATTTGAAGTAGAATACTAATTTTATATTTAG	UACUAAU	UACUAAU	13	107		NA	NA	NA	No	YES	No	No	No	NA	NA
II	1707432	1707763	332	1	SPBC2F12.14c	SPBC2F12.14c.1:exon:1-SPBC2F12.14c.1:exon:2	int_2723	326	200	126	0	0	86	3	2	A;A;A	UUUACUAACCU;GUUUACUAACC;UUAGUUUACUA	8;9;12	287;37;2	dbr1_1;dbr1_2	145	127	9.8785	9.82705	20.8571	21.3333	7.85692	7.93229	GTAAGTAAATTGATTAAGAGAAAGAGAAGAATGAAATTTTGTTGAAAGAATTACATTCATAGATGGGTGGACTAGTGAGTCATTATTTATACTGACTCTTTCCTCTTTACTACTAATGAATGTTGCCTACTTTGTGATTTTTGTGGAGACTAAGCATGTACCGTTAATACCTTATGATGCTCTTTGATTAACTTTCGTTCTTCCGCAATGACTTAATTGTCATGGGGTCAACTTTTTTATTTTACTGAAGATATTGTATTGCATGCTTTTTCTTTCATCTTCTTCTTGATATCGTATTCCTTATATAAATATGTTAGTTTACTAACCTTTAG	UACUAAC	UACUAAC	8	287	AGUUUAC	12	2	NA	No	YES	No	No	No	NA	NA
III	2408070	2408224	155	-1	SPCP1E11.09c	SPCP1E11.09c.1:exon:2-SPCP1E11.09c.1:exon:1	int_5357	510	289	220	0	1	134	5	3	A;A;A;A;A	UUAGCUAACAA;AUUAGCUAACA;GUAAGUAAAAA;UCAAAUUAGCU;UCUUUCAAAUU	13;14;148;18;22	466;39;3;1;1	dbr1_1;dbr1_2;wt_2	229	160	9.45196	9.49118	10	5.55172	7.9806	8.1199	GTAAGTAAAAAAATATGGATTCGTTAACTGTTTGAGTCGCTGAGCGATTACAATGCCTTAATATTTTCTTAATGAAATTGAAAGATACTTTATTTAAACGCATCCGATCATCTTCAAAACATGTCTTCTTTCAAATTAGCTAACAAAACTTCTAG	AGCUAAC	AGCUAAC	13	466	AAGUAAA	148	3	NA	No	YES	No	No	No	NA	NA
I	5120334	5120440	107	1	SPAC29A4.14c	SPAC29A4.14c.1:exon:2-SPAC29A4.14c.1:exon:3	int_1067	30	20	10	0	0	20	2	2	A;A	AGUGCUAACAC;UAGUGCUAACA	14;15	28;2	dbr1_1;dbr1_2	68	53	5.71083	5.46499	6.27273	4.5	5.62935	5.53912	GTATGTGTTGATAGTGCGTTGGCGGTAAATGTTTGAATCCGATTGGCGTTAATATATATGTGTTTTATCTTTCATCTTAATTTTTTAGTGCTAACACTTCGAACTAG	UGCUAAC	UGCUAAC	14	28		NA	NA	NA	No	YES	No	No	No	NA	NA
II	2371244	2371350	107	-1	SPBC19G7.10c	SPBC19G7.10c.1:exon:3-SPBC19G7.10c.1:exon:2	int_3852	40	21	18	0	1	30	1	3	A	UUUUCUCACAA	10	40	dbr1_1;dbr1_2;wt_2	239	123	6.48577	6.70719	60	17.7143	7.02202	6.95115	GTATGTACCTTTGTGCTTGTGATTCTGTAATCATTCTCGGCTGTCATATCTGGGATATTGCAAGCTATTAGTATTTAATATTTTAATATTTTTTCTCACAATTCTAG	UUUUAAU	UUCUCAC	10	40		NA	NA	NA	No	No	No	No	No	NA	NA
II	676909	677056	148	1	SPBC947.03c	SPBC947.03c.1:exon:1-SPBC947.03c.1:exon:2	int_2461	264	157	107	0	0	47	2	2	A;A	AAAACUAAUAU;CAAAACUAAUA	15;16	252;12	dbr1_1;dbr1_2	29	13	7.12313	7.0277	3.75	7	4.7619	4.61483	GTAAGATTGATATGTGTTCATGAATAGCGCGTCCCTCAAATTCAAGTAAACTTTCGCTGGGTTACTGTTTAAATTGAAAACAAACGTTCCAGCTAGTACCTCTTTCTGTTTTTCACCAATTTCGTCAAAACTAATATAATGAAATCAG	AACUAAU	AACUAAU	15	252		NA	NA	NA	No	YES	No	No	No	NA	NA
III	416533	416615	83	-1	SPCC306.05c	SPCC306.05c.1:exon:3-SPCC306.05c.1:exon:2	int_4936	29	15	14	0	0	18	2	2	A;A	UCAGCUAACAA;AUCAGCUAACA	10;11	26;3	dbr1_1;dbr1_2	8	4	4.12973	3.81582	4.5	5	5.71132	5.6673	GTATGTTAGTTGTTATCCATCAACTGCCTACCAAAGGCTGCTCCAGTATTTTCAAACATTCGTTTATCAGCTAACAAATTTAG	AGCUAAC	AGCUAAC	10	26		NA	NA	NA	No	YES	No	No	No	NA	NA
I	2311572	2311693	122	-1	SPAC13G7.08c	SPAC13G7.08c.1:exon:2-SPAC13G7.08c.1:exon:1	int_1661	104	46	57	0	1	36	2	3	A;A	AAAACUAAUAC;UAAAACUAAUA	12;13	100;4	dbr1_1;dbr1_2;wt_2	8	13	4.85414	4.82402	3	4.66667	4.43831	3.94312	GTAGGTTCTCTCTGCACTGCATTAGTTGTACGCTTACTTCGTTTATAACAGCAGTTTTACAGCTAATTTCAAGCTAAAGTAGCTAAACACATTTTAAATGAGTAAAACTAATACAAGTGTAG	AACUAAU	AACUAAU	12	100		NA	NA	NA	No	YES	No	No	No	NA	NA
I	1353237	1353423	187	-1	SPAC19E9.01c	SPAC19E9.01c.1:exon:2-SPAC19E9.01c.1:exon:1	int_1429	648	387	261	0	0	71	3	2	A;A;A	UUUACUAAUUU;CUUUACUAAUU;UUUUUAAAUAU	15;16;47	614;33;1	dbr1_1;dbr1_2	47	30	9.47695	9.47465	3.69231	3.44444	6.18936	5.98673	GTAAGTAATTTCTTTGAAGAGTTTAAGGGACATTTGAAGACGGAGGATTAAAAAATTGTTTAGTATAATTGCTTTTTTACCTAATATCTATCTATATCCAAATTTGTTAGAGCTTCAGCCTAATCCCTATGAATTTTTAAATATTAGACATAAACTCTTAGAACCTTTACTAATTTTCTCTAAATAG	UACUAAU	UACUAAU	15	614	UUUAAAU	47	1	NA	No	YES	No	No	No	NA	NA
III	462816	462983	168	1	SPCC4G3.05c	SPCC4G3.05c.1:exon:1-SPCC4G3.05c.1:exon:2	int_4463	65	41	24	0	0	39	2	2	A;A	CGUGCUAAUAA;CCGUGCUAAUA	8;9	53;12	dbr1_1;dbr1_2	6	1	6.34949	6.16372	0.5	0.08	5.11245	5.14843	GTAGGAAATTTATTGGATTAGTGAAAAACTCTTTGAAAAATAAATAATTTAAATATTAAATTAATAATGACTGTAATTTTTCGAAAGCTTTTATAGCTTCGTACTCCATAAATATCATAACAATCACTGTTGTTGTTGTTTTAAATAAGAAACCGTGCTAATAATTAG	UGCUAAU	UGCUAAU	8	53		NA	NA	NA	No	YES	No	No	No	NA	NA
I	5428523	5429118	596	1	SPAC29B12.08	SPAC29B12.08.1:exon:1-SPAC29B12.08.1:exon:2	int_1129	265	175	90	0	0	75	3	2	A;A;A	CUUGCUAACUU;UCUUGCUAACU;UCCACUUACAU	12;13;243	242;22;1	dbr1_1;dbr1_2	2	0	11.33	11.3464	0.2	0.166667	3.55037	2.60723	GTAAGTAGTTTGTTGGTGTCGCCGCAGGGACTACAAGTTGCGCCATTTTGTGCGAGATGCTTGCGATGCGACGAGGAGCGAATAAGTACAGGGCTAGAGGTACGAGAAGGTGAATGGAATTGTGTGTTTGGATGTTTGGGTGTAGGTCGTCGTTGTGTGTCGTGCCTGCATGGACATTGGCTATTGTTGGGTATGTGGGGTTGCGACAATAAAACAGGATGGCAGTTTTCCAAAACATCCTCAACTGAGACATTCATTCAACAATGAAATTTTGTTTCTTTGTTTCTTTGTCTTTTTGGTTTGCTGTTTTGTTTGGAATATCTTTTTTTTCATCCACTTTGTCCAATCCACTTACATACAGGATACAAATGTCCTAAACAATAACCCGTCATGTATATC…	UGCUAAC	UGCUAAC	12	242	CACUUAC	243	1	NA	No	YES	No	No	No	NA	NA
I	3210103	3210317	215	1	SPAC1486.09	SPAC1486.09.1:exon:1-SPAC1486.09.1:exon:2	int_671	47	30	17	0	0	33	2	2	A;A	CUUUCUAACAA;GCUUUCUAACA	11;12	46;1	dbr1_1;dbr1_2	11	7	8.82696	8.47848	4	8	4.61737	4.75611	GTATGTTTTATTAAAAAGAAAGTTGTATAGTGGTTGAAGAAAGCAACCAGCTAGATTTTATTCTGTGCACAGTCATCTCTGAGAAGTGAAAGCAAGGTGGGTGAAAAAGCTTAATCATATTGGAATTTGATCGCTTTCTTACACCTGCTATTCTTTTCAACTACTTCCATCATAAATACTTTGATTCTTGGTAGCAGCTTTCTAACAAACTATAG	UUCUAAC	UUCUAAC	11	46		NA	NA	NA	No	YES	No	No	No	NA	NA
II	4387006	4387190	185	-1	SPBC1289.03c	SPBC1289.03c.1:exon:2-SPBC1289.03c.1:exon:1	int_4348	129	73	54	0	2	62	2	3	A;A	CAGUCUAACAU;ACAGUCUAACA	12;13	110;19	dbr1_1;dbr1_2;wt_2	104	89	9.95393	9.96683	105	45	7.47785	7.72217	GTACGTTTTATGATTTTACTTTATTAGAACAGTTTTTGTATACCGGAAACGATGCCTAGTATCGTAAATAAATGCCATCTTTTTATGAGACATACAGTTATCTGTACTCGTGCATCATCGGTTTTCAGTTACTCTTTTTATGCTTAGATCTTTCGTTTAGAAACAACAGTCTAACATATTTTTAG	GUCUAAC	GUCUAAC	12	110		NA	NA	NA	No	YES	No	No	No	NA	NA
I	564465	564552	88	1	SPAC2F7.15	SPAC2F7.15.1:exon:1-SPAC2F7.15.1:exon:2	int_88	12	7	5	0	0	10	1	2	A	UUCUCUGACAA	10	12	dbr1_1;dbr1_2	18	22	4.23798	4.49327	6.33333	4.6	4.49631	4.33214	GTAAGTTTACTGGGTAGTTTTACCTTAGGAATTCTATTTCACAATCACTTTAATATGCTTAATGTTCCATTTTCTCTGACAATTATAG	CUCUGAC	CUCUGAC	10	12		NA	NA	NA	No	YES	No	No	No	NA	NA
II	793321	793548	228	1	SPBC530.04	SPBC530.04.1:exon:1-SPBC530.04.1:exon:2	int_2501	45	24	21	0	0	35	2	2	A;A	UUUGCUAACAA;AUUUGCUAACA	67;68	40;5	dbr1_1;dbr1_2	25	19	7.10674	7.11053	5.2	20	5.54352	5.23519	GTATGCTAATTTTTTAAGAAGATCAGAGGTAGTTTCTCTTATTCTTTATGTAAGACATGAAAGTTGCACCTGTACGCAAATTGCAGCTGTTCAATTTGTTGAATGGAGCCTTTCTTTCCGAGTACTACCCTATCTTGCCTGTTTGAAATAATGATTTGCTAACAAGTGTTGCTTGGGCTGCCCCCTTTTCACTAGTTAAGGGTTCAGCTTGCTGGCATTAATGATTAG	UGCUAAC	UGCUAAC	67	40		NA	NA	NA	No	YES	No	No	No	NA	NA
II	433013	433203	191	1	SPBC582.08	SPBC582.08.1:exon:1-SPBC582.08.1:exon:2	int_2419	892	519	351	6	16	94	3	4	A;A;A	UUUUCUAAUUA;AUUUUCUAAUU;UAUCUUUACAC	12;13;24	824;63;5	dbr1_1;dbr1_2;wt_1;wt_2	185	138	9.97734	9.98165	31	17.375	7.32302	7.19316	GTAAGCATTTTAAGAAGAAAGAGTGAAGATCGTCGGACACAGAGACAATTCGCAGACTGTATTAAGAAATTTAGCAAAAATACTGCAACCCATTAAAGCTGCTAGGGTCTTGCTCGATAAAAAATGATTTTAGACTCCGCCATTCATTCTTTTTTCTTTTTATCTTTACACATTTTCTAATTATATTTTAG	UUCUAAU	UUCUAAU	12	824	UCUUUAC	24	5	NA	No	YES	No	No	No	NA	NA
I	4775068	4775163	96	-1	SPAC1782.12c	SPAC1782.12c.1:exon:1-SPAC1782.12c.1:three_prime_UTR:1	int_2216	15	9	6	0	0	11	2	2	A;A	UUAUCUAACAA;GUUAUCUAACA	12;13	13;2	dbr1_1;dbr1_2	0	0	2.79052	3.40427	0.5	0.25	3.82383	3.74802	GTAGGTTCTAGCACAAGTAATAGACTGGTATATAACCTTTATATACATTTACTTTTTGTTAAACAACCTATTTTACGTTATCTAACAATAAAAAAG	AUCUAAC	AUCUAAC	12	13		NA	NA	NA	No	YES	No	No	No	NA	NA
I	4991558	4991705	148	1	SPAC1952.13	SPAC1952.13.1:exon:2-SPAC1952.13.1:exon:3	int_1036	151	78	73	0	0	65	3	2	A;A;A	AUUACUAACAG;AAUUACUAACA;CACGAAAAUUA	15;16;22	142;8;1	dbr1_1;dbr1_2	35	32	8.40205	8.68426	7.2	6.6	4.99748	4.98718	GTATGTACAAAAGTAAACTGGGGCTGACTTGTCCGGTGGAAAACAGTTATGTGCAATATTTTAATGAATACGGTATCAGAATTCTGCACAACTACTTTCGGCTTTTAGTTTATCTCAATCACGAAAATTACTAACAGTCTTGCTTTAG	UACUAAC	UACUAAC	15	142	CGAAAAU	22	1	NA	No	YES	No	No	No	NA	YES
I	2348615	2348704	90	-1	SPAC17G8.04c	SPAC17G8.04c.1:exon:4-SPAC17G8.04c.1:exon:3	int_1668	211	101	110	0	0	47	2	2	A;A	GUCACUAAUAC;GGUCACUAAUA	14;15	207;4	dbr1_1;dbr1_2	73	66	6.65182	6.84078	18.5	13.4	5.43891	5.46902	GTAACTTTTAGTTTATTGCTTTTCCCAACGCTCTAGCATTGCTTATCTCATGCTTTACATTTTTATTCGGTCACTAATACGGTTTTGTAG	CACUAAU	CACUAAU	14	207		NA	NA	NA	No	YES	No	No	No	NA	NA
III	1366818	1366980	163	1	SPCC338.05c	SPCC338.05c.1:exon:2-SPCC338.05c.1:exon:3	int_4650	414	251	163	0	0	74	2	2	A;A	UGUACUAAUUU;UUGUACUAAUU	17;18	369;45	dbr1_1;dbr1_2	201	151	8.56495	8.60282	25.25	38	7.73228	7.7057	GTATGTTTCTATTGGGGTATATTTCAAGTGTTAAATTGATGTAAAAAAAATGACCGGGGACTAGCTTTGAAATTTATGAAGACTTTCGAATCAATACACTTTGAAGCTTATCCTGTTTTAATACTTTTAACTTTCAATTTGTACTAATTTGTTATTAATTTAG	UACUAAU	UACUAAU	17	369		NA	NA	NA	No	YES	No	No	No	NA	NA
I	3279540	3279682	143	-1	SPAC6G9.16c	SPAC6G9.16c.1:exon:3-SPAC6G9.16c.1:exon:2	int_1880	24	15	9	0	0	15	4	2	A;A;A;A	UAUGCUAACAA;AUAUGCUAACA;UUAAUUAAAUA;CUGAUUAAUUA	9;10;18;22	21;1;1;1	dbr1_1;dbr1_2	14	5	6.56876	6.5298	5	6	4.1601	4.59163	GTATGTTTATTGCAATACTGTAGTAGTTAATGAATTGCTGATTGTGTGATGACTTTCAAACCAAGGAATTTTTTTGTTCGTCGCATCTACCCCATTTTGCCAGTCGTTTTTGAGCTGATTAATTAAATATGCTAACAATTTAG	UGCUAAC	UGCUAAC	9	21	AAUUAAA	18	1	NA	No	YES	No	No	No	NA	YES
III	1816210	1816396	187	1	SPCC285.11	SPCC285.11.1:exon:1-SPCC285.11.1:exon:2	int_4732	525	309	215	0	1	129	2	3	A;A	UUUGCUAACUG;UUUUGCUAACU	16;17	457;68	dbr1_1;dbr1_2;wt_2	36	33	10.4988	10.1073	3.08333	5.66667	6.13581	5.79854	GTATGTGACACGGCAAGCATTCATTTTCAGTATTCGATAGTGATCAATTGCTTTGATTGAAAAATTCCAAGAAAGTTGTTATTTGCAACTGAACATTCATGGAATCCTCTGGTTGTCGTTTATTTTTCTAATCGAATTTTCGGTGAATGTTGGGACTGAGCCATTTTGCTAACTGTTTTATGATTAG	UGCUAAC	UGCUAAC	16	457		NA	NA	NA	No	YES	No	No	No	NA	NA
I	1418441	1418508	68	-1	SPAC20G8.09c	SPAC20G8.09c.1:exon:3-SPAC20G8.09c.1:exon:2	int_1445	10	3	7	0	0	7	1	2	A	UUUAUUAACCC	10	10	dbr1_1;dbr1_2	95	86	4.28802	4.70912	24	29	5.29688	5.36437	GTATGAGACCCAATGATGAAAACACCCAGCTTGTTTAGAAAGAATTAAACTTTTATTAACCCATATAG	UAUUAAC	UAUUAAC	10	10		NA	NA	NA	No	YES	No	No	No	NA	NA
II	2450506	2450710	205	-1	SPBC12C2.11	SPBC12C2.11.1:exon:3-SPBC12C2.11.1:exon:2	int_3870	135	84	51	0	0	60	5	2	A;A;A;A;A	UUUACUAAUUC;UUUUACUAAUU;UCAUUUUACUA;AAAACUCAUUU;UUUACUUAUUA	12;13;16;21;52	107;25;1;1;1	dbr1_1;dbr1_2	143	88	7.82271	7.85355	144	29.6667	5.91763	5.44912	GTAAATTAAAATCGTTTATATTGTTTTTAATATGTCAATTTCTGAAATGCTTAAGTTGTGGATTGCTTTCGATCACAGTGATTACGCTTTGTTTGTGATGTGTTCTCTCTCATGACATTTAATCTATCTGCTACTTCAATTTTCTGTTTACTTATTAAACAAAAGTATAAACAAATTAAAACTCATTTTACTAATTCAGGTTTAG	UACUAAU	UACUAAU	12	107	AUUUUAC	16	1	NA	No	YES	No	No	No	NA	NA
I	2444922	2445001	80	-1	SPAC32A11.04c	SPAC32A11.04c.1:exon:2-SPAC32A11.04c.1:exon:1	int_1696	4	3	1	0	0	3	1	2	A	AAAUCUAACAU	15	4	dbr1_1;dbr1_2	277	234	5.52929	5.32265	16.3529	21.3636	8.20382	8.25226	GTATGTTTTAATTTTACGAGAATTTTACATTCTTTTTGCTTTATTAAGAAAAAAAGAAAAATCTAACATGTCATTAATAG	AUCUAAC	AUCUAAC	15	4		NA	NA	NA	No	YES	No	No	No	NA	NA
II	3630092	3630171	80	1	SPBP8B7.32	SPBP8B7.32.1:five_prime_UTR:1-SPBP8B7.32.1:exon:1	int_3213	324	176	148	0	0	66	2	2	A;A	UCGUCUAAUCU;AUCGUCUAAUC	10;11	284;40	dbr1_1;dbr1_2	39	28	6.32968	6.48492	5.71429	4.83333	4.83977	4.43597	GTAAGGGTAGTGGATGTTTGCATGCTGATTTGGAAGGGCTGCGGATATCCATGAGAATAAGCATCGTCTAATCTTTATAG	GUCUAAU	GUCUAAU	10	284		NA	NA	NA	No	YES	No	No	No	NA	NA
III	595213	595492	280	1	SPCC1183.02	SPCC1183.02.1:exon:1-SPCC1183.02.1:exon:2	int_4494	39	28	11	0	0	29	4	2	A;A;A;A	UUGACUAAUUA;AAUAUUGACUA;CGUACUUAUUU;CAUGCUAAUAU	12;16;47;66	27;10;1;1	dbr1_1;dbr1_2	137	81	8.70819	8.40375	8.11765	7.45455	6.65049	6.4763	GTATGTAATTATAAATTTAATTTAAAAAAATTTTTGGCAATATAAGTCGGATGTCGTGTATTGGAATCTGTAGGATTTTACCGTGGTTTAATAAGTGGAGGGTTTTATAACGTTTTGCAAGTCTGTTTCCAATTGTGGCTTACTTCATATAAATGCCAAAACACTGTTTACAAATTATTAAAATTCGACATTTGATTTGAAATGTGACATGCTAATATTCGTTCACCGTACTTATTTTACGCATAACTTTTTAGGGTAATATTGACTAATTAATTACTAG	GACUAAU	GACUAAU	12	27	UAUUGAC	16	10	NA	No	YES	No	No	No	NA	NA
I	3485975	3486055	81	1	SPAC328.05	SPAC328.05.1:exon:5-SPAC328.05.1:exon:6	int_721	67	43	24	0	0	25	1	2	A	AUUACUGACUG	11	67	dbr1_1;dbr1_2	33	20	5.98983	5.55627	2.26667	1.75	4.63362	4.24859	GTATGTATATAAGGACGCTTTTGTGGGATTAGTTTTCCGCATCATTTTAAGTTTTTTTTGGAGATTACTGACTGAATATAG	UACUGAC	UACUGAC	11	67		NA	NA	NA	No	YES	No	No	No	NA	NA
III	755406	755468	63	1	SPCC1020.12c	SPCC1020.12c.1:exon:1-SPCC1020.12c.1:exon:2	int_4537	18	9	8	0	1	14	1	3	A	AUGACUGACAA	15	18	dbr1_1;dbr1_2;wt_2	6	2	3.98317	3.69002	1.75	0.6	3.02904	2.77653	GTAAGTGAAAAGAACGAGAAAAGCCCGATAGTATTCTAAATATGACTGACAATTCAATTTTAG	GACUGAC	GACUGAC	15	18		NA	NA	NA	No	YES	No	No	No	NA	NA
III	1927680	1927799	120	-1	SPCC74.02c	SPCC74.02c.1:exon:3-SPCC74.02c.1:exon:2	int_5248	30	14	16	0	0	17	1	2	A	UUUGCUAAUAU	13	30	dbr1_1;dbr1_2	2	4	4.05356	3.76041	3	5	4.39319	4.61285	GTATATTTTCTTTTGTTTATTCATTCTTTTTATTTTTATCTCTACTATACTGAGTTTTCCTATGTTCTCAATTTTTCTTTTTCTTTTTTGATTCGTTCAATTTGCTAATATTTATCTTAG	UGCUAAU	UGCUAAU	13	30		NA	NA	NA	No	YES	No	No	No	NA	NA
I	2377653	2377764	112	1	SPAC22H10.04	SPAC22H10.04.1:exon:2-SPAC22H10.04.1:exon:3	int_512	237	126	111	0	0	80	2	2	A;A	GUUGCUAACUA;CGUUGCUAACU	11;12	177;60	dbr1_1;dbr1_2	3	1	6.52813	7.39133	1	1	3.61806	3.42444	GTAAGTTAAAATGATGTTCATTAGAATCACATTAGCTGATTACTACAAATCATTAAAACTGAACATTGAGAACACAGCACATGCTTTATTATTCGTTGCTAACTATTTGAAG	UGCUAAC	UGCUAAC	11	177		NA	NA	NA	No	YES	No	No	No	NA	NA
II	2439551	2439645	95	1	SPBC21D10.05c	SPBC21D10.05c.1:exon:3-SPBC21D10.05c.1:exon:4	int_2893	7	6	1	0	0	5	2	2	A;A	GAUAUUAACGA;GGAUAUUAACG	19;20	6;1	dbr1_1;dbr1_2	3	5	2.89309	3.09744	2	3	3.71252	3.79788	GTAAGTGCTTCCCATCAGTTTTTGTAATATAGAGGCAAATTTCGTTTGTTTTTTAAATGGTTTTCCTTGGATATTAACGAGTTTTTTCTATTTAG	UAUUAAC	UAUUAAC	19	6		NA	NA	NA	No	YES	No	No	No	NA	NA
II	3874462	3874797	336	-1	SPNCRNA.445	SPNCRNA.445.1:exon:2-SPNCRNA.445.1:exon:1	int_4231	171	118	53	0	0	81	5	2	A;A;A;A;A	AUUACUAACUU;AAUUACUAACU;UGAACUAACUC;UAUAUUAACUA;CUGAACUAACU	173;174;217;10;218	130;27;7;5;2	dbr1_1;dbr1_2	12	10	11.2195	11.2164	3.25	2.2	3.96485	3.59956	GTATGTGCAAATTTTTTTTTTTTTAAATATGTTTTGAGTTGATGATGATCATTTCTGTTCCTAGTAGGGCATTCGATGCGGACACTTTTGTATTTTAGGAATTCTTCGTTGCTGAACTAACTCAATAATTTTGAAAGCCTAATTCGATTACTATTAATTACTAACTTCTTAGGTATGTTTATTGAGTCTGTGTTAAGATTGCTAAGATGATTATACTTTACCCCTTTCTGTTGGTGATAATCAATGATCCTCAGAAAACATGCATCACCGAATGAACATAGCACGTCTCAGCCATTAATTTCGTAATTATTAATGTTTTTATATTAACTAATTTAG	AACUAAU	UACUAAC	173	130	AACUAAC	217	7	NA	No	No	No	No	No	NA	NA
I	3499283	3499428	146	1	SPAC16E8.01	SPAC16E8.01.1:exon:1-SPAC16E8.01.1:exon:2	int_724	351	185	165	0	1	109	4	3	A;A;A;A	CUUGCUAACCA;GCUUGCUAACC;UUUGCUCAUUU;GAGAAAUAGAU	16;17;51;73	320;29;1;1	dbr1_1;dbr1_2;wt_2	28	5	8.28238	8.24235	9.66667	3	6.53942	5.92216	GTATGTGTAGAATAAATGACAGAGACCACGGTCTTCTACATGTTTGATGCGATAGGATACGTGAAGGAGAAATAGATCGAGTCTTGTCTTTGCTCATTTAGTAATAATGTTATTGTAAAGCCGCTTGCTAACCATTTTGTGTATAG	UGCUAAC	UGCUAAC	16	320	GAAAUAG	73	1	NA	No	YES	No	No	No	NA	YES
II	1537107	1537266	160	1	SPBC83.15	SPBC83.15.1:exon:2-SPBC83.15.1:exon:3	int_2691	219	145	74	0	0	76	3	2	A;A;A	CUGAUUAACUU;ACUGAUUAACU;AACACUGAUUA	15;16;19	195;23;1	dbr1_1;dbr1_2	112	107	7.84472	7.81705	10.2727	36	7.09905	7.05325	GTACGGAATTTTTGAGATTTCTGTGATAACGCATTATGAACTAAAAAGAAGCAACTTTATTGACGCTTGTTTCTTCGTTACTATTATCAAATGGATTGCGCGTTACTAGGATATCCTGTGTTTATATTTCGAAAAACACTGATTAACTTGTTAATTTTAG	CACUGAU	GAUUAAC	15	195	CACUGAU	19	1	NA	No	No	No	No	No	NA	NA
III	389219	389317	99	-1	SPCC1682.09c	SPCC1682.09c.1:exon:3-SPCC1682.09c.1:exon:2	int_4930	213	128	84	0	1	95	4	3	A;A;A;A	CUUACUAACUU;GCUUACUAACU;AUAGCUUACUA;AUUCAAGAUGU	9;10;13;26	149;50;13;1	dbr1_1;dbr1_2;wt_2	51	40	9.67094	9.77857	10.4	10.25	4.94319	5.0169	GTATGTATCTGTCGAATATTTGTTTAACTAAGCTGAAAGCTTATGTTTAAGATTGTTGAAAAGGGAATTCAAGATGTGTATAGCTTACTAACTTTTCAG	UACUAAC	UACUAAC	9	149	AGCUUAC	13	13	NA	No	YES	No	No	No	NA	NA
II	4189968	4190266	299	1	SPBC3F6.03	SPBC3F6.03.1:exon:1-SPBC3F6.03.1:exon:2	int_3318	109	57	52	0	0	53	2	2	A;A	UUUACUGACUU;UAAUUUUACUG	10;14	107;2	dbr1_1;dbr1_2	84	60	9.26457	9.23812	3.69565	10.1667	5.03771	5.01697	GTAAGTGAAACGAAAAACGTGCAGGAAATGTGACGGCGATGAAGTCGAACCCAACAAAAAAAAAATTATTACCTAAAAATAAAACTAATTCGGTGATGAATTTTTTTCTTTTTTTTTGTTGATTAGTAGGAAACTTTTTTATTTCCGAACTCACGTGTAAGATTGGGTTTCATCTGTTTTTTTATCATTGTTCGATAATGGTTATCTTGTGTTCTTTCAGCTTTTCTATCCTTCTCGCCTTACAACATTAACGTTTATCTTTTTTTGTTTTGTTTTTTTAATTTTACTGACTTCATTAG	UACUGAC	UACUGAC	10	107	AUUUUAC	14	2	NA	No	YES	No	No	No	NA	NA
II	1839710	1839846	137	1	SPBC28E12.03	SPBC28E12.03.1:exon:1-SPBC28E12.03.1:exon:2	int_2754	109	64	45	0	0	50	3	2	A;A;A	UUUACUAACUU;AUUUACUAACU;GGCAUUUACUA	13;14;17	96;10;3	dbr1_1;dbr1_2	21	8	7.90316	8.22211	0.956522	0.5625	3.70488	3.1354	GTATGTGAGGTTCAAAATTTAATCGCCGTGTCCGGAGAGCGGTCTTTTCACAAAACGAGACCCTGTCTTGAAATTGGACACTGCTCTTTTATTTTTTCCCAGCTGTAATGAACGGCATTTACTAACTTTTGCTCTAG	UACUAAC	UACUAAC	13	96	CAUUUAC	17	3	NA	No	YES	No	No	No	NA	NA
III	1790037	1790319	283	1	SPCC1442.12	SPCC1442.12.1:exon:2-SPCC1442.12.1:exon:3	int_4727	89	48	41	0	0	47	3	2	A;A;A	UAUACUAACAA;UUAUACUAACA;UCAUUAUACUA	9;10;13	84;4;1	dbr1_1;dbr1_2	21	16	7.14521	6.88239	2.75	5.66667	5.23175	5.13125	GTATGTATAACTTCTCAAATCTGTTCCGAGACTATTTTCACATTGGTTGCTTTGACATGATAAAAACACGAGGAACATGATAAGAGGCTTCTTTGGTTGAATTTTTTCTTCATTTTAGCTAAGTCGAGCTTTTTTTTTTTGCTTCTCGTTTTTTACATTATGTCGGTTTGTTCAATGAGTCTGAATTTTTCTCAATAAACATGCGATTGCGTATAATTCTTGATTATATATATTTTTTCTCTCTCTTATCCGGTCTTTTTATATCATTATACTAACAAAATAG	UACUAAC	UACUAAC	9	84	AUUAUAC	13	1	NA	No	YES	No	No	No	NA	NA
II	584936	585051	116	-1	SPBC354.14c	SPBC354.14c.1:exon:5-SPBC354.14c.1:exon:4	int_3488	6	3	3	0	0	5	1	2	A	UCAACUAACUA	13	6	dbr1_1;dbr1_2	6	3	5.63644	5.67968	7	0.5	4.6443	4.09961	GTAAGTTATACATTTGTCGCTAATTATTTGTTAATCTATTGAGCTTTGTTTTGAGCAAAAAGTTTCAATTAGTGGTTGTCTCATAATCTATGGATATCAACTAACTATGATACTAG	AACUAAC	AACUAAC	13	6		NA	NA	NA	No	YES	No	No	No	NA	NA
I	1215639	1215722	84	-1	SPAC10F6.05c	SPAC10F6.05c.1:exon:3-SPAC10F6.05c.1:exon:2	int_1398	44	26	18	0	0	28	2	2	A;A	UUUGCUAACUU;CUUUGCUAACU	13;14	37;7	dbr1_1;dbr1_2	22	22	5.75135	6.22918	7.66667	23	3.81019	3.95568	GTATGTTTCTTTTAAATTTCCTTCTGTAATCAATATGTGCATGAACTTTTGGCTGTTGCCATCCTTTGCTAACTTTGCGTACAG	UGCUAAC	UGCUAAC	13	37		NA	NA	NA	No	YES	No	No	No	NA	NA
III	1367107	1367284	178	1	SPCC338.05c	SPCC338.05c.1:exon:3-SPCC338.05c.1:exon:4	int_4651	22	15	7	0	0	12	2	2	A;A	CAUACUAACGU;UCAUACUAACG	11;12	21;1	dbr1_1;dbr1_2	46	29	7.78239	8.02446	15.6667	30	6.86988	6.96614	GTATGTGTATATTAGAGAAAGTTTGTAAAATACCTCATGTTCTCTGTAAATTCTTTTCATAGCAAATATCAGTATATTGTATGAAAATGAGAATTTGGTGTTGGCTTAACGAAGAGAAGCTAATTTTACGCGAAATAAAAAAATCAAGCTTTTTTCAGTTCATACTAACGTTAATTAG	UACUAAC	UACUAAC	11	21		NA	NA	NA	No	YES	No	No	No	NA	NA
II	3620273	3620424	152	-1	SPBC16D10.11c	SPBC16D10.11c.1:exon:2-SPBC16D10.11c.1:exon:1	int_4178	447	272	175	0	0	107	3	2	A;A;A	GAUAUUAACAU;UGAUAUUAACA;AUGUGAUAUUA	9;10;13	392;54;1	dbr1_1;dbr1_2	557	580	8.05088	8.18258	111.6	193.667	9.05105	9.36032	GTAAGTAAATATTATAATTTCTGTTTCAACACCTTTCCCTATTATTATTGCGTTTAAATTGCATTTTTATAGCAGCTTTTTTGGGCAAAGATACTCAAGTGTGAAATTATTAAAATAATTCGTTTTCCTCTGATGTGATATTAACATTATAG	CUCUGAU	UAUUAAC	9	392	GUGAUAU	13	1	NA	No	No	No	No	No	NA	NA
II	2575097	2575280	184	-1	SPBC29A10.16c	SPBC29A10.16c.1:exon:2-SPBC29A10.16c.1:exon:1	int_3887	135	74	61	0	0	54	3	2	A;A;A	UCCACUAACUA;GUCCACUAACU;CAUGUCCACUA	14;15;18	131;3;1	dbr1_1;dbr1_2	15	6	8.01683	8.12673	5.33333	2.33333	8.20278	8.15206	GTAAATAATTCGACAAAACTTTTGTAGAAGTAAACACCATATTATGTTGGAGACTGCTATGCTCAAAAGCGATAGTATACTTTTAATCGCTATCGTTTCATTCATCAGTTCTTCACTTGTGTGCCTTCTTGATTAAAACATTGTATACGGCTTTTTAAACATGTCCACTAACTATTTGTTTTAG	CACUAAC	CACUAAC	14	131	UGUCCAC	18	1	NA	No	YES	No	No	No	NA	NA
III	225173	225322	150	-1	SPCC548.05c	SPCC548.05c.1:exon:2-SPCC548.05c.1:exon:1	int_4902	144	94	50	0	0	45	2	2	A;A	GAAACUAAUAA;UGAAACUAAUA	8;9	136;8	dbr1_1;dbr1_2	1	3	4.00465	3.60841	1	2	3.82339	3.89443	GTAAGTGAAAATTTGATGCTTAACACTGGAATAACTTTTCATTATCATTGAATTCCCTCATTGTGAGTGAAATATTGAAAGAGCAAGATTATATCTTTAAAAGTTTCTAGATTTACTTTTTTTCTATAAAGGATTGAAACTAATAAATAG	AACUAAU	AACUAAU	8	136		NA	NA	NA	No	YES	No	No	No	NA	NA
III	994534	994708	175	-1	SPCC1795.03	SPCC1795.03.1:exon:2-SPCC1795.03.1:exon:1	int_5085	71	51	20	0	0	44	2	2	A;A	CAUGCUAAUGG;ACAUGCUAAUG	12;13	62;9	dbr1_1;dbr1_2	8	12	7.50924	7.27137	0.692308	1.08333	4.63255	4.70695	GTAAGTAGTCGCGGTTTTTTTAGGAAGTCTTGTGAATTTCTCTGGTTTGTGGAGTATATGGTCAATCTTCTTATAGAAACACGCATGTCTCCCACTTTTTTTTAGAAAAGCTTCGCTGTTTTTATGTAGAAATATATTTCTGTTTTTCCTATTGTACATGCTAATGGTTAAATAG	UGCUAAU	UGCUAAU	12	62		NA	NA	NA	No	YES	No	No	No	NA	NA
II	2405622	2405752	131	-1	SPBC1921.01c	SPBC1921.01c.1:exon:2-SPBC1921.01c.1:exon:1	int_3866	121	88	33	0	0	38	2	2	A;A	UUUACUAAUUA;CUUUACUAAUU	12;13	105;16	dbr1_1;dbr1_2	255	238	9.01625	9.11769	42.6667	39.8333	7.57265	7.47265	GTAAGTTTATTTTTGTAATTAAATTCTTGCGTTTCTTTGGAGAATATGAAGAAACGTTAATGCTATATTTTCACGGTCGTTTTTTGTTGGCTAAACGAATACATTCAAAACCTTTACTAATTACGTTTTAG	UACUAAU	UACUAAU	12	105		NA	NA	NA	No	YES	No	No	No	NA	NA
III	1747818	1747895	78	-1	SPCC1450.10c	SPCC1450.10c.1:exon:2-SPCC1450.10c.1:exon:1	int_5202	60	28	31	0	1	28	2	3	A;A	CCAACUAACAU;ACCAACUAACA	9;10	54;6	dbr1_1;dbr1_2;wt_2	11	10	4.64467	4.73945	12	11	3.146	3.03927	GTAAGATGCATTGGAAGAGCAGCAAGTATAACATCTGTCACATCTCTATTTTTTTTGTTCAACCAACTAACATGATAG	AACUAAC	AACUAAC	9	54		NA	NA	NA	No	YES	No	No	No	NA	NA
I	2708447	2708778	332	1	SPAPB2B4.02	SPAPB2B4.02.1:exon:1-SPAPB2B4.02.1:exon:2	int_576	37	17	20	0	0	27	2	2	A;A	UGUAUUAACAA;CUGUAUUAACA	15;16	35;2	dbr1_1;dbr1_2	93	42	9.54662	9.77507	13.4286	4.3	6.94216	6.95168	GTAAGTAATGTTTTAAACTGTATTTTTATTATTTGGTAGAGAGACGGTGAGGATTGAGGAGGTGTCATAGGAAATGTTAAAGATGATGAAGGAGGATTCTACAACTGTTTAATCACTCTAGTTGATATTAAAGATAAAAAAACCCTGTTATATTTTCGCTCTTTCTTCAAATGAACTTTCCCTTTTAAAGCATTGGATAAAAATCAACTATTAGTGTATCAGTGTCTTTAATTCGTCGTCTATATATGCCACATTGTTCTCTCCCTCATTTTTTCTCTCATATTTAATTATTTCTCCTTGTCAACATTTCTGTATTAACAATTTGTCTGTAG	UAUUAAC	UAUUAAC	15	35		NA	NA	NA	No	YES	No	No	No	NA	NA
I	5369783	5369973	191	-1	SPAC4D7.10c	SPAC4D7.10c.1:exon:2-SPAC4D7.10c.1:exon:1	int_2346	263	152	110	1	0	80	2	3	A;A	CUUGCUAACUG;CCUUGCUAACU	11;12	234;29	dbr1_1;dbr1_2;wt_1	74	76	10.1888	10.1886	37.5	77	4.85275	4.83153	GTAAGTAAAATTAATATGTTATTTGGATATTTTTGTATGATGACTATAATTTGCGATTGAGCGATGGTATTGCTCGGGATCTTGCCTGATTCCCATATGGGCTCCATCAGTATGCGACAAATAATCTTCTGATTGATTTCCATTACATCAACTGCTTTTGTTAATACGAATACCTTGCTAACTGTTTTAAG	UGCUAAC	UGCUAAC	11	234		NA	NA	NA	No	YES	No	No	No	NA	NA
I	4774261	4774366	106	1	SPAC1782.11	SPAC1782.11.1:exon:1-SPAC1782.11.1:exon:2	int_985	233	132	101	0	0	70	3	2	A;A;A	AAGGCUAACCG;UAAGGCUAACC;AUAGAUGACCC	11;12;31	217;15;1	dbr1_1;dbr1_2	162	136	5.46774	5.22478	27.1667	19.5714	7.41538	7.38499	GTAGGTAATTGTTACACATTAAAGATACTTTTTCCCCTCAGGAAATTCCATTTTCTCAATGTTTTTAAATAGATGACCCTATAAAATTAAGGCTAACCGGTTTTAG	GGCUAAC	GGCUAAC	11	217	AGAUGAC	31	1	NA	No	YES	No	No	No	NA	YES
I	4874290	4874383	94	1	SPAC4F10.20	SPAC4F10.20.1:exon:1-SPAC4F10.20.1:exon:2	int_1004	223	125	98	0	0	51	2	2	A;A	GGUACUAACAU;GGGUACUAACA	14;15	202;21	dbr1_1;dbr1_2	1460	1111	7.83212	8.03157	97.4	85.5385	9.53769	9.35794	GTACGTATCCGTTTGGCTAGAATCAGAGATTAACCACAATGTCGCTGAATTTTGGTAAAATGTTCTTTTACAGGGTACTAACATTTCTGTATAG	UACUAAC	UACUAAC	14	202		NA	NA	NA	No	YES	No	No	No	NA	NA
II	3327477	3327596	120	1	SPBC17D1.01	SPBC17D1.01.1:exon:2-SPBC17D1.01.1:exon:3	int_3127	67	34	33	0	0	36	2	2	A;A	UUUUCUGACUA;UUGAUGUAUAG	14;66	66;1	dbr1_1;dbr1_2	62	69	7.41988	7.40787	3.5	5.38462	7.37171	7.23457	GTATGATACTATCTTAACCAAGTTGGTAGAACTAGTAAATGATCCGTTTGATGTATAGTTATAATAAATTTATTTTTATTTTTATTTATTTAATGAAACTTTTCTGACTATTATATGAAG	UUCUGAC	UUCUGAC	14	66	GAUGUAU	66	1	NA	No	YES	No	No	No	NA	NA
I	289986	290186	201	1	SPAC1F5.03c	SPAC1F5.03c.1:exon:1-SPAC1F5.03c.1:exon:2	int_14	184	91	91	2	0	78	3	3	A;A;A	CUUACUAACAA;ACUUACUAACA;AUAACUUACUA	15;16;19	166;17;1	dbr1_1;dbr1_2;wt_1	74	65	8.24407	8.14939	7.5	5.5	5.11833	5.09698	GTATGTGACTTTAAAAATAGCTGGACTCATGATCTCTTTTATCTTAACTCATATATTGTTGATGTTGTTGATATTGACAAGAAGTTCATCAGCTTTATGACGGTGAAACTTCTTTCCTGCCATGCTCAGATGAGCTTTGCTTTGATTGCTATTTTACTTTACTGCCGCAATTTTCATAACTTACTAACAAATATTTTTCAG	UACUAAC	UACUAAC	15	166	AACUUAC	19	1	NA	No	YES	No	No	No	NA	NA
II	2933551	2933709	159	1	SPBC1703.10	SPBC1703.10.1:exon:4-SPBC1703.10.1:exon:5	int_2996	488	264	223	0	1	150	2	3	A;A	GAGGCUAAUGC;CGAGGCUAAUG	15;16	384;104	dbr1_1;dbr1_2;wt_2	108	91	8.53428	8.15693	10.9	7.07692	7.86038	8.13347	GTATGTAATGTGTGAAGTATGGAAAACCAATTTGATTGTCTTCCGTTTTCTGTATATGCGCGTATATGCGTTATAAGGCGTTTGGGGGATATTTTTATGGCGTTTTCTAGTCTTCACATTGTTTCCGACGCGGTTCCGAGGCTAATGCTTGCTTCTTAG	GGCUAAU	GGCUAAU	15	384		NA	NA	NA	No	YES	No	No	No	NA	NA
I	3528629	3528762	134	1	SPAC16E8.15	SPAC16E8.15.1:exon:2-SPAC16E8.15.1:exon:3	int_732	183	108	75	0	0	44	2	2	A;A	GCAGCUAAUAU;CGCAGCUAAUA	12;13	175;8	dbr1_1;dbr1_2	157	121	6.07758	6.04415	19.75	24.4	7.67916	7.67141	GTAGGTTTGATTGTTTTTAATGCTATGAGAAAAAGGTTTTTTGTAATATTTTTATTTTAAGTGAATACTAAAAACAGTTTTTTCACTCTTTTCTTTACTTTTTAATTTTTGGTTCGCAGCTAATATATCGCTAG	AGCUAAU	AGCUAAU	12	175		NA	NA	NA	No	YES	No	No	No	NA	NA
III	1446512	1446614	103	-1	SPCC61.04c	SPCC61.04c.1:exon:3-SPCC61.04c.1:exon:2	int_5147	137	62	75	0	0	56	2	2	A;A	AAUACUAACUG;UAAUACUAACU	15;16	125;12	dbr1_1;dbr1_2	13	16	5.98361	6.22873	0.933333	1.41667	4.11306	4.25933	GTACGTCAGTCGATCGATCTCTGATATATGGTAAAATGATTTTAGATAATCGTTACACAATTTCATGCTTTAGGAATTTTTAATACTAACTGTATCTTTTTAG	UACUAAC	UACUAAC	15	125		NA	NA	NA	No	YES	No	No	No	NA	NA
III	1855503	1855704	202	1	SPCC1223.08c	SPCC1223.08c.1:exon:1-SPCC1223.08c.1:exon:2	int_4743	79	41	38	0	0	31	2	2	A;A	UUUAUUAACUC;GUUUAUUAACU	17;18	78;1	dbr1_1;dbr1_2	44	64	9.74863	9.75602	4.5	65	5.29993	5.79406	GTAAGTGTAGAATGTTTTATATATAGAGGAAAACGACTTCAAATGTTAAATTTGACTTAAAACCCAGAATTGGGCAACTTTGGGTGAGAAGGTGCTAAGGAAGGACAAAAGTCGGTTGTGTCAAACTTCATTAGTCATTGAGTCTGTTTCTCTTCCATCTCTTTTTTTTAAAGAATTGTTTATTAACTCGTGTCCTATGTAG	UAUUAAC	UAUUAAC	17	78		NA	NA	NA	No	YES	No	No	No	NA	NA
I	786063	786160	98	-1	SPAC4G8.12c	SPAC4G8.12c.1:exon:4-SPAC4G8.12c.1:exon:3	int_1290	394	199	195	0	0	61	2	2	A;A	UUGACUAAUUU;CUUGACUAAUU	10;11	370;24	dbr1_1;dbr1_2	7	6	4.98959	4.72501	0.727273	3.5	4.17385	4.68806	GTATGTACATTGGCGAATATTAAGCTCTGATAAATTTGGAATTTATTTCAGAATTTACTACAAACCTTATTTCCTCCTTCCTTGACTAATTTTGGCAG	GACUAAU	GACUAAU	10	370		NA	NA	NA	No	YES	No	No	No	NA	NA
II	1785749	1785936	188	-1	SPBC18H10.08c	SPBC18H10.08c.1:five_prime_UTR:2-SPBC18H10.08c.1:exon:3	int_3729	40	27	13	0	0	30	2	2	A;A	AAUACUAACAU;GAAUACUAACA	14;15	31;9	dbr1_1;dbr1_2	0	0	6.69434	6.79921	0.5	1	-0.711955	-16.6096	GTATCGACATTGTACATAGTATTTTTTTTAATGCTCAAAACACGAAAATTTTGTATTCAAAGCTCCCTAGCCTTCTCGTCAGATAAATTTGATATAGTTGACGAGACTGTACTAATTATGATCTTTGAAGCAAACTTAATTTATTTTTTGTTCAAGTTACAATCTTGAATACTAACATGTCCTTTTAG	UACUAAC	UACUAAC	14	31		NA	NA	NA	No	YES	No	No	No	NA	NA
II	1839903	1840044	142	1	SPBC28E12.03	SPBC28E12.03.1:exon:2-SPBC28E12.03.1:exon:3	int_2755	117	68	48	0	1	38	2	3	A;A	UUUACUAAUUA;AUUUACUAAUU	18;19	113;4	dbr1_1;dbr1_2;wt_2	34	34	5.86236	5.61558	1.94444	2.33333	4.89006	5.2175	GTATGATTGAAAATGCAAACGTTGGGATTTTTGGATCTTTTTTTTTTCTTATAGATTGAATAAAAAAATATAAAATGCTCCAAAGATTACCCTTGTTTGTGCTTCTTGTTGTTTTGATTTACTAATTAAGACGGTTTGCTAG	UACUAAU	UACUAAU	18	113		NA	NA	NA	No	YES	No	No	No	NA	NA
II	2210363	2210811	449	1	SPBC14C8.04	SPBC14C8.04.1:exon:2-SPBC14C8.04.1:exon:3	int_2814	29	20	9	0	0	18	3	2	A;A;A	UUGACUAACGG;CUUGACUAACG;AACCUUGACUA	11;12;15	27;1;1	dbr1_1;dbr1_2	378	284	11.1723	11.11	42.1111	25.9091	9.08394	9.10567	GTAAGTTATTGAAGAAGTTTTCAATGAATACGTACTGTCAGTATACATGTGAGCGAAGTCAGTTGTAAAATAAGGCGGAAATGGAAGCGGATTATGTGATAATATCATGTTATTAAGGAATTTAAATTTGAATAGGAGATAAAGATTAATATGATTTTTTGTAATTTTTTTGGGCATCTTTGTGGATTTTCTTTGGAGATACGTTTTAATGAATGTGATGCTGAGTTAAGTAGCTTATGAGCTGCTGCTTAAACACTCGTTCATGATTATTCGATCATTAGTCTTTACTGTCTGGATTCCTTCTTAGCAAATTGTTTCCATTCTTATTTACACTGATTATTTCGTTGCTGATCGTGGTATGATCTGTATTCTGTTTATCCGCTACCTTCAAAATCGGGT…	GACUAAC	GACUAAC	11	27	CCUUGAC	15	1	NA	No	YES	No	No	No	NA	NA
I	2107368	2107881	514	1	SPAC631.02	SPAC631.02.1:five_prime_UTR:1-SPAC631.02.1:exon:1	int_439	132	71	61	0	0	56	4	2	A;A;A;A	AAUAUUAACUU;UAAUAUUAACU;GAUGUUAAUAU;UUUCCUAACAA	10;11;16;34	123;4;3;2	dbr1_1;dbr1_2	27	11	11.1878	10.9215	3.11111	12	3.94412	3.79536	GTAAGTAGTTTTGTTTGTGTTTATGACAGGTGAAGTGGGTGAGGCAGTGAGGGCAGTCCAACTCTTAATTTGGATTTTTTGCTGGTGATTTAGGATTTTGATATGGTTTGTCGAAGTTTGTTAGAATTGTCGCTTTTTTATCCTAAAGGTTAAAAAATTGGAATTGGTAGTCTCTTCATTGAAAGGAACTGACTTTAAAATTTTTTTTTTGTTTTGCCAAAGATACGTTTCTTTTCTGTGTTGCGACGCGTCTACCACCATTATATTGTAGACTGTGGAAAGGTGGTGCTATTGTTCCTCTTTTGTTAATATCTCGTGTTCCGTTTGACAATGTTACCTACGCCTTTTTTTATCGTAGTTCCTTTTATTTATATAACTAATGATGGCTTATGTCAGTAG…	UCCUAAC	UAUUAAC	10	123	UGUUAAU	16	3	NA	No	No	No	No	No	NA	NA
II	3218492	3218640	149	-1	SPBC21.03c	SPBC21.03c.1:five_prime_UTR:2-SPBC21.03c.1:exon:4	int_4050	12	9	3	0	0	11	1	2	A	UGUACUAACUA	12	12	dbr1_1;dbr1_2	1	1	6.16754	6.36699	1	2	2.03564	1.13481	GTAAGCATCACATTTTTATTACAAATATCTAGTAGACGAACTTTTTCGAATACGGAGAATTGTAATAGAGCTTTGAGCATGAATTCTATATCTATTATAATAGACAAGAATTATTCGTGGTATTTATAACTGTACTAACTATCTTGTAG	UACUAAC	UACUAAC	12	12		NA	NA	NA	No	YES	No	No	No	NA	NA
II	617969	618062	94	-1	SPBC839.09c	SPBC839.09c.1:exon:2-SPBC839.09c.1:exon:1	int_3498	202	105	96	0	1	62	2	3	A;A	UCUGCUAAUAC;GUCUGCUAAUA	19;20	175;27	dbr1_1;dbr1_2;wt_2	25	15	5.43561	6.0196	3.71429	8	3.70058	3.55182	GTACGAAGAAAATCCATTGAAGTTGCTATTGTCTTTCAAGAATATGATTTTCGATTGTTGGATTATTGTCTGCTAATACTTTATTGATATTTAG	UGCUAAU	UGCUAAU	19	175		NA	NA	NA	No	YES	No	No	No	NA	NA
I	3393029	3393124	96	-1	SPAC959.04c	SPAC959.04c.1:exon:3-SPAC959.04c.1:exon:2	int_1892	18	9	9	0	0	13	1	2	A	UUUGCUGACAU	12	18	dbr1_1;dbr1_2	16	10	4.18284	4.72619	17	11	4.75483	4.77692	GTAAGTAAATTGCTTCTTCAATTTTGGAAATGACTTTATTTAACCTGTTTCTAATATAAATGCTTCACGTTGTACTTTTTGCTGACATTTATTTAG	UGCUGAC	UGCUGAC	12	18		NA	NA	NA	No	YES	No	No	No	NA	NA
I	4305570	4305728	159	-1	SPAC25G10.05c	SPAC25G10.05c.1:exon:2-SPAC25G10.05c.1:exon:1	int_2123	30	19	11	0	0	24	2	2	A;A	CAUACUGACUC;GGAGAUUAAUG	14;58	27;3	dbr1_1;dbr1_2	266	173	8.61623	8.69092	267	87	7.85219	7.53543	GTAAGTGAAGCTTTTAAAGAAGCACAGTCTTGATTCCCTTTACATCTGTCCAAAATCAAGGATCTATAAAATTGATTGGACTTTAGATATTTCGGGAGATTAATGTGTCTTCATGCGTTTTGCCTTATAGTTATTATACATACTGACTCATATGCATAG	UACUGAC	UACUGAC	14	27	AGAUUAA	58	3	NA	No	YES	No	No	No	NA	YES
II	4239039	4239290	252	-1	SPBC16G5.14c	SPBC16G5.14c.1:exon:2-SPBC16G5.14c.1:exon:1	int_4310	302	210	90	2	0	101	5	3	A;A;A;A;A	AGUACUGACCA;CUUUCUAAAGU;UUUCUAAAGUA;CUAAAGUACUG;UCUUUCUAAAG	10;18;17;14;19	289;6;4;2;1	dbr1_1;dbr1_2;wt_1	1074	780	10.967	10.4677	33.5938	32.5417	10.111	9.88298	GTAAGTAATCTTTTATTAGAAAAAAAATCGATGTTTGTGTAGGGATATATATGATGATTTCCAATATCTGGCACCTCTTGTCTTATGGGATTCTTAAAAGTTTCTCGATGAACTTAACCTTTTGGAACTATATCTGATATCAACGTATATTGTTAAACGATAATAATGTAAAATTATATTTTTCTACGCATAAGATCTTTTTTCCTAATATCGTTCACTTTGTGCTTCTTTCTAAAGTACTGACCAATTTAG	UACUGAC	UACUGAC	10	289	UCUAAAG	17	4	NA	No	YES	No	No	No	NA	NA
I	2366265	2366380	116	-1	SPAC17G8.13c	SPAC17G8.13c.1:exon:2-SPAC17G8.13c.1:exon:1	int_1674	383	209	174	0	0	128	2	2	A;A	CGGACUAACAU;ACGGACUAACA	10;11	372;11	dbr1_1;dbr1_2	7	7	7.2556	7.20163	8	2	3.34306	3.08234	GTAAACAACTTTTCAAGTAAGATCATAATGTTATTCGCTATTGCTTGAGTTTAAACGAGGTGTACATTAAAAGATCATAATCTATCCAAATTGAATTTACGGACTAACATAATCAG	GACUAAC	GACUAAC	10	372		NA	NA	NA	No	YES	No	No	No	NA	NA
III	2144358	2144709	352	-1	SPCC1620.01c	SPCC1620.01c.1:exon:3-SPCC1620.01c.1:exon:2	int_5297	63	40	23	0	0	35	3	2	A;A;A	AUAACUAAUAA;UUUAUUCAUUU;UAUAACUAAUA	12;279;13	56;4;3	dbr1_1;dbr1_2	5	5	8.15804	7.97274	0.428571	0.230769	4.5857	4.20433	GTATGCTTTGCAAGTTATCGGGAATTGAAAGAGAAATAAATGATTTCTACGATCGGTAGGGTTCGGTTTATTCATTTTATTTAGGTTTTTGATTGATTTTTGAAAAAAGTCTTGTCCAAATCGATTATGTACAACATCTTACATGAGAGGAACATGAATCAATCAGCTTTCCCAACGTATATGCTACATTCTCAACTTTTAAAATCTAGGTTTTTCATTAATTGAACAATTTAAGACTGATCATAAAGTGCGCCTCACTTTCTGAATTCTTCGATCTATCCTTTTTTTTTCGTTCCTACTCTTAACACTATCTCGTGCTATTATTCCAGAGTTATAACTAATAATTTATTAG	AACUAAU	AACUAAU	12	56	UAUUCAU	279	4	NA	No	YES	No	No	No	NA	NA
I	3942670	3942774	105	-1	SPAC2F3.18c	SPAC2F3.18c.1:exon:2-SPAC2F3.18c.1:exon:1	int_2052	276	168	108	0	0	108	2	2	A;A	UAUUCUAACGA;UUAUUCUAACG	16;17	245;31	dbr1_1;dbr1_2	62	62	8.77368	8.91016	7.875	21	7.12384	7.09438	GTATGTAAACGCAACTTAATACGCTTGGGCTTGGACATGCTGAAATGACAAAAATTGGTTGCACGATTTTTTGTGAATTTCTTATTCTAACGACTTACGATTTAG	UUCUAAC	UUCUAAC	16	245		NA	NA	NA	No	YES	No	No	No	NA	NA
II	1822164	1822264	101	-1	SPBC9B6.05c	SPBC9B6.05c.1:exon:5-SPBC9B6.05c.1:exon:4	int_3737	98	56	42	0	0	27	2	2	A;A	AAUGCUAAUGA;AAAUGCUAAUG	11;12	96;2	dbr1_1;dbr1_2	120	94	6.09231	5.91598	20.1667	13.5714	6.12117	6.15688	GTACGTAGATTCTAAATATTACGCTCGAAAAGTTTGACCATGATTAAGCTTTCCTTTTCGAAACTGTTTTTCCTTTTTCGCCAAATGCTAATGAACTTTAG	UGCUAAU	UGCUAAU	11	96		NA	NA	NA	No	YES	No	No	No	NA	NA
III	1331792	1331985	194	1	SPCC132.03	SPCC132.03.1:exon:1-SPCC132.03.1:exon:2	int_4645	133	76	57	0	0	61	2	2	A;A	UUUACUAAUCA;AUUUACUAAUC	18;19	118;15	dbr1_1;dbr1_2	34	23	6.13752	5.84875	0.744681	0.631579	6.13198	5.88431	GTATGACAAAGATGCTGAAAAGAATTAAGGAAGGAGAAGCAAACTTGGCTGCATCCCTCCTTTTTTGCACAATTAAAAGTGGCGAATTTTGAGGTGAAAACATGTTAAATCTCTCAATTCGATTTACAAAGATCCCTTCGTTATGCAAAAACATTACAAAATAACCCAATTTACTAATCAACTATTTCTGTTAG	UACUAAU	UACUAAU	18	118		NA	NA	NA	No	YES	No	No	No	NA	NA
III	2126522	2126629	108	1	SPCC126.06	SPCC126.06.1:exon:3-SPCC126.06.1:exon:4	int_4792	384	208	176	0	0	76	2	2	A;A	UAUUUUAACAA;CUAUUUUAACA	12;13	379;5	dbr1_1;dbr1_2	42	59	7.18284	7.33448	4.77778	8.57143	6.12572	6.10084	GTAGGTAAACTGTATTGGGGTGGATGGATTTTTCATACTTCTTTACCGTGGCTCGTAGAATTTATAGCTTCTACTCTTTTATTTGCATCTATTTTAACAACTATGTAG	UUUUAAC	UUUUAAC	12	379		NA	NA	NA	No	YES	No	No	No	NA	NA
III	1484579	1485058	480	-1	SPCC188.06c	SPCC188.06c.1:exon:2-SPCC188.06c.1:exon:1	int_5157	23	17	6	0	0	16	2	2	A;A	UUUACUAAUAA;CUUUACUAAUA	14;15	20;3	dbr1_1;dbr1_2	28	14	7.01066	6.86501	29	15	4.57502	4.0474	GTATGTTTTATTCTATCGAAAATTTGTTCTCATACGGAGAGTGAGCCATGTCATTTATAAAAATATTTAATACATCTTTGCTTGATTTCTTCAAAAATTTTGCATTTGCCATGTTTTACACGCTGTATATGAACATCGTTTCATGCTTTACGAAATTTGTCGATAAGAAAAATCATCTACCACAGATATGCTTTTCTAGTTGCGTAGCTGGTTTATCCAATCTCTTATATATATATATCTTGATTGCATATTGGGATTATCTTCGTTTACATCGACGTTACCTTGACATGAAAATTTAAAACCCTTTTTAATAATGCAATGTTAGATTTTGGTTTCAAGTTACTAAAAGGGTTTACTTACCAAGCAACTTTTAGGCAGCTGAAGATTTTTTTAATGACC…	UACUAAU	UACUAAU	14	20		NA	NA	NA	No	YES	No	No	No	NA	NA
II	3786056	3786200	145	1	SPBC31F10.16	SPBC31F10.16.1:exon:2-SPBC31F10.16.1:exon:3	int_3251	98	55	43	0	0	53	2	2	A;A	AUUAUUAACCU;UAUUAUUAACC	12;13	83;15	dbr1_1;dbr1_2	10	9	8.2012	8.54132	1.22222	1.25	6.71772	6.62698	GTATGTCACTTTTTAAAGCAGCGAAAGCTGTAGTGTTAATGATGTTGGAGATTAGTGGGGAAAGGATCAAGACAAGTCTCTCTTTACCAAACTTTTCACTCCTATTGAAACGTTAACGTTTTACGTATTATTAACCTCGTCAAAG	UAUUAAC	UAUUAAC	12	83		NA	NA	NA	No	YES	No	No	No	NA	NA
I	4835704	4835921	218	-1	SPAC4F10.03c	SPAC4F10.03c.1:exon:2-SPAC4F10.03c.1:exon:1	int_2236	80	48	32	0	0	51	3	2	A;A;A	AAUACUAACUU;AAAUACUAACU;ACUAUUUAUUU	17;18;34	66;12;2	dbr1_1;dbr1_2	64	60	5.27973	5.44601	21.6667	61	4.26131	4.20983	GTATGTCTCGTGCGTTACTGAAACCTTGTAAATACTTAACTTTGTAGCGAAAAGTTTACGTTAATTTTATCGAAGTTATATCGTATATTAATGTGTAAACTTTAATGTTTCTCAGTCGCATATAGAAACATTTTAGTTTATTATTTCATTTTTTTTTTATTGCTAAATAATTATTTAACTATTTATTTTGTTAAAATACTAACTTTACACTTTTTTAG	UACUAAC	UACUAAC	17	66	UAUUUAU	34	2	NA	No	YES	No	No	No	NA	NA
III	1176998	1177128	131	1	SPCC4B3.02c	SPCC4B3.02c.1:exon:3-SPCC4B3.02c.1:exon:4	int_4619	100	53	47	0	0	32	2	2	A;A	AACACUAAUAC;UAACACUAAUA	12;13	97;3	dbr1_1;dbr1_2	1	1	5.69961	6.11769	1	0.25	-0.116353	0.175458	GTATGTTTAGTAAACAAACATCCTAAGTATATGAAGTGTCCTTAGACGTGAATTATTAACTTTCATTTCATTTCATTGACTCACATATATCAACTCTCTATTATTCCTGTATAACACTAATACGTATATAG	CACUAAU	CACUAAU	12	97		NA	NA	NA	No	YES	No	No	No	NA	NA
II	1416545	1416719	175	1	SPBC17A3.08	SPBC17A3.08.1:exon:2-SPBC17A3.08.1:exon:3	int_2651	10	7	3	0	0	7	1	2	A	CCUACUAAUAA	11	10	dbr1_1;dbr1_2	6	0	7.86238	7.52443	3.5	0.5	5.76993	5.37117	GTAAGTATATCTCACAATTCATTTCTTATTTTATTTTACTAGTATAAAAATTGCTTAAACTGTTTACTACTCAACTCATTCGCTTGTGGCATTTTTGTAAACTCTTGTCCTTTTCCTCAAAGTGTTGAAATGAGCCTAATCCAAATTTTTTTATCAGCCTACTAATAAATTACAG	UACUAAU	UACUAAU	11	10		NA	NA	NA	No	YES	No	No	No	NA	NA
II	2935313	2935430	118	1	SPBC1703.11	SPBC1703.11.1:exon:2-SPBC1703.11.1:exon:3	int_2998	67	31	36	0	0	35	2	2	A;A	CUUGCUAACAA;UCUUGCUAACA	11;12	61;6	dbr1_1;dbr1_2	5	7	6.43536	6.52612	1.5	2.66667	4.62629	4.59234	GTATGAAAATTAATACGATTTGACGTACTTCCTCTCCACAATGCTTAATACGGCACATTGTGAAGGAGCTACGAAATCCAACTTGTCACAATGTTCTTCTCTTGCTAACAATTTACAG	UGCUAAC	UGCUAAC	11	61		NA	NA	NA	No	YES	No	No	No	NA	NA
III	296267	296356	90	-1	SPCC553.06	SPCC553.06.1:exon:2-SPCC553.06.1:exon:1	int_4905	155	74	81	0	0	62	2	2	A;A	GAUUCUAACUC;AGAUUCUAACU	18;19	145;10	dbr1_1;dbr1_2	21	28	5.43822	5.17545	1.46667	1.70588	8.03807	8.08596	GTAGGTATATTGTTAGCGAAATACCGTTTTCGAAAACTAGTTCCAATCTATTCTATAAAACTGAAGATTCTAACTCTCTTATCTCTTTAG	UUCUAAC	UUCUAAC	18	145		NA	NA	NA	No	YES	No	No	No	NA	NA
I	5257073	5257341	269	1	SPAC14C4.14	SPAC14C4.14.1:exon:2-SPAC14C4.14.1:exon:3	int_1087	232	143	89	0	0	47	2	2	A;A	UUUGCUAAUCG;UUUUGCUAAUC	15;16	219;13	dbr1_1;dbr1_2	69	75	9.49847	9.49708	23.3333	25.3333	6.90322	6.96986	GTATGTCAACAAGTTGTGGTTTGAATGCTGTGAAAAGGAATAAGTGTAGTGATTTAGATTTCCCACCTACTCACTTGAGGAATGATGTTGACGAATATTCGATTTAACCTTGTGTTGGGTTTATAATAACCTCGTTTCTGTTTTATTCCAGCGATGCTTCATTACACTTTTGCAACGTTTCATCTATTACTACCTTAATATTTTTTTTCACAGCCATATCTTTCCGTGCCTATATGTAGCGCTTGCTTTTGCTAATCGATAATTTTTAG	UGCUAAU	UGCUAAU	15	219		NA	NA	NA	No	YES	No	No	No	NA	NA
I	3221621	3221794	174	-1	SPAC6G10.04c	SPAC6G10.04c.1:exon:4-SPAC6G10.04c.1:exon:3	int_1866	61	43	18	0	0	34	2	2	A;A	AAUAUUAACGC;GAAUAUUAACG	9;10	58;3	dbr1_1;dbr1_2	112	124	9.28569	9.16833	113	125	6.15648	6.50624	GTAAGGCATTTAATGGATGTAAGACAGTCATGCAAAAACCGTAATCTCTATGTGTGTTTGCTTTGGTTTTTGAAATTGCTATCGGTGGGAATACTTTTTTTGAGAGTATTACTAGGCATAATGATTTTGTATATTACAATTTACGTTTGTTATAATGGAATATTAACGCAACAG	UAUUAAC	UAUUAAC	9	58		NA	NA	NA	No	YES	No	No	No	NA	NA
I	3474632	3474714	83	-1	SPAC328.01c	SPAC328.01c.1:exon:2-SPAC328.01c.1:exon:1	int_1926	122	63	58	0	1	29	2	3	A;A	UUUGCUAAUUA;AUUUGCUAAUU	14;15	112;10	dbr1_1;dbr1_2;wt_2	33	30	5.50824	5.59604	4.85714	7.75	5.0693	4.84973	GTAAGTCGCGATGAGTCATAATGGAGATAGCCATGGTGCTTTGCGGAAACGGTCCATGAATATTTGCTAATTATCGTTTTTAG	UGCUAAU	UGCUAAU	14	112		NA	NA	NA	No	YES	No	No	No	NA	NA
III	339355	339482	128	-1	SPCC736.12c	SPCC736.12c.1:exon:2-SPCC736.12c.1:exon:1	int_4921	34	20	14	0	0	23	1	2	A	UUUACUAACCA	14	34	dbr1_1;dbr1_2	68	40	8.30178	8.32193	17.25	6.83333	5.39472	5.22949	GTAAGTAGATTATTGTTTAAAATATCAGAGAGGAATGTAAAATAGTGTCATTGAAAATTGACTGACTTTTCGCCTAAAACCTCCTACTGTTTAATTTTGTCGAGAATTTTACTAACCACCTTATATAG	UACUAAC	UACUAAC	14	34		NA	NA	NA	No	YES	No	No	No	NA	NA
I	3259054	3259183	130	-1	SPAC6G9.07c	SPAC6G9.07c.1:exon:3-SPAC6G9.07c.1:exon:2	int_1876	58	30	28	0	0	25	1	2	A	UUUACUGAUGC	18	58	dbr1_1;dbr1_2	46	32	6.53303	6.41972	6.71429	2.75	6.99786	7.21871	GTATGTCTTAGGCATCCGATGTTTCCGATTCGAACTGGTACATTCACTGATCTTTCGATTTGGAATAACGGAGTTTTGAAAGTCATTCTCATTATTTGGATTTTTTTTACTGATGCATTTATGAAATTAG	UACUGAU	UACUGAU	18	58		NA	NA	NA	No	YES	No	No	No	NA	NA
II	4360755	4360974	220	1	SPBC244.01c	SPBC244.01c.1:exon:1-SPBC244.01c.1:exon:2	int_3348	198	104	94	0	0	49	3	2	A;A;A	GUAACUAAUAU;UGUAACUAAUA;AAAUGUAACUA	11;12;15	193;3;2	dbr1_1;dbr1_2	19	15	7.33391	7.35151	4	8	2.49448	2.44418	GTAGGTAAAGTTTAATGTCAACTTGTATTGTGAACTTTTGAAAACACTGGGTAATTACACTCATGCCGTCTTCTTCCATCTGTAGATGAACTAAATGTTTTCTATTTTAAGAGGGAAATTGGTTTATGACATACATTTTGGCTTGAAGGGTATTCACCTGTAACGTCCATATACTTTTTCGAAAAGTCTGTCAACTGAAAATGTAACTAATATTATGTAG	AACUAAU	AACUAAU	11	193	AUGUAAC	15	2	NA	No	YES	No	No	No	NA	NA
I	3821034	3821187	154	-1	SPAC1F12.10c	SPAC1F12.10c.1:exon:2-SPAC1F12.10c.1:exon:1	int_2009	173	111	62	0	0	85	3	2	A;A;A	CUAACUAACGA;CCUAACUAACG;AGACCUAACUA	14;15;18	142;24;7	dbr1_1;dbr1_2	3	5	7.15582	7.1687	4	6	4.29207	4.79148	GTAAGTAAATTTTTGGAATGATGTGTTTGTTTTGTTTAAGTCGGCTTTTGAGCATTTGGCTTTCGAAATTCGAAATTGCCAAAGATCACTCATCATCATCTTTCATTTTACTATCTGAGCTTTCTTTAAAGACCTAACTAACGAACTGTTGAAG	AACUAAC	AACUAAC	14	142	ACCUAAC	18	7	NA	No	YES	No	No	No	NA	NA
I	5327830	5328100	271	-1	SPAP8A3.07c	SPAP8A3.07c.1:exon:2-SPAP8A3.07c.1:exon:1	int_2330	21	13	8	0	0	18	2	2	A;A	UUUGCUAACAU;AUUUGCUAACA	15;16	19;2	dbr1_1;dbr1_2	44	28	8.81592	8.89463	4.5	3.625	7.29613	7.38174	GTAAGTAACCCCAATTGGGCATCCAAAGAATTTTGCTAGTAAAAATTTTCATCAGTCGGAGAAACAGTACTGAAAGTTATCTTATTGAGTTATATAGTAGATTTTACTATGCGGATAACAAATTTGTTTTTGCTGATGAATTTTTAGGCAATTGAAATTTTAAATTTTTTTGTTTCTTTTTTTTGAAATTTTTATTGCTTTATGTTGATTGCTATGTCCAGCATGTTTGGTCTTTTTTTTTAATGTCAATTTGCTAACATTATTCAATTAG	UGCUAAC	UGCUAAC	15	19		NA	NA	NA	No	YES	No	No	No	NA	NA
II	817280	817415	136	-1	SPBC530.11c	SPBC530.11c.1:exon:2-SPBC530.11c.1:exon:1	int_3527	35	18	17	0	0	22	1	2	A	CAUACUGACCU	14	35	dbr1_1;dbr1_2	22	14	6.97802	7.18346	23	15	3.73608	3.41491	GTAAGTCAATACCGACTCGAACTGCTAATGTCGGCATATGGGGAGAAATACAAAATCCACCGATTTACTTTTCTTTCTTTTATTGATGATTTATATGCCTTTTTTTGTTTTTATTCATACTGACCTATTTGGATAG	UACUGAC	UACUGAC	14	35		NA	NA	NA	No	YES	No	No	No	NA	NA
I	5247924	5248130	207	1	SPAC14C4.11	SPAC14C4.11.1:exon:1-SPAC14C4.11.1:exon:2	int_1083	109	70	39	0	0	56	2	2	A;A	UUUGCUAACAU;GUUUGCUAACA	13;14	88;21	dbr1_1;dbr1_2	28	31	10.9694	11.0945	2.23077	8	6.21694	5.99834	GTAAGTAGCAAGCGAATATGTCTTAAATTTTGTATTACAAGGATTGTAATTAGGAGCTTAAATTAATAAGTAGCCTGAAATTATCACACATTTTATTTTGTTGCTCCTGTAGAATGCTGTTATCTAAAATTCCATGCTTGGTATAAATCCTTGTATTTTAAGAAAAATAAGCTTATCACGCTTAACGTTTGCTAACATTTTCTGTAG	UGCUAAC	UGCUAAC	13	88		NA	NA	NA	No	YES	No	No	No	NA	NA
II	4232201	4232297	97	1	SPBC16G5.10	SPBC16G5.10.1:exon:1-SPBC16G5.10.1:exon:2	int_3325	62	37	25	0	0	35	2	2	A;A	UAUGCUAACAC;GUAUGCUAACA	15;16	59;3	dbr1_1;dbr1_2	8	17	5.00439	4.97428	9	9	5.05024	5.40161	GTACGTGAGATATTTGGAGTTCGTATTAACATTGTTTGGCGTAACAAACAATATGAATCAATTGAAAAAAGCTGGTATGCTAACACTTTTTATGTAG	UGCUAAC	UGCUAAC	15	59		NA	NA	NA	No	YES	No	No	No	NA	NA
II	4180083	4180200	118	-1	SPBC14F5.11c	SPBC14F5.11c.1:exon:2-SPBC14F5.11c.1:exon:1	int_4296	7	4	3	0	0	7	2	2	A;A	AUUACUAACGG;GAUUACUAACG	11;12	6;1	dbr1_1;dbr1_2	60	42	8.00459	8.28649	12.2	14.3333	5.76015	5.51974	GTAAGTTAAGGAAATTGGTTGATAATGTATTAAGTCGAACTATTCATTGTAGAATCCTTGCTTCATTCTTCTCTTTTGTTTGGAAGTATTGAAATGTTTGATTACTAACGGTTTTTAG	UACUAAC	UACUAAC	11	6		NA	NA	NA	No	YES	No	No	No	NA	NA
I	1920202	1920606	405	-1	SPAC110.04c	SPAC110.04c.1:five_prime_UTR:2-SPAC110.04c.1:exon:1	int_1576	659	416	241	0	2	133	2	3	A;A	AUUACUAACUU;UAUUACUAACU	8;9	583;76	dbr1_1;dbr1_2;wt_2	195	198	9.83232	9.56131	32.6667	39.8	5.93629	5.95681	GTAAGTAATAGTTTGGAACTAAAATTTTTATACCCAAAAAAATTTGCTTTGGAAGAGATATGTCTAAAAATTGGCGATAAGTTAGTTAGAAAATTTCAAGAAGTCTATTTTGTATTTTTGTCACCAAGATATGGTTTCATTAATCAAAATCACTTTTGGTATTAGTTTCTTGTTTGCATTAACTTTACACCTGCTTGTTTGATTGAATTGAATGCATTCTCTATACTAAACCAAGTTTCATTCTATTAACTTTTTTGAAATTTTTTTACTTTTGTCTGTTAGTTTGATTTATTACGAAAGGTTTTTCTTTCGTTTTGAATGCCTTACTCTTCCATTGTTAAGTTTTTTGTTCGATTCTTTTATTTTTATTTTTTGTTTGTTGCGGAATTTATTACTAAC…	UACUAAC	UACUAAC	8	583		NA	NA	NA	No	YES	No	No	No	NA	NA
III	2285272	2285530	259	1	SPCC965.03	SPCC965.03.1:exon:2-SPCC965.03.1:exon:3	int_4857	17	10	7	0	0	15	3	2	A;A;A	UUAACUAAUGA;UCCGUUAACUA;GUUAACUAAUG	15;19;16	12;3;2	dbr1_1;dbr1_2	74	53	9.65387	9.34833	3.94737	6.75	5.89372	5.4989	GTAAGTGCCTGAATACGCCTAGTTATCTTGGACATCGAATTATTCATTTTGAATAAAAATAACCGTCATATGTAATTCATAAAAATTTGCAGCAATTCAAATTTTTGCTAAAAAATGTTCCCTTGGCACAATAGGTATTTGTCTGTTTCCTGGTCATTTACAAATCTACTGTGTATTATAGGTATTTTAGGATTCTACTCCTTGTTCAGACTAGGCATATTCGTTCGCATGAATCCGTTAACTAATGATATCTTGATAG	AACUAAU	AACUAAU	15	12	CGUUAAC	19	3	NA	No	YES	No	No	No	NA	NA
I	5073189	5073388	200	-1	SPAC1006.03c	SPAC1006.03c.1:exon:3-SPAC1006.03c.1:exon:2	int_2300	81	48	33	0	0	50	5	2	A;A;A;A;A	CUAACUAACAC;UUAUCUAACUA;UCUAACUAACA;GUGUCUUAUCU;UGAAUACAUUC	9;13;10;18;39	64;8;5;2;2	dbr1_1;dbr1_2	8	5	9.94291	9.7308	1.5	1.5	4.69268	3.73656	GTAAGCATGGCATTTGATTAAACCTGTCAGTGCAGCTTATTTATCTTTTCTACGGAGCTATTCTCCGCTAGTTATGCTGTTCTGTACGGTTTAACTCCAACTTTGGGATTACGAGAATGACAATTTGTAAAATTTCCTTTTTTTTTTTCGAACTTGAATACATTCAACCCATCAGGTGTCTTATCTAACTAACACACTAG	AACUAAC	AACUAAC	9	64	AUCUAAC	13	8	NA	No	YES	No	No	No	NA	NA
I	5383124	5383229	106	1	SPAC3G6.02	SPAC3G6.02.1:exon:1-SPAC3G6.02.1:exon:2	int_1122	251	135	114	0	2	65	2	3	A;A	UUUACUAACAU;GUUUACUAACA	13;14	227;24	dbr1_1;dbr1_2;wt_2	160	117	7.26227	7.37817	53.6667	39.3333	6.41396	6.34862	GTACGTTACAAATTATTTAGAGTGGCTTTCGAGTACTATTTATTCGATATGCTAATGTCTATGATTTTTTCGTTGGCCTAAAGACGTTTACTAACATAATGCTTAG	UACUAAC	UACUAAC	13	227		NA	NA	NA	No	YES	No	No	No	NA	NA
I	3505210	3505310	101	1	SPAC16E8.03	SPAC16E8.03.1:exon:1-SPAC16E8.03.1:exon:2	int_728	43	21	22	0	0	24	2	2	A;A	AUUACUAAUAU;UAUUACUAAUA	8;9	41;2	dbr1_1;dbr1_2	36	8	4.00268	4.53265	37	9	4.49863	3.81644	GTATGTCCACACTAATATGAGCTGTCCTGTTTGCAAGGCATTAATCCCTTGACAGACGCAGCATCTTTACCCTGTATTTTTTACCTATTACTAATATTTAG	UACUAAU	UACUAAU	8	41		NA	NA	NA	No	YES	No	No	No	NA	NA
III	528093	528189	97	1	SPCP31B10.04	SPCP31B10.04.1:exon:2-SPCP31B10.04.1:exon:3	int_4476	195	90	104	1	0	69	2	3	A;A	GUUGCUAACUA;UGUUGCUAACU	12;13	160;35	dbr1_1;dbr1_2;wt_1	25	18	5.26743	5.69674	5.2	3.8	6.07398	6.18903	GTTCGTTTGTAGAGGAGCGGGAATTCAGCATTACTTCTTGCGGATAGATTTTCTGCTTCTAAAAGCGTTCACTTAATTGTTGCTAACTATTTTTCAG	UGCUAAC	UGCUAAC	12	160		NA	NA	NA	No	YES	No	No	No	NA	NA
III	1176873	1176952	80	1	SPCC4B3.02c	SPCC4B3.02c.1:exon:2-SPCC4B3.02c.1:exon:3	int_4618	39	23	16	0	0	28	2	2	A;A	AAUGCUAACAU;UAAUGCUAACA	9;10	32;7	dbr1_1;dbr1_2	27	13	3.37549	3.73769	2.8	1.75	4.99082	4.28264	GTAAACATGAATTCTCTTTCGCTACCAAGTGAAATGGATCATCAAATTGACAGAATAAAGTCATAATGCTAACATTTTAG	UGCUAAC	UGCUAAC	9	32		NA	NA	NA	No	YES	No	No	No	NA	NA
I	501249	501365	117	-1	SPAC227.19c	SPAC227.19c.1:exon:2-SPAC227.19c.1:exon:1	int_1222	28	14	14	0	0	16	2	2	A;A	GGUUCUAAUAU;UGGUUCUAAUA	13;14	26;2	dbr1_1;dbr1_2	5	4	5.75305	6.09155	2	5	4.19652	4.40426	GTAAGTTATGATGCTAAAATCTCAATGGCATCGTCGAATATTTTCTGCCAGGGTCATTGTACCAATATGTTTTAATTTCTCTATCTTGTACAAATTTGGTTCTAATATTTTTAACAG	UUCUAAU	UUCUAAU	13	26		NA	NA	NA	No	YES	No	No	No	NA	NA
I	2472750	2472860	111	-1	SPAC19A8.16	SPAC19A8.16.1:exon:2-SPAC19A8.16.1:exon:1	int_1700	5	3	2	0	0	3	2	2	A;A	AGUAUUAACAA;AAGUAUUAACA	14;15	3;2	dbr1_1;dbr1_2	4	4	3.79052	4.33231	0.714286	1	3.0392	2.00909	GTAAGTAGGAATTTTTGATTCAGGCATGTCAGTTAAGTACACTGTATTTTGTGTACCGAATTGTGTCTTGAAGTTTTTCGACTGTGATTAAGTATTAACAAATGGTTTAAG	UAUUAAC	UAUUAAC	14	3		NA	NA	NA	No	YES	No	No	No	NA	NA
I	1632210	1632361	152	1	SPAP27G11.12	SPAP27G11.12.1:exon:2-SPAP27G11.12.1:exon:3	int_353	68	45	23	0	0	50	2	2	A;A	UGUACUAACCA;GUGUACUAACC	10;11	56;12	dbr1_1;dbr1_2	53	35	5.92197	6.11286	10.8	7.2	5.78211	5.59859	GTAGGTAATATTTTTCTTTTGGTTGGTTTCATAATTCAGTGAATGCCAGAGAATACGAAGTTCAATTCTTAGGATTCTCTGCTAATGAATGTGAATTCAATTTGAATATAATCATAAATAATTGAAAATTTCAAGTGTACTAACCAATTCAG	UACUAAC	UACUAAC	10	56		NA	NA	NA	No	YES	No	No	No	NA	NA
I	1977450	1977555	106	1	SPAC9G1.05	SPAC9G1.05.1:exon:4-SPAC9G1.05.1:exon:5	int_420	33	17	16	0	0	17	3	2	A;A;A	CUUGCUAAUCU;UAAUCUUACUU;UCUUGCUAAUC	16;11;17	29;2;2	dbr1_1;dbr1_2	173	137	5.27692	5.53929	87	19.7143	7.36762	7.30361	GTAAGTGATTTCTATTGTTTTCGAAGGATGTGTTAAATTATTGGATTTACTCATAATTTCAAAAATTCCAATATTTGTTGACTCTTGCTAATCTTACTTTTAACAG	UGCUAAU	UGCUAAU	16	29	AUCUUAC	11	2	NA	YES	YES	No	No	No	NA	NA
II	967790	967865	76	1	SPBP35G2.02	SPBP35G2.02.1:exon:1-SPBP35G2.02.1:three_prime_UTR:2	int_2525	1	0	1	0	0	1	1	1	A	UUGACUGAUCG	10	1	dbr1_2	0	0	3.51988	1.41938	0.2	0.333333	4.48885	4.30589	GTAAGTCAAAGTCTCGTCGTAGTTTAGTTCGCAAACTGGGTATTGCATAGTTTATCACTTTGACTGATCGTCTTAG	GACUGAU	GACUGAU	10	1		NA	NA	NA	No	YES	No	No	No	NA	NA
III	1861727	1861828	102	-1	SPCC1223.10c	SPCC1223.10c.1:exon:2-SPCC1223.10c.1:exon:1	int_5237	169	87	81	0	1	41	1	3	A	AAUACUUAUUU	19	169	dbr1_1;dbr1_2;wt_2	29	30	7.02499	7.28028	30	31	4.7399	4.97924	GTACGTTGCCCATTTATTTTTAGAGACAGTGTATATCTCTGTTGCAAACTATGAACATCATACTTTCTCCAGGCAGAATACTTATTTCTTTTTTGTTTATAG	UAUGAAC	UACUUAU	19	169		NA	NA	NA	No	No	No	No	YES	NA	NA
II	765170	765270	101	1	SPBC577.07	SPBC577.07.1:exon:2-SPBC577.07.1:exon:3	int_2489	12	7	5	0	0	10	1	2	A	AGUUCUAACAC	10	12	dbr1_1;dbr1_2	1	0	5.09231	4.29449	0.666667	0.5	3.31873	3.42044	GTAAGTATCGTGGGGAATTGTTTTGTTTTCTTTTATAAAGCTTACTATGAAAAAGTGATAGGATTCATTTTATTTAATGGTTTAAGTTCTAACACTTGTAG	UUCUAAC	UUCUAAC	10	12		NA	NA	NA	No	YES	No	No	No	NA	NA
I	2557849	2557937	89	-1	SPAC4A8.07c	SPAC4A8.07c.1:exon:3-SPAC4A8.07c.1:exon:2	int_1717	36	17	19	0	0	30	2	2	A;A	AAAACUAACCA;AAAAACUAACC	12;13	30;6	dbr1_1;dbr1_2	41	40	2.35919	2.5135	42	41	4.82588	4.78362	GTTCGTTCTCTGTTTTCATTACATGTGTATATAATATGTATTAATTATTATTTATTACGATTTTTTTTAAAAAACTAACCACCTGAAAG	AACUAAC	AACUAAC	12	30		NA	NA	NA	No	YES	No	No	No	NA	NA
I	311181	311298	118	-1	SPAC18B11.04	SPAC18B11.04.1:exon:3-SPAC18B11.04.1:exon:2	int_1178	93	49	44	0	0	54	2	2	A;A	GAAUCUAACAA;UGAAUCUAACA	12;13	75;18	dbr1_1;dbr1_2	8	4	5.56966	5.61755	0.6	0.333333	3.33109	2.62291	GTATGACAGCTATCCTAAAAAAATTGATTTTACATCCGCATCATGGTTCTGCAATTTGAATAAGATTCTTAATTGCTGCTAAATTGAATGTTTAACGCTGAATCTAACAAGTATGCAG	AUCUAAC	AUCUAAC	12	75		NA	NA	NA	No	YES	No	No	No	NA	NA
II	3430494	3430580	87	1	SPBC4B4.09	SPBC4B4.09.1:exon:4-SPBC4B4.09.1:exon:5	int_3163	91	38	53	0	0	52	2	2	A;A	AAGGCUAACGU;AAAGGCUAACG	9;10	73;18	dbr1_1;dbr1_2	8	10	3.7399	4.39428	3	11	5.56813	5.47465	GTACGGACAAATTACCATTAACATTCGTAATTGTCTCAATTAATTTTGTGATCAAATTCAATTTAAGCTCAAAGGCTAACGTCGTAG	GGCUAAC	GGCUAAC	9	73		NA	NA	NA	No	YES	No	No	No	NA	NA
I	1696690	1696831	142	1	SPAC824.07	SPAC824.07.1:exon:1-SPAC824.07.1:exon:2	int_372	75	46	29	0	0	51	4	2	A;A;A;A	CAAACUAACAU;CCAAACUAACA;UUAAUUAACCA;AACAUUGACAA	17;18;26;11	62;10;2;1	dbr1_1;dbr1_2	34	44	7.28102	7.33133	3.88889	5	5.10381	5.69397	GTAAGTGAAGAGAATGAAATAACGACTTAAATACTGTTATCTGTGATTTCGGAAACATGATTTTCTCCTCCTGTTTTCCGAATTGTTTTGTTTGTGCGCTCCGTAACATTTAATTAACCAAACTAACATTGACAAACTCTAG	AACUAAC	AACUAAC	17	62	AAUUAAC	26	2	NA	No	YES	No	No	No	NA	NA
II	4283956	4284223	268	1	SPBC16A3.08c	SPBC16A3.08c.1:exon:1-SPBC16A3.08c.1:exon:2	int_3337	342	208	134	0	0	119	2	2	A;A	AGUAGUAACCA;AAGUAGUAACC	12;13	216;126	dbr1_1;dbr1_2	610	433	11.2159	11.1033	50.9167	144.667	8.36871	8.16874	GTATGATTTAAACATTTTATCATTAAACGATTATTTTAAGGGTTAGGAAATGAACGAACTGGTAATTATTTGTAGCATGTTTTAGGGCTGTGTTTAAGGTTTCATTACTGCGACCCGAATGAAATACTTTATAGAAGTATAGCCTGTATAAAGACGCTCAAGTATTAAAAAATATAAATTCACATTTCGTTCATTATTCTTTAGAGTGTTAGCTCTGCAGACTCTGCTGATTTTTATTTTGTTTTCGCAAGTAGTAACCAAATTATAG	UGCUGAU	UAGUAAC	12	216		NA	NA	NA	No	No	No	No	No	YES	NA
II	3058061	3058217	157	-1	SPBC13E7.10c	SPBC13E7.10c.1:exon:2-SPBC13E7.10c.1:exon:1	int_4013	15	8	7	0	0	9	2	2	A;A	AUAUCUAACAC;UAUAUCUAACA	12;13	13;2	dbr1_1;dbr1_2	13	11	5.43842	5.34996	2.33333	4	3.87723	4.13252	GTAAGTTAGAAGGCAATCATCCAGCAATGCGGTGTTTTACAGTTCTGATGCAGTCACCTTTTTTTGTTCAGTCTGTGTTAAATTTTGGTTTGATCTTTTACTAATAGACACCTCTTCGTCCATATTTTTCATCGACTTATATCTAACACAGCTTTAG	AUCUAAC	AUCUAAC	12	13		NA	NA	NA	No	YES	No	No	No	NA	NA
I	384350	384479	130	1	SPAC1751.04	SPAC1751.04.1:exon:1-SPAC1751.04.1:exon:2	int_40	88	54	34	0	0	48	2	2	A;A	UUUUCUAACUU;UUUUUCUAACU	17;18	76;12	dbr1_1;dbr1_2	7	4	4.92297	5.0712	1.33333	2.5	3.30247	3.27826	GTATGCTCCTTCTTCCTTCACAATTTACGAACCATGTAAAAGGGGAGTTTCTTTTCTCTTCTTTAAATGTTTCTTTGTTTACTTTTACTGGTAAAATCGAACCCTTTTTTCTAACTTTTTCTTTTTGTAG	UUCUAAC	UUCUAAC	17	76		NA	NA	NA	No	YES	No	No	No	NA	NA
I	4502790	4502994	205	1	SPAC1851.03	SPAC1851.03.1:exon:2-SPAC1851.03.1:exon:3	int_914	114	67	47	0	0	47	3	2	A;A;A	UUGACUAACAU;UUUGACUAACA;GAUUUUGACUA	13;14;17	110;3;1	dbr1_1;dbr1_2	19	13	8.16768	8.30636	20	2.8	5.18284	4.85994	GTAAGCAATTATGTTTGTAAACTTCTAGTTTCCTGTTTTTAAGTTTGGATACAATCTTCGTGAACAAAACAGGCATTAGACAAGTATAATGGACACTAAGTGTGTAACTTGACTTATCTTTCAATTCTTCAATTTTATTACATTTATGTCATACCGTACTATTTCGTTTTAATTAGCTTTGGATTTTGACTAACATCCTTTCTAG	GACUAAC	GACUAAC	13	110	UUUUGAC	17	1	NA	No	YES	No	No	No	NA	NA
I	642132	642217	86	-1	SPAC1D4.03c	SPAC1D4.03c.1:exon:2-SPAC1D4.03c.1:exon:1	int_1251	95	43	52	0	0	51	2	2	A;A	UUUGCUAACUA;CUUUGCUAACU	13;14	69;26	dbr1_1;dbr1_2	33	21	5.28907	5.43086	17	11	3.62799	3.5089	GTACGTATACAATGATCTATTTTTCTTTACAATTTCAATACGATCGCTATCTTTGGGCTCATTTGCTTTGCTAACTATGTTTTTAG	UGCUAAC	UGCUAAC	13	69		NA	NA	NA	No	YES	No	No	No	NA	NA
II	2774094	2774222	129	1	SPBC685.02	SPBC685.02.1:exon:3-SPBC685.02.1:exon:4	int_2950	25	15	10	0	0	13	2	2	A;A	GUUACUAACAU;CGUUACUAACA	14;15	24;1	dbr1_1;dbr1_2	2	0	5.15867	5.03111	1	0.5	3.19157	3.06553	GTAAGTGACACAACCAATTAACTCGAAAATTATTTCGTTATCATTACAACTTTTAATTTTTTTTACGATGATTAGAATCCTTTTCGTAATATGATTGTCTGAACTATCGTTACTAACATCTTTTACTAG	UACUAAC	UACUAAC	14	24		NA	NA	NA	No	YES	No	No	No	NA	NA
II	365631	365765	135	1	SPBC1271.04c	SPBC1271.04c.1:exon:1-SPBC1271.04c.1:exon:2	int_2402	41	22	19	0	0	20	3	2	A;A;A	AAUACUAAUUG;CAAUACUAAUU;AUGACUUACUU	10;11;50	37;3;1	dbr1_1;dbr1_2	33	25	4.7581	4.96552	34	26	6.97085	6.83461	GTATGTTTAAAATGTAGTTTTTTTTTCTTGATATTCTTTTAGCTTTCATACGCTATTCTGTTAAAATTGTGAAAAAATATGACTTACTTTATGCCTGCTAGGCACATATCGATTGAGCAATACTAATTGTTACAG	UACUAAU	UACUAAU	10	37	GACUUAC	50	1	NA	No	YES	No	No	No	NA	NA
II	1450795	1450886	92	-1	SPBC32H8.01c	SPBC32H8.01c.1:exon:3-SPBC32H8.01c.1:exon:2	int_3672	6	4	2	0	0	6	1	2	A	UUUUUUAACCA	19	6	dbr1_1;dbr1_2	0	0	1.17386	1.9511	0.5	0.2	-0.116353	-0.824529	GTAAGTAATCATTGTGAAAACCTTCATGGTTTGAGTTGATACATAATTTAATGGGAAGGAAAAAGTTTTTTTAACCAACAAAATAAAAATAG	UUUUAAC	UUUUAAC	19	6		NA	NA	NA	No	YES	No	No	No	NA	NA
I	4767608	4767710	103	1	SPAC1782.07	SPAC1782.07.1:exon:3-SPAC1782.07.1:exon:4	int_984	85	42	43	0	0	33	3	2	A;A;A	UUUACUAAUAU;UUUUACUAAUA;UCAUUUUACUA	13;14;17	75;7;3	dbr1_1;dbr1_2	48	32	5.66626	5.9808	9.8	3.66667	5.82384	5.37704	GTAAGTTAATGACTGAAGAATCGATAAGCAGCTATGGTTTGCAGCATTTTTCTATACTTCTAAATTGTGTCAATAATTGTCATTTTACTAATATGTGGTTTAG	UACUAAU	UACUAAU	13	75	AUUUUAC	17	3	NA	No	YES	No	No	No	NA	NA
II	3399467	3399547	81	-1	SPBC13A2.01c	SPBC13A2.01c.1:exon:3-SPBC13A2.01c.1:exon:2	int_4121	59	29	29	0	1	27	3	3	A;A;A	CAUACUAACUU;ACAUACUAACU;AUAACAUACUA	12;13;16	54;4;1	dbr1_1;dbr1_2;wt_2	23	12	5.058	5.51727	24	6.5	4.57141	4.26676	GTATGTAGTCGGATTCTAAAAGAAGCGATATTTAATCAATACAGTCTCTGCAAACTTAATAACATACTAACTTGACTTTAG	UACUAAC	UACUAAC	12	54	AACAUAC	16	1	NA	No	YES	No	No	No	NA	YES
II	1806499	1806728	230	1	SPBC18H10.19	SPBC18H10.19.1:exon:1-SPBC18H10.19.1:exon:2	int_2746	31	19	12	0	0	23	2	2	A;A	GUGUCUAACCU;UGUGUCUAACC	12;13	28;3	dbr1_1;dbr1_2	20	8	7.37077	7.19467	1.3125	3	4.31494	4.40821	GTATGTGAACATGCTTTGATAAACAAAAGTATCTGAATGGTATCATTATATCTAGGTTATTTGCTTGATTGAAAAGGTTAATCAGTTTGTTTATACAAGTGATTTGCCAAAATTTCGTTGCTCAAATCCTTGAAACAAAGCCCTCAATTGATAGTTTATACCTTGTATCTCTTTTACCCATATACAAATTTTGTATGTATTTATGTTCTTTGTGTCTAACCTCTCATTAG	GUCUAAC	GUCUAAC	12	28		NA	NA	NA	No	YES	No	No	No	NA	NA
III	144676	144837	162	1	SPCC320.11c	SPCC320.11c.1:exon:2-SPCC320.11c.1:exon:3	int_4381	61	40	21	0	0	38	2	2	A;A	CAAGUUAACAU;UCAAGUUAACA	12;13	51;10	dbr1_1;dbr1_2	52	52	6.8905	6.93847	2.78947	4.41667	7.0253	7.08234	GTAAGATTTTTGAATATGGCCACCATTCATTCTACCCCTAATATCAAAAATTACGCTAAAAAATGACCTTTTCAATTGAAACAAATATTTTAGCGCAAATAAAGTGCAGGACGGAGTGATTCTTTTTTTTTATTTAGTTCAATCAAGTTAACATACTTATAG	CCCUAAU	AGUUAAC	12	51		NA	NA	NA	No	No	No	No	No	NA	NA
I	5189769	5189968	200	1	SPAPJ691.03	SPAPJ691.03.1:exon:1-SPAPJ691.03.1:exon:2	int_1076	55	38	17	0	0	34	2	2	A;A	UUUUCUAACAA;UUUUUCUAACA	18;19	45;10	dbr1_1;dbr1_2	71	67	7.46295	7.52925	72	17	4.93536	5.02849	GTATGTTATGCGTATAATAATGAAACAAAATAAAAAAAGGAATTACTGTTAAACATGGATATACATTTTTTAAGGACACCTGAAGAAGCCAGTTCTGAAGGTGATGCGGTAATACATATCTGTTGAAAGATACATATGATTGCTTCAAGTCGATTGTTTCATGTTACTTTTTACTTTTTCTAACAACATTGCTGTTTTAG	UUCUAAC	UUCUAAC	18	45		NA	NA	NA	No	YES	No	No	No	NA	NA
I	2700522	2700657	136	1	SPAC644.15	SPAC644.15.1:exon:1-SPAC644.15.1:exon:2	int_574	49	25	24	0	0	28	3	2	A;A;A	UAUACUAAUUG;UUAUACUAAUU;UUAAUUUAUAC	12;13;18	47;1;1	dbr1_1;dbr1_2	267	182	7.34601	7.86524	53.6	91.5	7.77669	7.43154	GTACGTTATATTTTACTAGAAAAGTTGTGAATGTACTTCTACCGATACTGGTAAAAGATCTTTTCCATAGCGTGTAGTCGTCTTATTCCTTCTTATTCGGTTTTTGTTAAATTAATTTATACTAATTGTTGCGTAG	UACUAAU	UACUAAU	12	47	AAUUUAU	18	1	NA	No	YES	No	No	No	NA	NA
III	2201525	2201628	104	1	SPCC830.10	SPCC830.10.1:exon:1-SPCC830.10.1:exon:2	int_4822	47	27	20	0	0	20	2	2	A;A	AUAACUAACAA;GAUAACUAACA	20;21	46;1	dbr1_1;dbr1_2	45	34	5.55769	5.63928	46	17.5	4.75963	4.69155	GTAAGTCAATTTTGGAAGGATTCTTCATAATTAATTAATGTGCGGTATCTGCATCTTCAATATTTTTCAGCGGAATGATAACTAACAAGATTGCTGTCCCATAG	AACUAAC	AACUAAC	20	46		NA	NA	NA	No	YES	No	No	No	NA	NA
II	2264874	2264999	126	-1	SPBC21H7.06c	SPBC21H7.06c.1:exon:2-SPBC21H7.06c.1:exon:1	int_3831	151	62	89	0	0	54	2	2	A;A	AUAACUAAUAC;CAUAACUAAUA	13;14	142;9	dbr1_1;dbr1_2	21	5	3.3524	3.39046	11	6	4.11717	4.09411	GTATGTCGCTTCTCTGGCACTTTCGCACAATTTTTACATTAAACGAAGTTTTTTCACGCTAGAAGTTCAAAAATAAAACTTAAATAAATGTTTTTATTATATACACATAACTAATACACAATCTAG	AACUAAU	AACUAAU	13	142		NA	NA	NA	No	YES	No	No	No	NA	NA
II	401911	402016	106	-1	SPBC106.12c	SPBC106.12c.1:exon:4-SPBC106.12c.1:exon:3	int_3429	20	11	9	0	0	14	2	2	A;A	UAUACUAACAC;AUAUACUAACA	15;16	18;2	dbr1_1;dbr1_2	40	37	3.29142	4.06866	20.5	9.5	5.09985	5.44142	GTATGTTTTGAATTTATAAGATAAGCTGTAAACTTTTTTATTACTCTATTAGCTCTTAGTCTACATGCACTGTTATTATCATTATATACTAACACAGCAATCTTAG	UACUAAC	UACUAAC	15	18		NA	NA	NA	No	YES	No	No	No	NA	NA
II	4008303	4008507	205	1	SPBC3B9.12	SPBC3B9.12.1:exon:1-SPBC3B9.12.1:exon:2	int_3287	25	10	15	0	0	16	2	2	A;A	GUUAUUAACCA;UGUUAUUAACC	13;14	23;2	dbr1_1;dbr1_2	17	7	3.99979	3.34537	3.6	1.6	3.42795	3.05925	GTAAGTACAATGGAAATAACGTAGAAGCCTAATCAAATTGATGAAATTCTACCCTTTATTACATCGAAGTTATCAAATTTAAATTTATTACTTGTTTTTGATATCCTTGTGCTTCATGAATTTTTTATTACTAGTGCCGCTTGAGTTTATGTTGAAGAAAACAGACTTGTGAAATTCAATGATATGTTATTAACCACTGAGATAG	GCCUAAU	UAUUAAC	13	23		NA	NA	NA	No	No	No	No	No	NA	NA
III	757425	757505	81	1	SPCC1020.11c	SPCC1020.11c.1:exon:1-SPCC1020.11c.1:exon:2	int_4538	93	59	34	0	0	35	2	2	A;A	AGUGCUAAUGA;GAGUGCUAAUG	12;13	85;8	dbr1_1;dbr1_2	26	15	6.23531	6.36087	6.75	5.33333	4.47806	4.71215	GTAAGAAATGATTGCAGAGCTAGATTTTCTTGGTACTAGTTTTTTTAAGGATTTTATAATTGAGTGCTAATGAATCCAAAG	UGCUAAU	UGCUAAU	12	85		NA	NA	NA	No	YES	No	No	No	NA	NA
III	1446908	1447155	248	-1	SPCC61.04c	SPCC61.04c.1:exon:2-SPCC61.04c.1:exon:1	int_5148	295	158	137	0	0	111	2	2	A;A	UAAGCUAACUU;UUAAGCUAACU	13;14	259;36	dbr1_1;dbr1_2	11	10	8.45677	8.35515	1.5	1.83333	4.69643	4.73933	GTACGTCGCAAACGATGGAAAAACTTGAAGAGTTGAATGGTTGAACGGGAAAGAGTGATTTCGTAGTGAAATGTTAAATTCGAAAGTGATCGAAGATTGTAAATATTTTTTTTACTAAAATAATATTTCTTTCAATTAATGTAGAAACAAACTTTCTATTGATTCTCTTTTTTTGTTCAACTTTCATATTTTAGATGCTGATTAGAAAATCATTTAAATGAATCGCGTTAAGCTAACTTCTTCATTAG	AGCUAAC	AGCUAAC	13	259		NA	NA	NA	No	YES	No	No	No	NA	NA
I	1194408	1194519	112	-1	SPAC4C5.02c	SPAC4C5.02c.1:exon:4-SPAC4C5.02c.1:exon:3	int_1393	15	8	7	0	0	11	2	2	A;A	UAUGCUAACGG;UUAUGCUAACG	12;13	13;2	dbr1_1;dbr1_2	14	15	4.69741	5.08876	7.5	8	4.69058	4.5115	GTATGACACTCCAGCTAACAGAGATTCAGCATTTACAATGCGACATCTCTTCATTCATAATTCCAAAGCTATATTTTGGTTTTTGATGGTTCTTATGCTAACGGTGGTTTAG	UGCUAAC	UGCUAAC	12	13		NA	NA	NA	No	YES	No	No	No	NA	NA
II	4005640	4005803	164	1	SPBC3B9.10	SPBC3B9.10.1:exon:4-SPBC3B9.10.1:exon:5	int_3285	29	18	11	0	0	23	2	2	A;A	UUUGUUAACCA;AUUUGUUAACC	10;11	20;9	dbr1_1;dbr1_2	125	128	4.39297	4.30975	63	129	6.2839	6.46481	GTAAGTAATTATTGCAAAATAGATAAATGAATCACTATGATTGATAAGATAAAATGCGCGATTTATACGCATATCTTAGCCAAGCTTATTAGCTCCATGGTTTAAAAATATAGTTTTCTTTTATGCTATGTATAAATTTCTTTGAGATTTGTTAACCAAATTAG	UGUUAAC	UGUUAAC	10	20		NA	NA	NA	No	YES	No	No	No	NA	NA
I	798230	798317	88	-1	SPAC16C9.04c	SPAC16C9.04c.1:exon:3-SPAC16C9.04c.1:exon:2	int_1297	55	20	34	0	1	28	2	3	A;A	GUCGCUAAUGU;UGUCGCUAAUG	10;11	50;5	dbr1_1;dbr1_2;wt_2	48	18	4.96045	5.54772	24.5	3.8	4.85947	4.49611	GTATGTAATTCAGATTATAGAATTCTTGTTTAAGCATAATCTTGTTTAAATTCACTTTTATTTTTAAACATGTCGCTAATGTTTTTAG	CGCUAAU	CGCUAAU	10	50		NA	NA	NA	No	YES	No	No	No	NA	NA
I	960418	960607	190	1	SPAC222.09	SPAC222.09.1:exon:1-SPAC222.09.1:exon:2	int_209	173	106	66	0	1	56	4	3	A;A;A;A	GUAACUAACUA;UGUAACUAACU;UGGACUAAUUU;AUUUGUAACUA	13;14;24;17	156;10;6;1	dbr1_1;dbr1_2;wt_2	16	8	7.51126	7.73225	2.83333	9	5.75942	5.40374	GTATGTGTAGCTGAAGTTTTTCAAGGTTGACTACGGATAAGATCCCGTATGGATAATCGTATGCTCTCTCTGCTTCTGTATCAGCGAGACACTGTATGAGAGAGGTATTTTTTCCTTGTAATACAGTATCATTCTCTTTGAGAAGTCTTTTAACATTATTGGACTAATTTGTAACTAACTAAGCATGTAG	AACUAAC	AACUAAC	13	156	GACUAAU	24	6	NA	No	YES	No	No	No	NA	NA
II	2211006	2211085	80	1	SPBC14C8.04	SPBC14C8.04.1:exon:3-SPBC14C8.04.1:exon:4	int_2815	134	60	74	0	0	28	2	2	A;A	UUUAUUAACAU;UUUUAUUAACA	12;13	121;13	dbr1_1;dbr1_2	1491	1152	7.56926	7.37328	373	288.25	9.43378	9.21713	GTATGTAAAGTAATTGATCCAATTATAATTGTCACTGACCTTTTTTACTTTCCTTCTAATTTTTATTAACATTTTTTTAG	UUCUAAU	UAUUAAC	12	121		NA	NA	NA	No	No	No	No	No	NA	NA
II	2608106	2608307	202	-1	SPBC25B2.06c	SPBC25B2.06c.1:exon:2-SPBC25B2.06c.1:exon:1	int_3893	133	82	51	0	0	62	2	2	A;A	UUGUCUAACCC;UUUGUCUAACC	11;12	115;18	dbr1_1;dbr1_2	8	5	6.86956	6.92497	4.5	3	4.36038	4.1047	GTAAGTATTTTTGCTATTTGAACTTCTGCGTACCTTGAGTCTCAGTTCTTGTATGAACTTTACTCTCAAATTAATGGTTGTTTGCGTAGTTAATTATTTTGGATTTATTGTTAAATCGTTCATGTTTTGTTTAACGATTTCCAAACAAAAAAAGTCTGAATATTTTACCTCTCCTTCAAAGAGTTTGTCTAACCCTAGCTAG	GUCUAAC	GUCUAAC	11	115		NA	NA	NA	No	YES	No	No	No	NA	NA
I	2851558	2851666	109	-1	SPAC3F10.16c	SPAC3F10.16c.1:exon:2-SPAC3F10.16c.1:exon:1	int_1792	403	221	181	0	1	94	2	3	A;A	UUUGCUAAUUG;UUUUGCUAAUU	15;16	362;41	dbr1_1;dbr1_2;wt_2	46	34	7.49908	7.62703	47	17.5	5.17818	5.19698	GTATGTCAGTAACTTAACAACTCTTAAAGTTAGACTTGTGATTTTCTCTTTACATGCAGCTTATGCTGGATTGTCAATTGAAAGCTTTTTGCTAATTGTCATTGAGTAG	UGCUAAU	UGCUAAU	15	362		NA	NA	NA	No	YES	No	No	No	NA	NA
I	5044232	5044478	247	-1	SPAC22E12.13c	SPAC22E12.13c.1:exon:3-SPAC22E12.13c.1:exon:2	int_2292	114	72	42	0	0	60	2	2	A;A	UAUACUAACUU;GUAUACUAACU	14;15	91;23	dbr1_1;dbr1_2	222	184	7.86591	7.86614	9.69565	5.96774	6.75619	6.84829	GTATGTTTTTTTTATAATAAAGGAATGCAAAAACGTTATACAGACTTGGTTGAGGAAGATGATTGATTTTGAAAGAGGAAAAATTTTTTTCTGTTGCCTTGTTTTGAAATGATACTTTTCTTCTTCAAATTCTACCTTAAATGGTGTACTTTTTCCTTTATATGCCCATGAACGAAGAAAGTTTTCTATTGTTTTTTTAAATGTTTTGCTTCCACCTATATGTATGTATACTAACTTCAATGTCTAG	UACUAAC	UACUAAC	14	91		NA	NA	NA	No	YES	No	No	No	NA	NA
II	215356	215605	250	1	SPBC660.11	SPBC660.11.1:exon:1-SPBC660.11.1:exon:2	int_2381	200	120	80	0	0	60	2	2	A;A	UCUACUAAUGC;AUCUACUAAUG	11;12	187;13	dbr1_1;dbr1_2	137	91	9.12738	9.0369	6.57143	5.75	8.29949	8.30383	GTATGTAAACTATTACTGGTTTTAGCAATTTCGAGTTAGAACAAAATTTTCTTATGTTTAAGCGCTAAAGCTAAAGCTCTCTCTATTAAAATCAGTGCATAATTTGGAGTTGTTGAAAATTTACTTTTTAGAAGTCATACTTTATATTTTTCACAAAAACGATTTTAAAACGGAGCTATGCGAGCTTATATTTACTCGAAACTATCTGTGCTACTTTAATTATATTTGATCATCTACTAATGCTTTTTAG	UACUAAU	UACUAAU	11	187		NA	NA	NA	No	YES	No	No	No	NA	NA
I	2852039	2852174	136	1	SPAC3F10.17	SPAC3F10.17.1:exon:1-SPAC3F10.17.1:exon:2	int_615	52	28	24	0	0	34	2	2	A;A	UUGACUAACGA;GUUGACUAACG	16;17	45;7	dbr1_1;dbr1_2	6	2	6.51684	6.799	3.5	3	2.3094	1.77114	GTAAGAAATGAATAAAAAAATAAATTTTTGCCTGTGCGATTGTTGGTTGAACAGAAAATTGTATTTTAGCAATCTATTAATCTTGATTTATTTGTCAAATAGGGAATTGTTGGTTGACTAACGAAAATATGAATAG	GACUAAC	GACUAAC	16	45		NA	NA	NA	No	YES	No	No	No	NA	NA
II	1656015	1656249	235	1	SPBC21B10.08c	SPBC21B10.08c.1:exon:1-SPBC21B10.08c.1:exon:2	int_2710	48	31	17	0	0	30	2	2	A;A	UUUACUAACUA;CUUUACUAACU	13;14	38;10	dbr1_1;dbr1_2	205	137	9.77189	9.70142	12.875	23	6.47459	6.15043	GTGAGTTAAAAATTGAATGCAAAAGCATTATCAAGGTGTTTATAGAATAAGCGTGGTGAATTGAGAAATGTCTATCTCAACTGCATTGTAAAGTTGGAAATAAATGAGATGCCACGACATGTCAGTTTAAATCTTCTGTGCTGTAATAGAAATCTACTCTCATTACTGTAATTGTTGTTTGCTTTTGTTCAGGAATTTATCCTTTTCTTGAATCCTTTACTAACTATATGTACAG	UACUAAC	UACUAAC	13	38		NA	NA	NA	No	YES	No	No	No	NA	NA
II	1937959	1938300	342	-1	SPBC16E9.11c	SPBC16E9.11c.1:exon:2-SPBC16E9.11c.1:exon:1	int_3758	51	33	18	0	0	40	4	2	A;A;A;A	UAUACUAACUA;UUAUACUAACU;AAAUUCUAGNN;UUUGGAUAGAU	12;13;2;245	35;9;6;1	dbr1_1;dbr1_2	40	28	10.2438	10.0534	5.125	3.625	4.61141	4.2547	GTAAGCACATGACAAATGCGGCGGATAACATGATCAATTGAAAATAAAAAAAAAAGAGATGGTAGAGATTGGACCTTGGATGTTCTTAGATTTGGATAGATATGTTTATACTCTTAGTATTCACGTTAGTTCGGAGTCTAAGCATTTCTTTGATGGTCGGATAGTTTTTGTGGCTCCATAACGAAATTTTTTTAACAATTTTCTAATAACAACATCATTTGTATATTATCATATCCTATCCTTTTTGCAAATCTTTTATTACTACTGCATCTTTTTCTTTTTTTTTTTTCAATATGTTGATTTTGCCCTTTTCTTTGTTCCGTTATACTAACTAAATTCTAG	UACUAAC	UACUAAC	12	35	AUUCUAG	2	6	NA	YES	YES	No	No	No	NA	YES
I	2436242	2436466	225	1	SPAC6B12.13	SPAC6B12.13.1:exon:1-SPAC6B12.13.1:exon:2	int_526	19	12	7	0	0	17	2	2	A;A	GAUGCUAAAUA;UGAUGCUAAAU	11;12	13;6	dbr1_1;dbr1_2	74	55	5.95402	6.13429	2.77778	2.54545	6.38603	6.56309	GTAAGTGAAGTTCTGGTGATTTTACGAAGAAGAGAATAGGCCTTGTTCCATCCTTTGGCAACAAGCACAACTTTCAGACTTATATTGATTTTAAAAATTGGACAGTATGAGTCTATTTATACATATCTACATTCTTTATCTTTGATTTATCAAAGCACTAGAGGCTTGATACACGAACATAGAAAATTAAAGGATTTAACATGATGTGATGCTAAATATTACTAG	AUUUAAC	UGCUAAA	11	13		NA	NA	NA	No	No	No	No	No	YES	NA
I	5017253	5017420	168	-1	SPAC890.07c	SPAC890.07c.1:exon:4-SPAC890.07c.1:exon:3	int_2285	568	329	236	1	2	104	3	4	A;A;A	UAUACUAAUUU;GUAUACUAAUU;UCCGAUCAGUA	8;9;17	496;49;23	dbr1_1;dbr1_2;wt_1;wt_2	124	83	8.27088	8.14689	125	42	7.89798	7.6314	GTATTTTTACTGTTTTATTAATCGCAACAATCAACGACGTAGAAGCAATTTAATTAGGTTTTCGATCTCTTCGTGAAGGCAATTGTCATCAAGAGTTATAAATTTTTATCTTTTTAAAATACTTGAATTGTGATTTTTTGATTATCCGATCAGTATACTAATTTTCAG	UACUAAU	UACUAAU	8	496	CGAUCAG	17	23	NA	No	YES	No	No	No	NA	NA
II	988002	988304	303	-1	SPBP35G2.11c	SPBP35G2.11c.1:five_prime_UTR:2-SPBP35G2.11c.1:exon:1	int_3575	73	49	24	0	0	38	3	2	A;A;A	GUUACUAAUUU;CGUUACUAAUU;AAUAAUAACAU	12;13;203	66;5;2	dbr1_1;dbr1_2	6	4	9.38202	9.24908	1.75	5	5.29361	5.13125	GTAAGATAATTTACTTGCACAAAGTCTTAAGTTCAATGTTTGTACAACAAATTACAAAAAGGATTGAAGGACTAAAGTGGTTGATGGAACTTTAATAATAACATCTTCGATAAATATTTACGAGAACGTAAAAATCCTTGTCTTGATAAAGATTGTTTTTTCTATTGCCTTTACTCTGAAATTGCTAGCACTGTTGCTCACTTCGGCGTCACATATTTCCTCAATTTCAAAATTCATATGAACTATTAAATTTTACTTTGCAACTAATTTCATTAGTTAATATCGTTACTAATTTTGCTTTAG	UACUAAU	UACUAAU	12	66	UAAUAAC	203	2	NA	No	YES	No	No	No	NA	NA
I	4843232	4843309	78	-1	SPAC4F10.07c	SPAC4F10.07c.1:exon:2-SPAC4F10.07c.1:exon:1	int_2238	5	3	2	0	0	4	2	2	A;A	AGUAUUAACAU;AACAUUUACAA	14;8	3;2	dbr1_1;dbr1_2	4	2	1.89744	2.18925	5	1.5	3.59788	2.6673	GTAAGTTAAAGTGTGTATCATAAGCTTGCTTGAGGTCCACCCATCCTTTACTTGAAAAGTATTAACATTTACAAATAG	UAUUAAC	UAUUAAC	14	3	CAUUUAC	8	2	NA	YES	YES	No	No	No	NA	NA
I	756611	756778	168	-1	SPAC4G8.02c	SPAC4G8.02c.1:exon:3-SPAC4G8.02c.1:exon:2	int_1280	57	44	13	0	0	37	2	2	A;A	AUUAUUAACAU;GAUUAUUAACA	13;14	52;5	dbr1_1;dbr1_2	58	34	9.11374	9.08876	2.95	1.75	7.3842	7.56776	GTAAGTAAAAAATAGATAAAGGAAACGAAATTCCTGGAAATAATAGTAATTCCTAAACGAATATTTTGTTTCCTTGGATTTTGTAGCACATAAACTCTGTTTTAGTCTGCTTATTTTTCTTTCAAATTTTTCTTCGATTGGCATCGTGATTATTAACATTAATATTAG	CAUUAAU	UAUUAAC	13	52		NA	NA	NA	No	No	No	No	No	NA	NA
III	748907	748989	83	1	SPCC14G10.04	SPCC14G10.04.1:exon:1-SPCC14G10.04.1:exon:2	int_4531	31	11	19	0	1	17	2	3	A;A	UUGGCUAACGU;AUUGGCUAACG	11;12	29;2	dbr1_1;dbr1_2;wt_2	109	69	7.7818	7.54492	3.33333	4.11765	6.07303	5.64199	GTAAGTTAGGGATGCTAAATAATCTTGGTTGATGAAAACACCTTCGAGAACCAAAGTATGGAATATTGGCTAACGTTTTACAG	GGCUAAC	GGCUAAC	11	29		NA	NA	NA	No	YES	No	No	No	NA	NA
II	1489345	1489529	185	-1	SPBC11B10.02c	SPBC11B10.02c.1:exon:3-SPBC11B10.02c.1:exon:2	int_3679	60	35	25	0	0	26	2	2	A;A	UUUGCUAAUCU;UUUUGCUAAUC	10;11	56;4	dbr1_1;dbr1_2	74	51	8.53846	8.51854	6.25	13	7.99998	7.75476	GTATGTTTTATCTTTATATTTGGGTAATAATTGATATGAGGGCTACTTCTAGAAAGATATTTTATTAGCTGCTTGGAAAGCAATGAAGTACTCCCTGTTTACTGTTGTTGTTGGAGCTGGCGATTTCAGGCCTTTGTTGTTTTTTACCCTTTTCTCGCCTATATATTTTTTGCTAATCTTAATAG	UGCUAAU	UGCUAAU	10	56		NA	NA	NA	No	YES	No	No	No	NA	NA
I	956273	956359	87	-1	SPAC222.07c	SPAC222.07c.1:exon:2-SPAC222.07c.1:exon:1	int_1335	232	111	121	0	0	43	2	2	A;A	UAAGCUAAUGU;CUAAGCUAAUG	13;14	216;16	dbr1_1;dbr1_2	19	9	4.81518	4.9248	1.42857	0.416667	6.07862	6.07355	GTAGGAATTAATTACAACTGTGTGTATAAAGCAGTTGACGAACTAAAAATATTGGTCATTGACAACCTAAGCTAATGTATTTATTAG	AGCUAAU	AGCUAAU	13	216		NA	NA	NA	No	YES	No	No	No	NA	NA
I	4083770	4083947	178	1	SPAC23A1.03	SPAC23A1.03.1:exon:1-SPAC23A1.03.1:exon:2	int_849	177	88	89	0	0	45	2	2	A;A	GAUGCUAAUGU;AGAUGCUAAUG	10;11	171;6	dbr1_1;dbr1_2	26	8	8.84666	9.07574	0.9	0.321429	7.28895	7.3072	GTAAGATTTTATAGAAGGAGGAAATGCGCGAGGTTGGATAGGAACGGTGATATTATTTTGCTCAATTAGCGTGAAGTTTGAATCCAAAATACAATTCGAGAGGTTATATTATCTTTACGCCTTGCAATTGCTTAAATACTCTGTTAAATTATAAACAATAAGATGCTAATGTTATTAG	UGCUAAU	UGCUAAU	10	171		NA	NA	NA	No	YES	No	No	No	NA	NA
III	1538314	1538529	216	1	SPCC584.05	SPCC584.05.1:exon:2-SPCC584.05.1:exon:3	int_4684	93	60	33	0	0	38	2	2	A;A	GUGCCUAACAG;UGUGCCUAACA	12;13	85;8	dbr1_1;dbr1_2	16	8	8.54244	8.14363	0.303571	0.36	4.01793	3.30975	GTAAGAGATGGAACCCGTGAAACTTATAACGTGCACTGAAATGTTTACTGGGAATTTTGATTTGGATATTGTTTAAATGGAATTGAATTTGTGAATATGCAGCATATTATTTCCTCCGACATATTTTTTTTAAACTATCAAAATTGGCCTATTTCTAATTTGGAGCCGTTCAGTTTCACATCTTTGGCTTTTGGTTTGTGCCTAACAGATAAATAG	GCCUAAC	GCCUAAC	12	85		NA	NA	NA	No	YES	No	No	No	NA	NA
III	2208292	2208387	96	-1	SPCC1919.03c	SPCC1919.03c.1:exon:4-SPCC1919.03c.1:exon:3	int_5314	57	31	26	0	0	30	2	2	A;A	CUUGCUAACUU;GCUUGCUAACU	17;18	48;9	dbr1_1;dbr1_2	20	15	4.87799	4.63693	21	16	5.9842	5.99694	GTATGAGTTTTTCATGGTGTGCTTTTTTCTATATTTGAGCCTCCCTTTATAGGTTGTTTATCCTGTTTTAAGCTTGCTAACTTTTTCGCCAAATAG	UGCUAAC	UGCUAAC	17	48		NA	NA	NA	No	YES	No	No	No	NA	NA
II	1794322	1794492	171	1	SPBC18H10.14	SPBC18H10.14.1:exon:1-SPBC18H10.14.1:exon:2	int_2742	404	233	170	1	0	97	2	3	A;A	GUUACUAAUGA;UGUUACUAAUG	14;15	361;43	dbr1_1;dbr1_2;wt_1	24	21	9.88911	10.3128	5	2.44444	8.74572	8.92111	GTATGTGCTAAACGAAGAGAAGTTCATGACATCTTCGGAATCGATTTCTTGCACGATTTATTGTGTTGTCGAACTTGTTCCGTGTACAGAATGTTAATGATACTGTATCTCTCGATACGACATAACATTTGTTTCTTTTTTTTAGAATGTGTTACTAATGATTTTTTTTAG	UACUAAU	UACUAAU	14	361		NA	NA	NA	No	YES	No	No	No	NA	NA
II	4092385	4092539	155	1	SPBC56F2.10c	SPBC56F2.10c.1:exon:1-SPBC56F2.10c.1:exon:2	int_3305	318	177	141	0	0	81	3	2	A;A;A	UUCAUUAACCC;AUUCAUUAACC;AAUAUUCAUUA	12;13;16	297;18;3	dbr1_1;dbr1_2	9	5	9.0264	8.89202	2.5	0.857143	2.80989	2.41204	GTAAGCAATATTAGCTAGCATGCTTCTCATTCATGTCCACCCGTCGGTAAATAAGGTCGTTGCGGGCAGAACCTGTTTAGTTTATCTGTACTTTCGATTTTTTGATGTGACATTAGACCAAATTTTTCCCCGAATATTCATTAACCCAAATATAG	CAUUAAC	CAUUAAC	12	297	UAUUCAU	16	3	NA	No	YES	No	No	No	NA	NA
I	181750	182000	251	-1	SPAC13G6.05c	SPAC13G6.05c.1:exon:2-SPAC13G6.05c.1:exon:1	int_1148	17	12	5	0	0	13	2	2	A;A	UCUACUAACAC;UUCUACUAACA	106;107	13;4	dbr1_1;dbr1_2	17	17	5.5987	5.45064	6	2	5.01291	4.9828	GTAAGTGATATGAATAAGGCTATGAGTTATATATATTATCGCAGTCTTCTTTTAGGATAAAAACAAAAGGCGTCTTTTTGAGGTTTTCTATGCTGCGATAACTCCATACTCTTCGACAATAAATAAGCTAAATAGAATTCTACTAACACAAATTACTTTGCTGGGAGCTCATACTGTCTTACTCACGGATAACTTTTTGTTAACCTAAGTAGGATGCGTTGCGAGTAACCAGAAAGTAATTGATTGAACAG	UACUAAC	UACUAAC	106	13		NA	NA	NA	No	YES	No	No	No	NA	NA
III	1512703	1513173	471	-1	SPCC584.11c	SPCC584.11c.1:exon:2-SPCC584.11c.1:exon:1	int_5160	245	143	101	0	1	90	4	3	A;A;A;A	AUUUCUAACUC;UAUUUCUAACU;GUGAUUUACAA;UAUUCUAAUAA	12;13;364;45	225;17;2;1	dbr1_1;dbr1_2;wt_2	37	31	8.33825	8.17412	2.53333	2.90909	4.52233	4.59691	GTAAGTACAACTGGACATTTGGATTCGATCGCTGCCGAGTGCTTTTTTCTTCGTTTCAGCGAGGATTTGTAATTCAAACGCAAAAGAATGGATTTATACAGTGATTTACAATGTGTATGTTCAATTTTTGGTACTCTTTGGCTTGATTAGAGGTTGTAAAAATATGGACCCCTAAAAACGGATCGAGTGTTTGTCCTATGAATAAAAACGGTAATATAATCGACTAATAATTGGATATCGATATGTATTCACTGACATTTCCTTCATGTTTTCGATTATTTTTTTTGTCTTAAAAATTTTTTTTTAAATTCGATGAGCAAAAAACAAAATTCTTTTTTCTTTTCCGTTTTTTTCATCTATCAGACATCTGCTATTTGAATCCATTTTTTTCGTGTTGTC…	UUCUAAC	UUCUAAC	12	225	GAUUUAC	364	2	NA	No	YES	No	No	No	NA	NA
III	757762	757850	89	1	SPCC1020.11c	SPCC1020.11c.1:exon:2-SPCC1020.11c.1:exon:3	int_4539	48	24	24	0	0	27	2	2	A;A	CACGCUAACUA;ACACGCUAACU	13;14	44;4	dbr1_1;dbr1_2	2	0	4.35918	4.97293	1.5	0.5	3.04791	3.75476	GTAAGAAACTTGCTCGATCGTTGCTATTTTATTTTGTTTGAATAGTCAGATCTCGCATTGAAACAATTACACGCTAACTAAGTCATTAG	CGCUAAC	CGCUAAC	13	44		NA	NA	NA	No	YES	No	No	No	NA	NA
I	3927885	3927968	84	-1	SPAC2F3.04c	SPAC2F3.04c.1:exon:2-SPAC2F3.04c.1:exon:1	int_2049	7	4	3	0	0	6	2	2	A;A	UUUACUAACCU;AUUUACUAACC	14;15	5;2	dbr1_1;dbr1_2	30	25	4.59788	4.59691	7.75	8.66667	6.01679	5.84481	GTACGCAACATTGCAATGGTCCAAGTTGAAGCCTGAAGCAAAATTTGAAAACAGAATATAGTATTTACTAACCTCTCTTATTAG	UACUAAC	UACUAAC	14	5		NA	NA	NA	No	YES	No	No	No	NA	NA
I	2869172	2869264	93	-1	SPAC8F11.09c	SPAC8F11.09c.1:exon:2-SPAC8F11.09c.1:exon:1	int_1806	2	2	0	0	0	2	1	1	A	UAUAUUAACAU	19	2	dbr1_1	26	30	4.19388	3.7131	13.5	31	4.65559	4.61483	GTATGATTTAAAACCACTCACAGGCTAGACAGATAGCTTTTTTTTATAAACAATATATAGAGGTTAGTATATTAACATCGTTATGTATAATAG	UAUUAAC	UAUUAAC	19	2		NA	NA	NA	No	YES	No	No	No	NA	NA
I	4723049	4723375	327	1	SPAC17D4.01	SPAC17D4.01.1:exon:1-SPAC17D4.01.1:exon:2	int_967	120	70	50	0	0	63	5	2	A;A;A;A;A	GUUACUAACAA;CGUUACUAACA;AUAACUAAACU;UAAACUAAAUU;UAUAACUAAAC	14;15;207;202;208	100;13;5;1;1	dbr1_1;dbr1_2	304	240	10.8133	10.8422	25.4167	48.2	8.42652	8.51892	GTAAGCTAAATAAAGGGAAGCGAAGCAAGACAAAATATTATATGGTACTAGTACTAGCGATAGTACAACTGCTTGAGAAAAATACAAATAAAATGAACGAATATTACCGAACTATAACTAAACTAAATTCAAATGATGTAGAAATACGAAATTTTGTTATTACTGAATATTTTCTTTATTTTGTTTATATTTTATTTTATTTTGTTTTGTTTTGTTTTGTTTCCTTTTAATTTTCCTTCCTTTTTATTGGAAAAAAAAAAAGAAAACAAAACAAAATAAATATCTTGGAATGCATAATTGTACATCGTTACTAACAATATTCGCTAG	UACUAAC	UACUAAC	14	100	AACUAAA	207	5	NA	No	YES	No	No	No	NA	NA
II	1074647	1074819	173	1	SPBC1734.08	SPBC1734.08.1:exon:2-SPBC1734.08.1:exon:3	int_2542	15	6	8	1	0	12	2	3	A;A	UUAUCUAACGU;UUUAUCUAACG	13;14	14;1	dbr1_1;dbr1_2;wt_1	70	49	7.30718	7.51344	7.88889	6.25	6.04642	5.72315	GTATGTTTGTACCACTTTTGAGGAGGAGGAAGCAATCAATTTATGATTATTCAATCTGGAACCACTGAGAATACTATTGTCTGTGCTTTACAAATTGTTTATTGTTCCTTATATCAATACACTCTATTTTAAAATGAATTGCGCAAATTTACTTTATCTAACGTTTGTTTTAG	AUCUAAC	AUCUAAC	13	14		NA	NA	NA	No	YES	No	No	No	NA	NA
I	1275770	1275836	67	1	SPAPB17E12.05	SPAPB17E12.05.1:exon:1-SPAPB17E12.05.1:exon:2	int_284	6	4	2	0	0	5	2	2	A;A	UUUAUUAACAU;AUUUAUUAACA	13;14	5;1	dbr1_1;dbr1_2	116	156	2.76883	4.40856	58.5	15.7	8.93295	9.01343	GTAAGTAATTGCACGATCGGTGGAGATCCTGTTGTATTTTTCGTTTATTTATTAACATTTTATTTAG	UAUUAAC	UAUUAAC	13	5		NA	NA	NA	No	YES	No	No	No	NA	NA
III	652894	652999	106	1	SPCC5E4.06	SPCC5E4.06.1:exon:1-SPCC5E4.06.1:exon:2	int_4507	38	15	23	0	0	20	1	2	A	UAUAUUAAUAU	18	38	dbr1_1;dbr1_2	10	4	4.53021	4.77227	3.66667	5	3.1054	2.76918	GTATGTTTAAACTCTTGCCGTTTTTATAACGAAACGCGTTCTCAATTGCGAGAGAAAAGGTTCTTTGTTGGTTGAAATTTGTATATTAATATTTTATTTTTAATAG	UUUUAAU	UAUUAAU	18	38		NA	NA	NA	No	No	No	No	No	NA	NA
III	1266418	1266511	94	-1	SPCC23B6.01c	SPCC23B6.01c.1:exon:4-SPCC23B6.01c.1:exon:3	int_5133	244	129	115	0	0	78	1	2	A	GUUAUUGACCA	15	244	dbr1_1;dbr1_2	283	307	6.61531	6.8609	10.5185	13.3913	8.36393	8.58438	GTATGTGACGTTGAAGTAGATGTGAAGAAATTCAAAGTCTTCTATGACAACCTTTGCGTGATTGACGGGCGGGTTATTGACCACATGTTCGCAG	UAUUGAC	UAUUGAC	15	244		NA	NA	NA	No	YES	No	No	No	NA	NA
II	2490048	2490222	175	-1	SPBC557.03c	SPBC557.03c.1:five_prime_UTR:2-SPBC557.03c.1:exon:2	int_3875	34	22	12	0	0	30	2	2	A;A	UUUGCUAACAU;GUUUGCUAACA	9;10	31;3	dbr1_1;dbr1_2	7	4	6.74764	6.93376	0.666667	1.66667	2.21502	2.41937	GTAAGTAATTTGTTTTGGCCGTGAAAAATTATCATTTGATCTTTGATTCCAAATTCAGGTGCTGTTATCGTTGCAGTGTTGTTTATAGTCTATTGACTCATTGTATCATTTCCCTTCGCCCTTTTGGAACAAATGGCTTTATAAATTTATCATTTTTCGTTTGCTAACATACTAG	UGCUAAC	UGCUAAC	9	31		NA	NA	NA	No	YES	No	No	No	NA	NA
III	641925	642137	213	-1	SPCC5E4.03c	SPCC5E4.03c.1:exon:2-SPCC5E4.03c.1:exon:1	int_5012	3	0	3	0	0	2	1	1	A	UUUACUAACGU	11	3	dbr1_2	29	26	8.61662	8.9113	4.28571	5.4	5.69196	5.6673	GTAAGTTGGTCATATTGGAGGAGGTTACGAATTTGTTACATGTTTGTTTCGATGATCTACGAACAAGAGGGGTATTTGAACTATTCTAAATACTTATTAGTTTCTTTATCTATTGAGTTTACAACTTGTCTTTATTTCTGAAACTCATTCCACTTGACCACCCATATTTAATTCTTTATAAGGATAAATGATAATTTTACTAACGTGCTATAG	UACUAAC	UACUAAC	11	3		NA	NA	NA	No	YES	No	No	No	NA	NA
II	3888825	3888932	108	1	SPBC1604.21c	SPBC1604.21c.1:exon:2-SPBC1604.21c.1:exon:3	int_3268	30	18	12	0	0	15	1	2	A	CUUGCUAAUUU	12	30	dbr1_1;dbr1_2	130	115	6.63741	6.6872	32.75	19.3333	8.2449	8.12875	GTAAGTTTTATTAGAAACATGAAGAGTCATTATTACCGGTGTTGATTTGGTTTAGCTTTATGTTTTTATATTCTTTCTTGTACTGAGCGCTTGCTAATTTATCTAAAG	UGCUAAU	UGCUAAU	12	30		NA	NA	NA	No	YES	No	No	No	NA	NA
I	2765707	2765803	97	-1	SPAC6F6.16c	SPAC6F6.16c.1:exon:2-SPAC6F6.16c.1:exon:1	int_1777	8	4	4	0	0	6	2	2	A;A	AUUACUAAAUA;CAUUACUAAAU	13;14	4;4	dbr1_2;dbr1_1	29	27	4.20184	4.38931	1.03448	1.21739	4.66868	4.70738	GTAAGTCAATTTTGTTAATGGGAGATACAGCAACCTGCTATTATTTGATTCTTCTCTTATAAATTTTTGGATGAACCATTACTAAATACATGAGTAG	AUUUGAU	UACUAAA	13	4		NA	NA	NA	No	No	No	No	No	YES	NA
I	1808919	1809165	247	-1	SPAC1002.07c	SPAC1002.07c.1:exon:2-SPAC1002.07c.1:exon:1	int_1565	34	27	7	0	0	25	3	2	A;A;A	GGUUUUAACAU;CGGUUUUAACA;GCAUGCUAUCA	17;18;56	32;1;1	dbr1_1;dbr1_2	166	120	8.28121	8.10372	11.1333	8.06667	7.66322	7.68987	GTAAGCGCCGTTATGACCAAGAGGACGAAGTCGTGTAGATTCTATTAAAAGGCTAGAGCTTTTGCCAGTATCCCAGACTCACAGGGTCTGATTCTCTTATTGAATTGGAGATTACTCTTAAGCTTTTTATATGGATTTGAGAATATATGGTTTTCGTCAGCAGGGTCGATCTCTACTTCTGTCCGCATGCTATCAGATCAGTTTGTGTTACTATTTAAAAACCGGTTTTAACATTTTGTTTATGAAG	GUCUGAU	UUUUAAC	17	32	AUGCUAU	56	1	NA	No	No	No	No	No	NA	NA
II	1865332	1865413	82	-1	SPBC3H7.10	SPBC3H7.10.1:exon:2-SPBC3H7.10.1:exon:1	int_3744	6	5	1	0	0	4	1	2	A	AUGACUAACCU	20	6	dbr1_1;dbr1_2	1	2	3.66179	3.21664	0.666667	0.6	2.78453	2.84187	GTATGTAAAAAGAGGGATTACGATTGCATAAGTGGTTGAATGATAAACTATTCGTATGACTAACCTACTGAACCAATATTAG	GACUAAC	GACUAAC	20	6		NA	NA	NA	No	YES	No	No	No	NA	NA
I	3466007	3466164	158	-1	SPAC3A11.04	SPAC3A11.04.1:exon:1-SPAC3A11.04.1:three_prime_UTR:1	int_1924	24	16	8	0	0	19	2	2	A;A	CAUGCUGACAU;UUAAGCAAUUA	14;30	23;1	dbr1_1;dbr1_2	0	0	7.58346	7.6303	0.333333	1	2.08095	1.80618	GTATGTTTGAAAATTTATATACGGAAAAGGTTTGAAGAGCGCATGTAGAAATGAATCGTAGCGGTGGAACTTTTAAGCTGCGTTCTGATTTCTCTATGTCTCTTTCTGTTTCGTGCATTTGTTAAGCAATTAGAATCCATGCTGACATACTTTAATAG	UGCUGAC	UGCUGAC	14	23	AAGCAAU	30	1	NA	No	YES	No	No	No	NA	YES
II	3578701	3578818	118	-1	SPBC887.18c	SPBC887.18c.1:exon:4-SPBC887.18c.1:exon:3	int_4166	1	1	0	0	0	1	1	1	A	UUCACUAACCU	10	1	dbr1_1	15	4	2.74077	3.59201	8	2.5	4.22824	4.01808	GTAAGCCTATTCTTTAATAGGTTCTAAGGAAGTATTCAAAAGTGTAACCATTTAATTTTTATTAACGGAAATTTCCTTTTAACCACAATTTGGGTAATATTTTCACTAACCTCATTAG	CACUAAC	CACUAAC	10	1		NA	NA	NA	No	YES	No	No	No	NA	NA
I	2348882	2349007	126	-1	SPAC17G8.04c	SPAC17G8.04c.1:exon:3-SPAC17G8.04c.1:exon:2	int_1669	63	32	31	0	0	33	2	2	A;A	AAUUUUAACUU;GAAUUUUAACU	10;11	62;1	dbr1_1;dbr1_2	120	84	5.32894	5.41794	30.25	21.25	6.54321	6.21894	GTATGTGCAAACTGTACAAACTGCTTAAAGACGGTTTATATCAATTACGTTTTTATTTATTGATTAAATTTACAATTCTTCTTGATTTCATTTTATTATGGTGTAAATGAATTTTAACTTTTTTAG	UUUUAAC	UUUUAAC	10	62		NA	NA	NA	No	YES	No	No	No	NA	NA
I	4415750	4416004	255	1	SPAC29E6.08	SPAC29E6.08.1:exon:1-SPAC29E6.08.1:exon:2	int_883	273	154	118	1	0	62	2	3	A;A	AUUACUAAUAA;UAUUACUAAUA	18;19	270;3	dbr1_1;dbr1_2;wt_1	234	204	10.4983	10.3799	0.611979	0.776515	8.53901	8.18357	GTAAGTCGTGCCTCTTTGGATAGGGAACAAGGCGTATTGCCGTCGCGGTGAGTTCATCGGAAATCTTTTGTATAGACATGGCGTTTGGGTAAGAGCGATTGTTAATGGTTATTTGATTTTTGTTTTGTTTATATTTAACTACCATGTCACGAGATTTCCGAAGGCAATGACCGCAGGGGATGATACGTCTCGTTAACAAAATTTTCCATTGAGTTAGCAAATTAGACCTTATTACTAATAATCCTCTTAAAATAG	UACUAAU	UACUAAU	18	270		NA	NA	NA	No	YES	No	No	No	NA	NA
I	4973031	4973243	213	-1	SPAC1952.04c	SPAC1952.04c.1:exon:2-SPAC1952.04c.1:exon:1	int_2272	64	36	28	0	0	41	2	2	A;A	UUUGCUAAUAC;UUUUGCUAAUA	15;16	53;11	dbr1_1;dbr1_2	7	8	7.22574	7.37138	4	1.5	3.98063	4.04111	GTATGAAATCAATGAATTAGTGTTAAAACAAGTGGATTGAGTACATTGTTTAAATGGCGAAGTGGAAATGGAACAATTGTAGAAACATTTTGTTTTCAGAAATTACGCACTTGTTTTTTATTAAAATTTGTCATTTAAAAATAGTTTCTAGCAGTCTTCTTGTTTTCCTTCTATTCTTTTCATCAGCACTTTTTGCTAATACTTTCTTTTTAG	UGCUAAU	UGCUAAU	15	53		NA	NA	NA	No	YES	No	No	No	NA	NA
I	4861029	4861186	158	-1	SPAC4F10.14c	SPAC4F10.14c.1:exon:2-SPAC4F10.14c.1:exon:1	int_2240	171	103	63	2	3	51	4	4	A;A;A;A	UUAAUUAACUU;CUUAAUUAACU;UUAACUUAUCA;ACUGCUUAAUU	16;17;12;21	163;5;2;1	dbr1_1;dbr1_2;wt_1;wt_2	94	199	8.94745	9.11171	2.11111	6.06061	7.45206	8.04038	GTATGTTCGAATGCATCCCCGTGTTTTGAAGTTGACACCAGCTCTAAGAAATGCCTTGAACGGTTTCAAAGTGGTTCCACTGTAATTGATGCTGGCTATTGAAAACACAGTTGTACTTTTTTCATAGAGAACTGCTTAATTAACTTATCATTGTATAG	AAUUAAC	AAUUAAC	16	163	AACUUAU	12	2	NA	YES	YES	No	No	No	NA	NA
II	735289	735383	95	1	SPBC119.10	SPBC119.10.1:five_prime_UTR:1-SPBC119.10.1:exon:1	int_2475	264	160	104	0	0	95	3	2	A;A;A	UUUAGUAACCA;GUUUAGUAACC;UUUGUUUAGUA	14;15;18	149;113;2	dbr1_1;dbr1_2	163	97	6.95538	6.67487	54.6667	10.8889	9.40141	9.24733	GTAACTATCATTCCAGCTGCGTTGATAAAAATTTTTTATTATCTTCCATTTTTTCCCTCTCCTTCTATTCTTTGTTTAGTAACCATAAATTTTAG	CGUUGAU	UAGUAAC	14	149	UGUUUAG	18	2	NA	No	No	No	No	No	YES	NA
II	731206	731478	273	1	SPBC119.08	SPBC119.08.1:exon:2-SPBC119.08.1:exon:3	int_2473	11	7	4	0	0	10	2	2	A;A	UUUACUAACAU;CUUUACUAACA	9;10	10;1	dbr1_1;dbr1_2	3	6	7.37548	7.21298	4	7	5.42279	5.39461	GTAAGTCTTTTATGCAAAAACGGCTTCCTGTGATTGATTACTCATCATCACCGGGATGTATTAACGAGGTGCATTTTGATGAAAATGCAAATTTTTATACAATGAAAAGTCTTCTATGAGAAATGAGTTCTAATCATCCTTGAAAAGTATTTCCTTTATAAATCTTGATATAATGTTTGGAATTCGGTTGATTAAAAAATTTGAACTGCTCATTGTCTTACATTTGCATAGTGATGTCTTTCCTATTTTTTATAAACTTTACTAACATGGTAG	UACUAAC	UACUAAC	9	10		NA	NA	NA	No	YES	No	No	No	NA	NA
I	5095302	5095547	246	-1	SPAC1250.05	SPAC1250.05.1:exon:2-SPAC1250.05.1:exon:1	int_2302	110	66	43	0	1	46	2	3	A;A	UUUACUAACUG;UUUUACUAACU	12;13	93;17	dbr1_1;dbr1_2;wt_2	110	77	7.7828	7.76918	12.3333	19.5	8.96616	9.01682	GTAAGTAACTAGCTTGTAAGGGTTTTCCTCAACATCGACTTTGACTTAGAAGCGTTTTGAAATTATTTTTACTTTTAAACCATTACATTTAAACTATGCTAATTTTATGACCATCATTTCTTTGAAAGAAAAATATAGCAATTGATGTTGAGAAACACTGTTTAATGGCTAGCTTTTTGAAGCCTTTTTGATTTCGACAGAGATCTTAATTGGGAGTCGAATTTTGTTTTACTAACTGTTTTCAAG	UACUAAC	UACUAAC	12	93		NA	NA	NA	No	YES	No	No	No	NA	NA
I	3352694	3352984	291	1	SPAC26A3.10	SPAC26A3.10.1:exon:2-SPAC26A3.10.1:exon:3	int_691	24	15	9	0	0	19	2	2	A;A	UUUACUAACUU;UUUUACUAACU	16;17	22;2	dbr1_1;dbr1_2	13	11	7.87536	7.97127	1.07692	2	5.03906	5.07655	GTATGATATAAAAGCTAAGAGTATCTGAACATTGAGTAAAATATTAAAATAGACACATTTAATAGTGTCGATTCTTTTGTCAAAAAATAGTTATCACTCTTACATCTATTTATAAGTCCATTCTTTTGAACTGGATAACACAGACTAATGAATGACAATAACTACAAGACAAACAGATATAGTCTATGATTTTATCCAAAAGGAGCAACTGGAGCAAGCCCATTGTGCATTCGTGTTGCTCGAAGATGTTCTTATTTCCATATACGATTTTACTAACTTTGTAAAAATTAG	UACUAAC	UACUAAC	16	22		NA	NA	NA	No	YES	No	No	No	NA	NA
I	2721101	2721201	101	1	SPAPB2B4.05	SPAPB2B4.05.1:exon:1-SPAPB2B4.05.1:exon:2	int_577	26	10	15	0	1	21	1	3	A	UUUGCUCACAU	18	26	dbr1_1;dbr1_2;wt_2	26	23	4.52463	4.56368	13.5	24	5.82158	5.58312	GTATGTAGGTTCGCTAACCATACATTCAGTATATAAATGAAGTATCATTTCTTCCAATCTTGGTATTATTTGAATTTTTGCTCACATTTTTCCCGTTTTAG	CGCUAAC	UGCUCAC	18	26		NA	NA	NA	No	No	No	No	No	NA	NA
I	3843578	3843765	188	1	SPAC4H3.09	SPAC4H3.09.1:exon:1-SPAC4H3.09.1:exon:2	int_808	153	96	57	0	0	59	2	2	A;A	CUCUCUAACCA;UCUCUCUAACC	9;10	130;23	dbr1_1;dbr1_2	40	41	7.32869	6.99841	41	42	5.51793	5.3057	GTATGTTTTGCATTCATTCAGTTGTTTTTTTTCACTCTATGTGTAATTTTGGATCTTAACATTTTTGTTATTTCCAATTTCAAGACTCATTGTAAAAGTCGTCGGCTTGAATTTACGAAAAAATTTTTTAGGTTAATGTTATCTTTGTTTTTTCTCTTTACCCCTATGCATTCTCTCTAACCATTCAG	CUCUAAC	CUCUAAC	9	130		NA	NA	NA	No	YES	No	No	No	NA	NA
I	749996	750112	117	1	SPAC22G7.08	SPAC22G7.08.1:exon:1-SPAC22G7.08.1:exon:2	int_163	49	27	22	0	0	34	2	2	A;A	UACGCUAACUA;GUACGCUAACU	14;15	46;3	dbr1_1;dbr1_2	1	7	0.090096	1.79694	2	8	3.32268	3.08538	GTATGTTTTCTGCCTTTAATTTTTTTAGTTATCTTTTTTTCTTTAAAAAAAAGAATAGAAAAAAATCCTTATTTTTCTAAATATTCAAATATGGTGTACGCTAACTAATGATATTAG	AACUAAU	CGCUAAC	14	46		NA	NA	NA	No	No	No	No	No	NA	NA
III	2012614	2012829	216	1	SPCC1906.01	SPCC1906.01.1:five_prime_UTR:1-SPCC1906.01.1:exon:1	int_4759	57	33	24	0	0	38	4	2	A;A;A;A	CUUACUAACUG;CCUUACUAACU;CAUGACUAACA;AUGACUAACAU	20;21;97;96	50;4;2;1	dbr1_1;dbr1_2	530	366	10.2224	10.1496	106.2	122.333	8.6485	8.34994	GTATGTTCTTTTTTATATTGTTTTCGTTAGTATATGGAAATTGGAGTAGTGAAAGAAAGAACGTGGATTCCTTTTGTGATTTGACGTTTCACTTGATATGCGGTTGCGTGGACATGACTAACATTGAAACCGCATGCTAGAGTGTCCCTTTTTTTCCTTGTTCCATTTTTTTCTCCTCTTGATTATTCCCTTACTAACTGAGGGTTGTCTTTTTAG	UACUAAC	UACUAAC	20	50	GACUAAC	96	1	NA	No	YES	No	No	No	NA	NA
II	715453	715531	79	1	SPBC119.02	SPBC119.02.1:exon:1-SPBC119.02.1:exon:2	int_2467	604	228	373	2	1	101	2	4	A;A	GCAGCUAACAU;UGCAGCUAACA	13;14	555;49	dbr1_1;dbr1_2;wt_1;wt_2	238	184	5.91719	6.1837	4.97917	5	9.73584	9.57504	GTAAGTCGCGGCTGTAATAGTGCCTTGCGCACTGCCAAAATTTTGCTTGCTAGGATTGTGCAGCTAACATGATATATAG	AGCUAAC	AGCUAAC	13	555		NA	NA	NA	No	YES	No	No	No	NA	NA
I	2238905	2239047	143	-1	SPAC18G6.11c	SPAC18G6.11c.1:five_prime_UTR:2-SPAC18G6.11c.1:exon:1	int_1647	43	20	22	0	1	30	2	3	A;A	GAAACUAACUA;UGAAACUAACU	12;13	37;6	dbr1_1;dbr1_2;wt_2	3	6	6.02939	5.77421	0.4	0.411765	4.44561	4.70548	GTAAGGAAATGTTTTATTAATAAGAGAGATATAGCAATGTTTGGTTTTTTAAGCAATTGGGTCAACTTGACTTGAAACAGTTTATTTCCACATTTACTTTACTCTTAAGTTTTGGTTTAACTTTGAAACTAACTATTACAAAG	AACUAAC	AACUAAC	12	37		NA	NA	NA	No	YES	No	No	No	NA	NA
III	554745	554864	120	1	SPCC962.05	SPCC962.05.1:exon:1-SPCC962.05.1:exon:2	int_4479	20	14	6	0	0	19	3	2	A;A;A	CUUUCUAACGC;ACUUUCUAACG;UUGACUUAUUC	10;11;22	9;8;3	dbr1_1;dbr1_2	2	1	2.86091	3.00834	1.5	1	1.6061	1.43849	GTACGAATAAATGAAGAGTTTTTAATTTATACCTCAATTAATTGAAGCTCCTCTTGTGGTTTGCATTATGGACTATCATAATGACCTTTTTTTGACTTATTCACTTTCTAACGCATACAG	UUCUAAC	UUCUAAC	10	9	GACUUAU	22	3	NA	No	YES	No	No	No	NA	NA
I	3709347	3709498	152	-1	SPAC15A10.12c	SPAC15A10.12c.1:exon:2-SPAC15A10.12c.1:exon:1	int_1985	96	54	42	0	0	49	2	2	A;A	CAUUCUAACCA;GCAUUCUAACC	14;15	80;16	dbr1_1;dbr1_2	2	0	5.30747	5.65778	1	0.333333	4.11871	4.13242	GTATGCAAGATAGCCAGACCACTCTTGATAAAACTGTCAATATTTTGAAGACTTATTGAATAAGTTATGACAAATTTCTGATAATAAAAACTGAGTGTTCTTCTTGCTTTTATTAATAATATCGATCAAGGCATTCTAACCATTGCTGCTAG	UUCUAAC	UUCUAAC	14	80		NA	NA	NA	No	YES	No	No	No	NA	NA
III	945860	946140	281	-1	SPCPB16A4.02c	SPCPB16A4.02c.1:exon:2-SPCPB16A4.02c.1:exon:1	int_5080	126	80	46	0	0	49	2	2	A;A	GAUGCUAACAA;GGAUGCUAACA	9;10	110;16	dbr1_1;dbr1_2	16	12	9.09007	8.83836	2.83333	3.25	3.828	4.06323	GTATGTATTCATTAACTTAGTTGTCTGAGTAATATTTACGATACGTTTGAGTGGAAAGGGATTTGGAGTATTCTTTAATTTTGTGAAGTGTACTTAGAAGTGAATGATACGTACTCTTAATTCTTTATTGTTCGCTTTTGATTTGGGGATATGATGATGCAAACAGCACCCTACAAGCACTTTGACCAATTGATTTTCAGAATATTCCAATTATTTGCTTCCCGTTTCAGAGTCAATATTTGCACTCATGGTTTTTTTTGTAGTGGATGCTAACAACCTAG	UGCUAAC	UGCUAAC	9	110		NA	NA	NA	No	YES	No	No	No	NA	NA
II	4120418	4120501	84	-1	SPBC56F2.04	SPBC56F2.04.1:exon:3-SPBC56F2.04.1:exon:2	int_4286	75	28	47	0	0	33	2	2	A;A	UAUGCUAACAA;GUAUGCUAACA	12;13	66;9	dbr1_1;dbr1_2	6	3	4.40943	4.52291	1.16667	1.33333	4.15867	4.37032	GTATGTTCACAATTAATTAGCAAAAACAGATTTAAAGTCTGAAGTGCTTTGACTCCATCTATATGTATGCTAACAATCGTTTAG	UGCUAAC	UGCUAAC	12	66		NA	NA	NA	No	YES	No	No	No	NA	NA
I	3087277	3087383	107	1	SPAC16A10.04	SPAC16A10.04.1:exon:3-SPAC16A10.04.1:exon:4	int_644	50	23	22	0	5	34	2	3	A;A	AUUUCUAACAU;GAUUUCUAACA	12;13	43;7	dbr1_1;dbr1_2;wt_2	53	44	5.07696	5.75872	6.75	7.5	5.70354	5.72742	GTATGCCAATAGATCGAACAATAACTGTTTAAGTGCAGTGTTCATATGATTCATGTACTCAGTTCACTTGAATTATCTAAGTATACTGATTTCTAACATCATGCTAG	UUCUAAC	UUCUAAC	12	43		NA	NA	NA	No	YES	No	No	No	NA	NA
II	3324272	3324386	115	1	SPBC17D11.08	SPBC17D11.08.1:exon:1-SPBC17D11.08.1:exon:2	int_3122	18	10	8	0	0	14	2	2	A;A	GUUACUAACCA;AGUUACUAACC	17;18	15;3	dbr1_1;dbr1_2	92	48	4.57439	4.31366	23.25	16.3333	7.05549	6.84924	GTATGCTAATTGCAAAACCAGGGGAAATATTATATAATTTTATCTGTGCTTCTTTTGGCATAGACTCCAAAGATGTACTCTGTTCTACGAAGTTACTAACCAAAAAATTGTTTAG	UACUAAC	UACUAAC	17	15		NA	NA	NA	No	YES	No	No	No	NA	NA
I	1043790	1044000	211	-1	SPAC23C4.09c	SPAC23C4.09c.1:exon:2-SPAC23C4.09c.1:exon:1	int_1355	63	34	29	0	0	42	3	2	A;A;A	AGAAUUAACAA;AAGAAUUAACA;GAAACUAAUUU	10;11;46	55;7;1	dbr1_1;dbr1_2	156	149	7.16614	6.9091	78.5	150	6.55638	6.65624	GTATGTTCTTAGTTTCGAAACTTGCATATAAACTTCAAAACTCTACGACTGAAAGTTATAATTTTTTATTAGAATTCACTTGAAGGATTATGTTGGTAAATGACGAGATTTAATGAATCATTTTAAAATTACACAAAGGAAATCCGATAGTGAATTTAGAAACTAATTTATTTATATACTCCATTTTTTTTACAAGAATTAACAAATCTAG	AACUAAU	AAUUAAC	10	55	AACUAAU	46	1	NA	No	No	No	No	No	NA	NA
II	2924079	2924232	154	1	SPBC1703.05	SPBC1703.05.1:exon:1-SPBC1703.05.1:exon:2	int_2988	33	20	13	0	0	26	2	2	A;A	CGAACUAACAA;UCGAACUAACA	11;12	27;6	dbr1_1;dbr1_2	105	76	6.1366	5.76683	21.2	11	6.14102	5.96008	GTAAGCACTTTATTTTATCTTTGGGCAGTCATATAGCTTAAATCGTTTTGATCGTACAATGTTTTGTATTTTCTTACTTATTGACACATACGATATGATGCATTCAATTAATTATATTTTGATTTCAATAAGTATTCGAACTAACAAGTTATAG	AACUAAC	AACUAAC	11	27		NA	NA	NA	No	YES	No	No	No	NA	NA
II	3964578	3964662	85	-1	SPBC26H8.07c	SPBC26H8.07c.1:exon:6-SPBC26H8.07c.1:exon:5	int_4246	110	60	50	0	0	43	2	2	A;A	UCUGCUAACCU;AUCUGCUAACC	12;13	104;6	dbr1_1;dbr1_2	326	225	6.61715	6.65879	10.5484	9.41667	7.07148	6.89627	GTATGTTTACTTGGTTTAAAACGTCGTTTGTATATTTAGTTTATTTTTTCTACTTGTTTATGCTCATCTGCTAACCTCGAAATAG	UGCUAAC	UGCUAAC	12	104		NA	NA	NA	No	YES	No	No	No	NA	NA
III	988491	988843	353	1	SPCC1795.05c	SPCC1795.05c.1:five_prime_UTR:1-SPCC1795.05c.1:exon:1	int_4579	30	18	12	0	0	20	4	2	A;A;A;A	UUUACUAAUGU;AUUUACUAAUG;CCAAUUUACUA;UGUGCUCAUUU	11;12;15;52	27;1;1;1	dbr1_1;dbr1_2	149	69	8.2106	8.10011	21.4286	10	6.46295	5.54177	GTATGTAGCGTAAATGTCGAAATTTTTTTCCTCTTCCATTTTAGTGCAAACGGATGCCTTTTTGAAGACTCATGCTGAAAGAAACATGAAAAAGTTAATTCTCCAACACTTTTTTACCCGCTCAAATAGTGTTTCACCTATTTTGCAAATCCTTATTGGTATGGGTTAGTGTGTTTCTGGTTGCGTTGGTTATTGAGACAGTAATTTCATCGTTACATTCTTTAAAAGGTTTTTTTTTTTACGACTGTGACACAAACGCGTAAACATTTGAGAAGAGAAAAAAAAAGGAACTTGTGTGCTCATTTCATTCCTTATTTTATAACCAGCATTCCCAATTTACTAATGTGTTGTAG	UACUAAU	UACUAAU	11	27	UGCUCAU	52	1	NA	No	YES	No	No	No	NA	NA
II	2023987	2024058	72	1	SPBP23A10.12	SPBP23A10.12.1:exon:1-SPBP23A10.12.1:exon:2	int_2784	2	1	1	0	0	2	2	2	A;A	AUCACUAACAA;CAUCACUAACA	12;13	1;1	dbr1_2;dbr1_1	71	39	3.37549	4.08234	9	5	5.18044	5.30981	GTAAGATAAAATGAAATAACTGCTCGAATGTGGTAATTCATATTATATTGTTCATCACTAACAAGAAATCAG	CACUAAC	CACUAAC	12	1		NA	NA	NA	No	YES	No	No	No	NA	NA
I	1653607	1653723	117	-1	SPAC343.08c	SPAC343.08c.1:exon:2-SPAC343.08c.1:exon:1	int_1517	142	77	65	0	0	47	2	2	A;A	UGAACUAAUAA;AUGAACUAAUA	10;11	134;8	dbr1_1;dbr1_2	9	12	6.19162	6.61711	10	6.5	4.43736	4.46394	GTAAGTTAGCGGTAATACCTCGTTTTTGCTTTTTGAAGAACCACAAAGCGATAGTCATTATCTCATTACTTTCTAGATACTGTTTTACAATTTGAATTCATGAACTAATAAATTTAG	AACUAAU	AACUAAU	10	134		NA	NA	NA	No	YES	No	No	No	NA	NA
II	2921313	2921440	128	1	SPBC1703.04	SPBC1703.04.1:exon:1-SPBC1703.04.1:exon:2	int_2985	36	26	10	0	0	19	3	2	A;A;A	ACUUCUAACUA;CUAACUAAUUA;GACUUCUAACU	10;6;11	18;16;2	dbr1_1;dbr1_2	2	1	6.252	6.74411	1.5	0.285714	1.48619	0.903541	GTAAGCTAGTTTATGAATTTATGAAATTGTAGTATTTAGATTACTTTCTGTACCGTATACTGAATGGCGTGAATTGCATGAATTAAACGTAGCTAAAATCTTATTCTGTTGACTTCTAACTAATTAAG	AACUAAU	UUCUAAC	10	18	AACUAAU	6	16	NA	YES	No	No	No	No	NA	NA
III	1281951	1282051	101	-1	SPCC23B6.05c	SPCC23B6.05c.1:exon:3-SPCC23B6.05c.1:exon:2	int_5137	159	87	72	0	0	37	4	2	A;A;A;A	UUAACUAAUUU;AUUAACUAAUU;CCGAUUAACUA;ACCGAUUAACU	17;18;21;22	152;3;2;2	dbr1_1;dbr1_2	152	100	5.53745	5.98637	38.25	50.5	6.29931	6.08645	GTAAGTTGTGTTTATAAAAATAATAAGGAAGTCCTTTGAACTTCTGCTTCTGCTAAGTCCTACATTCTATTGACCGATTAACTAATTTCCTGTTCCTTTAG	AACUAAU	AACUAAU	17	152	GAUUAAC	21	2	NA	No	YES	No	No	No	NA	NA
III	1231360	1231447	88	-1	SPCC645.03c	SPCC645.03c.1:exon:2-SPCC645.03c.1:exon:1	int_5131	79	32	47	0	0	29	2	2	A;A	UCAAUUAACUA;GUCAAUUAACU	14;15	75;4	dbr1_1;dbr1_2	21	12	5.47064	6.5298	7.33333	13	6.22348	6.03113	GTAAGATTTTCTTAATGGCATGACCATGTTTATCGCATGCGTTTTTGCCTGTTGTATTGCTGAGCTGTCAATTAACTAGTTTCTTTAG	AAUUAAC	AAUUAAC	14	75		NA	NA	NA	No	YES	No	No	No	NA	NA
II	1905988	1906383	396	1	SPBP16F5.04	SPBP16F5.04.1:exon:1-SPBP16F5.04.1:exon:2	int_2763	135	79	56	0	0	59	3	2	A;A;A	GAUUCUAACUU;GGAUUCUAACU;UAAAUUAACAU	14;15;270	114;15;6	dbr1_1;dbr1_2	87	64	8.7277	8.67094	22	7.22222	7.22986	7.28499	GTAAGTCCTTTACTATAAACCTGATGGAGACTGAACATGTGATTTAAGTTGTGGATAAGTATGATGTTTCGCATGTTTTATGTATCAACTACTTATTAAAAAATACGCGCTCTTTTTCATAAATTAACATTTGTTCAGCGTAAATAAAGAAAGTAACTCAATAATCCATTCGTTTAGAATGATCATTTAAGAGAAGTGCTTTTATTCATTAGTAATTGATGAATCCTTCGATTTATTGATGAGTAGGAAGAAATTTTATTTAAAAGATCTATCTAAGTTTTTTTTTGGGGGTTTGGTTTCTTTCTTTGAATCGCATGGCAGTACATCCGGGGTGTTCAAGCGCACGTTGATACGTGCTTAGTTTTATTTTTATTGGATTCTAACTTTTTTATGTAG	UUCUAAC	UUCUAAC	14	114	AAUUAAC	270	6	NA	No	YES	No	No	No	NA	NA
I	406169	406267	99	1	SPAC31A2.10	SPAC31A2.10.1:exon:3-SPAC31A2.10.1:exon:4	int_51	21	14	7	0	0	12	2	2	A;A	GAAACUAACUU;UGAAACUAACU	11;12	19;2	dbr1_1;dbr1_2	11	5	5.74613	6.6078	1.2	0.5	3.70563	2.85995	GTAAGTTTCTAATACATCAATACCAAGCTACTGTTTCGTAAAACAATTGACTGTTTAATTCTGTAGTCCGTTATGGTCGATGAAACTAACTTGGAATAG	AACUAAC	AACUAAC	11	19		NA	NA	NA	No	YES	No	No	No	NA	NA
II	2073383	2073466	84	1	SPBC29A3.18	SPBC29A3.18.1:exon:1-SPBC29A3.18.1:exon:2	int_2795	244	108	135	0	1	89	2	3	A;A	AUCAUUAACGG;GAUCAUUAACG	11;12	214;30	dbr1_1;dbr1_2;wt_2	18	8	6.47502	6.58786	3.16667	1.8	3.99697	3.77421	GTAAGTGAAATGTGATGGCTGCTATTCGTGGAAACGGAAGCAAGCATAGCTTTTGACAAAAGAACGATCATTAACGGGGTTTAG	CAUUAAC	CAUUAAC	11	214		NA	NA	NA	No	YES	No	No	No	NA	NA
III	1931217	1931424	208	-1	SPCC74.03c	SPCC74.03c.1:exon:3-SPCC74.03c.1:exon:2	int_5251	52	32	20	0	0	37	1	2	A	UUUGCUGACUG	13	52	dbr1_1;dbr1_2	35	22	7.67927	7.64458	7.2	11.5	4.99511	4.92205	GTAAGTGGTGCGGTTTGCGAGTTTTTGTTACAGTAAATTTCAGAAGTGATGTTGGATTGGTTTGATTTGTCAAAATGTACAAGTTATCCGATTGTCTTTTTTAAAAATAGAAAAAGATAAATTGTTTTTGCATCTGAAATGTTGCTGATGAAGGCTTGTTTACAAATTTGAATGCACGAATTTATGTATTTGCTGACTGTTTTTAAAG	UGCUGAC	UGCUGAC	13	52		NA	NA	NA	No	YES	No	No	No	NA	NA
II	1088575	1088689	115	-1	SPBC1734.14c	SPBC1734.14c.1:exon:2-SPBC1734.14c.1:exon:1	int_3599	97	58	39	0	0	45	2	2	A;A	AAUGCUAAUCG;AAAUGCUAAUC	13;14	82;15	dbr1_1;dbr1_2	95	74	6.98532	6.84971	7.38462	6.81818	7.81946	7.49582	GTATGATGATATTGTTAAAGAAACTGCCATACTTTGGGAATTCTCTAGGTTCTTTGTTTTCCCCTAAAACGAGACTCTTGTATCTTATTTGAGCAAATGCTAATCGATGAAATAG	UGCUAAU	UGCUAAU	13	82		NA	NA	NA	No	YES	No	No	No	NA	NA
III	2267271	2267707	437	-1	SPCC1840.05c	SPCC1840.05c.1:exon:3-SPCC1840.05c.1:exon:2	int_5329	58	31	27	0	0	30	3	2	A;A;A	UUUACUAAUGU;AUUUACUAAUG;UUCAUUUACUA	12;13;16	52;3;3	dbr1_1;dbr1_2	81	61	8.30747	8.11921	13.6667	10.3333	5.61531	5.43464	GTATGTTTTTATTACAAAAGAAGAAAAAATTGAGATTGTTAAGAGATATTTCGCAAGTTGAAGTGGATTGAAAGAGAACGCTAAATAATGCCTCTTTCTTAATAAAGAATTCTCAGTGCTACAGCCGGTAGCTTAAACTACTTTATTGTGTTTTCCTTGATTAGAGTCGAAGTGATATACTTGATCATCGGTCACTTTCCTTACTGCGTATACTAATTTATTGTGATGATCATATTGGTCATATTTCAGAAAGAGTTTTTCGTTCTTCTTCTTCTTTTCTATCTGTTTTGGTCTTTTTTGCTTGGAATGTTATATAACGTGCTTGTACGAAATTGGTTTAAGTGTAATTAGATTTTCAGCTTGCGATTGTTCTCTCTATACATCTTAATGTTTTAACAT…	UACUAAU	UACUAAU	12	52	CAUUUAC	16	3	NA	No	YES	No	No	No	NA	NA
I	1593781	1593869	89	-1	SPAC23H4.08	SPAC23H4.08.1:exon:4-SPAC23H4.08.1:exon:3	int_1495	34	21	13	0	0	26	2	2	A;A	UUAACUAACAU;CUUAACUAACA	10;11	27;7	dbr1_1;dbr1_2	25	10	2.60019	3.71513	13	3.66667	3.3094	2.73049	GTATGTCAACATCAAATAGAGTCAATTACTTAGTTCTGTTGTTATAAGAACTGGCTCTTGGCTTTTTTTACCTTAACTAACATTCATAG	AACUAAC	AACUAAC	10	27		NA	NA	NA	No	YES	No	No	No	NA	NA
I	4874437	4874604	168	1	SPAC4F10.20	SPAC4F10.20.1:exon:2-SPAC4F10.20.1:exon:3	int_1005	125	61	64	0	0	59	3	2	A;A;A	GAUAUUAACUC;UGAUAUUAACU;AGUUUGAACGC	14;15;98	118;6;1	dbr1_1;dbr1_2	635	596	8.92201	8.87396	106	66.3333	9.1494	9.4029	GTACGTTTGCTTAGTAAAGTAATCGTTGCATAAGGGCGTGTATTTGTCACACTGGCTTACCATAGTTTGAACGCTTGTATTTTTGTTTTAACAAATTACACTTCCATATGCCTAGAACCGACTACTTAATTTTTTTTGTTAAGCAGTGATATTAACTCTTAATTTTAG	UCUUAAU	UAUUAAC	14	118	UUUGAAC	98	1	NA	No	No	No	No	No	NA	NA
II	3110463	3110579	117	1	SPBC1778.07	SPBC1778.07.1:exon:1-SPBC1778.07.1:exon:2	int_3043	95	46	49	0	0	58	2	2	A;A	GCUUCUAACAU;AGCUUCUAACA	11;12	84;11	dbr1_1;dbr1_2	60	53	5.04428	5.06372	4.69231	18	5.63599	5.52676	GTAGGTACACTTGATACTATCAATCAAAAATAGCATGATTTATTATTTATCTGATTACATGTTTTCTAACTTCTTTCTAAATTTGGATTTTTGGACATAGCTTCTAACATTTAATAG	UUCUAAC	UUCUAAC	11	84		NA	NA	NA	No	YES	No	No	No	NA	NA
III	1040358	1040602	245	1	SPCC1259.03	SPCC1259.03.1:exon:1-SPCC1259.03.1:exon:2	int_4593	18	11	7	0	0	15	2	2	A;A	CAUACUAACAA;CCAUACUAACA	14;15	14;4	dbr1_1;dbr1_2	72	72	8.86301	8.48972	6.63636	6.63636	5.54454	5.56218	GTATGTAACTTATTTTTGTCTATTCTTTTCGAATCCTTTTTTTCATGTTGGTTGTCATTCTTCTTTCCTTTTAGGCTTTGTATCATTTGGAAAACTTTTTTTTTTTTAAGAATGCATTAGGAGAGTCTAATCAAGGAACTTTTTTGTATCATATATCCAGTGAATTGAAAAATCGGCACAGTCAGGCAAAGGACTTTATCATAGTCCTTTTTTGGGTTTATTGCCATACTAACAAAGTTTTGTAG	UACUAAC	UACUAAC	14	14		NA	NA	NA	No	YES	No	No	No	NA	NA
III	495613	495672	60	-1	SPCC970.09	SPCC970.09.1:exon:2-SPCC970.09.1:exon:1	int_4957	4	1	3	0	0	3	1	2	A	UUUACUAACGA	13	4	dbr1_1;dbr1_2	15	9	3.27595	3.56776	16	10	4.82752	4.79283	GTATGTTGCGTGAATAAGTGAAGATTGGAGGATGTTTGAATTTACTAACGAATGGTTAAG	UACUAAC	UACUAAC	13	4		NA	NA	NA	No	YES	No	No	No	NA	NA
II	3788650	3788724	75	-1	SPBC31F10.17c	SPBC31F10.17c.1:exon:2-SPBC31F10.17c.1:exon:1	int_4215	36	22	13	0	1	22	2	3	A;A	UGUACUAAUUG;UUGUACUAAUU	12;13	28;8	dbr1_1;dbr1_2;wt_2	11	6	5.02931	4.19337	2.4	7	3.32681	3.07548	GTATGTAGCCGGGATGTATTTTCAAATACGTTGATGGGTTGTAGGAAATTCTTTGTTGTACTAATTGCTATGTAG	UACUAAU	UACUAAU	12	28		NA	NA	NA	No	YES	No	No	No	NA	NA
III	506493	506653	161	-1	SPCC970.05	SPCC970.05.1:exon:2-SPCC970.05.1:exon:1	int_4959	44	19	25	0	0	36	4	2	A;A;A;A	UAUUCUAACAA;UUAUUCUAACA;UAUUCUUAUUC;AAAGCUUAGUA	12;13;18;107	29;8;5;2	dbr1_1;dbr1_2	831	797	12.1695	12.1622	55.4667	57	10.4831	10.3607	GTATGTAAAATTTTGTTCTGTTACTGTACATGCTCGTAGAGAGCTTCAAAGCTTAGTATACTCAAATTCACTTGTGGTATTTTGAGACTCGGAGCTATGAATACTGTAATGGGATATTATGTTTTGTTATTGAATTTATTCTTATTCTAACAACTTTTTAG	UUCUAAC	UUCUAAC	12	29	UUCUUAU	18	5	NA	No	YES	No	No	No	NA	NA
II	2492148	2492219	72	1	SPBC557.04	SPBC557.04.1:exon:1-SPBC557.04.1:exon:2	int_2903	50	25	25	0	0	31	2	2	A;A	UUUACUAACAU;UUUUACUAACA	14;15	46;4	dbr1_1;dbr1_2	22	7	4.33484	4.02094	2.09091	1	5.49393	5.1648	GTATAATTTTTGGGTTGGATGGATCGAGGAGTATTACAATGAAAGATTTATTTTACTAACATTTTTCATTAG	UACUAAC	UACUAAC	14	46		NA	NA	NA	No	YES	No	No	No	NA	NA
II	501397	501684	288	1	SPBC1685.16	SPBC1685.16.1:exon:1-SPBC1685.16.1:exon:2	int_2432	9	9	0	0	0	6	1	1	A	UUUAUUAACUC	12	9	dbr1_1	10	6	9.30162	9.28731	5.5	1.4	5.43438	5.11208	GTAAGAAGTTTGCTACTGATTGGAGTGAATCATCTATATATCGAGGTATAGCAATTATGTTCCCATTTAAAGTCTTGTGTTATGATCAGTAGCTTGTTTTTACTTCGTTTCATTTTCGTTTAGAGATATGGAAAAGTATATGTGATTGTCTTTCTTGCAACCAATCAAGGTAGCGCTGTTTAGGCCTTGTCTTCAGCTGCACATGGACAATCTGGAATTGGGATCAGTTGCTTGTATTATATTTTCATACTCCTTCCTTTAACAAAAGTTTTATTAACTCTCAATTAG	UACUGAU	UAUUAAC	12	9		NA	NA	NA	No	No	No	No	No	NA	NA
I	190585	190729	145	1	SPAC13G6.09	SPAC13G6.09.1:exon:1-SPAC13G6.09.1:exon:2	int_9	43	24	19	0	0	31	2	2	A;A	UGUACUAACUU;UUGUACUAACU	17;18	37;6	dbr1_1;dbr1_2	121	74	6.22348	6.4122	40.6667	37.5	6.06544	6.2705	GTAAGTTAAACATTTATTAGTAAATCGTTTTATATTAGACGACTTGATGTCAAAAAAATTATTGGATTTCGGACCTAATATGTTTTTTGAAATCACATTGTAAACCAGCATTTATCTTAATTGTACTAACTTTACATTTACTTAG	UACUAAC	UACUAAC	17	37		NA	NA	NA	No	YES	No	No	No	NA	NA
II	635545	635733	189	-1	SPBC115.03	SPBC115.03.1:five_prime_UTR:2-SPBC115.03.1:exon:1	int_3505	30	15	15	0	0	21	1	2	A	UAUGCUUACAC	13	30	dbr1_1;dbr1_2	35	21	5.65245	5.91884	36	5.5	4.86091	4.63488	GTATGTCTAAAATCAAAGTTCGTAAAATAGACTGATTTCAAACATTTTCTTTCAAGTATTCACATGAATGCATTTTAGCATATGTTTAGCTAAATGATGATTATGTTTGATAAATGGATCCCTTCATTCGGTTAAAATTTTATAATTACCGATTATTAATATCTGATCATATGCTTACACTGTCGTTAG	AUCUGAU	UGCUUAC	13	30		NA	NA	NA	No	No	No	No	No	NA	NA
III	389413	389533	121	-1	SPCC1682.09c	SPCC1682.09c.1:exon:2-SPCC1682.09c.1:exon:1	int_4931	47	19	28	0	0	29	2	2	A;A	UUUACUAACAU;CUUUACUAACA	10;11	45;2	dbr1_1;dbr1_2	65	51	6.9841	7.38143	5.5	5.2	6.68215	6.6899	GTATGTTGTAGAGTACTTATACTGGTAGTTTAAAGCGTACGTTTTTTCCAAGCCTTGATGGCGGAATTAATGTATCGCAGTTGGCTTCAGTATACTCGTTCATCTTTACTAACATGTTCAG	UACUAAC	UACUAAC	10	45		NA	NA	NA	No	YES	No	No	No	NA	NA
II	3709385	3709755	371	1	SPBC19F5.04	SPBC19F5.04.1:exon:1-SPBC19F5.04.1:exon:2	int_3228	137	86	51	0	0	60	3	2	A;A;A	AUUACUAAAUA;AAUUACUAAAU;UUACUAAAUAA	14;15;13	114;22;1	dbr1_1;dbr1_2	62	35	9.56898	9.35994	1.8	1.33333	6.39686	6.30627	GTGAGTATTTTGTTTACAGTTTATATGATGGTTCGAGGAGTATGGTCATCGTCTGAATCTAGCAGGTTCAAAAATATTTAAGAAGTCAAGAGAACTTTTTCCTGAATGTGCGTTAGATTGGAGTTTTCATGCTAGAATGCCCGAAATTATTTAAAAATAAGATATTTCATGTGTTGAATTATGCTTGGGAATATTGGCTAATTAGGTTTTTTTGAATCGAATTCAAAATGAGAGAAAGGAGATAAAAGAGGTTTTGGTTACTCTTTCCACTTTCTATCGATATGAGACTTATATATTTAAATGCTTACTCCTCTACAAACTGTCGACCATTTTAGACCGTTAAATTACAAATTACTAAATAATTTATTTAG	GGCUAAU	UACUAAA	14	114		NA	NA	NA	No	No	No	No	No	YES	NA
I	4393573	4393717	145	-1	SPAC30.02c	SPAC30.02c.1:exon:2-SPAC30.02c.1:exon:1	int_2137	29	16	13	0	0	16	2	2	A;A	GUAACUAAUUU;GGUAACUAAUU	11;12	28;1	dbr1_1;dbr1_2	3	7	6.17286	6.20164	4	2.66667	5.44978	5.57027	GTATGTTTAAATAGTTATCTTTAATGATTTAGTTTTTGGAAATTAGCCAATTCATTTTTGGCTTCAGATTGTGCCCAGCTACTCTAGATGATGGGAGAATCCGTATATGCAATTTTTCGTAATTCTGGTAACTAATTTGTCTTAG	AACUAAU	AACUAAU	11	28		NA	NA	NA	No	YES	No	No	No	NA	NA
I	4872573	4872685	113	-1	SPAC4F10.19c	SPAC4F10.19c.1:exon:2-SPAC4F10.19c.1:exon:1	int_2245	70	40	30	0	0	31	2	2	A;A	AAUACUAAUAU;AAAUACUAAUA	15;16	69;1	dbr1_1;dbr1_2	17	10	5.53259	6.22216	3	1.22222	3.67078	2.9626	GTATGTGCTTGTAAGCTCAGAACAATGCATTTTGTTTCAATACACATTAACCCATGAACCAATGCTTTATTCTTTTTTTCTGTTTCCTAAAAATACTAATATAGAATTAATAG	UACUAAU	UACUAAU	15	69		NA	NA	NA	No	YES	No	No	No	NA	NA
I	1030722	1030810	89	1	SPAC139.06	SPAC139.06.1:exon:3-SPAC139.06.1:exon:4	int_228	18	8	10	0	0	12	1	2	A	UUGGCUAAUAA	21	18	dbr1_1;dbr1_2	5	1	2.48472	3.651	3	2	6.61472	6.55785	GTATGTTCGATTACCTTTCAATTGGAGAAGTATTCAATTATTGAATATCCCTATATGTTCTTTGGCTAATAATCGTAATGTATTAATAG	GGCUAAU	GGCUAAU	21	18		NA	NA	NA	No	YES	No	No	No	NA	NA
I	2721644	2721747	104	1	SPAPB2B4.05	SPAPB2B4.05.1:exon:4-SPAPB2B4.05.1:exon:5	int_580	82	55	27	0	0	43	2	2	A;A	AGAUCUAACAU;AAGAUCUAACA	15;16	75;7	dbr1_1;dbr1_2	21	25	5.86487	5.39312	7.33333	26	4.93939	4.84418	GTATGTCTTTCCTGTTATCATCACTTGATTATCTAATGGATCTATCGGTTTCCGTGTGACACCTTTTTTTATGAGTTTGTTAAGATCTAACATTTTCTTTTTAG	AUCUAAC	AUCUAAC	15	75		NA	NA	NA	No	YES	No	No	No	NA	NA
I	2123357	2123451	95	1	SPAC20H4.07	SPAC20H4.07.1:exon:1-SPAC20H4.07.1:exon:2	int_441	14	9	5	0	0	9	1	2	A	AUUACUGACAG	10	14	dbr1_1;dbr1_2	14	19	6.45668	6.06323	15	10	2.55811	2.28245	GTAAGCGTTTAGTAGTTCAATAAGCTTGCACATAAAAAAAAAATATTGGGTTTTTGTACCGGGATCTTAAAAGACGGAATTACTGACAGCTTTAG	UACUGAC	UACUGAC	10	14		NA	NA	NA	No	YES	No	No	No	NA	NA
III	1917223	1917344	122	-1	SPCC737.09c	SPCC737.09c.1:exon:2-SPCC737.09c.1:exon:1	int_5246	7	5	2	0	0	5	2	2	A;A	AUUGCUAAUUU;UAUUGCUAAUU	13;14	5;2	dbr1_1;dbr1_2	61	43	3.87101	3.90649	62	44	5.11483	4.84295	GTACGTATTTCAAGCATTTTTCTTAAAAAATATATATATATATATATATAAGTATATTTTGAAAGAAAAATGTTTATGTTTAATTGTTTAACCTCGCTTCATATTGCTAATTTCATTTTTAG	UGCUAAU	UGCUAAU	13	5		NA	NA	NA	No	YES	No	No	No	NA	NA
II	3761295	3761551	257	-1	SPBC31F10.06c	SPBC31F10.06c.1:exon:3-SPBC31F10.06c.1:exon:2	int_4208	82	48	34	0	0	32	2	2	A;A	UUUACUAAUUU;UUUUACUAAUU	12;13	80;2	dbr1_1;dbr1_2	341	348	9.8257	9.1252	42.75	12.4643	7.45242	7.62411	GTATGTAGTCACAGAGTTGTTTTTCTAAATCATGGAGATTTTGTAAGAGTTGGAATGTCTTTAGAATAATTAATTTTTTTTCGCTTAAAATTCTTTTTTGTATAAAGTTGTTTGAATTTCTATATCGTCTCATATGTCGTTGGCTAGTTTATCAGTGGGCCGTTTTGTTCTCATGATCTTTGTTTTTTCTTTGCAATTTCTTCTATGATTTTGGATTCTCTATCTGATTTTATGTATTTTTACTAATTTTCTTATAG	UACUAAU	UACUAAU	12	80		NA	NA	NA	No	YES	No	No	No	NA	NA
III	2060153	2060314	162	1	SPCC1739.14	SPCC1739.14.1:exon:1-SPCC1739.14.1:exon:2	int_4773	8	4	4	0	0	7	1	2	A	AUUAUUAACUC	11	8	dbr1_1;dbr1_2	46	34	5.00142	4.98566	23.5	11.6667	5.13845	4.89903	GTAAGTTGATATTAGATTGAACGTTGTGTCGAGTGACAACAAGATTAGAAATATTTCATTACTTAACAGTATACGTTTATTAAATTGCTTTGGCACTCTTGTCTTCTATTCCTTTTTTCTGCTATATATGCCTGAATTTGAATAATTATTAACTCAATCTAG	UAUUAAC	UAUUAAC	11	8		NA	NA	NA	No	YES	No	No	No	NA	NA
I	5018273	5018392	120	1	SPAC890.08	SPAC890.08.1:exon:1-SPAC890.08.1:exon:2	int_1050	150	102	48	0	0	79	3	2	A;A;A	CCUACUAACUG;UCCUACUAACU;CAGUCCUACUA	16;17;20	121;28;1	dbr1_1;dbr1_2	1249	1022	8.31722	8.32836	178.571	170.5	10.2341	10.1706	GTAAGTAAAAAAATAAGTGAGATTAGTATAAAAGTCTTTATATTTCGTATTCATGGCTACAATATTTCCTCCTTTCTTCCTTTCTCAAAATTTCAGTCCTACTAACTGTATTTTTTATAG	UACUAAC	UACUAAC	16	121	GUCCUAC	20	1	NA	No	YES	No	No	No	NA	YES
I	3151626	3151788	163	1	SPAC3G9.13c	SPAC3G9.13c.1:exon:1-SPAC3G9.13c.1:exon:2	int_658	61	27	34	0	0	26	2	2	A;A	AAAGCUAAUUA;AAAAGCUAAUU	10;11	57;4	dbr1_1;dbr1_2	2	4	5.78164	6.47844	0.75	1.66667	2.61592	2.6969	GTAAGTATTTTATTAATTTAACCAGATTGCATGAACTTGCACGCGTCAAGTCGGTTGAGGTAGTTATATTCTTCGTAAGCCGATTTTTTTTTGGCTAAAGCTTCGATTTATGCAAAATTGTTTCCAATATTTTAAATTATAAAGAAAAAGCTAATTATTCAAG	AGCUAAU	AGCUAAU	10	57		NA	NA	NA	No	YES	No	No	No	NA	NA
II	413654	413893	240	1	SPBC106.18	SPBC106.18.1:exon:1-SPBC106.18.1:exon:2	int_2412	197	115	82	0	0	71	2	2	A;A	UUUGCUAACUU;AUUUGCUAACU	16;17	172;25	dbr1_1;dbr1_2	14188	12846	10.9264	10.772	141.89	225.386	12.0743	12.1622	GTATGTTTTATGAATTTTCACGGAAAAAACGTCTCAGGTTCATTACAGTGTCCAAACATGGTGTCGTCAAAAGTTCAGTGTATGGCATGATTTGCTAAGTAAATTACTTTTTACATTTGTAACAGAATATTACTTAAATTATTGCTGGATTTCCCGATACACTTTTTTATGGAGCTTAAGAACTTCGGTCTTTCCAAATATTTTTTAGATAAGAATATTTGCTAACTTATATCTTTATAG	UGCUAAC	UGCUAAC	16	172		NA	NA	NA	No	YES	No	No	No	NA	NA
II	4345100	4345225	126	-1	SPBC16C6.08c	SPBC16C6.08c.1:exon:3-SPBC16C6.08c.1:exon:2	int_4340	52	32	19	0	1	23	2	3	A;A	GAUGCUAAUAA;UGAUGCUAAUA	12;13	51;1	dbr1_1;dbr1_2;wt_2	367	311	6.62221	6.62076	23	34.6667	8.06354	8.1084	GTAAGTAATTACGCTACTGTTTTTTTTTGGAAAGCCAATGTTCGTATGGTATAACAGTATCTGTTATGAACCGTTTTTGTAGACGTTCTATAGTGCGTTATTGAAGTGATGCTAATAATGTGGTAG	UGCUAAU	UGCUAAU	12	51		NA	NA	NA	No	YES	No	No	No	NA	NA
II	3685151	3685231	81	-1	SPBP8B7.24c	SPBP8B7.24c.1:exon:2-SPBP8B7.24c.1:exon:1	int_4195	150	76	74	0	0	48	2	2	A;A	UAGGCUAAUUA;GUAGGCUAAUU	12;13	136;14	dbr1_1;dbr1_2	37	25	7.86536	8.30186	1.80952	3.71429	6.07592	5.92603	GTATGTGTCAAAAACTTATAGAAGTTGTTTTTTGGACAGCATTGTAGAATACCTGGAACTAGTAGGCTAATTAATAATCAG	GGCUAAU	GGCUAAU	12	136		NA	NA	NA	No	YES	No	No	No	NA	NA
I	4055873	4055963	91	-1	SPAC19G12.07c	SPAC19G12.07c.1:exon:2-SPAC19G12.07c.1:exon:1	int_2084	16	8	8	0	0	13	2	2	A;A	UUUACUAACCC;UUUUACUAACC	13;14	14;2	dbr1_1;dbr1_2	3	0	4.42228	5.04215	2	1	3.31659	3.13892	GTACGTTTACAATTTTTTTCCTTCCTTCCCGCCTTTTCCCTTTGTTTTTTTGTCTTCCCGTGTTTATTGTTTTTACTAACCCTTTTCCTAG	UACUAAC	UACUAAC	13	14		NA	NA	NA	No	YES	No	No	No	NA	NA
I	692726	692848	123	1	SPAC22F3.15	SPAC22F3.15.1:exon:1-SPAC22F3.15.1:exon:2	int_118	22	15	7	0	0	13	1	2	A	GACGCUAACAA	10	22	dbr1_1;dbr1_2	5	10	5.54149	6.1171	2	2.75	1.76305	2.60235	GTACGTTGGAAATAAAACGTGACGGTCTACATGTTAAATTGCATCAGTGTTCAAGCAATGTGAAGAGGCTGTCAGAACTATGTTATCTATGTTTGTAGATGAATATGACGCTAACAAGCTTAG	CGCUAAC	CGCUAAC	10	22		NA	NA	NA	No	YES	No	No	No	NA	NA
I	1225937	1226038	102	1	SPAC10F6.10	SPAC10F6.10.1:exon:2-SPAC10F6.10.1:exon:3	int_275	13	9	4	0	0	11	3	2	A;A;A	AGUACUGACAA;UAAUAGUACUG;GUUUAAUAGUA	10;14;17	11;1;1	dbr1_1;dbr1_2	21	16	7.35052	7.39575	5.5	5.66667	4.09865	4.18187	GTAAGTGTAATATAGTTTAACTGCTCATAGGTTTTAGAACTCGAGGTCTTTTGATCCTTCACACTTTTACATTTTCATGTTTAATAGTACTGACAAATAAAG	UACUGAC	UACUGAC	10	11	UUAAUAG	17	1	NA	No	YES	No	No	No	NA	NA
III	308092	308291	200	-1	SPCC553.02	SPCC553.02.1:exon:3-SPCC553.02.1:exon:2	int_4915	11	10	1	0	0	11	2	2	A;A	UCUAUUAACAA;UUCUAUUAACA	13;14	9;2	dbr1_1;dbr1_2	13	20	6.01703	5.91219	4.66667	10.5	6.31652	6.46058	GTATGTAATAGAAATGGATTTAAATGTTGCAAGTGTATCAGTGAATAAGCTAAAGTTTAAACTTCATGAAGGATAGCCATGGTCAAGTTTACTGAGTGCGACTTCGGTTGAGTTTATTCATCTTCTTGCAATATTGAAACTTGTATTTTACCTTGATATTAATTTTATGCACTGTAACTTTCTATTAACAAACGCATTAG	UAUUAAC	UAUUAAC	13	9		NA	NA	NA	No	YES	No	No	No	NA	NA
II	1756043	1756265	223	-1	SPBC1D7.01	SPBC1D7.01.1:exon:3-SPBC1D7.01.1:exon:2	int_3716	116	81	35	0	0	41	2	2	A;A	UUUACUGACCC;CUGUUUUACUG	14;18	115;1	dbr1_1;dbr1_2	5	3	10.2326	9.98404	1.5	0.8	2.10247	2.24989	GTAAGTTTTCTACTGTTAGAATTGACGTTTGGAAAAGTAAATGGAGAAAGGATTTCTTTGATGATTCCAAAAAAGCATAGTTCAACTGAGCATCGTATGCTGAAACTTTTTCCATCTGATTTGCACGTCAGTCTGAGATTTCTCGTTCCCTTTTGTTTCTTTCTTTTTCAACGTCTGTTTGTCTGACTTTTGTGTTGGCTGTTTTACTGACCCATACTTTAAG	UACUGAC	UACUGAC	14	115	GUUUUAC	18	1	NA	No	YES	No	No	No	NA	NA
III	2406624	2406754	131	1	SPCP1E11.08	SPCP1E11.08.1:exon:2-SPCP1E11.08.1:exon:3	int_4870	47	26	21	0	0	38	2	2	A;A	GUUACUAACUC;UGUUACUAACU	10;11	31;16	dbr1_1;dbr1_2	79	64	6.80967	6.94221	20	13	6.06851	6.10026	GTATGTCATGAGTTATTGCTAATAAAAATTTCAGTGAAGTGGTGAAGTTGAGATGTCTGATTTGATTGTTTAAACGTCATGTCGTACATTGATTTAAAAAAGTTTTTAAAGTCTGTTACTAACTCTATCAG	UACUAAC	UACUAAC	10	31		NA	NA	NA	No	YES	No	No	No	NA	NA
I	5144035	5144327	293	1	SPAC29A4.02c	SPAC29A4.02c.1:exon:1-SPAC29A4.02c.1:exon:2	int_1072	86	39	44	1	2	30	3	4	A;A;A	UUUACUAAUUG;UUUUACUAAUU;CUGAAUAAUCU	14;15;121	81;4;1	dbr1_1;dbr1_2;wt_2;wt_1	2206	1710	10.1623	10.1704	15.7643	8.86528	10.5038	10.4152	GTAAGTAGCAAAATCCTGTAAACTCCATGTTGACGATAATATCGTATGGTGCTTCGAACTTCTTCAGAGAGTAGTCAATGTTACGGTACTTTGTAACTTTGTATGATGATACTATTTTTTTTTACAGTTATCCCTGTCTAAAGCATAGTGTTGAGAATGGTAAATCTGAATAATCTTGTTAATATGAAGAAAGGAAAAAGCCCACGATATTAATTTATCCAAATAGATTTTTTGAATAACGAAATAATTTCTTTTGTTGATCATTGACCTGTTTTACTAATTGTCAATTTTAG	UACUAAU	UACUAAU	14	81	GAAUAAU	121	1	NA	No	YES	No	No	No	NA	YES
I	4723509	4723637	129	1	SPAC17D4.01	SPAC17D4.01.1:exon:2-SPAC17D4.01.1:exon:3	int_968	130	74	56	0	0	55	2	2	A;A	UUAUCUAACGU;UUUAUCUAACG	14;15	121;9	dbr1_1;dbr1_2	273	232	7.86011	8.08443	24.9091	58.25	8.3836	8.53979	GTAAGTAATTGTGCGATTACTGCTCTTCATTATTAGACTTTTGCACAAAACACTTTTAACCATTAGTTATTATGATGAAAACAGTCTCTAAATCCTACGAAATGAAATTTATCTAACGTTAAATACTAG	AUCUAAC	AUCUAAC	14	121		NA	NA	NA	No	YES	No	No	No	NA	NA
III	932113	932394	282	1	SPCC24B10.18	SPCC24B10.18.1:exon:1-SPCC24B10.18.1:exon:2	int_4574	19	14	5	0	0	15	2	2	A;A	AUUACUAACCU;CAUUACUAACC	14;15	17;2	dbr1_1;dbr1_2	20	16	8.55842	8.42181	7	4.25	5.13517	4.97542	GTATGTCAGCTGCAACTGTCAAATATTCGGTGATCTTTGTATGCTAGGGAATTTGGTTTAGGGATGTTTCTTTTAATATTTTAAGCTCATTGAAGTTGTTGGACAACCTTTGTGGTGCTATAAACTCTTCATCTTTTCGTAACTTTAGATACTCATTATAGTAAAATTTTTCATTAAATTTTTTGATACACGTTTCAATCATTTTACTCTTAAGCATACAAGATATCATATTATATGGTTTATCATTCATCATTAATACTCATTACTAACCTTGACTTTTAG	UACUAAC	UACUAAC	14	17		NA	NA	NA	No	YES	No	No	No	NA	NA
II	2184099	2184222	124	-1	SPBC17G9.08c	SPBC17G9.08c.1:exon:4-SPBC17G9.08c.1:exon:3	int_3818	107	64	42	0	1	50	2	3	A;A	AUUACUAACUU;UAUUACUAACU	13;14	92;15	dbr1_1;dbr1_2;wt_2	11	12	4.42129	4.32781	3	2.6	5.85979	5.78096	GTATGTCTTTGGTTATGATTGAAATAAGAAGTCTAAAAAAATGATGGTTTTCTTTTCCTTTATTAGAATCTCTTTTTTCAGAAATGATTTTTACTTTTAGCGGTATTACTAACTTTTGATTCAG	UACUAAC	UACUAAC	13	92		NA	NA	NA	No	YES	No	No	No	NA	NA
I	3667171	3667313	143	1	SPAC8C9.14	SPAC8C9.14.1:exon:4-SPAC8C9.14.1:exon:5	int_757	398	226	172	0	0	91	3	2	A;A;A	UAUACUAAUCA;UUAUACUAAUC;CUAUUAUACUA	17;18;21	357;33;8	dbr1_1;dbr1_2	23	23	9.00025	9.12856	4	4.8	6.58359	6.42403	GTATGTCATATGGGTTAAGGATTTAGGGGCTTCATACTTGTTGAATAGGTTTGAGAAACAAACTTGTCTTCATTCCATCATACTTGTAAAAAAGCCATCCCTCCTTTTAGAATTTCTATTATACTAATCATTCTCTTCTTTAG	UACUAAU	UACUAAU	17	357	AUUAUAC	21	8	NA	No	YES	No	No	No	NA	NA
II	2239249	2239361	113	1	SPBC15C4.02	SPBC15C4.02.1:exon:1-SPBC15C4.02.1:exon:2	int_2823	29	22	7	0	0	14	1	2	A	UUUUCUAAUGU	16	29	dbr1_1;dbr1_2	16	20	5.37548	6.03694	8.5	21	4.34032	4.28659	GTAAGTTAGATTGACTTCGATGAGGTTTTGACACCTTTTATCCCTGCTCTGGATATTCTACGATGATTCTCATAAATTATATTCCTTTCATTTTCTAATGTATAATTATTTAG	UUCUAAU	UUCUAAU	16	29		NA	NA	NA	No	YES	No	No	No	NA	NA
I	2280767	2280859	93	1	SPAC4G9.14	SPAC4G9.14.1:exon:2-SPAC4G9.14.1:exon:3	int_480	50	29	21	0	0	29	2	2	A;A	GAUACUAACAU;AGAUACUAACA	14;15	48;2	dbr1_1;dbr1_2	13	13	4.85869	5.12814	14	14	5.90882	5.54129	GTACGTTAAAGGTTTGCATTACTTTGAAACCTTATAAAGTGAACCTTGTTATTTCTCCCTCTTTCTATGCAAGATACTAACATAATTGAACAG	UACUAAC	UACUAAC	14	48		NA	NA	NA	No	YES	No	No	No	NA	NA
I	3643369	3643633	265	1	SPAC8C9.03	SPAC8C9.03.1:exon:1-SPAC8C9.03.1:exon:2	int_742	88	62	25	1	0	52	3	3	A;A;A	CAUGUUAACAA;UCAUGUUAACA;AAAUUUUACCC	17;18;41	76;11;1	dbr1_1;dbr1_2;wt_1	28	27	10.3722	10.2445	2.63636	4	5.08234	4.80249	GTAAGTAGATGCTTCTGGATAGCTATGTTTAGTGGAGAGGAAAAGTAAATGATGGTCAATATGGGTTCTTTTTTGTGGTTTTTTACTTTGTTTTGCTCTATAGTAAGTATTTTCTAAATTTAGTCAGCAAACAGCAATTATGATTCCTGGCTGTTAATAATTCCACAAAGTTGTTTAAGGACCCTGTACCCATTTAATCTCCCACTCTATACTACACAAATTTTACCCTTTTTTGTTTTATCATGTTAACAAATTTCTCTTTTAG	UGUUAAC	UGUUAAC	17	76	AUUUUAC	41	1	NA	No	YES	No	No	No	NA	NA
I	2759293	2759478	186	-1	SPAC6F6.19	SPAC6F6.19.1:exon:2-SPAC6F6.19.1:exon:1	int_1771	16	13	3	0	0	15	2	2	A;A	UUAUCUAACCA;UUUAUCUAACC	10;11	14;2	dbr1_1;dbr1_2	40	38	4.68182	5.08234	8.2	7.8	4.89878	5.11017	GTAAGTATCGAGGAAACAAAGGATCATTAAATCTGATGTTCAACCATCGCAAGCCTTGCATCACAAGAATTTATTTGGTGACCGGCCTATTAGTATTATTCGTTCATCCACAACTTAAGCTCTACAATTAGGTTGGAGAAATTTCGCATTTTTGTTTCACTATTGAATTTTATCTAACCATTGTAG	AUCUAAC	AUCUAAC	10	14		NA	NA	NA	No	YES	No	No	No	NA	NA
II	2466573	2466650	78	1	SPBC12C2.05c	SPBC12C2.05c.1:exon:4-SPBC12C2.05c.1:exon:5	int_2898	59	32	27	0	0	32	2	2	A;A	CAGGCUAAUUU;ACAGGCUAAUU	9;10	47;12	dbr1_1;dbr1_2	7	2	4.21937	3.62982	4	3	2.26398	2.20787	GTATGTAAAATATTGGAACCTGTCAAGCAATTGAAGTTAGATGGATATTGAATTCCTGTTCACAGGCTAATTTTATAG	GGCUAAU	GGCUAAU	9	47		NA	NA	NA	No	YES	No	No	No	NA	NA
I	3523645	3523924	280	-1	SPAC16E8.12c	SPAC16E8.12c.1:five_prime_UTR:2-SPAC16E8.12c.1:exon:3	int_1942	125	80	45	0	0	59	2	2	A;A	AUGAUUAACAU;AAUGAUUAACA	10;11	117;8	dbr1_1;dbr1_2	2	1	8.18284	8.16919	0.130435	0.08	3.6206	3.59048	GTAAGTGATAGTGGCATTATAGATTGGGATTTTTTGCTTGAACAACTGTGAAGGTTTTGATAATAAACAAAAAAATGAAAGATTACTAGTGAAACCGTTCTGGTGTTGATTTTCTTTGTTAATGTTTAATCAATCTGCTTAGGACTTGTTTGAACCTTGAATATGTTATTCAAAAGGACTTGAACGCTACTGAGGCTTATAATAAGTTTATGTTGTTCTTATCAAAACTTGCCTATCTAGAGCTTGCCTTTTTCTGATTTAAAATGATTAACATGTTCAG	UUCUGAU	GAUUAAC	10	117		NA	NA	NA	No	No	No	No	No	NA	NA
I	2430460	2430543	84	-1	SPAC6B12.10c	SPAC6B12.10c.1:exon:2-SPAC6B12.10c.1:exon:1	int_1695	12	4	8	0	0	10	1	2	A	UUCUCUAACAA	15	12	dbr1_1;dbr1_2	79	96	4.89006	5.15762	2.5	5.70588	5.63368	5.92549	GTAAGTGTGAATACTGAACAATCTTAACTATGGACTCGATTGAGCCTCTAAAATAATGAAAATTCTCTAACAATTTTCTTATAG	CUCUAAC	CUCUAAC	15	12		NA	NA	NA	No	YES	No	No	No	NA	NA
II	3686364	3686456	93	1	SPBP8B7.25	SPBP8B7.25.1:exon:1-SPBP8B7.25.1:exon:2	int_3222	57	34	23	0	0	31	3	2	A;A;A	AAUACUAAUUU;UUUGCUAAUAC;UAAUACUAAUU	10;16;11	41;14;2	dbr1_1;dbr1_2	122	94	4.56425	3.772	41	31.6667	8.66412	8.68129	GTAAGAATTCATATTGTAGTTGTATATGTTTTATAAAAGTGACTATTTGTTTTCTTTTTCCTTTTTTTTGTTTGCTAATACTAATTTTATCAG	UACUAAU	UACUAAU	10	41	UGCUAAU	16	14	NA	No	YES	No	No	No	NA	NA
I	3187723	3187810	88	-1	SPAC1486.02c	SPAC1486.02c.1:exon:3-SPAC1486.02c.1:exon:2	int_1864	25	14	11	0	0	16	2	2	A;A	UUUGCUAACCC;AUUUGCUAACC	10;11	23;2	dbr1_1;dbr1_2	2	2	1.91606	3.11476	3	3	2.26001	1.96686	GTAAGTAATATCTGTACTAAACAAACCTTCGGTTTTCCAAGAGTTTGATATAATTGTTTTATTAGAATGCATTTGCTAACCCAAAAAG	UGCUAAC	UGCUAAC	10	23		NA	NA	NA	No	YES	No	No	No	NA	NA
III	1974979	1975120	142	1	SPCC18.10	SPCC18.10.1:exon:2-SPCC18.10.1:exon:3	int_4751	63	38	25	0	0	31	2	2	A;A	UCACCUAACCG;UUCACCUAACC	13;14	58;5	dbr1_1;dbr1_2	17	15	6.652	6.52318	3.6	4	5.30774	5.30851	GTAAGTAAAAAGATTTCCATCGAGCCAAGCGTTGAAAAGTTATTCTAAATCTGACAAAAAAAACATTGCAAAAACTTTTTGGGCAAAGAATTTGCGATATACGCTTTTAAAAATTCTGAATTTCACCTAACCGAATGAACAG	ACCUAAC	ACCUAAC	13	58		NA	NA	NA	No	YES	No	No	No	NA	NA
I	5051780	5051976	197	-1	SPAC22E12.16c	SPAC22E12.16c.1:exon:4-SPAC22E12.16c.1:exon:3	int_2294	60	42	18	0	0	35	2	2	A;A	AUCUCUAAUAU;CAUCUCUAAUA	14;15	53;7	dbr1_1;dbr1_2	3	3	7.32329	7.27887	0.190476	0.2	2.58293	3.06739	GTACGTTTATTTCGATAAATAAAGAAAAATTTTTGGGGGGAAGGAAAGTACCAAAAAGTCGAGCTCATAAGTCAGTGAAAGCCGAGTATATGACTCATATGCCTATTTCATAATTTAATGACTCTCTTACCTTTTGATTTTCTTTCCTTCAAACGTTTATTCCGTTGTGTTCGTGCATCTCTAATATCATACTGTAG	CUCUAAU	CUCUAAU	14	53		NA	NA	NA	No	YES	No	No	No	NA	NA
I	1300481	1300633	153	-1	SPAC1565.06c	SPAC1565.06c.1:exon:3-SPAC1565.06c.1:exon:2	int_1416	47	28	19	0	0	33	4	2	A;A;A;A	GUUACUAACGC;AGUUACUAACG;AUCUCUAACUU;UAUCUCUAACU	10;11;22;23	30;10;6;1	dbr1_1;dbr1_2	18	11	7.20821	7.55202	3.16667	1.33333	4.19262	3.97542	GTATGAGTTCTTTCGTTCCGATATACGTTTATGCACGTCCGGGTTGTTTTGATTTTGTTTTTAGAACCGATAACCTCTGTTCGTGGCTAAACTTCATTAGATTACTTTTTATCGTACTCAGTATATCTCTAACTTAGTTACTAACGCTTTCAG	UACUAAC	UACUAAC	10	30	CUCUAAC	22	6	NA	No	YES	No	No	No	NA	NA
II	1123247	1123384	138	1	SPBC1709.12	SPBC1709.12.1:exon:1-SPBC1709.12.1:exon:2	int_2556	6	5	1	0	0	6	2	2	A;A	CAUACUAACUG;UCAUACUAACU	12;13	4;2	dbr1_1;dbr1_2	10	9	4.53375	4.86256	11	10	3.56813	3.82678	GTATGTTTACATTTTGTGCAGCTACGTGAATCAAAGTGGTGATGCTTAAATTATCTTTTTTTTTGGCACTACTATTGTTTTGATTGAATGATAAATCATTCGTTTATTTTGAGGTTTTTCATACTAACTGCAATACAG	UACUAAC	UACUAAC	12	4		NA	NA	NA	No	YES	No	No	No	NA	NA
I	2445969	2446051	83	1	SPAC32A11.01	SPAC32A11.01.1:exon:2-SPAC32A11.01.1:exon:3	int_531	168	83	84	1	0	61	4	3	A;A;A;A	GUUCUUAACCU;UAACCUAAAUG;UGUUCUUAACC;UUAACCUAAAU	14;9;15;10	140;20;7;1	dbr1_1;dbr1_2;wt_1	0	1	4.358	5.31463	0.5	0.5	2.76114	2.90293	GTAAGTCTTGTGTTTTCTGAAATTATGGTACCTCACATGGTATCAAAATCTTCTCTGGTTTTGTTCTTAACCTAAATGTATAG	UCUUAAC	UCUUAAC	14	140	ACCUAAA	9	20	NA	YES	YES	No	No	No	NA	NA
III	2154848	2154999	152	-1	SPCC1620.06c	SPCC1620.06c.1:exon:2-SPCC1620.06c.1:exon:1	int_5300	96	57	38	1	0	53	3	3	A;A;A	UGAACUAACUA;AUGAACUAACU;CUAACUAAAAA	19;20;15	75;20;1	dbr1_1;dbr1_2;wt_1	135	109	9.92643	9.77086	6.18182	9.16667	6.5441	6.51398	GTATGAGTTGGTTCGGTAGCTCTACGATAAAATTTGAGGGTTTCGTAGAGCTGGTGAAAAATGTGAAAGAAACGCTCCTGTAGTCTGGGAATTGATGGGCGTTTGGTGAATTTCATGAATAGTTAATGAACTAACTAAAAATTTGTAAATAG	AACUAAC	AACUAAC	19	75	AACUAAA	15	1	NA	YES	YES	No	No	No	NA	NA
I	31914	32162	249	-1	SPAC977.18	SPAC977.18.1:exon:2-SPAC977.18.1:exon:1	int_1136	5	3	2	0	0	4	1	2	A	UUUGCUAAUGC	21	5	dbr1_1;dbr1_2	0	0	-16.6096	-16.6096	1	1	-16.6096	-16.6096	GTATGAAATTAGTGAAAGAGAATTAAATCATGCTGTTTGGGGACAATATTAAAATGGTGAAGTTATAATGAAACAGTTGTTGGAAGCGATTAGTTTCAAAAATTAGCGACTCGTATTTTGTTTATTATTATTATTATTTTTTCTTTTTTTTTTATTCGCTGTTTTAAAATTGTTTCCAGCAATCTTCTTCCTGTTCTCTTTTTATCCGTTTGACAACACATTTTGCTAATGCTTTTTTTTTTTTTTTAG	UGCUAAU	UGCUAAU	21	5		NA	NA	NA	No	YES	No	No	No	NA	NA
II	3250333	3250425	93	-1	SPBC25H2.14	SPBC25H2.14.1:exon:6-SPBC25H2.14.1:exon:5	int_4071	25	6	19	0	0	16	2	2	A;A	UUCACUAACAU;UUUCACUAACA	12;13	22;3	dbr1_1;dbr1_2	14	22	4.12173	3.6517	7.5	7.66667	3.95325	4.45919	GTAGGCCAATTTTGTTTTTCTATCATCGTTTAGCTCTTTTTATGACGATGTCTATAATGATGATTACTAGAAATTTCACTAACATAATGATAG	CACUAAC	CACUAAC	12	22		NA	NA	NA	No	YES	No	No	No	NA	NA
II	2307687	2307930	244	1	SPBC12D12.03	SPBC12D12.03.1:exon:3-SPBC12D12.03.1:exon:4	int_2850	13	6	7	0	0	12	2	2	A;A	CUAUCUAACUU;UCUAUCUAACU	11;12	11;2	dbr1_1;dbr1_2	113	109	5.02971	5.51135	22.8	22	7.09897	7.25226	GTATGTTAAAGACCTCGTGAAGAAAAGAAAATTTTAGACAATAATGGGGGATATTGGCCTTTAACCAATATTTATTGATTTGATACGCTAGTGTTGTAATCTTCTCGCATTTAAGGAAATCTTAATTGGCAGGGAAGAGTCAACCTTATATTGTGAATCGAATTAATAAGTATTCCTGCCATTATAGTTCATCTTTTATTATATTTTTTCTTACTTTCTTTTATTTCTATCTAACTTGTATTAG	AUCUAAC	AUCUAAC	11	11		NA	NA	NA	No	YES	No	No	No	NA	NA
II	730926	731025	100	1	SPBC119.08	SPBC119.08.1:exon:1-SPBC119.08.1:exon:2	int_2472	227	129	98	0	0	96	2	2	A;A	AAAACUAACAU;GAAAACUAACA	11;12	204;23	dbr1_1;dbr1_2	42	25	8.55021	8.56647	14.3333	6.5	6.4564	6.23739	GTATGAGATATTTGGGTAACTGCTGCATTTGCAAAACATTTTGTTTACTTGACAGAAAATCGCATCTGCTTGAACTTTTAGGAAAACTAACATAGTTTAG	AACUAAC	AACUAAC	11	204		NA	NA	NA	No	YES	No	No	No	NA	NA
I	942297	942450	154	1	SPAC1687.21	SPAC1687.21.1:exon:1-SPAC1687.21.1:exon:2	int_203	56	29	27	0	0	24	1	2	A	UUUACUUACCA	16	56	dbr1_1;dbr1_2	250	177	7.02458	6.94741	41.8333	35.6	7.92783	7.71063	GTAAGTTTTAATACCTATAAGTGATTGTTTTTCTGAGCATATGTTTAAAGCTTGTCACATCATACAGAGAGTGTTTGTTTAGCATACTCAATTTTCATTTCTAGACGGATGATCAACTATGATGATATCAATTTACTTACCATCTTAATTGCAG	UCUUAAU	UACUUAC	16	56		NA	NA	NA	No	No	No	No	No	NA	NA
I	1881479	1881829	351	-1	SPAPB1A10.10c	SPAPB1A10.10c.1:exon:2-SPAPB1A10.10c.1:exon:1	int_1573	122	72	50	0	0	46	2	2	A;A	UUUGUUAACAU;AUUUGUUAACA	15;16	115;7	dbr1_1;dbr1_2	12	11	6.83305	6.99824	6.5	12	4.13845	4.39549	GTATGTTAATGCTAGGGGAGTTGCTGATGTGGTCGACGTATCGTACAGACGAGCTTTTTTAAGCATTACCCTCGAATTCAACCATTGATGGTGTAGTGGTTATCAATTGAAGCGTTAAATTTTATACGTTCAGTATATTTTTCTTTTTGGTTTTTGTATTGAGCTGTAAAATCCAATACTGCAATTTCCCATTGATTTTATGTCGATAAGTTGTTATTTGTCGCTACAAGGTGATTGCTTTTAAAATTTATTCACTTTGTTATTAAATACTAGCTCAAATATGGTTAACGATCTTTACATCAGCTTCTCTATGAGTATTGCTTTGGCAATTTGTTAACATCGTCATTTTAG	UGCUGAU	UGUUAAC	15	115		NA	NA	NA	No	No	No	No	No	NA	NA
I	1135777	1135931	155	-1	SPAC56F8.05c	SPAC56F8.05c.1:exon:2-SPAC56F8.05c.1:exon:1	int_1381	49	31	18	0	0	29	2	2	A;A	CUUAUUAACAG;UCUUAUUAACA	14;15	46;3	dbr1_1;dbr1_2	276	212	8.13691	7.7575	138.5	106.5	8.24395	8.24879	GTAAGATGCATTTGTTATATTGTATTGCTGTTTAAATCTTCAGTTAGTATTTGCGTTTTTATTACCCGCAGCCGTGATTTTATTTTTAAAGTGATCGTTTTAGTTGATTTATTCATTCCGATAAACAAGAATATCTTATTAACAGTTTATGTTAG	UAUUAAC	UAUUAAC	14	46		NA	NA	NA	No	YES	No	No	No	NA	NA
III	2289094	2289194	101	-1	SPCC965.04c	SPCC965.04c.1:exon:2-SPCC965.04c.1:exon:1	int_5333	24	9	14	1	0	17	2	3	A;A	AUUACUAACUC;AAUUACUAACU	19;20	19;5	dbr1_1;dbr1_2;wt_1	21	13	6.51169	7.16391	22	14	3.1797	2.95214	GTAAGTATTTTAGACATCGCGTATGTATGGTACAAAACGCGATGTAGATAAGCTTAAGGAAGCTGGTCATAAATAATTACTAACTCATTACTTGACGATAG	UACUAAC	UACUAAC	19	19		NA	NA	NA	No	YES	No	No	No	NA	NA
III	749213	749478	266	1	SPCC14G10.04	SPCC14G10.04.1:exon:3-SPCC14G10.04.1:exon:4	int_4533	86	44	42	0	0	28	2	2	A;A	CUUACUAACGU;CCUUACUAACG	10;11	85;1	dbr1_1;dbr1_2	187	156	9.41988	9.53979	12.5333	15.7	7.52408	7.59759	GTAAGTCATTTTGTTTACTATTTTCTGTCGACTGTTAACATAAAAAATTGTCTGTATTGACTATGAATCCTTACAATGCACGTTCAAAAAGATGCGGCAAAAATGTCATATGGTTGTTTACTACAGGATTGATTATAATGTGAATCCATTCTACCTTTTTCTGCATCAGATATGAGGTCGATGTGGAATTCGTGTTTTTGACGTTGCTTCCTTGACATTGTCGATAGATTCCGTCTCTTTGTTGAAATCCTTACTAACGTTTCTAG	UACUAAC	UACUAAC	10	85		NA	NA	NA	No	YES	No	No	No	NA	NA
I	3722809	3722998	190	1	SPAC15E1.03	SPAC15E1.03.1:exon:1-SPAC15E1.03.1:exon:2	int_778	334	170	163	0	1	94	3	3	A;A;A	UCUACUAACAA;AUCUACUAACA;UUCAUCUACUA	13;14;17	310;23;1	dbr1_1;dbr1_2;wt_2	59	68	11.8964	11.6766	1.5	2.37931	9.98115	10.0844	GTATGTCGAAGAATGCTGATAACGAGTGGATTGGATTTAGACGAATTTGTAAAAGAGTTTTTGCCGTGGTTGAATACCTCTCAAATCCAGAAAAAAAATTTTGCAAAGCGCTTTTATGAATTGTCTTTTGTTGAGTTTCATCCTTATTATCGATCATTTTCTTTATTTCATCTACTAACAATCATTTTAG	UACUAAC	UACUAAC	13	310	CAUCUAC	17	1	NA	No	YES	No	No	No	NA	YES
III	930948	931077	130	1	SPCC24B10.17	SPCC24B10.17.1:exon:2-SPCC24B10.17.1:exon:3	int_4573	74	45	29	0	0	30	2	2	A;A	UUAACUAACAA;CUUAACUAACA	13;14	66;8	dbr1_1;dbr1_2	36	31	7.96967	7.85438	4.625	5.33333	4.85147	5.08964	GTATGTGTTATCTTTTTGTTTTCTGGCATCAAAGCCTGGCATTATGGTCGTCATTTCCCATGTCGTCTAATTGTTTGATGGTTGAGCCGGAAACAGCTAGATGTACAATCTTAACTAACAACATCAATAG	AACUAAC	AACUAAC	13	66		NA	NA	NA	No	YES	No	No	No	NA	NA
II	4008820	4008936	117	-1	SPBC3B9.13c	SPBC3B9.13c.1:exon:3-SPBC3B9.13c.1:exon:2	int_4265	9	5	4	0	0	8	2	2	A;A	GGUACUAACUU;AGGUACUAACU	12;13	7;2	dbr1_1;dbr1_2	1580	966	5.35061	5.57829	40.5385	22.4884	10.8728	10.8313	GTAAGTATAAAATAGCGGTAGTAATTACTACAACTAGTGTTAAGTTATTTTTACTCATTATTTATTCCTTACTATATTGTTATTTTATTACGCAATTAGGTACTAACTTTTTTATAG	UACUAAC	UACUAAC	12	7		NA	NA	NA	No	YES	No	No	No	NA	NA
I	906145	906287	143	-1	SPAC1687.03c	SPAC1687.03c.1:exon:2-SPAC1687.03c.1:exon:1	int_1315	16	7	9	0	0	9	1	2	A	UAUGCUGAUCU	16	16	dbr1_1;dbr1_2	54	30	5.83767	5.91682	55	31	5.54541	5.14535	GTATGTATATATTATGAGCAATTAAAACGTCCTTTATGAAGGTTTTAGTGTTCAGCTATTACGATTGCTTCTTGGTGACTCAGGCATCTTTTCATAATTTAAAGGTTCAATATAATATAGTATGCTGATCTATAAACTTATAG	UGCUGAU	UGCUGAU	16	16		NA	NA	NA	No	YES	No	No	No	NA	NA
II	343850	344021	172	-1	SPBC1271.12	SPBC1271.12.1:exon:3-SPBC1271.12.1:exon:2	int_3417	112	67	45	0	0	43	2	2	A;A	AAGGCUAACAA;AAAGGCUAACA	14;15	108;4	dbr1_1;dbr1_2	566	376	7.24154	7.2097	9.45	5.8	8.31561	7.94395	GTAAGTCAAGTTTATATCCATCATTCGGGTTCCGCGCGGTTAAGTGAATGGAAAGTGAAAGTCAATTATTTTTCGAAACTATGCAAGGCATTTTTTAAGCTGAAATGCCTTCTCCTCCATTTTAATGTTTTCTGTTCTCTTTCGATATGGAAAGGCTAACAACTGTATTTAG	GGCUAAC	GGCUAAC	14	108		NA	NA	NA	No	YES	No	No	No	NA	NA
II	1334496	1334606	111	1	SPBC27B12.07	SPBC27B12.07.1:exon:1-SPBC27B12.07.1:exon:2	int_2621	38	21	16	1	0	25	2	3	A;A	AUAGCUAACUU;CAUAGCUAACU	10;11	35;3	dbr1_1;dbr1_2;wt_1	16	10	4.16603	3.68024	8.5	5.5	4.11592	3.76258	GTACGTATGATTTATTAAGCTACAGAATCCTTCCGTCTTTAAATTTATCTTTAATTATAGATTGACGGTTTTTTTTGCTTTCAAATGAACTGTCATAGCTAACTTGTATAG	AGCUAAC	AGCUAAC	10	35		NA	NA	NA	No	YES	No	No	No	NA	NA
II	771576	771755	180	1	SPBC577.11	SPBC577.11.1:exon:1-SPBC577.11.1:exon:2	int_2495	22	10	12	0	0	20	3	2	A;A;A	GACUCUAAUAC;AAUGCUAACAA;AAAUGCUAACA	97;12;13	17;3;2	dbr1_1;dbr1_2	46	33	9.35073	9.57792	7.83333	8.5	7.5177	7.11772	GTAAGTTCTTACAAGTGTTGGATAGTGGTTTGTAAAATGGTTCCAAAATTTACCTCTGTATATACAACGTACTGGAGACTCTAATACCATAAAATAGGAATAACATTAGTCCTTTGATAACTTGAGAAATCGATTTTTCAACCTATTCATCCATCGCACTAAATGCTAACAACAGCTTAG	UGCUAAC	CUCUAAU	97	17	UGCUAAC	12	3	NA	YES	No	No	No	No	NA	NA
II	2162257	2162485	229	-1	SPBC1711.15c	SPBC1711.15c.1:five_prime_UTR:2-SPBC1711.15c.1:exon:1	int_3812	151	98	53	0	0	77	6	2	A;A;A;A;A;A	CAUACUAACAG;GCAUACUAACA;AAGCUUAACAU;UUUGCUCAUUG;ACAUUUUAUAU;GAAGCUUAACA	11;12;159;22;152;160	115;16;10;6;2;2	dbr1_1;dbr1_2	10	15	10.1833	9.93793	0.6875	1.23077	5.95666	5.2332	GTAGGTATTCAAAAATGAAAGAAACTGAAAATTCCTTGAATTCTATTGTGATGACAAAAGAAGAAGCTTAACATTTTATATAGGAAGTGCCGTCTGAGAGTTCTGCTCGGTGACCAAGCTAATTCATTCTGAGAAATCTTTGTAAACTCAAGGGGTTTTAGTATTCAATCATTTGGGCTTTCATAAGTCTATCAACAGTTTTTGCTCATTGCATACTAACAGCGTTTAG	UACUAAC	UACUAAC	11	115	GCUUAAC	159	10	NA	No	YES	No	No	No	NA	NA
I	3461584	3461765	182	-1	SPAC3A11.06	SPAC3A11.06.1:exon:2-SPAC3A11.06.1:exon:1	int_1921	23	15	7	1	0	19	2	3	A;A	GAUGCUAACCU;UGAUGCUAACC	31;32	20;3	dbr1_1;dbr1_2;wt_1	19	10	4.56813	4.75942	2.22222	1.83333	4.66046	4.00572	GTTAGTAAAAGTTTTGTTCTTCTGTTTTTTCCTTCTCAATTAATAGTTAATTTTACGGATCGATGCATTCTATCATTGATTTGTTTCTTTAGCTTGATTTTTTTTTTTTTCATCTTTCTTGCTTTTTTACTTACTTACTGTAATGATGCTAACCTTTTTCTTTTTCTTTTTTTTGTCTATAG	UGCUAAC	UGCUAAC	31	20		NA	NA	NA	No	YES	No	No	No	NA	NA
II	1286316	1286447	132	1	SPBC3D6.09	SPBC3D6.09.1:exon:1-SPBC3D6.09.1:exon:2	int_2606	15	10	5	0	0	12	1	2	A	AAGACUAACGU	11	15	dbr1_1;dbr1_2	2	1	6.51597	6.19276	3	0.666667	4.31248	4.25637	GTATGTAATCTATATAACTATATAACCATATTGAAGGGCTTGTATGATGAAAGAATTTATTATATAATTGCCAATTTTATTTTCTTCTGGAAACACTTTGTATATGAATGAATAAAGACTAACGTTACTTAG	GACUAAC	GACUAAC	11	15		NA	NA	NA	No	YES	No	No	No	NA	NA
II	2343001	2343095	95	-1	SPBC24C6.10c	SPBC24C6.10c.1:exon:3-SPBC24C6.10c.1:exon:2	int_3843	22	9	13	0	0	17	2	2	A;A	GACGCUAACAU;UGACGCUAACA	14;15	18;4	dbr1_1;dbr1_2	36	20	5.10941	4.85233	18.5	10.5	4.17581	3.46763	GTATGCAATTTATTCATAATTGTAAACTTGAATGTGCCTGGGATTCATTATCCTGGCTAAATAGTATTCCCGTTGACGCTAACATTTGGTGACAG	CGCUAAC	CGCUAAC	14	18		NA	NA	NA	No	YES	No	No	No	NA	NA
III	2113159	2113333	175	-1	SPCC576.17c	SPCC576.17c.1:exon:2-SPCC576.17c.1:exon:1	int_5281	7	5	2	0	0	6	2	2	A;A	UUCACUAACAA;UUUCACUAACA	18;19	6;1	dbr1_1;dbr1_2	2	6	2.83117	2.30355	1.5	2.33333	1.48177	1.70647	GTATGCAGGGCGTTTGACTATTGATTTAGAGGTTGCGCTAGTACCAGAGGATCCTTGGTCGAGTCCTATAGAAAAATTATTTTTTCCCTCTTTCACTTTTTCTTATAAAAAAAAAAAAAAAAAAAAAAGGATGTTGCTCATGAAGGCATTTTCACTAACAAATTCTTTTCTTTAG	CACUAAC	CACUAAC	18	6		NA	NA	NA	No	YES	No	No	No	NA	NA
I	3730179	3730493	315	1	SPAC15E1.08	SPAC15E1.08.1:exon:2-SPAC15E1.08.1:exon:3	int_781	22	12	10	0	0	17	2	2	A;A	GAUACUAACUA;AGAUACUAACU	17;18	18;4	dbr1_1;dbr1_2	34	18	7.1193	7.21828	17.5	6.33333	5.8503	5.65243	GTAAGTGTTAATTGAGAGCGAAGTAGATTACGGATATATCCAAGGAGGAGCTAGAGGGAAATCTTAAGCTTTTTTGCAGTTGTTATCGATGATTATTCCAATATGTATATATTTTATTTTGTGCAAGACTTGGTCTGCTAATACTTTGAATTGTTCATTTGGTGAGTTGGTTTTTTCCTTGCAACAATTCATTTTTTTTACCTAATTTGTTTTCGACAATGTTTCCTTCCTGCTGATTCCTTGATATTTTCGGTCCATTCCTTAAACAAAATTTTTTTAAAAAAAGTAAAAGATACTAACTACTTAAATGAACAG	UACUAAC	UACUAAC	17	18		NA	NA	NA	No	YES	No	No	No	NA	NA
II	616164	616315	152	-1	SPBC839.08c	SPBC839.08c.1:exon:2-SPBC839.08c.1:exon:1	int_3497	80	44	36	0	0	52	2	2	A;A	UUUACUAACCA;UUUUACUAACC	16;17	61;19	dbr1_1;dbr1_2	50	17	7.38495	7.50948	51	18	5.46397	4.65858	GTAAGTAAACATTTGTAATAGTGAAATTAGTGTATAGAGCTTAATGAAAAAAATGTCATATTTTCGTTTTGGATTTAGAAAAAAAAACAAGAAATAGTACAACTTTTTTCTTGTCCTTCTTTTTCTTATTTTACTAACCAATATGCTTATAG	UACUAAC	UACUAAC	16	61		NA	NA	NA	No	YES	No	No	No	NA	NA
II	2318252	2318333	82	-1	SPBC12D12.07c	SPBC12D12.07c.1:exon:2-SPBC12D12.07c.1:exon:1	int_3838	57	31	25	1	0	31	2	3	A;A	CUUGCUAAUUG;CCUUGCUAAUU	11;12	46;11	dbr1_1;dbr1_2;wt_1	88	64	3.82529	4.06463	89	21.6667	5.61111	5.60792	GTATGTATAGTCAATAATATATCATAGTAAAAAATAAAAGATAAAACTTTTTCGAATAGATCTCCTTGCTAATTGCTACTAG	UGCUAAU	UGCUAAU	11	46		NA	NA	NA	No	YES	No	No	No	NA	NA
II	2507023	2507116	94	1	SPBC365.06	SPBC365.06.1:exon:1-SPBC365.06.1:exon:2	int_2907	30	17	13	0	0	20	2	2	A;A	GAAGCUAACUU;UGAAGCUAACU	11;12	26;4	dbr1_1;dbr1_2	173	141	5.95018	5.50503	17.4	23.6667	6.31529	6.45067	GTGTGTGCTACAGCAAGAGACTTTCATGCTATTCCTGTCATCTTTTGCTTTCAAAAGTCTTTAATGCACGAATCGTGAAGCTAACTTGATGTAG	AGCUAAC	AGCUAAC	11	26		NA	NA	NA	No	YES	No	No	No	NA	NA
II	4086056	4086150	95	-1	SPBC1347.13c	SPBC1347.13c.1:exon:2-SPBC1347.13c.1:exon:1	int_4284	5	3	2	0	0	5	2	2	A;A	CUCACUAACAU;UCUCACUAACA	9;10	3;2	dbr1_1;dbr1_2	6	4	3.32919	3.41937	3.5	1.66667	5.7204	5.63536	GTACGTTTTCTGAGAATTTTTGTGGTCCATAACCCTTTACGATTTTACAAGACACCGAAAATGCACTTGTGTTTGTATTCTCACTAACATGTTAG	CACUAAC	CACUAAC	9	3		NA	NA	NA	No	YES	No	No	No	NA	NA
II	943220	943360	141	1	SPBC646.11	SPBC646.11.1:exon:3-SPBC646.11.1:exon:4	int_2523	54	39	15	0	0	16	2	2	A;A	UGUACUAACUU;GUGUACUAACU	13;14	53;1	dbr1_1;dbr1_2	77	57	7.71369	7.12394	5.57143	5.27273	6.08973	5.81705	GTAAGTGATTAAGAACACATTAACTGCAAATGCTTTTTTCTTTCTTTCCTTTTTTGATAATTTTGGAATTTTTTTGACTACTTTAGGTCTCATGTTGCTTTTAATAATGAGTATTGAGTTGTGTACTAACTTTATTGGTAG	UACUAAC	UACUAAC	13	53		NA	NA	NA	No	YES	No	No	No	NA	NA
III	508321	508776	456	1	SPCC970.04c	SPCC970.04c.1:exon:1-SPCC970.04c.1:exon:2	int_4473	20	12	8	0	0	16	2	2	A;A	UUUUCUAACUC;AUUUUCUAACU	16;17	19;1	dbr1_1;dbr1_2	7	2	8.24693	8.21865	1.14286	1	2.62996	2.15395	GTATGTTGCTTTGTTTTTTGCAGTTTCGCGTCAGCAGAAGAATGATGGAGGTATTGGTTACTGGACAAGTGTTTTTAAATTTGACCAAAGCACTGTCTTTATCATCATTTTCCTTTGAGGGAAGATTCTTGACGGATTACTTTGCTAGGTTTCTTTGAATTGCATGACATGAATAGGAGGAAATTGAAGTGAACGTTCGATGGTACTAGGAAATTATACTTTGAGATAATTAGAAACCCAGGAATCTAGCTTCAAATTTTAAAAACCATAAATTTCAATCTTTTTATTATTATTATTATTTTTGTTTTTTCATCGTTCAACAAAAATTTCTTCTTTTTTTCCGGATACGTAATCCGTTCTGTCAACAACTTGTCTTGTGCTAACCGTTACAACTCTTTG…	UUCUAAC	UUCUAAC	16	19		NA	NA	NA	No	YES	No	No	No	NA	NA
I	3567639	3567740	102	-1	SPAC17A2.07c	SPAC17A2.07c.1:exon:2-SPAC17A2.07c.1:exon:1	int_1958	26	14	12	0	0	18	2	2	A;A	UAUAUUAACAG;AUAUAUUAACA	13;14	24;2	dbr1_1;dbr1_2	20	13	4.98846	5.06096	5.25	7	4.10048	3.95789	GTATGTATACTATCGATTAACCTTTTGAATAAATTTAAAAGGGAAAGCGAATTCTCTTACAATATCCTTTATTCCATGTCAATATATTAACAGTCGGTGCAG	UAUUAAC	UAUUAAC	13	24		NA	NA	NA	No	YES	No	No	No	NA	NA
III	748193	748296	104	-1	SPCC14G10.03c	SPCC14G10.03c.1:exon:2-SPCC14G10.03c.1:exon:1	int_5046	25	16	9	0	0	21	2	2	A;A	UUUACUGACUC;UUUCUUUAGUU	12;22	24;1	dbr1_1;dbr1_2	216	156	6.46946	6.40149	108.5	52.3333	7.78568	7.81026	GTAGGTTATTAATGTATAGACTAATATAGTGCTATATTTACTTATTGTTGCACTTATATCTTCCCCCTCTTTTTTTTTCTTTAGTTTTACTGACTCAAGCATAG	UACUGAC	UACUGAC	12	24	UCUUUAG	22	1	NA	No	YES	No	No	No	NA	NA
I	1339376	1339580	205	-1	SPAC6F12.13c	SPAC6F12.13c.1:five_prime_UTR:1-SPAC6F12.13c.1:exon:2	int_1424	28	18	10	0	0	20	2	2	A;A	AUGACUAACUG;CAUGACUAACU	16;17	25;3	dbr1_1;dbr1_2	93	80	8.76948	8.40145	23.5	40.5	6.16603	6.14435	GTATGTGAGTGTAGAGTTACAATATTTTCCAATGTCAATGAATGTTTCTAAAACATTGATCTCTTAAAAAAAAAGTGTTATACTTTGCGCTGTTTTTATTGCATCGGCATCGTGTCATATCATCTGTATTTTAATTAGATCACATCAATTTTTTATTTCTTTTTGGGAACCTCGAATAACACATGACTAACTGCTGTTTTTGTAG	GACUAAC	GACUAAC	16	25		NA	NA	NA	No	YES	No	No	No	NA	NA
I	1454928	1455043	116	1	SPAC3A12.18	SPAC3A12.18.1:exon:1-SPAC3A12.18.1:exon:2	int_326	16	8	8	0	0	13	1	2	A	GUUACUGACCG	20	16	dbr1_1;dbr1_2	69	54	4.89254	4.99914	10	27.5	6.32009	6.0549	GTAAGTTATAAATAAACAACTCTGGTTATTTTTTGGTTGTAGTGATGTTTATGAAAATTTAACATTTCTCAACGTTGTTTATTATTACCGTTACTGACCGAGCTTTTTACTTTTAG	UACUGAC	UACUGAC	20	16		NA	NA	NA	No	YES	No	No	No	NA	NA
I	4152346	4152434	89	-1	SPAC26H5.13c	SPAC26H5.13c.1:exon:2-SPAC26H5.13c.1:exon:1	int_2106	83	51	32	0	0	40	2	2	A;A	UGUACUAAUUC;UUGUACUAAUU	9;10	70;13	dbr1_1;dbr1_2	13	4	4.35918	4.09846	14	5	3.60511	3.59546	GTATGTCTATTTTTTCCAGCTTTTTTCGATGTTTTAATCATGTATTTGTCATTTGCTCTTTTCTATTTTGATTTGTACTAATTCATTAG	UACUAAU	UACUAAU	9	70		NA	NA	NA	No	YES	No	No	No	NA	NA
II	1348417	1348503	87	1	SPBC27B12.14	SPBC27B12.14.1:exon:1-SPBC27B12.14.1:exon:2	int_2632	74	31	43	0	0	36	1	2	A	GUUACUUACCA	17	74	dbr1_1;dbr1_2	40	41	5.30758	6.01877	4.55556	8.4	5.25131	5.33417	GTATGGACATTTTGAGATAGGATCGATTTAGTTGAAAAGATTCTATCCCGAACTTAAGATTGTGTTACTTACCAGTATATAAAATAG	UACUUAC	UACUUAC	17	74		NA	NA	NA	No	YES	No	No	No	NA	NA
III	2197854	2198056	203	-1	SPCC830.09c	SPCC830.09c.1:exon:1-SPCC830.09c.1:three_prime_UTR:1	int_5311	116	76	40	0	0	40	2	2	A;A	UUUACUAAUUU;CUUUACUAAUU	12;13	107;9	dbr1_1;dbr1_2	11	8	10.7861	10.8882	0.375	0.6	4.09617	4.08946	GTAAGTTTCATCATTTCACAAATGGAGATTTCAGAGGATGCGAAATATATACCCAAATTGTATAGCAAGGATAACGGGGTAATCGTTTTGGTTGCCTTCTTGCAGTGATAAAGCATTTTGTCATAGTTACACTGATGAAATTCTTCATTTGCTTAAAACTTTTTGGTCTTAAGTTTGAAAATTCTTTACTAATTTTGAAATAG	UACUAAU	UACUAAU	12	107		NA	NA	NA	No	YES	No	No	No	NA	NA
I	1594183	1594271	89	-1	SPAC23H4.08	SPAC23H4.08.1:exon:3-SPAC23H4.08.1:exon:2	int_1496	45	20	25	0	0	20	1	2	A	UUUAUUGACAG	11	45	dbr1_1;dbr1_2	23	15	5.12857	5.04955	1.71429	1.6	4.72639	4.84418	GTATGCTACTTCTTGAGCTTTTGTGTTGGAATATTACACAAGGACTAATCATTTGAAAAACACAATTACCTTTTATTGACAGTTTCTAG	GACUAAU	UAUUGAC	11	45		NA	NA	NA	No	No	No	No	No	NA	NA
III	686086	686203	118	1	SPCC16C4.10	SPCC16C4.10.1:exon:1-SPCC16C4.10.1:exon:2	int_4518	78	41	37	0	0	43	2	2	A;A	AUGAUUAACAG;UAUGAUUAACA	14;15	72;6	dbr1_1;dbr1_2	14	17	7.69986	7.84265	1	3	6.93188	6.84662	GTAAGTTAACAGATATTATATACTTTTGAGTTGTATGGATTCACTGTGGTTTTGTTTAGCTTTGGTTGACGTGAAACACTCTGTCTTAAGGCAATTTATGATTAACAGCTCTATTTAG	GAUUAAC	GAUUAAC	14	72		NA	NA	NA	No	YES	No	No	No	NA	NA
III	1417439	1417633	195	1	SPCC622.11	SPCC622.11.1:exon:1-SPCC622.11.1:exon:2	int_4660	13	9	4	0	0	11	3	2	A;A;A	UUUACUAACUU;UUUUACUAACU;CUCUUCUACUG	12;13;39	10;2;1	dbr1_1;dbr1_2	13	10	5.24389	5.46085	2.8	11	2.94762	2.84712	GTAGGTAGCTAAATATCATACAAATACAGAATTGGAAGTCATCTAATTGTTCAAGTACTATATAGGGCCTCTAAAAGCCTTCTTGAACTTGTTGCGAGATTGATTACACTTTATCGAAATTACTTCAAGCTTTATGAATACAATTATTACTCTTCTACTGATTTCATGGTTTAAATTTTACTAACTTATTTGTAG	UACUAAC	UACUAAC	12	10	CUUCUAC	39	1	NA	No	YES	No	No	No	NA	NA
II	3541392	3541502	111	1	SPBC887.02	SPBC887.02.1:exon:1-SPBC887.02.1:exon:2	int_3194	93	34	57	0	2	47	1	3	A	AUUUCUGACAU	13	93	dbr1_1;dbr1_2;wt_2	2	1	5.72062	6.01243	1	1	4.18894	4.12071	GTACGTAATCCAACCATTTAAATGCATCTGCATGTTGGTAGTGTACGTGATATTTTATTTGACTGTTGATTTACTGTATTCTCTTTATCTGATTTCTGACATTTTTGGAAG	UUCUGAC	UUCUGAC	13	93		NA	NA	NA	No	YES	No	No	No	NA	NA
II	1893429	1893514	86	1	SPBP16F5.02	SPBP16F5.02.1:exon:1-SPBP16F5.02.1:exon:2	int_2761	12	7	5	0	0	12	1	2	A	UUUACUCACAA	12	12	dbr1_1;dbr1_2	9	9	5.50381	5.45049	1	1.42857	3.89744	3.87375	GTATGTTTAGACATGGTCGGATTTCCTTCAATTACTTGGAAACTGTACTCAATATAAACATTCCGACTTTACTCACAAAATTTTAG	UACUCAC	UACUCAC	12	12		NA	NA	NA	No	YES	No	No	No	NA	NA
I	4733329	4733425	97	-1	SPAC458.02c	SPAC458.02c.1:exon:3-SPAC458.02c.1:exon:2	int_2200	46	22	23	0	1	29	2	3	A;A	UUUACUGACAU;AAUGUUUACUG	12;16	41;5	dbr1_1;dbr1_2;wt_2	63	75	5.48982	5.6821	32	25.3333	6.33768	6.66107	GTATGTTTTGCATTAATATATGTAAGCACTAAAGTTTTGTGTTGGAAAACTTTATGAGCTTGGTAAAGAAACAAAATGTTTACTGACATACTTTTAG	UACUGAC	UACUGAC	12	41	UGUUUAC	16	5	NA	No	YES	No	No	No	NA	NA
II	2274302	2274609	308	1	SPBC16H5.12c	SPBC16H5.12c.1:exon:2-SPBC16H5.12c.1:exon:3	int_2832	160	93	65	0	2	41	5	3	A;A;A;A;A	UUUACUAAUAA;UUUUACUAAUA;AAUAACUAUCC;CGUUUUUACUA;UAAGAUAAGAA	16;17;10;20;212	151;6;1;1;1	dbr1_1;dbr1_2;wt_2	30	19	9.49132	9.40157	1.82353	1.66667	6.24108	6.43231	GTAAGTATGCGTTGTTTATGGATTTAGAGCTGCCAGCGAGAATTCAAAAGCACCCCATCGGGGGAATTATCGACGATCGTTTTACTTTTTAAGATAAGAAGATGCGAATTTGTATGCTTTTGCATGAACTTATCCATAATGGCTTAGCAGGAGTTGAAGCGCAATTGCTCAATTTACTCATTTTGTCATTAAAGATCCTCGTTGGTTCGTAAAAGAATTTTGTCCATACACTTTATTCTCCTTAGCTATTCCTATCCTTAAAATTACTACTCTTTAATACGCGTTTTTACTAATAACTATCCCTTCAG	UACUAAU	UACUAAU	16	151	UUUUUAC	20	1	NA	No	YES	No	No	No	NA	NA
II	4222382	4222516	135	-1	SPBC16G5.05c	SPBC16G5.05c.1:exon:2-SPBC16G5.05c.1:exon:1	int_4302	25	18	7	0	0	20	2	2	A;A	UUUAUUAACCU;AUGUUUUACAU	10;22	24;1	dbr1_1;dbr1_2	54	40	8.01635	8.03757	3.66667	3.15385	7.63558	7.56713	GTATGATTTATTACTTTGCATTAAATAAAAGATGAAAGTTCATCCGCTTGCGAATTCCTTGAGCTCGTTGTTGTGTCTGATCTCAAAATACCAATAATGTGCTGAAATGTTTTACATATTTATTAACCTAAATAG	GUCUGAU	UAUUAAC	10	24	GUUUUAC	22	1	NA	No	No	No	No	No	NA	NA
II	3616766	3616876	111	1	SPBC16D10.09	SPBC16D10.09.1:exon:1-SPBC16D10.09.1:exon:2	int_3206	24	10	14	0	0	16	3	2	A;A;A	UUCUCUAACCU;AUUCUCUAACC;UUUAUUAACUU	12;13;34	21;2;1	dbr1_1;dbr1_2	124	123	4.48796	4.48759	41.6667	124	4.83862	4.82175	GTATGTAAGGGGCAGCATATAAATAAAGATGCTCAACGACAAAGCCTTTCTTTTTTTTAAAAAAAATATATTTATTAACTTCTTTTGAATGATTCTCTAACCTCATAACAG	CUCUAAC	CUCUAAC	12	21	UAUUAAC	34	1	NA	No	YES	No	No	No	NA	NA
III	1615784	1615865	82	-1	SPCC777.10c	SPCC777.10c.1:exon:3-SPCC777.10c.1:exon:2	int_5178	22	11	11	0	0	13	2	2	A;A	UUGAUUAACAU;UUUGAUUAACA	10;11	21;1	dbr1_1;dbr1_2	15	9	4.22739	3.70206	5.33333	10	3.65464	2.77653	GTAAGTTTGTGATTCCGCATGAAAGAATATTTGGTGTAGACTTTTTGAGACTATTATTTTTTATTTTGATTAACATGAAAAG	GAUUAAC	GAUUAAC	10	21		NA	NA	NA	No	YES	No	No	No	NA	NA
I	3187942	3188048	107	-1	SPAC1486.02c	SPAC1486.02c.1:exon:2-SPAC1486.02c.1:exon:1	int_1865	41	24	17	0	0	24	3	2	A;A;A	ACUUCUAACUU;CUAACUUACAA;GACUUCUAACU	17;13;18	30;9;2	dbr1_1;dbr1_2	47	53	3.91942	3.31815	8	18	5.05631	5.07682	GTATGTTAATGACTAGTTAAACGATATTTTTTATTCTTTTTGTTTTTCTTTTAGAGCTTCATTTGATAATGGCTTGTAATGAGACTTCTAACTTACAAAACGTATAG	UUCUAAC	UUCUAAC	17	30	AACUUAC	13	9	NA	YES	YES	No	No	No	NA	NA
III	581123	581238	116	1	SPCC1672.09	SPCC1672.09.1:exon:2-SPCC1672.09.1:exon:3	int_4485	50	38	12	0	0	20	2	2	A;A	UUUACUAAUUG;AUUUACUAAUU	12;13	45;5	dbr1_1;dbr1_2	44	29	4.40015	4.56421	22.5	15	5.54786	5.53861	GTAAGTATTTTGCTGCGTTCAATTTATCATATTTTAAATAATTAGTTACTGGTAAAGTTAATATGGTTTTCGTTCGAGTTTTCTTTTTTAAAAATTATTTACTAATTGTGCTTAAG	UACUAAU	UACUAAU	12	45		NA	NA	NA	No	YES	No	No	No	NA	NA
I	4707179	4707386	208	1	SPAC1834.07	SPAC1834.07.1:exon:2-SPAC1834.07.1:exon:3	int_963	64	39	25	0	0	39	2	2	A;A	UGUACUAAUAU;AUGUACUAAUA	11;12	59;5	dbr1_1;dbr1_2	22	15	5.54541	5.65336	5.75	5.33333	5.22348	4.38099	GTATGTGAATGATAGTAAAACTTTACACGGCGTTGAACGGATTAATTTCATCGTTGTCAGCAACAGCTTGTATGAAATTATAGCATAGCCTTTTTTTATATGCGCTCGTTTTGACGCTTCATTTGAAACGAATTGCCATTTTAATACATTGTTCGAATCACATTCAAGTTGTTCTGAATTTCATTAAATATGTACTAATATATTATAG	UACUAAU	UACUAAU	11	59		NA	NA	NA	No	YES	No	No	No	NA	NA
I	1440277	1440325	49	-1	SPAC3A12.11c	SPAC3A12.11c.1:exon:2-SPAC3A12.11c.1:exon:1	int_1455	1	1	0	0	0	1	1	1	A	AUUGCUGACUU	9	1	dbr1_1	15	15	2.76078	3.85994	2.66667	4	4.27595	4.4908	GTAAGTTTATATTTAATTGCTTTTGGATTGGGAATTGCTGACTTTTTAG	UGCUGAC	UGCUGAC	9	1		NA	NA	NA	No	YES	No	No	No	NA	NA
I	641185	641280	96	-1	SPAC1D4.02c	SPAC1D4.02c.1:exon:3-SPAC1D4.02c.1:exon:2	int_1249	35	17	18	0	0	20	2	2	A;A	UUUUCUAACGA;AUUUUCUAACG	10;11	33;2	dbr1_1;dbr1_2	18	7	4.24995	4.54177	9.5	4	3.91605	3.70263	GTAAGTTTCTAGCTGCGGTTAACGATTCTTATATCTTTTTTGGATGTATTTTTATGAACGCTTATTGAATACAAATAAATTTTCTAACGACTACAG	UUCUAAC	UUCUAAC	10	33		NA	NA	NA	No	YES	No	No	No	NA	NA
II	224978	225298	321	1	SPBC660.15	SPBC660.15.1:exon:3-SPBC660.15.1:exon:4	int_2386	33	22	11	0	0	23	2	2	A;A	AAUGCUAAUGU;UAAUGCUAAUG	15;16	32;1	dbr1_1;dbr1_2	18	7	8.38277	8.24776	4.75	4	4.18786	3.1171	GTATGTTAATTTTCCGCCATCTTAAACTATCTTTGCATGCATAAATTTTGTCGATCAGAAATTTGTTAGCTGGAAGTGTAGTTTTTGATTTGTTTGTTTTGCCTATTGTACCTTAACATTATGTGTTTGGGACACCATCGACCAGAACGGTATACGCTTGAGGAAAAATGGTCTTGTTTTAGATATAAATTTTTTCAGTAAATTACGACGTCCATTTTCCGTTAAGCTTTATTCTTTCTGTTGTCAGGTGCTAAGTACATATATGCTATTTAGACTATTAGGAGTAAATTTATTGGTTTAATGCTAATGTTTGATTTACAG	UGCUAAU	UGCUAAU	15	32		NA	NA	NA	No	YES	No	No	No	NA	NA
II	628260	628537	278	1	SPBC839.16	SPBC839.16.1:exon:2-SPBC839.16.1:exon:3	int_2456	77	39	38	0	0	50	2	2	A;A	UUUUCUAACUG;AUUUUCUAACU	9;10	66;11	dbr1_1;dbr1_2	87	68	9.16868	9.1492	29.3333	17.25	8.77678	8.48316	GTATGAGTGAAGGCGGAGAAGGGTCTCCTAAAATGATTGAAATGCGTAGGGACGAGTTATTAAAAGCGCACTGGTTTTAAAAGTTCACCCTAACACTCATGTACAATCTGGCGTTAGTTGGCGCGATGGATGATTTTTTGGTTTTTCGATAATGTTAGAAGGTAGATGATGCTTGGGTGGACTATTTAAATATTTGCAATTCTCTTATTCATTAAATTCATTTTCTTTCTTTTACATCTCCTTCAATTAAATCCATGCATTATTTTCTAACTGTTTAG	UUCUAAC	UUCUAAC	9	66		NA	NA	NA	No	YES	No	No	No	NA	NA
I	5017060	5017137	78	-1	SPAC890.07c	SPAC890.07c.1:exon:5-SPAC890.07c.1:exon:4	int_2284	54	29	25	0	0	27	2	2	A;A	CUUGCUAACCU;GCUUGCUAACC	9;10	50;4	dbr1_1;dbr1_2	121	67	5.69	5.33609	30.5	34	6.7823	6.16206	GTATGCTTACCAGTTATTTAGGATAGATCTCGTTTTTCTTCACTTACATATTTTTTCTTTCGCTTGCTAACCTGTTAG	UGCUAAC	UGCUAAC	9	50		NA	NA	NA	No	YES	No	No	No	NA	NA
III	2046845	2046896	52	-1	SPCC1739.09c	SPCC1739.09c.1:exon:5-SPCC1739.09c.1:exon:4	int_5269	22	14	8	0	0	16	2	2	A;A	GGGACUAAUGA;AGGGACUAAUG	13;14	21;1	dbr1_1;dbr1_2	20	33	5.4824	5.35918	0.75	1.61905	5.05356	6.06784	GTATGAAGAAGATAGAGAAGAAATGAAAGGAAGGGACTAATGAATGGTTTAG	GACUAAU	GACUAAU	13	21		NA	NA	NA	No	YES	No	No	No	NA	NA
I	4481735	4481892	158	1	SPAC17C9.11c	SPAC17C9.11c.1:exon:2-SPAC17C9.11c.1:exon:3	int_902	6	5	1	0	0	6	1	2	A	AUUAUUAACGC	12	6	dbr1_1;dbr1_2	12	8	10.9671	10.5908	2.6	4.5	6.70788	6.74517	GTAAGTATCAAACTAGTGTTTACTGTCATCATGTGTGACATTAGAATACATGTTTTTGAAAGAATATTGTGTTGCTACTAGCATCTAAACGACATATCTTTGTTTCCTCTGAAAACTTTGAACTATAGACATGGAATATATTATTAACGCTTGCATAG	UAUUAAC	UAUUAAC	12	6		NA	NA	NA	No	YES	No	No	No	NA	NA
II	1175366	1175754	389	-1	SPBC409.20c	SPBC409.20c.1:exon:2-SPBC409.20c.1:exon:1	int_3621	29	24	5	0	0	20	1	2	A	AUUACUAAUGU	11	29	dbr1_1;dbr1_2	90	65	9.57841	9.22007	22.75	22	5.8927	5.61336	GTATGTTCCAATCAAATTTCTATTTTATTCTAAGATTATTCATTTGAAAATCAACTTTCATTTGATATCAATTTCGTTTAGCTTTTGGAGACAAAGGGAGCAGAATATGAGAAATTATAAGTCGGTACTTTGAGTGAATTCTGAATTTGTTTTACAAAACATGCATTGTTAAAATAAATCTGGAAAATTATTTTATCAGGAACGTTTCTAAAAAGGAGCTTTTTGTCTGTTTAAGTTTTCATAATCGGATACGAGCATTCATCTTACCGCTCAATGTTTGCCGCGCTGCTCATTTTTCTGTTGTTCTTATGTTTTTGGAGCTTCACTTCGAATTGATTACTTTGTTCATAGTCTTTATTTTCTTAGCATAAATTACTAATGTCATTTAG	UACUAAU	UACUAAU	11	29		NA	NA	NA	No	YES	No	No	No	NA	NA
II	2566968	2567075	108	1	SPBC29A10.12	SPBC29A10.12.1:exon:1-SPBC29A10.12.1:exon:2	int_2914	9	5	4	0	0	9	1	2	A	UUUACUAACAA	10	9	dbr1_1;dbr1_2	153	139	5.06354	5.08234	10.2667	35	7.05176	7.11399	GTAAGAAGCGATAAGGGTACATGCATACTCTTTTTGATGATGACCATATCATGTATAAACCCTAAACAGGAAAACCATTGTAAATATCATTTTTACTAACAATTTCAG	UACUAAC	UACUAAC	10	9		NA	NA	NA	No	YES	No	No	No	NA	NA
III	1783792	1783974	183	1	SPCC1442.09	SPCC1442.09.1:exon:1-SPCC1442.09.1:exon:2	int_4724	43	20	23	0	0	19	2	2	A;A	GAUACUAAUAC;UGAUACUAAUA	12;13	42;1	dbr1_1;dbr1_2	14	11	8.88215	8.71289	15	6	5.59651	5.52693	GTAATTTGATTTTTTTTGTTCTAACAAGGAGACCCAACCTATGGAAAATAAATAGTAGTATTGGGATATATTGACGAGTTTAGGATTGGGTCTTTCCTTTGTTGTATTGCTTTTAACTGTAAAAGTCGCCGTTTCTAGGGCTATGAAGCTTAAAATTAATACATGATACTAATACTATTTTAG	UACUAAU	UACUAAU	12	42		NA	NA	NA	No	YES	No	No	No	NA	NA
II	4269046	4269135	90	1	SPBC16A3.15c	SPBC16A3.15c.1:exon:1-SPBC16A3.15c.1:exon:2	int_3328	41	22	19	0	0	27	2	2	A;A	UUAGCUAACAU;UUUAGCUAACA	10;11	39;2	dbr1_1;dbr1_2	154	176	6.35124	6.937	77.5	59	6.67898	6.86993	GTATGTTCAATATCCATCTTTTTGTATTGCTGTATACTCTAAATAGTTGGCAATCGATTTTTTCATAAAAAATTTAGCTAACATTTCTAG	AGCUAAC	AGCUAAC	10	39		NA	NA	NA	No	YES	No	No	No	NA	NA
III	1614578	1614825	248	-1	SPCC777.09c	SPCC777.09c.1:exon:2-SPCC777.09c.1:exon:1	int_5175	89	55	34	0	0	49	3	2	A;A;A	CUUAUUAACCA;ACUGCUUAUUA;GCUUAUUAACC	11;15;12	72;13;4	dbr1_1;dbr1_2	659	689	10.9835	10.7939	33	38.3333	8.46169	8.56038	GTAAGTACAAGTTTGTTGATAGAGTATGCATTGTAAGTGCAACTGAACATACGATGGCAAATAATTAGACTATCATCTAATTCTGATTGTTTTCGAGAATTCTGTACTTTGCTCTTGTTTTTAGACAAGTATTGATGTTGAGAATGCTTCTTACTGACCCAACAAAATAAATCTTCATTTGTGCTTTCATACTGCCTCATACAGTACTAATTTTAATATTTCTTAAACTGCTTATTAACCAAGTTTAG	UACUAAU	UAUUAAC	11	72	UGCUUAU	15	13	NA	No	No	No	No	No	NA	NA
I	5549820	5549955	136	-1	SPAC186.08c	SPAC186.08c.1:exon:2-SPAC186.08c.1:exon:1	int_2362	2	2	0	0	0	1	1	1	A	AGUUCUAACUU	14	2	dbr1_1	0	0	0.288034	0.579845	1	1	-16.6096	-0.165575	GTAAGTGACATATTGCACACTTGTTCCTTCTCGAAGTGAAACGGGCATTGCAAGTGGAAACAAACTTATAGGATTCTTGACTAAATCGTTTTATTCAATAAAGGAAAGGGAATATAGTTCTAACTTAATATTCTAG	UUCUAAC	UUCUAAC	14	2		NA	NA	NA	No	YES	No	No	No	NA	NA
III	660198	660297	100	1	SPCC16C4.01	SPCC16C4.01.1:exon:4-SPCC16C4.01.1:exon:5	int_4511	97	43	54	0	0	27	2	2	A;A	UUUGCUAACAC;GUUUGCUAACA	18;19	87;10	dbr1_1;dbr1_2	17	13	2.97956	2.19337	18	14	4.64637	4.4818	GTACGTTTGGCCGATGGTTTCAAATTGAATGACTTCCGTTTAGTAATCAACAATTCCAACAAATTTATTTTACTGTTTGCTAACACATTATTCTACATAG	UGCUAAC	UGCUAAC	18	87		NA	NA	NA	No	YES	No	No	No	NA	NA
I	2178356	2178692	337	-1	SPAC13F5.04c	SPAC13F5.04c.1:exon:4-SPAC13F5.04c.1:exon:3	int_1631	36	21	15	0	0	24	3	2	A;A;A	CCUACUAACCC;CCCUACUAACC;GAUGCUUAUAA	18;19;42	32;3;1	dbr1_1;dbr1_2	0	2	8.02805	7.89914	0.5	1.5	2.36522	1.33511	GTACGTGAGTCAAAAACAGCGAGAGCAAGTGAGACGGAATGAAAAAGAGTAACGAGCAGAACTTAGGAGAAAAAAAAAAGAAAACCACGATCAACAAAAATGAAAAAATGAAGGTTCTTTGGAAATTTTTTTATTTTTTATTTTTGTTTTGTCAAAAACAAAATCGTCTTTTCCAATTCACATTACCATGTGTTTTTTTTTTCGACTCGTTTCTTCTTTTGCCATTCTGAGGATTTCCTTCCTATCGGTATTTTTCTCTCTCGTTTGTATTATACAACGATGCTTTATGATGCTTATAACGATTTTTTGTTCCCTACTAACCCCTATTGCTACGTAG	UACUAAC	UACUAAC	18	32	UGCUUAU	42	1	NA	No	YES	No	No	No	NA	NA
II	3524760	3524874	115	1	SPBC1105.10	SPBC1105.10.1:exon:1-SPBC1105.10.1:exon:2	int_3190	17	11	6	0	0	16	4	2	A;A;A;A	UUAACUAAAUG;UUGUUUAACUA;UAACUAAAUGG;UUUAACUAAAU	8;12;7;9	8;7;1;1	dbr1_1;dbr1_2	17	10	5.55236	5.81049	1.28571	1.57143	4.60237	4.22041	GTAAGTGAATGGACGCAAACGATATGCGTTTGTCTGCTAGTGGTTAAACTGCAGAACGAAAGCAGCATGTCAAAGTATTGTTTCCAATTGAAGTAATTGTTTAACTAAATGGTAG	GUUUAAC	GUUUAAC	12	7	ACUAAAU	7	1	NA	YES	YES	No	No	No	NA	NA
I	2016699	2016840	142	1	SPAC17H9.07	SPAC17H9.07.1:exon:2-SPAC17H9.07.1:exon:3	int_425	24	12	12	0	0	21	2	2	A;A	UUCGCUAACAG;UUUCGCUAACA	17;18	22;2	dbr1_1;dbr1_2	23	18	5.16825	5.11746	12	9.5	7.35445	7.16891	GTATGTATTATTAGTATATCAATTGTTTTTGCATTGTTATAAAAAGAAGCGCTTGGAAGGAAGATGTTTTCCTTTAAAAGTAGTTATTAATGTAACTATGCTCTTCTAATTTTTACGTTTCGCTAACAGTCATGTTATATAG	CGCUAAC	CGCUAAC	17	22		NA	NA	NA	No	YES	No	No	No	NA	NA
III	1980782	1981105	324	-1	SPCC18.14c	SPCC18.14c.1:exon:2-SPCC18.14c.1:exon:1	int_5262	22	13	9	0	0	14	2	2	A;A	UUCACUAACUU;UGAAAAAAUAU	12;240	21;1	dbr1_1;dbr1_2	1051	991	9.22824	9.14403	263	198.4	9.47606	9.52237	GTATGTCCTATAATATCAAATACTTCAAGGAGTTTTAAACCTTTTGTTATAAATAATGCCTTTTCTTTGAGGTTCAATGAAAAAATATATATTTTTGAACCTCCTTAATCTTTTCGATGCTTCTCCATCGGCAGATTTCGTTGAAGGAGCATTATATATGAAACAATTGTTTTGCAATGCGTTTTGATGAGGATTATTTTAACTCGCTAAATTTTCATGAGCGCAAAGTTTAAACACTCTAATTTTTTGCTGAACGCTTGTATACAATTAAACTCTTTGAATCATTAAATTATTTTTGTACTCAGTTCACTAACTTTATTTTAG	CACUAAC	CACUAAC	12	21	AAAAAAU	240	1	NA	No	YES	No	No	No	NA	YES
I	1380976	1381267	292	-1	SPAC57A10.09c	SPAC57A10.09c.1:exon:3-SPAC57A10.09c.1:exon:2	int_1434	71	41	30	0	0	41	2	2	A;A	AUCACUAACCC;UAUCACUAACC	12;13	65;6	dbr1_1;dbr1_2	190	130	6.83312	6.74192	95.5	43.6667	7.62541	7.44451	GTAAGATGTTTTTGTAGTTATGGCAGCATCTACGCGTTATACACAAGTGATTATGGCTACCTCCACTTGAAAAGTTGAGTATTGGTTATTACGTTTGCAATGAGTACCAAATTTTTTGTTTAAAGTTAAAAATTCAATAATAAATTACTTGGAGACGCACGCATTTTAGGGCTCTTATTTTTTTTTCGTGTCAAATGCAAATGTGTTTGTATCTGAATTATATAAGGCGTCTGGGTGTTTGTTCTAATACTTTGATTTGTTTTGTTCTCGTTTATCACTAACCCAATTTTAG	CACUAAC	CACUAAC	12	65		NA	NA	NA	No	YES	No	No	No	NA	NA
I	5299126	5299230	105	1	SPAC11E3.09	SPAC11E3.09.1:exon:1-SPAC11E3.09.1:exon:2	int_1093	70	41	25	2	2	42	2	4	A;A	AUUACUAACUU;AAUUACUAACU	24;25	49;21	dbr1_1;dbr1_2;wt_1;wt_2	26	23	4.12067	3.81103	5.4	8	4.41186	4.40549	GTTAGGAATAAAAAGAAATTGCGGGATTGTAAACGGCTTTGGCCTTTTTTCTTTTCATCATTTTTTGTAACATAATTACTAACTTAGTCTTCTTTATTTATATAG	UACUAAC	UACUAAC	24	49		NA	NA	NA	No	YES	No	No	No	NA	NA
III	416780	417004	225	-1	SPCC306.05c	SPCC306.05c.1:exon:2-SPCC306.05c.1:exon:1	int_4937	120	78	42	0	0	26	2	2	A;A	GUUUGAUAGUA;CUUGCUAACUU	64;12	110;10	dbr1_1;dbr1_2	13	13	9.23854	9.03218	4.66667	4.66667	4.01793	4.09111	GTAAGTTTTACATTATACGAGGCGTTCCTTTAAATAAAAAAGTGAAATATATATGCAAGATGTATGGAGTTACAGCAATTATCTATGCGTAACGACTTCTTGATATAGTTTATTCATCACCATAAATAAGTTGTGCTGTTTTCTGAGAATTTAAGTTTGATAGTAAACCCTCTTTGCCAATGCTTACTATGCATCGTGAATATACTCTTGCTAACTTATCTCTAG	UGCUAAC	UUGAUAG	64	110	UGCUAAC	12	10	NA	YES	No	No	No	No	YES	NA
II	3965549	3965637	89	-1	SPBC26H8.07c	SPBC26H8.07c.1:exon:5-SPBC26H8.07c.1:exon:4	int_4247	25	13	12	0	0	13	1	2	A	AGUACUGACGA	10	25	dbr1_1;dbr1_2	645	431	5.35918	5.42038	46.1429	54	9.21343	8.90609	GTAGGTTTTTTTGCTTTCTTACAAGTGTTCGGTTGCTTAAAACTTTTTGAAAAAATTTTTTTTTGTTTATTTAGTACTGACGACTGTAG	UACUGAC	UACUGAC	10	25		NA	NA	NA	No	YES	No	No	No	NA	NA
III	1465062	1465157	96	-1	SPCC11E10.07c	SPCC11E10.07c.1:exon:4-SPCC11E10.07c.1:exon:3	int_5149	42	26	16	0	0	30	2	2	A;A	UGUACUAACGU;UUGUACUAACG	11;12	35;7	dbr1_1;dbr1_2	25	35	6.73304	7.13762	13	18	4.93243	5.12673	GTACGTAAACGTTGAATCCATTCAGCTTACAATTATTTTTCCCTATGATCTCTCCATTTCCCTGTTAATTTTAAAATTTGTACTAACGTTTTTTAG	UACUAAC	UACUAAC	11	35		NA	NA	NA	No	YES	No	No	No	NA	NA
II	4164716	4165152	437	1	SPBC14F5.06	SPBC14F5.06.1:exon:1-SPBC14F5.06.1:exon:2	int_3313	55	36	19	0	0	37	1	2	A	UUUGCUCACCA	13	55	dbr1_1;dbr1_2	197	156	9.00781	8.95988	6	12.0769	6.51987	6.35011	GTAAGAAAATAAAAAAATTAAAGGAGCTTTATTAGTAGAAGGTTATAGTCTACTCGTTGTGGATGACTGGAGCTTTTTTGTGTGTGCACAAAGTTTTCCACGAAAAGAGTTGAGTCAAATTTTGTTTGTTCAAGTATTAAAACATATTTTAACTGCCCTGATTGTACCTCTGTTCAGATTTTTTGATCCTGTTACGATCTGCCAAGCACTTTCGGACTAGTAGTAAATTTTTGCTTGGCTTGGCTGTCACCATATGTTGGTTAAACGAATCTAAAGGTTCTTGTAAGGTAAAGGACCGAAAATTTAAATAAACTTTCAAAGTGGTCTGTGTCACGTTAAAATACGTTTTATTGCTTGCTTACGAAACTTTCCTTTGCTTTTAATGCTTCTGGTTTTAGA…	CCCUGAU	UGCUCAC	13	55		NA	NA	NA	No	No	No	No	No	NA	NA
III	150164	150278	115	-1	SPCC320.09	SPCC320.09.1:exon:3-SPCC320.09.1:exon:2	int_4884	75	41	34	0	0	43	2	2	A;A	AGAACUAAUGU;GAGAACUAAUG	10;11	68;7	dbr1_1;dbr1_2	8	9	4.11496	3.90927	9	5	5.04148	4.91961	GTAAGACTTTAATTGAAGAAGCGTTTGTATGGAGTACAGCCTGAAAAACGCTTCAACTTTTGTTGTTTTTATATTCATTTATAATTACTATCAACACGAGAACTAATGTTTTCAG	AACUAAU	AACUAAU	10	68		NA	NA	NA	No	YES	No	No	No	NA	NA
I	3258749	3258929	181	-1	SPAC6G9.07c	SPAC6G9.07c.1:exon:4-SPAC6G9.07c.1:exon:3	int_1875	38	23	15	0	0	25	2	2	A;A	CAAACUAACCU;UCAAACUAACC	17;18	36;2	dbr1_1;dbr1_2	130	125	7.83709	7.7411	65.5	31.5	6.05774	6.25226	GTACGTTATTACAAATTGTAATTGGCAAAAAAGTGTTCAAGGGAAGAATTTCTAGAGATTTTGCGTTAGTTTAAGTGTTCACTGTTCTGCCTCAGCCATTGTATAGTTCTTCTTTTTTTTCTTTTTCGAAGTTGCCATTGCTATTTGTAAATATCATCAAACTAACCTTTCTTTGTTATAG	AACUAAC	AACUAAC	17	36		NA	NA	NA	No	YES	No	No	No	NA	NA
I	3798227	3798347	121	-1	SPAC1556.02c	SPAC1556.02c.1:exon:2-SPAC1556.02c.1:exon:1	int_1994	66	39	27	0	0	48	4	2	A;A;A;A	CAAUCUAACAA;UUUUCUAAACA;ACAAUCUAACA;GUUUUCUAAAC	9;18;10;19	30;28;5;3	dbr1_1;dbr1_2	22	16	6.87869	7.03384	3.28571	2.83333	3.61959	3.64292	GTATGTTTTTTTTTAGTGACTCGTCTTATTTTTGGAAGCGGTGCAAATTTTATGATTTTTAAGCAACCCTTCTTTGTTTCTCTACTCTATGAACAGTTTTCTAAACAATCTAACAATGTAG	AUCUAAC	AUCUAAC	9	30	UUCUAAA	18	28	NA	No	YES	No	No	No	NA	YES
I	1916388	1916817	430	1	SPAC110.03	SPAC110.03.1:exon:2-SPAC110.03.1:exon:3	int_407	82	35	47	0	0	39	2	2	A;A	UUUACUGACUA;UAUUCUAACUU	10;81	81;1	dbr1_1;dbr1_2	122	109	9.2092	9.03089	24.6	18.3333	6.8292	7.00172	GTAAGTATAATTAGTTGTTTATGGAATGAAGTACTTGGTGAAGTTTTGTCCCCATATTAGAAATTTTTTACTATTCAAATGTTCGGTCACGGAAAATTTTGATATAAGGCTTTTTGTCAAAAAAAGGCTGAAGGATTAAACAATGACTCAATGTATTTATCGATTTTATCTCAGAAACTATTGAAAGTTTAATAATTTTTTTTTATCCGATGCTTTTTTTTTTCCACACTAGATCTAAAGACCGTAGGAAGCCTTATCTCGTAAGGAATAAGATGAGGCGACCACTTTCTTTCCCAGGAAGATTTGGTCGTTATTATTTCTGCTATTTGCTATATTGGGGACTATTCTAACTTTCTTGTTGCTTTTACTCCCGTTTTTAATTGATATAGCTGATTTTCA…	UACUGAC	UACUGAC	10	81	UUCUAAC	81	1	NA	No	YES	No	No	No	NA	NA
I	4779668	4780022	355	-1	SPAC11H11.03c	SPAC11H11.03c.1:exon:3-SPAC11H11.03c.1:exon:2	int_2221	25	13	12	0	0	18	2	2	A;A	UGUGCUAAUUA;CUGUGCUAAUU	11;12	21;4	dbr1_1;dbr1_2	3	3	6.12781	5.86805	1.33333	4	3.48619	3.31857	GTAATCTCAAATTCTCATTAAAAGCTGTGATTGTTAGTTCAAACCCTATAAACTTTCAATAATAGAAAAACAAACCCATCATGAGATTTTTCTTTCTTTCTTTTCCACTCTTTTTGTTTGGTATCTAATTCCGGTAGTTATCGGTCAGACAATACGCCAAACAATAGTAGTTATGACAATGAACTATTCTTTGTACAAAGTGAAGAGCTCTGAAACAGCTGAATAAAGCCATGTGATTTAAGAGAAAAATGGGTTGGCTTCTTTATAGAACTTAAAACACTGGGTTTCTTCAAACCCATATTGGCTTCGAGAAAACAAAATAGAAGTGTTTTATGACTGTGCTAATTATTGATAG	UGCUAAU	UGCUAAU	11	21		NA	NA	NA	No	YES	No	No	No	NA	NA
II	1199242	1199376	135	-1	SPBC4.07c	SPBC4.07c.1:exon:2-SPBC4.07c.1:exon:1	int_3626	48	17	31	0	0	31	2	2	A;A	AAUCCUAACUC;UAAUCCUAACU	12;13	47;1	dbr1_1;dbr1_2	170	130	6.7333	7.14507	24.4286	65.5	7.08598	7.02549	GTAAGTATTTGAGTATTTTGAGGCTGAAAACAAGACTGAATTAAATGTAATTTTTTCATCTATCGCTGAATAGTCTTGTTTTCACTCTATCACATTCTTTTCATGTTTTAATATTTAATCCTAACTCTCCTATAG	UCCUAAC	UCCUAAC	12	47		NA	NA	NA	No	YES	No	No	No	NA	NA
III	469498	469625	128	-1	SPCC4G3.02	SPCC4G3.02.1:exon:2-SPCC4G3.02.1:exon:1	int_4945	69	45	24	0	0	32	2	2	A;A	GCUGCUAACGA;AGCUGCUAACG	10;11	62;7	dbr1_1;dbr1_2	9	19	5.04791	5.07669	2.5	5	3.5764	4.50976	GTAAGTTAACGGTCTCATGTGTGTAGATATTGGTGTTTGCAAACTTTTGTTTGTCATTCTTATTTATTCTATAACGGCAGACAGTTTGTGATTTTTCTTTGGTTGAGGTCAGCTGCTAACGATTTTAG	UGCUAAC	UGCUAAC	10	62		NA	NA	NA	No	YES	No	No	No	NA	NA
I	5390708	5391088	381	-1	SPAC3G6.06c	SPAC3G6.06c.1:exon:3-SPAC3G6.06c.1:exon:2	int_2354	68	47	21	0	0	36	4	2	A;A;A;A	AAUGCUAAUUU;UUUAUUAAUGC;CUUUAUUAAUG;UUCACUAACAG	16;22;23;180	55;10;2;1	dbr1_1;dbr1_2	3	2	6.38115	6.25856	4	3	2.10603	2.23434	GTAAGTTGAAAGACTAAATAGAAAGCGAAAGTCTCAGTTGACTTGGCAAAGACTGTATGGCTTCTGATTTTGTTTGTAAATATGGGTTAAACACTATGGTGTACAGTTTTTATTGCTAAAGAGCAAAGCTCTATGTCTTAACTCGAGACAAAGATATGATACAAACGAAATATAGAATAAAGGATGAATAAATTTTCACTAACAGTGACTCGGTTAAATTCATTGCTCAAGGTATTTTACATCATTTCTTTACTTTGTTGGTTCTTGAAGTTGCAAACACTAATAGGTCAAACTCTATTCAACTGATTCTTTCCTTTTCGAAGGGTTGATTTATAAAGTCTTCTTGAGGTACTTTATTAATGCTAATTTCGTATATTACAG	UGCUAAU	UGCUAAU	16	55	UAUUAAU	22	10	NA	No	YES	No	No	No	NA	NA
I	1402465	1402655	191	-1	SPAC20G8.05c	SPAC20G8.05c.1:exon:3-SPAC20G8.05c.1:exon:2	int_1439	80	44	36	0	0	38	3	2	A;A;A	CUGACUAACUA;UCUGACUAACU;AAGUCUGACUA	10;11;14	74;3;3	dbr1_1;dbr1_2	9	5	8.79029	8.85888	3.33333	3	3.93939	3.89862	GTAAGTATGGTTGCCTCGTTTGGAAGTTGCAGCTCTACCTTAAGCGCTACGATGATTCAAGAAATATGTTTTTGGTCGTTTCATTGTCATTTAAGATGTTTTACAGATAATCGTGGATTCTTAAGATAGCTTGTGTAATGAACCGAAGGGTTCGGTATGATTATTGATTAAAGTCTGACTAACTAAATTAG	GACUAAC	GACUAAC	10	74	GUCUGAC	14	3	NA	No	YES	No	No	No	NA	NA
II	493481	493583	103	-1	SPBC902.05c	SPBC902.05c.1:exon:2-SPBC902.05c.1:exon:1	int_3471	14	7	7	0	0	11	1	2	A	UAUAUUAACAG	16	14	dbr1_1;dbr1_2	167	133	4.36141	4.53539	168	134	6.57835	6.55966	GTAAGTTGTGAATTGGCTCCTAAGCGATAAATCGCTGGTTTAAGCAGCCTTACTCGTCTTTTCATGATTATTTGATCGATTATATTAACAGAGTTATTTTTAG	UAUUAAC	UAUUAAC	16	14		NA	NA	NA	No	YES	No	No	No	NA	NA
I	2607959	2608088	130	1	SPAC823.15	SPAC823.15.1:five_prime_UTR:1-SPAC823.15.1:exon:1	int_555	43	20	23	0	0	28	2	2	A;A	UUUAUUAACUA;GUUUAUUAACU	14;15	37;6	dbr1_1;dbr1_2	22	7	4.6199	4.28879	4.6	1.33333	4.09538	4.20662	GTAAGTGGGAAGTTGAAAAACGCATGCTCAACGCAGGATAGCATACAAACGGAAAAGCCCTTATGGATTTTTCTGTGGATGCTTTTCTTTTTAATTAAAAATTTAGTCGTTTATTAACTATTGCTTTAAG	UAUUAAC	UAUUAAC	14	37		NA	NA	NA	No	YES	No	No	No	NA	NA
II	493084	493237	154	-1	SPBC902.05c	SPBC902.05c.1:exon:4-SPBC902.05c.1:exon:3	int_3469	261	123	137	0	1	61	3	3	A;A;A	UUUACUAAUUC;GUUUACUAAUU;CGCACGAAAAU	10;11;25	246;13;2	dbr1_1;dbr1_2;wt_2	34	35	7.33029	7.16538	2.5	2.76923	6.71497	7.28461	GTATGTCAAGTATAAGAGAAGATGGTTGGATTTGTATGCAGTTTGGCCTTTCTTTTATACGTTTTTGTCAGCAATGCTTGTTCCTGCTTGTCAAGTCCTTCCATGTCTCCTCGAGATTATCGCGCACGAAAATCACGTTTACTAATTCGTTTAG	UACUAAU	UACUAAU	10	246	CACGAAA	25	2	NA	No	YES	No	No	No	NA	NA
II	4138852	4138975	124	-1	SPBC1861.04c	SPBC1861.04c.1:exon:2-SPBC1861.04c.1:exon:1	int_4293	36	16	19	1	0	21	1	3	A	UUUAUUAAUGG	11	36	dbr1_1;dbr1_2;wt_1	6	7	4.50875	5.03503	7	8	4.89006	4.89742	GTATGTCAATCAACAATCGTCTAGGTAAAGCGTGTTGAGGCGAATTCCATAGACTCGCAAAAATTATTCACTAATTACTTTAACTTTGTTAATCTTTTGACAAGCATTTATTAATGGTTTTTAG	CACUAAU	UAUUAAU	11	36		NA	NA	NA	No	No	No	No	No	NA	NA
I	1321484	1321781	298	1	SPAC6F12.07	SPAC6F12.07.1:exon:1-SPAC6F12.07.1:exon:2	int_299	9	4	5	0	0	8	2	2	A;A	UAAGCUAAUUU;CUAAGCUAAUU	14;15	7;2	dbr1_1;dbr1_2	62	59	7.80107	7.73122	31.5	20	4.25695	4.22882	GTAAGTTTCTAAATTTTGAAAAAGCATTGTTATGATGATTAGATTTTTGAGATAAGCGGGCGTTTGTTTTCTCTTTTTGATCTTGAAAATAGAAGTACTGTATTTCAGTCGAGATTTTATTGATAGGGTTAAACATTGATCTTGTTCAATAAGAAGTCATCGCGTTTTTTTGTTTCATCACGACTAGTAGTTCAATAACTTTTTTTATACTTATAAGATGTGGAAAAACATTTCTTTCGTTACCTTGCTTTCTGGTTTCACAAGTCTACTGTTTTTCTAAGCTAATTTATTAAATTAG	AGCUAAU	AGCUAAU	14	7		NA	NA	NA	No	YES	No	No	No	NA	NA
I	4589324	4589409	86	1	SPAC12B10.09	SPAC12B10.09.1:exon:3-SPAC12B10.09.1:exon:4	int_935	34	19	15	0	0	18	2	2	A;A	GAUACUAAUUU;UGAUACUAAUU	10;11	29;5	dbr1_1;dbr1_2	2	0	5.97159	5.85574	3	0.5	3.74544	3.69556	GTATGTGTTTGATTTTTTGATTAAACTAAAGAATTTTGCGCGTGAATCACTACCTTGATATACACTTTTGATACTAATTTGTTTAG	UACUAAU	UACUAAU	10	29		NA	NA	NA	No	YES	No	No	No	NA	NA
I	605356	605437	82	-1	SPAC3H8.09c	SPAC3H8.09c.1:exon:2-SPAC3H8.09c.1:exon:1	int_1245	22	9	13	0	0	12	1	2	A	CUUGCUAACGU	11	22	dbr1_1;dbr1_2	6	7	3.5415	3.76918	1.75	4	2.79475	3.4236	GTAAGGAATTATCGTTGCTGCAATTAATTTCGCAAAACATCGCAATTTTGTTTGTTTTTTTAGCCTTGCTAACGTAATACAG	UGCUAAC	UGCUAAC	11	22		NA	NA	NA	No	YES	No	No	No	NA	NA
I	2184268	2184313	46	-1	SPAC13F5.06c	SPAC13F5.06c.1:exon:2-SPAC13F5.06c.1:exon:1	int_1637	1	1	0	0	0	1	1	1	A	UCAACUAACAG	11	1	dbr1_1	6	3	2.17385	0.14375	7	4	1.70306	2.45431	GTAACCGAATCCCGTTTTTGCCCTTTTCTCAACTAACAGATTATAG	AACUAAC	AACUAAC	11	1		NA	NA	NA	No	YES	No	No	No	NA	NA
II	401684	401843	160	-1	SPBC106.12c	SPBC106.12c.1:exon:5-SPBC106.12c.1:exon:4	int_3428	11	7	4	0	0	8	1	2	A	UAAACUAACCU	13	11	dbr1_1;dbr1_2	30	30	6.85446	7.06647	31	31	2.94664	3.44491	GTAAGTGATATATGTTTACTATGTTTTCAAAAGCCTCGCTTTTAGTTTTCGATTGAAGATTATGAAACGAACCTGACAAAAAATCTCCCTGTCAAGCTAAGTAGAGCTTTGTTCCGATTTCGAATCGCTTTTTTTATTAATAAACTAACCTTTTCTTAAG	AACUAAC	AACUAAC	13	11		NA	NA	NA	No	YES	No	No	No	NA	NA
III	2162501	2162583	83	-1	SPCC1620.09c	SPCC1620.09c.1:exon:2-SPCC1620.09c.1:exon:1	int_5305	30	17	13	0	0	14	1	2	A	UAUGCUUACUC	9	30	dbr1_1;dbr1_2	22	21	1.8078	1.29226	23	22	6.58908	6.74805	GTAAGTTTTTATCCCATTTGAAGATGTTGGATGTTTATCATTCATCTTTTGATCATTTAAGATTTTTTATGCTTACTCTATAG	UUUUGAU	UGCUUAC	9	30		NA	NA	NA	No	No	No	No	No	NA	NA
I	4929101	4929248	148	-1	SPAC1B3.02c	SPAC1B3.02c.1:exon:4-SPAC1B3.02c.1:exon:3	int_2262	26	15	11	0	0	22	3	2	A;A;A	UUUACUAACAU;AUUUACUAACA;CUUAUUUACUA	11;12;15	22;3;1	dbr1_1;dbr1_2	87	64	5.51476	5.2652	44	65	5.4171	5.23575	GTATGAAAGAGGTGTTTTATTTCAATAGCGGCACGTAAATTATTACGATTAATATTGCGGTTAATTTCTTTTATATCGTCTCTTTATCTTCTTATTTCTTGTTCTTTTATGAAATTTTCTTGTACACTTATTTACTAACATTATCAAG	UACUAAC	UACUAAC	11	22	UAUUUAC	15	1	NA	No	YES	No	No	No	NA	NA
III	1778695	1778831	137	1	SPCC1442.06	SPCC1442.06.1:exon:3-SPCC1442.06.1:exon:4	int_4723	84	50	34	0	0	46	2	2	A;A	UAAGCUAACUU;UUAAGCUAACU	14;15	73;11	dbr1_1;dbr1_2	66	68	7.16315	7.05711	33.5	69	5.96355	6.13264	GTATGCTTTTTATCATTAAATCGATTTTATTTAAACTATATTATGTTAGATGCAACATTGTTTAAGTAAATTTGTTTCTCTCATCTTCATTATTCTGTTTTTTTTTTACTCTACTTTAAGCTAACTTCATTATTTAG	AGCUAAC	AGCUAAC	14	73		NA	NA	NA	No	YES	No	No	No	NA	NA
I	3735277	3735476	200	-1	SPAP7G5.02c	SPAP7G5.02c.1:exon:3-SPAP7G5.02c.1:exon:2	int_1988	91	61	29	1	0	65	2	3	A;A	UGUACUAACCA;UUGUACUAACC	13;14	76;15	dbr1_1;dbr1_2;wt_1	67	35	8.01587	8.13327	6.18182	2.57143	6.04175	5.58668	GTACGTTTTAAAAATTATATTAAAATGAATTTGATTGTGATTGAAGGAGTTTCGCGCTTGTGATATATTAGTTGTGAATTTTTTATCTCTTCTCTGATCAATTCTTCAATGAGCCTATTTTTTATCTCATAAAAAATAAAAATGGCTCTAGTAGTGGTCTTTTCGACTTCCTGATTCGTTTGTACTAACCATAATTGTAG	UACUAAC	UACUAAC	13	76		NA	NA	NA	No	YES	No	No	No	NA	NA
II	1770112	1770237	126	1	SPBC18H10.02	SPBC18H10.02.1:exon:1-SPBC18H10.02.1:exon:2	int_2737	366	223	141	2	0	90	5	3	A;A;A;A;A	UAGACUAACUG;UUAGACUAACU;CAAACUUAGAC;AACUUAGACUA;UGAAGUAAACA	14;15;20;18;33	327;26;11;1;1	dbr1_1;dbr1_2;wt_1	63	49	10.0074	10.1324	3.36842	8.33333	6.06114	5.87722	GTATGTGAAATATATAGTGGTAGAAAGCGTGAGAAACTTAACTTTTGTTAAGCAATGCTTGAATTGGCTGAGAAGTGAAGGAATTATGAAGTAAACATTCAAACTTAGACTAACTGTACCATGTAG	GACUAAC	GACUAAC	14	327	AACUUAG	20	11	NA	No	YES	No	No	No	NA	NA
III	887734	888239	506	-1	SPCC16A11.10c	SPCC16A11.10c.1:exon:2-SPCC16A11.10c.1:exon:1	int_5068	29	18	11	0	0	20	2	2	A;A	AUUAUUAACUU;GAUUAUUAACU	11;12	25;4	dbr1_1;dbr1_2	1411	1051	8.38401	8.67866	30.6957	33.9355	9.74826	9.5658	GTAAGTAAATTTTTAGGGGTACGCGATAATGGAGGTCTTGAGGAAGATTGGTTGTAATGCATAAAAATTGGTCGCGATTGTGTGGAGTCGTAGAAATCGAAGTTTCAGACAACTAGCGTTACAAAACTTTGAATTTCACGAGAGTTTAGGTGTCGCATATACACATGTTCTTTAATTTGAAAGATTCAGGACGAATCTTTGCCGTAGGAACGTACAAAAATAGATGCGATATCCTGAATAAATACGATGTTTAATGCGACATTGTCATTGAAGGTGAATTGTTAAGTACAGTCTATATGTTCCAAGATTGATCGCTCTCTACTCGATGTTTTGTATTTCCAGTACTCTGAATACACTGAAATACATAATTTTGGAAAGATTGATTGACGATATCGCTTC…	UAUUAAC	UAUUAAC	11	25		NA	NA	NA	No	YES	No	No	No	NA	NA
II	731551	731632	82	1	SPBC119.08	SPBC119.08.1:exon:3-SPBC119.08.1:exon:4	int_2474	24	5	19	0	0	14	3	2	A;A;A	CUUACUAACUA;ACUUACUAACU;AUUACUUACUA	13;14;17	22;1;1	dbr1_1;dbr1_2	7	1	2.82529	3.47967	2.66667	0.666667	4.15976	3.8193	GTATGTTACGCGATGATCCACATATGGTGTCTGTTTTAGTCACGGAAATATTTGTATAATTACTTACTAACTATTATAATAG	UACUAAC	UACUAAC	13	22	UACUUAC	17	1	NA	No	YES	No	No	No	NA	NA
III	2246449	2246602	154	1	SPCC790.03	SPCC790.03.1:exon:2-SPCC790.03.1:exon:3	int_4847	10	7	3	0	0	9	2	2	A;A	UUUAUUAACUU;GUUUAUUAACU	13;14	9;1	dbr1_1;dbr1_2	16	9	6.38482	6.32532	2.42857	2	3.86166	3.48429	GTAAGCATTTCTTATAATTATGGTTGCAGATGCATACTTCCACACGTCTTCTTTCCTCACAATGTTAAGAAACAACCTGGTTTGTATGATTTTTTGCAAACGTCGAACCTCTCTTGTCTTTTAAATGATGGCGGTTTATTAACTTATTTTTTAG	UAUUAAC	UAUUAAC	13	9		NA	NA	NA	No	YES	No	No	No	NA	NA
II	2030796	2030870	75	-1	SPBP23A10.14c	SPBP23A10.14c.1:exon:2-SPBP23A10.14c.1:exon:1	int_3775	16	9	7	0	0	12	2	2	A;A	GUUGCUAACCA;UGUUGCUAACC	19;20	15;1	dbr1_1;dbr1_2	7	5	3.39459	4.34537	2.66667	2	4.76616	4.45179	GTATGTGTGGGCATTTGTGAAGAGCGATAAAGAAGAATGAATTTTGAATGTTGCTAACCAATATACTTTTTTTAG	UGCUAAC	UGCUAAC	19	15		NA	NA	NA	No	YES	No	No	No	NA	NA
I	925858	925961	104	-1	SPAC1687.12c	SPAC1687.12c.1:exon:3-SPAC1687.12c.1:exon:2	int_1317	21	11	10	0	0	16	2	2	A;A	UUUACUAAUGC;AUUUACUAAUG	7;8	19;2	dbr1_1;dbr1_2	0	0	4.40297	4.25226	0.0526316	0.125	4.72733	4.93033	GTATGAAATTTAGGTAGTAAAAACACTTCGGCAAATTCTTTTGACCTTTGCTACAGAAGTTGGTGAAAAGCTATATTTACTTTTTCTGGATTTACTAATGCTAG	UACUAAU	UACUAAU	7	19		NA	NA	NA	No	YES	No	No	No	NA	NA
I	4481013	4481157	145	1	SPAC17C9.11c	SPAC17C9.11c.1:exon:1-SPAC17C9.11c.1:exon:2	int_901	52	39	13	0	0	33	2	2	A;A	UUUAUUAACAA;UUUUAUUAACA	20;21	48;4	dbr1_1;dbr1_2	93	62	6.07822	6.29474	18.8	12.6	3.25473	3.08234	GTATGTATAGATTTTACTCCTTTTACTTTTTGCTGAATGGTTGAAGCGTTCGAATTGTTAACCATCCTTATTATTATAATTCACGAAAACAATAATTTGTTTCACTCGATCCTTTCTTTTTATTAACAACGATTATAAAACATAG	UAUUAAC	UAUUAAC	20	48		NA	NA	NA	No	YES	No	No	No	NA	NA
III	783376	783593	218	1	SPCC1020.04c	SPCC1020.04c.1:exon:1-SPCC1020.04c.1:exon:2	int_4541	143	91	52	0	0	66	3	2	A;A;A	AUUUCUAACUC;AAUUUCUAACU;UCUUUUAAUUU	14;15;21	129;12;2	dbr1_1;dbr1_2	206	159	9.01563	8.98525	4.6	5.33333	8.23276	8.22336	GTGAGTAGATGCGTGGATTTACAATAAAGCGTCGTACAAAGGCACTAGCGTAATTGCTTAAGTCCTGAATCGTTATGCTGTTTTGCAGTCATGGAGTTTAAAAAAAAACGATATAGTTAAAAATTTTTTTTTTATTTTCTAGTTAGGATTGTCTGATTATGATGAATTTTGTTTCTTTTCAATTGAGCTTTCTTTTAATTTCTAACTCTTTATTTTAG	UUCUAAC	UUCUAAC	14	129	UUUUAAU	21	2	NA	No	YES	No	No	No	NA	NA
II	1919702	1919918	217	-1	SPBC16E9.02c	SPBC16E9.02c.1:exon:3-SPBC16E9.02c.1:exon:2	int_3750	24	15	9	0	0	17	2	2	A;A	AUUUCUAACCA;UGAAUGCAAUA	10;31	23;1	dbr1_1;dbr1_2	27	20	8.10077	8.1152	14	2.1	5.73578	5.42257	GTAAGTATTAGGCTACACATATATTTCGTGTCTTTGGGGATGTACTGTGAACGATCTGTAATGTGCTATTCACTTTGTTTTTGAAGCTTTACCTTATTGATTTCATTTGATATCTTAAAGTGTGGCTCATAGTTCGCGTTTGTTTGCTCCCTAAAGAATATCGTGCTTGAAAAGTTTTATGAATGCAATAGTCAACGTTCATTTCTAACCATAATAG	UUCUAAC	UUCUAAC	10	23	AAUGCAA	31	1	NA	No	YES	No	No	No	NA	YES
I	256135	256344	210	-1	SPAC1639.02c	SPAC1639.02c.1:exon:13-SPAC1639.02c.1:exon:12	int_1159	2	1	1	0	0	2	1	2	A	UCUACUAACGG	18	2	dbr1_1;dbr1_2	5	3	5.754	6.11292	3	4	2.31659	2.02345	GTAAGTTTGAACTAAACACGATTTAAAGGGTGTTAGCAGATGATTTTGAAATGTCATGAGATGTGCAGTTTTGATGTGTTCAAAAAATCCATTTAGCAATGACAAAACCTTATAATTGAGAAAGGTTTTTATTTTCATCGCAACACACCTTCTTTCTATAGTTAGAAGATACACTTAAAAATGAATCTACTAACGGTTTATTTACTTTAG	UACUAAC	UACUAAC	18	2		NA	NA	NA	No	YES	No	No	No	NA	NA
I	2371966	2372102	137	1	SPAC22H10.02	SPAC22H10.02.1:exon:2-SPAC22H10.02.1:exon:3	int_510	206	111	94	1	0	104	2	3	A;A	CGUACUAACUU;GCGUACUAACU	15;16	161;45	dbr1_1;dbr1_2;wt_1	4	1	4.96395	4.94431	5	2	3.29207	3.77653	GTAGGTTTTAAAACAAATTGAAAATTATGTTCCTGAGTCAAGCCTGAAGTGCTCATTGCCATTACATTTCTGTTTTGTACCATATACTTTTTATTCATAGAGGAATAAAAGCGTGCGTACTAACTTTATTGGTTTAG	UACUAAC	UACUAAC	15	161		NA	NA	NA	No	YES	No	No	No	NA	NA
I	3942365	3942505	141	-1	SPAC2F3.18c	SPAC2F3.18c.1:exon:3-SPAC2F3.18c.1:exon:2	int_2051	12	7	5	0	0	11	2	2	A;A	UCAGCUAACUU;GUCAGCUAACU	15;16	11;1	dbr1_1;dbr1_2	176	77	4.61097	4.50503	17.7	6	6.49502	6.17733	GTATGTTTGATGAATATATTTTTCAGAAATAGTGAAAACTGCTTCAAGTATTCCATGAATTTGAGTGTAGCAGAAGGGTCTTCTATTCTTATTTATGGATTGGCTTAGTTATAAATAAGTCAGCTAACTTAAAATCTATAG	AGCUAAC	AGCUAAC	15	11		NA	NA	NA	No	YES	No	No	No	NA	NA
I	1282168	1282340	173	-1	SPAPB17E12.10c	SPAPB17E12.10c.1:exon:2-SPAPB17E12.10c.1:exon:1	int_1411	15	12	3	0	0	12	1	2	A	AUUGCUAACUA	9	15	dbr1_1;dbr1_2	8	11	6.78948	6.50413	4.5	12	3.28802	3.57984	GTAAGTTCAATTGTTAAAAGGGTCCCGTCGAAATGTCAACAGACGTCCGTTGCAAGGTATTCTTAGGAGCATACTGCATCTAAGAAACTGTCGTACATATTCCGTATATCTGCTGAACTTTTCAAGGTTCAATTAATATTTTTCTATGGAGTTGTTTATTGCTAACTATTAAG	UGCUAAC	UGCUAAC	9	15		NA	NA	NA	No	YES	No	No	No	NA	NA
II	2325119	2325233	115	1	SPBC24C6.04	SPBC24C6.04.1:five_prime_UTR:1-SPBC24C6.04.1:exon:1	int_2861	115	64	50	0	1	40	3	3	A;A;A	GAUAUUAAUAC;CGAUAUUAAUA;AAUACUUAUUA	11;12;5	110;3;2	dbr1_1;dbr1_2;wt_2	421	332	5.94785	5.95109	35.1667	30.2727	8.37341	8.19302	GTAAGTATTTATATCTATGTAATAACTGTTTTGAGTGAGACCCCTACGCGTCTTTTCATTGCTTTCTATCTTTAGGTTTTCTACGTTTTATTTATGCGATATTAATACTTATTAG	UAUUAAU	UAUUAAU	11	110	UACUUAU	5	2	NA	YES	YES	No	No	No	NA	NA
II	4030611	4030699	89	1	SPBC215.04	SPBC215.04.1:exon:1-SPBC215.04.1:exon:2	int_3292	6	3	3	0	0	6	2	2	A;A	GUUGCUAACUG;AGUUGCUAACU	12;13	5;1	dbr1_1;dbr1_2	3	7	2.35919	3.27903	2	4	2.72013	2.93795	GTAAGTGTTTTTACAGCAAATTTCATGACGTGAAACAAAAAATGCTTGATTTGATCTCAAAGTTTGAAAAGTTGCTAACTGAACTTTAG	UGCUAAC	UGCUAAC	12	5		NA	NA	NA	No	YES	No	No	No	NA	NA
II	4073766	4073870	105	1	SPBC1347.07	SPBC1347.07.1:exon:1-SPBC1347.07.1:exon:2	int_3298	51	29	22	0	0	25	2	2	A;A	UUUACUAAUAU;UUUUACUAAUA	8;9	47;4	dbr1_1;dbr1_2	2	1	1.24621	2.53802	1	2	-0.130028	-2.64549	GTATGTTTAGATTCAGTCTATCAAGTTATCATTTCTACAATTTACATGTTTAAGTTTCTTTTTGTCGATGTGTACCTCAGTTTTTAAACTTTTACTAATATAAAG	UACUAAU	UACUAAU	8	47		NA	NA	NA	No	YES	No	No	No	NA	NA
I	1054957	1055167	211	1	SPAC23C4.15	SPAC23C4.15.1:exon:2-SPAC23C4.15.1:exon:3	int_248	19	10	9	0	0	14	2	2	A;A	UUUGCUAAUGC;UUUUGCUAAUG	10;11	17;2	dbr1_1;dbr1_2	126	108	7.11586	7.06773	25.4	18.1667	6.5929	6.58688	GTATGTACATTTATTTAAATCCATCGTGATAATGGATTAAACAATCCGATTGATTATAGAAGCAAATTCTGTTGATATCTGCGTATATGTCCATAGACGCCGGTATTTATAAATCGGTTTACTCTTAATCTGCTTTCTAATTGATGAACATGCTTCTTCTAAACTTCCTTTATCAATTTTTTTTTAAAAACTGTTTTGCTAATGCGTTTAG	UGCUAAU	UGCUAAU	10	17		NA	NA	NA	No	YES	No	No	No	NA	NA
I	5373332	5373411	80	-1	SPAC4D7.14	SPAC4D7.14.1:exon:2-SPAC4D7.14.1:exon:1	int_2349	14	9	5	0	0	11	3	2	A;A;A	GUAACUAACUA;AGUAACUAACU;UCAUUGAAGUA	14;15;22	9;4;1	dbr1_1;dbr1_2	26	28	3.14102	3.04581	4.5	7.25	5.0695	5.08234	GTAATGAATCTGACAAAAATAAATGAAACCCAGATTTTACATTATTGAGAATCATTGAAGTAACTAACTATTTTTTTTAG	AACUAAC	AACUAAC	14	9	AUUGAAG	22	1	NA	No	YES	No	No	No	NA	YES
III	701392	701549	158	-1	SPCC16C4.18c	SPCC16C4.18c.1:exon:2-SPCC16C4.18c.1:exon:1	int_5026	96	58	38	0	0	50	2	2	A;A	UUCUCUAACAG;AUUCUCUAACA	16;17	90;6	dbr1_1;dbr1_2	20	9	5.94207	6.27641	7	2.5	4.49454	4.25742	GTAGGTTTCGTGAAAGTAGACTATGAGATTTTACTTTCTTTGGAAGAGGCTAAAATAACTAAAAAATTGTTGCTAGTTTTTTACGATGCCTTTCAATTTGCTAGATAGTCTGCTTTATTCTGACATTAAACATAATTCTCTAACAGTATTTGATTTAG	CUCUAAC	CUCUAAC	16	90		NA	NA	NA	No	YES	No	No	No	NA	NA
I	2638211	2638303	93	1	SPAC7D4.02c	SPAC7D4.02c.1:exon:2-SPAC7D4.02c.1:exon:3	int_559	10	6	4	0	0	8	3	2	A;A;A	UAAUCUAACGG;UUAAUCUAACG;CUAGUUAAUCU	12;13;17	8;1;1	dbr1_1;dbr1_2	11	12	5.15825	5.50318	6	6.5	4.38787	3.45317	GTATAGCAACAAATATGCAATTATTATTCTGATTCCAATAACACTTTATGTTATGCCTTCCTTCTCTAGCTAGTTAATCTAACGGTGTTATAG	AUCUAAC	AUCUAAC	12	8	AGUUAAU	17	1	NA	No	YES	No	No	No	NA	NA
I	2804122	2804387	266	1	SPAC1805.17	SPAC1805.17.1:five_prime_UTR:1-SPAC1805.17.1:exon:1	int_605	65	35	30	0	0	40	3	2	A;A;A	AUUUCUAACUU;AAUUUCUAACU;GUAAUUAAUCA	15;16;113	55;8;2	dbr1_1;dbr1_2	9	3	6.3809	6.03408	0.344828	0.2	6.20365	6.25226	GTAAGCACTTTGAACGCTCGTGTAGATACGTGTTATTTTCCTTGGTCTTCTTTTAGGAAGGATCTTGTTATCTTTCGATTTCCTGTTCTTCGATCTCTTGTTTGAGTTAATTATTGTTTTTTCTCTATTATTTTTGCAAGGGAGGAGTAATTAATCAGCAAGTAGGAGATTAAAAATTTATATTATTTTGTTTCTATTCGATAAAATTAATTTTTCTTCTACTTTTTTTTATTTTTTTTTTCAAATTTCTAACTTGATTGCTGAAG	UUCUAAC	UUCUAAC	15	55	AAUUAAU	113	2	NA	No	YES	No	No	No	NA	NA
II	187456	187580	125	1	SPBC1198.08	SPBC1198.08.1:exon:1-SPBC1198.08.1:exon:2	int_2376	26	12	14	0	0	19	2	2	A;A	AUGCCUAACAC;CAUGCCUAACA	11;12	24;2	dbr1_1;dbr1_2	241	161	7.25832	7.20931	26.8889	32.4	7.24118	6.92364	GTAAGTAAGGATCTTTCTTGAAGAAATTAAAGAAAAGTAGACAGTTGTTCAGAATTGCCAGAGGCAAGTCTTATTTCTTTATTTTATTGCAGATTTCAGAAAGCGACATGCCTAACACTTTATAG	GCCUAAC	GCCUAAC	11	24		NA	NA	NA	No	YES	No	No	No	NA	NA
I	3731809	3731892	84	1	SPAC15E1.09	SPAC15E1.09.1:exon:3-SPAC15E1.09.1:exon:4	int_786	125	64	61	0	0	37	3	2	A;A;A	AUUACUAAUAC;UAUUACUAAUA;GUUGUUUAUUA	15;16;22	116;8;1	dbr1_1;dbr1_2	25	18	5.09169	5.48443	1.13043	1.11765	4.91082	5.05063	GTATGAACCCAAATTTGTTTTCCTTGACCATTAATATTCTCGTTGGTTTTTCTCTGTTGTTTATTACTAATACATTATATAAAG	UACUAAU	UACUAAU	15	116	UGUUUAU	22	1	NA	No	YES	No	No	No	NA	NA
II	2382853	2383027	175	1	SPBC19G7.17	SPBC19G7.17.1:exon:4-SPBC19G7.17.1:exon:5	int_2879	115	69	46	0	0	30	3	2	A;A;A	UUUGCUAAUUA;UUUUGCUAAUU;CUAAUUAACUU	12;13;8	112;2;1	dbr1_1;dbr1_2	1244	756	9.35577	9.17971	41.5	44.5294	10.6119	10.1851	GTAAGTCATGCTACCGTTGGAGAAGACTTAGAATAGTAAGAGCTACTTAAAGTTTGTTGATTTAAACATACATTTTTTGTTCTCTTTCGCCTCAGATGAGGTTTTAAAATCCCTCCTTCTGAATTTTCCCGATTTAACCTAAATAAACATTTGACTTTTGCTAATTAACTTTCAG	UGCUAAU	UGCUAAU	12	112	AAUUAAC	8	1	NA	YES	YES	No	No	No	NA	NA
I	4405436	4405518	83	1	SPAC29E6.02	SPAC29E6.02.1:exon:4-SPAC29E6.02.1:exon:5	int_881	21	10	8	2	1	12	2	4	A;A	UGUACUAACUU;CUGUACUAACU	10;11	20;1	dbr1_1;dbr1_2;wt_1;wt_2	6	4	1.58541	3.09962	3.5	1.66667	5.13911	5.21942	GTATGTATCTACAACTATTGCATCTCTGTTTATGTTTTGTGTAAATATGTATTTTGGCTAATTTACTGTACTAACTTATTTAG	UACUAAC	UACUAAC	10	20		NA	NA	NA	No	YES	No	No	No	NA	NA
I	4443234	4443518	285	1	SPAC9E9.04	SPAC9E9.04.1:exon:1-SPAC9E9.04.1:exon:2	int_896	12	7	5	0	0	12	2	2	A;A	UAUGCUAAUAC;GUAUGCUAAUA	10;11	8;4	dbr1_1;dbr1_2	88	75	8.9172	9.01332	29.6667	38	6.24167	5.99603	GTAAGGATCACATTATAAATATTGTAAAAATAATTGGGTGTAAATTTTCAGTGTATCACTTCATCCTGATAGTAGATAGCTAGTTGCAATGAATGCGAAAAACAGATTCCACATCCTTTCTCGTAGGAAGATGGAATTATTCACTTTACGATTCTATAGAAAAATAGCTTAAAATGTTTATTATGCTTTGCATGGCAAATATATGTTGACTTTGATACCTGATTGATTTTTTCCTTCTTCCCATATCTTATTTTCCCTTCTTTTCTTGTATGCTAATACTTTTAG	UGCUAAU	UGCUAAU	10	8		NA	NA	NA	No	YES	No	No	No	NA	NA
II	632268	632395	128	-1	SPBC839.17c	SPBC839.17c.1:exon:3-SPBC839.17c.1:exon:2	int_3503	58	37	21	0	0	29	2	2	A;A	GUUACUAACAC;AGUUACUAACA	11;12	51;7	dbr1_1;dbr1_2	112	105	5.51504	5.74411	2.51111	2.46512	7.86091	8.05962	GTATGTATTTAATGTGTGATTTCACTTTAACTCTTTGTTACCAAAGGAGCTTTGCTTCTCCTTTTCTTAGGGTCTATAGTGAATTTGCTTACAATTTTATTCTAAATGCAGTTACTAACACCATTTAG	UACUAAC	UACUAAC	11	51		NA	NA	NA	No	YES	No	No	No	NA	NA
III	917867	917930	64	1	SPCC24B10.09	SPCC24B10.09.1:exon:1-SPCC24B10.09.1:exon:2	int_4570	5	4	1	0	0	3	1	2	A	AUUACUGACAA	11	5	dbr1_1;dbr1_2	0	0	8.78063	8.87675	0.166667	0.166667	-16.6096	-16.6096	GTAAGGCTTTCAATAGAATAGTTAAGAAACCGGTTTGAGGATAGAAATTACTGACAAAACATAG	UACUGAC	UACUGAC	11	5		NA	NA	NA	No	YES	No	No	No	NA	NA
I	4602982	4603146	165	-1	SPAC12B10.16c	SPAC12B10.16c.1:exon:2-SPAC12B10.16c.1:exon:1	int_2186	67	38	29	0	0	45	4	2	A;A;A;A	UAAUCUAACAA;CUAAUCUAACA;GUUUCUAAUCU;UGUUUCUAAUC	12;13;17;18	48;17;1;1	dbr1_1;dbr1_2	23	14	7.29918	7.42768	3.42857	2.14286	4.02281	3.68458	GTAAAACAAAATTTTTTTTAGGCTTATTTCAACCATAACTCGAATAGTCTTAGTAAGCCTGTGAACATGGATTTTATTCGACTTAAGAATATAAATCTACCTTACTGAGATTCTTTCGGAGAAATGGTGACAAATTCAAGTGTTTCTAATCTAACAATTATTTAG	AUCUAAC	AUCUAAC	12	48	UUCUAAU	17	1	NA	No	YES	No	No	No	NA	NA
I	2340276	2340391	116	1	SPAC6C3.09	SPAC6C3.09.1:exon:3-SPAC6C3.09.1:exon:4	int_501	72	51	21	0	0	27	1	2	A	AUUGCUUACAG	12	72	dbr1_1;dbr1_2	10	13	6.3184	6.6295	1.375	2.8	4.12756	4.22673	GTGAGTTATTTTACGGTACTGTTCGCTTTTCATATCTCTATAGGATATTATTACCCAGCCAAACAATTTCGGGTATCTTTAAGATTTTGAAATTTTTATTGCTTACAGTTAATAAG	AGUUAAU	UGCUUAC	12	72		NA	NA	NA	No	No	No	No	No	NA	NA
II	3309889	3309984	96	-1	SPBC17D11.03c	SPBC17D11.03c.1:exon:2-SPBC17D11.03c.1:exon:1	int_4094	22	14	8	0	0	17	2	2	A;A	GUAACUAACAA;UGUAACUAACA	12;13	18;4	dbr1_1;dbr1_2	16	17	2.96045	4.29179	8.5	18	6.31858	6.34238	GTATGATTATAATGATCATGTTTTCTTCGATTTCACTTCAGGTGATGCGAAGATAATAGTATTTTAGCAGCCAAACTGTAACTAACAAATTAATAG	AACUAAC	AACUAAC	12	18		NA	NA	NA	No	YES	No	No	No	NA	NA
I	4450846	4450925	80	1	SPAC9E9.08	SPAC9E9.08.1:five_prime_UTR:1-SPAC9E9.08.1:exon:1	int_897	29	11	18	0	0	18	2	2	A;A	CUUACUAACUG;GCUUACUAACU	9;10	24;5	dbr1_1;dbr1_2	6	2	2.22348	2.8048	3.5	1	3.65526	3.18524	GTATGTGGTATTCATACTAGAAAGAGATATGGTTTTTCGGCCTTATCTTCTCTGCATAATATTGCTTACTAACTGTTAAG	UACUAAC	UACUAAC	9	24		NA	NA	NA	No	YES	No	No	No	NA	NA
II	824661	824873	213	1	SPBC530.13	SPBC530.13.1:exon:2-SPBC530.13.1:exon:3	int_2503	23	10	13	0	0	16	1	2	A	AUAACUAACAC	10	23	dbr1_1;dbr1_2	4	2	5.85994	5.89837	5	3	3.33986	2.47967	GTATGTTATTTGGATGTCTTTCGCACATGAGTATGCTGTGCTATTTGAAATTTTACGTATTCTGATATAAGAATATTCTGAATGCTGTACATTGGTCATACTATTAAAAAAGACTACAGTTTTTAATAATGTTAGCTCAGCTACTCCAAGTTATAAACATCATATTCTCTTGATTTAGGCTCTTTTTCTTTCAAAAATAACTAACACATTTAG	AACUAAC	AACUAAC	10	23		NA	NA	NA	No	YES	No	No	No	NA	NA
III	2397738	2397983	246	-1	SPCP1E11.04c	SPCP1E11.04c.1:exon:2-SPCP1E11.04c.1:exon:1	int_5356	78	38	39	1	0	40	3	3	A;A;A	AAAACUAACAU;AAAAACUAACA;GUUUCUAAUUU	12;13;125	71;6;1	dbr1_1;dbr1_2;wt_1	18	27	8.51112	8.26975	3.8	4	5.66289	5.7082	GTATGTAAATTTTTGAGGCTGAAGTAGATATAATTCGGTCATTGCTTCGTTACGTGAAGATTTGTTAAATTTATTGAAACCTTTCCAAATTAGTGTTCTATTAAGAGTTTTTAAGTTTCTAATTTAAAGCGCTCATAACGTACATTTTATTTAGACAAGGAGTTTCTTCGGTTTGCAATGAAGTTGAGCCGAAAATCGAGCACAGCTTTCAATTTTAATATGTTTCAAAAACTAACATTTTACCAG	AACUAAC	AACUAAC	12	71	UUCUAAU	125	1	NA	No	YES	No	No	No	NA	NA
III	1927881	1928038	158	-1	SPCC74.02c	SPCC74.02c.1:exon:2-SPCC74.02c.1:exon:1	int_5249	197	117	80	0	0	49	3	2	A;A;A	UCUACUAAUUG;UUCUACUAAUU;GAAUUCUACUA	14;15;18	182;14;1	dbr1_1;dbr1_2	42	24	9.23347	9.27041	10.75	12.5	5.59102	5.6327	GTATGCAGGCTATTAAAGCGGGGATAGAGAGTTGGTCAATAATTTGAAATATTTGCCTCTACGGGCTGTAGCGAGTGATGTCTTGATTGCTTGTTCTCTCTTTTTTCTCTGCTATTTTTGATCCTTTCTCTTAGAATTCTACTAATTGTTGCCCTTAG	UACUAAU	UACUAAU	14	182	AUUCUAC	18	1	NA	No	YES	No	No	No	NA	NA
II	2340850	2340995	146	1	SPBC24C6.13	SPBC24C6.13.1:exon:1-SPBC24C6.13.1:exon:2	int_2863	30	20	10	0	0	20	2	2	A;A	CUCACUAACAU;UCUCACUAACA	20;21	27;3	dbr1_1;dbr1_2	10	8	8.36183	8.671	0.611111	0.473684	5.23236	5.30473	GTATGAATCGCCAAAATTGTAAATGAAATCTGGCTGGTATGAAATGAAACGAGAAATTCCGATTTTGCAATTCTCTTGAATTATTACCTTAAAGATCTCCATTACTTCTTTTTTTCTTTCTCACTAACATTGTTTTTCTGGATTAG	CACUAAC	CACUAAC	20	27		NA	NA	NA	No	YES	No	No	No	NA	NA
II	3805928	3806243	316	1	SPBC21C3.05	SPBC21C3.05.1:exon:1-SPBC21C3.05.1:exon:2	int_3254	46	23	23	0	0	23	2	2	A;A	AUUGCUAAUCU;UAUUGCUAAUC	11;12	43;3	dbr1_1;dbr1_2	10	4	7.48533	7.26438	2.75	1	3.92545	3.3168	GTATGTTTAAAAACCACTGAATTCTGAAAATTTGAGTGCTGAATGTCAATTATAATTACCGATGAATTAATCGTGTAAAGTAAGACATGTACGTATGTTACATATTATTGAAGTTTATTAGTAGTTGCTGTTAAATTCGCTAACTATAACAACTAAAATAACAACAATAATAAATGAAAAGGATTTGCTTTCTACTTCCTTGTTTGCTGTTTTGCATGTTACACTAATTGGACATCTTTTTTTTACCCTGTCAATCACCTTGAAGCTTCCTCCTCAAACTCTTTGCGATGATATTTCTATTGCTAATCTCTTATAG	UGCUAAU	UGCUAAU	11	43		NA	NA	NA	No	YES	No	No	No	NA	NA
I	2281240	2281307	68	1	SPAC4G9.14	SPAC4G9.14.1:exon:5-SPAC4G9.14.1:exon:6	int_483	4	3	1	0	0	4	1	2	A	UUUGCUAACAU	10	4	dbr1_1;dbr1_2	9	10	2.45795	2.74976	2	2.75	3.29302	3.19781	GTAAGGAATCTCTTTGACATTTGCACCAGCTGCCTTAAATTATTATAGTCATTTGCTAACATATTTAG	UGCUAAC	UGCUAAC	10	4		NA	NA	NA	No	YES	No	No	No	NA	NA
III	1778271	1778366	96	1	SPCC1442.06	SPCC1442.06.1:exon:1-SPCC1442.06.1:exon:2	int_4721	30	15	15	0	0	22	2	2	A;A	AAUACUAACAU;AAAUACUAACA	12;13	22;8	dbr1_1;dbr1_2	60	49	4.46295	4.29179	4.69231	4.54545	7.46882	7.42483	GTACTACATAATCATGGGTTCTAAAATAATATAACCTGTGTATTCCCTTTGGAAGCGTTTTTTGTTTTTGTGTTATAAATACTAACATAATTATAG	UACUAAC	UACUAAC	12	22		NA	NA	NA	No	YES	No	No	No	NA	NA
I	1457542	1457638	97	-1	SPAC9.02c	SPAC9.02c.1:exon:2-SPAC9.02c.1:exon:1	int_1458	17	10	7	0	0	16	4	2	A;A;A;A	UUAACUAAACG;CAGAUUAACUA;AUUAACUAAAC;CCAGAUUAACU	12;16;13;17	8;6;2;1	dbr1_1;dbr1_2	141	107	5.00439	4.99812	17.75	21.6	6.15489	5.90499	GTAAGTGGATTCTGAGACATTCTCATTGTTAGTTATCTTGTCAATGATTTGTCTACGCTTGTTTTTCGAATAGCCAGATTAACTAAACGCTCAATAG	GAUUAAC	AACUAAA	12	8	GAUUAAC	16	6	NA	No	No	No	No	No	YES	NA
II	434992	435282	291	1	SPBC582.09	SPBC582.09.1:exon:2-SPBC582.09.1:exon:3	int_2422	24	10	13	1	0	18	3	3	A;A;A	UUUACUAAUUA;UUUUACUAAUU;AGUUUUUACUA	12;13;16	21;2;1	dbr1_1;dbr1_2;wt_1	296	157	8.64542	8.49365	74.25	39.5	8.67805	8.05503	GTAAGTATTCAATTTCGTTACGATAAATTATTGTGATTACAATCAACCAAGCCATACTGTTATACTAAGATAATCGTATGCGTCCAATCTTATTTCTTTAGCAGAGAAGCAGTAAACTGAACGGAGTATCCAACCTACTTATTTTTTTTTAAATAAATTTTCAATGATAATTAGAATAATATGTTCAGGGCTTGCTTTAATTAGGATGGATTGTGCAGGTTCTGCTGTACAAACGGTTTAATTGATTATCCACTTGTTTTGCTGGAATAGTTTTTACTAATTATGCGCTAG	UACUAAU	UACUAAU	12	21	UUUUUAC	16	1	NA	No	YES	No	No	No	NA	NA
II	230680	231496	817	1	SPBC660.16	SPBC660.16.1:exon:3-SPBC660.16.1:exon:4	int_2390	30	19	11	0	0	24	2	2	A;A	UAUGCUAACAU;AUAUGCUAACA	12;13	24;6	dbr1_1;dbr1_2	60	41	9.81739	9.69235	8.71429	3.23077	5.99019	5.91523	GTAAGTTTTGTGTAATGTTCTGGATTTTGGTTTGATGGCTCGAAGGATGCATAATGTACAAAGACATAATAAAACATTTGTATCGAAGTGAAAGCAAGCAAAGACAGGTTTCTTTCTTTATTAGAAATGCTATTTCTTTCCCATTTTCTACTCTTCAATATGGCATAACACATAGCTATGGGAAAATGTCTTTTTTTTAAATATATATTTTTCTCTTGCTTTCGGGTTTGCTCCTTCAAAACCTGTTTGTAATCGATGCGGTTTCACTCTCGATTTCTTTGCAACCATCCGTTGTGTCGGGCATGTGTATTCTTACAATGTTTTTGCTCTGTTGGTATAACGTTTGCATAGCTATTGCGTTATTCCACTGCGCTACGTTGTAAGGTGAGTCGCGTGTGT…	UGCUAAC	UGCUAAC	12	24		NA	NA	NA	No	YES	No	No	No	NA	NA
III	684948	685048	101	1	SPCC16C4.22	SPCC16C4.22.1:exon:1-SPCC16C4.22.1:exon:2	int_4517	8	5	3	0	0	8	1	2	A	AAAGCUUACCU	18	8	dbr1_1;dbr1_2	2	0	3.17671	2.81644	0.5	0.166667	3.39511	3.62722	GTATGTGTGTTGTTGATAAATCAGCTATCTGGGCGACTTAGCACCATTTTGATTGCATAAAAGAAAAAGAAAAATAAAAGCTTACCTATTTTATGATTTAG	UUUUGAU	AGCUUAC	18	8		NA	NA	NA	No	No	No	No	No	NA	NA
I	3441796	3441923	128	-1	SPAC3A11.13	SPAC3A11.13.1:exon:4-SPAC3A11.13.1:exon:3	int_1909	69	40	29	0	0	22	2	2	A;A	UUUAUUAAUUC;UUUUAUUAAUU	14;15	68;1	dbr1_1;dbr1_2	54	46	4.69741	5.20646	3.66667	3.91667	5.73163	5.69587	GTATGTTTGTTGAAATTTGAAAAAGAAGAATTTCCTTGAGGTTAAAATCGCTCTCTAAAAATGCGAGTTGTACTTCTTCATTTGTATTATCGAATTGCGTATGTCATTTTATTAATTCATAATTATAG	UAUUAAU	UAUUAAU	14	68		NA	NA	NA	No	YES	No	No	No	NA	NA
II	1834450	1834578	129	-1	SPBC9B6.11c	SPBC9B6.11c.1:exon:2-SPBC9B6.11c.1:exon:1	int_3741	16	10	6	0	0	14	3	2	A;A;A	UUUAUUAACUG;UUUUAUUAACU;GUAUGAAAAAN	12;13;123	13;2;1	dbr1_1;dbr1_2	294	175	7.37828	7.38739	147.5	176	6.74487	6.37174	GTATGAAAAAAAATTTTCGTTCATCTAGTCGAGCAACAATAAGAAGGTTGTTGTGAAACTTTTTTTAAGACCGAATCTCTACTCCTTTGTTTAATTTTTTGTTGCTCAATTTTATTAACTGATTATTAG	AACUGAU	UAUUAAC	12	13	AUGAAAA	123	1	NA	No	No	No	No	No	NA	NA
I	922748	922892	145	1	SPAC1687.11	SPAC1687.11.1:exon:3-SPAC1687.11.1:exon:4	int_199	50	26	24	0	0	24	1	2	A	UUUAUUAAUGC	13	50	dbr1_1;dbr1_2	113	79	6.59218	6.77741	19	20	6.61524	6.57907	GTAAGTAATTGATATGCTGCAGGAAGCGGTTAAACGGGTGCAACTATTCTTGTTTCACTTGCAATCTTAGAAATTTGATTGAACTGATTAGAATATTTGTTGCCCATATTGGTTTTTGTCGAATTTTTATTAATGCATTGAGCAG	AACUGAU	UAUUAAU	13	50		NA	NA	NA	No	No	No	No	No	NA	NA
II	1759861	1760084	224	-1	SPBC11G11.02c	SPBC11G11.02c.1:exon:3-SPBC11G11.02c.1:exon:2	int_3719	45	26	19	0	0	41	2	2	A;A	AUUUCUAACCA;CAUUUCUAACC	8;9	32;13	dbr1_1;dbr1_2	41	21	8.02037	7.78772	2.8	4.4	5.24352	5.05432	GTATGAAACCACTTACTTTACTCATGAATGAACCTGTGAAGCATGGATTAAATAAATGTAAAAAGATGGAATAAGATATGAATGATTTAAGAAGACGGCGCTTGCGTAAAGCCTTCATTTTTTCTTTTATCCCTTCCACTTGTTTGATTGTTTTTATTGTGAAAGGCTACCTTTGGTTTTTAGGGTTTCTTTTTTTGTCTATTTTCATCATTTCTAACCATTAG	UUCUAAC	UUCUAAC	8	32		NA	NA	NA	No	YES	No	No	No	NA	NA
II	2592847	2592962	116	-1	SPBC2G5.07c	SPBC2G5.07c.1:exon:1-SPBC2G5.07c.1:three_prime_UTR:1	int_3891	16	11	5	0	0	14	4	2	A;A;A;A	GGUUCUAAUUA;AAAGAAAAACU;UGGUUCUAAUU;AAGAAAAACUU	10;26;11;25	12;2;1;1	dbr1_1;dbr1_2	0	0	8.47606	8.82473	0.333333	0.125	2.40269	2.55534	GTAAGTATAAGTCTGCTCACTTTATTTCATATGCCAATTCGCATTATCAATACGAAAGGCTGTCAGGATAGTGATTCAGTGGAAAAGAAAAACTTAAATGGTTCTAATTAGATTAG	UUCUAAU	UUCUAAU	10	12	GAAAAAC	25	1	NA	No	YES	No	No	No	NA	NA
I	3430344	3430634	291	-1	SPAC3H5.07	SPAC3H5.07.1:exon:2-SPAC3H5.07.1:exon:1	int_1908	96	53	43	0	0	37	2	2	A;A	UUUACUAAUUC;UUUUACUAAUU	12;13	92;4	dbr1_1;dbr1_2	920	921	10.2528	10.2031	40.0435	40.087	11.04	11.1973	GTAAGTTTAACACCCACTTTTGCTTAAAGCTTTTACGGTTAGCAAATATGGTAAACGAAGCACGATTGTTTTTTTCTGCATTAATTCTAAGATGTTTGAATAAAAAAATCGAGTAAATGGCTGATGAAAGGATGTTTTGGGTTGATTTTGCAGTTTAATTACTCTTGTACTCCTTTTATTAGATGGTACTATGAGAACCGTTTACTTAAAACGTAGTTAGTGTTAAGTTCACCATACTATGCAATCTGAAATAATTTAGTCAATTTGAGATTTTTACTAATTCAAACCTAG	UACUAAU	UACUAAU	12	92		NA	NA	NA	No	YES	No	No	No	NA	NA
I	2675399	2675555	157	-1	SPAC4F8.01	SPAC4F8.01.1:exon:3-SPAC4F8.01.1:exon:2	int_1747	106	62	42	0	2	45	2	3	A;A	AGAACUAACUU;UAGAACUAACU	12;13	104;2	dbr1_1;dbr1_2;wt_2	84	61	5.40279	5.32687	85	62	7.22299	7.19009	GTAAGATTACACTAACCCCATTGTTTATTTCTTCTTTCTGATTTATGGAAGCCGTAAATAATCAATTGAGGATCTTCTGGGTTTTAAAAGAAAAGAATTTCATAATGACTTTCCTTTCACCTTAATATCGAAAAATATAGAACTAACTTTTACAAAG	AACUAAC	AACUAAC	12	104		NA	NA	NA	No	YES	No	No	No	NA	NA
III	591068	591182	115	-1	SPCC1672.12c	SPCC1672.12c.1:exon:5-SPCC1672.12c.1:exon:4	int_4983	8	6	2	0	0	4	1	2	A	CUUACUAAUGA	11	8	dbr1_1;dbr1_2	109	75	5.00573	5.01163	22	25.3333	6.44545	6.16927	GTAAGTGCCTATTTATCTGTATGGATTATATATGGACGGCGTGAATGATAACGATCGATTCTTCGCCCTTTTATCCTACATACTGTCTTTTTTTTTACTTACTAATGATGAATAG	UACUAAU	UACUAAU	11	8		NA	NA	NA	No	YES	No	No	No	NA	NA
III	1832743	1832913	171	1	SPCC285.17	SPCC285.17.1:exon:3-SPCC285.17.1:exon:4	int_4740	21	13	8	0	0	17	2	2	A;A	UAAGCUAACUU;CUAAGCUAACU	13;14	19;2	dbr1_1;dbr1_2	136	79	7.30193	7.29929	68.5	20	6.64651	6.34537	GTAAGTTAATCATGGATGGGTTCACAATTGTTTTAAGGAGGTTTGTCAACAAACTTTTACTTTGTCGATTGTAACTTTCCTTGTCTACTTTTTTCATTTGGTTACTTGTGGAAAACATTCCGCATTGCTCTTTGTTACCTGCTGCCGAAGCTAAGCTAACTTAATTAATAG	AGCUAAC	AGCUAAC	13	19		NA	NA	NA	No	YES	No	No	No	NA	NA
II	3684929	3685094	166	-1	SPBP8B7.24c	SPBP8B7.24c.1:exon:3-SPBP8B7.24c.1:exon:2	int_4194	196	109	87	0	0	73	5	2	A;A;A;A;A	ACUGCUAACUU;AACUGCUAACU;UAAACUUAACU;AAACUUAACUG;AAGUCUGACCU	9;10;17;16;56	173;14;5;2;2	dbr1_1;dbr1_2	28	26	8.40239	8.54256	2.9	3.85714	5.49679	5.7473	GTAAGTAGAGTCTGGTGGTCAAAGAGAACAGGTTTCAGAGCAAAATAGTGGTGAATTGAACAACACCCATTGTTTTTGTCATCAAAAGTGAATCCATTGTTACAAGTCTGACCTTTTTCTTTCAAAAATACAAATTACGTTTTAAACTTAACTGCTAACTTAACAG	UGCUAAC	UGCUAAC	9	173	GUCUGAC	56	2	NA	No	YES	No	No	No	NA	NA
I	3884688	3884843	156	1	SPAC926.02	SPAC926.02.1:exon:1-SPAC926.02.1:exon:2	int_816	8	4	4	0	0	8	2	2	A;A	AAAACUAACAA;UAAAACUAACA	11;12	6;2	dbr1_1;dbr1_2	8	5	3.89744	4.05432	4.5	6	5.36385	5.27715	GTATGTACAAAGCTATAATGGTGAATTTCAAAAACGTTTGAACATGATCATTCATACGAATTGTAATATTAGTTTTGAGAAACAAATAGAATTTACGCTTTTTTGCGCCGAGTTCTCAATACTTGAGCACGTGAAATTAAAACTAACAAGCAATAG	AACUAAC	AACUAAC	11	6		NA	NA	NA	No	YES	No	No	No	NA	NA
III	1973428	1973662	235	-1	SPCC18.09c	SPCC18.09c.1:exon:2-SPCC18.09c.1:exon:1	int_5258	4	4	0	0	0	2	1	1	A	UUUACUAAUCU	17	4	dbr1_1	20	18	7.43855	7.29063	10.5	19	3.5946	3.23434	GTAAGTCAATTTTCATTAAAGCTCAGAATTCCCTATTTAGTAACAAGTAATTGCTCATATTTCACCTTAGAAAACTTATTGGATATTCAGTATACCGAATGCATCTAAAAAGTCGCTTGAATTGGTTGATGTTTTTTTTTGGTAGAATGGAATACCCAGGATTGCTAGTTGTTTGAAAAGAAATCAGCTTAATTTTTTTGAAATAAATCTTTTTACTAATCTTGTTTTTGCATAG	UACUAAU	UACUAAU	17	4		NA	NA	NA	No	YES	No	No	No	NA	NA
I	3460561	3460641	81	-1	SPAC3A11.06	SPAC3A11.06.1:exon:4-SPAC3A11.06.1:exon:3	int_1919	26	13	13	0	0	20	2	2	A;A	UCUUCUAACUA;UUCUUCUAACU	13;14	21;5	dbr1_1;dbr1_2	11	7	0.0356487	-0.672529	12	4	3.16677	3.15693	GTAAGCTCTCCGAATTGTTTGGATATCTTTTCCATACAGTTATTTTCCTTTTCTCTTTCTTTCTTCTAACTAGTTCGAAAG	UUCUAAC	UUCUAAC	13	21		NA	NA	NA	No	YES	No	No	No	NA	NA
II	1513521	1513582	62	-1	SPBC83.02c	SPBC83.02c.1:exon:2-SPBC83.02c.1:exon:1	int_3690	12	4	6	0	2	12	2	3	A;A	AUUUCUAACGU;UAUUUCUAACG	14;15	7;5	dbr1_1;dbr1_2;wt_2	2304	1955	7.73417	7.72433	20.5804	32.6	11.037	11.0658	GTATGTATTAGTCATTGGGATCTTTAGATTTGTGTGGAATTATTTCTAACGTTTATGTATAG	UUCUAAC	UUCUAAC	14	7		NA	NA	NA	No	YES	No	No	No	NA	NA
III	2328364	2328462	99	-1	SPCC1494.04c	SPCC1494.04c.1:exon:2-SPCC1494.04c.1:exon:1	int_5336	16	10	6	0	0	13	2	2	A;A	CCUUCUAACAU;ACCUUCUAACA	13;14	13;3	dbr1_1;dbr1_2	110	81	4.67687	4.8453	27.75	11.7143	5.30893	5.4019	GTAAGTAAATAATTTTTGTTCTACAATCTACAATTAGCTCTCCTTTTCAAAGTGCCTTTAGGGACTTTTTCTATTAGCACCTTCTAACATCATAAATAG	UUCUAAC	UUCUAAC	13	13		NA	NA	NA	No	YES	No	No	No	NA	NA
III	2204869	2204965	97	1	SPCC1919.01	SPCC1919.01.1:exon:2-SPCC1919.01.1:exon:3	int_4829	18	12	6	0	0	13	2	2	A;A	UUCACUAACAA;UUUCACUAACA	11;12	17;1	dbr1_1;dbr1_2	38	34	3.86304	4.65235	39	17.5	5.03635	4.73959	GTATGTCAATTTTATAAATTTTGCGCGTGTGAACATTCGAATCTTGCATGCCAAATAAACTAGATCATTTATTTTCAATTTCACTAACAACAATTAG	CACUAAC	CACUAAC	11	17		NA	NA	NA	No	YES	No	No	No	NA	NA
III	1789718	1789804	87	1	SPCC1442.12	SPCC1442.12.1:exon:1-SPCC1442.12.1:exon:2	int_4726	78	37	41	0	0	29	2	2	A;A	AAUACUAACUA;AAAUACUAACU	15;16	72;6	dbr1_1;dbr1_2	16	18	4.66046	5.33288	5.66667	9.5	3.36603	3.05377	GTATGATTTACGTATTCTTGTTTACACCATTGCGAAAGGACTTTGCAAAAGGATTCATTACTTGAAATACTAACTAGAGGATTGTAG	UACUAAC	UACUAAC	15	72		NA	NA	NA	No	YES	No	No	No	NA	NA
I	3241571	3241654	84	-1	SPAC6G9.01c	SPAC6G9.01c.1:exon:3-SPAC6G9.01c.1:exon:2	int_1871	17	12	5	0	0	11	3	2	A;A;A	AAUACUAAUAC;UAUACUAAUAC;UAAUACUAAUA	10;16;11	13;3;1	dbr1_1;dbr1_2	46	41	2.4426	3.27498	15.6667	21	4.51718	4.17673	GTAAGTAACTTATTCATTGCATTTAAAAACTTTTCCATGGCATTTTTTCTCTTGCTAGCTCTATACTAATACTAATACCTTAAG	UACUAAU	UACUAAU	10	13	UACUAAU	16	3	NA	No	YES	No	No	No	NA	NA
III	2192256	2192448	193	1	SPCC830.06	SPCC830.06.1:exon:1-SPCC830.06.1:exon:2	int_4819	31	20	11	0	0	23	2	2	A;A	UCGGCUAACGU;CUCGGCUAACG	17;18	25;6	dbr1_1;dbr1_2	29	25	6.08224	6.22459	6	2.88889	4.39624	4.36613	GTAAGTTTGATGCTTAGTACGTGTGGCCAAAAGTGTTCTTATCATTATATTTTTTCATGTTAGAATACTTACATCTCTTGTCGTCTATTTCTTTTTAAGATTATAGCCAATTCATCAAAGTTGCCGGTTTCACATGCACAATGCAAAAGTATTAGCACCTCAAAGCGACTCGGCTAACGTTCATTGTATCTAG	GGCUAAC	GGCUAAC	17	25		NA	NA	NA	No	YES	No	No	No	NA	NA
I	351200	351294	95	1	SPAC630.03	SPAC630.03.1:exon:3-SPAC630.03.1:exon:4	int_33	22	12	10	0	0	13	2	2	A;A	UUUACUAACUG;UUUUACUAACU	15;16	20;2	dbr1_1;dbr1_2	24	13	7.49213	7.90157	6.25	2.33333	7.29919	7.13587	GTATGTATAAAAAATCTAATACGAGCTTAGATAAACAGTTTTGAACATTAAATGCATATATATATGCCCGAATTTTACTAACTGATAAACCTTAG	AACUGAU	UACUAAC	15	20		NA	NA	NA	No	No	No	No	No	NA	NA
III	740882	740972	91	-1	SPCC18B5.11c	SPCC18B5.11c.1:exon:2-SPCC18B5.11c.1:exon:1	int_5045	60	33	27	0	0	31	2	2	A;A	UUAUCUAACGA;AUUAUCUAACG	14;15	54;6	dbr1_1;dbr1_2	9	4	7.40685	7.76683	3.33333	2.5	5.78187	5.89068	GTATATAAAATAATAGTGGCCAGCTGAACTCGTTTAGTTTTAATTGAACTTCAATCTCTTTAAGACATAATTATCTAACGAAATGACCCAG	AUCUAAC	AUCUAAC	14	54		NA	NA	NA	No	YES	No	No	No	NA	NA
I	5368092	5368217	126	1	SPAC4D7.09	SPAC4D7.09.1:exon:2-SPAC4D7.09.1:exon:3	int_1115	124	69	54	0	1	58	2	3	A;A	AAUGCUAACCG;AAAUGCUAACC	15;16	111;13	dbr1_1;dbr1_2;wt_2	85	65	6.1193	6.17383	86	22	5.24753	5.53352	GTATGATTTATTTTTATGTATAAGTAGATATGCATGTGTTCTTAGACTTTTTGATCTTTTCTCTCTCATTCTGCAATTTAATTACTCGTCTTAAAGTCACAAAAAATGCTAACCGATACCCACCAG	UGCUAAC	UGCUAAC	15	111		NA	NA	NA	No	YES	No	No	No	NA	NA
I	1135062	1135194	133	-1	SPAC56F8.05c	SPAC56F8.05c.1:exon:5-SPAC56F8.05c.1:exon:4	int_1378	139	87	52	0	0	52	2	2	A;A	UUUCCUAACCU;UUUUCCUAACC	12;13	113;26	dbr1_1;dbr1_2	184	128	6.2802	6.51288	46.25	32.25	6.92864	6.70719	GTAAGTCAAAATTTTTTTTGGTTTTAATTGCCTTGTTGTTATTTTTATTAGGAAAAATTTTGTTTGCAATTTGTTCAGGCATACCAAAAAAAGATGTAGACTGTTTTTTATGCTTTTCCTAACCTGTACGCAG	UCCUAAC	UCCUAAC	12	113		NA	NA	NA	No	YES	No	No	No	NA	NA
II	2105657	2105871	215	1	SPBC23G7.05	SPBC23G7.05.1:exon:1-SPBC23G7.05.1:exon:2	int_2803	10	5	5	0	0	9	1	2	A	UAAACUAACAU	11	10	dbr1_1;dbr1_2	443	369	7.27834	7.41895	88.8	92.5	8.54294	8.43609	GTAAGTTATTATAGGGAATCGACTTTTTTATCGAAATTTTTGCTTGTCCGCATGTTTGATATTTCATAAGTTAGTTATTATATCACAAATAGTTGAGGTTGTAAATTACAACAGTATACTAAAAGTTACAATCGATTATTCCAGCTTTATCAAAATTTGGATTAAAAGTCTTTTTTACCTGCTTCCGTCAGGGTTCCTAAACTAACATGTGTTAG	AACUAAC	AACUAAC	11	10		NA	NA	NA	No	YES	No	No	No	NA	NA
III	1037071	1037293	223	-1	SPCC1259.02c	SPCC1259.02c.1:five_prime_UTR:3-SPCC1259.02c.1:five_prime_UTR:2	int_5096	25	17	8	0	0	18	3	2	A;A;A	GUAACUAACAU;UGUAACUAACA;GUUAUGUAUGU	17;18;26	20;4;1	dbr1_1;dbr1_2	11	5	8.40034	8.74522	0.6	0.26087	4.54461	4.78443	GTAAGGCCATTACTTTCTTTTTCCTGATACGAAATGGTTGAAATGTATCCATATTTTCCTATATCCTGCTATATGGGTGTCATGGAGGCAGCGGCTGTCGATTACTTCCAGGATTTTAAAATCCATTTTACGAGTACCGTTGACATTGTCGATCCGTAAACCAGGACAATATAATAAAAGAAAACTGCCAGTTATGTATGTAACTAACATTTTTTTTTTTTAG	AACUAAC	AACUAAC	17	20	UAUGUAU	26	1	NA	No	YES	No	No	No	NA	NA
II	2960703	2960809	107	-1	SPBC2A9.14	SPBC2A9.14.1:exon:2-SPBC2A9.14.1:exon:1	int_3988	5	3	2	0	0	5	1	2	A	GUUGCUGACUC	14	5	dbr1_1;dbr1_2	75	57	5.32052	4.75872	12.6667	58	4.08458	4.01821	GTAAGTACTTAGAATCAAATTTTATTACTTTTTCTTTTCTTCCTTTATTCCCTTTGTCTTATTAGTATGTATGTTGGACATTAAAAGTTGCTGACTCCTTTCTTTAG	UGCUGAC	UGCUGAC	14	5		NA	NA	NA	No	YES	No	No	No	NA	NA
II	3227272	3227353	82	-1	SPBC21.07c	SPBC21.07c.1:exon:2-SPBC21.07c.1:exon:1	int_4064	16	11	5	0	0	11	2	2	A;A	CGUACUAAUAG;ACGUACUAAUA	16;17	12;4	dbr1_1;dbr1_2	2	1	1.82529	2.47967	3	2	2.93254	3.1131	GTAAGTCTTATGTGTATAAATTGTGTAGCAAGACGAGCTCTATCCTATTTCAAAAACGACGTACTAATAGTTCAATTGATAG	UACUAAU	UACUAAU	16	12		NA	NA	NA	No	YES	No	No	No	NA	NA
I	401872	401971	100	-1	SPAC31A2.07c	SPAC31A2.07c.1:exon:2-SPAC31A2.07c.1:exon:1	int_1202	20	7	13	0	0	18	2	2	A;A	UUUUCUAACUU;UUUUUCUAACU	12;13	18;2	dbr1_1;dbr1_2	12	18	3.25519	4.8048	13	9.5	5.67871	5.47954	GTATGTTAACTTCGTGATTACTTGCCATAAGGTCACTTTGCATTATGCTTCAAGACACTGTAATCTAAATTACTTTGATATTTTTCTAACTTAATTATAG	UUCUAAC	UUCUAAC	12	18		NA	NA	NA	No	YES	No	No	No	NA	NA
III	1476194	1476524	331	1	SPCC188.02	SPCC188.02.1:exon:3-SPCC188.02.1:exon:4	int_4670	17	9	8	0	0	13	1	2	A	UUUACUAACCU	14	17	dbr1_1;dbr1_2	35	18	7.29597	7.30504	18	19	5.93323	5.49569	GTATGTTTTATGGATACACTTCATTGATTGTTTTAAGTAGTTATAAAAGATTTTGTTTCTTATTAGAATGTCATGAAATTGGATGGTGTTCAATGCGGCACATGCTGGTGTCGCTTGTGGATTTACTGTTCAGCTTGATGTGTCTGATATCGAAAAAGGAATCCTTCCATTTTTTCTCACATTTCATTTTATTTTACTAAGAGATGATTTAAACCACAAACATTGAATAGGATTTTCTTTCTGATTTAATGTACTTGGTGTTGACAAACACTGAGGTGTTATCAATATACTTTGTTGTCAACCAATTTAATTTACTAACCTGTCTATTTAG	UACUAAC	UACUAAC	14	17		NA	NA	NA	No	YES	No	No	No	NA	NA
II	4005866	4005940	75	1	SPBC3B9.10	SPBC3B9.10.1:exon:5-SPBC3B9.10.1:exon:6	int_3286	21	7	10	1	3	17	2	4	A;A	UAUACUAACUC;CAUUUUAAAGN	13;3	20;1	dbr1_1;dbr1_2;wt_1;wt_2	24	20	4.57293	4.48287	0.735294	0.913043	6.17618	6.34246	GTAGGACACAGATAGACATTATTATAGTGATATGAATCGTCATGTAATGATCTTTTATACTAACTCATTTTAAAG	UACUAAC	UACUAAC	13	20	UUUUAAA	3	1	NA	YES	YES	No	No	No	NA	NA
II	4000857	4000962	106	-1	SPBC3B9.07c	SPBC3B9.07c.1:exon:2-SPBC3B9.07c.1:exon:1	int_4255	12	9	3	0	0	8	2	2	A;A	AAUGCUAACUA;AAAUGCUAACU	11;12	7;5	dbr1_1;dbr1_2	128	138	5.80744	6.11929	43	139	8.23671	8.11415	GTATGAAATGCTTAGAAATTCGAGATTCTATGATGGATTTGTATCATGATAATTCAGTCGTGCAAAATTTTATACCAACTCCAAAATAAATGCTAACTATCACTAG	UGCUAAC	UGCUAAC	11	7		NA	NA	NA	No	YES	No	No	No	NA	NA
II	452417	452596	180	-1	SPBC428.06c	SPBC428.06c.1:exon:5-SPBC428.06c.1:exon:4	int_3449	23	12	11	0	0	14	2	2	A;A	CUUGCUAACUC;GCUUGCUAACU	18;19	21;2	dbr1_1;dbr1_2	6	5	6.11245	6.21436	1.75	6	2.56813	2.63755	GTAAGTCGTACACACACTTAGTTATGTTAGACATACAATTTTTTTGATTCATTGTGCTTTTGGAGATTTCGTGTTGTGTTTTCAAAGATTGATTATGAATTGAATTGAAATATTAGTTATCAGCACTCGCCAATCATGGTCATATACATCGATCGCTTGCTAACTCAGTAAAAATTATAG	UGCUAAC	UGCUAAC	18	21		NA	NA	NA	No	YES	No	No	No	NA	NA
II	4375963	4376061	99	1	SPBC1539.08	SPBC1539.08.1:exon:1-SPBC1539.08.1:exon:2	int_3357	59	40	19	0	0	35	2	2	A;A	UUUAUUAACAU;UUUUAUUAACA	9;10	51;8	dbr1_1;dbr1_2	9	8	5.26969	6.00373	1.25	1.5	4.09538	4.0305	GTATGTTTTTTATTCGGATGGATTTTTACAGTCTTCATTCCGTATAATCGTGCTTAACTTGGTGTTTTAATAATGGTAACTCTTTTATTAACATTTTAG	UAUUAAC	UAUUAAC	9	51		NA	NA	NA	No	YES	No	No	No	NA	NA
I	1554293	1554380	88	-1	SPAC167.04	SPAC167.04.1:exon:2-SPAC167.04.1:exon:1	int_1482	198	77	121	0	0	46	2	2	A;A	UAUUCUAAUAU;GUAUUCUAAUA	18;19	187;11	dbr1_1;dbr1_2	33	20	4.74894	4.98923	4.85714	4.2	5.41988	4.98923	GTACGTTCATTCCCTTAGATAATAGGGGTTATGTTAGCATCTACGGACTATGTTTTCTGAAAGTATTCTAATATATTTAATTTTTTAG	UUCUAAU	UUCUAAU	18	187		NA	NA	NA	No	YES	No	No	No	NA	NA
II	3663207	3663905	699	-1	SPBP8B7.16c	SPBP8B7.16c.1:exon:3-SPBP8B7.16c.1:exon:2	int_4192	41	30	11	0	0	27	2	2	A;A	AUUACUAACUU;CAUUACUAACU	11;12	35;6	dbr1_1;dbr1_2	17	39	9.5392	9.35786	4.5	8	5.41329	5.93458	GTAAGTTTTTATTTAACAGTTTTTTCCTTTTCGCAGGCTTTTTTATTTGACGTTATACTTTCACCGGCGTTCTCAATGTCTCTTTTGATAATAAAAGATGGACTGGCGATCAACACCATTTTAGCTTGAATTTTGCAAGTTTGTGTTGCTTTGATGAATATTTTTGTTTACGCCCAGTCTTAAGGAAAGTAGAAAATTCGGATGATTGTTTAGCCTGTTTCTTACAGGCACGAATGGTGTTACAAAGAGAAACTGATGATTTCTATTTCATGATCTTGGCCTTTTCAATAGTAGTCGAGATACGTGTGGTCTGCTACCTGTTAAATTTGTTGTCAACGTTTCCGCGATCTATGTAACCATTTGATTTGCGGTCAATTTAAAAGGTTTTTAAACGCTTAT…	UACUAAC	UACUAAC	11	35		NA	NA	NA	No	YES	No	No	No	NA	NA
I	3730701	3730903	203	1	SPAC15E1.08	SPAC15E1.08.1:exon:4-SPAC15E1.08.1:exon:5	int_783	113	53	60	0	0	59	2	2	A;A	GUUACUAACAA;GGUUACUAACA	11;12	97;16	dbr1_1;dbr1_2	47	32	7.3082	7.60744	48	16.5	5.77141	5.35797	GTAAGTACTTTGTTGTAAAAACTAGGTTGGGGATGGTTGCATGGATCGTTTAATGAGTATTCTTTCCAAAAACTATATACAATCTTTGTGACAATCGTTCTTTCTTTAGTTTGGTCAACTTCTGTATAATTACCTACGTTGTTTCAGACAATATATGACTGTTCAACGTCATCACAACTATCTAGGTTACTAACAATTTTTAG	UACUAAC	UACUAAC	11	97		NA	NA	NA	No	YES	No	No	No	NA	NA
II	3174651	3175046	396	-1	SPBC776.02c	SPBC776.02c.1:exon:2-SPBC776.02c.1:exon:1	int_4035	26	11	14	1	0	20	2	3	A;A	UUUACUAACUU;AUUUACUAACU	11;12	23;3	dbr1_1;dbr1_2;wt_1	30	28	8.17763	8.26796	7.75	3.625	5.78065	6.02208	GTGAGTGGGGAAAAGCAGACTTGATCATGATGAAGGGTTGAGTTTAGACAAATTTTTGAAAGGAAATTGAAATCAGTTGTTGTTTAATACAATAATTTACATGAAGAAACTGGAAACGACTCTATGTAAATGTTCATTCAACTGTTCATAAAATTTGAGGAAAACCCAGGAAAAAGGGAAAGTTTTTTCTTTGAAAACGTTTAGAAAGCATTTTCTTTGATTCTTGGTCTCATTTGTGATGACACTTGCTTTATATACATAATCACGCATATTTGTATTCAAATGCGATTGCATATTGGCATATATCGTGTTTCTGTGTGAATGATTTTTCTAACCAATACTTCCATCCTTAATTTTACCATTTAAACCATTTAGCTATTTACTAACTTCTTTTAG	UACUAAC	UACUAAC	11	23		NA	NA	NA	No	YES	No	No	No	NA	NA
I	3103566	3103707	142	-1	SPAC589.06c	SPAC589.06c.1:exon:2-SPAC589.06c.1:exon:1	int_1844	7	3	4	0	0	6	2	2	A;A	UUUUCUGACAA;AAUAUAAAGUA	17;36	6;1	dbr1_1;dbr1_2	143	80	7.6913	8.02535	48	81	5.44692	4.97598	GTAAGTTTTATTATATTTAAACTTTAGTGTTCTGAGAATATTTGTCAAATGCGAGGTATTCTTTTGCATGGGCTTTATTAGATTTCGCACTATAGAAGAAATATAAAGTATGTTCAGCTTTTCTGACAAAATCGAAATTTAG	UUCUGAC	UUCUGAC	17	6	UAUAAAG	36	1	NA	No	YES	No	No	No	NA	NA
I	4423191	4423306	116	1	SPAC16.01	SPAC16.01.1:exon:2-SPAC16.01.1:exon:3	int_887	54	31	23	0	0	32	2	2	A;A	UUUACUAACUU;AUUUACUAACU	15;16	50;4	dbr1_1;dbr1_2	0	0	4.82128	5.36391	0.166667	0.25	2.77215	2.82295	GTAAGTACAGATGTCATAAAAGTGAGCTTTGGCTTATCGCATATTGCACGATACGCAAATACTTATTGTCTTTTCTACCTTATTTATTTATTTATTTACTAACTTACTGGCGATAG	UACUAAC	UACUAAC	15	50		NA	NA	NA	No	YES	No	No	No	NA	NA
III	262885	263092	208	1	SPCC794.07	SPCC794.07.1:exon:1-SPCC794.07.1:exon:2	int_4424	41	17	24	0	0	25	2	2	A;A	AAAUCUAAUCA;AAAAUCUAAUC	134;135	38;3	dbr1_1;dbr1_2	0	0	5.38929	5.79975	0.2	0.142857	-16.6096	-16.6096	GTAAGTAAGATAGATCAGTATATTGATGCTTCTGGTTCATCGATTAATCGTAATGAATTTTAAACGAAAATCTAATCAGTGTGCAGAAAAGTTCAGGTTAAAAAGTCTGCTCTTTATCCTGTTATGGCTAAGCTAGCTCGCACATACGCTACCAAAAGTAAGTGATTGCTTTTTTGGCTGAGAAATGGCTTTCTAACAGTTACCATAG	UUCUAAC	AUCUAAU	134	38		NA	NA	NA	No	No	No	No	No	NA	NA
II	1404843	1404973	131	-1	SPBC17A3.03c	SPBC17A3.03c.1:exon:2-SPBC17A3.03c.1:exon:1	int_3664	18	11	7	0	0	15	2	2	A;A	UUAGCUAACCC;AUUAGCUAACC	13;14	14;4	dbr1_1;dbr1_2	57	38	4.12342	3.63388	9.66667	9.75	6.1087	6.12843	GTAAGCTTTCCACCATCTTAACTTGTTGCACACTTTGTTTAAAAATTAAAAAGATATTTTAATTATTCTTCATTCCTTGTTTCAAGTTTTTTTTTAATTACTTTACTTTGATTAGCTAACCCGCTTGCTAG	AGCUAAC	AGCUAAC	13	14		NA	NA	NA	No	YES	No	No	No	NA	NA
II	1524056	1524156	101	1	SPBC83.08	SPBC83.08.1:exon:1-SPBC83.08.1:exon:2	int_2688	70	34	36	0	0	37	3	2	A;A;A	UUAACUAAUCU;GUUAACUAAUC;UGAGUUAACUA	17;18;21	55;9;6	dbr1_1;dbr1_2	61	59	4.62416	4.81644	31	60	5.2469	5.56296	GTATGTTTTTAAAATAGAAATAGACCTCTAGCATATTTTGAAATTGGGGGGACTCAAATGCTTTAAAATTGAGTGAGTTAACTAATCTTTACTGTTTTTAG	AACUAAU	AACUAAU	17	55	AGUUAAC	21	6	NA	No	YES	No	No	No	NA	NA
I	3639265	3639385	121	-1	SPAC1142.07c	SPAC1142.07c.1:exon:2-SPAC1142.07c.1:exon:1	int_1976	54	36	18	0	0	34	3	2	A;A;A	UAAACUAACUU;AUAAACUAACU;CUAACUUACAU	12;13;8	43;7;4	dbr1_1;dbr1_2	104	103	5.91605	6.48315	26.25	26	5.18237	5.43225	GTACGTCTATAGTTAAACTTCCATCAGGAAATGTACCGTTTGCTTGATCACATTTGTAGTCTCGGTGAAGCAACGATGTGCATGTAAATTAAATGATTTTTATAAACTAACTTACATATAG	AACUAAC	AACUAAC	12	43	AACUUAC	8	4	NA	YES	YES	No	No	No	NA	NA
II	3030914	3031054	141	-1	SPBC15D4.11c	SPBC15D4.11c.1:exon:2-SPBC15D4.11c.1:exon:1	int_4007	4	4	0	0	0	4	1	1	A	AGUACUAACGU	10	4	dbr1_1	4	7	2.62825	2.77568	2.5	8	2.56813	2.85995	GTAAGCTATTTTTCCTCAATTGTTTGTTGAATTCAACGATGTGATTTCATGTCTATGCGTTGGCTAATATACAACGTTTAAGATTATGCTTTCAGCAGAGCCTTTAAATTTCTTTCGATATAATAGTACTAACGTAGCTAG	UACUAAC	UACUAAC	10	4		NA	NA	NA	No	YES	No	No	No	NA	NA
II	1162666	1162819	154	-1	SPBC409.12c	SPBC409.12c.1:exon:3-SPBC409.12c.1:exon:2	int_3618	7	4	3	0	0	5	2	2	A;A	UUUCCUAACUG;AUUUCCUAACU	11;12	4;3	dbr1_1;dbr1_2	7	4	4.53496	4.5298	1.33333	5	1.71598	2.35572	GTAACGAATATCAGCATTGAGGCAATAAGCAGTTCCACTACTGCATACACGACTCATTTAGTTGTTGAATCTAGTTAAGGTTTTTTATAAAATCAACTTTTGAGAAGCATCTGCCTCTATAGCTCCCTTTTTTCTATTTCCTAACTGAATTTAG	UCCUAAC	UCCUAAC	11	4		NA	NA	NA	No	YES	No	No	No	NA	NA
II	546465	546589	125	-1	SPBC354.02c	SPBC354.02c.1:exon:5-SPBC354.02c.1:exon:4	int_3478	10	6	4	0	0	7	2	2	A;A	UUUACUAACCA;AUUUACUAACC	11;12	9;1	dbr1_1;dbr1_2	120	76	6.15789	6.52806	20.1667	12.8333	7.42757	6.93739	GTATGTTTTTAAGAAATATGGATGAGTGAAGGTATTGTAACCATCACTGACAAGAGATTACTCTTTAACTTCCTTATTTTTCATTTTTTAAAAAATGTGTTTATGCATTTACTAACCATTATAAG	UACUAAC	UACUAAC	11	9		NA	NA	NA	No	YES	No	No	No	NA	NA
II	3318203	3318401	199	1	SPBC17D11.06	SPBC17D11.06.1:exon:2-SPBC17D11.06.1:exon:3	int_3120	50	33	16	0	1	39	2	3	A;A	UUUCCUAACGC;UUUUCCUAACG	13;14	31;19	dbr1_1;dbr1_2;wt_2	1	5	6.08759	6.25468	1	1.5	5.10063	5.05259	GTAAGTAAAAATGTGCTATATTTGAGTGCTGTCTGTCGAAAAATATCTCATTTAGACTTATAAATGCGTTCGCGTTATGGCATAAGTAGTAAATTGAACATAAAGTGGGTATCAATTTGCTGCTTCAGTTAAACAGAAAGCATTATATATATGAATACATTTAAACTTGCTTTTATTCTTTTCCTAACGCATTCATTAG	UCCUAAC	UCCUAAC	13	31		NA	NA	NA	No	YES	No	No	No	NA	NA
I	1712940	1713156	217	1	SPAC664.06	SPAC664.06.1:exon:1-SPAC664.06.1:exon:2	int_374	134	75	59	0	0	56	2	2	A;A	UUUACUAAUUU;UUUUACUAAUU	12;13	110;24	dbr1_1;dbr1_2	145	121	10.9675	10.9182	48.6667	11.0909	9.19926	9.097	GTATGTGAATTGCTTGTTCTACAGGTTTGAAATATCCATAATATACATATTTATATGAAAAAGATGAACCTTTCACTCTTGGATTGCTAGTTTCGACGATGCTGCTCCAAAATACCATCTTTCGGCTGATTCATATATTTTGTATTGGTTAAATTTAAACCTTTGACTTCATCAATTTTTATATATTGTTAAAAACATTTTACTAATTTTACTCCAG	UACUAAU	UACUAAU	12	110		NA	NA	NA	No	YES	No	No	No	NA	NA
III	2102847	2103131	285	1	SPCC576.14	SPCC576.14.1:exon:1-SPCC576.14.1:exon:2	int_4785	16	8	8	0	0	11	1	2	A	AUUACUAAUUG	9	16	dbr1_1;dbr1_2	56	33	7.60761	7.41184	4.75	4.85714	6.88059	6.76127	GTATGTTTACTTGAAAGTACATGTTCCTTTTATTTATCTTTTTTTTATTTACTTTGAGAAATTTGACTCAGCTGTTTATTACAGGCTTTTAGCCCTTACGACAGCATCTCTCAGTTATTAAAAAAGCTTTGGTTTTTGCGAATTGTCTCTTTAAAGAACATTCAGTTTGTCATCGAACCCTATGATCTGTAAAGATTTAATTGTAGTGAATACTAATGACTCTTTAATTTGAGAACCCGTGCTTTTAATAATCGTTTATTTTTTATTGTATTACTAATTGTTTAG	UACUAAU	UACUAAU	9	16		NA	NA	NA	No	YES	No	No	No	NA	NA
II	1444847	1445020	174	1	SPBP22H7.06	SPBP22H7.06.1:exon:3-SPBP22H7.06.1:exon:4	int_2663	10	7	3	0	0	9	2	2	A;A	UAUACUAACUC;AUAUACUAACU	17;18	9;1	dbr1_1;dbr1_2	11	13	7.24542	7.1462	1.33333	7	3.65928	3.64624	GTTCGTTTAGATTATTTCGTCTATTTGCCTAGTCGTGCGAATTTTGCAAGTGTCATAGAATAAATCGTACCCTCGTTTTAAAAACCGATGGTTGAATCTTATCGATGAAGCAAACACTGTGTTTTTATGTAGTGCCAAAGCACCTATTGATATACTAACTCGTTTGTTTTGTAG	UACUAAC	UACUAAC	17	9		NA	NA	NA	No	YES	No	No	No	NA	NA
I	2755104	2755191	88	1	SPAC6F6.12	SPAC6F6.12.1:exon:2-SPAC6F6.12.1:exon:3	int_589	118	43	75	0	0	55	2	2	A;A	GUCACUAACAC;CGUCACUAACA	13;14	104;14	dbr1_1;dbr1_2	15	10	7.23798	7.62993	0.64	0.458333	5.54541	5.63512	GTATGCGTGCAATTAAATAGAAACTCGTTAGTGCAGTGATTCCGATGTCTTTGACTTTTCAATGATTCGTCACTAACACTTTTTGTAG	CACUAAC	CACUAAC	13	104		NA	NA	NA	No	YES	No	No	No	NA	NA
II	1052123	1052338	216	1	SPBC337.12	SPBC337.12.1:exon:1-SPBC337.12.1:exon:2	int_2535	28	13	15	0	0	20	4	2	A;A;A;A	AUAACUAACCU;UUAACUAAUGA;UGGUUUAACUA;UAUAACUAACC	8;126;130;9	17;6;3;2	dbr1_1;dbr1_2	5	5	6.99564	6.94308	2	1.5	3.26425	3.69257	GTACGTTTTGATTAAATTGTATTAACGTCTTTTGATTGTCTGTTATACAGAATAAATTTGGTCGACTTTGAAGTTGGATTGGTTTAACTAATGAGCTTTTTGGTTTTTGAAACCAATGAATAATTAGGATTTTCAAGGAGACAGATTTTATGCAAAAAAATATCTTTATGTTTCTTTATTTATGAAACGCTCAGTAATAATATAACTAACCTTTAG	AACUAAC	AACUAAC	8	17	AACUAAU	126	6	NA	No	YES	No	No	No	NA	NA
I	1710550	1710692	143	-1	SPAC664.04c	SPAC664.04c.1:exon:2-SPAC664.04c.1:exon:1	int_1529	33	17	16	0	0	26	2	2	A;A	UAUACUAACUG;UUAUACUAACU	11;12	22;11	dbr1_1;dbr1_2	13	18	7.90036	8.15309	1.55556	3.8	9.09684	8.91874	GTTTGTTTATTATTGAATTTCAAGCAACTTTATTTAGTTTTGGACATAACGCATTTAAGCTTTTTTGTGCTTTGTCTACTGAAGCATTTGGTTGCCTGTCTATATTCACTGTGTTTTTGTATTTTTATACTAACTGTTTCTAG	UACUAAC	UACUAAC	11	22		NA	NA	NA	No	YES	No	No	No	NA	NA
I	3980196	3980558	363	-1	SPAPB18E9.02c	SPAPB18E9.02c.1:exon:2-SPAPB18E9.02c.1:exon:1	int_2063	10	5	5	0	0	8	2	2	A;A	UUUACUAACCA;UUUUACUAACC	14;15	6;4	dbr1_1;dbr1_2	29	45	9.2104	9.24129	2.30769	15.3333	3.03898	3.18133	GTAAGTGCAGTGGAATAGCGGGCGATGTTACGAAATTTCTCTGTGTTGTTGGCAGAAGGATACCATTGCTTGCTAGAATATTTATATTGTACATTTAATTTGTATCTTTCTTTTAACGATTCGGTTGGTATGACTTTGCAGATTACGCAAAAATAGCCATTGAATAAGGCTTCAATTGCCTTGATCTGTAAGTCATACGTATAATACTTAAATCTTCTATTTGCTGCCGACCTGTTTTAGTTCTTTTAAGCTGGATTGGCCAAGCTATGGCTGATACTCCTTGGGTCGCCTCTGTCCTTCAACTTTTGAAATCTTGCTCTTTTTCAATTTATTGCTAGGTCTTTTACTAACCAAGTTGCATAG	UACUAAC	UACUAAC	14	6		NA	NA	NA	No	YES	No	No	No	NA	NA
I	2689772	2690152	381	1	SPAC644.09	SPAC644.09.1:exon:1-SPAC644.09.1:exon:2	int_565	21	12	9	0	0	16	4	2	A;A;A;A	AUCACUAACAA;UGCCUUAAUGG;CAUCACUAACA;AUCCAUCACUA	23;11;24;27	18;1;1;1	dbr1_1;dbr1_2	14	6	8.46895	8.33325	1.5	1	3.18962	2.40743	GTAAGTTTGTATGAGTGATTTTGGTTGTTTTTTCGGGTACTTGGTAAAATTGAATTTCGGATGTCTGATCTCCAGGCGAATAAAGTCATACTGCTCAGCTAATAAGCTTCGTGAAAGATTTATTTAACTCGACGATATAATACTTTATTTTTAGGCTTATAATATTTAAGGAAATGATGCTTCGCCGAGAATAAAATGTTGCAAAGATATCTTCGATTAAAATGGGTTTATCTGAAATAGCGTTGTTTATGTCAGCTGAGGTGAAGGAAAAGATCTAAAAAAATGAATATTTTCACTTTTACATTTTTGGGATTCCCTAAAAATCTTCCAATTTCGCCTGCTGCTTTATCCATCACTAACAATTGCCTTAATGGCTTTTAG	CACUAAC	CACUAAC	23	18	CCUUAAU	11	1	NA	YES	YES	No	No	No	NA	NA
I	2830807	2830991	185	1	SPAC3F10.19	SPAC3F10.19.1:exon:2-SPAC3F10.19.1:exon:3	int_611	26	18	8	0	0	18	3	2	A;A;A	UUUACUAACUU;UUUUACUAACU;UGUUUAUACUU	10;11;90	23;2;1	dbr1_1;dbr1_2	6	3	4.65146	4.79413	1.75	4	4.96045	4.25226	GTACGTGAATCAAATTTAAAAAAAAAAAATGAGTGGATTTGTTTATTAATACCTTAATCAAAAATTTCTATAAAGCACTCTTTCTTCATGTTTATACTTTTAATGGAAAACTGTTTTTATAGAAACTACTTCCTTTCTACCTTTTTTCCTGTTTAGATGAAAGCAGTTTTTACTAACTTTAGCAG	UACUAAC	UACUAAC	10	23	UUUAUAC	90	1	NA	No	YES	No	No	No	NA	YES
I	829425	829507	83	-1	SPAC2G11.11c	SPAC2G11.11c.1:exon:2-SPAC2G11.11c.1:exon:1	int_1308	8	5	3	0	0	6	1	2	A	CUUUCUAAUCC	11	8	dbr1_1;dbr1_2	7	5	3.08791	2.29226	2.66667	6	2.85192	2.8807	GTAAGTTTTCTCTTTAATGACATACAAATACATGTTGCATGTATATGTAATTAATCCTGCCAAACCTTTCTAATCCAAATTAG	UUCUAAU	UUCUAAU	11	8		NA	NA	NA	No	YES	No	No	No	NA	NA
I	1838853	1838969	117	1	SPAC1399.05c	SPAC1399.05c.1:exon:1-SPAC1399.05c.1:exon:2	int_395	45	26	19	0	0	28	2	2	A;A	UUUACUAAACU;AUUUACUAAAC	15;16	34;11	dbr1_1;dbr1_2	3	5	6.28648	6.62982	1	6	4.71607	4.38536	GTATGAATATATTTGTTTTATTCTTAAGACTTTTTAAAAACCCATTCCTCTTACTGTAGTCTTGTTGTTGTAATACCATCTTTCAAACTAACAAATTTACTAAACTGCTTATTATAG	AACUAAC	UACUAAA	15	34		NA	NA	NA	No	No	No	No	No	YES	NA
I	3172858	3173051	194	-1	SPAC3G9.06	SPAC3G9.06.1:exon:2-SPAC3G9.06.1:exon:1	int_1859	46	24	22	0	0	31	2	2	A;A	UUUUCUAACUG;UUUUUCUAACU	10;11	41;5	dbr1_1;dbr1_2	78	54	8.2309	8.15087	39.5	27.5	7.41501	7.30473	GTAAAGTCATTGGAATCGTAGTTGTGAACGACGAAGCATTTAAATATAATTAAGTCTAAACGCCCGGTAAATATTGTTAGTTTTTTTTTTCTAGCATTATGTTGCATTTTCGATTTTTCGCGTTTTGATGCAACACCTTTTCATATCGCTACGTCTGCCTTTTAGTTTTTTTGTACTTTTTCTAACTGATTTAG	AACUGAU	UUCUAAC	10	41		NA	NA	NA	No	No	No	No	No	NA	NA
I	1885877	1886077	201	-1	SPAPB1A10.12c	SPAPB1A10.12c.1:exon:2-SPAPB1A10.12c.1:exon:1	int_1574	14	11	3	0	0	12	2	2	A;A	GCUUCUAACAU;UGCUUCUAACA	16;17	12;2	dbr1_1;dbr1_2	89	38	7.18386	7.04139	18	6.5	5.20363	4.75703	GTAATGCTTTTGCCCTTTTGGACGTAGCGTAAGAAAACTGGGTTTAAGAAGACTTGTAAATTTGTTTAAAGTTAGCTTTACATCTGTCCTTAGTTTCTAGTAGTTCATGATGCTGCTTTGGCTATCAATCCTTTTCCCCCTTTTTTTTACATTTCTATAGAAATTAATTAGTTCGCTTGCTTCTAACATTATTATTTTTAG	UUCUAAC	UUCUAAC	16	12		NA	NA	NA	No	YES	No	No	No	NA	NA
III	1441671	1441782	112	-1	SPCC61.01c	SPCC61.01c.1:exon:2-SPCC61.01c.1:exon:1	int_5146	21	5	16	0	0	12	2	2	A;A	CAAGCUAACAC;UCAAGCUAACA	21;22	20;1	dbr1_1;dbr1_2	2	2	3.96045	4.38351	1.5	0.6	3.5585	3.49417	GTATGTTAGTATTGTAGTCATGATAATCCATAAATCACGTAGTGTTTGCATACATCTGTTGAATGTTTGTGTTTGTGGTATGATCAAGCTAACACAATGTCTTCTCTTTTAG	AGCUAAC	AGCUAAC	21	20		NA	NA	NA	No	YES	No	No	No	NA	NA
I	4842892	4843135	244	-1	SPAC4F10.07c	SPAC4F10.07c.1:exon:3-SPAC4F10.07c.1:exon:2	int_2237	28	19	9	0	0	22	3	2	A;A;A	UUAAUUAACAA;CUUAAUUAACA;GCACUUAAUUA	11;12;15	21;6;1	dbr1_1;dbr1_2	6	6	7.99164	7.81471	2.33333	3.5	2.26696	2.33137	GTATGTATTTTTGTTTTTCTACAATGACGAGTATCGGTGTTATGCGCTTTATTCATACAGTGGTTTTCAAAAAACTCAAGATTATTTATCAATTACTTATCAGTTTACGTTCATCTCGTGCGTCTGCATAGAGTTTCATTTTTAAGCTACAGGTGAATAAGTTGATCACTGTACTATTGATGTATAAATGTGGAATTACAAATAATTAAAAAATTCATATTTGCACTTAATTAACAAAATGTAG	AAUUAAC	AAUUAAC	11	21	ACUUAAU	15	1	NA	No	YES	No	No	No	NA	NA
I	3377367	3377518	152	1	SPAC8E11.07c	SPAC8E11.07c.1:exon:2-SPAC8E11.07c.1:exon:3	int_694	22	12	10	0	0	18	1	2	A	AGUACUGACAU	17	22	dbr1_1;dbr1_2	92	89	6.05829	6.31419	13.2857	45	6.5764	6.65062	GTATGTTGCATTAGTTGAAACCATATAAACGTTGGACGTGTTGTGCTAGAAGATGTTTCTACCAAGCTGAAGATACTTTTCGGTGGTTTCCGCTTTAGCGTATCTTTTTTAAAATAAAAAATAATCAAAGTACTGACATTCTGGACCTCTAG	UACUGAC	UACUGAC	17	22		NA	NA	NA	No	YES	No	No	No	NA	NA
I	737038	737164	127	1	SPAC22G7.05	SPAC22G7.05.1:exon:1-SPAC22G7.05.1:exon:2	int_162	18	11	7	0	0	15	2	2	A;A	UAUACUAACUA;GUAUACUAACU	11;12	13;5	dbr1_1;dbr1_2	120	99	4.26944	4.5115	121	100	4.7582	4.72984	GTAAGTAAATTTTTTTGTAATGGCTTTCTTGCAATCAGTTGAAAAGCAAATCTTTGGCGATTATTCTATTGCTTATGAAATTTCAATTGAAAAGAAAACGTGAATCAGGTATACTAACTAAAATTAG	UACUAAC	UACUAAC	11	13		NA	NA	NA	No	YES	No	No	No	NA	NA
II	3996806	3997066	261	1	SPBC3B9.21	SPBC3B9.21.1:exon:1-SPBC3B9.21.1:exon:2	int_3279	10	5	5	0	0	9	2	2	A;A	GUUGCUAACGU;CGUUGCUAACG	9;10	9;1	dbr1_1;dbr1_2	22	7	8.21563	8.33723	7.66667	1.6	3.11453	3.04021	GTAAGTTAACAAAACGGTGACAACGAAATCAATATCAAGTCGTATTTAGGAAAGCATATGAACAAAAAAATAAACACATTTTATATCACTGGATTTGACTATGTGAATTTTTCCATTTGTCGATATATAGAAAGTAAACTGCTTTGATATATCGTTTAACAATGGAATTTTAAGATACGAACTTTACTTTATTGATCAAAAATGAATATAGTCTTTTATTCTACGTTTATGTTTTTATTTAACTCGTTGCTAACGTTCAAG	UGCUAAC	UGCUAAC	9	9		NA	NA	NA	No	YES	No	No	No	NA	NA
I	5300949	5301115	167	1	SPAC11E3.10	SPAC11E3.10.1:exon:2-SPAC11E3.10.1:exon:3	int_1095	58	36	22	0	0	33	4	2	A;A;A;A	GUUACUAAACA;UGUUACUAAAC;UUACUAAACAC;UAUAUUGAUAA	16;17;15;35	44;12;1;1	dbr1_1;dbr1_2	6	4	7.16171	7.32799	0.225806	0.113636	3.37549	3.08234	GTAAGTAAACTCCGCACATGTAACTAGTTTCGTTTTTAAATCATTCGTATTCGTAACGCTTTGCTCCTTATTATTACTTTATCGAAATTCAGCCTTTTAAAGGATTTATTTTTTTTGAAAACAATTATATTGATAAATGATTATGTTACTAAACACATTGTATTTAG	UAUUGAU	UACUAAA	16	44	UAUUGAU	35	1	NA	No	No	No	No	No	YES	NA
I	2606318	2606540	223	1	SPAC823.14	SPAC823.14.1:exon:2-SPAC823.14.1:exon:3	int_553	14	8	6	0	0	13	3	2	A;A;A	UUUACUAACUA;GUUUACUAACU;UGUUCUUACAA	12;13;154	8;5;1	dbr1_1;dbr1_2	125	102	6.62443	6.59091	5.72727	4.47826	7.05587	7.05432	GTAAGGTTGGGAATAGGAAGATTGTTACAGATATAAAAAGATGTATAAAGGTAGTTAGAAAATGTTCTTACAATTAAGCTTAACTGAATATTTATTGAAGATTTACGAAAATCTGTAAGAGAAATCTATGATTTTATAACATTGGGTCAAAAATTTCCCTGCCCACCTTGAATGCTTTATTACTGCAACACTCGACGGCGACGGTTTACTAACTATGTTTTAG	UACUAAC	UACUAAC	12	8	UUCUUAC	154	1	NA	No	YES	No	No	No	NA	NA
II	4386685	4386818	134	-1	SPBC1289.03c	SPBC1289.03c.1:exon:3-SPBC1289.03c.1:exon:2	int_4347	88	54	34	0	0	31	2	2	A;A	AUUACUAAUCG;CAUUACUAAUC	11;12	85;3	dbr1_1;dbr1_2	317	261	6.99939	7.17486	39.75	87.3333	8.90524	8.95672	GTAAGTGATATTTAAGCAAAAAAAAGCTTTAAATGTTTTTTTTGATACTCATAGACCGCTAGATTTAATGGTTATAAGTATATTGACATTAGCTTTTTTTGACTACTTTAATGAACATTACTAATCGAATGCAG	UACUAAU	UACUAAU	11	85		NA	NA	NA	No	YES	No	No	No	NA	NA
II	4184186	4184319	134	-1	SPBC14F5.13c	SPBC14F5.13c.1:exon:2-SPBC14F5.13c.1:exon:1	int_4297	52	35	16	0	1	29	1	3	A	GUGACUGACUU	13	52	dbr1_1;dbr1_2;wt_2	155	92	6.76883	6.54372	31.2	23.25	6.55481	6.3159	GTAAGTGATTGGAGTAAGCTCTCTCATAAATCCGTTGCTCTTTTGAAGGAAAATGATTTTTTTTATATTTAGAGCACTGGGACGGAATCTTCCTTTTTTTTACAATATTTCTCGGTGACTGACTTTTTTTAAAG	GACUGAC	GACUGAC	13	52		NA	NA	NA	No	YES	No	No	No	NA	NA
III	465130	465258	129	1	SPCC4G3.04c	SPCC4G3.04c.1:exon:1-SPCC4G3.04c.1:exon:2	int_4464	88	46	41	0	1	43	2	3	A;A	GAUUCUAACCU;UGAUUCUAACC	13;14	83;5	dbr1_1;dbr1_2;wt_2	153	104	7.25604	7.52335	2.48387	1.69355	7.18466	7.01704	GTATGTATGGAAGAACTGGTTTGCTAGGACATGTGATTTGATTGTAAATCATAACATTTTGCATTTTGCATTTACTGAAGAAATTTGACTTCAATCTTAAATAGGTACTGATTCTAACCTTTTAATTAG	UUCUAAC	UUCUAAC	13	83		NA	NA	NA	No	YES	No	No	No	NA	NA
II	2701016	2701073	58	-1	SPBC4F6.08c	SPBC4F6.08c.1:exon:3-SPBC4F6.08c.1:exon:2	int_3930	1	1	0	0	0	1	1	1	A	GAAGCUAAUGA	16	1	dbr1_1	136	107	3.5175	2.61667	19.5714	36	5.03471	5.00335	GTAAGTTATTATGGATTTTCTAAAGCCTCATTTAAGAAGCTAATGAATGAACCCATAG	AGCUAAU	AGCUAAU	16	1		NA	NA	NA	No	YES	No	No	No	NA	NA
I	3042910	3043095	186	-1	SPAC24C9.16c	SPAC24C9.16c.1:exon:3-SPAC24C9.16c.1:exon:2	int_1827	74	43	31	0	0	43	2	2	A;A	UUAUCUAACCU;UUUAUCUAACC	13;14	69;5	dbr1_1;dbr1_2	8	8	6.20701	6.20496	1.28571	1.5	3.59121	4.23666	GTATGTTGGTGAACTAGATTTGAGTCCTATGCATCTGTAATTTGGTAAAAGCAGCTTTACCAGGAATGGCATCTCACTTGCAAAAAAAATTACTTCTACAGTAAAAAAAATGCATAGAAAGCCAACTTATTAGAGGAACATTTCCTTTCCTTTTCTTTATGAAGATTTATCTAACCTAGAATTCAG	AUCUAAC	AUCUAAC	13	69		NA	NA	NA	No	YES	No	No	No	NA	NA
II	578182	578724	543	1	SPBC354.12	SPBC354.12.1:five_prime_UTR:1-SPBC354.12.1:exon:1	int_2451	137	65	72	0	0	62	3	2	A;A;A	CUUACUAACUC;UCUUACUAACU;UCUUCUUACUA	11;12;15	122;14;1	dbr1_1;dbr1_2	118	116	7.86669	7.8322	7.4375	5.85	6.13888	6.1648	GTATGTGATGCGCTGTGGCATTGGCAAAGCATTGGCTTGGTGAGACATGTGACATGTGTCAAACACCTGCCAAGAGGGAAAAATAGATTGAGGAAAAGGAAGGGATATTTTCTTTTGATATTCTCTTTTAGTTGAAAAAGATGGATTTTGAGCGATGAATTGAAATGAAAATGGTCAGTGAGATTGCCAAGAGAAGAGGCTCTCTGATTTTACTTGACATGACGAAAACATGTCATATCCAGTATGGTGAAATTGTACAACGAAGTCGTGATAAGATTCGTTAGTTTCCGTTTCTTTCGGTAAAGAAGGCTTTATTTTTCGCTTGACGGCAGTTTGGTCAGAAATTAAAATAGACTTGCCGAAAGCGACAAAGCTGCTGTTTTTAGTATACTTTCTTTT…	UACUAAC	UACUAAC	11	122	UUCUUAC	15	1	NA	No	YES	No	No	No	NA	NA
I	2621520	2621661	142	-1	SPAC7D4.10	SPAC7D4.10.1:exon:5-SPAC7D4.10.1:exon:4	int_1740	17	10	7	0	0	15	2	2	A;A	AAUUCUAACCA;CAAUUCUAACC	9;10	16;1	dbr1_1;dbr1_2	53	32	5.652	5.84847	13.5	33	6.53776	6.35772	GTAAGTCATTTATACATTGTTGAAAGCTTTGATAGTCTTGATAGTGGATGTTTGTCTTTTGAAATTACCTTTTAATTATTTCATCCCTTTATGTTGACAAATCGAATTTTTTTGCGGTTTTAAAGCAATTCTAACCACTTAG	UUCUAAC	UUCUAAC	9	16		NA	NA	NA	No	YES	No	No	No	NA	NA
I	4426111	4426198	88	-1	SPAC16.02c	SPAC16.02c.1:exon:8-SPAC16.02c.1:exon:7	int_2148	9	6	3	0	0	6	1	2	A	AGUGUUAACAC	13	9	dbr1_1;dbr1_2	0	0	4.04534	4.33715	1	1	0.166044	-16.6096	GTAAGACAATTTTATACATTTAATGACCTTTGCGTCAATGCATGATTTTTTTCATATATCTATATTTCAGTGTTAACACTTTTCATAG	UGUUAAC	UGUUAAC	13	9		NA	NA	NA	No	YES	No	No	No	NA	NA
III	1832460	1832592	133	1	SPCC285.17	SPCC285.17.1:exon:2-SPCC285.17.1:exon:3	int_4739	138	84	54	0	0	54	2	2	A;A	AUUGCUAACUA;GAUUGCUAACU	10;11	118;20	dbr1_1;dbr1_2	16	14	6.76729	7.22673	8.5	5	7.28419	7.45705	GTAAGGCGGTGTTGTAGTGTGGAAGCCGTGCCTACTCGTTCCATTCAAAATCTTGTTGTTTTGAAAAAAGAGGCAGGCTTACATACTAAATGTTTATTTGCACGCTTTCTCTGCTGATTGCTAACTAACGTAG	AACUAAC	UGCUAAC	10	118		NA	NA	NA	No	No	No	No	No	NA	NA
I	927382	927488	107	-1	SPAC1687.13c	SPAC1687.13c.1:exon:2-SPAC1687.13c.1:exon:1	int_1320	8	4	4	0	0	7	2	2	A;A	AAUGCUAACAA;UAAUGCUAACA	10;11	7;1	dbr1_1;dbr1_2	3	0	5.14181	5.09576	2	1	3.93491	4.1648	GTAAGTTAAGATTTCATTGGTTTTTAGCTATATTATACCAGTCTCTGAATTTTTTTCCCTACGTTAATTTATTAAAATTATAAATCCTGTAATGCTAACAATAACAG	UGCUAAC	UGCUAAC	10	7		NA	NA	NA	No	YES	No	No	No	NA	NA
I	305877	306089	213	1	SPAC18B11.07c	SPAC18B11.07c.1:exon:2-SPAC18B11.07c.1:exon:3	int_23	79	52	27	0	0	39	2	2	A;A	UGGACUAACCA;UUGGACUAACC	13;14	78;1	dbr1_1;dbr1_2	45	30	7.53711	7.23637	23	15.5	5.13448	4.96686	GTAAGTGTTTACCTATGTCAATTCATTTTTCTCTTATTGTTATGCAACGTAATGGTGAATATATGTGCTATATATTGAATGCCTTTTTTGCCATATATTTAGGAAGGAGATCGTTTCAAAATTCTTACAAGAAGCGATCTTTTTATGCTTGTTGGTTTCTGGATTGATTGCTTTTGTTTTTTATTATTGATGTTGGACTAACCATTTGAGCAG	GACUAAC	GACUAAC	13	78		NA	NA	NA	No	YES	No	No	No	NA	NA
I	988569	988747	179	1	SPAC821.05	SPAC821.05.1:exon:2-SPAC821.05.1:exon:3	int_217	2	1	1	0	0	2	1	2	A	UUAACUAACUU	12	2	dbr1_1;dbr1_2	110	68	7.11084	7.29201	111	69	6.84347	6.53316	GTAAGTGTAGTCATTGGAGAATAAGTTTTCCCTATTTTTCGAAATGATAAAACTTGCAATTTTTCTGCATCAAAGATGCAGCTATGCATTTGTCAGCTCAGTAATGCTCTACTTAGTGAAATTTCTTATCAACCACAGTTTCTCTCTTGAAATAATATTTTTAACTAACTTTCGTTCAG	AACUAAC	AACUAAC	12	2		NA	NA	NA	No	YES	No	No	No	NA	NA
II	4384705	4384815	111	-1	SPBC1289.02c	SPBC1289.02c.1:exon:3-SPBC1289.02c.1:exon:2	int_4345	28	14	14	0	0	23	2	2	A;A	AGAGCUAACAG;UAGAGCUAACA	11;12	25;3	dbr1_1;dbr1_2	7	5	4.46371	4.62777	0.25	0.146341	5.52233	5.12047	GTATGTTATGTAATGAATACTCATAAAAAATTTCTCTTTTATTTATTGTTGCATACCAACTTTTTTCTTTCTCGGTTTTATCTTTTAATTTATAGAGCTAACAGGTTTTAG	AGCUAAC	AGCUAAC	11	25		NA	NA	NA	No	YES	No	No	No	NA	NA
II	343323	343504	182	-1	SPBC1271.12	SPBC1271.12.1:exon:5-SPBC1271.12.1:exon:4	int_3415	84	53	31	0	0	43	3	2	A;A;A	UAUACUAACAU;UUAUACUAACA;UUUUUAUACUA	19;20;23	79;4;1	dbr1_1;dbr1_2	158	139	7.35553	7.29136	11.3571	35	7.97883	8.0858	GTATGTGCATGTCATGAATAGAATTGAATGAAACGTAGATTGATTAATATAAATACTGTTGCTTTTGCCAAGCAAGATAATGAAGTTTTTCCTTTTCAGCACTGCTGCTTTGGTTTTACTTTCCTTTTTCTTTTCTTTCCTTGTGGTATCATTTTTTATACTAACATCTCTGTTTCTTATAG	UACUAAC	UACUAAC	19	79	UUUAUAC	23	1	NA	No	YES	No	No	No	NA	YES
I	2672784	2672977	194	-1	SPAC4F8.03	SPAC4F8.03.1:exon:2-SPAC4F8.03.1:exon:1	int_1746	31	15	16	0	0	22	2	2	A;A	AUAGCUAACCA;CAUAGCUAACC	11;12	25;6	dbr1_1;dbr1_2	75	59	8.21228	8.34932	19	30	5.31302	4.95458	GTATGCATGATTTCATTAAATTAAGCTACTGTAATTAGTGAGAGTCAGCCTTTGCTACAGATAAATATTCTTTAAGATCAGCAGAAAATTATAACAAGCTATCTTTTTGAATTCACGTGTCTTGTCGACTGGTGTCAACAACTCAATAACTCGTACAATTTTTTTTGATCAAAACCATAGCTAACCAAGTTTAG	AGCUAAC	AGCUAAC	11	25		NA	NA	NA	No	YES	No	No	No	NA	NA
I	1285630	1285700	71	1	SPAPB17E12.13	SPAPB17E12.13.1:exon:1-SPAPB17E12.13.1:exon:2	int_297	17	13	4	0	0	11	2	2	A;A	UAAACUAAUAA;UUAAACUAAUA	13;14	15;2	dbr1_1;dbr1_2	0	0	6.10838	6.28574	0.333333	0.142857	-16.6096	-16.6096	GTAAGTAAATGTCGTAACTGGTTGTTTTCCGGTTTTCGTGAGTGAGAATTTTAAACTAATAAATTTATTAG	AACUAAU	AACUAAU	13	15		NA	NA	NA	No	YES	No	No	No	NA	NA
III	541389	541568	180	1	SPCC962.01	SPCC962.01.1:exon:1-SPCC962.01.1:exon:2	int_4477	19	11	8	0	0	16	1	2	A	GUAAUUAACGC	13	19	dbr1_1;dbr1_2	4	5	8.09187	8.27084	5	6	5.74786	5.33538	GTAAGCGACTATTACTTATGTGTGTGTATGTTTGTATGAGATATGCCCGGATATTGACGTTTATTTTGATTTTCTGTTACAATTGACATCTCTATTGTTCGAGCATGGAACATCACATTCTATCTGTAACTCCACTTATTTTACGTTTAATCTGTCAATTGTAATTAACGCTAGAAATAG	AAUUAAC	AAUUAAC	13	19		NA	NA	NA	No	YES	No	No	No	NA	NA
I	3090048	3090162	115	-1	SPAC16A10.06c	SPAC16A10.06c.1:exon:3-SPAC16A10.06c.1:exon:2	int_1836	13	7	6	0	0	10	2	2	A;A	UGUUCUAACAA;UUGUUCUAACA	10;11	9;4	dbr1_1;dbr1_2	17	11	2.77792	3.06974	18	3	2.44475	2.196	GTACGTACCACGGAAATGACTTTCCTACTTTTTCTATTATATGTAGATGAAGTAAAAACATCAATTTAGACGTATTTTTTTACTGTTTCATATTCAATTGTTCTAACAAAATTAG	UUCUAAC	UUCUAAC	10	9		NA	NA	NA	No	YES	No	No	No	NA	NA
III	1923581	1923681	101	1	SPCC74.01	SPCC74.01.1:exon:2-SPCC74.01.1:exon:3	int_4745	16	11	5	0	0	11	2	2	A;A	CAAGCUAACAU;GCAAGCUAACA	13;14	15;1	dbr1_1;dbr1_2	12	7	5.69455	6.23791	13	4	5.70063	5.6673	GTATGGATTTCTCAGTATCATAATTTTCAATCAATTAATCTTATTGTCGGATACCAAATACTTTTTTGTATTACAGTTCAGCAAGCTAACATATTTTAAAG	AGCUAAC	AGCUAAC	13	15		NA	NA	NA	No	YES	No	No	No	NA	NA
III	934285	934763	479	-1	SPCC24B10.19c	SPCC24B10.19c.1:exon:2-SPCC24B10.19c.1:exon:1	int_5077	6	3	1	0	2	6	2	3	A;A	AUUUCUAACCG;AAUUUCUAACC	13;14	5;1	dbr1_1;dbr1_2;wt_2	21	9	7.50089	7.30258	7.33333	2	4.10431	3.97514	GTAAGAATGAATATTAGATATAATCAAGTTTATTTTTATCGCTTTTTCTAAAATTGTGAATTTTCAATTGATCGTCGTATGCTTGATAGCAATTTTGATGATCTTTTATCAAACATTTTGCACGCCTATAACTCTAAGGTTATATCAATTCAATTTTCTCAAAGAAACATATAAAATTTTACTCTATTCATGACTTGGCATGAGTGGTTGGATGAGACTGTGGCGTTGGTCGTTAATTATATTTTTTGTTGTTTCTGTTCGAAATTGAATGGTTGATTTCAACATTTAGCCCTTGGGTTTTTATTTCCCTAGGAAAAATGTTTGGGAGATTTAACCGTACAGTTTTCTGTAAAGCAAATGATTGTATAAAAAAATTATGATGACTGAAAATTCAAATCT…	UUCUAAC	UUCUAAC	13	5		NA	NA	NA	No	YES	No	No	No	NA	NA
I	4951566	4951736	171	1	SPAC1B3.13	SPAC1B3.13.1:exon:1-SPAC1B3.13.1:exon:2	int_1024	88	56	31	0	1	37	3	3	A;A;A	UUUACUAAUUU;UUUUACUAAUU;UAUUUUUACUA	8;9;12	82;4;2	dbr1_1;dbr1_2;wt_2	92	61	7.98692	8.15934	23.25	12.4	5.34364	5.07602	GTATGTTTTTTTTTATTAAAGGTTGGGTAGCCTTGAACAGACTGCTTTTGCTCAATTTTCTTAATTGAAATATATAACACGAAATGATCTGTAAGAATTTCATTCCTGTCTGTACTTGCCGCTGCTTTTCTAGTATTTTTCAGTTTTTAAGTTATTTTTACTAATTTTTAG	UACUAAU	UACUAAU	8	82	UUUUUAC	12	2	NA	No	YES	No	No	No	NA	NA
III	1897216	1897323	108	-1	SPCC737.06c	SPCC737.06c.1:exon:2-SPCC737.06c.1:exon:1	int_5242	53	27	26	0	0	29	3	2	A;A;A	UAUUCUAACAU;GUAUUCUAACA;UGUAGGCAUAA	12;13;26	44;7;2	dbr1_1;dbr1_2	4	2	7.66772	7.95407	2.5	3	6.31355	6.327	GTAAGCAAATGATGAATTGGACATTCAAACGAGTATCGTACTGCTTGGGTTTGGGCAGAAATATACTTGAATATTTGTAGGCATAAATGTATTCTAACATATTTCTAG	UUCUAAC	UUCUAAC	12	44	UAGGCAU	26	2	NA	No	YES	No	No	No	NA	NA
II	4385388	4385449	62	-1	SPBC1289.02c	SPBC1289.02c.1:exon:2-SPBC1289.02c.1:exon:1	int_4346	4	4	0	0	0	3	2	1	A;A	ACCCCUAACUA;GACCCCUAACU	10;11	3;1	dbr1_1	2	5	3.32818	3.41354	3	6	4.84497	4.88247	GTACGATGAACAATTTTGCTTTACCATTCCATTGAGACAAACATGACCCCTAACTAAACAAG	CCCUAAC	CCCUAAC	10	3		NA	NA	NA	No	YES	No	No	No	NA	NA
I	3843935	3844014	80	1	SPAC4H3.09	SPAC4H3.09.1:exon:2-SPAC4H3.09.1:exon:3	int_809	62	26	36	0	0	30	2	2	A;A	CGUACUAACUU;ACGUACUAACU	11;12	48;14	dbr1_1;dbr1_2	141	89	4.78148	5.61216	28.4	12.8571	6.22253	5.9459	GTATGAACTTTTTTTTCTCCTGAAACGTAGCGTCTAGCCTATATCTTTTCCTACTGCTTCTACGTACTAACTTTATACAG	UACUAAC	UACUAAC	11	48		NA	NA	NA	No	YES	No	No	No	NA	NA
I	1368442	1368645	204	1	SPAC57A10.03	SPAC57A10.03.1:exon:3-SPAC57A10.03.1:exon:4	int_314	17	7	10	0	0	12	2	2	A;A	GGUACUAAUUA;UGGUACUAAUU	10;11	16;1	dbr1_1;dbr1_2	5	2	4.33242	4.3168	6	3	2.42795	0.912419	GTAAGTTTTTTTCGCACTGTTTGCATCGTGCAAATAAGCATGTTGAAATATGAGTCTACAATTTAATATTTCAAGTGTGTTATTTTATTGATTTAACTGTTCACATTTACATGATGGACTCAGTCAGTCATATAAATATGTGTCCTATAATTCATTCAATATCGTATTTGATTTAATTCGTGAAATTGGTACTAATTAAATTAG	UACUAAU	UACUAAU	10	16		NA	NA	NA	No	YES	No	No	No	NA	NA
I	386615	386785	171	1	SPAC1751.03	SPAC1751.03.1:exon:2-SPAC1751.03.1:exon:3	int_44	22	12	9	1	0	15	2	3	A;A	AUUACUAACAC;UAUUACUAACA	11;12	21;1	dbr1_1;dbr1_2;wt_1	256	170	7.84028	7.8193	64.25	57	8.07945	7.63007	GTAATGCAAAATAGTTTTAGGCTAGGAAATTAAAGAATTATTTTAATAAGTGCTAAAGGGCATTTGTTATATTGTTAGTTCTGAAAGTATACTATGAGCTGATGTGTTTGGTTTGCAGCTTTCCAAGTTTTCGCTTATTTTCTCTTCCATGCTATTACTAACACGAAACAG	UACUAAC	UACUAAC	11	21		NA	NA	NA	No	YES	No	No	No	NA	NA
I	5365965	5366339	375	-1	SPAC4D7.08c	SPAC4D7.08c.1:five_prime_UTR:2-SPAC4D7.08c.1:exon:1	int_2344	7	3	4	0	0	7	2	2	A;A	AGCUCUAACAA;UCAAUUCACAA	11;26	5;2	dbr1_1;dbr1_2	36	30	7.05115	7.01288	2.05556	1.72222	4.43207	3.93033	GTAAGTTAATATAGATATTGATTTTCCAACGCCGCAGTACTTGCCTATGATGATTACCGTTTATTTAGATGCTAGACTTCTGAATTTCATCTTATGTAGCTACAAGGTTTTCTGAGGTCTGCTTAATTGATTAAAATTTTTTATTTTCTGTGATGGTAACATACAACTCATTTTACGGTCGGTACAAAAAAATTGAAATTATATTCCAAGTATTCTCAAACTTTGATTGCTGTCCGAATAGAACAGTCCGACTCATATTATTTTAATCAAGTTATAGCAATTTGACTGGGTGCTGTTTTTTCTTTTGTACATTTAAACCTATCATTTTATTATCTTTTGTATTCAATTCACAACCGAAGCTCTAACAAGTTTTAG	CUCUAAC	CUCUAAC	11	5	AAUUCAC	26	2	NA	No	YES	No	No	No	NA	NA
II	428548	428633	86	-1	SPBC582.05c	SPBC582.05c.1:exon:3-SPBC582.05c.1:exon:2	int_3440	20	10	10	0	0	11	2	2	A;A	CACGCUAACUG;ACACGCUAACU	11;12	19;1	dbr1_1;dbr1_2	0	0	3.40865	3.70047	0.25	0.5	-1.41889	1.19482	GTATGTTCTTGAGTCTATTCATGCTATTACCTTATAACTTACTGAATTATTGGTTTTACAGGGGAATACACGCTAACTGTCGCTAG	CGCUAAC	CGCUAAC	11	19		NA	NA	NA	No	YES	No	No	No	NA	NA
I	1512199	1512345	147	-1	SPAC5D6.01	SPAC5D6.01.1:five_prime_UTR:2-SPAC5D6.01.1:exon:1	int_1473	20	10	10	0	0	14	1	2	A	AAAACUAACGC	16	20	dbr1_1;dbr1_2	362	298	9.09468	9.16807	9.30769	14.2381	8.08499	8.1116	GTATGAAATATTAAATATTACAAGATGTGAGCGGAAGTCTATTGGTACATTTATTCTTCAGTGAATACTTGAACCCAATGGGTGGAACCTTTTTTTCTTGAAATCTTTAAACAAGACACTCAAGAAAACTAACGCGCTTCTCGTCAG	AACUAAC	AACUAAC	16	20		NA	NA	NA	No	YES	No	No	No	NA	NA
II	196245	196347	103	-1	SPBC1198.13c	SPBC1198.13c.1:exon:3-SPBC1198.13c.1:exon:2	int_3396	43	18	25	0	0	19	1	2	A	UAAACUAAUGA	15	43	dbr1_1;dbr1_2	24	22	3.38943	4.11008	4.16667	11.5	5.41556	5.35885	GTATGTCACTATACTTTGATAATGGATATTCTTTGCGTAATTGAAATTATCCATTTTTTATTTAATTTGATTTGTCAGAATTAAACTAATGAATTCATATTAG	AACUAAU	AACUAAU	15	43		NA	NA	NA	No	YES	No	No	No	NA	NA
I	4070173	4070266	94	-1	SPAC19G12.13c	SPAC19G12.13c.1:exon:3-SPAC19G12.13c.1:exon:2	int_2090	5	4	1	0	0	5	2	2	A;A	UUUGCUAACAG;GUUUGCUAACA	25;26	4;1	dbr1_1;dbr1_2	13	9	2.90836	2.69767	4.66667	10	3.19189	3.05486	GTAAGGACCAAATCAACGAATAGAAGACAATCTTTGTTTTTCTATTCATCGTTTAATATAAGTTTGCTAACAGATGATGTTTGATGTATTCTAG	UGCUAAC	UGCUAAC	25	4		NA	NA	NA	No	YES	No	No	No	NA	NA
I	2179118	2179379	262	-1	SPAC13F5.04c	SPAC13F5.04c.1:exon:2-SPAC13F5.04c.1:exon:1	int_1633	68	40	28	0	0	28	3	2	A;A;A	UUCACUAACUU;AUUCACUAACU;UUGAUUCACUA	17;18;21	62;5;1	dbr1_1;dbr1_2	4	2	4.57088	4.59966	1.66667	3	2.16047	0.381907	GTAAGTGTTTAGTAGCTAAGTGATGAATTTGTAATATGGAAGGGTGTATGAAAAAAAAAATTGGAGAAAGAAAAATATAAAATAATAAAAAAATAACTTAAACCTTTTTTCTCTCTTGTTTACGTTGATGAAGTTTTCATAGTCTACATTTCGCTAGAGGGAATACTACTTTCCATAATACACCCTATTATAAGCACAAAGGAATTTGTTTCATCATTCGAGATATTCATTTGCTTGATTCACTAACTTGTACTATTACTAG	CACUAAC	CACUAAC	17	62	GAUUCAC	21	1	NA	No	YES	No	No	No	NA	NA
III	354757	354855	99	1	SPCC594.01	SPCC594.01.1:exon:1-SPCC594.01.1:exon:2	int_4445	34	14	20	0	0	25	3	2	A;A;A	AAUGCUAAUUC;UAAUGCUAAUU;GGUGCUUAAUG	15;16;22	31;2;1	dbr1_1;dbr1_2	85	56	5.9653	6.18769	17.2	7.125	4.0513	3.81344	GTAAGTTTTTTAAAAGCATATTCTTTAGTTTTCTTCTTCGTTTTATCTCATTTCGTCTTTTTTTTTCCGCGGTGCTTAATGCTAATTCCTTTTCACTAG	UGCUAAU	UGCUAAU	15	31	UGCUUAA	22	1	NA	No	YES	No	No	No	NA	NA
I	5459174	5459274	101	-1	SPAC1039.05c	SPAC1039.05c.1:exon:2-SPAC1039.05c.1:exon:1	int_2361	36	17	19	0	0	21	2	2	A;A	ACCGCUAAUUU;AACCGCUAAUU	14;15	35;1	dbr1_1;dbr1_2	6	2	4.10959	4.33102	3.5	1.5	3.10285	3.20673	GTATGTGCAATGTGGGATTGGATAGGTAGTAGCAAACATACCTTCTGAAACTTGCTACAATTGACTTTTGTTTCAATAAAACCGCTAATTTCTAATTATAG	UUCUAAU	CGCUAAU	14	35		NA	NA	NA	No	No	No	No	No	NA	NA
III	1343125	1343204	80	1	SPCC338.17c	SPCC338.17c.1:exon:1-SPCC338.17c.1:exon:2	int_4647	4	2	2	0	0	3	1	2	A	CUGACUAACUG	14	4	dbr1_1;dbr1_2	6	2	2.22348	3.25226	7	1.5	2.41772	1.81645	GTATGTAGTTTATAAGTTTTCTTTAGCGCGTAAACAGTGCTAATTTGTCTTTGAATCGTCTGACTAACTGTTCGCGTTAG	GACUAAC	GACUAAC	14	4		NA	NA	NA	No	YES	No	No	No	NA	NA
I	570648	570884	237	1	SPAC2F7.17	SPAC2F7.17.1:exon:2-SPAC2F7.17.1:exon:3	int_90	19	11	8	0	0	16	2	2	A;A	AAUUCUAACAA;AAAUUCUAACA	9;10	17;2	dbr1_1;dbr1_2	16	9	4.53114	4.61145	5.66667	10	3.55348	3.35987	GTATGATATAAGACGAATTTGTCTCAAACTTGTAGTCAAAAGCTTTCCTTTTTTTTATTACTCTTCCTATTTATAGTAATCGATTTACAATGGTTTTTTTTTGCTAATGGGTCTATAACTTAAGACTTTTGCCAGGCATTTACTGTTTATCTAAGTAAAGCTATTTGATGAGCATGTTGAAATACTTAAATAACTAGTTTTTGAAAACCTTGATTTAAAAAAATTCTAACAATTTAG	UUCUAAC	UUCUAAC	9	17		NA	NA	NA	No	YES	No	No	No	NA	NA
II	1039903	1040188	286	-1	SPBC337.05c	SPBC337.05c.1:exon:4-SPBC337.05c.1:exon:3	int_3580	19	14	5	0	0	15	2	2	A;A	UUUACUAACCA;GUUUACUAACC	8;9	17;2	dbr1_1;dbr1_2	742	692	8.31101	8.06872	67.5455	49.5	8.77906	8.7971	GTAAGTTAATTCATTAACTGTACAATTTTTTTTGAGATACACTTGTTTGAACATTAAATAAGCGGATTTTTTTTCTTTGCGGACTTTATTTTAAGCTTCCTTTACCTTTTGATCCACTCATGTGCCTTACAAAAGGGCATTTTAGAAAGCACTTTGATTACCCTTTTATCAACGTTTTCATGTTTTATATAACTCTATCGTATTGACGCTTACTTTGTTTATTTATACTTCAAATATTTGTACATTGATTTGCTCTTAAAACCATTTTCTGTTTACTAACCATTAG	UACUAAC	UACUAAC	8	17		NA	NA	NA	No	YES	No	No	No	NA	NA
II	2320418	2320546	129	1	SPBC24C6.02	SPBC24C6.02.1:exon:1-SPBC24C6.02.1:exon:2	int_2860	10	8	2	0	0	9	1	2	A	AGCACUAACAU	11	10	dbr1_1;dbr1_2	45	31	5.41954	5.53871	9.2	6.4	5.1054	4.55767	GTAAGTTTTCAATTCTAAAATAAAAATTTTAGGTTCTGCTACATGTTTAACCTGTTCAAAAATTTTTATTATCTAAATGATACCAGGATTTTGTCAAATCAACAATTTACAAGCACTAACATAAACTAG	CACUAAC	CACUAAC	11	10		NA	NA	NA	No	YES	No	No	No	NA	NA
I	3659421	3659526	106	1	SPAC8C9.11	SPAC8C9.11.1:exon:2-SPAC8C9.11.1:exon:3	int_751	106	64	42	0	0	60	2	2	A;A	GUUACUAACUU;AGUUACUAACU	13;14	91;15	dbr1_1;dbr1_2	44	28	6.90023	6.38232	5.625	2.9	6.00465	5.7694	GTTCGTACTCTAAGTTTCAGGCATATAAGATAGAAAAAAGAAGAAGGAATCTGAAAAAAAAAAATGCTTTCAACTATTCTTAATCAGTTACTAACTTTAAATGCAG	UACUAAC	UACUAAC	13	91		NA	NA	NA	No	YES	No	No	No	NA	NA
II	296307	296404	98	-1	SPBC1773.07c	SPBC1773.07c.1:exon:3-SPBC1773.07c.1:exon:2	int_3407	67	42	25	0	0	38	2	2	A;A	GGUACUAACCA;UGGUACUAACC	15;16	66;1	dbr1_1;dbr1_2	326	450	5.04618	5.37452	109	75.1667	8.84048	9.42909	GTAAGTTTTTTTTTGGTAGAAATACCGATGTTTTATCAATCCAGTTGATATTAACAAATAACCCTATTTCAACTGTGGTACTAACCAAACCTCGTTAG	UACUAAC	UACUAAC	15	66		NA	NA	NA	No	YES	No	No	No	NA	NA
I	5008345	5008706	362	-1	SPAC890.04c	SPAC890.04c.1:exon:2-SPAC890.04c.1:exon:1	int_2279	57	35	22	0	0	27	2	2	A;A	CUUACUAACUU;CCUUACUAACU	10;11	49;8	dbr1_1;dbr1_2	24	30	8.49494	8.44241	2.5	15.5	2.61433	2.51912	GTATGTTTTCAGTTAACACATACTGGGTCAAAGCAGGAGAAAAGTCGCATAATTCAACCAACTTGAAGAAAATTTGAAGCAATAGAATAGCTGGTCTCATGCAAGGCCCAATTACTATAAAACTGTGTAGAAGCTGAAATTTGTTGGCGAGAATCAAATGGGGGCTTCTCGAATCTAAGAGTTACTCTAGTGTTCTTTTTCACGCCTTTCTTAAAATTTTGTAAAATTCTTGAAGATGCATTACTAAAAGCCCTTTTTTTATTTTTTTGTCTCTTTTACCTTTCATCCTCGTTTTGCTTCATTGCTATACAATTTTGCGATTTTTTAGTTAATTTAATTTATTTCCTTACTAACTTTACTAG	UACUAAC	UACUAAC	10	49		NA	NA	NA	No	YES	No	No	No	NA	NA
III	200277	200364	88	1	SPCC1235.11	SPCC1235.11.1:exon:2-SPCC1235.11.1:exon:3	int_4405	102	63	39	0	0	39	2	2	A;A	UUUGCUAAUAA;CUUUGCUAAUA	9;10	94;8	dbr1_1;dbr1_2	1674	1019	7.14487	6.67547	38.9535	56.6667	10.5056	9.94599	GTAAGTAGATGGAAAGGTTTAAAGATTGCTATCTCTCGTTTTTTTTATATTATTTATGGTTTAAAAGATTTCTTTGCTAATAAGATAG	UGCUAAU	UGCUAAU	9	94		NA	NA	NA	No	YES	No	No	No	NA	NA
II	1075040	1075097	58	1	SPBC1734.08	SPBC1734.08.1:exon:3-SPBC1734.08.1:exon:4	int_2543	4	4	0	0	0	2	1	1	A	UGAUCUAACCU	9	4	dbr1_1	37	23	3.32486	3.50976	9.5	6	5.53076	5.52256	GTAAGTTTCATGCACGTTTGAATGGACAAGTTAAAGATAATATGATCTAACCTCTTAG	AUCUAAC	AUCUAAC	9	4		NA	NA	NA	No	YES	No	No	No	NA	NA
II	2764683	2764754	72	-1	SPBC336.13c	SPBC336.13c.1:exon:2-SPBC336.13c.1:exon:1	int_3942	4	2	2	0	0	2	1	2	A	GUUACUAAUAA	12	4	dbr1_1;dbr1_2	15	18	2.52749	2.8193	4	6.33333	4.99216	4.6673	GTAAGTTCTTGGATCGTTGCAGGGTCTTTCGGTACTGAGTTTCCCTTTTTATCGTTACTAATAAGCAACAAG	UACUAAU	UACUAAU	12	4		NA	NA	NA	No	YES	No	No	No	NA	NA
I	2814517	2814927	411	1	SPAC1B2.04	SPAC1B2.04.1:exon:1-SPAC1B2.04.1:exon:2	int_606	47	30	17	0	0	29	3	2	A;A;A	UUUACUAACUA;GUUUACUAACU;ACUGUUUACUA	9;10;13	41;5;1	dbr1_1;dbr1_2	50	42	8.50587	8.44783	17	7.16667	4.2311	4.12298	GTATGTAAAAAAACGACGATAAGGGAATAGGTAATTGTTCGGCATGTTGCAATGCCTGAAAAGTAACTCCATTCAGCACTTTTATTATCAAATGCGGAAATAGGAATGCTGGGAACTGCAAAGAATAAAATGAACACGAAAGCAGTCTGTTTTATCATTGACTTTTGAGTACCCAATACTGAAAGTGGTTTGAATATTTTCATTTTAGCATCTCTAGAATGATAGTAAATGAGCGTTCATAGCTATTTATTTGTCTGCTATTTTTTGTTCTTTTCTCAGTTTTCACGTTTTTAGTTTTTACACAAGAAAAATTGACCATTTTTCCTTCTTTGGAAGCTTATTCTTACTTCTGCTCTGCTCTGCTTTTCCTTTATTTAAAATTTCTTGTTTTACTGTTTA…	UACUAAC	UACUAAC	9	41	UGUUUAC	13	1	NA	No	YES	No	No	No	NA	NA
I	419503	419601	99	-1	SPAC31A2.15c	SPAC31A2.15c.1:exon:2-SPAC31A2.15c.1:exon:1	int_1208	49	29	20	0	0	30	2	2	A;A	UGAUCUAACAU;AUGAUCUAACA	13;14	39;10	dbr1_1;dbr1_2	10	3	4.03153	3.6818	5.5	4	3.34392	2.69819	GTATGTGTTTCCTTGTGTATAAATAACCTGAAGTTGAATCATTACTTTTTTATTTTTTATATCGCTATTTGACAACTTATGATCTAACATCGATAATAG	AUCUAAC	AUCUAAC	13	39		NA	NA	NA	No	YES	No	No	No	NA	NA
II	3433006	3433091	86	-1	SPBC4B4.10c	SPBC4B4.10c.1:exon:2-SPBC4B4.10c.1:exon:1	int_4129	14	6	8	0	0	13	1	2	A	UUUGCUCACCA	17	14	dbr1_1;dbr1_2	15	9	4.75658	3.24104	2.66667	2.5	4.79464	4.40591	GTATGTGATTTGTTCACTCAAGTAGTAATTTAATATTCTTTAACTCAATTTATTTTTTCCTTTTTGCTCACCATATTCTACCTAAG	CUUUAAC	UGCUCAC	17	14		NA	NA	NA	No	No	No	No	No	NA	NA
III	1541662	1541788	127	-1	SPCC1753.01c	SPCC1753.01c.1:exon:2-SPCC1753.01c.1:exon:1	int_5163	12	10	2	0	0	10	2	2	A;A	AAUACUAAUUU;AUAUCUAAUAC	17;23	11;1	dbr1_1;dbr1_2	93	80	5.18122	5.24847	6.26667	11.5714	5.95442	5.78831	GTAAGTGGGATAAAATACTAAAACTATTGTTTGAATAACCGCAAGGTGATACTTTTTGGTTGATAGTTTTGTACTAGCACTGACCTTATTCATAAAAATATCTAATACTAATTTTTCCAATGTTTAG	UACUAAU	UACUAAU	17	11	AUCUAAU	23	1	NA	No	YES	No	No	No	NA	NA
II	3729961	3730060	100	1	SPBC13G1.02	SPBC13G1.02.1:exon:2-SPBC13G1.02.1:exon:3	int_3230	10	5	5	0	0	9	2	2	A;A	UUUGCUAACUA;UUUUGCUAACU	10;11	9;1	dbr1_1;dbr1_2	27	24	3.68583	4.02344	4	3.125	4.80844	4.93033	GTACGTCTTATTTAGAATTTATATGTTGGTAAAATACGTAATCCAGTTTTACTTTCTAGTTGCATTTGAAACATAAGAGCTATTTTGCTAACTAAATTAG	UGCUAAC	UGCUAAC	10	9		NA	NA	NA	No	YES	No	No	No	NA	NA
III	216499	216590	92	1	SPCC1235.15	SPCC1235.15.1:exon:3-SPCC1235.15.1:exon:4	int_4411	20	9	11	0	0	15	2	2	A;A	CUUGCUAACCA;UCUUGCUAACC	11;12	12;8	dbr1_1;dbr1_2	39	31	4.60681	4.6673	40	32	4.91663	5.13009	GTAAGATTGAATTTTAGTATTTTTAGATAGCTTAAAAAGTCGTCGAATTACTTTGATGTTGTTTACTTTAGTATCTTGCTAACCAACACAAG	UGCUAAC	UGCUAAC	11	12		NA	NA	NA	No	YES	No	No	No	NA	NA
II	2016420	2016569	150	1	SPBP23A10.10	SPBP23A10.10.1:exon:1-SPBP23A10.10.1:exon:2	int_2783	77	34	43	0	0	41	2	2	A;A	UAUUCUAACGU;GUAUUCUAACG	15;16	69;8	dbr1_1;dbr1_2	5	0	7.71652	7.98151	0.352941	0.047619	3.05356	-16.6096	GTATGCTATATTCCTTGATAAACTCGATTATCAGCGCTGTATGAAAGATTGTAGTTATGTTTATGTAATTGATCATCCTCATCGTCATTTCTATAATCTATTTAGATACATTTCGTATCCCAAGTAAGTATTCTAACGTTGAATGTTTAG	UUCUAAC	UUCUAAC	15	69		NA	NA	NA	No	YES	No	No	No	NA	NA
I	3465445	3465541	97	-1	SPAC3A11.04	SPAC3A11.04.1:exon:2-SPAC3A11.04.1:exon:1	int_1923	27	14	13	0	0	14	2	2	A;A	CAAACUAACUU;ACAAACUAACU	15;16	26;1	dbr1_1;dbr1_2	0	0	2.23501	3.06739	0.5	1	2.12911	2.05414	GTAAGTTTTACTTTTTGATTTACCTTCTTCATTTTTTTTACTTTACTCAATTTCTTTACCTGTTATACTTTTTCACAAACTAACTTGTCCTTACTAG	AACUAAC	AACUAAC	15	26		NA	NA	NA	No	YES	No	No	No	NA	NA
III	2223315	2223629	315	1	SPCC1919.09	SPCC1919.09.1:exon:2-SPCC1919.09.1:exon:3	int_4836	24	21	3	0	0	15	2	2	A;A	UUCACUAACUU;UUUCACUAACU	13;14	21;3	dbr1_1;dbr1_2	206	175	10.122	10.0611	69	88	7.52297	7.43401	GTAAGCTTAACGTTTATTTGATGCCAAAATTTAATGTTCTAAATGTAAACGATTCAAAATTTTTTTAAAGGTTCTTAAAATCCTTAACCAGTCGAACGTATTATGAGAAAAATAAATAGCACATATGTGAATGATGTAGCCTAACTACTCTTTAATTGAGTAAAAGAGACTTTGCTACATAAATGCAAACCACTACTTAAACTCTGGCGGTTTGCTGTTCATTACCTTTATTATTCCTTGACTCGATGCAGCTCGACAAATTATTTTTTTTGGCATTTTTTACATTTATCAACTTTTCACTAACTTTTATAACAG	CACUAAC	CACUAAC	13	21		NA	NA	NA	No	YES	No	No	No	NA	NA
II	267860	267967	108	1	SPBC800.09	SPBC800.09.1:exon:3-SPBC800.09.1:exon:4	int_2399	13	7	6	0	0	13	1	2	A	GAUUUUAACUA	11	13	dbr1_1;dbr1_2	54	27	5.71863	6.10224	27.5	7	7.22084	7.17631	GTATGTTACGTCTAAAGAGTGGTGGAGATTCTCATTAGTATATCTAGTATTAATTATCTTTGGCACTCTTTATATATCTGACAAGATCATGATTTTAACTATAATTAG	AUCUGAC	UUUUAAC	11	13		NA	NA	NA	No	No	No	No	No	NA	NA
III	422887	423309	423	-1	SPCC306.08c	SPCC306.08c.1:five_prime_UTR:2-SPCC306.08c.1:exon:1	int_4941	6	6	0	0	0	5	2	1	A;A	UUUUCUAACUU;UUUUUCUAACU	13;14	5;1	dbr1_1	40	28	8.87105	8.84101	41	29	6.04649	6.21691	GTAAGTAAAAGTGAGTATGCAAAACGATCAAGTTACATCCCAATTTGCCAGAAAAAATATTTTAAAAATGAATAAACCGACGTAAATACTACTCTTGAGACCTTTTTATACACACGAAAGTCGATATTTTTTTTGGAAAAAAGTCTTGACATAAACAGCTACGCCAGTCTTTATGTACCGTACCCGTTTCTCCGAGGTCACTAGGTACAGGACTTTCTGAAGGAATATTTTATAAGAGATGCTATACGCATATGCTTTTTTATGCTTAGAATCGGCATGAGGAGTTTGTTTGTAACCAGGATGTCGAGTAGCTTTGCTTTGCTAGTCAGTCCGTATAAACGTTATGGTGTAGGATGCGGCTACTCATGTTTGCATATATATACATATTTTATTTTCAAC…	UUCUAAC	UUCUAAC	13	5		NA	NA	NA	No	YES	No	No	No	NA	NA
II	3105531	3105651	121	-1	SPBC1778.05c	SPBC1778.05c.1:exon:2-SPBC1778.05c.1:exon:1	int_4022	28	12	16	0	0	20	3	2	A;A;A	GGUAUUAACAA;AGGUAUUAACA;CUGAGGUAUUA	9;10;13	25;2;1	dbr1_1;dbr1_2	9	4	4.54408	4.272	10	1.66667	2.01354	2.25955	GTAAGCATTTAGTGAATTTGAAGTTCATTCTTACTTCAAATCCAGTGGGTACACCTGTACTATTTTGGAGCTTAGATATATAAGTTTATTGTTGAAATATTCTGAGGTATTAACAAACTAG	UAUUAAC	UAUUAAC	9	25	GAGGUAU	13	1	NA	No	YES	No	No	No	NA	NA
II	2359694	2359844	151	1	SPBC19G7.06	SPBC19G7.06.1:exon:2-SPBC19G7.06.1:exon:3	int_2873	17	8	9	0	0	13	2	2	A;A	AAUAUUAACAU;UAAUAUUAACA	16;17	16;1	dbr1_1;dbr1_2	2	1	5.42248	5.68628	0.333333	0.153846	2.76078	2.71556	GTATGTTTCATATTTCCCGTTTTTCTGATCCTTTTCTGTCATATCCTTTCAATGTAAAGTGAATACATTATAGGGAAGGTGATGAAGGTCAACAACCAGAAAACGTGGCAATGTTTTTACAAGTTTTTAATATTAACATACACCTCTTTAG	UUCUGAU	UAUUAAC	16	16		NA	NA	NA	No	No	No	No	No	NA	NA
I	1171271	1171361	91	-1	SPAC22A12.08c	SPAC22A12.08c.1:exon:4-SPAC22A12.08c.1:exon:3	int_1384	6	5	1	0	0	6	1	2	A	AAUGCUAACAG	13	6	dbr1_1;dbr1_2	32	31	4.86769	4.61894	1.03125	1.33333	5.58699	5.64176	GTAAGTTATTTCTTGGAAAGTATCTTTTGTGTAAAAATATTTTTGCAAGCTGTACTCGAATACTATGAGTGAATGCTAACAGCTTTTATAG	UGCUAAC	UGCUAAC	13	6		NA	NA	NA	No	YES	No	No	No	NA	NA
III	1737779	1738212	434	-1	SPCC1450.07c	SPCC1450.07c.1:five_prime_UTR:2-SPCC1450.07c.1:exon:1	int_5195	26	17	9	0	0	17	2	2	A;A	ACUGCUAACUU;GACUGCUAACU	19;20	24;2	dbr1_1;dbr1_2	0	0	7.4381	7.34454	1	0.5	1.23253	-1.06059	GTAAGTAATCTATACGGATAACCGGAGGTTTCGTTATACTTGTTTACAGAAAATCACGGCACTTTGATACGGCGTTTATGGTAAAAAAACCGGAGAACTCCCCAATGTGGATTATGCATCGTTAAAGCGCTTTAGTTGGTACTTTTGTTTGTACAGGGATTGTAGCGAATTGAACTGCTGAAAGTGATTAATATATGTATAGTTGTTACAATACAATATCATCCATTAGAAATTCTTCTATATTGTATGCAAAAGTGCATGCAAGCATATATTAATCCAATATGGTACTGTTTAACTTCAATCCTCTAATACTTGATTTGCCTGTTACACTGTATTTTCCCATTGTAACTGCTTTTAATTTTTTACTCTACCTCTAATCCGTTAATGACATTGCCAATT…	UUCUAAU	UGCUAAC	19	24		NA	NA	NA	No	No	No	No	No	NA	NA
I	4645723	4645853	131	1	SPAC30C2.08	SPAC30C2.08.1:exon:1-SPAC30C2.08.1:exon:2	int_945	43	18	25	0	0	28	2	2	A;A	UUUGCUAACUA;UUUUGCUAACU	17;18	35;8	dbr1_1;dbr1_2	328	273	8.13322	8.34296	109.667	137	8.72404	8.47465	GTATGTAATTCGCTAATATTTGTGTCAAATTATGGATGCATATGGATGAATGAATGGTCATCTGTGGGATAAATATTTGGCTCAAAATTTTGAAATTTAAACAAATTTTTGCTAACTAAGTTTCATTATAG	UGCUAAC	UGCUAAC	17	35		NA	NA	NA	No	YES	No	No	No	NA	NA
III	1573734	1574015	282	-1	SPCC162.07	SPCC162.07.1:exon:2-SPCC162.07.1:exon:1	int_5167	2	1	1	0	0	2	1	2	A	GUUACUAACAU	10	2	dbr1_1;dbr1_2	0	0	8.14957	8.13045	0.00149477	0.00232019	8.6641	8.54608	GTAATTTTGTACTTTCTAGTCTAGTATTTTTTATCATATCATTAGAATAGTGAAAAGAAGTTGGAATAACTTGGAAAGTCGTTCAATCCTTCTTTTCTATCTTCCCCATCATCTCATCTGAAATTTGCTTCTTCTTCTTCATTGATTTCTAGTTTTTCTTGATTTGCCTCCCTGCTGCGTACGTGCCCGATTGACACACCTCATCTCTCATGTGGTGCTGAGCATACACGTACTTGGATGCACTCCATTCAATATTCTATGAATTGTTACTAACATTCGCAG	UACUAAC	UACUAAC	10	2		NA	NA	NA	No	YES	No	No	No	NA	NA
I	4991206	4991275	70	1	SPAC1952.13	SPAC1952.13.1:exon:1-SPAC1952.13.1:exon:2	int_1035	2	1	1	0	0	2	1	2	A	AUAUGCUAACA	18	2	dbr1_1;dbr1_2	35	41	4.15309	3.44491	3.6	8.4	6.25519	6.40715	GTAAGTTCTCAATAATTAGAAATGATGGGTTAAACAATTGAACAAATATGCTAACAGTGTTCGTAAATAG	UGCUAAC	AUGCUAA	18	2		NA	NA	NA	No	No	No	No	No	NA	NA
III	188150	188322	173	1	SPCC1235.16	SPCC1235.16.1:exon:1-SPCC1235.16.1:exon:2	int_4395	31	21	9	0	1	23	2	3	A;A	CUUACUAACUU;ACUUACUAACU	13;14	25;6	dbr1_1;dbr1_2;wt_2	5	15	8.08296	8.09995	3	16	3.50979	3.78872	GTAAGTTTATTAATTATTAGTTTATTTCTTTACGCCGGACTGCGAATTGGTTTTAAGAAATTCCATACAACCTTCCACAACAGTCTATAATCTTAGGTCTCTTATATTGTTTATTCCTTTTATATTCTTAACTAAATATGTTGGAAATGAAAACTTACTAACTTTCGTAATAG	UACUAAC	UACUAAC	13	25		NA	NA	NA	No	YES	No	No	No	NA	NA
I	3444097	3444281	185	1	SPAC3A11.12c	SPAC3A11.12c.1:exon:1-SPAC3A11.12c.1:exon:2	int_712	68	37	31	0	0	35	3	2	A;A;A	UUCACUAACAU;AUUCACUAACA;AAAAUUCACUA	13;14;17	61;6;1	dbr1_1;dbr1_2	143	77	8.06448	8.25096	36	19.5	9.12364	8.85913	GTAAGTCATTCAATGAACCTCTAGATAAGTGTTGGGAAAACCGAAATCTTTTTCTTTTATAATTTCTTTATTCACAGAGAACGAAGATCTGATAATGTTTTGCCCTCATCCTTAAATGAAGGTGGAAAGATGAATGCGGTCGAATGTTCTTTTCTAGAAGTAAAATTCACTAACATAGATTGTAG	CACUAAC	CACUAAC	13	61	AAUUCAC	17	1	NA	No	YES	No	No	No	NA	NA
I	2058045	2058336	292	1	SPAC732.01	SPAC732.01.1:exon:5-SPAC732.01.1:exon:6	int_438	2	2	0	0	0	2	1	1	A	UUUAUUAACCA	9	2	dbr1_1	51	53	6.50759	6.63229	52	54	5.54767	5.83948	GTATGTTAAATAAGCTTTGTGTGAAGTTTCAACATAATTGGATCTATTCATGCCTTAATCTTCATCTTGTATTTTGCAAAGATTGTAATTCTTTGGACTATACGTCTACTAAAGTGGTTGTTTGTCTACCGACATACATTCTTTTTTTTTTATGTACATGTTACTTTCCATTGTAGAGTTTTGTTTTTTTCAAAGAGCTTTTACAAATGGAGTTAGTGAGATGATCCATCATTTGAAGCTTCAATAGTATTTGACTTTTCCCAATTAGTTTTGATTTTTATTAACCAAGTAG	UAUUAAC	UAUUAAC	9	2		NA	NA	NA	No	YES	No	No	No	NA	NA
II	1284663	1284739	77	-1	SPBC3D6.08c	SPBC3D6.08c.1:exon:4-SPBC3D6.08c.1:exon:3	int_3640	11	5	6	0	0	8	2	2	A;A	UGGGCUAAAUA;GUGGGCUAAAU	14;15	8;3	dbr1_1;dbr1_2	494	306	5.1087	4.72244	21.5217	30.7	7.84993	7.40554	GTAAGTTTCGTTTGTAACATAAAATATTCGAGCATCTTTATAAATTTCTTTGAACGTGGGCTAAATATTTCGAAAAG	GCUAAAU	GGCUAAA	14	8		NA	NA	NA	No	No	No	No	YES	YES	NA
I	1586864	1586943	80	1	SPAC23H4.13c	SPAC23H4.13c.1:exon:1-SPAC23H4.13c.1:exon:2	int_347	19	12	7	0	0	8	1	2	A	CCAACUCACCA	12	19	dbr1_1;dbr1_2	11	10	3.754	3.93033	2.4	1.57143	2.34827	2.49569	GTAAGTACACATTCTTAGCAAGTTGTGGTTAGTTTTTATATTTACTGGTTCTTATTTACGTCCAACTCACCAAATTCTAG	ACCAAAU	AACUCAC	12	19		NA	NA	NA	No	No	No	No	YES	NA	NA
I	5098406	5098506	101	-1	SPAC1250.03	SPAC1250.03.1:exon:3-SPAC1250.03.1:exon:2	int_2303	68	37	31	0	0	39	2	2	A;A	UUUUCUAACCU;AUUUUCUAACC	10;11	65;3	dbr1_1;dbr1_2	310	279	5.57525	5.72333	155.5	56	8.25929	8.3991	GTAAGCATTTTATCGTATTTCTGTATGGAGTAATCATTGATCACATTTTTAAACGAGATACATAATTATTTATATATTTATGAATTTTCTAACCTGTTTAG	UUCUAAC	UUCUAAC	10	65		NA	NA	NA	No	YES	No	No	No	NA	NA
I	1354420	1354687	268	1	SPAC19E9.02	SPAC19E9.02.1:exon:1-SPAC19E9.02.1:exon:2	int_310	12	7	5	0	0	8	3	2	A;A;A	UAUGCUAACUA;UUAUGCUAACU;UUGAUCGAUAU	10;11;49	10;1;1	dbr1_1;dbr1_2	33	34	6.77904	6.65106	3.77778	11.6667	4.11245	3.91241	GTAAGTTTTAATCTTATTTTCACTGAAATTGGTTATTGGATAGCAAAATTCTTTCTTGTTTTCAGTTTATTTGCGAGCAACTACTTGTGGTTGGCAAATGAATCTATAGCATTGAATCAATTGTTTTCTTAAGAAACAGGGAAACTATATTGATTTAAATGCTTTTCGCTATTGTTTGTACTCTATTCAAAACAGTTTTTCAAATTGAAACTTTGATCGATATTTTTTTTTGCAACTCCTTTTTTATGCATTATGCTAACTATTATAG	UGCUAAC	UGCUAAC	10	10	GAUCGAU	49	1	NA	No	YES	No	No	No	NA	NA
I	4902002	4902132	131	1	SPAC19B12.10	SPAC19B12.10.1:exon:2-SPAC19B12.10.1:exon:3	int_1012	39	26	13	0	0	25	4	2	A;A;A;A	CUUACUAACAA;ACUUACUAACA;AAAACUUACUA;GAUAUUUACCC	12;13;16;73	31;4;3;1	dbr1_1;dbr1_2	4	2	6.26093	6.39543	0.833333	1.5	3.15665	2.59049	GTTCGTTGATGTAATATAGTCATGCACTAGGAATATGCACATTTGCATCCAGATATTTACCCTGTACAATTTTGAATGGGATTGTTTTTCTTTAGCTGAATTTTTATAAAAACTTACTAACAATGTAATAG	UACUAAC	UACUAAC	12	31	AACUUAC	16	3	NA	No	YES	No	No	No	NA	NA
I	2828350	2828628	279	-1	SPAC3F10.06c	SPAC3F10.06c.1:exon:2-SPAC3F10.06c.1:exon:1	int_1790	20	9	11	0	0	14	2	2	A;A	UUGGCUAACAC;UUUGGCUAACA	14;15	16;4	dbr1_1;dbr1_2	4	3	7.71795	7.39649	0.714286	0.8	5.24773	5.6673	GTAAGTCTCAATTTGCTATACAAATAAGCTGGCAGAATCAAAAGACTTAGAAAATGATTGCTACCTTTATAAACGCACAAGCAATTAATGCAAATTGTAAGAAAAAACGATGGATAGCTGCTATTAAATTTTCATGAAAAATTTTTAGCCTAATCGCCATTTGTTGGATTTCGTACTGATATATATTTTTGCTGATTTTTACTTGTTTTTCCTTTTTGCCTTGCTTTTCTTTTATTTGTATGTCATCGAATGGAAAATTTGGCTAACACTAATTTCAAG	CACUAAU	GGCUAAC	14	16		NA	NA	NA	No	No	No	No	No	NA	NA
I	388622	388720	99	1	SPAC31A2.02	SPAC31A2.02.1:exon:2-SPAC31A2.02.1:exon:3	int_46	20	12	8	0	0	14	2	2	A;A	CAAUCUAACCA;CCAAUCUAACC	11;12	19;1	dbr1_1;dbr1_2	7	16	5.17239	5.48089	1.6	4.25	5.49748	5.62423	GTTTGTGCTCTTATAGTTGGATTGATGAAGAAATGATATGTTGTGTCGGATTAAAATTTTCATAATCCAATGTTGTTAAGCCAATCTAACCATAACTAG	AUCUAAC	AUCUAAC	11	19		NA	NA	NA	No	YES	No	No	No	NA	NA
I	3469846	3469903	58	-1	SPAC3A11.02	SPAC3A11.02.1:exon:2-SPAC3A11.02.1:exon:1	int_1925	6	2	4	0	0	6	1	2	A	UUCACUAACAA	10	6	dbr1_1;dbr1_2	44	20	5.07209	4.45317	2.14286	1.23529	4.03643	3.51009	GTAAGAAGGCTGTGGACGACGATCACGGAGAGTTGAGCAGATTCACTAACAAAGTTAG	CACUAAC	CACUAAC	10	6		NA	NA	NA	No	YES	No	No	No	NA	NA
II	1591563	1591654	92	1	SPBC28F2.12	SPBC28F2.12.1:exon:5-SPBC28F2.12.1:exon:6	int_2702	25	12	13	0	0	15	2	2	A;A	AUAGCUAACAC;GAUAGCUAACA	11;12	24;1	dbr1_1;dbr1_2	78	60	5.85192	5.98923	19.75	15.25	6.32658	6.47465	GTATGTGTTACAACTGTTTGGTTTGTTATAAAAACACCTTTTTTTTTCAGCAACCTTCTAAACTCAATAAAAAGATAGCTAACACCTTTCAG	AGCUAAC	AGCUAAC	11	24		NA	NA	NA	No	YES	No	No	No	NA	NA
I	5004836	5004902	67	1	SPAC890.03	SPAC890.03.1:exon:2-SPAC890.03.1:exon:3	int_1046	2	1	1	0	0	2	2	2	A;A	CUAUCUAACAA;GCUAUCUAACA	17;18	1;1	dbr1_2;dbr1_1	16	11	5.00984	5.09306	1.13333	1.2	4.34446	4.43464	GTACGATACTTTTGTGTTATTGTGAACGCTCAATACTGGACGGCTATCTAACAAGCATGGGTTGTAG	AUCUAAC	AUCUAAC	17	1		NA	NA	NA	No	YES	No	No	No	NA	NA
I	1728731	1728816	86	-1	SPAC664.12c	SPAC664.12c.1:exon:2-SPAC664.12c.1:exon:1	int_1536	31	10	21	0	0	15	3	2	A;A;A	UGUACUAACUA;UUGUACUAACU;CUAACUAAUAC	12;13;8	22;6;3	dbr1_1;dbr1_2	17	15	2.75658	2.04839	18	8	2.33384	2.48634	GTATGTCTATACATAGCGTTTGCGAATCTGCCTTATTCAAGTATTTTACATCTTATGCTCTTTCTTTTGTACTAACTAATACGTAG	AACUAAU	UACUAAC	12	22	AACUAAU	8	3	NA	YES	No	No	No	No	NA	NA
I	3649828	3649938	111	1	SPAC8C9.05	SPAC8C9.05.1:exon:3-SPAC8C9.05.1:exon:4	int_745	183	99	84	0	0	39	2	2	A;A	UUCUCUAAUAA;UUUCUCUAAUA	11;12	176;7	dbr1_1;dbr1_2	59	61	7.16603	7.29495	8.57143	3.64706	6.40015	6.74005	GTGAGCATATTTAAAAATCAATCGTGCAAGCAATTTCTTCGAATGATTAATAACTCGTTTTTGGCTTGTCTTCAAGTTGTCCGTTGTAACCCTTTCTCTAATAAAAAACAG	CUCUAAU	CUCUAAU	11	176		NA	NA	NA	No	YES	No	No	No	NA	NA
I	4705225	4705309	85	-1	SPAC1834.06c	SPAC1834.06c.1:exon:3-SPAC1834.06c.1:exon:2	int_2197	21	11	10	0	0	12	2	2	A;A	UUUACUAACUU;AUUUACUAACU	11;12	19;2	dbr1_1;dbr1_2	29	20	4.60995	5.0908	30	10.5	3.78377	3.31815	GTACGTATTATCCCCAAATAAAACTTCTGTCGTTGCAATGTTTTTATATACTCCCGCTAGTTTTGCATTTACTAACTTTAATCAG	UACUAAC	UACUAAC	11	19		NA	NA	NA	No	YES	No	No	No	NA	NA
III	697753	697874	122	-1	SPCC16C4.16c	SPCC16C4.16c.1:exon:3-SPCC16C4.16c.1:exon:2	int_5024	53	25	28	0	0	34	2	2	A;A	AUUACUAACAC;AAUUACUAACA	14;15	51;2	dbr1_1;dbr1_2	15	14	5.96831	6.08529	0.727273	0.681818	4.66686	4.73441	GTATAACTTGTGAAAACCAAATTAGTCCGGGTGCACTCATACTTTTCAAAAATCATTTCCTCTACTTTTGAGAATCTCCTTTTACTCAATTTTATATTCAAATTACTAACACTTTCGCACAG	UACUAAC	UACUAAC	14	51		NA	NA	NA	No	YES	No	No	No	NA	NA
III	1662249	1662492	244	-1	SPCC663.15c	SPCC663.15c.1:exon:2-SPCC663.15c.1:exon:1	int_5187	23	12	10	0	1	21	2	3	A;A	CUUGCUAACUG;GCUUGCUAACU	14;15	22;1	dbr1_1;dbr1_2;wt_2	28	14	8.06954	8.20009	29	7.5	5.10418	4.99745	GTATGTTTTTTAGCGACGTCATTCAGTAAAACGGTCTTATCAAAACGAAGCAAGCTGAGCCGAAAATGGCATGTCTTTGCTTAAAATGCTTGGTTGGTTTCATCCGCTTTGGGCTTCAATGTTGGTCATAAGCATCAGAGCAAGGTCAAGCTGTTGTACCAGTAATTAGTTTGGTGTAATTTGTCGTTCCTACGTTGATGAAGTAGTTGATTGCTTTGTCTAGCTTGCTAACTGTAAATGACAG	UGCUAAC	UGCUAAC	14	22		NA	NA	NA	No	YES	No	No	No	NA	NA
I	4978755	4978880	126	1	SPAC1952.07	SPAC1952.07.1:exon:1-SPAC1952.07.1:exon:2	int_1033	17	8	9	0	0	14	1	2	A	UUCACUCACAC	10	17	dbr1_1;dbr1_2	2	1	3.39821	3.89947	0.6	0.4	2.15706	2.8914	GTAAGACAAGTCGAGTCTCACATCTATGATCGTTAAAAAATTTGAAGCTACTTAATAAAGTTTCATATATTAATGCGATTCTTGAAATGCATTCACTTTTTCTTTATTGTTCACTCACACATTAAG	UAUUAAU	CACUCAC	10	17		NA	NA	NA	No	No	No	No	No	NA	NA
II	1460623	1460761	139	1	SPBC32H8.05	SPBC32H8.05.1:exon:1-SPBC32H8.05.1:exon:2	int_2666	151	106	45	0	0	70	3	2	A;A;A	UUAUCUAACAA;AUUAUCUAACA;CCUUCUCAUAC	12;13;34	122;27;2	dbr1_1;dbr1_2	21	13	7.40883	7.45825	7.33333	2.8	4.46859	4.03343	GTATGTTGTATAGTATAGACAAATGAAGGGATTGAATGTCTTTTTTTTTGGTTTCGGAAACGGTTTATGTACAATGGAACCGTCTTTAAAACAATTGCCCTTCTCATACCTCTTTATCGATTATCTAACAAAGTAATAG	AUCUAAC	AUCUAAC	12	122	UUCUCAU	34	2	NA	No	YES	No	No	No	NA	NA
III	1977828	1978011	184	-1	SPCC18.12c	SPCC18.12c.1:exon:3-SPCC18.12c.1:exon:2	int_5260	12	9	3	0	0	9	2	2	A;A	UUUACUAACUG;AUUUACUAACU	11;12	10;2	dbr1_1;dbr1_2	49	44	7.16254	7.37496	12.5	22.5	5.02297	5.0205	GTAAGTTTTGTTTATAAGTGTTTTCTTTTACTGGAAAAAAGGGCGAACCCCCGGAATATGAAACAGAACGGAAAGTTTAATTATTCAACATAGTATCTTTTCATCCGGGTCTGGTTTATTATTTTCTTTCCTTATGTTCTCCTTGTAAATTATTATAACTAACGGATTTACTAACTGACTATAG	AACUGAC	UACUAAC	11	10		NA	NA	NA	No	No	No	No	No	NA	NA
III	698128	698179	52	-1	SPCC16C4.16c	SPCC16C4.16c.1:exon:2-SPCC16C4.16c.1:exon:1	int_5025	2	2	0	0	0	1	1	1	A	UAGUCUAACUC	19	2	dbr1_1	20	12	1.67505	0.966866	10.5	13	5.02185	5.05063	GTAAGAAGCGAAAACTGGCAAAGGGTTAGTCTAACTCTATAACCGCGTATAG	GUCUAAC	GUCUAAC	19	2		NA	NA	NA	No	YES	No	No	No	NA	NA
III	1632964	1633168	205	1	SPCC663.17	SPCC663.17.1:exon:1-SPCC663.17.1:exon:2	int_4704	11	7	4	0	0	8	1	2	A	UUUACUAAUGC	10	11	dbr1_1;dbr1_2	1	1	3.6029	4.09634	2	2	2.19001	2.21173	GTACGTTATGTTGTTAATATGAAAGAAAACATTATAGTAAAAACTGTATCTTGATGTTATTTAAAAATAACATGTTTGTGATTATTTGGTTACATTCGACTTACTCAAATTTTCGATTCTAAGCGCGGTGAGCTTTTTTTTTCTTTCAAATATAATATAAATTCCTGTTAATGTTTGAAGTTTCAGCATTTACTAATGCATTCAG	UACUAAU	UACUAAU	10	11		NA	NA	NA	No	YES	No	No	No	NA	NA
I	3537789	3537984	196	1	SPAC1B1.01	SPAC1B1.01.1:exon:1-SPAC1B1.01.1:exon:2	int_734	12	6	6	0	0	12	3	2	A;A;A	UCAGUUAACCU;AACCUUUAGNN;AUCAGUUAACC	8;2;9	10;1;1	dbr1_1;dbr1_2	2	4	6.24459	6.18187	1.5	2.5	5.61684	5.59348	GTATGTTTTTTATTATTAATTCGCTCCATCTTGTATAGTTTGATAGATCTTTGTTGGATATAAACAAAAAAAGACTTGGTCTTGTTAAAGTTGCTTTGCTTCCAATTATTCGTTTTACGGTTGAATTGGTGTATCCTTCACTCATCTATCAGTTTGTTCATACGTAATTCTTCTTTTTTCATCAGTTAACCTTTAG	AGUUAAC	AGUUAAC	8	10	CCUUUAG	2	1	NA	YES	YES	No	No	No	NA	YES
II	2785655	2785943	289	-1	SPBC32F12.01c	SPBC32F12.01c.1:five_prime_UTR:2-SPBC32F12.01c.1:exon:1	int_3955	28	12	16	0	0	20	1	2	A	UAAGCUAAUAA	14	28	dbr1_1;dbr1_2	48	32	7.1224	6.90811	49	33	4.45988	3.93612	GTAAGTTATGAATGAAATGCATTGAGGCTGTAATTGTTGCAATTGGTATTTTAATGTCTCAAAACACTTCTTTAATACTGTTATGAGCTTTTTGTCGAAAATTGCTGGTCTTCTGCTTTCGTGGAAGAAAAGAGACAGAGTCTTTATAATTCATGCTGTTAATGACATTGGCTTGGTTTAAGACCACGATGGTGCTTTTTGTTTGTTTTTATACTAATTCAGCAATTTCGTCTCTTTATCCATTTTTTTCTTAAATTCTCTTTCTTCTTAAGCTAATAAACTTTGTTAG	AGCUAAU	AGCUAAU	14	28		NA	NA	NA	No	YES	No	No	No	NA	NA
II	1381144	1381499	356	-1	SPBC8D2.12c	SPBC8D2.12c.1:exon:2-SPBC8D2.12c.1:exon:1	int_3658	1	1	0	0	0	1	1	1	A	CAUAUUAACCU	10	1	dbr1_1	10	6	6.1092	6.14576	1.1	0.7	4.37549	4.12673	GTAAGTTATTGATTTATAAGCTAGTTATAGTGTTTTTGCTTCTATGAATTTTCAAGATAAAACAAAAGTAAAAAACGAGACCCATTGTAGTAAAGAATGTAGGCTACTCAATGTTGACTATGATTCTTTGCTGAATTACTGGGATCTTTCACATAAGACAGAAGAATTGAAAGTGATAAAATTTGAACTGTATTCATATCCACTTTTATAAAGTGTTCAGTTAATTGCTCGAACATACAATTAAGTGAATGTTCAGGTTTTCTTGCAAACTGGGTTACTGTCAACAACAGTGAATTTATAAGATCCATAGACACTATAATGTTACCAGTTTTATATACGCATATTAACCTTTATAG	UAUUAAC	UAUUAAC	10	1		NA	NA	NA	No	YES	No	No	No	NA	NA
III	1026575	1026701	127	1	SPCC825.02	SPCC825.02.1:exon:4-SPCC825.02.1:exon:5	int_4590	10	7	3	0	0	10	1	2	A	UUAACUGACUU	14	10	dbr1_1;dbr1_2	183	93	5.39803	5.47303	184	94	6.98584	6.75256	GTATGGGAAACATAATTATTGTATTATTTAGTCACAGAAAAAGTAGAAAATTTGATTTTTTCCTTTTTCTTTTTATTATTTAGCTGCGTGGTCAAATGTTTCAACTTTAACTGACTTTGAGAATTAG	AACUGAC	AACUGAC	14	10		NA	NA	NA	No	YES	No	No	No	NA	NA
I	1372045	1372280	236	-1	SPAC57A10.14	SPAC57A10.14.1:exon:1-SPAC57A10.14.1:three_prime_UTR:1	int_1431	6	4	2	0	0	6	1	2	A	UUCACUAACUU	18	6	dbr1_1;dbr1_2	3	5	6.5856	6.47465	1	3	4.5884	4.59146	GTAAGTACCTGATTTCTCTATGTGTAATTGTTTTTCCTTTCAAAATTAAACTTCCTCGCCAAAAAAAGATTTGCTTGTTTATGAAAGCATGTATCATTTAATCGATCGCGGTTTATTTAACATGTCAAATTGTAGTACTTTAAAGACAAAAGGAAGATTAATAGAAAAACAATTGTCAATAGGTGGCTGAATTTAACACTTGTACAACTTTTTCACTAACTTCAAATTTCAATCAG	CACUAAC	CACUAAC	18	6		NA	NA	NA	No	YES	No	No	No	NA	NA
III	592254	592352	99	1	SPCC1183.01	SPCC1183.01.1:exon:3-SPCC1183.01.1:exon:4	int_4491	16	11	5	0	0	10	1	2	A	AAAACUAACAA	13	16	dbr1_1;dbr1_2	42	20	1.55349	1.8453	43	10.5	5.55606	4.88969	GTGAGCAATTATATTAAGCGTGGCTCTTTCAACTTGAAGAAATTGAGCTTGATTAAATTCTTGAATTTTGATTACGCAGAAAACTAACAATTGTATCAG	AACUAAC	AACUAAC	13	16		NA	NA	NA	No	YES	No	No	No	NA	NA
II	1358926	1359482	557	1	SPBC8D2.01	SPBC8D2.01.1:exon:2-SPBC8D2.01.1:exon:3	int_2635	20	12	8	0	0	17	2	2	A;A	CAUACUAACCU;GCAUACUAACC	12;13	17;3	dbr1_1;dbr1_2	47	29	7.88331	7.69615	4.8	3.75	6.22963	6.04215	GTACGTTGTTGAGGTGTTTGCATGCGCGAAATCGCTGTAGGAAGGAGGCGGTGATTGAAATGAGGAAAGGAGCGTGCAAGAGTGGAGTTTTCATGTGTGGTTGAAAGAAATCTCTTTTGGCTGATCTGCTTTTAATGCCACCTTTCTTTGAAACAGCCGGTGATAAATATTTGTTGATACTAGCGTTGGTTTTCCTTTACACAAAAGAGAATTCTATCTATTTCACGTTGCATCGAGTGGTTTGCTTTTTGAGCTTTTGGGTTTACTTCTTTTTTACCTTTTATACTTCTTTCTGTACTTTTTATCTCTTCTTTTTGTTCCTTAGGTTGATTTGTATATGGAATCTTTTTTTTAATAAATCAATTTTGAAAGGGCAACGGATTATCCTTTTCCTATTGC…	UACUAAC	UACUAAC	12	17		NA	NA	NA	No	YES	No	No	No	NA	NA
I	1516664	1516788	125	-1	SPAC57A7.12	SPAC57A7.12.1:exon:2-SPAC57A7.12.1:exon:1	int_1477	18	9	9	0	0	16	2	2	A;A	GAAGCUAACAA;AGAAGCUAACA	13;14	15;3	dbr1_1;dbr1_2	145	79	5.17789	5.19337	48.6667	80	6.35424	6.14426	GTAAGAAAATTTTTTTACTTGGAGAAATGAGTAATCTCCTAGTTCATTCGCATAGACTTGCTTTATGCAGGCAGACGAGAATCCTTAGTAAATTTTCAAATTAAAGAAGCTAACAAATCAAACAG	AGCUAAC	AGCUAAC	13	15		NA	NA	NA	No	YES	No	No	No	NA	NA
III	442146	442213	68	1	SPCC4G3.15c	SPCC4G3.15c.1:exon:2-SPCC4G3.15c.1:exon:3	int_4461	4	3	0	0	1	3	2	2	A;A	GUUACUAACCU;GGUUACUAACC	11;12	3;1	dbr1_1;wt_2	49	38	5.12091	5.22369	1.28205	1.56	7.07004	7.01158	GTATGTTTTTCTAAGGCGTTGTTGAAACTTGAATTTCTAATTTGATTGTGGTTACTAACCTTTTTTAG	UACUAAC	UACUAAC	11	3		NA	NA	NA	No	YES	No	No	No	NA	NA
I	1892641	1892925	285	1	SPAPB1A10.15	SPAPB1A10.15.1:exon:1-SPAPB1A10.15.1:exon:2	int_400	15	8	7	0	0	12	2	2	A;A	CAAACUAACGA;UCAAACUAACG	15;16	14;1	dbr1_1;dbr1_2	4	4	6.58261	6.65969	2.5	1.66667	2.28802	3.1034	GTAAGTAATATACACACAATATGTTTCGTTGATGTAGTCAACTTGATCGTAAGGAGCTAAGGGCAAGTCCATTCCAACGGCGACGAAAAGAAGCTTCATGAATATTTTTCTCTTCAAATATAATTTACATTATTGTAAGCAAATGACGATCATTCAATTTTTGTCTCCATTTATCTTGCTTAATGAATACTGAGAGTGGAATGCGTAGTCTTGCTGTAATCGTTAAGATCGACTTGTTCTTTAGTTTTTTTTAAGTACAATTTCAAACTAACGACTATGTTACAG	AACUAAC	AACUAAC	15	14		NA	NA	NA	No	YES	No	No	No	NA	NA
II	3186757	3186875	119	1	SPBC776.07	SPBC776.07.1:exon:1-SPBC776.07.1:exon:2	int_3066	21	8	13	0	0	19	3	2	A;A;A	CAAUCUAACUA;UCAAUCUAACU;UUUUUUAACGU	10;11;24	19;1;1	dbr1_1;dbr1_2	82	78	5.81158	6.01089	11.8571	9.875	6.72467	6.71073	GTAAGCAATGCTGTTGAGGTCTTAGCATGTATCTGTCAAACATTTTAACTACAATGCGTTGTGGGCCTTCTAAATTCTAATTAAATTATTTTTTAACGTTTTCAATCTAACTACTTTAG	AUCUAAC	AUCUAAC	10	19	UUUUAAC	24	1	NA	No	YES	No	No	No	NA	NA
I	3805931	3806162	232	1	SPAC1556.07	SPAC1556.07.1:exon:1-SPAC1556.07.1:exon:2	int_792	1	0	1	0	0	1	1	1	A	AAGACUAACAU	11	1	dbr1_2	17	30	8.64356	8.67737	3.6	15.5	4.45795	4.94241	GTAAGTTTAGATTATTGCAGTCGAGCTTTCTTGGATTCAATCTGAATAGCCGGCTTGTATCAAATTTCCTATTTTCCAATCACATTCTCTATGGTCATCACCATTATTTAATCAGAGATGGCTTGAAAGGAAGTTTTAATTATCCAAAATATTTCGGGAGCAAGCTATTCATGCTCTATGACCTAGTTTATTTCTCTTTCCATTTTGTAATAACAAGACTAACATTTTAAAG	GACUAAC	GACUAAC	11	1		NA	NA	NA	No	YES	No	No	No	NA	NA
I	3686601	3686709	109	-1	SPAC15A10.05c	SPAC15A10.05c.1:exon:2-SPAC15A10.05c.1:exon:1	int_1984	14	7	7	0	0	8	2	2	A;A	UUAGCUAACAU;AUUAGCUAACA	10;11	12;2	dbr1_1;dbr1_2	0	0	5.50212	5.69353	0.5	0.5	2.8845	2.8495	GTAAGCAAGTATTACATCGGCTCTATTATAGACGCACTTCTAAAATTTACATCGTCAATTCCTTGACATCCTTGCCCATGTATTTACGGTAATTAGCTAACATCTGTAG	AGCUAAC	AGCUAAC	10	12		NA	NA	NA	No	YES	No	No	No	NA	NA
I	1050089	1050174	86	1	SPAC23C4.12	SPAC23C4.12.1:exon:2-SPAC23C4.12.1:exon:3	int_241	25	9	16	0	0	20	2	2	A;A	UUGACUAACUA;AUUGACUAACU	11;12	24;1	dbr1_1;dbr1_2	11	19	5.45701	5.6673	6	20	5.15641	4.86094	GTAAGTTTTGAAAAGAAAATGATAAGGTGATACGTTAGTTTAACCTTAACAAATGATTGAAAATTCGATTGACTAACTATTATTAG	GACUAAC	GACUAAC	11	24		NA	NA	NA	No	YES	No	No	No	NA	NA
I	709340	709427	88	-1	SPAC1296.01c	SPAC1296.01c.1:exon:5-SPAC1296.01c.1:exon:4	int_1265	27	13	14	0	0	15	2	2	A;A	AAGACUAACAU;CAAGACUAACA	15;16	23;4	dbr1_1;dbr1_2	176	113	4.50102	5.09051	10.4118	11.4	6.93221	6.72485	GTTTGTTTTACTTTTATTGTCGATATTAGATCACTTAATTTCTCCGCTTTTTTAAATCTTATGTCCAAGACTAACATCTAATACTTAG	AUCUAAU	GACUAAC	15	23		NA	NA	NA	No	No	No	No	No	NA	NA
I	3519140	3519226	87	-1	SPAC16E8.10c	SPAC16E8.10c.1:exon:2-SPAC16E8.10c.1:exon:1	int_1936	68	38	29	0	1	36	2	3	A;A	UUUGCUAAUAU;AUUUGCUAAUA	12;13	67;1	dbr1_1;dbr1_2;wt_2	16	19	4.95491	4.68379	1.88889	4	5.64833	5.55469	GTACGTCGAAATTATTGAAAATTTTGGAATTTTTTGTGAATTATTTCTTTTTATAGTGTGTAGACGGATTTGCTAATATTTTGATAG	UGCUAAU	UGCUAAU	12	67		NA	NA	NA	No	YES	No	No	No	NA	NA
II	3997676	3997818	143	1	SPBC3B9.05	SPBC3B9.05.1:exon:1-SPBC3B9.05.1:exon:2	int_3280	44	30	14	0	0	29	2	2	A;A	UUGACUAACAG;GUUGACUAACA	11;12	42;2	dbr1_1;dbr1_2	54	39	4.9705	4.96686	18.3333	13.3333	4.75881	4.6673	GTAAGTTATTGGATTACAATCCTAGTTTTTCAGCTTAAATTCTATCATTGCTAAGAAAAGGACCTTGTTAAAATGAATTTTCCAAAGCTATCTTTTTCAGGCGCTATTATTAAGTTTATTGTATGTTGACTAACAGTTTATAG	GACUAAC	GACUAAC	11	42		NA	NA	NA	No	YES	No	No	No	NA	NA
II	1690290	1690487	198	1	SPBC19C2.08	SPBC19C2.08.1:exon:1-SPBC19C2.08.1:exon:2	int_2715	20	11	9	0	0	14	4	2	A;A;A;A	CUGACUAAUAC;UUCACUGACUA;ACUGACUAAUA;GCAAAGAAACC	11;15;12;75	13;4;2;1	dbr1_1;dbr1_2	34	27	4.72341	4.87083	5.83333	14	4.5492	4.05472	GTATGTGTTCTTCATTGACAGAAAAGGAAAGTGTTTTTACATATTAGAGTTCAAGTACGATTACTTTCCAAATCGATATTTTGAGTGATATAGCCTAAATGAACTTGATTTGGCAAGCAAAGAAACCAAGTATAGGTACTTGCTGTTTTAATCAGTCCTCAAACTGTTATTCCAAATTCACTGACTAATACATCTTAG	GACUAAU	GACUAAU	11	13	CACUGAC	15	4	NA	No	YES	No	No	No	NA	NA
I	777732	777890	159	1	SPAC4G8.08	SPAC4G8.08.1:exon:2-SPAC4G8.08.1:exon:3	int_170	2	1	1	0	0	2	2	2	A;A	CUUUCUAACUU;UCUUUCUAACU	13;14	1;1	dbr1_2;dbr1_1	10	8	3.42016	3.39881	2.2	4.5	4.86196	4.81343	GTATGTGAATCTTTTTTATTTATTTATTAAATTTTCTTTAAATGAGAATCTAAACAATCTAAAGCTTTACGGCCTTTGGGGGAAATTAAAAAACAAAAATAGACTTAATCAAATTTTTGATTAATCTTTTGTTAATTCTCTTTCTAACTTAAATTATAG	UUCUAAC	UUCUAAC	13	1		NA	NA	NA	No	YES	No	No	No	NA	NA
II	3399756	3399863	108	-1	SPBC13A2.01c	SPBC13A2.01c.1:exon:2-SPBC13A2.01c.1:exon:1	int_4122	8	5	3	0	0	7	2	2	A;A	UGUACUAAUCA;UUGUACUAAUC	15;16	6;2	dbr1_1;dbr1_2	93	88	4.92438	5.58484	13.4286	8.9	6.17489	6.47465	GTAAGTTTTCATAAAATTCTGTTTATTTGCTCTTCAAGTTCATTACTTTCAAAGTTGTCTTGGAATGCAATCATAGATGCCCGACTTGTACTAATCAAATATTACCAG	UACUAAU	UACUAAU	15	6		NA	NA	NA	No	YES	No	No	No	NA	NA
III	815820	815969	150	-1	SPCC1393.09c	SPCC1393.09c.1:exon:4-SPCC1393.09c.1:exon:3	int_5057	7	4	3	0	0	5	1	2	A	AUAACUAAUCA	15	7	dbr1_1;dbr1_2	21	18	7.65248	7.83722	22	19	3.8258	3.46852	GTATGAACCAGTTAAGATACAATCGAAAAGGGAACAAGAATAGAAGTAGCTGAGGATTGCTTTTGTCCACTAGGAAAGCTCTTTCACTGTTTTATTAAGCATTGATGCATATTTATAATTTCCATCATATAACTAATCATTCATATATAG	AACUAAU	AACUAAU	15	7		NA	NA	NA	No	YES	No	No	No	NA	NA
I	1606804	1606974	171	-1	SPAC23H4.02	SPAC23H4.02.1:exon:2-SPAC23H4.02.1:exon:1	int_1500	35	17	17	1	0	25	3	3	A;A;A	AUGGCUAACAG;GAUGGCUAACA;CUUGUUAAUAA	9;10;120	30;4;1	dbr1_1;dbr1_2;wt_1	19	12	6.02909	6.14426	20	3.25	4.69005	4.42199	GTAAGTACATGAGGTGAAATTTAGTTGACTTTGTCTTGTAGGGGCTTGTTAATAAGATAGAGTAGACTACTTATAGACAGTAGAGATAGACTACTTAGGTGTCATGGTTATCTTGCGCATCGATCGTCTTTGATTTTGTTTTTGGCAATTGTACGATGGCTAACAGTGTAG	GGCUAAC	GGCUAAC	9	30	UGUUAAU	120	1	NA	No	YES	No	No	No	NA	NA
I	4972663	4972851	189	-1	SPAC1952.04c	SPAC1952.04c.1:exon:4-SPAC1952.04c.1:exon:3	int_2270	39	19	20	0	0	24	4	2	A;A;A;A	CUUGCUAACUC;ACUUGCUAACU;AGCACUCACUU;UGGGAUUAUUU	11;12;19;46	27;9;2;1	dbr1_1;dbr1_2	2	2	4.97311	5.39968	0.333333	0.75	3.88245	3.44912	GTAAGGGAATTCAAGAAAGCATATGTTATGTAGTTGACCCTTTCTACTTATCATTGTTTGGAAACCTGACAGACCTTGTTTGTTATTTTCTAAGCCATTCTTCAATCTTCAATGTTACATGCTTTCCAGGGAAAGTTGGGATTATTTTGCTGTCCAACTAATAAGCACTCACTTGCTAACTCAGAGCAG	UGCUAAC	UGCUAAC	11	27	CACUCAC	19	2	NA	No	YES	No	No	No	NA	NA
I	4548475	4548567	93	-1	SPAC637.05c	SPAC637.05c.1:exon:4-SPAC637.05c.1:exon:3	int_2176	25	10	15	0	0	19	3	2	A;A;A	UUUAUUAAUGC;AAUGCUAAUUA;CUUUAUUAAUG	14;8;15	13;10;2	dbr1_1;dbr1_2	92	38	3.83633	4.17253	18.6	7.8	7.43438	6.91523	GTAAGTGCCCTTGAGAAATTATATATCTTGGAAGATGTGTTTCTTAATGTCTTCTGTTTCTTATTTCGTTACTTTATTAATGCTAATTAATAG	UGCUAAU	UAUUAAU	14	13	UGCUAAU	8	10	NA	YES	No	No	No	No	NA	NA
II	1238916	1239004	89	-1	SPBC651.01c	SPBC651.01c.1:exon:3-SPBC651.01c.1:exon:2	int_3630	127	71	56	0	0	43	3	2	A;A;A	AUCUACUAACG;UCUACUAACGA;AUCAUCUACUA	14;13;17	101;21;5	dbr1_1;dbr1_2	165	93	6.92212	7.35144	6.38462	6.26667	7.79052	7.45738	GTATGTAAACATTTTCAGTTCAATTATCGTATTAGAGTGGTTGCATTGGAATTCTAGATTTGCGAATCATCTACTAACGAAAATATTAG	UACUAAC	CUACUAA	14	101	CAUCUAC	17	5	NA	No	No	No	No	No	YES	NA
II	4074119	4074237	119	1	SPBC1347.07	SPBC1347.07.1:exon:3-SPBC1347.07.1:exon:4	int_3300	67	42	25	0	0	46	2	2	A;A	CAUACUAACUA;UCAUACUAACU	12;13	58;9	dbr1_1;dbr1_2	9	3	5.24885	4.85994	2.5	2	3.70411	3.7646	GTAACTTTTAATTGTGAACATTGAAACATCGGCTTTTAACTTGAGATGTTTCAAGAGAAACAAATGCATGGTTTCGAAGTTGAGCGTTTATTAAGGCTGTCATACTAACTAAGGCGTAG	UACUAAC	UACUAAC	12	58		NA	NA	NA	No	YES	No	No	No	NA	NA
I	979022	979119	98	1	SPAC222.18	SPAC222.18.1:exon:1-SPAC222.18.1:exon:2	int_214	9	8	1	0	0	7	2	2	A;A	UGUUCUAAUUG;CUGUUCUAAUU	14;15	8;1	dbr1_1;dbr1_2	31	10	5.74946	5.02987	1.28	1.22222	4.58129	4.41576	GTAATTGTTATTGAATGACTGATTGTAGATTACAACTTTGGTTTTCAGTCAAGTGATCTCTATTTTTGTATCGCATCTGTTCTAATTGATGATAATAG	UUCUAAU	UUCUAAU	14	8		NA	NA	NA	No	YES	No	No	No	NA	NA
II	1142345	1142495	151	1	SPBC409.06	SPBC409.06.1:exon:1-SPBC409.06.1:exon:2	int_2572	31	13	18	0	0	20	2	2	A;A	CUUACUAACUG;UCUUACUAACU	20;21	25;6	dbr1_1;dbr1_2	63	33	7.55493	7.27752	21.3333	17	6.21844	5.91625	GTAAGTGATCATATTTTTGAAAGCATAGTCGTCTATGCTGGGGTTGAAAATTGTAGTGTTTTTTACTCGCGTTGTGATTTTCTATTGTTCTTTATTTATAGAACTTTTATGGATTGGAACTGGTCTTACTAACTGATTTCCTTGCAATTAG	AACUGAU	UACUAAC	20	25		NA	NA	NA	No	No	No	No	No	NA	NA
I	2105047	2105243	197	-1	SPAC631.01c	SPAC631.01c.1:exon:2-SPAC631.01c.1:exon:1	int_1613	24	15	9	0	0	18	3	2	A;A;A	UCAGCUAACUU;AUCAGCUAACU;CUAACUUAUUC	14;15;10	21;2;1	dbr1_1;dbr1_2	34	36	7.04805	6.96411	17.5	12.3333	6.54984	6.56958	GTAAGTATTACTGAAATTAATTACCTTGCCCAATTTTTTTGTTATATTTTTATTATATAGCCATCTGTAAATTCATCTTATCATTGAATGCATATTTCATCGATTTTCGTCAGTATTGCTCAGAGACTTTATGAATTTGCTTTTCACATTCTTTGTCGTTATCCTTCTTTACAATATCAGCTAACTTATTCTTTTAG	AGCUAAC	AGCUAAC	14	21	AACUUAU	10	1	NA	YES	YES	No	No	No	NA	NA
I	3463128	3463258	131	1	SPAC3A11.05c	SPAC3A11.05c.1:exon:1-SPAC3A11.05c.1:exon:2	int_713	22	14	8	0	0	16	2	2	A;A	ACUAUUAACAA;AACUAUUAACA	17;18	17;5	dbr1_1;dbr1_2	38	23	5.70838	5.87228	19.5	24	2.48386	2.11271	GTATGAAAAAAATTGATTGCTTATGCAGGTAGATCTTGTTTATTGAGTCAGAGACAAACTCTCAAGACTCTGGTTTTTCTCGCTTTACCCAATTACCAATAGGATAAACTATTAACAAAAAATTTTCTTAG	UAUUAAC	UAUUAAC	17	17		NA	NA	NA	No	YES	No	No	No	NA	NA
I	482186	482285	100	-1	SPAC24H6.05	SPAC24H6.05.1:five_prime_UTR:2-SPAC24H6.05.1:exon:1	int_1215	17	8	9	0	0	14	3	2	A;A;A	AGUACUAACUG;AAGUACUAACU;CUUCUCAAGUA	13;14;20	9;7;1	dbr1_1;dbr1_2	3	1	6.82966	7.44971	2	0.4	-0.121686	0.170125	GTAAGTTTAAAAAGAACTTGATGCCTGTTAGTTTCGGGCATCCTTCTCTCCTCAAGTTGGATTCCTGTTGATGCTTCTCAAGTACTAACTGCTGGTTCAG	UACUAAC	UACUAAC	13	9	UCUCAAG	20	1	NA	No	YES	No	No	No	NA	YES
II	3955745	3955859	115	-1	SPBC26H8.05c	SPBC26H8.05c.1:exon:2-SPBC26H8.05c.1:exon:1	int_4241	4	4	0	0	0	4	1	1	A	GGGUCUAACGU	14	4	dbr1_1	12	14	4.57439	4.95109	4.33333	7.5	3.82189	3.99745	GTATGTATAATAGTATTTATAGAATAACTTTTATCTCCGTCGATATAACAACGATCATTCATATTGGTTGTTCTTTGCCATAATTATAAGAATGGGGTCTAACGTTTTGTGGTAG	GUCUAAC	GUCUAAC	14	4		NA	NA	NA	No	YES	No	No	No	NA	NA
I	990601	990711	111	1	SPAC821.06	SPAC821.06.1:exon:3-SPAC821.06.1:exon:4	int_220	9	4	5	0	0	7	1	2	A	AUUGCUAACCA	9	9	dbr1_1;dbr1_2	50	55	3.71035	4.23044	51	56	6.28907	6.39754	GTATGTTGATTTTTTTATAGTTAGGTTTTCATCTTTGATTGAACTCATTGAGCTGGCTTCAATGAGTCAGCAATCCTTATATTTATTATGGTTACATTGCTAACCACATAG	UGCUAAC	UGCUAAC	9	9		NA	NA	NA	No	YES	No	No	No	NA	NA
I	2795046	2795289	244	1	SPAC1805.13	SPAC1805.13.1:exon:1-SPAC1805.13.1:exon:2	int_604	12	4	8	0	0	10	1	2	A	CAUACUGACAU	10	12	dbr1_1;dbr1_2	12257	8429	9.43804	9.34482	1225.8	602.143	12.9907	12.8168	GTAAGTTTGATTAAGCTGGTTAACTTTTCAAGAGCGTGAAAATTGCTTGTAGACAGGGATATGAGATTTAAATTCTTTTTTCATGTTATTTAAAGTAGCTTATACGCATGATCAAATGTTTTATAGAGAAAATTTTTTTATTTTTCATTACACTTAAAAATTTTATGGCTTGCTTTTTTCTCCTCCTTTTCTTTACTTCATATGTTACCAGCAAATGTAGAAACAGTCATACTGACATTTTTAG	UACUGAC	UACUGAC	10	12		NA	NA	NA	No	YES	No	No	No	NA	NA
I	4710039	4710138	100	1	SPAC1834.08	SPAC1834.08.1:exon:1-SPAC1834.08.1:exon:2	int_966	8	6	2	0	0	8	2	2	A;A	AUUACUAACGU;AAUUACUAACG	13;14	7;1	dbr1_1;dbr1_2	25	10	3.43207	3.02344	13	2.75	3.93557	3.46936	GTAAGTGATTTCAATACTTGGATTCTCCTTTTTTAAATATGAAATAAAATGTGATATCTCTTGTTACTTAATTAATTTAAATTACTAACGTTTGAATAAG	UACUAAC	UACUAAC	13	7		NA	NA	NA	No	YES	No	No	No	NA	NA
II	1193657	1193875	219	-1	SPBC4.04c	SPBC4.04c.1:exon:2-SPBC4.04c.1:exon:1	int_3625	7	2	5	0	0	6	1	2	A	UUUUCUAACUG	9	7	dbr1_1;dbr1_2	93	79	6.46488	6.57199	9.4	8	6.1454	6.13508	GTAAGTTTTATAGCTATGCTTGAGACGTGTCTTGTCAATGTTGTGTATACTAAGTGTTGCCATCAATATATAAATTACATACTATTTCTTCTCCTTCTTGTAAATAAATATATTTATTGGATTCCTAGGTTGCGGTTATATTGACAGAACAAATCTTGATTTTCAAAAGAGTAGTTTCACATTTCGCGTCAAATAAGGTACTTTTTTCTAACTGTATAG	UUCUAAC	UUCUAAC	9	7		NA	NA	NA	No	YES	No	No	No	NA	NA
II	3083649	3083741	93	1	SPBC30D10.09c	SPBC30D10.09c.1:exon:2-SPBC30D10.09c.1:exon:3	int_3034	19	7	12	0	0	12	2	2	A;A	AGUUAUAACAU;UAGUUAUAACA	12;13	15;4	dbr1_1;dbr1_2	41	46	4.35989	4.96103	21	15.6667	4.30273	4.437	GTAGGTTTATTTTTCCGCCGAAGTAAAAAGCATATTCGTTGGTTTTACCATGAGTCGGATTTTTTATGAACATTAGTTATAACATTTGTACAG	UUAUAAC	UUAUAAC	12	15		NA	NA	NA	No	YES	No	No	YES	YES	NA
II	209826	209921	96	1	SPBC660.08	SPBC660.08.1:exon:1-SPBC660.08.1:exon:2	int_2379	22	16	6	0	0	17	2	2	A;A	AAUGUUAACAA;GAAUGUUAACA	10;11	19;3	dbr1_1;dbr1_2	18	15	5.6485	5.79658	6.33333	8	3.63852	3.70794	GTAAGAGATGCTTAAAGAGATAAGGATATGAGTAAATTTAGTGTTTGAAGTTCGTAATTATCGTTCGCTTTTGAATGTGAATGTTAACAAAATTAG	UGUUAAC	UGUUAAC	10	19		NA	NA	NA	No	YES	No	No	No	NA	NA
I	715722	715993	272	1	SPAC1296.04	SPAC1296.04.1:exon:2-SPAC1296.04.1:exon:3	int_141	25	11	14	0	0	20	2	2	A;A	UUUGCUAACAA;GUUUGCUAACA	189;190	22;3	dbr1_1;dbr1_2	3	10	3.24222	3.72958	4	3.66667	3.64886	3.67764	GTATGTCAATAACTTCTTCTCTGTCTTCCTCTAGGACGATAGCGATAAGACCAGCATATAGTTTGCTTGAAAACTGTTTGCTAACAATATACTGCTTTTGTTGTAACATTTTCCTCTCTGAATTTAAGAAAGCTATTTGTTTTACACCAATGAAATTAGCTGTAGTTGAACCATCCTTTGGCTCAATTATTTAAGTTTCATTTGGTTCTTTGCTTTTGGTTAGCTAAATTTGTGAATGGATGTGTTACCAAAAAAGCAGTTTAAATGTATAG	UGCUAAC	UGCUAAC	189	22		NA	NA	NA	No	YES	No	No	No	NA	NA
I	4993935	4994045	111	-1	SPAC1952.14c	SPAC1952.14c.1:exon:2-SPAC1952.14c.1:exon:1	int_2275	42	23	19	0	0	35	2	2	A;A	UUUAUUAACAC;CUUUAUUAACA	13;14	35;7	dbr1_1;dbr1_2	7	6	4.829	4.33231	1.6	2.33333	5.94459	5.94358	GTATGTAAACTGTTGTACTTTCATGATTTTCTTATTTCTATCTACTGATTTTGATTGTGAAAAATTTACTATTATTATTTTTTTAATTGTCTTTATTAACACTCTTTTTAG	UACUGAU	UAUUAAC	13	35		NA	NA	NA	No	No	No	No	No	NA	NA
II	632434	632615	182	-1	SPBC839.17c	SPBC839.17c.1:exon:2-SPBC839.17c.1:exon:1	int_3504	7	4	3	0	0	5	2	2	A;A	AAUUCUAACCU;AAAUUCUAACC	13;14	6;1	dbr1_1;dbr1_2	97	105	7.44134	7.53237	4.66667	8.83333	8.61487	8.70309	GTAAGTGTTGAAAAAATCGGTAATTTCTTTTGAATCTACAAATATCTTCTCTGGTTATGTTTGTAAACAATTCATCCGTGTTAGTCGGTTCACCACTGATTTGCATTTCCTTAATTTGTCACATTCCTGATGTCCTTGTCTCTACATTATTCCTTTCATACAAATTCTAACCTTTAAAAAAG	UUCUAAC	UUCUAAC	13	6		NA	NA	NA	No	YES	No	No	No	NA	NA
II	969872	969963	92	-1	SPBP35G2.04c	SPBP35G2.04c.1:exon:2-SPBP35G2.04c.1:exon:1	int_3565	11	6	5	0	0	7	2	2	A;A	CUUACUAACUU;UUUACUUACUA	10;14	10;1	dbr1_1;dbr1_2	2	3	2.65928	3.2312	3	4	3.88663	3.7698	GTGTGTGTAATTATAAGAATTTCTGTGTTTGTCGCCTGAAGTTTTAAAATTTAAAGTGAATGATTTATGAGTTTACTTACTAACTTTATTAG	UACUAAC	UACUAAC	10	10	UACUUAC	14	1	NA	No	YES	No	No	No	NA	NA
II	1510731	1510880	150	1	SPBC83.01	SPBC83.01.1:exon:1-SPBC83.01.1:exon:2	int_2683	15	9	6	0	0	10	2	2	A;A	AUAUCUAACUG;UAUAUCUAACU	16;17	13;2	dbr1_1;dbr1_2	12	5	5.57293	5.81352	6.5	6	5.69688	5.37245	GTATGTTTAATTCATTCCTCAATCAAAAGCTTTGGGATAGCAGTTTTTATCTCTTAAAGTTTAGAGTTTAAATCTAAGAGTGGAATGTTATAAATTAAAGCGTTGCACTTTCTAAAAGAAAAAATATATATCTAACTGCCAATTTATTAG	AUCUAAC	AUCUAAC	16	13		NA	NA	NA	No	YES	No	No	No	NA	NA
I	4057016	4057303	288	1	SPAC19G12.08	SPAC19G12.08.1:exon:1-SPAC19G12.08.1:exon:2	int_846	89	47	42	0	0	41	2	2	A;A	UAUACUAACAU;UUAUACUAACA	12;13	84;5	dbr1_1;dbr1_2	148	117	9.75799	9.86724	49.6667	23.6	6.62546	6.38858	GTAAGTATTTAAACAAGGAGAAATGGCAGGGTGTTTGGGTTTTGAGAAGGAGATTTGGTTGAAGGACTAAAATTTTTTCTCGGCAACAGAGTGTTTGAGAGGCAATGTATAAAAAACAATGAAAACGCATATAGCAAAGGCTTATTGGCAAAAGATCCATTGTGGGAGATGTGCCATTTCTTATCTTTTTTCTTTGTTCGTTGTGCTTTTAACTTTTTTTCACCTTTCCCCCTTTGCCTTAGTTACACCAAAATACATGTATCGTTCTTTATACTAACATTCCATTAG	UACUAAC	UACUAAC	12	84		NA	NA	NA	No	YES	No	No	No	NA	NA
I	3166759	3166864	106	1	SPAC3G9.09c	SPAC3G9.09c.1:exon:2-SPAC3G9.09c.1:exon:3	int_665	22	16	6	0	0	17	2	2	A;A	UGUACUAACCA;AUGUACUAACC	12;13	18;4	dbr1_1;dbr1_2	245	210	6.66437	6.89938	246	105.5	7.9263	8.00433	GTAAGAATTTATTAGTAGTTTTTTTTTTTTTTTTTTTTAAAAAAAAGAAAAACAAAAGGGGAAAAAAGGTTTATAAGTTGTTAGGAATGTACTAACCAGGATTAAG	UACUAAC	UACUAAC	12	18		NA	NA	NA	No	YES	No	No	No	NA	NA
I	3974776	3974878	103	1	SPAPB18E9.01	SPAPB18E9.01.1:exon:3-SPAPB18E9.01.1:exon:4	int_834	91	61	30	0	0	37	2	2	A;A	UCUACUAACAA;UUCUACUAACA	15;16	89;2	dbr1_1;dbr1_2	77	48	5.5838	5.39019	13	24.5	5.71429	5.70912	GTAGGATTATTTGAATCGTAAATTGCAATAAACACATATAGCGTCGTCGTCTCTTCTTTTCGAGATTTATTTGTTGTAGCTTCTACTAACAACTTTTACTTAG	UACUAAC	UACUAAC	15	89		NA	NA	NA	No	YES	No	No	No	NA	NA
I	4927599	4927819	221	-1	SPAC1B3.01c	SPAC1B3.01c.1:exon:2-SPAC1B3.01c.1:exon:1	int_2261	18	11	7	0	0	14	3	2	A;A;A	CCUGCUAACAU;CCCUGCUAACA;CCAAGAAAUUU	13;14;140	15;2;1	dbr1_1;dbr1_2	46	37	6.57058	6.49778	9.4	6.33333	5.71395	5.51625	GTATGCGCGTTCAGTTTACAACAGATTACTGAGTCAAGGTCTAAGAACTAATTGAAATGAATGTGTTAATATGTCCAAGAAATTTTAGCTTTTTCCTCTATTAATGGGGAGATAAATGTTTATCAGTGGATGATAGGAAGCATTCATTATCAGTTAGTACATTCGACAACTTCTCGTGTATTCTTTGTTGAATCTGTTATCCCTGCTAACATGATATTTAG	UGCUAAC	UGCUAAC	13	15	AAGAAAU	140	1	NA	No	YES	No	No	No	NA	NA
I	2521918	2522033	116	1	SPAC23H3.14	SPAC23H3.14.1:exon:2-SPAC23H3.14.1:exon:3	int_540	26	15	11	0	0	18	1	2	A	UUGGCUAAUGC	12	26	dbr1_1;dbr1_2	14	5	4.16136	4.01877	2.14286	1.5	3.46528	2.89912	GTATGTATATCTCATTAATTTAAAACGTACAGTGAAAATGGATGGATCAGTTTACAACCCGTTCTCTCCATTTTTTTCTCGAAAAATTGATAAATAATTGGCTAATGCAATTCCAG	GGCUAAU	GGCUAAU	12	26		NA	NA	NA	No	YES	No	No	No	NA	NA
I	903469	903545	77	1	SPAC1687.01	SPAC1687.01.1:exon:3-SPAC1687.01.1:exon:4	int_192	13	3	9	1	0	9	2	3	A;A	UCAACUAACGA;CUCAACUAACG	11;12	10;3	dbr1_1;dbr1_2;wt_1	52	29	4.99134	4.82678	13.25	10	5.60055	5.89237	GTAAGTGATTGAATGAAATATTAACTTATAGATTTGATTAATAATATTTTGGGACAAACTCAACTAACGAATTCAAG	AACUAAC	AACUAAC	11	10		NA	NA	NA	No	YES	No	No	No	NA	NA
II	2685887	2686005	119	1	SPBC3E7.14	SPBC3E7.14.1:exon:1-SPBC3E7.14.1:exon:2	int_2938	2	2	0	0	0	2	2	1	A;A	UAUACUAACGU;UUAUACUAACG	15;16	1;1	dbr1_1	110	89	4.00423	3.90176	37	45	5.40167	5.42003	GTTAGTAAATTTTAAATGTTAGAATTCAAATTTTTATCGTGAATTAAATAGCACATGATAATTCAATTTCGAAACACATGTTAGTTTGTTTTTGTCTTATACTAACGTGATTTTAATAG	UACUAAC	UACUAAC	15	1		NA	NA	NA	No	YES	No	No	No	NA	NA
II	3773679	3773794	116	1	SPBC31F10.12	SPBC31F10.12.1:exon:3-SPBC31F10.12.1:exon:4	int_3247	100	55	44	0	1	34	2	3	A;A	UAUACUAAUAC;AUAUACUAAUA	10;11	90;10	dbr1_1;dbr1_2;wt_2	22	33	7.02133	7.18436	2.3	3.09091	6.75513	6.74608	GTGAGTATAAGCTAACGTAACCGCAACGTTTGATTGGAGTTCTGGTTTTTGTCTAGCTGGTCAGAATCGACAACAACATATCTGTGTTTAGTTCAAATATATACTAATACGCCTAG	UACUAAU	UACUAAU	10	90		NA	NA	NA	No	YES	No	No	No	NA	NA
II	3301329	3301429	101	1	SPBC20F10.09	SPBC20F10.09.1:exon:1-SPBC20F10.09.1:exon:2	int_3113	12	6	6	0	0	10	2	2	A;A	UCAUGCUAACA;CAUGCUAACAA	9;8	9;3	dbr1_1;dbr1_2	36	23	3.41771	3.33102	18.5	24	5.03035	4.81315	GTATGTAGATTTATTAGTACATTCTAAATTAGTTTCATAATAAGAAAAGGGAAAAATTATTGATTTATGCCCTGGGTAAATCTGTTCATGCTAACAAGCAG	UGCUAAC	UGCUAAC	8	3		NA	NA	NA	No	YES	No	No	No	NA	NA
I	4870654	4870822	169	1	SPAC4F10.18	SPAC4F10.18.1:exon:2-SPAC4F10.18.1:exon:3	int_1003	86	45	40	0	1	61	6	3	A;A;A;A;A;A	AUGAUUAACCU;UAAACUAAUGA;AGUGCUAAUGA;AAUGAUUAACC;UUAAACUAAUG;UCCUCUAAACG	11;18;65;12;19;32	49;29;3;2;2;1	dbr1_1;dbr1_2;wt_2	6	2	5.67505	5.88847	1.75	0.333333	4.53496	4.79283	GTATGTAAGATATCTGAATGTTACGACGAATGGTAATTTACGTATTACTCATTTCTTCTTTTCTGTTTTCCTAAGTTACAATATTTGAGAAAACCTCAGTGCTAATGAAACAATTATCTTCAAATAGCATTCCTCTAAACGTTTTAAACTAATGATTAACCTTATACAG	AACUAAU	GAUUAAC	11	49	AACUAAU	18	29	NA	No	No	No	No	No	NA	NA
I	3241754	3242151	398	-1	SPAC6G9.01c	SPAC6G9.01c.1:exon:2-SPAC6G9.01c.1:exon:1	int_1872	12	8	4	0	0	11	2	2	A;A	UGUAUUAACGU;UUGUAUUAACG	16;17	11;1	dbr1_1;dbr1_2	30	35	7.0709	7.17661	31	36	5.03153	5.35987	GTAAGACACTTTTTGCCGTTTGATAGTTCATCCTTACATACGTTCTCGCTACTTGGTTAATGATTGCATTCGTTCATGTTTGGCATCCGCGTTGTTTGTCAATTCTTTGACCTCAAATTCATATTTATTGTCTAAAAGATTGAGAAACTTCGAACTGTGCTATATACTTATTTATTTATTATATACTGCTAGAGCTAGATTACGTTTTTCTAGGGAGATACATTTCACAATGATGTTTAGTGTTGGTGGAGACTCCAAATCATTAAGCTCTATTGTGTGGTATTGAACCTTATTCGCTATTCTGTTTACGGGAATGTTTGCCGAACGATGCAATACTTACCTAGCAACGGCACTTTTCTCCTTATCATCAGTAATTGTATTAACGTTTTGTGTTTTAG	UAUUAAC	UAUUAAC	16	11		NA	NA	NA	No	YES	No	No	No	NA	NA
II	2672036	2672173	138	-1	SPBC3E7.07c	SPBC3E7.07c.1:exon:6-SPBC3E7.07c.1:exon:5	int_3918	19	15	4	0	0	17	3	2	A;A;A	UUAGCUAACAA;UUUAGCUAACA;UAUUUUAAUGU	11;12;32	12;6;1	dbr1_1;dbr1_2	43	15	4.24424	4.20263	22	8	4.86921	4.13319	GTATGTACTAGGAATCAAATTTAATGGTCTAAGAAACATGGCCATTTTTTAAGTGCCATTTTTTTAAAAAAAATCGTTTATGCGATCCATGAATTTCCATATTTTAATGTTCTATTTTATTTAGCTAACAAGTCTTAG	AGCUAAC	AGCUAAC	11	12	UUUUAAU	32	1	NA	No	YES	No	No	No	NA	NA
II	525526	525613	88	-1	SPBC1685.12c	SPBC1685.12c.1:five_prime_UTR:2-SPBC1685.12c.1:exon:1	int_3473	3	1	2	0	0	3	2	2	A;A	ACAACUGAUUU;AAAGACAACUG	13;17	2;1	dbr1_1;dbr1_2	0	0	0.916061	0.207879	1	1	-16.6096	-16.6096	GTAAGCAACAGCAACAGCAGCAAAGAGTAAAAATCAACAAAGGAAATTTACTTTGGAGAGAGAAAAAGACAACTGATTTTAAGTATAG	AACUGAU	AACUGAU	13	2	AGACAAC	17	1	NA	No	YES	No	No	No	NA	NA
I	3666037	3666133	97	1	SPAC8C9.14	SPAC8C9.14.1:exon:1-SPAC8C9.14.1:exon:2	int_754	6	6	0	0	0	6	1	1	A	CAUACUAACGU	15	6	dbr1_1	17	19	4.0235	4.65235	9	10	4.11014	3.94944	GTATGTTGGTTCCTTTTTCCGATGAATTTTTTATAATTATAAAATTTCACGTTTCGTGATAAAACTATGTTTTCTCATACTAACGTTGTTGAATTAG	UACUAAC	UACUAAC	15	6		NA	NA	NA	No	YES	No	No	No	NA	NA
I	5367697	5367820	124	1	SPAC4D7.09	SPAC4D7.09.1:exon:1-SPAC4D7.09.1:exon:2	int_1114	22	14	8	0	0	17	2	2	A;A	AAUACUAACCA;AAAUACUAACC	12;13	21;1	dbr1_1;dbr1_2	18	28	5.25418	5.87297	2.11111	3.625	6.06634	6.07482	GTAAAACAAACAAGTGTAGTACTGACTACTTAACGATTTGGATAATGATGACTTCGCACATATTATCTTCATCAACACTTAAAAAAGATAAAATAACAATAAGAAAATACTAACCATGTTTTAG	UACUAAC	UACUAAC	12	21		NA	NA	NA	No	YES	No	No	No	NA	NA
III	384691	384820	130	1	SPCC1682.07	SPCC1682.07.1:exon:1-SPCC1682.07.1:exon:2	int_4452	9	7	2	0	0	7	2	2	A;A	UAUACUAACUU;GUAUACUAACU	19;20	8;1	dbr1_1;dbr1_2	12	27	5.37548	5.27429	13	14	4.52527	4.94594	GTATGGCGTATCAAAATTGGTTTTCTTATGTTCTTCATTTGTTTGTTAGTTGCCTATGTTGGGCATTTGGAAACATATTAGTCTTTTATAGCATCGATGAACGGTATACTAACTTGTCAATCTGATTTAG	AUCUGAU	UACUAAC	19	8		NA	NA	NA	No	No	No	No	No	NA	NA
III	110172	110310	139	-1	SPCC330.03c	SPCC330.03c.1:exon:2-SPCC330.03c.1:exon:1	int_4879	29	20	9	0	0	23	2	2	A;A	GUUACUAACAC;UGUUACUAACA	15;16	26;3	dbr1_1;dbr1_2	17	17	8.11918	8.17407	4.5	18	6.22168	6.11043	GTATGAAAAAGTTAAATTTCTGCGCATGGATAATGTTTTGCCTACTCTAAGAAATTTCAATGCTAATTGTATTGAAATGAGATTGATTTGGTCGAAATTTTATTGTTGTTCTATTGTGTTACTAACACCGATGCTTTAG	UACUAAC	UACUAAC	15	26		NA	NA	NA	No	YES	No	No	No	NA	NA
I	5384084	5384206	123	-1	SPAC3G6.03c	SPAC3G6.03c.1:exon:4-SPAC3G6.03c.1:exon:3	int_2351	23	16	7	0	0	19	1	2	A	UUUGCUGACUA	11	23	dbr1_1;dbr1_2	6	7	5.90058	5.54496	1.4	4	3.60681	3.61406	GTATGTTTTTGGCTGTTTTTAGGGTGATGGAAGTGCCTGAACCGTGCGTGCTTTCAAATAATGAATTATAGCATTTTTTGTTTTTTTTAAATTTTTACGCATGACTTTGCTGACTAAGTTTAG	UGCUGAC	UGCUGAC	11	23		NA	NA	NA	No	YES	No	No	No	NA	NA
I	5133445	5133929	485	1	SPAC29A4.08c	SPAC29A4.08c.1:exon:2-SPAC29A4.08c.1:exon:3	int_1069	12	5	7	0	0	11	3	2	A;A;A	AUUGCUAACCU;AAUUGCUAACC;UGUAUUAAUAC	12;13;122	9;2;1	dbr1_1;dbr1_2	94	74	8.21312	7.99753	31.6667	75	6.21583	6.17222	GTAAGATTTCCTTCTTTATTATTGAATGGTTAAGAATTTCAAGTAGCACTTATTTTTTTATACGTGGAGTACTGAATATTCTGAAATTGGTTTGGAAAGTAAAACCCTGCAATATTGGTTGAAGAACTCGTTTATTTTCTTTTTTTTGTTGATAATGTATTTTATTGCATGATTGATTTGTACTCGAAATTTTTTAATTTTACAGCTTTATATTTCTCCTTAAAAAGTGGACTATTTAGTGCATGTCAATATCTCGGGGCAGAAATTAGGAAGGTTTTTAGAGAATTATAGAACAACCTTGTCGGATTTATCAAAACAAATCTTTATCAAAATTAATGTGGAGTTGTTGAGGAAAATGTATTAATACTTTAGATTTTTTTTGGTTTTTGCTCTCCAATG…	UGCUAAC	UGCUAAC	12	9	UAUUAAU	122	1	NA	No	YES	No	No	No	NA	NA
III	1306975	1307128	154	1	SPCC1322.09	SPCC1322.09.1:exon:2-SPCC1322.09.1:exon:3	int_4637	22	11	11	0	0	15	1	2	A	UUUACUGACAU	12	22	dbr1_1;dbr1_2	114	63	7.48156	7.27396	11.5	5.81818	6.15846	6.16076	GTAAGTTGCGTATTTACGTTTACGCTTTGGACATAGCACTAATATTTGTGCTTTCTTTTATGCTGTCACCGATTACTTGGTTTTCAAAAGACAGATAGGTCAATGCATAATCATAATTAAGTTTTATGGGATAATTTTACTGACATGTTACCAG	UACUGAC	UACUGAC	12	22		NA	NA	NA	No	YES	No	No	No	NA	NA
II	1910242	1910316	75	1	SPBP16F5.07	SPBP16F5.07.1:exon:1-SPBP16F5.07.1:exon:2	int_2765	18	8	10	0	0	12	2	2	A;A	GUUACUAACAG;GGUUACUAACA	15;16	16;2	dbr1_1;dbr1_2	5	6	3.90155	4.39268	1	0.538462	4.77824	4.45708	GTAGGCAATTTTGAAATCTGAATGAAAATCAGATTGTCGCAATTCGTCGACAGGTTACTAACAGAAAACAATTAG	UACUAAC	UACUAAC	15	16		NA	NA	NA	No	YES	No	No	No	NA	NA
I	3388780	3388912	133	1	SPAC959.02	SPAC959.02.1:exon:3-SPAC959.02.1:exon:4	int_703	56	29	27	0	0	27	3	2	A;A;A	ACAACUAACUU;UACAACUAACU;AUCUUUUACAA	9;10;16	54;1;1	dbr1_1;dbr1_2	36	11	5.40767	6.3802	18.5	12	6.39902	6.50683	GTATGTAGTTTACCTTTTTTTCGTATACAGCTGACGACCTAAACAAAGTGACAGATTCACTTTATTTGACTCGTCTAAATTTTATTATTATTATTTTTTTCTAATTAATTATCTTTTACAACTAACTTGTCAG	AACUAAC	AACUAAC	9	54	CUUUUAC	16	1	NA	No	YES	No	No	No	NA	NA
II	419310	419410	101	1	SPBC106.20	SPBC106.20.1:exon:5-SPBC106.20.1:exon:6	int_2417	40	22	18	0	0	27	2	2	A;A	UUUGCUUACUC;CUUACUCAUUA	13;9	39;1	dbr1_1;dbr1_2	2	4	3.47216	4.59405	0.428571	1.66667	1.16604	2.45785	GTATGTGTATTGAGGATTTGTCGATATTCATTTGCTAGTTTATCGATGTGTATATACATTTAAGTTGTTATCGTTTTTCATTTTGCTTACTCATTACGTAG	UGCUUAC	UGCUUAC	13	39	UACUCAU	9	1	NA	YES	YES	No	No	No	NA	NA
I	4767142	4767330	189	1	SPAC1782.07	SPAC1782.07.1:exon:1-SPAC1782.07.1:exon:2	int_982	24	13	10	0	1	23	3	3	A;A;A	UAUACUAACAC;UUUAUUUAUAC;UUAUACUAACA	12;18;13	11;11;2	dbr1_1;dbr1_2;wt_2	0	0	8.20878	8.34227	1	1	1.3166	2.34537	GTAAGTGCAACTTAAAGCAGTTTCTGTTTATAATGGGTTATATGACTTTTCTTTGACGCTTATAGCGTGAGACGGTGGACACAATTGGTGTTTATTTCGTAAAGCCATTTTCGTCAGCGAAGTTATATACATTCAAATAGCTGCTGAGAATATCATTGAACGTTTTTATTTATACTAACACATGAATAG	UACUAAC	UACUAAC	12	11	UAUUUAU	18	11	NA	No	YES	No	No	No	NA	NA
I	1916156	1916318	163	1	SPAC110.03	SPAC110.03.1:exon:1-SPAC110.03.1:exon:2	int_406	22	13	9	0	0	19	2	2	A;A	CAUACUGACCG;UACACAUACUG	15;19	21;1	dbr1_1;dbr1_2	116	105	6.5775	7.04649	10.6364	13.25	6.94623	7.24754	GTGAGTTGATGTTTACGGAAGGTGAAGTTAAGCAATGCATAAAAAAATACAAGAATTGCTATCATCTAAAATGAAGTTTCTTTTGTCTATACATTCCCCTTTATTTCTTTCTTTCCAAAAATTGTTCTTTTGAGTTTTACACATACTGACCGTTTGAATGTAG	UACUGAC	UACUGAC	15	21	CACAUAC	19	1	NA	No	YES	No	No	No	NA	NA
III	194604	194693	90	1	SPCC1235.09	SPCC1235.09.1:exon:1-SPCC1235.09.1:exon:2	int_4401	25	17	8	0	0	16	1	2	A	UUCGUUAACAU	24	25	dbr1_1;dbr1_2	10	12	2.88363	3.08234	5.5	3.25	4.77809	4.82548	GTATGTTAAATAGTTGGTTTTTGTGAATCATAGTCGCTTCATCTCTCCTTTTTTTCGGTTTCGTTAACATTATCGTGTTTTTTGTTGTAG	CGUUAAC	CGUUAAC	24	25		NA	NA	NA	No	YES	No	No	No	NA	NA
III	2131781	2132308	528	1	SPCC126.09	SPCC126.09.1:exon:1-SPCC126.09.1:exon:2	int_4796	20	10	10	0	0	14	2	2	A;A	UUUACUAACUA;UUUUACUAACU	17;18	15;5	dbr1_1;dbr1_2	15	17	8.35068	8.23899	1.6	2.25	4.75881	5.2312	GTAAGTAATCTGTTTTTTATGTTTTCTTTTTTTCTTTTAAGATCATTTGTTTTTCTTGTCTTGATTGTTGGAGATCTGATGAATTGGTAATAAATCGGAAAATGGATCTTCGTCACGGAAATCCATTCTTGATGTTCGGAATTTGCTTTATCGATTTGTTGAAATCTTGACTGTCAGATAAAAAATTCAAATTGAATTTAGTGGACGTACTTGTTGGTTATCTTTTCATGTTTGGCTATGGATGAAAATCGTATATCATGTCAAGGCTTTTGTTATACCGTTCTGCTTGCGATATTTGGAAATGGATTTATATCTTTGATTTTCAATTCAATATTCCATTGTCTTCATTTAGTGTATTCTGCTTGACAGTTATTAAAACCTCAAAAACAAATGCGGTTC…	UACUAAC	UACUAAC	17	15		NA	NA	NA	No	YES	No	No	No	NA	NA
I	3923886	3923994	109	-1	SPAC2F3.17c	SPAC2F3.17c.1:exon:2-SPAC2F3.17c.1:exon:1	int_2048	40	12	28	0	0	24	3	2	A;A;A	AAUACUAAACC;UAAUACUAAAC;AUACUAAACCU	14;15;13	29;10;1	dbr1_1;dbr1_2	16	18	6.19976	5.98658	3.4	2.11111	7.00203	7.17426	GTATTTAACATGAATTGCGTCGGAGACAATGCAAGTTTGCAATTTGTTTCTATCGCTTTAACTTTTTTTCCGTTATTTAGGGTTTGTTAATACTAAACCTGTTTTTTAG	UGUUAAU	UACUAAA	14	29		NA	NA	NA	No	No	No	No	No	YES	NA
II	4376093	4376294	202	1	SPBC1539.08	SPBC1539.08.1:exon:2-SPBC1539.08.1:exon:3	int_3358	6	4	2	0	0	5	1	2	A	UUAACUAACAG	8	6	dbr1_1;dbr1_2	15	9	6.67728	7.00909	1.77778	1.66667	4.32818	3.88303	GTAAAGAGCACTAAACAGCATTCTTCGATTGTGTCAAGGTATCGTATGCGCTGCTTCTGTATTAGCATAGTAGATATAGATTTCATTACGAAGACTGTTGGTTAATTAATCAGTGAAGTCTACTGTCGCGCATTATCTTGAGTTGCAATTATGCTTCCGTAAATGAAATTGATTTTTCTTGTGTTCATTAACTAACAGCCAG	AACUAAC	AACUAAC	8	6		NA	NA	NA	No	YES	No	No	No	NA	NA
I	511071	511166	96	-1	SPAC227.08c	SPAC227.08c.1:exon:2-SPAC227.08c.1:exon:1	int_1227	4	3	1	0	0	2	1	2	A	AUAACUAAUAU	12	4	dbr1_1;dbr1_2	30	38	1.79053	1.40427	15.5	39	4.71417	4.4597	GTATGTATATATAAAGAAGAGTAATATGAATATATATTTCATGTATTTTTCTATTTGTTTTTGTTTCTACCTTCATGATAACTAATATTATATAAG	AACUAAU	AACUAAU	12	4		NA	NA	NA	No	YES	No	No	No	NA	NA
I	5329806	5329877	72	1	SPAP8A3.08	SPAP8A3.08.1:exon:4-SPAP8A3.08.1:exon:5	int_1110	18	6	12	0	0	14	2	2	A;A	UAUACUAACUG;UUAUACUAACU	14;15	16;2	dbr1_1;dbr1_2	6	5	3.52749	4.02094	0.777778	1.2	6.07473	6.57108	GTATGCTCTATTACTACTCTGGGCTTCGGCAATCAACTACCTATACTTAATTATACTAACTGCTTCCTTTAG	UACUAAC	UACUAAC	14	16		NA	NA	NA	No	YES	No	No	No	NA	NA
III	1845974	1846062	89	-1	SPCC1223.04c	SPCC1223.04c.1:exon:2-SPCC1223.04c.1:exon:1	int_5230	11	8	3	0	0	7	2	2	A;A	AGUAUUAACUA;UGCUGGUAGUA	10;17	10;1	dbr1_1;dbr1_2	1	3	2.48472	3.58388	2	1.33333	0.653028	0.207879	GTACGTTTATTTAAAATTGATGACTATAACTCTTCAACGAAACTTGAAGGGTCAGTTAAAAGCTGTGCTGGTAGTATTAACTATATTAG	UAUUAAC	UAUUAAC	10	10	CUGGUAG	17	1	NA	No	YES	No	No	No	NA	NA
III	909055	909288	234	1	SPCC24B10.05	SPCC24B10.05.1:exon:1-SPCC24B10.05.1:exon:2	int_4566	13	8	5	0	0	13	1	2	A	GAUAUUAACAU	13	13	dbr1_1;dbr1_2	28	30	6.47953	6.35152	9.66667	15.5	8.17909	8.02378	GTATGTACTTGAATTTTAGAATGTGTGGTTTTAAGTTTTGTGAAGGCTATTTAAATAGTTGAATGAAAAAACTTAGTAAGCAAACGTTTTATTTATTTGTTCAATTTAATCTTGGATTGCCTTAAGTTTTTTATATCCATTATAAAGATGTCTTTTGAAGCATTCTCAACTCCAACCTTCACATTTTCTTCCAAATGTTCGCTTTCATTGATTAGATATTAACATGAATTATAG	UAUUAAC	UAUUAAC	13	13		NA	NA	NA	No	YES	No	No	No	NA	NA
I	1645232	1645355	124	-1	SPAC343.04c	SPAC343.04c.1:exon:3-SPAC343.04c.1:exon:2	int_1514	13	11	2	0	0	10	1	2	A	UAUUCUAACAU	13	13	dbr1_1;dbr1_2	34	28	5.37548	5.92256	35	14.5	4.83057	5.17709	GTAAACAGGATAATTTAATTGAACGAAAAGTACAAGTTACACTGTATCAGTTCATGCTGTTGCAATCGATGCTTTTCGAATCAACTAGTTTCGATTACCCACTTTATTCTAACATGTACTCTAG	UUCUAAC	UUCUAAC	13	13		NA	NA	NA	No	YES	No	No	No	NA	NA
I	709645	709744	100	-1	SPAC1296.01c	SPAC1296.01c.1:exon:4-SPAC1296.01c.1:exon:3	int_1266	47	16	30	0	1	23	2	3	A;A	CUUACUAACAA;ACUUACUAACA	10;11	35;12	dbr1_1;dbr1_2;wt_2	25	18	4.96045	5.46639	26	19	5.99331	6.14415	GTAAGACACATACTTTTATTATTGCGAGATGATTCATTTACATATTGATATCCATCTTGTTCCTTTGTATTTCTTTGAGTTTACTTACTAACAATCTTAG	UACUAAC	UACUAAC	10	35		NA	NA	NA	No	YES	No	No	No	NA	NA
III	2196523	2196645	123	-1	SPCC830.08c	SPCC830.08c.1:exon:3-SPCC830.08c.1:exon:2	int_5309	5	3	2	0	0	4	2	2	A;A	UUUACUAACUG;AUUUACUAACU	21;22	3;2	dbr1_1;dbr1_2	52	39	4.01793	3.1171	26.5	40	5.48855	5.31366	GTAAGTGTTTAAATTTTTTGTATTTAGAGGCGTGATTATAAGATCATTAAGGATCTAATAAATTTTGCTCTCTGCTTTTAAATTTATTTTTTTTATTTACTAACTGGGGATTTTCCTTTTTAG	UACUAAC	UACUAAC	21	3		NA	NA	NA	No	YES	No	No	No	NA	NA
I	2481646	2481977	332	-1	SPAC19A8.04	SPAC19A8.04.1:exon:2-SPAC19A8.04.1:exon:1	int_1701	28	17	11	0	0	25	2	2	A;A	GAUUCUAACAU;UGAUUCUAACA	12;13	25;3	dbr1_1;dbr1_2	288	172	8.12457	8.25154	22.2308	43.25	8.7347	8.51306	GTATGTTAAAGATTGAGAATTATTTTTTTGTATCAACTGCTGCATAAATACCACGATGAAAAGCATCATTTTCTCTCGATTTAAGTAATTAATTTATCTACTTTCGCTTTGCTGATGCGAACGAATCTGCTATTCGGGAACTGGTGACAATGTCACTCTGTGCCAACTTTATCAATGGAGCCTAGTGATCAAATCATTCGTTTTAATGATAAATTTACTACGATCTCATATTTACCATGGATTTTAATTGTGATTTATGAGTTGCTAATTCTTTATTCTCAATGTTTATTTAGTCTATTGATATGTACCGTGTGATTCTAACATTTTTTTAG	UUCUAAC	UUCUAAC	12	25		NA	NA	NA	No	YES	No	No	No	NA	NA
II	3172350	3172402	53	1	SPBC776.01	SPBC776.01.1:exon:1-SPBC776.01.1:exon:2	int_3055	2	1	1	0	0	2	1	2	A	AAUACUAACUG	11	2	dbr1_1;dbr1_2	1031	894	8.1233	7.92806	8.97391	12.971	10.6304	10.7165	GTGAGTTTGTCTTTGTAGATTGTTGAATGAATGTTAATACTAACTGAGCTTAG	UACUAAC	UACUAAC	11	2		NA	NA	NA	No	YES	No	No	No	NA	NA
III	1621945	1622031	87	1	SPCC777.13	SPCC777.13.1:exon:5-SPCC777.13.1:exon:6	int_4698	33	19	14	0	0	24	2	2	A;A	GUUAUUAACUU;UGUUAUUAACU	12;13	30;3	dbr1_1;dbr1_2	16	13	5.02	5.39428	3.4	2.8	5.35612	5.34537	GTATGCTCATAAATTTAAATTTCGTTTGTAAAATCCTTTTTTCACATGTTATTCTCAGGACATATGTTGTTATTAACTTTTTTTTAG	UAUUAAC	UAUUAAC	12	30		NA	NA	NA	No	YES	No	No	No	NA	NA
II	1791646	1792086	441	-1	SPBC18H10.12c	SPBC18H10.12c.1:exon:2-SPBC18H10.12c.1:exon:1	int_3734	32	21	9	1	1	23	3	4	A;A;A	UGUAUUAACUG;CUGUAUUAACU;ACUGAUUACUG	14;15;97	30;1;1	dbr1_1;dbr1_2;wt_1;wt_2	156	109	9.84085	9.59777	10.4667	10	8.47468	8.83492	GTAAGTGTTTTGTCTATGGATATTTGTCTTTGGATGGATTGAATAAAGTACAGAAATCTTTTGAATGATGAAGAGTTTATCTATAAAGTACACTACAGATTGTGTTTTTTCATCTAGATAGAACCCTCCCACATTCATTTTGATCGGTTTGCAAGGGTTTTCACCTCCCAAAAATTAGTCAAACGCTTTAGCCTGTCATGGAATTTTTTATGATTGCTTTATTTTTATAAGCAATAATAAAGCAGATAATTGAGAAATATGAAAAACAAGATGATGACAACAAATTTCGGATAGCTAGCTTAGGCTGTGCGCGTTCCACAATTTACCATCTTTCGGGACTGATTACTGTTTTTCTACTTTTCTCTTTATTTATTTCTTTCCATCTAAATTACATCCATT…	UUCUAAU	UAUUAAC	14	30	UGAUUAC	97	1	NA	No	No	No	No	No	NA	YES
I	948133	948480	348	-1	SPAC222.03c	SPAC222.03c.1:exon:2-SPAC222.03c.1:exon:1	int_1331	40	25	15	0	0	26	2	2	A;A	GUCGCUAACAU;AGUCGCUAACA	14;15	34;6	dbr1_1;dbr1_2	12	16	8.43289	8.39678	2.16667	8.5	5.67927	6.12016	GTATGCTTAATAGAGAAGCTAAGGATTGATATTTACAGCCGTCTATTTTTACGTTTCAAAATTCATCGTGAATTTAAGTATTCGAAGGGTTGTCAAAAAGTTACAAAGTCTCAGTACATACCTTGAAAGTAGTGCTGTACTCGTTTAAGTCAATTGTACTGCATACCTAGCTTTTTTAAAAACTATGGTACTTTGGTAGACTAATTTTTGGCAACGTAATATTATTCCAATTTTACATAAGTATTTGTTTACTTCTTTAATACATTTACATTGTTTTATCTTATGAAAAGACCAATCCGACGAATTTCTAAAAATTTTTCTACAAAAGTCGCTAACATTCCTTTCTAG	CGCUAAC	CGCUAAC	14	34		NA	NA	NA	No	YES	No	No	No	NA	NA
III	569090	569523	434	-1	SPCC1672.04c	SPCC1672.04c.1:exon:2-SPCC1672.04c.1:exon:1	int_4980	3	1	2	0	0	2	1	2	A	UAUGUUAACAA	17	3	dbr1_1;dbr1_2	20	14	5.8185	5.62342	21	15	3.79052	4.08234	GTAAGTAATTGTTCGTTCAAAGATGTTTCAGCATTTGAAATCGTTTGGGAAAACAAGTCCTTTTTGCTTCTAAACAAAACGTACTTGCAAAATCACATAAAATCGAATGTTATGAAAAGAACAGTTTCATTGAATAGAATCTATCCATCTATGTTTGCTTATGATTGGCATGCAACTTTTTACTCAGAGCTACTACTGATATAAGAAACTATTTTTAATTCCGTTAATTAAATGGCACAATCTTAAAGAATGAGGAGCTTTGAGTTGTTGAATGCTTGCATTGGTGGAATTGATTTTCTAATTCTTTTTATTCTGCATTTGATGAGTGTCATTTTTCAACTGACAAAGTTAAAGACTTCCCATTCCATATTTCTTAATCCTATATGATATATTGAGCTT…	AACUGAC	UGUUAAC	17	3		NA	NA	NA	No	No	No	No	No	NA	NA
I	4760652	4760751	100	-1	SPAC1782.02c	SPAC1782.02c.1:exon:2-SPAC1782.02c.1:exon:1	int_2212	8	8	0	0	0	8	1	1	A	AUAUCUGACCA	15	8	dbr1_1	77	66	2.05356	1.8308	26	33.5	5.17607	4.96538	GTATGTGATTATAACTTTATTGTTTTAGTAGATAGTATTTTTTTTTTTTTTTTAATTTCTTGATTAATGTTTGAAGTGATATCTGACCATTATAATTTAG	AUCUGAC	AUCUGAC	15	8		NA	NA	NA	No	YES	No	No	No	NA	NA
I	521134	521214	81	1	SPAC227.14	SPAC227.14.1:exon:1-SPAC227.14.1:exon:2	int_85	22	15	7	0	0	16	2	2	A;A	CUGGCUAACAU;UCUGGCUAACA	13;14	19;3	dbr1_1;dbr1_2	91	55	4.49507	4.71977	10.2222	18.6667	5.75	5.5076	GTAAGTTTTTCTGTTACTATGCGAAATGGAAATGAAATGATAATACGATTTTTTTGTGATTCTGGCTAACATTTTTTAAAG	GGCUAAC	GGCUAAC	13	19		NA	NA	NA	No	YES	No	No	No	NA	NA
III	1823678	1823765	88	1	SPCC285.14	SPCC285.14.1:exon:2-SPCC285.14.1:exon:3	int_4735	17	10	7	0	0	14	2	2	A;A	CGCACUAACAU;ACGCACUAACA	15;16	14;3	dbr1_1;dbr1_2	4	9	4.61649	5.01522	5	10	3.6364	3.48461	GTAAGTACAGTAAGGAAAGTTGACCTTGTAACCTACCATCAGCTTCCATAGTTATTCTGATTGACACGCACTAACATTGTAAAAAAAG	CACUAAC	CACUAAC	15	14		NA	NA	NA	No	YES	No	No	No	NA	NA
I	580984	581083	100	-1	SPAC13A11.04c	SPAC13A11.04c.1:exon:3-SPAC13A11.04c.1:exon:2	int_1238	19	14	5	0	0	13	1	2	A	AUUACUAAUUC	8	19	dbr1_1;dbr1_2	7	5	4.15789	4.63815	2.66667	6	4.0143	4.07749	GTACGTTTAGTTGAAAACATAGCTATTGATTTAGCAACGAAACCTTTTTGCGAATATCGAGTTAGGATGCAATTCCCGAATACCAATTACTAATTCTTAG	UACUAAU	UACUAAU	8	19		NA	NA	NA	No	YES	No	No	No	NA	NA
III	891667	891891	225	-1	SPCC16A11.12c	SPCC16A11.12c.1:exon:2-SPCC16A11.12c.1:exon:1	int_5069	7	6	1	0	0	6	2	2	A;A	AUUAGCUAACU;UUAGCUAACUC	13;12	4;3	dbr1_1;dbr1_2	18	13	5.59513	5.74834	19	14	5.0013	4.79187	GTATGAATTTTCTTTAAAGGTCTCTACAGTACTTGTAAAAGGCATTATTAATTAAATTCAAAACTCATATTCATATATGTTTTGAAAGCATTGTGTCTTAGTTTTGAATATTTCATTAATTTATGTAGTTTGCATTACTTCCCACGGTGCCTAAATATATAGGTTCCCTTGGATTTTGAGGCCTCTTTTCAATTCCCATTATGTTATTAGCTAACTCAAATATAG	AGCUAAC	AGCUAAC	12	3		NA	NA	NA	No	YES	No	No	No	NA	NA
II	3935360	3935424	65	1	SPBC1677.02	SPBC1677.02.1:exon:1-SPBC1677.02.1:exon:2	int_3275	11	6	4	1	0	8	2	3	A;A	UUUAUUAACAA;GUUUAUUAACA	10;11	10;1	dbr1_1;dbr1_2;wt_1	130	106	4.96783	5.39982	13.1	21.4	4.34252	4.41894	GTATGTATACTTGCATGATGATGTTCCGGAAAAGTTGGCCAAAGAACGTTTATTAACAAAATTAG	UAUUAAC	UAUUAAC	10	10		NA	NA	NA	No	YES	No	No	No	NA	NA
II	3960697	3960780	84	-1	SPBC26H8.13c	SPBC26H8.13c.1:exon:2-SPBC26H8.13c.1:exon:1	int_4242	14	7	7	0	0	12	1	2	A	UUCACUAACAU	12	14	dbr1_1;dbr1_2	32	29	4.96045	5.31938	16.5	10	4.45838	4.47687	GTAATTTTAAATTGCTTTGTTATATGAAAATTTCTACTTCTATAATTCGTTTCCGTAATCATCGTTTCACTAACATGAATTTAG	CACUAAC	CACUAAC	12	14		NA	NA	NA	No	YES	No	No	No	NA	NA
II	3994997	3995074	78	1	SPBC3B9.03	SPBC3B9.03.1:exon:2-SPBC3B9.03.1:exon:3	int_3278	48	30	18	0	0	26	2	2	A;A	UGAACUAACAU;UUGAACUAACA	9;10	46;2	dbr1_1;dbr1_2	32	20	3.99697	3.70383	5.5	7	5.06778	4.91031	GTAATTACTTACAAAATTGATTAAGTATTGAGTCTTCTACTAAGATAGAATTGTTTGAACTTTGAACTAACATAACAG	AACUAAC	AACUAAC	9	46		NA	NA	NA	No	YES	No	No	No	NA	NA
I	2762922	2763000	79	1	SPAC6F6.15	SPAC6F6.15.1:exon:6-SPAC6F6.15.1:exon:7	int_596	23	11	12	0	0	18	2	2	A;A	GUUUUUAACAA;GGUUUUUAACA	11;12	21;2	dbr1_1;dbr1_2	171	147	4.15917	4.85537	43	13.4545	7.29663	7.43464	GTAAGTAAAACCTCCATCATACGATATGGAAATAAGATTATGTTCGACGTTTTCTTGTTCGGTTTTTAACAATATTTAG	UUUUAAC	UUUUAAC	11	21		NA	NA	NA	No	YES	No	No	No	NA	NA
II	4374886	4375042	157	-1	SPBC1539.07c	SPBC1539.07c.1:exon:2-SPBC1539.07c.1:exon:1	int_4344	18	8	10	0	0	13	2	2	A;A	UGUACUAAUAA;GUGUACUAAUA	16;17	17;1	dbr1_1;dbr1_2	11	9	3.47318	4.34996	6	5	3.37549	3.37779	GTATGAAAAAGAAAACGTAAATCATTGTCTAAAGTGTAAATGATATTGGTGCTGTAAGTCCACCAAAGGTTTACTTTTGATATTATTGTTCATCCATGAGTATATGGATAATTATCTTTTATTTTTTCTTTCTGTGTACTAATAACATTCGTTTTAG	UACUAAU	UACUAAU	16	17		NA	NA	NA	No	YES	No	No	No	NA	NA
I	180722	180889	168	1	SPAC13G6.04	SPAC13G6.04.1:exon:2-SPAC13G6.04.1:exon:3	int_8	22	14	8	0	0	16	2	2	A;A	UUAGCUAACGU;AUUAGCUAACG	10;11	17;5	dbr1_1;dbr1_2	19	13	8.18652	8.68225	1.42857	1.55556	7.48769	7.06365	GTATGCTCTTGAAAAATTTGGTTTTCTATTTTGTTGGCTTGGGTTCTCGTGTTAACGATTGCTACTCAACTAGATGAGCAAAGTTATTGTAGAGCCTAAGACATCATCTAAGTTACTCTAAACTTCTGAAGTTTTAACTTTCCTTTATATATTAGCTAACGTTACCAG	AGCUAAC	AGCUAAC	10	17		NA	NA	NA	No	YES	No	No	No	NA	NA
I	1252808	1253429	622	-1	SPAC56E4.04c	SPAC56E4.04c.1:exon:2-SPAC56E4.04c.1:exon:1	int_1403	135	68	67	0	0	44	1	2	A	UUUAUUAACCA	12	135	dbr1_1;dbr1_2	93	50	9.62427	9.55598	8.54545	8.5	7.82479	7.48728	GTATGTTATATTAATCATTTGATGTAGGAATTGCTTGTAGAAAGTTTTGAGATATTGCTGAGCGTCTGCGGATGAAATGGGTTGTTGTCGAACGGTCAGAAGACTAGCTTTTTTCGTTGATAATTTGGCAAAAACGAGTTAGATAAACTTCTTTACTATGTATACAGTAATTGCTAGTCTCATTTCCTCTAAAATGACACTGTGTGCAAAATCGAATGTTTCTTCATGCGGAACTTGCTGCCCATGTTTATCACTTTTCAAGCACTAGCTGTTTGTTTTTTCCTTAGAAACCATTCTTTCACGATTATTCATAGAGGATACATTGTTTCTTTACGCGTAGATTTCAAACATGGATTTGTGTGTCTCTGCTGTTGACTGGCATGATTTTACTCGCTCAAT…	UAUUAAC	UAUUAAC	12	135		NA	NA	NA	No	YES	No	No	No	NA	NA
II	3054704	3054893	190	-1	SPBC13E7.08c	SPBC13E7.08c.1:exon:2-SPBC13E7.08c.1:exon:1	int_4011	5	4	1	0	0	4	2	2	A;A	CAUCCUAACAA;GCAUCCUAACA	11;12	4;1	dbr1_1;dbr1_2	13	6	4.39059	4.65203	2.33333	3.5	4.63608	4.45464	GTAAGTTGCAGTCTTATAGATGAAGCGAATTGATTCTAGCCGATGGTAGTTCTAAATGTGTATTTATTATACAGCTGCCACAGTGGTGAAAGTAATAAATCGCTTCATGAGGCTTTTTAGTAAAAAATCAAAAATTAGCGTCTTTTACTATAGCAAGCTATTTAAATCTATGCATCCTAACAAATGTTAG	UCCUAAC	UCCUAAC	11	4		NA	NA	NA	No	YES	No	No	No	NA	NA
II	1756991	1757087	97	-1	SPBC1D7.01	SPBC1D7.01.1:exon:1-SPBC1D7.01.1:three_prime_UTR:1	int_3718	13	6	7	0	0	10	2	2	A;A	UAAACUAAUGA;GUAAACUAAUG	20;21	12;1	dbr1_1;dbr1_2	12	13	5.16789	4.99812	0.448276	0.666667	5.89642	5.93799	GTACGTATTTCATCATTGAGAAGAGAATTATTTTGTTAGGAATTTCCCTCTTTTTAACTGTGTTACATGGTAAACTAATGAGCTTTGGGCATATTAG	AACUAAU	AACUAAU	20	12		NA	NA	NA	No	YES	No	No	No	NA	NA
I	306211	306315	105	1	SPAC18B11.07c	SPAC18B11.07c.1:exon:3-SPAC18B11.07c.1:exon:4	int_24	39	19	20	0	0	28	2	2	A;A	UUUACUUACUU;CUUACUUAUUG	15;11	20;19	dbr1_1;dbr1_2	55	57	4.68361	4.20098	14	8.28571	5.47899	5.54285	GTATGCTTAGTCATTGTATTTAGACAAGTCTTAAATTAGATTATTTGATTTGTTGTAATTTACTTTTTTCTTGGTTTTTTTTGTTTACTTACTTATTGGCTTTAG	AUUUGAU	UACUUAC	15	20	UACUUAU	11	19	NA	YES	No	No	No	No	NA	NA
I	4091358	4091659	302	-1	SPAC23A1.06c	SPAC23A1.06c.1:exon:4-SPAC23A1.06c.1:exon:3	int_2093	29	19	10	0	0	24	2	2	A;A	UUAUCUAACUC;UUUAUCUAACU	12;13	24;5	dbr1_1;dbr1_2	3	3	7.4847	7.29617	2	2	0.712528	1.41938	GTATGTAAATTATTGAAATTAATGACTTATTTATTGAAATTTGAGAGGGATTTGGGTTTTTGGAGTCTTCATCAATTTTCAAAAGAAAGGGTTGAATAATAACGTCTCAGCATGAAGACATAGTTTTGTGGCTATACTTGGCAAACTACAAAGGCCTTGTGCAATTTTTTGACATGAATGAGAATGAGTTAGTGAAGCTAGAAATCATTATTCGCACATTGTATTATGAAGTTGTTGTTGCCCATTCCCCTTTCAAATATTCTATCAATTATTTTATTATTGTTTATCTAACTCTTTTTCAG	AUCUAAC	AUCUAAC	12	24		NA	NA	NA	No	YES	No	No	No	NA	NA
III	405830	406302	473	1	SPCC1682.16	SPCC1682.16.1:exon:1-SPCC1682.16.1:exon:2	int_4454	40	22	18	0	0	25	2	2	A;A	UUCCCUAACCU;UUUCCCUAACC	11;12	38;2	dbr1_1;dbr1_2	109	116	9.80281	9.79143	12.2222	39	7.93637	7.94304	GTAAGTAATTACTCAAACTTTTGGGAGATTGTTTGCTTTACGTGGAGGATATATACAAGTGAAATGTGAAAATGGATGTGAAGACCTTATTATTAGTAATGCATATGTTGGGCGTTGAATTCCTTCATAAAGAATTTTTTGTGGCGTATGAATGGGAACCATGTTTAAATGCATATAATCATTTGCCCGTTCCTTTTTTTTTTTAAAGATAAGTTCAGTGGGCAAAATCTGTGTTCAAAAACTGTTTGGTTCTAACCTCTCCATCCAGCAAAAATTCTTTTTGAAATGCGCACACGGTATAAAAATCTATAACCGGAAGCATGAAACACTCTGTTTACTGGTTTCATAGCAAATCGTTGGGAAAGTAGATACCTCACGTATAGTCATCCTTCTCTTTTT…	CCCUAAC	CCCUAAC	11	38		NA	NA	NA	No	YES	No	No	No	NA	NA
I	4383594	4383749	156	1	SPAC1527.02	SPAC1527.02.1:exon:2-SPAC1527.02.1:exon:3	int_875	6	2	4	0	0	6	1	2	A	AUUGCUAACUU	14	6	dbr1_1;dbr1_2	31	20	6.56582	6.90546	4.57143	1.90909	4.88391	4.8052	GTATGTTATAGAAAAGCCAAATTCAATTTTGGTACAATCTCTTTTTTGAAATGTATACATCCCCTATTGTAGAACATGGGTTTCGTATTATAACTTTGCAGTAATCTGGCCTCTATGATTGCTACTTTTTTTTCGATTGCTAACTTATTTCTTTAG	UGCUAAC	UGCUAAC	14	6		NA	NA	NA	No	YES	No	No	No	NA	NA
I	711413	711767	355	1	SPAC1296.02	SPAC1296.02.1:exon:1-SPAC1296.02.1:exon:2	int_139	12	9	3	0	0	10	2	2	A;A	UUCACUAACAU;CUUCACUAACA	12;13	11;1	dbr1_1;dbr1_2	129	96	9.71157	9.68472	43.3333	48.5	7.38165	7.10178	GTAAGTCCTTTGAAAGCTTAGTAAAGTTTGTCATAGCAGCTTAATGGTTAAAGCTTGTTTAGTACTGGCTATAGGAGTAAAGCTTCCGTTGACTCTTGATCTCCGATGTACAGTTTTGCTATTAATTATATATCGGAAGTTAGGCTTGTGTGCCCATTCATTCTTTTCTATATTTTACAGACCTAAAAAGTAATCAAAAGAATGAAAATCGACGTTGCCTATAGCCCACTCTCTTAAAACGCTTTCTATTTCATCTATTAAGTCGCTTAGTAGATATGACTTGTTAATTTGTGCTGCCGATACATTTTAGGGCTTTTTAGCTTAATTTTTATCTCCTTCACTAACATTCTTTTAG	CACUAAC	CACUAAC	12	11		NA	NA	NA	No	YES	No	No	No	NA	NA
I	3344909	3345030	122	1	SPAC26A3.06	SPAC26A3.06.1:exon:2-SPAC26A3.06.1:exon:3	int_688	24	14	10	0	0	20	2	2	A;A	AAGACUAACGA;UAAGACUAACG	13;14	20;4	dbr1_1;dbr1_2	25	15	5.23916	5.30642	4.33333	3.2	4.77141	4.32626	GTAAGTAAAAAACTGTTTTCCAAGCTGTTAATAATCATATGAGTATATATTTTGAGAGAAAACTTTTCTCAATGTTCTGATCATGTGAAAAAAGTTAAATTTAAGACTAACGATCAATTCAG	GACUAAC	GACUAAC	13	20		NA	NA	NA	No	YES	No	No	No	NA	NA
II	1412609	1412662	54	-1	SPBC17A3.05c	SPBC17A3.05c.1:exon:2-SPBC17A3.05c.1:exon:1	int_3668	2	1	1	0	0	2	1	2	A	AUUACUAACAC	17	2	dbr1_1;dbr1_2	12	8	4.906	4.23434	6.5	4.5	5.09184	5.19959	GTACGAATAATGAGGATTGCGTGAGATTTTATTACTAACACATGTTACGTGTAG	UACUAAC	UACUAAC	17	2		NA	NA	NA	No	YES	No	No	No	NA	NA
I	3583996	3584712	717	-1	SPAC17A2.13c	SPAC17A2.13c.1:exon:2-SPAC17A2.13c.1:exon:1	int_1962	46	23	23	0	0	33	3	2	A;A;A	UUUGCUAACUG;CUUUGCUAACU;GAUGAAAAGUU	15;16;639	35;9;2	dbr1_1;dbr1_2	320	327	9.88745	9.86753	10.7	25.2308	7.63272	7.81389	GTATGTGATAAGGATCCGCTGTTGGAAGTAGATATAGCGTAATAGTACGAAATTGTCAATGAAGGGACCTTGATGAAAAGTTATTATATTGCAGTTTGCTACTGTATGTGGGAGTTCTTTGGTTTTTTAATATTGTTGGTCTTGAACAGGTTGCGTTGTTGAATGTTGCAAGGTTGTTTGTTTGATGCGGCTGAGAAAAAGAGGGGTTATGGGTTAGTACGTGGATGACTTGTGTATTTTAAAATGTCCCCAAAATCGCTTGATGAGGTTTAAAATGAGTTCTTACAACATTGTTTTGTTGTTGGACATGTTTATGATATCTGAGGTTATGGACAAGAACGGCTTGCAATTCTCTTGATTTTATGGTTTTCGTAATCATTATTTTTTGTCGCCTTTGTT…	AACUGAU	UGCUAAC	15	35	UGAAAAG	639	2	NA	No	No	No	No	No	NA	NA
I	3527494	3527594	101	-1	SPAC16E8.14c	SPAC16E8.14c.1:exon:4-SPAC16E8.14c.1:exon:3	int_1946	38	20	18	0	0	21	3	2	A;A;A	AAUUUUAACAA;CAUCUUAACAA;AAAUUUUAACA	10;20;11	35;2;1	dbr1_1;dbr1_2	26	16	3.24084	3.09655	6.75	3.4	5.39894	5.05849	GTATGTATATCAGTTAGATGCTTTTATTTTGTCCAAGATGAGGCTTAATCTCTAGGATCCACTTCTTTGCTTGTCATCTTAACAAATTTTAACAAATTTAG	UUUUAAC	UUUUAAC	10	35	UCUUAAC	20	2	NA	No	YES	No	No	No	NA	NA
II	3191656	3191701	46	1	SPBC776.09	SPBC776.09.1:exon:1-SPBC776.09.1:exon:2	int_3067	6	5	1	0	0	6	2	2	A;A	UUGAUUAACAA;GUUGAUUAACA	11;12	4;2	dbr1_1;dbr1_2	431	392	5.98121	5.6673	72	32.75	7.76351	7.52218	GTGAGTGACTAAGTAATTAGAATTGGCGTTGATTAACAATTACCAG	GAUUAAC	GAUUAAC	11	4		NA	NA	NA	No	YES	No	No	No	NA	NA
III	1732854	1733100	247	1	SPCC1450.04	SPCC1450.04.1:exon:1-SPCC1450.04.1:exon:2	int_4713	10	5	5	0	0	9	2	2	A;A	CUUUCUAACGU;CCUUUCUAACG	11;12	7;3	dbr1_1;dbr1_2	1994	1595	8.49992	8.39312	1995	532	10.8932	10.9326	GTAAGTCATTTTTGTGCGGAAAATGCATCAAAATAATAGTGAAATACCATTTGATCACAAATCGTATTTTTTTTCCTTTGTTAAAAGTTCCCTATGGCATATCTACAAGTGCAAAGACTATTTTTTAAAGCCCTCTCAATTAGACACGATAGCCGTCTTTTAACAAAAAACGTGAAAATGCTTTGTTTGTATCTTTTCACTGAGCTTGATGTTTTTTAATTACCAAATCCTTTCTAACGTTTTATAG	UUCUAAC	UUCUAAC	11	7		NA	NA	NA	No	YES	No	No	No	NA	NA
I	5276756	5276826	71	-1	SPAC2H10.02c	SPAC2H10.02c.1:exon:2-SPAC2H10.02c.1:exon:1	int_2325	15	9	6	0	0	12	1	2	A	UAUAUUAAUAA	13	15	dbr1_1;dbr1_2	45	36	5.82565	5.89259	1.76923	1.48	5.24757	4.88594	GTAATAAACTGTGGTTTTGAAACGAATGCTATGGCTTTGCCATCCTGGATTTATATTAATAAGTGCTATAG	UAUUAAU	UAUUAAU	13	15		NA	NA	NA	No	YES	No	No	No	NA	NA
I	4207715	4208057	343	-1	SPAC694.04c	SPAC694.04c.1:exon:2-SPAC694.04c.1:exon:1	int_2108	29	16	13	0	0	18	2	2	A;A	UAUACUAAUUA;UUAUACUAAUU	17;18	27;2	dbr1_1;dbr1_2	45	16	7.03823	7.33799	46	17	4.41899	3.60718	GTGAGTACTTATTTCTAAATTAGCTGTTGCAAGATGCTTGGATTTAGTTGCTGGGGGGAAAAAAAATACAGAATCAAAAGAGGTTGGATAAGTCTGATTAATTGGGACCTTAAGCGGATTAAAAGTTAGGGGCTTGTGCGGTTTTATATTGATAGCTCTTGTTTATTATTCAGGAGATTAATCATTCAATTACTCATTTTACTATGCAATTTTTTTGATTTTTGTTTGCATAATGCACAATCAATCTGTCCTGGATTTTGTACCTATGACTTTGTCCTTGTTGCTCCCTACAATAGCTTTCTTTCAAATCTTGCTCTATTATACTAATTATTAAAATATTTAG	UACUAAU	UACUAAU	17	27		NA	NA	NA	No	YES	No	No	No	NA	NA
II	1921634	1921864	231	1	SPBC16E9.19	SPBC16E9.19.1:exon:1-SPBC16E9.19.1:exon:2	int_2768	2	2	0	0	0	2	1	1	A	AGAGCUGACAA	16	2	dbr1_1	9	4	5.84566	5.85994	2	0.555556	2.56813	1.98548	GTAAGAAGCAACCTAATTCAGTCAGATATGAATTTATCAGATATAAGATCCTACCGTAACTAAATGGAAATATACGATAATTATTTTAAATTTGATACTTTGTCAAAAGGTCGGGTGCCTCGATGTAATGGAATAGGAAGGACAGGGAGAGAAAGTCAGAGGACATCTATGATTCATAAGCAATTTTTTTTTACAGTATAATTATTAAAGAGCTGACAAATTTAAAATTAG	AGCUGAC	AGCUGAC	16	2		NA	NA	NA	No	YES	No	No	No	NA	NA
I	623306	623374	69	1	SPAC1F3.05	SPAC1F3.05.1:exon:1-SPAC1F3.05.1:exon:2	int_100	1	1	0	0	0	1	1	1	A	AUCGCUGACAA	12	1	dbr1_1	3	3	3.07432	1.88071	1	4	3.01961	2.91911	GTGAGTATTCTTTTGTGACGCTATATTTTACTGTTAAGATGGGAATATGAATCGCTGACAAGTAATTAG	CGCUGAC	CGCUGAC	12	1		NA	NA	NA	No	YES	No	No	No	NA	NA
II	1714174	1714256	83	1	SPBC2F12.12c	SPBC2F12.12c.1:exon:4-SPBC2F12.12c.1:exon:5	int_2727	3	1	2	0	0	3	1	2	A	UGUCCUAACCA	17	3	dbr1_1;dbr1_2	26	18	3.70089	2.29226	13.5	19	4.4101	4.38309	GTAAGATATTTGTGTTTTTCATAATATTAACTCTCTTCCAAATTACGATTTCCATCTTTTGTCCTAACCAAAATCTTTTCTAG	UCCUAAC	UCCUAAC	17	3		NA	NA	NA	No	YES	No	No	No	NA	NA
I	4409097	4409170	74	-1	SPAC29E6.03c	SPAC29E6.03c.1:exon:2-SPAC29E6.03c.1:exon:1	int_2144	5	3	1	0	1	4	2	3	A;A	GGGACUAACAA;UGGGACUAACA	10;11	4;1	dbr1_1;dbr1_2;wt_2	0	0	3.33596	3.70577	0.125	0.0833333	5.30378	5.07445	GTATGATTTTTTTAAATACTAGTTTGAGGTTGCTTTTTTATTTAATTTTGTTCGATTGGGACTAACAAATTTAG	GACUAAC	GACUAAC	10	4		NA	NA	NA	No	YES	No	No	No	NA	NA
I	346440	346543	104	-1	SPAC12G12.02	SPAC12G12.02.1:exon:2-SPAC12G12.02.1:exon:1	int_1186	8	5	3	0	0	7	3	2	A;A;A	CGGUUUCAGUG;AAAACUAACUU;GAAAACUAACU	63;12;13	4;3;1	dbr1_1;dbr1_2	164	117	4.42993	4.49042	165	59	7.78708	7.63669	GTGTGTAATTTTTTTGCTGGTTTAAAAACATCTGCGGTTTCAGTGTGTAATAAATATTACCTTCCTTTTTATGTTAATGAATAAGAAAACTAACTTCCTTTAAG	AACUAAC	GUUUCAG	63	4	AACUAAC	12	3	NA	YES	No	No	No	No	YES	NA
III	215601	215849	249	1	SPCC1235.15	SPCC1235.15.1:exon:1-SPCC1235.15.1:exon:2	int_4409	5	4	1	0	0	5	1	2	A	UUUACUAAUCC	17	5	dbr1_1;dbr1_2	32	15	7.94394	8.01222	4.125	4	4.73489	4.54865	GTAAGTGAGCATCTTTTCTGATGTTACAATATCAATGATTTCTGAAAGTGAAACTTCATTTGCAAAATGTATCGCGATTCGAATTGCTGAAAAAAGGCGTTAGGTATCTCATGTTTGTTCGATGATACTAAGTACTTTTCGGTTTTCGGACTACAAAAATAATCCGTCTCGCTTCCCTTTCTCAAATGTTGAAAACTGATCCATCTATTTTTTTTTACAGTCCATTTTACTAATCCTTCATTCCTTTAG	UACUAAU	UACUAAU	17	5		NA	NA	NA	No	YES	No	No	No	NA	NA
I	1422072	1422179	108	1	SPAC3A12.02	SPAC3A12.02.1:exon:1-SPAC3A12.02.1:exon:2	int_321	37	23	14	0	0	20	2	2	A;A	AGCACUAACAA;CAGCACUAACA	18;19	36;1	dbr1_1;dbr1_2	10	5	4.20556	3.71977	11	2	3.73868	3.65023	GTGTGTATAGTAACTCATTGAATTTTGAGGTTTTTGTTGCCAATTAGTTATATATCCTTTTCATTATCGCTGCGGAGTATGACAGCACTAACAATTTTTTTCAACTAG	CACUAAC	CACUAAC	18	36		NA	NA	NA	No	YES	No	No	No	NA	NA
II	3065033	3065177	145	-1	SPBC30D10.16	SPBC30D10.16.1:exon:2-SPBC30D10.16.1:exon:1	int_4015	25	13	12	0	0	21	2	2	A;A	AAUAGUAACAA;AAAUAGUAACA	13;14	15;10	dbr1_1;dbr1_2	3	2	7.2012	7.55348	0.333333	0.428571	2.29749	1.92188	GTGTGTTTAACTTTATAATCCAAATATTAAGGAAGGAACAAACTGAAGATGAGAATGCTTTAAAGGTCTTTTTTGAAGTAATTTCATTCGAGGGGTTAAACTATCTTAGTTGATATAAAATTACAAATAGTAACAAATATAATAG	AGUUGAU	UAGUAAC	13	15		NA	NA	NA	No	No	No	No	No	YES	NA
III	1522596	1523135	540	-1	SPCC584.15c	SPCC584.15c.1:exon:2-SPCC584.15c.1:exon:1	int_5162	51	25	26	0	0	33	2	2	A;A	CUGGCUAACUU;ACUGGCUAACU	15;16	41;10	dbr1_1;dbr1_2	51	39	7.50385	7.56418	10.4	8	5.70126	5.74226	GTAAGAAATCACTCTTTTTCGTGTTTATATCAAGATTTGAGAGGCCAGGATAGTGGTTAATCTCTCTGCAACATCTTTATAATTGCTTTGTTTCCGTTTACGAAATAGTGTTTGGGGATTTTTCGAATTAATGTTTAGGTTTTAAGTCTTCGGATGTTGAAAAAAGCTTTTAGTTAGCCATCAAGTTAGTATAACATCTGAAATTGATTCAATTTGCTCGTTCAATAGTTTGCTATTTGATTGTTTCTGAAAATCGGCATTTTTCGGAATGGCCGAAGGAATTGGACGGGTAGGCGCTTTTTAGAAAATTTTTTTTTCTTTACAAAGCGCTGTCTTTATTCCATCTTTTTTAATACTTTTTCTAAGTTTTCTACTTATTTCCCTACATTTTTTTTTTAA…	GGCUAAC	GGCUAAC	15	41		NA	NA	NA	No	YES	No	No	No	NA	NA
I	5004953	5005120	168	1	SPAC890.03	SPAC890.03.1:exon:3-SPAC890.03.1:exon:4	int_1047	15	7	8	0	0	11	2	2	A;A	CUUGCUAACAU;CCUUGCUAACA	15;16	13;2	dbr1_1;dbr1_2	6	6	6.84735	7.07588	3.5	7	2.31659	2.8308	GTATGGGTTATTCAAAGATTACTATGTCTCTAAGTTATAAAAAGAAGAATAAACGGCTCGTAAATTGCGAATATTGACCGTTCCAAAGTCGGTTGATTACATTATGAGAATGATAAACGTTTTATTCATCAATAAATTGATTGTACCTTGCTAACATTTTTATTAAAG	UGCUAAC	UGCUAAC	15	13		NA	NA	NA	No	YES	No	No	No	NA	NA
II	771856	771985	130	1	SPBC577.11	SPBC577.11.1:exon:2-SPBC577.11.1:exon:3	int_2496	23	11	12	0	0	17	1	2	A	AUUACUCACAU	13	23	dbr1_1;dbr1_2	39	37	4.87668	4.89286	4.44444	3.16667	5.44587	5.44971	GTACGTTTGAAATGTCATTTAAGCGAGTAATGTATCTTCCTTCATGGATGAAAAAATTTTTATTTCAAGCATACATTATTTGCTTATATTTACCATTATTATTGTATTTAATTACTCACATTTGTTTCAG	AUUUAAU	UACUCAC	13	23		NA	NA	NA	No	No	No	No	No	NA	NA
I	2693107	2693185	79	-1	SPAC644.11c	SPAC644.11c.1:exon:3-SPAC644.11c.1:exon:2	int_1751	27	15	12	0	0	16	2	2	A;A	AAAGCUAACUG;CAAAGCUAACU	11;12	24;3	dbr1_1;dbr1_2	53	48	4.79962	4.82295	18	9.8	5.60649	5.62344	GTAGGTCAAATGTGTATATTTGCATGTTCGATACTTGTCGAAACATAACCAGAAATCAAACAAAGCTAACTGGTTGAAG	AGCUAAC	AGCUAAC	11	24		NA	NA	NA	No	YES	No	No	No	NA	NA
I	2327863	2328646	784	1	SPAC6C3.04	SPAC6C3.04.1:exon:1-SPAC6C3.04.1:exon:2	int_497	4	3	1	0	0	4	1	2	A	UUUACUAACUU	16	4	dbr1_1;dbr1_2	32	31	7.67104	7.56335	3.3	3.2	3.91981	4.21162	GTAAGTGCAAGCCTAAAGGTGTTTGAGATTTGATCTTGTCGAGAGGCAGTAGGATATTCTCTAGTGCATAGTTTAGAAAATCCTCCTTTGTGATAATTTTGATTTTGCGTTTCGTTGGCCTTTTGGTCTTACGAAATGTCGGTTTTCTTGAAAGAAAGTCTTATATTTTTGGTTGGAAATATAGTTTACTCGATGCTCTAATTCATGTCTGCCAATGCTAGGACTTTTTTCATCTGCGCTTATCTTGGGGTCAATCCTATACATAGCGTATGCAAATTTTCACTCAAAATGGGTTCATTTCTCTTACTTTGAAGAGGATAGAAAAGGTCTTCAAAAGCTCAATTTTTTTTTCTATTTAAAATTAGATGCCGTTATTGATAATGACTACGCTACTAAATT…	UACUAAC	UACUAAC	16	4		NA	NA	NA	No	YES	No	No	No	NA	NA
I	2193164	2193288	125	-1	SPAC1783.04c	SPAC1783.04c.1:exon:2-SPAC1783.04c.1:exon:1	int_1642	8	3	5	0	0	7	1	2	A	UUUACUAAUAC	14	8	dbr1_1;dbr1_2	120	75	5.21706	5.11091	40.3333	76	5.31545	4.91192	GTATGTTGCTTATTTATGGTTTTCCTTCTTTTATTTTAACTTTTCACTTAAAAAAAAAGTGGGATTAAAAAAAAAATTAAATATTATAATCGTACAAAGGCTCATTTACTAATACGTTTAAACAG	UACUAAU	UACUAAU	14	8		NA	NA	NA	No	YES	No	No	No	NA	NA
I	3114277	3114362	86	-1	SPAC688.02c	SPAC688.02c.1:exon:2-SPAC688.02c.1:exon:1	int_1851	5	4	1	0	0	5	1	2	A	GAUUUUAACAC	12	5	dbr1_1;dbr1_2	2	2	2.27115	2.41096	3	3	1.97339	2.04281	GTGTGTTTCATAATCCCATGTAGTTTAGAGCTTTTATTTATGCTTTTAATTTGAAATTAGAAAATCTGATTTTAACACTTTATAAG	AUCUGAU	UUUUAAC	12	5		NA	NA	NA	No	No	No	No	No	NA	NA
II	1403591	1403811	221	1	SPBC17A3.02	SPBC17A3.02.1:exon:4-SPBC17A3.02.1:exon:5	int_2648	6	3	3	0	0	4	1	2	A	UUUAUUGACCU	15	6	dbr1_1;dbr1_2	3	0	5.22421	5.09856	4	0.5	2.63852	-16.6096	GTAAGTGATTTTGGTGACTAGTATTCCAATTCATTATATGTTGCCTTGGTAAAATACATAGGAATTTAAGGATAGACGTTTGATTTCAAATATTACTCCTCACGATCATTAAGCAGCTTTTATGAATGTGTTCAATTTCGTTTTAAAAAGTTTCAAGTCTTTGCAACTATTAGGATTGTTTTTCATTTGCTTTTCGCAATTTATTGACCTTACGAATATAG	UAUUGAC	UAUUGAC	15	6		NA	NA	NA	No	YES	No	No	No	NA	NA
II	3850188	3850323	136	1	SPBC23E6.05	SPBC23E6.05.1:exon:1-SPBC23E6.05.1:exon:2	int_3261	27	18	9	0	0	20	2	2	A;A	GUGACUAACAG;AGUGACUAACA	11;12	26;1	dbr1_1;dbr1_2	46	41	4.2653	4.43782	23.5	21	5.93142	5.75645	GTAAGTAATTGTTCATTTTTTCTTTTAAGCGTGTTCATCTTTTGATGACAATCTTTTTTGCAACTTGCTTCCAAAATTTATTCCGATAATTGTTCTTTCCATTATTTAATATATTTTAGTGACTAACAGAGATCAG	GACUAAC	GACUAAC	11	26		NA	NA	NA	No	YES	No	No	No	NA	NA
II	3520560	3520707	148	1	SPBC1105.08	SPBC1105.08.1:exon:1-SPBC1105.08.1:exon:2	int_3185	18	9	9	0	0	14	2	2	A;A	GUUACUAACUU;UGUUACUAACU	12;13	17;1	dbr1_1;dbr1_2	37	25	6.0364	6.21273	7.6	3.25	4.80641	4.60192	GTACGTGGTTGATAGCTCACATGAAGGTTCATGTGTTTTTTTAAAAACTTTACAATTTTAAATTAGGAAAACACTATAGAAATATGATTTAATGAAGGATATAACATTTTCTCTCGAACTTTTTTGCTTGTTACTAACTTCACTTTAG	UACUAAC	UACUAAC	12	17		NA	NA	NA	No	YES	No	No	No	NA	NA
II	2291800	2291889	90	1	SPBC16H5.05c	SPBC16H5.05c.1:exon:3-SPBC16H5.05c.1:exon:4	int_2844	36	24	12	0	0	23	2	2	A;A	UAUACUAAUUA;AUAUACUAAUU	11;12	34;2	dbr1_1;dbr1_2	29	17	3.20556	3.8193	30	18	5.36168	5.6673	GTAAGTTAAATCGTTGATGAGCAACGTTGTAGTCCCAAATGTTGCAACATTAAACTGCTTCGGGTTTACAAATATACTAATTAAATACAG	UACUAAU	UACUAAU	11	34		NA	NA	NA	No	YES	No	No	No	NA	NA
II	2295234	2295323	90	1	SPBC16H5.03c	SPBC16H5.03c.1:exon:2-SPBC16H5.03c.1:exon:3	int_2846	7	5	2	0	0	7	2	2	A;A	AACUCUUAUAC;UUUAUUAACUC	9;15	4;3	dbr1_1;dbr1_2	3	6	3.05356	3.42337	4	7	3.73608	4.57538	GTAAGTGAGTTGTATATTTAAATTTTTTAAACCTTAAGAAACGTTTCGTCTACATGTTTTTATCGCGATTTATTAACTCTTATACTGTAG	UAUUAAC	CUCUUAU	9	4	UAUUAAC	15	3	NA	No	No	No	No	No	NA	NA
III	2204496	2204615	120	1	SPCC1919.01	SPCC1919.01.1:exon:1-SPCC1919.01.1:exon:2	int_4828	34	19	15	0	0	24	2	2	A;A	ACUGCUAACCA;AACUGCUAACC	45;46	29;5	dbr1_1;dbr1_2	3	0	2.71652	2.76041	2	0.333333	4.18233	4.56066	GTATGATTTTTCTTCGTCGAAATGTAAGACTATGCATTTCACGAAGGTATTAAAATTGCTAGAGTAAAACTGCTAACCAATTATCCATCACATGAGAGCATGTGTTGGTCTTAAATTTAG	UGCUAAC	UGCUAAC	45	29		NA	NA	NA	No	YES	No	No	No	NA	NA
I	733252	733368	117	1	SPAC22G7.04	SPAC22G7.04.1:exon:3-SPAC22G7.04.1:exon:4	int_158	10	6	4	0	0	7	1	2	A	AGUACUAAUCU	8	10	dbr1_1;dbr1_2	31	21	3.86267	4.18925	32	5.5	4.34933	4.43334	GTAAGTATATCATGATATGCATTCTTGATCTAGTAGTTCCGTACCTTGTGTTCAGCGATCTATGATCATTTTGTATTCATGCTTTCTATGTTCAAAACATGCAGTACTAATCTCTAG	UACUAAU	UACUAAU	8	10		NA	NA	NA	No	YES	No	No	No	NA	NA
III	2236514	2236636	123	-1	SPCC1919.13c	SPCC1919.13c.1:exon:2-SPCC1919.13c.1:exon:1	int_5324	7	6	1	0	0	7	2	2	A;A	AUCGCUAAUUA;UAUCGCUAAUU	11;12	6;1	dbr1_1;dbr1_2	13	6	3.6809	3.53214	3.5	1.4	3.12995	2.97924	GTAAGTTTGAAGTTAAAGTTTTTTATTCGTAAATAATTTAAAAAATAAATTTGGAAACGCCGTTCATAATAGCTTTTATTACTTTTAATGAGACATATCTCGAATATCGCTAATTAATTCTAG	CGCUAAU	CGCUAAU	11	6		NA	NA	NA	No	YES	No	No	No	NA	NA
II	499398	499555	158	1	SPBC1685.03	SPBC1685.03.1:exon:1-SPBC1685.03.1:exon:2	int_2430	29	15	14	0	0	23	2	2	A;A	UAUACUAACGU;UUAUACUAACG	16;17	24;5	dbr1_1;dbr1_2	45	21	6.17499	6.45098	23	22	3.78386	3.60619	GTAAGAAAAATAATTTGCTGCGATGCCTGATTTGTTTGTTCTCTGGCAATACTTGCTTATGACTTTGAATGGACGACACGTCGATTCGGCAAAGCGCTATTTAAACGTTTTCAACTTTTAACGATTCAAATCTGTTATACTAACGTGTAAATTTACAG	UACUAAC	UACUAAC	16	24		NA	NA	NA	No	YES	No	No	No	NA	NA
I	2830600	2830798	199	1	SPAC3F10.19	SPAC3F10.19.1:exon:1-SPAC3F10.19.1:exon:2	int_610	3	2	1	0	0	3	2	2	A;A	AAUAACUAACA;AUAACUAACAA	13;12	2;1	dbr1_1;dbr1_2	0	0	8.20952	8.31608	1	1	6.81732	6.76266	GTAAGTTTAATCCAATTTTTTACTTTTAAACGTTGAATTATCCAAAATGCTGATTGTTCTGCTATCTTTTTTTGTAAGAGACAGGGCTTAAAGGTCTAAGTACTTTTTTGAAAACTTATAATACAATTGTACTGCAGCACGGCATTTGATGATTTAACTCTTTTTTAGTCTTTTTGTATAATAACTAACAATCATTTAG	AACUAAC	AACUAAC	12	1		NA	NA	NA	No	YES	No	No	No	NA	NA
II	2928295	2928558	264	1	SPBC1703.07	SPBC1703.07.1:exon:2-SPBC1703.07.1:exon:3	int_2991	4	3	1	0	0	4	3	2	A;A;A	UUUAUUAACUG;AUUUAUUAACU;UUUUCUAAUCU	14;15;32	2;1;1	dbr1_1;dbr1_2	420	347	7.21983	7.65633	70.1667	69.6	8.76222	8.63775	GTAAGTTGTCCGCATAAATATGCTTATTAGTTTGCAAATAAGCGTTTTAGCAAAAGATGTTCATGCTGATTTTCGATATTACATCAGTGATTCGTTTTCTACAACAAATCGCAGACGGAAATGATTAAATCACAGTAAGACTATTTTCTTTAAGTTTGAATTCAATTTCGATTATTTTGCAGAAAATAGAAATGCTGCGACTAGCATTATCACTAATAAAAAAAATTTTCTAATCTTAAAAGATTTATTAACTGAAATAATTAG	UUCUAAU	UAUUAAC	14	2	UUCUAAU	32	1	NA	No	No	No	No	No	NA	NA
II	441841	441915	75	-1	SPBC428.01c	SPBC428.01c.1:exon:2-SPBC428.01c.1:exon:1	int_3448	2	1	1	0	0	2	1	2	A	AGUACUAACAU	10	2	dbr1_1;dbr1_2	24	26	6.32658	6.05319	2.77778	9	5.64072	5.61336	GTAAGTTAATAATAAGATTTTAACCCTTATTGTCAATTTCTACTGCTTGGAACACAGAAGTACTAACATACGAAG	UACUAAC	UACUAAC	10	2		NA	NA	NA	No	YES	No	No	No	NA	NA
II	2100413	2100519	107	1	SPBC23G7.16	SPBC23G7.16.1:exon:2-SPBC23G7.16.1:exon:3	int_2800	23	12	11	0	0	17	2	2	A;A	UUUUCUAACCU;AUUUUCUAACC	9;10	22;1	dbr1_1;dbr1_2	12	1	4.41538	4.41769	2.6	0.5	4.26001	0.966866	GTACGTTCGTTTATGAAGTTCTAGATAACTGTTGGTACAATTATTTTCATTGACTTTTTCCCGATTTATTATATTTTTTAAACGTTCGTTATTTTCTAACCTTGCAG	UUCUAAC	UUCUAAC	9	22		NA	NA	NA	No	YES	No	No	No	NA	NA
III	2140844	2141010	167	-1	SPCC126.13c	SPCC126.13c.1:exon:2-SPCC126.13c.1:exon:1	int_5294	27	17	10	0	0	21	2	2	A;A	UAUGCUAACGA;UUAUGCUAACG	14;15	23;4	dbr1_1;dbr1_2	9	8	6.89265	6.98403	3.33333	9	3.7023	4.13043	GTAAGTAAATCGTGTTAACGGGAAAATTTCAGTTGTTGTATATGAACTCATACTTCATTGGGACTACGATTAGAAAATCCGTCAAAGGATCATCCATGAACAATTTATATGTCAATTAGATTTATATGTTTCAAATCTTAAACTTTTATGCTAACGATTAATCTTAG	UGCUAAC	UGCUAAC	14	23		NA	NA	NA	No	YES	No	No	No	NA	NA
I	415686	415762	77	1	SPAC31A2.14	SPAC31A2.14.1:exon:1-SPAC31A2.14.1:exon:2	int_53	16	11	5	0	0	12	2	2	A;A	CGUUCUAACAU;ACGUUCUAACA	11;12	13;3	dbr1_1;dbr1_2	5	3	3.69366	3.85994	1.2	0.363636	3.53677	3.44102	GTAAGCCTTTGAAAAATTTAATTATCTCTGGAGAATAGCGGTAGCCTTATAGAAATTGACGTTCTAACATTTATTAG	UUCUAAC	UUCUAAC	11	13		NA	NA	NA	No	YES	No	No	No	NA	NA
II	3022549	3022636	88	1	SPBC15D4.06	SPBC15D4.06.1:exon:1-SPBC15D4.06.1:exon:2	int_3021	26	16	10	0	0	18	1	2	A	UUUACUGACAG	11	26	dbr1_1;dbr1_2	51	37	3.87025	3.60019	26	9.5	3.81235	3.33212	GTATGTTCCCATTTCATTGATTTCTCAAACTGCTTCTTGCATATTATGAAACTCGGCAATATCATTATAGTTTACTGACAGATTAAAG	UACUGAC	UACUGAC	11	26		NA	NA	NA	No	YES	No	No	No	NA	NA
I	2284718	2284844	127	-1	SPAC4G9.17c	SPAC4G9.17c.1:exon:2-SPAC4G9.17c.1:exon:1	int_1655	8	2	6	0	0	7	2	2	A;A	UUUACUAACUA;UUUUACUAACU	11;12	7;1	dbr1_1;dbr1_2	35	27	4.45289	4.7447	12	14	3.99876	4.07109	GTATGTTGTTCATTTGTTCTATAAATAATCTTTTAAAAGCTTAGACAGTTCTGTTTTCTGTTTATCGATTAGTTTTATTCGACATGTTTACTTGTCCTGCAATGACAATTTTACTAACTAAATATAG	UACUAAC	UACUAAC	11	7		NA	NA	NA	No	YES	No	No	No	NA	NA
I	1049199	1049364	166	1	SPAC23C4.12	SPAC23C4.12.1:exon:1-SPAC23C4.12.1:exon:2	int_240	9	5	4	0	0	9	2	2	A;A	CUUUCUAACAU;UCUUUCUAACA	8;9	7;2	dbr1_1;dbr1_2	6	7	9.01027	9.03204	2.33333	4	5.17087	5.21604	GTAAGTAGTGCTTTAATATTTTTTTACTTAAGTATAAGTTGGATTTCTTTCGGAACTCCAATTTCTTCTTTATATCTATCAACCGTAGCTCGATGTTTTACAACCAAAAAGGAAAAGCAAAAGTTACTCCATTTGGTTATTTTTCTTTTTTCTTTCTAACATTTAG	UUCUAAC	UUCUAAC	8	7		NA	NA	NA	No	YES	No	No	No	NA	NA
I	3560942	3561256	315	1	SPAC17A2.05	SPAC17A2.05.1:exon:1-SPAC17A2.05.1:exon:2	int_735	13	8	5	0	0	12	1	2	A	UUAACUAACAA	12	13	dbr1_1;dbr1_2	23	9	9.11485	9.18307	4	10	3.42129	3.13457	GTAAGTGAAATTGATTATCAAAAATTGTGCAATAGGAAATGAAGCGTAACCTGGAGTAAATTTAGCACTTTCGACACGTATGGATCTTGTTAAGCAATTGGTTTCGAAATAAATCTCAGATATTCAGGATGTCACTTTATCAATACGTCTGGCATATTGTGGTTCTTAATCGGTAAATTCTAATCTCACTGTACTCATGCATGTCCCTTCGTGTATTTCTTTGGTTGACTCATTTCTTTTGTGCTCCTTACTATTTGTCTATATTAAACTATTAATTTCTTCTGTTTGTTATTTTATTAACTAACAATCTTTTAG	AACUAAC	AACUAAC	12	13		NA	NA	NA	No	YES	No	No	No	NA	NA
III	223604	223686	83	1	SPCC548.04	SPCC548.04.1:exon:2-SPCC548.04.1:exon:3	int_4413	46	29	17	0	0	29	1	2	A	AGAACUAACAC	14	46	dbr1_1;dbr1_2	16	16	5.15019	5.19915	1.0625	1.21429	4.34692	4.40991	GTAAGTGAACATGGAGTGGTATCATCTTTTTCAGGCTCAAACGATGTTTTAAATGATTTTGCAGAACTAACACTTCCCTGCAG	AACUAAC	AACUAAC	14	46		NA	NA	NA	No	YES	No	No	No	NA	NA
I	3515855	3515932	78	1	SPAC16E8.09	SPAC16E8.09.1:exon:1-SPAC16E8.09.1:exon:2	int_730	14	6	8	0	0	11	2	2	A;A	CUAACUAACUU;UUAACUAACUA	11;15	9;5	dbr1_1;dbr1_2	43	25	5.27991	4.59135	4.88889	4.33333	4.48148	3.93249	GTATGTAACGATTGAAAGAAATTTAGAACACAAAAACGCCATTTATGTGTATGCAATTAACTAACTAACTTCTAAAAG	AACUAAC	AACUAAC	11	9	AACUAAC	15	5	NA	No	YES	No	No	No	NA	NA
II	2030487	2030586	100	-1	SPBP23A10.14c	SPBP23A10.14c.1:exon:3-SPBP23A10.14c.1:exon:2	int_3774	22	13	9	0	0	15	2	2	A;A	UAUGCUAAUAU;UUAUGCUAAUA	16;17	20;2	dbr1_1;dbr1_2	13	20	3.31659	3.72388	2.33333	1.5	4.49863	4.03884	GTATGAAAAGAACGACAATAGTATCAACCAATTCTATGGATTGGAAGAAGTTACTTTCAATCTTTCTCTTTTCAAATTATGCTAATATTTGTAAAAATAG	UGCUAAU	UGCUAAU	16	20		NA	NA	NA	No	YES	No	No	No	NA	NA
II	3282186	3282421	236	-1	SPBC25H2.02	SPBC25H2.02.1:five_prime_UTR:2-SPBC25H2.02.1:exon:1	int_4085	1	1	0	0	0	1	1	1	A	UUUACUAACAC	10	1	dbr1_1	42	32	5.98469	5.8345	10.75	3.66667	6.09499	5.9158	GTAAGAAAGTTGAAGTTAATAGACTTTGTATTTTTTTTTTTTTTTTTTAAAGCTCGGTTAAAATGATTATGTTGCGATATAACCAGTGTTGTTTAGCGGAGACCGAAATCAATATTTTCTGATATATTAGTGATCATTTTGTATACTTTATTTTACGATACACCTAATTTTTGTTTATCCTTGATAATTATTTAATCCATATATTTTATGATGGTTTATTTTACTAACACTTTTAG	UACUAAC	UACUAAC	10	1		NA	NA	NA	No	YES	No	No	No	NA	NA
I	509486	509562	77	-1	SPAC227.07c	SPAC227.07c.1:exon:3-SPAC227.07c.1:exon:2	int_1224	20	11	9	0	0	16	2	2	A;A	AUGACUAACAA;AAUGACUAACA	10;11	17;3	dbr1_1;dbr1_2	88	106	4.89006	5.20787	12.7143	11.8889	6.47736	7.03767	GTATTGGTTTTGAGTAGTTCTCTCATAAAAGAGTTCTCTTTTACTTTAATCACTGAATAAATGACTAACAAGTTTAG	GACUAAC	GACUAAC	10	17		NA	NA	NA	No	YES	No	No	No	NA	NA
I	2734928	2735331	404	-1	SPAC6F6.03c	SPAC6F6.03c.1:exon:2-SPAC6F6.03c.1:exon:1	int_1759	5	3	2	0	0	4	1	2	A	UUUUCUAACUU	10	5	dbr1_1;dbr1_2	61	38	9.30411	9.34754	1.12727	1.02632	7.03915	6.87631	GTAAGTCATTTTTGTTTTTAAAATCTATTTGCATTGTTTTTGATACATGGAAAGATCAAGCTATATGCATCTGTTATGCATTAGTTCTATTTAATTGCTGGAATAGTATTCAGTATGCCCATTGTTAAGTCAAGACTCTTTTGTATGCTTTTCAGCATATTTCCCGTCAATTGAAGTCTGTTACAACTCTGGGAGAGTATACAAACTGTCTCTAAATTATATAGCCGTTCTGGCTATATCAGAGATAGTTGTATTGTCTTTGCTTTAATTTCGGTGTTTCAAGCAGTATATCGCTGCATATAGTTGTCACACTTACAAATGTAAAGACTTACATTGTTTTCATGTATCAACGAACAACCAGATATATCTTTATTAACCAATGTTCTTTTTTCTAACTTT…	UUCUAAC	UUCUAAC	10	5		NA	NA	NA	No	YES	No	No	No	NA	NA
II	2920834	2920918	85	-1	SPBC1703.03c	SPBC1703.03c.1:exon:2-SPBC1703.03c.1:exon:1	int_3973	6	2	4	0	0	5	2	2	A;A	UACGCUAACUC;GUACGCUAACU	14;15	5;1	dbr1_1;dbr1_2	111	81	2.13602	3.65023	37.3333	16.4	5.79052	5.63541	GTATGTTTAAACTTTTAGGAATAGTTGTCATAGCATCTATGAAATGTTATCTTAAACAGCAAAGTACGCTAACTCTTCTAATTAG	UUCUAAU	CGCUAAC	14	5		NA	NA	NA	No	No	No	No	No	NA	NA
I	1744951	1745234	284	-1	SPAC105.02c	SPAC105.02c.1:exon:3-SPAC105.02c.1:exon:2	int_1543	11	7	4	0	0	10	2	2	A;A	UUGUCUAACUA;UUUGUCUAACU	18;19	7;4	dbr1_1;dbr1_2	75	51	7.85327	8.03128	5.42857	2.88889	6.2621	6.58088	GTAAGTGAATTTACAAGCCGAAGTGCTAATCATTGCTTTCGTGTTCTTTGTTATTTTCGGAAGTTATGGTCAAAGTCGAGTTGTGTATTTCTACGTTGTTTTACGAATGATTCAACGTATGCAAGATCGCTTATATTATGTAAAATTCAAACAATTCTTTGATATTACTTTCTCATAATTTTGTACTTTGCTTCCGCTTATTTCACAAACATCGATTTTGCTTCGGGATAGTTTATAGTGTTTGCTTTGTTGAGTGTATTTGTCTAACTATTGTTTCATTATAG	GUCUAAC	GUCUAAC	18	7		NA	NA	NA	No	YES	No	No	No	NA	NA
II	1764554	1764782	229	-1	SPBC11G11.06c	SPBC11G11.06c.1:exon:4-SPBC11G11.06c.1:exon:3	int_3721	7	4	3	0	0	5	2	2	A;A	AUUGCUAACAU;AAUUGCUAACA	11;12	6;1	dbr1_1;dbr1_2	25	15	6.01201	6.008	2.16667	2.28571	4.16768	3.73601	GTAAGCCTGATTTTAGACGAATAAAACCTTGGTTTATGTGAAAGAATGTTCGGTGGGATTTTATTCAAAAGTCTTTACATGAAGCAAAAATAATAATAGATGCATGTCTTAAGCTGATTTACCAAATTGCGTTTCCAGCAACCTTACAAATTCTAAAACAAACCGTTGATGCAGATTTTTGTTCTAAAATATTTAACAATTTCCCAAACCAATTGCTAACATTGCTTAG	UGCUAAC	UGCUAAC	11	6		NA	NA	NA	No	YES	No	No	No	NA	NA
II	4282373	4282552	180	1	SPBC16A3.09c	SPBC16A3.09c.1:exon:2-SPBC16A3.09c.1:exon:3	int_3334	6	5	1	0	0	5	1	2	A	AGUAUUAACAA	14	6	dbr1_1;dbr1_2	10	12	4.98166	5.08234	3.66667	13	3.64703	3.88113	GTAAGGTTTGAAAATACTTTTAAGTTTTCACATTGTTGGAGATTTGATTTTATATACTCATGAAGTTCATGTGATTTTATCTTTGAGCGCTTGCTTGCGCATTTGCTTATGGTTAACATTCTCTGCTCAATATTTTTTATATTGTTATTGGGGATTATTAGTATTAACAACTACGTCTAG	UAUUAAC	UAUUAAC	14	6		NA	NA	NA	No	YES	No	No	No	NA	NA
II	1497020	1497241	222	-1	SPBC11B10.07c	SPBC11B10.07c.1:exon:3-SPBC11B10.07c.1:exon:2	int_3681	27	13	14	0	0	20	2	2	A;A	UUUGCUAAUCA;AUUUGCUAAUC	16;17	25;2	dbr1_1;dbr1_2	13	7	10.0792	10.1074	1.75	1.6	5.03016	4.68151	GTAAGTCTAAGCATCACGCGTTTCCATAGAGCTATATGTTTCAAATTGATAAACTGGGTATATTTTGCAATACATTACTGTATTTTGGAAAGATATGATTATTTGCGAATAATTTTTATCTGATTATAGCCTTATCCTTTGTCGGTGTTAGCACACGTGTAGCCCGAACGTTACCGAAAATATCATTTTTTCTAGATCATTTGCTAATCAACATTTTATTAG	UGCUAAU	UGCUAAU	16	25		NA	NA	NA	No	YES	No	No	No	NA	NA
II	1384739	1384829	91	-1	SPBC8D2.14c	SPBC8D2.14c.1:exon:2-SPBC8D2.14c.1:exon:1	int_3659	38	16	22	0	0	23	2	2	A;A	AUGGCUAACAU;UAUGGCUAACA	12;13	33;5	dbr1_1;dbr1_2	58	65	5.4824	5.61894	59	13.2	5.57731	5.35401	GTAAGTATTTAGCTTATTGGGCATAGTCACAAACGAACGTTGCCTAAGTCTTTTCAAATCAAATGGTTAAGTATGGCTAACATTTCTTTAG	GGCUAAC	GGCUAAC	12	33		NA	NA	NA	No	YES	No	No	No	NA	NA
II	2687737	2687917	181	-1	SPBC3E7.15c	SPBC3E7.15c.1:exon:2-SPBC3E7.15c.1:exon:1	int_3926	19	10	9	0	0	12	1	2	A	UUAGCUAAUUG	18	19	dbr1_1;dbr1_2	56	44	6.21103	5.90892	28.5	45	4.00385	3.80428	GTAAGTTCAATTTGTCGTTGAAAAAGTGAGTTCTTGGTAGGATTACTTGTAAATTGAAAATTAATCAATTTCTGAGTGTTTAACATATGTATTGAGTTAAATTTCTTATTGCAAGAATTTATATTTTAGATATTTAAAGCATATAATCTTTTCAAGTTAGCTAATTGCCTTCTTCATCTAG	AGCUAAU	AGCUAAU	18	19		NA	NA	NA	No	YES	No	No	No	NA	NA
I	3452270	3452484	215	-1	SPAC3A11.09	SPAC3A11.09.1:exon:2-SPAC3A11.09.1:exon:1	int_1912	25	14	11	0	0	16	2	2	A;A	CAUACUAACUU;GCAUACUAACU	11;12	21;4	dbr1_1;dbr1_2	5	0	7.04303	6.832	1.5	0.333333	3.64242	3.40661	GTAAGTTATTAGTGGTTGCAAAGCACAATTGTTTGATTTGCGTGTTGAAACGATACTTGAATTGTTTGATTTAGCTGGTAGTAATTCCAGATTATTCTTTCGGTTTACGTTCGTTAAATAAAGAGCGATCTCTAGATATTTCAGTGTGCATATTCCACCATATTATTTTTACTCTTCAATTCTTCATATATGTGAAGCATACTAACTTAATATAG	UACUAAC	UACUAAC	11	21		NA	NA	NA	No	YES	No	No	No	NA	NA
I	3612675	3612876	202	1	SPAC17G6.12	SPAC17G6.12.1:exon:4-SPAC17G6.12.1:exon:5	int_740	5	5	0	0	0	5	1	1	A	CGUGCUAAUUG	13	5	dbr1_1	14	11	7.83492	7.84514	1.5	3	3.80914	3.72244	GTGAGTTTAAATATCGGTTTTTTATTTATAATTCTACGACAAAGATTTCATTGCACCTCGAGTGTTCAGCAGTTTTCTTTAATTTCTAAACATTTTCTCTGGACATTTTAAAGAGTGCTAGCATAAGCATCTGGTCTTTTATTATGATTAAGGAATAAATTGCATTATGTGGTAATTTTTCTCGTGCTAATTGGCGCTTTAG	UGCUAAU	UGCUAAU	13	5		NA	NA	NA	No	YES	No	No	No	NA	NA
II	2287158	2287449	292	1	SPBC16H5.07c	SPBC16H5.07c.1:exon:1-SPBC16H5.07c.1:exon:2	int_2840	43	24	19	0	0	28	3	2	A;A;A	UUUGCUAACCA;UUUUGCUAACC;CUAUACCAGCA	14;15;45	32;10;1	dbr1_1;dbr1_2	31	21	7.85897	7.65614	10.6667	11	5.13502	4.89396	GTAAGTGAACACTAAGGAGAGTATATATGTGTATCAGGCTTGGTTGGATATATCCCAACTTTGCAAGTTCTCATTTTCTCTTGATTTCTTGAGATTGTTCAGTTTGATATGTTTGAGTTTGAACTATCCAGCTTATTTCGGTTTGATTTCTAAAAAGATTAATATTACATTAATGTCGGGTTTCTAGAAATCTCATCCTATAAATATATGGTGGTTAAAAATTACGTCGGAGACTCTCATCTATACCAGCATTTTTCGTGTTTTCGCAGTTTTTGCTAACCATTTTTTCTAG	UGCUAAC	UGCUAAC	14	32	AUACCAG	45	1	NA	No	YES	No	No	No	NA	NA
II	2490841	2490970	130	-1	SPBC557.03c	SPBC557.03c.1:exon:2-SPBC557.03c.1:exon:1	int_3876	47	21	26	0	0	24	2	2	A;A	AAAGCUAACCC;CAAAGCUAACC	10;11	42;5	dbr1_1;dbr1_2	51	31	6.80433	6.96686	17.3333	32	6.14568	6.39724	GTAAGTGGTACCAAAAAGTAAATGTAATTCTTGGATTTGCGTCTGGTGATGGTTGCATGGAATACGCGATGACATCTTGTTCTTTTTTAAATTACAAATCGATTGTTAGTAGCAAAGCTAACCCTTCCAG	AGCUAAC	AGCUAAC	10	42		NA	NA	NA	No	YES	No	No	No	NA	NA
I	5025124	5025278	155	1	SPAC22E12.04	SPAC22E12.04.1:exon:2-SPAC22E12.04.1:exon:3	int_1054	25	19	6	0	0	16	2	2	A;A	UUAGCUAACGU;CUUAGCUAACG	14;15	19;6	dbr1_1;dbr1_2	20	19	5.95111	6.02053	21	6.66667	6.55171	6.53036	GTAAGTGATAAAACCAATAAGAAATGAGGAAGAAAAGAGAGATTTGTGAGTTCATCCTGCTTTACATTAGTTCATAAAATTGAAAGTAAATTGTTTGACTTCCTCTTTTACTTCCTATTTTTCTCATTTTACTCTTAGCTAACGTAGATTTTCAG	AGCUAAC	AGCUAAC	14	19		NA	NA	NA	No	YES	No	No	No	NA	NA
III	1896929	1897070	142	-1	SPCC737.06c	SPCC737.06c.1:exon:3-SPCC737.06c.1:exon:2	int_5241	26	18	8	0	0	17	1	2	A	AUCACUAACUU	11	26	dbr1_1;dbr1_2	103	81	7.63937	7.62608	26	82	6.07209	6.10944	GTAAGTACCGCAATTTACCATTGATAAGGGAAGGGAATGAGTTGGAATACACGAGTTCTCTAAATGCTTTTCATTATAGAACACTCATCTCAATGCCCTAATCACTTGGAATGTTTTGTACGGGATCACTAACTTTGCGTAG	CACUAAC	CACUAAC	11	26		NA	NA	NA	No	YES	No	No	No	NA	NA
III	1059258	1059426	169	-1	SPCC1259.15c	SPCC1259.15c.1:exon:4-SPCC1259.15c.1:exon:3	int_5109	41	28	13	0	0	30	3	2	A;A;A	ACGACUAACGU;UACGACUAACG;UCAUACGACUA	15;16;19	31;9;1	dbr1_1;dbr1_2	15	9	7.36907	7.39828	4	5	4.47502	4.02987	GTATGACTTTTATTTTGAAAGCTTAATATTTAAAGTATATGAATAATGCTTGGTGTGCTTACTTGTAGCTGCACTTTAATGGAAAATTAATACACATCTTTGTCATTACATTTTCATAACTGTCTACTCTTCTTTCTTCTTTTTCATACGACTAACGTAACGAAAATAG	GACUAAC	GACUAAC	15	31	AUACGAC	19	1	NA	No	YES	No	No	No	NA	NA
I	1135403	1135516	114	-1	SPAC56F8.05c	SPAC56F8.05c.1:exon:4-SPAC56F8.05c.1:exon:3	int_1379	21	15	6	0	0	14	1	2	A	GAUGCUAACUA	18	21	dbr1_1;dbr1_2	1498	1194	7.37865	7.7413	25.8448	36.2121	10.408	10.3596	GTAAGAATACTTAAACTTTATCAAATCATCGTCAAGATATCATATAAAGTGCACTGGGTCACAAAGCGAATGGTTGAATGTTTTATTGAGATGCTAACTATTTGTTAAATGCAG	UGCUAAC	UGCUAAC	18	21		NA	NA	NA	No	YES	No	No	No	NA	NA
I	4502431	4502509	79	1	SPAC1851.03	SPAC1851.03.1:exon:1-SPAC1851.03.1:exon:2	int_913	15	9	6	0	0	11	2	2	A;A	UUUAUUAAUCA;GUUUAUUAAUC	14;15	12;3	dbr1_1;dbr1_2	50	34	3.92969	3.45098	8.5	11.6667	5.29993	5.35637	GTTTGTGCAAATTAGGGTTAAATAAAAAAATATTTTACATTTTGGCCATATTGGACCGTTTATTAATCATTAATTGCAG	CAUUAAU	UAUUAAU	14	12		NA	NA	NA	No	No	No	No	No	NA	NA
I	1981958	1982040	83	-1	SPAC9G1.06c	SPAC9G1.06c.1:exon:2-SPAC9G1.06c.1:exon:1	int_1584	6	4	2	0	0	6	1	2	A	UAUAUUAAUGU	12	6	dbr1_1;dbr1_2	30	17	3.90734	3.81582	10.3333	18	4.04484	3.75169	GTTCGTAACATTTAAAGATGCTGTTAAGTAACGTCGCAATTATTGATGTAAAGTTTAAAAAATATATATTAATGTGTTTTCAG	UAUUAAU	UAUUAAU	12	6		NA	NA	NA	No	YES	No	No	No	NA	NA
II	2000360	2000474	115	-1	SPBP23A10.03c	SPBP23A10.03c.1:exon:2-SPBP23A10.03c.1:exon:1	int_3772	11	6	5	0	0	10	2	2	A;A	GUUUCUAACUA;AGUUUCUAACU	14;15	9;2	dbr1_1;dbr1_2	25	27	4.46073	4.54973	13	14	4.75084	4.57096	GTAAGAAAACTTATATTAGATTGAGGTTTATTATTAAAAGAAGAGAACTTTTACCAGTGCTCTTGAACTTATTGCTTCTTTTTTTGGACCTATAGTTTCTAACTATTATTGGCAG	UUCUAAC	UUCUAAC	14	9		NA	NA	NA	No	YES	No	No	No	NA	NA
I	3090286	3090532	247	-1	SPAC16A10.06c	SPAC16A10.06c.1:exon:2-SPAC16A10.06c.1:exon:1	int_1837	10	4	6	0	0	10	1	2	A	CUGACUAACAC	15	10	dbr1_1;dbr1_2	24	15	4.828	4.9381	25	5.33333	4.21433	4.24835	GTATGTGTACCATTATTACGAAAGATAATGGAAAAAATTAATATGAATTGCTTTTAAAACTCGAAAGTGGTGTTATGTCGAGATACAGTTTTTTAAAAAGAAGTTCGCTGTACAAATATACATACAAAAACATTGTTTAACTAATATTTTTCTTCCTCTTATTTCCGGCTATTGAGAGAGAGCCTAAAATAGACATAATATGACATGCTGCTTACTTTATGACTTCTGACTAACACTTGCCTTTTAG	GACUAAC	GACUAAC	15	10		NA	NA	NA	No	YES	No	No	No	NA	NA
III	2380337	2380415	79	-1	SPCC1827.03c	SPCC1827.03c.1:five_prime_UTR:2-SPCC1827.03c.1:exon:1	int_5345	8	3	5	0	0	2	1	2	A	UUGACUAACAU	11	8	dbr1_1;dbr1_2	9	4	3.92969	3.75584	1.11111	1	2.92231	2.14374	GTACGTTATTTTAATGAAGCAATAAAAGATTTAATCACTTAATTCAACACTCACTTTACATTTGACTAACATATACAAG	GACUAAC	GACUAAC	11	8		NA	NA	NA	No	YES	No	No	No	NA	NA
II	1248607	1248691	85	1	SPBC651.07	SPBC651.07.1:exon:1-SPBC651.07.1:exon:2	int_2595	36	23	13	0	0	23	2	2	A;A	UUUUCUAACUA;UUUUUCUAACU	13;14	32;4	dbr1_1;dbr1_2	2	4	5.65259	5.54331	0.428571	1.66667	2.91605	4.20787	GTACGTTCCTCAATAAATGTTGCTGTACGGACATTGCCGTAACAAATTCAGTCAGTCAGATATATTTTTCTAACTAAAATTGAAG	UUCUAAC	UUCUAAC	13	32		NA	NA	NA	No	YES	No	No	No	NA	NA
II	2483638	2483702	65	-1	SPBC17F3.02	SPBC17F3.02.1:exon:3-SPBC17F3.02.1:exon:2	int_3873	5	3	2	0	0	5	1	2	A	AUUAUUAACAA	11	5	dbr1_1;dbr1_2	12	9	4.35312	4.10436	2.6	5	3.35841	3.53093	GTATGTTTCGTTGCTGATTACTTATAGCCCTTTACCTATTCCACAAAATTATTAACAAAGTTTAG	UGCUGAU	UAUUAAC	11	5		NA	NA	NA	No	No	No	No	No	NA	NA
I	5004695	5004741	47	1	SPAC890.03	SPAC890.03.1:exon:1-SPAC890.03.1:exon:2	int_1045	2	1	1	0	0	2	1	2	A	UUAUCUAAUGA	11	2	dbr1_1;dbr1_2	6	6	4.06882	4.50503	0.7	1.16667	2.63852	2.6673	GTATGTATATGAAAAGAGGGAAATCGTGATTATCTAATGAATGGCAG	AUCUAAU	AUCUAAU	11	2		NA	NA	NA	No	YES	No	No	No	NA	NA
I	1194632	1194710	79	-1	SPAC4C5.02c	SPAC4C5.02c.1:exon:3-SPAC4C5.02c.1:exon:2	int_1394	7	5	2	0	0	6	2	2	A;A	UCUGCUAACUA;AUCUGCUAACU	11;12	5;2	dbr1_1;dbr1_2	37	34	3.15917	1.94848	38	35	4.4286	4.77164	GTAAGTAATAGTGGCACAGTAATTTTGCCATATATTTTTACTCAGACTTTATTTTCGAATATCTGCTAACTACTTATAG	UGCUAAC	UGCUAAC	11	5		NA	NA	NA	No	YES	No	No	No	NA	NA
I	686825	686988	164	1	SPAC22F3.09c	SPAC22F3.09c.1:exon:1-SPAC22F3.09c.1:exon:2	int_115	20	9	11	0	0	15	2	2	A;A	GGUAUUAACCA;CGGUAUUAACC	12;13	19;1	dbr1_1;dbr1_2	5	1	5.55709	6.25226	1.2	2	3.48386	3.08234	GTAAGTTGTCTACTGTTACGCGTTGTGACATGATTTGCTATCTTTGAACAACGCGAACAATTGAGTGTTTACTAAGCCAAATCGAGGTATTTTAATACCTTTTTGTATTAAATATCTCTATGGACGCGTCCTCTAAATGATTGACGGTATTAACCAAACTATAG	UAUUAAC	UAUUAAC	12	19		NA	NA	NA	No	YES	No	No	No	NA	NA
III	469136	469244	109	-1	SPCC4G3.02	SPCC4G3.02.1:exon:4-SPCC4G3.02.1:exon:3	int_4943	22	10	12	0	0	17	2	2	A;A	GAAGCUGACAU;CGUUUUAAUUU	23;35	21;1	dbr1_1;dbr1_2	60	43	3.6517	4.59955	61	11	4.27239	3.82724	GTAAGTACTTTGATAGTCAAGGAATAAATAAAAAAACATATTCCTTTTCACATTCAAAATAAAAAATCGTTTTAATTTAGAAGCTGACATTTTGCTTTTAACTCAATAG	AGCUGAC	AGCUGAC	23	21	UUUUAAU	35	1	NA	No	YES	No	No	No	NA	NA
II	3654284	3654440	157	-1	SPBP8B7.12c	SPBP8B7.12c.1:exon:1-SPBP8B7.12c.1:three_prime_UTR:1	int_4188	43	31	12	0	0	31	2	2	A;A	CUUACUAACCU;UCUUACUAACC	8;9	41;2	dbr1_1;dbr1_2	3	5	10.9024	11.0574	0.8	1.5	6.50766	6.47146	GTATGTTTTTATGAATGTTATAAGCCCAGTGATGCTTTTTTGAATTTCTTCAACGGAGCCGTTTGTCTTATTGACATGCGATGTGGGACGATATTTGACATACTGAGGGCCAATCATTCATTTTTCTGACTTCATAATTTTTCTTACTAACCTTTAG	UACUAAC	UACUAAC	8	41		NA	NA	NA	No	YES	No	No	No	NA	NA
II	1361511	1361663	153	-1	SPBC8D2.02c	SPBC8D2.02c.1:five_prime_UTR:2-SPBC8D2.02c.1:exon:3	int_3647	3	2	1	0	0	3	1	2	A	UUAGCUAACCU	12	3	dbr1_1;dbr1_2	0	0	8.26276	8.44608	1	1	1.5525	1.84431	GTAAGTTTATAAATTTTACCTTAGTTTGGACATCTGCGTGTTGCCAAATATGACTTTTGTGCCCATAATCCAATGTGTTTCTGAAGCCGTTTGCTGTGATGACCGATAGTTTCCATAAGTTATTTGCTTTCTCTTTAGCTAACCTGATTTTAG	ACCUGAU	AGCUAAC	12	3		NA	NA	NA	No	No	No	No	No	NA	NA
III	1266718	1266820	103	-1	SPCC23B6.01c	SPCC23B6.01c.1:exon:2-SPCC23B6.01c.1:exon:1	int_5135	38	23	15	0	0	26	3	2	A;A;A	AUUGCUAACGA;AAAUGGGAAAU;AAUUGCUAACG	15;24;16	32;4;2	dbr1_1;dbr1_2	103	59	9.46952	9.86268	8.66667	3.75	6.77658	6.42629	GTATGTCGAAAAAGAAGCGCGTCGGAAGCGTTACCGTAGAAAACCGTGAATTGAAGACGAAAAAAGATGAGGAAATGGGAAATTGCTAACGAAGTATGTGTAG	UGCUAAC	UGCUAAC	15	32	AUGGGAA	24	4	NA	No	YES	No	No	No	NA	NA
III	1348239	1348368	130	-1	SPCC338.15	SPCC338.15.1:exon:4-SPCC338.15.1:exon:3	int_5140	5	4	1	0	0	3	2	2	A;A	AGUACUAACGU;GAGUACUAACG	8;9	4;1	dbr1_1;dbr1_2	89	43	4.6569	4.0712	10	14.6667	6.07148	5.48287	GTAAGTTTTTTGTTTGTATTTAAAAAGCCTTTATTGATATTATGTCATAATTTAATTTTAGCAAGTATATTGTTTGAAGCGTACTTGAGCAGCACAATATTTTATCTCTTTCAAGAGTACTAACGTTTAG	UACUAAC	UACUAAC	8	4		NA	NA	NA	No	YES	No	No	No	NA	NA
II	3665138	3665233	96	-1	SPBP8B7.16c	SPBP8B7.16c.1:exon:2-SPBP8B7.16c.1:exon:1	int_4193	12	4	8	0	0	8	2	2	A;A	AAUAUUAACAU;AAUUAAUAUUA	11;15	11;1	dbr1_1;dbr1_2	59	38	3.54541	4.03653	10	13	6.57222	6.11304	GTAAGAATTCACAATTGGGCGTGCCCCTGTTCAGTACAAAATTATTGATACTGATTTACCTTTTTTTTTAAAATAATTAATATTAACATTTTACAG	UACUGAU	UAUUAAC	11	11	UUAAUAU	15	1	NA	No	No	No	No	No	NA	NA
III	2190041	2190561	521	-1	SPCC830.05c	SPCC830.05c.1:exon:2-SPCC830.05c.1:exon:1	int_5308	7	6	1	0	0	6	1	2	A	AUUUCUAACAA	11	7	dbr1_1;dbr1_2	11	12	8.30745	7.97476	0.571429	0.928571	2.96142	2.66049	GTAAGTGCGAACCCGAGAATGTGAAAGATAATGAAAAGTACGAAAAACCTTGGCTTCTTGATGGATTTCGTTGACAAAAATAAACACTCTTTTTAAAGGTGCTTAATCACCGTTTTACAATGTATACGAAGGGTTATGCGGAAAATTATGATTTGAGCGGAGTTGCATCGAATTTCTGAATTTTTTAAACTTGCTAGTTTGTTTGTGTTAAAGTTACTCTTGTAAAGATTAGTAAACTGAGAATTAAAAGTTACTTGAAAAATATTGATGCTCCTTCTTTCACGAATTTTGAGGTTTTTTTTTTTTTTTCAACGGATTCATTGAACCTTTTTAGTTTTTATTCTAAATTTGATTTTACTGAGAAAAGATTGCTACTTCATTATTGTGGCTAATGAATGT…	UUCUAAC	UUCUAAC	11	7		NA	NA	NA	No	YES	No	No	No	NA	NA
III	320756	320963	208	1	SPCC736.05	SPCC736.05.1:exon:1-SPCC736.05.1:exon:2	int_4439	13	7	6	0	0	11	3	2	A;A;A	GAUUCUAAUAU;UGAUUCUAAUA;UUCACUUAUGA	20;21;38	11;1;1	dbr1_1;dbr1_2	3	10	5.08444	5.13678	2	5.5	2.33507	2.78216	GTAAGTATTGTAGTTAATAAGGAAAGATGATAATTTCAAAAAAAAAAGAAGTGATTTTGTTTTACTACAAACAGTACGCTCCCCATCATTTCGCTGATGTGTACTTTTATATTAGTCGATTCACCTAAAATGTGTAAAACATACATACCTTATTTTTTACTATTTCACTTATGAACTGCATGATTCTAATATTTTTTTTCTTTTTCAG	UUCUAAU	UUCUAAU	20	11	CACUUAU	38	1	NA	No	YES	No	No	No	NA	NA
III	343085	343351	267	1	SPCC736.14	SPCC736.14.1:exon:1-SPCC736.14.1:exon:2	int_4443	5	2	3	0	0	5	2	2	A;A	GUUUCUAACUG;GGUUUCUAACU	14;15	4;1	dbr1_1;dbr1_2	0	1	7.4049	7.62202	1	2	2.31556	2.19234	GTAAGCTTTTTACAAATTAATGGAGATAGAAGCTTGCTGTCCAGAAAAATGTAACTGGAATGAAAAGCAAACAAATGGAAATATCGTTGCAACGGCATTAAGGGCACTGTTGATCAATTCCATTGTATTTTACGATTTCAATTAGTTTTACTCATTGCTTTGTGTTTCCGTCACTACTCTTTTCATACCTGTTCTCCCTAGTATTGATGGATCTCACTTCTGTAGTGGGTTATTTTAAGTTTTTAGGTTTCTAACTGATTTATTTAG	AACUGAU	UUCUAAC	14	4		NA	NA	NA	No	No	No	No	No	NA	NA
II	3610893	3611022	130	-1	SPBC16D10.07c	SPBC16D10.07c.1:exon:4-SPBC16D10.07c.1:exon:3	int_4175	5	3	2	0	0	5	2	2	A;A	UUUAUUAACGU;AUUUAUUAACG	10;11	4;1	dbr1_1;dbr1_2	7	3	2.44058	2.64493	8	2	5.26723	4.75169	GTATGCTTACTGATTTATAACTTGCATTACATTAAATTAGCAGATTATTTTTGTTAAATTGCAATAATAATTTGGTCTACTGCATGTTTTGTTTTCTTATGACTTTACCTAGATTTATTAACGTAAATAG	UACUGAU	UAUUAAC	10	4		NA	NA	NA	No	No	No	No	No	NA	NA
[truncated: 676 more rows]
