# Supplementary material for: LaSSO, a strategy for genome-wide mapping of intronic lariats and branch points using RNA-seq
Source: HighWire-hosted journal article supplement (doi:10.1101/gr.166819.113), 2014-04-07
Supplement: Supplemental_Table6.xlsx [file Supplemental_Table6.xlsx]

## Sheet: Sheet1
Supplemental Table 6. Validation of 23 lariats by lariat-specific RT-PCR, followed by Sanger sequencing
Product sequence: expected lariat sequence
Sequencing results: observed lariat sequence
Key:	Validated
	Failed
ID	ACC	sur_exons	LarReads	Forward	Reverse	size	bp	Product sequence	Sequencing result (using reverse primer)
SPMIT.01	int_5359	SPMIT.01.1:exon:1-SPMIT.01.1:exon:2	35	TTCCCGAGGATCACAACATC	CAGGCGAATTTTCCCCAAGT	217	87	TTCCCGAGGATCACAACATCCAAAGGATAAATAAAATAAGTTCAAGGTATAGTCCGATCAAGATTGAGAAATCTTGTTAACTAAAATTTTAAAGCCGCAGACAAAATTGTCTGAAAACTCTTCTCGATGCGAAAAAGTCCTCTACTCGGAAGTAATTACTCAGTTAATTTATTTTTTAACTAGTAAAAAGATTACTAACTTGGGGAAAATTCGCCTG	AAAAATAAATTAACTGAGTAATTACTTCCGAGTAGAGGACTTTTTCGCATCGAGAAGAGTTTTCAGACAATTTTGTCTGCGGCTTTAAAATTTTAGTTAACAAGATTTCTCAATCTTGATCGGACTATACCTTGAACTTATTTTATTTATCCTTTGGATGTTGTGATCCTCGGGAA
SPMIT.05	int_5361	SPMIT.05.1:exon:1-SPMIT.05.1:exon:2	181	TGGCAAAAGCAAACAGAAAACA	GGTTTCCCCAGCTACCTAAGT	288	193	TGGCAAAAGCAAACAGAAAACAAATTCCATTATGTAGATCTTGTCACATGAAACTTCATGCTAATAAGTTAACTCTTAATGAGGATAAAAAAGTTTAGATATCTTAAATGTAGTGGAGAGCCGTATAATTACGAAAGTATCCCGTACGGTTCGGTGACGAGCCGTGTCAACCCTGCAAAGGGAATGCGTCTTATTGCGCCGTTGTGGTATATATGTGTACCCTCATAGAGAAAGGGATATCTTGTGTGTAAAGATATGAACAATACACTTAGGTAGCTGGGGAAACC	GATATCCCTTTCTCTATGAGGGTACACATATATACCACAACGGCGCAATAAGACGCATTCCCTTTGCAGGGTTGACACGGCTCGTCACCGAACCGTACGGGATACTTTCGTAATTATACGGCTCTCCACTACATTTAAGATATCTAAACTTTTTTATCCTCATTAAGAGTTAACTTATTAGCATGAAGTTTCATGTGACAAGATCTACATAATGGAATTTGTTTTCTGTTTGCTTTTGCCA
SPAC4D7.05	int_1113	SPAC4D7.05.1:exon:2-SPAC4D7.05.1:exon:3	804	ACCTCACTTCACTTCCTCGT	AACCATCTGCAATCGGACGA	257	152	ACCTCACTTCACTTCCTCGTGGAAAGCATTTAAACTTCTTTTAAATCCTTTTCCTTCTTCTTGATGCCTCAAATCCAACTAGATCATCTGTTCCTTTTCCAATGGTTACTAGTACGTGAAAATTGGTGGTGATGTATGTTGGATTAAGACATCTAAAGGTATACGGATTATGGAAGTATAAGGAAACACGAATAATGAAACATATCATGACTCTAATAAATGTATTTTTTTTATTAGTCGTCCGATTGCAGATGGTT	TATGTTTCATTATTCGTGTTTCCTTATACTTCCATAATCCGTATACCTTTAGATGTCTTAATCCAACATACATCACCACCAATTTTCACGTACTAGTAACCATTGGAAAAGGAACAGATGATCTAGTTGGATTTGAGGCATCAAGAAGAAGGAAAAGGATTTAAAAGAAGTTTAAATGCTTTCCACGAGGAAGTGAAGTGAGGT
SPBC409.15	int_2576	SPBC409.15.1:exon:1-SPBC409.15.1:exon:2	104	ACACATATTGCGTTCTGTTGTCT	ACGAATCTTCAGTCTCAAGCA	171	85	ACACATATTGCGTTCTGTTGTCTATATTAAAAATTTTTTACTTCTATTAGCATTTAAAATAATTATCAAGTGATACGTCTATTAAGTAAGTATTCACCAATACTAAATTAGGTAAAGATTTTTTTCAAACAAGAAAGAACGTAACAAGCTTGCTTGAGACTGAAGATTCGT	AAAATCTTTACCTAATTTAGTATTGGTGAATACTTACTTAATAGACGTATCACTTGATAATTATTTTAAATGCTAATAGAAGTAAAAAATTTTTAATATAGACAACAGAACGCAATATGTGT
SPBC649.02	int_2442	SPBC649.02.1:exon:1-SPBC649.02.1:exon:2	1082	ACGTGTGAAATTGACAGTGAACT	ACCAAAAGTTCCCATTAACAGC	114	76	ACGTGTGAAATTGACAGTGAACTTGTAGCTTATTAACATTTACTCACTCATTTCTTTCTATAAAGCAAGTTTCTAAGTAGGTAGAAGATTGAGCTGTTAATGGGAACTTTTGGT	TACTCACTCATTTCTTTCTATAAAGCAAGTTTCTAAGTAGGTAGAAGATTGAGCTGTTAATGGGAACTTTTGGT
SPCC663.03	int_4708	SPCC663.03.1:five_prime_UTR:1-SPCC663.03.1:exon:1	68	TCCATTCACGTTCTTCTCCCT	CCAAGCAGCATCTCAATCGT	219	72	TCCATTCACGTTCTTCTCCCTTTTAGCCTTTTTTATCCATAATTGATGACTTGTTATTTGAACGACTTCTAAGTAAGTGTTGTGTGTGTGGATGGATTGAACAAGGAACGATGATGCGAATTGGCAAAATGGTAACATGGCAATATTATTATTGTCTCAGCTCTAATAGTCTGTCTTTACAAGTTGGATGAGAAGGAGAACGATTGAGATGCTGCTTGG	TATTAGAGCTGAGACAATAATAATATTGCCATGTTACCATTTTGCCAATTCGCATCATCGTTCCTTGTTCAATCCATCCACACACACAACACTTACTTAGAAGTCGTTCAAATAACAAGTCATCAATTATGGATAAAAAAGGCTAAAAGGGAGAAGAACGTGAATGGA
SPCC1450.15	int_4718	SPCC1450.15.1:exon:1-SPCC1450.15.1:exon:2	87	AGTTGGGATAGAAGCAATGACT	TGGATGTGAGATGAAGCAATGT	250	126	AGTTGGGATAGAAGCAATGACTTGTACGTTTATCAAAAATACTTTGCAATCTAATTTTGGATATTTCTTAACATCTTGTCACTCTGTAACTCGTTTATCTCTTTTGAAGTGTTGGAAATGGACTAAGTATGTTTTATTTTACAGATGGGCGAGGTGTCCAGGTTGGAGATGTACGGAACGGATATGAGTAACCAGGGTTGCCTTTAAAGATTTATAAAAACAATATTTACATTGCTTCATCTCACATCCA	TATCCGTTCCGTACATCTCCAACCTGGACACCTCGCCCATCTGTAAAATAAAACATACTTAGTCCATTTCCAACACTTCAAAAGAGATAAACGAGTTACAGAGTGACAAGATGTTAAGAAATATCCAAAATTAGATTGCAAAGTATTTTTGATAAACGTACAAGTCATTGCTTCTATCCC
SPAC22H12.02	int_185	SPAC22H12.02.1:exon:1-SPAC22H12.02.1:exon:2	1082	CAGGATGCTCGTACAATTGAATT	GCACCTAACCTTGACCATTGG	157	86	CAGGATGCTCGTACAATTGAATTTAGAAGAACAATAAAAAACAAAACTTTTTCTTGCAAGTATCTTGATGAACTTTGAACTTACAAGTATGAAAGCCATCTGATTCATTTGCTACGACCGAGGCGCGTTATTTGACCCAATGGTCAAGGTTAGGTGC	GCAAATGAATCAGATGGCTTTCATACTTGTAAGTTCAAAGTTCATCAAGATACTTGCAAGAAAAAGTTTTGTTTTTTATTGTTCTTCTAAATTCAATTGTACGAGCATCCT
SPCC16C4.03	int_4512	SPCC16C4.03.1:exon:1-SPCC16C4.03.1:exon:2	149	GATAAGCTCTTGTTGGTTTGCC	GCACCACCATATACTGTCGG	123	62	GATAAGCTCTTGTTGGTTTGCCAAGTGTAGTCTGATTTTCAACTGGAACGATTTTTACTAAGTATGTATTTTGATATACTGTAATTAAATACGAGTCGCAAGACCGACAGTATATGGTGGTGC	TACAGTATATCAAAATACATACTTAGTAAAAATCGTTCCAGTTGAAAATCAGACTACACTTGGCAAACCAACAAGAGCT
SPBC29B5.01	int_2694	SPBC29B5.01.1:five_prime_UTR:1-SPBC29B5.01.1:exon:1	493	ACTTGACTATTACCTTTGCGAGT	AGCGTCATACTCGTCATGTT	274	107	ACTTGACTATTACCTTTGCGAGTTTTTTTTTACCCTTTGTAGAATATCTTCCTTCACAATCTTGCATATCTAGTCTTCTAGCTTTGCCTGTACAGACATCTAACTAAGTATGTGTTTATACATGCAATTGTGAAGTTTGATTATGTAAAAGGCTGTAAAATTGGAAGAGCGTGATAAAAACGTGACGGGTTGTGTTGAAAACCGAATTTTTATGAAAATTTGAAAATTTGCTCCTATCGTCATTGACCCTACTAAACATGACGAGTATGACGCT	GGAGCAAATTTTCAAATTTTCATAAAAATTCGGTTTTCAACACAACCCGTCACGTTTTTATCACGCTCTTCCAATTTTACAGCCTTTTACATAATCAAACTTCACAATTGCATGTATAAACACATACTTAGTTAGATGTCTGTACAGGCAAAGCTAGAAGACTAGATATGCAAGATTGTGAAGGAAGATATTCTACAAAGGGTAAAAAAAAACTCGCAAAGG
SPBC1271.12	int_3416	SPBC1271.12.1:exon:4-SPBC1271.12.1:exon:3	25	ACTTTACTGCATCCATCCCCT	ACGAGCGATAAAGACCCGAA	117	48	ACTTTACTGCATCCATCCCCTTATTTGTCATATCTTTTTAGTTTCTAAGTAAGGATATACCATTAATGATAGTCGGAAGGATTTCGTGAAACAGTAATTCGGGTCTTTATCGCTCGT	GACTATCATTAATGGTATATCCTTACTTAGAAACTAAAAAGATATGACAAATAAGGGGATGGATGCA
SPAC23C4.08	int_237	SPAC23C4.08.1:exon:2-SPAC23C4.08.1:exon:3	46	CCATACAGTCACACTCGTACA	GGGCATTCTCGTTTTCCTCA	300	134	CCATACAGTCACACTCGTACAATTTCTCATGACCAAACGTCAAATTGCTTTTACTATGCTTGACCTGTTAAGGGTTTTCACCACTTCTTTACATGATTATCTTCTTGTACTTAAAAACTTTTTCCGTTATCTAAGTAAGTATCATTAATAGTGCAAAGCTGTAAACGGCGGAGCGGAAATGAGGTTACCGTCTGCAATATCAAGTATAACTCAATATGAAGCATCTTTTTTTGCAAACCTTTTATCTAACGGGTTAATTTGTGGAAATTTGTTTCATTTCTGAGGAAAACGAGAATGCCC	AACCCGTTAGATAAAAGGTTTGCAAAAAAAGATGCTTCATATTGAGTTATACTTGATATTGCAGACGGTAACCTCATTTCCGCTCCGCCGTTTACAGCTTTGCACTATTAATGATACTTACTTAGATAACGGAAAAAGTTTTTAAGTACAAGAAGATAATCATGTAAAGAAGTGGTGAAAACCCTTAACAGGTCAAGCATAGTAAAAGCAATTTGACGTTTGGTCATGAGAAATTGTACGAGTGTGACTGTA
SPAC607.03c	int_1601	SPAC607.03c.1:exon:2-SPAC607.03c.1:exon:1	195	CGTCGGCAATTTTATTACGGA	AGCATTTGAAACTAGCATGCTT	136	65	CGTCGGCAATTTTATTACGGAAAATGAACTTTTCCGAAATTTATATTCGTTTTATTGCATACTAAGTATGTTAATAATGGTATAAGACTTCTTCTTTGGCTACGAAATAGCTGAAAGCATGCTAGTTTCAAATGCT	TCTTATACCATTATTAACATACTTAGTATGCAATAAAACGAATATAAATTTCGGAAAAGTTCATTTTCCGTAATAAAATTGCC
SPAC14C4.14	int_1087	SPAC14C4.14.1:exon:2-SPAC14C4.14.1:exon:3	232	TGCTTCATTACACTTTTGCAACG	CGTCAACATCATTCCTCAAGTGA	194	121	TGCTTCATTACACTTTTGCAACGTTTCATCTATTACTACCTTAATATTTTTTTTCACAGCCATATCTTTCCGTGCCTATATGTAGCGCTTGCTTTTGCTAAGTATGTCAACAAGTTGTGGTTTGAATGCTGTGAAAAGGAATAAGTGTAGTGATTTAGATTTCCCACCTACTCACTTGAGGAATGATGTTGACG	CTACACTTATTCCTTTTCACAGCATTCAAACCACAACTTGTTGACATACTTAGCAAAAGCAAGCGCTACATATAGGCACGGAAAGATATGGCTGTGAAAAAAAATATTAAGGTAGTAATAGATGAAACGTTGCAAAAGTGTAATGAA
SPAC105.01c	int_1541	SPAC105.01c.1:exon:3-SPAC105.01c.1:exon:2	21	GGGCAGTATTTCTTATCACTCGA	TGACAACTTTCTTATCGTGCCA	159	70	GGGCAGTATTTCTTATCACTCGAAAAAGAGAAGCTTCCTGTACCTACTTTTTGGTTTCTATAGTTGTTAAGTAAGTGATATCGGAAGTAAGAAAGAAGCTTTTAAAAAGTTAATAGATGTTTTATAATTTCTCAGATTGGCACGATAAGAAAGTTGTCA	TTTTTAAAAGCTTCTTTCTTACTTCCGATATCACTTACTTAACAACTATAGAAACCAAAAAGTAGGTACAGGAAGCTTCTCTTTTTCGAGTGATAAGAAATACTGC
SPBC530.04	int_2501	SPBC530.04.1:exon:1-SPBC530.04.1:exon:2	45	GGAGCCTTTCTTTCCGAGTAC	GCGTACAGGTGCAACTTTCA	135	58	GGAGCCTTTCTTTCCGAGTACTACCCTATCTTGCCTGTTTGAAATAATGATTTGCTAAGTATGCTAATTTTTTAAGAAGATCAGAGGTAGTTTCTCTTATTCTTTATGTAAGACATGAAAGTTGCACCTGTACGC	PCR Failed
SPBC17A3.08	int_2651	SPBC17A3.08.1:exon:2-SPBC17A3.08.1:exon:3	10	AGTGTTGAAATGAGCCTAATCCA	GCCACAAGCGAATGAGTTGA	135	45	AGTGTTGAAATGAGCCTAATCCAAATTTTTTTATCAGCCTACTAAGTAAGTATATCTCACAATTCATTTCTTATTTTATTTTACTAGTATAAAAATTGCTTAAACTGTTTACTACTCAACTCATTCGCTTGTGGC	ATTTTTATACTAGTAAAATAAAATAAGAAATGAATTGTGAGATATACTTACTTAGTAGGCTGATAAAAAAATTTGGATTAGGCTCATTTCAACAC
SPAC977.18	int_1136	SPAC977.18.1:exon:2-SPAC977.18.1:exon:1	5	TTCCAGCAATCTTCTTCCTGT	ACTAATCGCTTCCAACAACTGT	150	56	TTCCAGCAATCTTCTTCCTGTTCTCTTTTTATCCGTTTGACAACACATTTTGCTAAGTATGAAATTAGTGAAAGAGAATTAAATCATGCTGTTTGGGGACAATATTAAAATGGTGAAGTTATAATGAAACAGTTGTTGGAAGCGATTAGT	TTGAAAAGATCATTATTGTAGGAAATAGTCAGCTAAGTATGATACTTTGTTAATCGGCCTTCTTTTTTTTTTTTAACAAAGATAGGTGACTCAGGGCAAAAGGGCTTACA
SPAC22F3.05c_int_4_5	skip1	SPAC22F3.05c_int_4_5	5	TTTCCGGCGCACTTTCATC	CGTCAGACTTATTAGCGAGAACC	149	65	TTTCCGGCGCACTTTCATCCGAAGAAATTAGCAAAGTCAGTTTACAATTTATGAATCCAAGCTAAGTAGGCTGAAAATGTGAATTATCTTAACATGCATATAGAAACTTTTGTTTACTTCAATTTTGGTTCTCGCTAATAAGTCTGACG	ATGTTAAGATAATTCACATTTTCAGCCTACTTAGCTTGGATTCATAAATTGTAAACTGACTTTGCTAATTTCTTCGGATGAAAGTGCGCCGGAAA
SPAC8C9.05_int_2_3	skip2	SPAC8C9.05_int_2_3	4	TCGTGCAAGCAATTTCTTCGA	GCTCACCTGAACCTACTCCC	164	80	TCGTGCAAGCAATTTCTTCGAATGATTAATAACTCGTTTTTGGCTTGTCTTCAAGTTGTCCGTTGTAACCCTTTCTCTAAGTAAGACAACAATTGTAACCCGTAATTCGTTGACTTCTAATCCGCCCAGTTACTGTATACTTTTGGGAGTAGGTTCAGGTGAGC	TTTTTGGCTTGTCTTCAAGTTGTCCGTTGTAACCCTTTCTCTAAGTAAGACAACAATTGTAACCCGTAATTCGTTGACTTCTAATCCGCCCAGTTACTGTATACTTTTGGGAGTAGGTTCAGGTGAGC
SPAC26A3.05_int_1_2	skip3	SPAC26A3.05_int_1_2	3	TGCAAATGTAACCCTTGAATCTG	CGAAAGAAGACGGTTGAATTCC	151	77	TGCAAATGTAACCCTTGAATCTGACAAATATGTTTGGTAAGTATATTTTATCGGCACTTTTATTACTTGTTTGCTAAGTAGGTTTTTAATGTTGTTAATAAACGCTAATGCTTGTAGCTCGCATCCGTAGGAATTCAACCGTCTTCTTTCG	TTAGCGTTTATTAACAACATTAAAAACCTACTTAGCAAACAAGTAATAAAAGTGCCGATAAAATATACTTACCAAACATATTTGTCAGATTCAAGGGTTACATTTG
SPAC1834.07_int_1_2	skip4	SPAC1834.07_int_1_2	3	CGCTCGTTTTGACGCTTCAT	CATTCTGAGTGCTAGAAGGATGA	213	96	CGCTCGTTTTGACGCTTCATTTGAAACGAATTGCCATTTTAATACATTGTTCGAATCACATTCAAGTTGTTCTGAATTTCATTAAATATGTACTAAGTAGGTTTCAACAATTGATCTTTACTTTAGAATTCGGCTGACATGATTAAAAGACTAGTGATTACTCAGGAAACTTTGTATTCGATCGTGTTTTTCATCCTTCTAGCACTCAGAATG	GTTTCCTGAGTAATCACTAGTCTTTTAATCATGTCAGCCGAATTCTAAAGTAAAGATCAATTGTTGAAACCTACTTAGTACATATTTAATGAAATTCAGAACAACTTGAATGTGATTCGAACAATGTATTAAAATGGCAATTCGTTTCAAATGAAGCGTCAAAAC
SPAC23C4.17_int_1_2	skip5	SPAC23C4.17_int_1_2	2	CGGGGTTTAAAGCTTTATTGGG	TTGTAAGCCCTTTTGCCCTG	151	76	CGGGGTTTAAAGCTTTATTGGGATATTTTTAAGAAATACATTGAAAAGATCATTATTGTAGGAAATAGTCAGCTAAGTATGATACTTTGTTAATCGGCCTTCTTTTTTTTTTTTAACAAAGATAGGTGACTCAGGGCAAAAGGGCTTACAA	Sanger Sequencing failed
