# Supplementary material for: LaSSO, a strategy for genome-wide mapping of intronic lariats and branch points using RNA-seq
Source: HighWire-hosted journal article supplement (doi:10.1101/gr.166819.113), 2014-04-07
Supplement: Supplemental_Table7.xlsx [file Supplemental_Table7.xlsx]

## Sheet: Supplementary Table 7
Supplemental Table 7. Branch sites identified by LaSSO using 2D-Lariat-Seq dataset from Awan et al., (2013)
Branch-point index: distance of branch-point from 3' splice acceptor site
BP: Branch-point; BS: Branch-site; Lar: Lariat; SplEff: Splicing Efficiency; Int_seq: Intron sequence; sur_exons: flanking exons
Chromosome	start	end	width	strand	gene	sur_exons	int_id	LarReads	Awan_Short	Awan_Long	LarReads_wt_1	LarReads_wt_2	LarSeq	NoBranches	NoSamples	BranchpointLetters	BranchSites	BranchPointIdx	BranchPointReads	Samples	JunctionReadsDbr1_1	JunctionReadsDbr1_2	IntronicExpressDbr1_1	IntronicExpressDbr1_2	SplEffDbr1_1	SplEffDbr1_2	ExonicExpDbr1_1	ExonicExpDbr1_2	Int_seq	FELINES_BS	PrimaryBS_Seq_2DLarSeq	PrimaryBP_idx_2DLarSeq	PrimaryBP_reads_2DLarSeq	SecondaryBS_Seq_2DLarSeq	SecondaryBP_idx_2DLarSeq	SecondaryBP_reads_2DLarSeq	AdditionalBP_2DLarSeq	SecondaryBS_CloserTo3PrimeEnd	LaSSO_FELINES_Agree	PrimaryBranchDifferentFromConsensus_2DLarSeq	SecondaryBranchDifferentFromConsensus_2DLarSeq	BranchDifferentFromConsensus_FELINES	AwanEtAl_AwanEtAl_Acc	AwanEtAl_BranchSites	AwanEtAl_BranchSiteIdx	AwanEtAl_BranchPointReads	IntronDetected_AwanEtAl	AwanEtAl_AgreeWithLaSSO
I	3798227	3798347	121	-1	SPAC1556.02c	SPAC1556.02c.1:exon:2-SPAC1556.02c.1:exon:1	int_1994	86	82	4	0	0	56	5	2	A;A;A;A;A	UUUUCUAAACA;CAAUCUAACAA;GUUUUCUAAAC;ACAAUCUAACA;AUUUUUAAGCA	18;9;19;10;60	42;23;19;1;1	Awan_Short;Awan_Long	22	16	6.87869	7.03384	3.28571	2.83333	3.61959	3.64292	GTATGTTTTTTTTTAGTGACTCGTCTTATTTTTGGAAGCGGTGCAAATTTTATGATTTTTAAGCAACCCTTCTTTGTTTCTCTACTCTATGAACAGTTTTCTAAACAATCTAACAATGTAG	AUCUAAC	UUCUAAA	18	42	AUCUAAC	9	23	NA	YES	No	YES	No	No	SPAC1556.02c_intron1	AUCUAAC;UUCUAAA	7;16	1;3	YES	No
III	1266544	1266670	127	-1	SPCC23B6.01c	SPCC23B6.01c.1:exon:3-SPCC23B6.01c.1:exon:2	int_5134	873	852	21	0	0	125	6	2	A;A;A;A;A;A	GAUCUUAACGA;UGAUCUUAACG;AAGUUUAAUUU;AUGAUUGAUCU;AGAUGCGACAA;AAACACUACAA	16;17;40;22;61;82	823;45;2;1;1;1	Awan_Short;Awan_Long	45	34	10.8264	10.6716	2.875	2.05882	5.86734	5.75476	GTAGGTACAGATAGAAAAGGCCTTTTTGAGTTGGTGACAAACACTACAATGGCTAATGGAGATGCGACAACTTTGATATGAAGTTTAATTTTGTTGGAATGATTGATCTTAACGAATTTTTATTTAG	GGCUAAU	UCUUAAC	16	823	GUUUAAU	40	2	NA	No	No	No	No	No	SPCC23B6.01c_intron2	UCUUAAC;AUCUUAA;GUUUAAU	14;15;38	184;4;1	YES	No
I	4752035	4752157	123	-1	SPAPYUG7.04c	SPAPYUG7.04c.1:exon:3-SPAPYUG7.04c.1:exon:2	int_2210	139	127	12	0	0	32	3	2	A;A;A	UCAGCUAAUUU;AUCAGCUAAUU;AUAUCUCAUCA	10;11;18	125;11;3	Awan_Short;Awan_Long	71	70	4.6228	4.04671	24	35.5	5.99842	6.2329	GTAAGCTTGTTTTTTTCTCCTACTGGGTTTATTCACTTCAAGAAAAAAATTCGAAGTTCTTTTCGATTACTTTTTTCCTCATCATTTGGAAGTTTTAAATATCTCATCAGCTAATTTGTATAG	AGCUAAU	AGCUAAU	10	125	AUCUCAU	18	3	NA	No	YES	No	No	No	SPAPYUG7.04c_intron2	AGCUAAU;CAGCUAA	8;9	88;3	YES	No
II	676909	677056	148	1	SPBC947.03c	SPBC947.03c.1:exon:1-SPBC947.03c.1:exon:2	int_2461	221	196	25	0	0	46	2	2	A;A	AAAACUAAUAU;CAAAACUAAUA	15;16	203;18	Awan_Short;Awan_Long	29	13	7.12313	7.0277	3.75	7	4.7619	4.61483	GTAAGATTGATATGTGTTCATGAATAGCGCGTCCCTCAAATTCAAGTAAACTTTCGCTGGGTTACTGTTTAAATTGAAAACAAACGTTCCAGCTAGTACCTCTTTCTGTTTTTCACCAATTTCGTCAAAACTAATATAATGAAATCAG	AACUAAU	AACUAAU	15	203		NA	NA	NA	No	YES	No	NA	No	SPBC947.03c_intron1	AACUAAU	13	27	YES	No
II	735289	735383	95	1	SPBC119.10	SPBC119.10.1:five_prime_UTR:1-SPBC119.10.1:exon:1	int_2475	4852	4852	0	0	0	293	5	1	A;A;A;A;A	UUUAGUAACCA;GUUUAGUAACC;UUUGUUUAGUA;UUUUAUUAUCU;AACCAUAAAUU	14;15;18;55;8	2955;1856;38;2;1	Awan_Short	163	97	6.95538	6.67487	54.6667	10.8889	9.40141	9.24733	GTAACTATCATTCCAGCTGCGTTGATAAAAATTTTTTATTATCTTCCATTTTTTCCCTCTCCTTCTATTCTTTGTTTAGTAACCATAAATTTTAG	CGUUGAU	UAGUAAC	14	2955	UGUUUAG	18	38	NA	No	No	YES	YES	No	SPBC119.10_intron1	UUAGUAA;UAGUAAC	13;12	12;1218	YES	No
II	754655	754783	129	1	SPBC577.02	SPBC577.02.1:exon:1-SPBC577.02.1:exon:2	int_2485	2024	1970	54	0	0	125	5	2	A;A;A;A;A	UCGACUAAUGC;AUCGACUAAUG;AAUGACCAUCG;ACCAUCGACUA;UCUGUAAAAUA	13;14;21;17;46	1852;167;3;1;1	Awan_Short;Awan_Long	549	526	9.92984	9.98699	5.61224	8.78333	9.38868	9.61875	GTAAGTGAGATAAGTAGAGGTTTCAGCAGCTTATGGAAGAGAAAACTGTTTTCATCTTTCGTTCGTTAAAGTTGTCTCTGTAAAATATATTCAGTGTTAGGAATGACCATCGACTAATGCATGTTTTAG	GACUAAU	GACUAAU	13	1852	UGACCAU	21	3	NA	No	YES	No	YES	No	SPBC577.02_intron1	CGACUAA;GACUAAU	12;11	1;482	YES	No
III	553566	553647	82	1	SPCC962.04	SPCC962.04.1:exon:1-SPCC962.04.1:exon:2	int_4478	1198	1198	0	0	0	158	6	1	A;A;A;A;A;A	UUAACUAACAU;AUUAACUAACA;AUGAUUAACUA;UAUGAUUAACU;AACUAACAUGU;AUUUUGCAUAU	13;14;17;18;11;26	1020;158;16;2;1;1	Awan_Short	1138	1150	5.54149	6.07793	42.1852	33.8529	10.2362	10.5237	GTAAGTTTAAATTTAGCCTGGCGCAGGTGAAAGGCTTTGTTCCTTGTTGATTTTGCATATGATTAACTAACATGTAATTTAG	AACUAAC	AACUAAC	13	1020	GAUUAAC	17	16	NA	No	YES	No	No	No	SPCC962.04_intron1	GAUUAAC;UAACUAA;AACUAAC	15;12;11	3;3;365	YES	No
III	110172	110310	139	-1	SPCC330.03c	SPCC330.03c.1:exon:2-SPCC330.03c.1:exon:1	int_4879	760	297	463	0	0	121	4	2	A;A;A;A	GUUACUAACAC;UGUUACUAACA;UUGUGUUACUA;CAAUGCUAAUU	15;16;19;75	596;162;1;1	Awan_Short;Awan_Long	17	17	8.11918	8.17407	4.5	18	6.22168	6.11043	GTATGAAAAAGTTAAATTTCTGCGCATGGATAATGTTTTGCCTACTCTAAGAAATTTCAATGCTAATTGTATTGAAATGAGATTGATTTGGTCGAAATTTTATTGTTGTTCTATTGTGTTACTAACACCGATGCTTTAG	UACUAAC	UACUAAC	15	596	GUGUUAC	19	1	NA	No	YES	No	YES	No	SPCC330.03c_intron1	UACUAAC;UUACUAA	13;14	112;3	YES	No
II	2181000	2181080	81	1	SPBC17G9.07	SPBC17G9.07.1:exon:1-SPBC17G9.07.1:exon:2	int_2812	8237	8237	0	0	0	326	4	1	A;A;A;A	UCAGCUAACGG;AUCAGCUAACG;CAACAUCAGCU;AUUUUUAAUUC	14;15;19;29	6738;1496;2;1	Awan_Short	5301	4678	7.37993	7.49236	294.556	275.235	12.3502	12.3117	GTATGTTTATTTGATGAAGCTTCCCGCTATTTGACCTTTTGGTCTATTTTTAATTCAACATCAGCTAACGGAAATTTATAG	AGCUAAC	AGCUAAC	14	6738	ACAUCAG	19	2	NA	No	YES	No	YES	No	SPBC17G9.07_intron1	CAGCUAA;AGCUAAC	13;12	26;1796	YES	No
III	887556	887641	86	-1	SPCC16A11.10c	SPCC16A11.10c.1:exon:3-SPCC16A11.10c.1:exon:2	int_5067	288	288	0	0	0	79	2	1	A;A	CACUCUAACAU;ACACUCUAACA	11;12	259;29	Awan_Short	419	299	7.10909	7.3125	35	27.2727	9.55544	9.75049	GTATGTCATTTATTTTTTCTCTTCGTTCGCCATAGGCTCGTTAAAATTTTTGTAAAAATTTGCTTCGACACTCTAACATATTTTAG	CUCUAAC	CUCUAAC	11	259		NA	NA	NA	No	YES	No	NA	No	SPCC16A11.10c_intron2	CUCUAAC	9	31	YES	No
II	1770112	1770237	126	1	SPBC18H10.02	SPBC18H10.02.1:exon:1-SPBC18H10.02.1:exon:2	int_2737	814	628	186	0	0	185	13	2	A;A;A;A;A;A;A;A;A;A;A;A;A	UAGACUAACUG;UUAGACUAACU;GGCUGAGAAGU;UUGGCUGAGAA;CAAACUUAGAC;GCUGAGAAGUG;AACUUAGACUA;GAAGUAAACAU;AUUAUGAAGUA;UGAAGGAAUUA;UGAAGUAAACA;AUGAAGUAAAC;GAAGUGAAGGA	14;15;54;56;20;53;18;32;37;44;33;34;48	631;148;6;5;4;4;3;3;3;3;2;1;1	Awan_Short;Awan_Long	63	49	10.0074	10.1324	3.36842	8.33333	6.06114	5.87722	GTATGTGAAATATATAGTGGTAGAAAGCGTGAGAAACTTAACTTTTGTTAAGCAATGCTTGAATTGGCTGAGAAGTGAAGGAATTATGAAGTAAACATTCAAACTTAGACTAACTGTACCATGTAG	GACUAAC	GACUAAC	14	631	GGCUGAG	56	5	NA	No	YES	No	YES	No	SPBC18H10.02_intron1	AACUUAG;AGACUAA;GACUAAC	18;13;12	2;2;196	YES	No
II	1088575	1088689	115	-1	SPBC1734.14c	SPBC1734.14c.1:exon:2-SPBC1734.14c.1:exon:1	int_3599	447	429	18	0	0	87	5	2	A;A;A;A;A	AAUGCUAAUCG;AAAUGCUAAUC;UUCCCCUAAAA;UGAGCAAAUGC;CCCCUAAAACG	13;14;50;19;48	386;56;3;1;1	Awan_Short;Awan_Long	95	74	6.98532	6.84971	7.38462	6.81818	7.81946	7.49582	GTATGATGATATTGTTAAAGAAACTGCCATACTTTGGGAATTCTCTAGGTTCTTTGTTTTCCCCTAAAACGAGACTCTTGTATCTTATTTGAGCAAATGCTAATCGATGAAATAG	UGCUAAU	UGCUAAU	13	386	CCCCUAA	50	3	NA	No	YES	No	YES	No	SPBC1734.14c_intron1	UGCUAAU	11	17	YES	No
II	4009177	4009315	139	-1	SPBC3B9.13c	SPBC3B9.13c.1:exon:2-SPBC3B9.13c.1:exon:1	int_4266	2394	2295	99	0	0	150	7	2	A;A;A;A;A;A;A	AUUAUUAACAG;GAUUAUUAACA;CUACCACAUUA;UCCUACCACAU;AUUACUGAAAU;GGGGAUUAUUA;CGUCAUCAUGU	13;14;63;65;75;17;42	2232;153;3;2;2;1;1	Awan_Short;Awan_Long	1958	1662	11.3795	11.6579	75.3462	57.3448	11.7359	11.6729	GTAAGTTAACACATTTATGGAGGTGCACGCGTTGTACACATAGAGTCATCAAAAATGATTACTGAAATCCTACCACATTAAATAATGACGCGTCATCATGTAGATTTTGCCTAAAGGGGATTATTAACAGTATTTCTAG	UAUUAAC	UAUUAAC	13	2232	ACCACAU	63	3	NA	No	YES	No	YES	No	SPBC3B9.13c_intron1	UAUUAAC;UUAUUAA	11;12	335;1	YES	No
I	956273	956359	87	-1	SPAC222.07c	SPAC222.07c.1:exon:2-SPAC222.07c.1:exon:1	int_1335	63	63	0	0	0	29	2	1	A;A	UAAGCUAAUGU;CUAAGCUAAUG	13;14	61;2	Awan_Short	19	9	4.81518	4.9248	1.42857	0.416667	6.07862	6.07355	GTAGGAATTAATTACAACTGTGTGTATAAAGCAGTTGACGAACTAAAAATATTGGTCATTGACAACCTAAGCTAATGTATTTATTAG	AGCUAAU	AGCUAAU	13	61		NA	NA	NA	No	YES	No	NA	No	SPAC222.07c_intron1	AGCUAAU	11	10	YES	No
I	4705225	4705309	85	-1	SPAC1834.06c	SPAC1834.06c.1:exon:3-SPAC1834.06c.1:exon:2	int_2197	401	401	0	0	0	87	3	1	A;A;A	UUUACUAACUU;AUUUACUAACU;UGCAUUUACUA	11;12;15	334;66;1	Awan_Short	29	20	4.60995	5.0908	30	10.5	3.78377	3.31815	GTACGTATTATCCCCAAATAAAACTTCTGTCGTTGCAATGTTTTTATATACTCCCGCTAGTTTTGCATTTACTAACTTTAATCAG	UACUAAC	UACUAAC	11	334	CAUUUAC	15	1	NA	No	YES	No	No	No	SPAC1834.06c_intron2	UACUAAC;UUACUAA	9;10	117;4	YES	No
III	2208292	2208387	96	-1	SPCC1919.03c	SPCC1919.03c.1:exon:4-SPCC1919.03c.1:exon:3	int_5314	828	828	0	0	0	106	2	1	A;A	CUUGCUAACUU;GCUUGCUAACU	17;18	726;102	Awan_Short	20	15	4.87799	4.63693	21	16	5.9842	5.99694	GTATGAGTTTTTCATGGTGTGCTTTTTTCTATATTTGAGCCTCCCTTTATAGGTTGTTTATCCTGTTTTAAGCTTGCTAACTTTTTCGCCAAATAG	UGCUAAC	UGCUAAC	17	726		NA	NA	NA	No	YES	No	NA	No	SPCC1919.03c_intron3	UGCUAAC;UUGCUAA	15;16	318;5	YES	No
I	311181	311298	118	-1	SPAC18B11.04	SPAC18B11.04.1:exon:3-SPAC18B11.04.1:exon:2	int_1178	503	498	5	0	0	118	4	2	A;A;A;A	GAAUCUAACAA;UGAAUCUAACA;AACGCUGAAUC;AUGUUUAACGC	12;13;18;24	436;64;2;1	Awan_Short;Awan_Long	8	4	5.56966	5.61755	0.6	0.333333	3.33109	2.62291	GTATGACAGCTATCCTAAAAAAATTGATTTTACATCCGCATCATGGTTCTGCAATTTGAATAAGATTCTTAATTGCTGCTAAATTGAATGTTTAACGCTGAATCTAACAAGTATGCAG	AUCUAAC	AUCUAAC	12	436	CGCUGAA	18	2	NA	No	YES	No	YES	No	SPAC18B11.04_intron2	AUCUAAC	10	46	YES	No
I	5018273	5018392	120	1	SPAC890.08	SPAC890.08.1:exon:1-SPAC890.08.1:exon:2	int_1050	4519	4518	1	0	0	233	7	2	A;A;A;A;A;A;A	CCUACUAACUG;UCCUACUAACU;CAGUCCUACUA;GGCUACAAUAU;UGGCUACAAUA;AAAUUUCAGUC;CUUUCUCAAAA	16;17;20;59;60;26;34	3980;526;7;2;2;1;1	Awan_Short;Awan_Long	1249	1022	8.31722	8.32836	178.571	170.5	10.2341	10.1706	GTAAGTAAAAAAATAAGTGAGATTAGTATAAAAGTCTTTATATTTCGTATTCATGGCTACAATATTTCCTCCTTTCTTCCTTTCTCAAAATTTCAGTCCTACTAACTGTATTTTTTATAG	UACUAAC	UACUAAC	16	3980	GUCCUAC	20	7	NA	No	YES	No	YES	No	SPAC890.08_intron1	CUACUAA;UACUAAC	15;14	12;1290	YES	No
I	988569	988747	179	1	SPAC821.05	SPAC821.05.1:exon:2-SPAC821.05.1:exon:3	int_217	75	54	21	0	0	31	5	2	A;A;A;A;A	UUAACUAACUU;UUCGUUCAGNN;UUUAACUAACU;AUUUUUAACUA;UUUUUCGAAAU	12;2;13;16;138	50;18;4;2;1	Awan_Short;Awan_Long	110	68	7.11084	7.29201	111	69	6.84347	6.53316	GTAAGTGTAGTCATTGGAGAATAAGTTTTCCCTATTTTTCGAAATGATAAAACTTGCAATTTTTCTGCATCAAAGATGCAGCTATGCATTTGTCAGCTCAGTAATGCTCTACTTAGTGAAATTTCTTATCAACCACAGTTTCTCTCTTGAAATAATATTTTTAACTAACTTTCGTTCAG	AACUAAC	AACUAAC	12	50	CGUUCAG	2	18	NA	YES	YES	No	YES	No	SPAC821.05_intron2	AACUAAC	10	13	YES	No
III	1231360	1231447	88	-1	SPCC645.03c	SPCC645.03c.1:exon:2-SPCC645.03c.1:exon:1	int_5131	228	228	0	0	0	62	3	1	A;A;A	UCAAUUAACUA;GUCAAUUAACU;AUUGCUGAGCU	14;15;26	193;22;13	Awan_Short	21	12	5.47064	6.5298	7.33333	13	6.22348	6.03113	GTAAGATTTTCTTAATGGCATGACCATGTTTATCGCATGCGTTTTTGCCTGTTGTATTGCTGAGCTGTCAATTAACTAGTTTCTTTAG	AAUUAAC	AAUUAAC	14	193	UGCUGAG	26	13	NA	No	YES	No	YES	No	SPCC645.03c_intron1	AAUUAAC;CAAUUAA	12;13	69;2	YES	No
I	4481013	4481157	145	1	SPAC17C9.11c	SPAC17C9.11c.1:exon:1-SPAC17C9.11c.1:exon:2	int_901	76	69	7	0	0	31	2	2	A;A	UUUAUUAACAA;UUUUAUUAACA	20;21	67;9	Awan_Short;Awan_Long	93	62	6.07822	6.29474	18.8	12.6	3.25473	3.08234	GTATGTATAGATTTTACTCCTTTTACTTTTTGCTGAATGGTTGAAGCGTTCGAATTGTTAACCATCCTTATTATTATAATTCACGAAAACAATAATTTGTTTCACTCGATCCTTTCTTTTTATTAACAACGATTATAAAACATAG	UAUUAAC	UAUUAAC	20	67		NA	NA	NA	No	YES	No	NA	No	SPAC17C9.11c_intron1	UAUUAAC	18	21	YES	No
I	2746336	2746438	103	-1	SPAC6F6.07c	SPAC6F6.07c.1:exon:2-SPAC6F6.07c.1:exon:1	int_1762	2473	2473	0	0	0	154	8	1	A;A;A;A;A;A;A;A	AAUUCUAACUU;CAAUUCUAACU;AAAACUCAAUU;GACAAAAACUC;UGACAAAAACU;CCACAUGACAA;CACCCACAUGA;GAUUGUAAAAA	11;12;18;22;23;28;31;76	2185;275;8;1;1;1;1;1	Awan_Short	3010	2542	11.135	10.868	231.615	423.833	11.4166	11.4509	GTATGTTAAATTTATTCTCTGATTGTAAAAAGGAGCTATAAAATTTTAAGCTATAAAAATTTTTACACCCACATGACAAAAACTCAATTCTAACTTTGAATAG	UUCUAAC	UUCUAAC	11	2185	AACUCAA	18	8	NA	No	YES	No	YES	No	SPAC6F6.07c_intron1	UUCUAAC;AUUCUAA;AACUCAA;ACAAAAA;CCCACAU	9;10;16;21;29	828;18;1;1;1	YES	No
III	1465062	1465157	96	-1	SPCC11E10.07c	SPCC11E10.07c.1:exon:4-SPCC11E10.07c.1:exon:3	int_5149	290	290	0	0	0	73	2	1	A;A	UGUACUAACGU;UUGUACUAACG	11;12	249;41	Awan_Short	25	35	6.73304	7.13762	13	18	4.93243	5.12673	GTACGTAAACGTTGAATCCATTCAGCTTACAATTATTTTTCCCTATGATCTCTCCATTTCCCTGTTAATTTTAAAATTTGTACTAACGTTTTTTAG	UACUAAC	UACUAAC	11	249		NA	NA	NA	No	YES	No	NA	No	SPCC11E10.07c_intron3	UACUAAC;GUACUAA	9;10	82;4	YES	No
I	3974776	3974878	103	1	SPAPB18E9.01	SPAPB18E9.01.1:exon:3-SPAPB18E9.01.1:exon:4	int_834	114	114	0	0	0	37	2	1	A;A	UCUACUAACAA;UUCUACUAACA	15;16	108;6	Awan_Short	77	48	5.5838	5.39019	13	24.5	5.71429	5.70912	GTAGGATTATTTGAATCGTAAATTGCAATAAACACATATAGCGTCGTCGTCTCTTCTTTTCGAGATTTATTTGTTGTAGCTTCTACTAACAACTTTTACTTAG	UACUAAC	UACUAAC	15	108		NA	NA	NA	No	YES	No	NA	No	SPAPB18E9.01_intron3	UACUAAC	13	10	YES	No
II	2933551	2933709	159	1	SPBC1703.10	SPBC1703.10.1:exon:4-SPBC1703.10.1:exon:5	int_2996	646	504	142	0	0	80	2	2	A;A	GAGGCUAAUGC;CGAGGCUAAUG	15;16	605;41	Awan_Short;Awan_Long	108	91	8.53428	8.15693	10.9	7.07692	7.86038	8.13347	GTATGTAATGTGTGAAGTATGGAAAACCAATTTGATTGTCTTCCGTTTTCTGTATATGCGCGTATATGCGTTATAAGGCGTTTGGGGGATATTTTTATGGCGTTTTCTAGTCTTCACATTGTTTCCGACGCGGTTCCGAGGCTAATGCTTGCTTCTTAG	GGCUAAU	GGCUAAU	15	605		NA	NA	NA	No	YES	No	NA	No	SPBC1703.10_intron4	GGCUAAU	13	167	YES	No
III	2408070	2408224	155	-1	SPCP1E11.09c	SPCP1E11.09c.1:exon:2-SPCP1E11.09c.1:exon:1	int_5357	1066	1012	54	0	0	147	10	2	A;A;A;A;A;A;A;A;A;A	UUAGCUAACAA;AUUAGCUAACA;UCAAAUUAGCU;CUUCAAAACAU;GCAUCCGAUCA;UCUUUCAAAUU;CAUCUUCAAAA;UUAUUUAAACG;GAAAGAUACUU;GUAAGUAAAAA	13;14;18;37;49;22;40;59;69;148	913;131;10;5;2;1;1;1;1;1	Awan_Short;Awan_Long	229	160	9.45196	9.49118	10	5.55172	7.9806	8.1199	GTAAGTAAAAAAATATGGATTCGTTAACTGTTTGAGTCGCTGAGCGATTACAATGCCTTAATATTTTCTTAATGAAATTGAAAGATACTTTATTTAAACGCATCCGATCATCTTCAAAACATGTCTTCTTTCAAATTAGCTAACAAAACTTCTAG	AGCUAAC	AGCUAAC	13	913	AAAUUAG	18	10	NA	No	YES	No	YES	No	SPCP1E11.09c_intron1	AGCUAAC	11	229	YES	No
I	2869172	2869264	93	-1	SPAC8F11.09c	SPAC8F11.09c.1:exon:2-SPAC8F11.09c.1:exon:1	int_1806	41	41	0	0	0	24	3	1	A;A;A	UAUAUUAACAU;AGAGGUUAGUA;GUAUAUUAACA	19;28;20	33;6;2	Awan_Short	26	30	4.19388	3.7131	13.5	31	4.65559	4.61483	GTATGATTTAAAACCACTCACAGGCTAGACAGATAGCTTTTTTTTATAAACAATATATAGAGGTTAGTATATTAACATCGTTATGTATAATAG	UAUUAAC	UAUUAAC	19	33	AGGUUAG	28	6	NA	No	YES	No	YES	No	SPAC8F11.09c_intron1	UAUUAAC	17	11	YES	No
II	632143	632247	105	-1	SPBC839.17c	SPBC839.17c.1:exon:4-SPBC839.17c.1:exon:3	int_3502	167	167	0	0	0	48	2	1	A;A	AUUGCUGACAU;CCUUUCCAAAA	17;38	165;2	Awan_Short	25	34	6.82111	6.6673	8.66667	11.6667	4.77141	5.50683	GTATGTGAAATCTACGACGAATTATTCTAGCAAATCAATTTTTATATTGTGTTGTTTTCTCCTTTCCAAAACGAATATTTCATTGCTGACATAACCGTGGGATAG	UGCUGAC	UGCUGAC	17	165	UUUCCAA	38	2	NA	No	YES	No	YES	No	SPBC839.17c_intron3	UGCUGAC	15	96	YES	No
II	2139902	2140016	115	1	SPBC1711.04	SPBC1711.04.1:exon:1-SPBC1711.04.1:exon:2	int_2808	887	887	0	0	0	46	2	1	A;A	UUUAUUAAUUG;UUUUAUUAAUU	14;15	841;46	Awan_Short	66	92	2.53	2.99174	13.4	10.3333	4.47124	5.05016	GTAAGTACCATCTTATTCAAAGATACACCATTACCGTTATAAAATAGAAATGAGGTTTGGCGAAGCCTTCTTCTTTTTGTTTTTTTTCGAAATTTTTATTAATTGAATTTTTCAG	UAUUAAU	UAUUAAU	14	841		NA	NA	NA	No	YES	No	NA	No	SPBC1711.04_intron1	UAUUAAU	12	21	YES	No
II	3385258	3385406	149	-1	SPBC3B8.06	SPBC3B8.06.1:five_prime_UTR:2-SPBC3B8.06.1:exon:1	int_4117	444	263	181	0	0	82	5	2	A;A;A;A;A	GUUAUUAACUC;UGUUAUUAACU;AUGGCAGAAGU;UGAUGGCAGAA;UGGCAGAAGUG	11;12;22;24;21	404;33;3;3;1	Awan_Short;Awan_Long	7	3	7.45552	7.608	4	4	1.88364	1.82753	GTAGGTTAATAGCATCATATTACAAGTTAACACATTTTGATGAGAGAATTTCATGCTATGATACCGGAGCGGATATGTCTGCGCAAAAATCACTCCACTTGATTTGCATATATATCGATGATGGCAGAAGTGTTATTAACTCTTTTTAG	UAUUAAC	UAUUAAC	11	404	AUGGCAG	24	3	NA	No	YES	No	YES	No	SPBC3B8.06_intron1	UAUUAAC;UUAUUAA;GCAGAAG;AUGGCAG	9;10;19;22	54;1;1;1	YES	No
II	4332455	4332540	86	-1	SPBC16C6.03c	SPBC16C6.03c.1:exon:3-SPBC16C6.03c.1:exon:2	int_4334	20	20	0	0	0	13	3	1	A;A;A	UUUACUAACAU;UUUUACUAACA;UCUUUUUACUA	16;17;20	15;4;1	Awan_Short	3	6	2.53418	2.04839	1.33333	3.5	4.10692	4.14976	GTACTTATATTTTCATTTTAGCCATTTAAAATTGGTTATGAAAAATGTGTTTATCCGATTCTTTTTACTAACATTGAACTTTCCAG	UACUAAC	UACUAAC	16	15	UUUUUAC	20	1	NA	No	YES	No	No	No	SPBC16C6.03c_intron2	UACUAAC	14	6	YES	No
III	144676	144837	162	1	SPCC320.11c	SPCC320.11c.1:exon:2-SPCC320.11c.1:exon:3	int_4381	287	236	51	0	0	72	2	2	A;A	CAAGUUAACAU;UCAAGUUAACA	12;13	259;28	Awan_Short;Awan_Long	52	52	6.8905	6.93847	2.78947	4.41667	7.0253	7.08234	GTAAGATTTTTGAATATGGCCACCATTCATTCTACCCCTAATATCAAAAATTACGCTAAAAAATGACCTTTTCAATTGAAACAAATATTTTAGCGCAAATAAAGTGCAGGACGGAGTGATTCTTTTTTTTTATTTAGTTCAATCAAGTTAACATACTTATAG	CCCUAAU	AGUUAAC	12	259		NA	NA	NA	No	No	No	NA	No	SPCC320.11c_intron2	AAGUUAA;AGUUAAC	11;10	4;149	YES	No
II	1591563	1591654	92	1	SPBC28F2.12	SPBC28F2.12.1:exon:5-SPBC28F2.12.1:exon:6	int_2702	829	829	0	0	0	132	4	1	A;A;A;A	AUAGCUAACAC;GAUAGCUAACA;UUUUUUCAGCA;UUUCAGCAACC	11;12;44;41	697;127;4;1	Awan_Short	78	60	5.85192	5.98923	19.75	15.25	6.32658	6.47465	GTATGTGTTACAACTGTTTGGTTTGTTATAAAAACACCTTTTTTTTTCAGCAACCTTCTAAACTCAATAAAAAGATAGCTAACACCTTTCAG	AGCUAAC	AGCUAAC	11	697	UUUUCAG	44	4	NA	No	YES	No	YES	No	SPBC28F2.12_intron5	UAGCUAA;AGCUAAC	10;9	3;202	YES	No
I	4723509	4723637	129	1	SPAC17D4.01	SPAC17D4.01.1:exon:2-SPAC17D4.01.1:exon:3	int_968	505	463	42	0	0	113	5	2	A;A;A;A;A	UUAUCUAACGU;UUUAUCUAACG;GAAAUUUAUCU;GUCUCUAAAUC;UGAAAACAGUC	14;15;19;39;47	440;60;2;2;1	Awan_Short;Awan_Long	273	232	7.86011	8.08443	24.9091	58.25	8.3836	8.53979	GTAAGTAATTGTGCGATTACTGCTCTTCATTATTAGACTTTTGCACAAAACACTTTTAACCATTAGTTATTATGATGAAAACAGTCTCTAAATCCTACGAAATGAAATTTATCTAACGTTAAATACTAG	AUCUAAC	AUCUAAC	14	440	AAUUUAU	19	2	NA	No	YES	No	No	No	SPAC17D4.01_intron2	CUCUAAA;UAUCUAA;AUCUAAC	37;13;12	2;2;87	YES	No
I	3869454	3869547	94	1	SPAC1071.08	SPAC1071.08.1:exon:1-SPAC1071.08.1:exon:2	int_815	386	386	0	0	0	78	3	1	A;A;A	UUUACUAACCA;CUUUACUAACC;UUGCUUUACUA	15;16;19	312;73;1	Awan_Short	340	350	8.12696	8.5221	48.7143	58.5	10.0487	9.96518	GTATGTGAATTGTTAGAGCTACTTTTTAAACTTAGGCGTATGCCATGTTGTTTCTCATTTTGTGTAATTTGCTTTACTAACCAATCATGTGTAG	UACUAAC	UACUAAC	15	312	GCUUUAC	19	1	NA	No	YES	No	No	No	SPAC1071.08_intron1	UUACUAA;UACUAAC	14;13	3;142	YES	No
I	3927885	3927968	84	-1	SPAC2F3.04c	SPAC2F3.04c.1:exon:2-SPAC2F3.04c.1:exon:1	int_2049	18	18	0	0	0	16	2	1	A;A	UUUACUAACCU;AUUUACUAACC	14;15	13;5	Awan_Short	30	25	4.59788	4.59691	7.75	8.66667	6.01679	5.84481	GTACGCAACATTGCAATGGTCCAAGTTGAAGCCTGAAGCAAAATTTGAAAACAGAATATAGTATTTACTAACCTCTCTTATTAG	UACUAAC	UACUAAC	14	13		NA	NA	NA	No	YES	No	NA	No	SPAC2F3.04c_intron1	UACUAAC	12	4	YES	No
III	540377	540566	190	-1	SPCP31B10.08c	SPCP31B10.08c.1:exon:2-SPCP31B10.08c.1:exon:1	int_4976	604	353	251	0	0	93	4	2	A;A;A;A	UUUGCUAACUU;UUUUGCUAACU;UUUUUCCACUU;CUAACUUAUCG	14;15;114;10	470;131;2;1	Awan_Short;Awan_Long	1550	1984	9.35252	9.25036	310.2	496.25	9.87674	10.2652	GTAAGTGAAATTTATATTACAAGAAAAGCAAAGAGAAAAGGAGTTGATCATTGTCTGTACCGGTTGAAGTTTTTCCACTTTCATTTGATTGATTTTCAAACAAAATATATAATTTATTTTGTTATTTCTATAATTTTTCTTGTTTTTATGAGTTATTTCTTCGTTCTATTTTGCTAACTTATCGTTTTAG	UGCUAAC	UGCUAAC	14	470	UUUCCAC	114	2	NA	No	YES	No	YES	No	SPCP31B10.08c_intron1	UGCUAAC;UUGCUAA	12;13	125;6	YES	No
I	3203924	3204067	144	1	SPAC1486.06	SPAC1486.06.1:five_prime_UTR:1-SPAC1486.06.1:exon:1	int_669	335	273	62	0	0	81	8	2	A;A;A;A;A;A;A;A	GACACUAACUU;UGACACUAACU;ACAAUUGACAC;CAUGCGCAUGU;AAUUGACACUA;UUUGACAAUUG;GUUUCACAUCU;CGCAUGUAGUA	11;12;17;59;15;21;33;55	278;46;3;3;2;1;1;1	Awan_Short;Awan_Long	22	15	5.64019	5.6059	23	16	4.0886	4.12888	GTATGCTCGTTTGTTAAAAATAATATAATTTGATTTCCTGCAATTTTGGCGGGTATACTTTTCGAGTCTGCATTATAACATGCGCATGTAGTATAAAATATAATGTTTCACATCTATTTGACAATTGACACTAACTTGAAAAAG	CACUAAC	CACUAAC	11	278	UGCGCAU	59	3	NA	No	YES	No	YES	No	SPAC1486.06_intron1	ACACUAA;CACUAAC	10;9	2;12	YES	No
II	2211006	2211085	80	1	SPBC14C8.04	SPBC14C8.04.1:exon:3-SPBC14C8.04.1:exon:4	int_2815	2336	2336	0	0	0	166	5	1	A;A;A;A;A	UUUAUUAACAU;UUUUAUUAACA;UAUUAACAUUU;UCCAAUUAUAA;UAAAGUAAUUG	12;13;10;56;68	1830;503;1;1;1	Awan_Short	1491	1152	7.56926	7.37328	373	288.25	9.43378	9.21713	GTATGTAAAGTAATTGATCCAATTATAATTGTCACTGACCTTTTTTACTTTCCTTCTAATTTTTATTAACATTTTTTTAG	UUCUAAU	UAUUAAC	12	1830	AAGUAAU	68	1	NA	No	No	No	YES	No	SPBC14C8.04_intron3	UAUUAAC	10	151	YES	No
II	2325119	2325233	115	1	SPBC24C6.04	SPBC24C6.04.1:five_prime_UTR:1-SPBC24C6.04.1:exon:1	int_2861	2272	2272	0	0	0	119	7	1	A;A;A;A;A;A;A	GAUAUUAAUAC;CGAUAUUAAUA;AAUACUUAUUA;UAUUAAUACUU;AUGCGAUAUUA;UUUAUUUAUGC;UGUUUUGAGUG	11;12;5;9;15;22;82	2160;100;8;1;1;1;1	Awan_Short	421	332	5.94785	5.95109	35.1667	30.2727	8.37341	8.19302	GTAAGTATTTATATCTATGTAATAACTGTTTTGAGTGAGACCCCTACGCGTCTTTTCATTGCTTTCTATCTTTAGGTTTTCTACGTTTTATTTATGCGATATTAATACTTATTAG	UAUUAAU	UAUUAAU	11	2160	UACUUAU	5	8	NA	YES	YES	No	No	No	SPBC24C6.04_intron1	AUAUUAA;UAUUAAU;UACUUAU	10;9;3	3;446;3	YES	No
I	4774261	4774366	106	1	SPAC1782.11	SPAC1782.11.1:exon:1-SPAC1782.11.1:exon:2	int_985	293	293	0	0	0	79	6	1	A;A;A;A;A;A	AAGGCUAACCG;UAAGGCUAACC;AUAGAUGACCC;AAAAUUAAGGC;UAAAAUUAAGG;ACCCUAUAAAA	11;12;31;17;18;24	269;18;3;1;1;1	Awan_Short	162	136	5.46774	5.22478	27.1667	19.5714	7.41538	7.38499	GTAGGTAATTGTTACACATTAAAGATACTTTTTCCCCTCAGGAAATTCCATTTTCTCAATGTTTTTAAATAGATGACCCTATAAAATTAAGGCTAACCGGTTTTAG	GGCUAAC	GGCUAAC	11	269	AGAUGAC	31	3	NA	No	YES	No	YES	No	SPAC1782.11_intron1	AGAUGAC;AGGCUAA;GGCUAAC	29;10;9	1;1;122	YES	No
III	93497	93617	121	1	SPCC613.08	SPCC613.08.1:exon:2-SPCC613.08.1:exon:3	int_4373	39	37	2	0	0	30	3	2	A;A;A	UUAGCUAACGG;UUUAGCUAACG;CGAGUGCAAAU	14;15;36	28;10;1	Awan_Short;Awan_Long	42	21	6.05653	5.98684	21.5	22	5.17895	4.47854	GTATGAAATAATAGTTTTTATTTTTTTTGAATTTGCAAGCCCATACAAGGTGGTGATGCATCTGCAATGTTTTACACTCGAGTGCAAATTTTTGGAATCTTTAGCTAACGGTACTTATTAG	AGCUAAC	AGCUAAC	14	28	AGUGCAA	36	1	NA	No	YES	No	YES	No	SPCC613.08_intron2	UAGCUAA;AGCUAAC	13;12	1;9	YES	No
III	748193	748296	104	-1	SPCC14G10.03c	SPCC14G10.03c.1:exon:2-SPCC14G10.03c.1:exon:1	int_5046	154	154	0	0	0	47	2	1	A;A	UUUACUGACUC;UAGUUUUACUG	12;16	152;2	Awan_Short	216	156	6.46946	6.40149	108.5	52.3333	7.78568	7.81026	GTAGGTTATTAATGTATAGACTAATATAGTGCTATATTTACTTATTGTTGCACTTATATCTTCCCCCTCTTTTTTTTTCTTTAGTTTTACTGACTCAAGCATAG	UACUGAC	UACUGAC	12	152	GUUUUAC	16	2	NA	No	YES	No	No	No	SPCC14G10.03c_intron1	UACUGAC	10	37	YES	No
III	815820	815969	150	-1	SPCC1393.09c	SPCC1393.09c.1:exon:4-SPCC1393.09c.1:exon:3	int_5057	583	536	47	0	0	66	8	2	A;A;A;A;A;A;A;A	AUAACUAAUCA;UAUAACUAAUC;UCAUAUAACUA;CAUAUUUAUAA;AUCAUUCAUAU;AUCAUAUAACU;GAUGCAUAUUU;GUAGCUGAGGA	15;16;19;36;8;20;40;98	508;59;8;4;1;1;1;1	Awan_Short;Awan_Long	21	18	7.65248	7.83722	22	19	3.8258	3.46852	GTATGAACCAGTTAAGATACAATCGAAAAGGGAACAAGAATAGAAGTAGCTGAGGATTGCTTTTGTCCACTAGGAAAGCTCTTTCACTGTTTTATTAAGCATTGATGCATATTTATAATTTCCATCATATAACTAATCATTCATATATAG	AACUAAU	AACUAAU	15	508	AUAUAAC	19	8	NA	No	YES	No	YES	No	SPCC1393.09c_intron3	AACUAAU;UAACUAA;AUAUAAC;UAUUUAU	13;14;17;34	51;2;1;1	YES	No
II	2073383	2073466	84	1	SPBC29A3.18	SPBC29A3.18.1:exon:1-SPBC29A3.18.1:exon:2	int_2795	647	647	0	0	0	99	2	1	A;A	AUCAUUAACGG;GAUCAUUAACG	11;12	572;75	Awan_Short	18	8	6.47502	6.58786	3.16667	1.8	3.99697	3.77421	GTAAGTGAAATGTGATGGCTGCTATTCGTGGAAACGGAAGCAAGCATAGCTTTTGACAAAAGAACGATCATTAACGGGGTTTAG	CAUUAAC	CAUUAAC	11	572		NA	NA	NA	No	YES	No	NA	No	SPBC29A3.18_intron1	UCAUUAA;CAUUAAC	10;9	1;183	YES	No
III	2154848	2154999	152	-1	SPCC1620.06c	SPCC1620.06c.1:exon:2-SPCC1620.06c.1:exon:1	int_5300	44	25	19	0	0	29	2	2	A;A	UGAACUAACUA;AUGAACUAACU	19;20	37;7	Awan_Short;Awan_Long	135	109	9.92643	9.77086	6.18182	9.16667	6.5441	6.51398	GTATGAGTTGGTTCGGTAGCTCTACGATAAAATTTGAGGGTTTCGTAGAGCTGGTGAAAAATGTGAAAGAAACGCTCCTGTAGTCTGGGAATTGATGGGCGTTTGGTGAATTTCATGAATAGTTAATGAACTAACTAAAAATTTGTAAATAG	AACUAAC	AACUAAC	19	37		NA	NA	NA	No	YES	No	NA	No	SPCC1620.06c_intron1	AACUAAC	17	3	YES	No
I	3649828	3649938	111	1	SPAC8C9.05	SPAC8C9.05.1:exon:3-SPAC8C9.05.1:exon:4	int_745	275	275	0	0	0	41	2	1	A;A	UUCUCUAAUAA;UUUCUCUAAUA	11;12	252;23	Awan_Short	59	61	7.16603	7.29495	8.57143	3.64706	6.40015	6.74005	GTGAGCATATTTAAAAATCAATCGTGCAAGCAATTTCTTCGAATGATTAATAACTCGTTTTTGGCTTGTCTTCAAGTTGTCCGTTGTAACCCTTTCTCTAATAAAAAACAG	CUCUAAU	CUCUAAU	11	252		NA	NA	NA	No	YES	No	NA	No	SPAC8C9.05_intron3	UCUCUAA;CUCUAAU	10;9	1;23	YES	No
III	2380337	2380415	79	-1	SPCC1827.03c	SPCC1827.03c.1:five_prime_UTR:2-SPCC1827.03c.1:exon:1	int_5345	1168	1168	0	0	0	135	5	1	A;A;A;A;A	UUGACUAACAU;UUUGACUAACA;ACAUUUGACUA;AACACUCACUU;AGCAAUAAAAG	11;12;15;27;55	967;198;1;1;1	Awan_Short	9	4	3.92969	3.75584	1.11111	1	2.92231	2.14374	GTACGTTATTTTAATGAAGCAATAAAAGATTTAATCACTTAATTCAACACTCACTTTACATTTGACTAACATATACAAG	GACUAAC	GACUAAC	11	967	CACUCAC	27	1	NA	No	YES	No	No	No	SPCC1827.03c_intron1	GACUAAC;UGACUAA	9;10	126;1	YES	No
III	1266718	1266820	103	-1	SPCC23B6.01c	SPCC23B6.01c.1:exon:2-SPCC23B6.01c.1:exon:1	int_5135	343	343	0	0	0	106	5	1	A;A;A;A;A	AUUGCUAACGA;AAUUGCUAACG;CGAAAAAAGAU;AAUGGGAAAUU;ACGAAAAAAGA	15;16;39;23;40	305;29;6;2;1	Awan_Short	103	59	9.46952	9.86268	8.66667	3.75	6.77658	6.42629	GTATGTCGAAAAAGAAGCGCGTCGGAAGCGTTACCGTAGAAAACCGTGAATTGAAGACGAAAAAAGATGAGGAAATGGGAAATTGCTAACGAAGTATGTGTAG	UGCUAAC	UGCUAAC	15	305	AAAAAAG	39	6	NA	No	YES	No	YES	No	SPCC23B6.01c_intron1	UGCUAAC;UUGCUAA	13;14	40;3	YES	No
III	188150	188322	173	1	SPCC1235.16	SPCC1235.16.1:exon:1-SPCC1235.16.1:exon:2	int_4395	15	15	0	0	0	12	2	1	A;A	CUUACUAACUU;ACUUACUAACU	13;14	13;2	Awan_Short	5	15	8.08296	8.09995	3	16	3.50979	3.78872	GTAAGTTTATTAATTATTAGTTTATTTCTTTACGCCGGACTGCGAATTGGTTTTAAGAAATTCCATACAACCTTCCACAACAGTCTATAATCTTAGGTCTCTTATATTGTTTATTCCTTTTATATTCTTAACTAAATATGTTGGAAATGAAAACTTACTAACTTTCGTAATAG	UACUAAC	UACUAAC	13	13		NA	NA	NA	No	YES	No	NA	No	SPCC1235.16_intron1	UACUAAC	11	3	YES	No
I	4152346	4152434	89	-1	SPAC26H5.13c	SPAC26H5.13c.1:exon:2-SPAC26H5.13c.1:exon:1	int_2106	263	263	0	0	0	48	2	1	A;A	UGUACUAAUUC;UUGUACUAAUU	9;10	231;32	Awan_Short	13	4	4.35918	4.09846	14	5	3.60511	3.59546	GTATGTCTATTTTTTCCAGCTTTTTTCGATGTTTTAATCATGTATTTGTCATTTGCTCTTTTCTATTTTGATTTGTACTAATTCATTAG	UACUAAU	UACUAAU	9	231		NA	NA	NA	No	YES	No	NA	No	SPAC26H5.13c_intron1	UACUAAU;GUACUAA	7;8	140;3	YES	No
I	2280767	2280859	93	1	SPAC4G9.14	SPAC4G9.14.1:exon:2-SPAC4G9.14.1:exon:3	int_480	152	152	0	0	0	54	2	1	A;A	GAUACUAACAU;AGAUACUAACA	14;15	118;34	Awan_Short	13	13	4.85869	5.12814	14	14	5.90882	5.54129	GTACGTTAAAGGTTTGCATTACTTTGAAACCTTATAAAGTGAACCTTGTTATTTCTCCCTCTTTCTATGCAAGATACTAACATAATTGAACAG	UACUAAC	UACUAAC	14	118		NA	NA	NA	No	YES	No	NA	No	SPAC4G9.14_intron2	AUACUAA;UACUAAC	13;12	1;26	YES	No
I	727902	727986	85	-1	SPAC22G7.01c	SPAC22G7.01c.1:exon:2-SPAC22G7.01c.1:exon:1	int_1274	280	280	0	0	0	73	2	1	A;A	AAUAUUAACAA;GAAUAUUAACA	12;13	266;14	Awan_Short	26	16	6.56601	6.85782	27	17	5.18284	5.0694	GTAAGTAGATAAATTAATATGCTAACTTACATAAATCTCAAGTGAAATAAAGAACCCGCTGAACTGAATATTAACAATTATATAG	UGCUAAC	UAUUAAC	12	266		NA	NA	NA	No	No	No	NA	No	SPAC22G7.01c_intron1	UAUUAAC	10	63	YES	No
II	2030487	2030586	100	-1	SPBP23A10.14c	SPBP23A10.14c.1:exon:3-SPBP23A10.14c.1:exon:2	int_3774	318	318	0	0	0	58	2	1	A;A	UAUGCUAAUAU;UUAUGCUAAUA	16;17	255;63	Awan_Short	13	20	3.31659	3.72388	2.33333	1.5	4.49863	4.03884	GTATGAAAAGAACGACAATAGTATCAACCAATTCTATGGATTGGAAGAAGTTACTTTCAATCTTTCTCTTTTCAAATTATGCTAATATTTGTAAAAATAG	UGCUAAU	UGCUAAU	16	255		NA	NA	NA	No	YES	No	NA	No	SPBP23A10.14c_intron2	UGCUAAU;AUGCUAA	14;15	14;2	YES	No
I	4767608	4767710	103	1	SPAC1782.07	SPAC1782.07.1:exon:3-SPAC1782.07.1:exon:4	int_984	138	138	0	0	0	38	3	1	A;A;A	UUUACUAAUAU;UUUUACUAAUA;UCAUUUUACUA	13;14;17	110;26;2	Awan_Short	48	32	5.66626	5.9808	9.8	3.66667	5.82384	5.37704	GTAAGTTAATGACTGAAGAATCGATAAGCAGCTATGGTTTGCAGCATTTTTCTATACTTCTAAATTGTGTCAATAATTGTCATTTTACTAATATGTGGTTTAG	UACUAAU	UACUAAU	13	110	AUUUUAC	17	2	NA	No	YES	No	No	No	SPAC1782.07_intron3	UUACUAA;UACUAAU	12;11	1;23	YES	No
III	354757	354855	99	1	SPCC594.01	SPCC594.01.1:exon:1-SPCC594.01.1:exon:2	int_4445	612	612	0	0	0	58	3	1	A;A;A	AAUGCUAAUUC;UAAUGCUAAUU;GGUGCUUAAUG	15;16;22	585;22;5	Awan_Short	85	56	5.9653	6.18769	17.2	7.125	4.0513	3.81344	GTAAGTTTTTTAAAAGCATATTCTTTAGTTTTCTTCTTCGTTTTATCTCATTTCGTCTTTTTTTTTCCGCGGTGCTTAATGCTAATTCCTTTTCACTAG	UGCUAAU	UGCUAAU	15	585	UGCUUAA	22	5	NA	No	YES	No	YES	No	SPCC594.01_intron2	UGCUUAA;AUGCUAA;UGCUAAU	20;14;13	1;1;79	YES	No
I	2348615	2348704	90	-1	SPAC17G8.04c	SPAC17G8.04c.1:exon:4-SPAC17G8.04c.1:exon:3	int_1668	766	766	0	0	0	83	3	1	A;A;A	GUCACUAAUAC;GGUCACUAAUA;UUCGGUCACUA	14;15;18	716;49;1	Awan_Short	73	66	6.65182	6.84078	18.5	13.4	5.43891	5.46902	GTAACTTTTAGTTTATTGCTTTTCCCAACGCTCTAGCATTGCTTATCTCATGCTTTACATTTTTATTCGGTCACTAATACGGTTTTGTAG	CACUAAU	CACUAAU	14	716	CGGUCAC	18	1	NA	No	YES	No	YES	No	SPAC17G8.04c_intron3	CACUAAU;UCACUAA	12;13	277;4	YES	No
III	1226397	1226481	85	-1	SPCC4E9.01c	SPCC4E9.01c.1:exon:3-SPCC4E9.01c.1:exon:2	int_5129	178	178	0	0	0	30	3	1	A;A;A	UAAACUAAUUC;GUAAACUAAUU;AACGUAAACUA	8;9;12	156;21;1	Awan_Short	1	2	3.72098	3.78147	2	3	0.581945	-0.0331265	GTAAGTTTAGCAGGAATGATCCGCGACGTTTTCTAGCTTTTGCTGTTTTGTTTACTCTTCCTTTGAAACGTAAACTAATTCATAG	AACUAAU	AACUAAU	8	156	CGUAAAC	12	1	NA	No	YES	No	YES	No	SPCC4E9.01c_intron2	AACUAAU	6	21	YES	No
I	2238905	2239047	143	-1	SPAC18G6.11c	SPAC18G6.11c.1:five_prime_UTR:2-SPAC18G6.11c.1:exon:1	int_1647	996	969	27	0	0	105	4	2	A;A;A;A	GAAACUAACUA;UGAAACUAACU;UUGAAACAGUU;UAUUUCCACAU	12;13;65;54	856;134;5;1	Awan_Short;Awan_Long	3	6	6.02939	5.77421	0.4	0.411765	4.44561	4.70548	GTAAGGAAATGTTTTATTAATAAGAGAGATATAGCAATGTTTGGTTTTTTAAGCAATTGGGTCAACTTGACTTGAAACAGTTTATTTCCACATTTACTTTACTCTTAAGTTTTGGTTTAACTTTGAAACTAACTATTACAAAG	AACUAAC	AACUAAC	12	856	GAAACAG	65	5	NA	No	YES	No	YES	No	SPAC18G6.11c_intron1	AACUAAC;AAACUAA	10;11	106;1	YES	No
I	384350	384479	130	1	SPAC1751.04	SPAC1751.04.1:exon:1-SPAC1751.04.1:exon:2	int_40	34	33	1	0	0	22	2	2	A;A	UUUUCUAACUU;UUUUUCUAACU	17;18	29;5	Awan_Short;Awan_Long	7	4	4.92297	5.0712	1.33333	2.5	3.30247	3.27826	GTATGCTCCTTCTTCCTTCACAATTTACGAACCATGTAAAAGGGGAGTTTCTTTTCTCTTCTTTAAATGTTTCTTTGTTTACTTTTACTGGTAAAATCGAACCCTTTTTTCTAACTTTTTCTTTTTGTAG	UUCUAAC	UUCUAAC	17	29		NA	NA	NA	No	YES	No	NA	No	SPAC1751.04_intron1	UUCUAAC	15	10	YES	No
II	817280	817415	136	-1	SPBC530.11c	SPBC530.11c.1:exon:2-SPBC530.11c.1:exon:1	int_3527	30	23	7	0	0	17	1	2	A	CAUACUGACCU	14	30	Awan_Short;Awan_Long	22	14	6.97802	7.18346	23	15	3.73608	3.41491	GTAAGTCAATACCGACTCGAACTGCTAATGTCGGCATATGGGGAGAAATACAAAATCCACCGATTTACTTTTCTTTCTTTTATTGATGATTTATATGCCTTTTTTTGTTTTTATTCATACTGACCTATTTGGATAG	UACUGAC	UACUGAC	14	30		NA	NA	NA	No	YES	No	NA	No	SPBC530.11c_intron1	UACUGAC	12	14	YES	No
III	1621945	1622031	87	1	SPCC777.13	SPCC777.13.1:exon:5-SPCC777.13.1:exon:6	int_4698	332	332	0	0	0	69	4	1	A;A;A;A	GUUAUUAACUU;UGUUAUUAACU;UCUCAGGACAU;UCAGGACAUAU	12;13;28;26	291;38;2;1	Awan_Short	16	13	5.02	5.39428	3.4	2.8	5.35612	5.34537	GTATGCTCATAAATTTAAATTTCGTTTGTAAAATCCTTTTTTCACATGTTATTCTCAGGACATATGTTGTTATTAACTTTTTTTTAG	UAUUAAC	UAUUAAC	12	291	UCAGGAC	28	2	NA	No	YES	No	YES	No	SPCC777.13_intron5	UAUUAAC	10	63	YES	No
III	1976264	1976347	84	-1	SPCC18.11c	SPCC18.11c.1:exon:2-SPCC18.11c.1:exon:1	int_5259	251	251	0	0	0	78	4	1	A;A;A;A	UUUGCUAACUG;AUUUGCUAACU;AAAAGGGAAAU;UAAAAGAAAAG	13;14;34;40	217;30;2;2	Awan_Short	108	53	6.27779	6.46481	18.1667	9	6.14149	5.96686	GTAAGCAAAATATGAGTTAAAGTTTCAAAAAAGATAGTAAAAGAAAAGGGAAATGATATGGACATTTGCTAACTGATGGAACAG	AACUGAU	UGCUAAC	13	217	AAAGAAA	40	2	NA	No	No	No	YES	No	SPCC18.11c_intron1	UGCUAAC	11	38	YES	No
II	3433006	3433091	86	-1	SPBC4B4.10c	SPBC4B4.10c.1:exon:2-SPBC4B4.10c.1:exon:1	int_4129	10	10	0	0	0	10	1	1	A	UUUGCUCACCA	17	10	Awan_Short	15	9	4.75658	3.24104	2.66667	2.5	4.79464	4.40591	GTATGTGATTTGTTCACTCAAGTAGTAATTTAATATTCTTTAACTCAATTTATTTTTTCCTTTTTGCTCACCATATTCTACCTAAG	CUUUAAC	UGCUCAC	17	10		NA	NA	NA	No	No	No	NA	No	SPBC4B4.10c_intron1	UGCUCAC	15	1	YES	No
III	665069	665213	145	1	SPCC16C4.03	SPCC16C4.03.1:exon:1-SPCC16C4.03.1:exon:2	int_4512	123	85	38	0	0	56	7	2	A;A;A;A;A;A;A	UUUACUAACAC;UAAUUAAAUAC;UUUUACUAACA;GUUUGCCAAGU;GAUUUUUACUA;CAACUGGAACG;UGGUGCCACAC	13;118;14;51;17;27;82	79;21;18;2;1;1;1	Awan_Short;Awan_Long	66	57	8.35545	8.24061	2.57692	3.625	5.95088	5.88635	GTATGTATTTTGATATACTGTAATTAAATACGAGTCGCAAGACCGACAGTATATGGTGGTGCCACACTTGGTGATAAGCTCTTGTTGGTTTGCCAAGTGTAGTCTGATTTTCAACTGGAACGATTTTTACTAACACTATGTGTAG	UACUAAC	UACUAAC	13	79	AUUAAAU	118	21	NA	No	YES	No	YES	No	SPCC16C4.03_intron1	UUACUAA;UACUAAC	12;11	1;20	YES	No
II	3616766	3616876	111	1	SPBC16D10.09	SPBC16D10.09.1:exon:1-SPBC16D10.09.1:exon:2	int_3206	102	102	0	0	0	55	3	1	A;A;A	UUCUCUAACCU;AUUCUCUAACC;AUUUAUUAACU	12;13;35	81;20;1	Awan_Short	124	123	4.48796	4.48759	41.6667	124	4.83862	4.82175	GTATGTAAGGGGCAGCATATAAATAAAGATGCTCAACGACAAAGCCTTTCTTTTTTTTAAAAAAAATATATTTATTAACTTCTTTTGAATGATTCTCTAACCTCATAACAG	CUCUAAC	CUCUAAC	12	81	UUAUUAA	35	1	NA	No	YES	No	YES	No	SPBC16D10.09_intron1	UCUCUAA;CUCUAAC	11;10	2;13	YES	No
I	3731809	3731892	84	1	SPAC15E1.09	SPAC15E1.09.1:exon:3-SPAC15E1.09.1:exon:4	int_786	660	660	0	0	0	72	2	1	A;A	AUUACUAAUAC;UAUUACUAAUA	15;16	561;99	Awan_Short	25	18	5.09169	5.48443	1.13043	1.11765	4.91082	5.05063	GTATGAACCCAAATTTGTTTTCCTTGACCATTAATATTCTCGTTGGTTTTTCTCTGTTGTTTATTACTAATACATTATATAAAG	UACUAAU	UACUAAU	15	561		NA	NA	NA	No	YES	No	NA	No	SPAC15E1.09_intron3	UUACUAA;UACUAAU	14;13	4;300	YES	No
I	3942670	3942774	105	-1	SPAC2F3.18c	SPAC2F3.18c.1:exon:2-SPAC2F3.18c.1:exon:1	int_2052	100	100	0	0	0	55	2	1	A;A	UAUUCUAACGA;UUAUUCUAACG	16;17	72;28	Awan_Short	62	62	8.77368	8.91016	7.875	21	7.12384	7.09438	GTATGTAAACGCAACTTAATACGCTTGGGCTTGGACATGCTGAAATGACAAAAATTGGTTGCACGATTTTTTGTGAATTTCTTATTCTAACGACTTACGATTTAG	UUCUAAC	UUCUAAC	16	72		NA	NA	NA	No	YES	No	NA	No	SPAC2F3.18c_intron1	UUCUAAC;AUUCUAA	14;15	31;2	YES	No
II	4275763	4275914	152	1	SPBC16A3.12c	SPBC16A3.12c.1:exon:2-SPBC16A3.12c.1:exon:3	int_3330	25	22	3	0	0	19	2	2	A;A	UUGACUAACAA;GAAGGGCAAAU	13;58	23;2	Awan_Short;Awan_Long	55	46	7.97931	8.01742	18.6667	5.875	5.9985	5.8159	GTAAGTTATTTGCTTGCCAGATCAAGACTCTATCCCGAGCTATTGTTGAAGACGCGTAAAGAAAAGCTATTGATTTAACAAATATGAGAAGGGCAAATGTTTACATTAGATTTTCGTAGGATATATTTGGCGTTGACTAACAATACATTTAG	GACUAAC	GACUAAC	13	23	AGGGCAA	58	2	NA	No	YES	No	YES	No	SPBC16A3.12c_intron2	GACUAAC	11	7	YES	No
II	2318252	2318333	82	-1	SPBC12D12.07c	SPBC12D12.07c.1:exon:2-SPBC12D12.07c.1:exon:1	int_3838	110	110	0	0	0	39	2	1	A;A	CUUGCUAAUUG;CCUUGCUAAUU	11;12	90;20	Awan_Short	88	64	3.82529	4.06463	89	21.6667	5.61111	5.60792	GTATGTATAGTCAATAATATATCATAGTAAAAAATAAAAGATAAAACTTTTTCGAATAGATCTCCTTGCTAATTGCTACTAG	UGCUAAU	UGCUAAU	11	90		NA	NA	NA	No	YES	No	NA	No	SPBC12D12.07c_intron1	UGCUAAU	9	37	YES	No
II	3888825	3888932	108	1	SPBC1604.21c	SPBC1604.21c.1:exon:2-SPBC1604.21c.1:exon:3	int_3268	252	252	0	0	0	46	3	1	A;A;A	CUUGCUAAUUU;GCUUGCUAAUU;UUGGUUUAGCU	12;13;55	230;20;2	Awan_Short	130	115	6.63741	6.6872	32.75	19.3333	8.2449	8.12875	GTAAGTTTTATTAGAAACATGAAGAGTCATTATTACCGGTGTTGATTTGGTTTAGCTTTATGTTTTTATATTCTTTCTTGTACTGAGCGCTTGCTAATTTATCTAAAG	UGCUAAU	UGCUAAU	12	230	GGUUUAG	55	2	NA	No	YES	No	YES	No	SPBC1604.21c_intron2	UGCUAAU	10	43	YES	No
I	1645232	1645355	124	-1	SPAC343.04c	SPAC343.04c.1:exon:3-SPAC343.04c.1:exon:2	int_1514	440	433	7	0	0	82	3	2	A;A;A	UAUUCUAACAU;UUAUUCUAACA;AUUACCCACUU	13;14;24	392;45;3	Awan_Short;Awan_Long	34	28	5.37548	5.92256	35	14.5	4.83057	5.17709	GTAAACAGGATAATTTAATTGAACGAAAAGTACAAGTTACACTGTATCAGTTCATGCTGTTGCAATCGATGCTTTTCGAATCAACTAGTTTCGATTACCCACTTTATTCTAACATGTACTCTAG	UUCUAAC	UUCUAAC	13	392	UACCCAC	24	3	NA	No	YES	No	YES	No	SPAC343.04c_intron2	UUCUAAC;AUUCUAA	11;12	72;2	YES	No
II	2240345	2240436	92	1	SPBC15C4.02	SPBC15C4.02.1:exon:2-SPBC15C4.02.1:exon:3	int_2824	186	186	0	0	0	91	4	1	A;A;A;A	UUUAUUAACUG;AUUUAUUAACU;UUAACUGACAA;CCCGAGAAAUU	11;12;7;20	119;37;28;2	Awan_Short	16	7	8.46479	8.34586	1	0.5	5.86802	5.66877	GTATGTAAATAGATTTCATCTGTCCCCTTAAGCCAGGAATTCTGTCTGATTTATGTATTTTTTTTCCCGAGAAATTTATTAACTGACAACAG	AACUGAC	UAUUAAC	11	119	AACUGAC	7	28	NA	YES	No	No	No	No	SPBC15C4.02_intron2	UAUUAAC;AACUGAC	9;5	29;7	YES	No
II	2349096	2349218	123	-1	SPBC19G7.03c	SPBC19G7.03c.1:exon:3-SPBC19G7.03c.1:exon:2	int_3847	165	152	13	0	0	67	4	2	A;A;A;A	AUUGCUAACUU;AAUUGCUAACU;UUGAUUAAUUG;GUUAUUUAUAU	14;15;21;37	126;35;3;1	Awan_Short;Awan_Long	1162	877	7.77282	8.176	52.8636	46.2105	9.89684	9.79586	GTAAGTATTAAAATTTAATACAGTTGTTGAAATTCAATTCAGATTAGCGAGTACTTGATACGTTGATTGAAACATTCGTGTTATTTATATTATTGTTGATTAATTGCTAACTTAATTTTTCAG	UGCUAAC	UGCUAAC	14	126	GAUUAAU	21	3	NA	No	YES	No	No	No	SPBC19G7.03c_intron2	UGCUAAC;UUGCUAA	12;13	26;1	YES	No
II	1524056	1524156	101	1	SPBC83.08	SPBC83.08.1:exon:1-SPBC83.08.1:exon:2	int_2688	932	932	0	0	0	103	5	1	A;A;A;A;A	UUAACUAAUCU;GUUAACUAAUC;UGAGUUAACUA;GUGAGUUAACU;AUUUUGAAAUU	17;18;21;22;60	801;92;31;7;1	Awan_Short	61	59	4.62416	4.81644	31	60	5.2469	5.56296	GTATGTTTTTAAAATAGAAATAGACCTCTAGCATATTTTGAAATTGGGGGGACTCAAATGCTTTAAAATTGAGTGAGTTAACTAATCTTTACTGTTTTTAG	AACUAAU	AACUAAU	17	801	AGUUAAC	21	31	NA	No	YES	No	No	No	SPBC83.08_intron1	AGUUAAC;AACUAAU	19;15	6;86	YES	No
II	2575097	2575280	184	-1	SPBC29A10.16c	SPBC29A10.16c.1:exon:2-SPBC29A10.16c.1:exon:1	int_3887	311	302	9	0	0	71	4	2	A;A;A;A	UCCACUAACUA;GUCCACUAACU;CAUGUCCACUA;CUUCUUGAUUA	14;15;18;53	283;26;1;1	Awan_Short;Awan_Long	15	6	8.01683	8.12673	5.33333	2.33333	8.20278	8.15206	GTAAATAATTCGACAAAACTTTTGTAGAAGTAAACACCATATTATGTTGGAGACTGCTATGCTCAAAAGCGATAGTATACTTTTAATCGCTATCGTTTCATTCATCAGTTCTTCACTTGTGTGCCTTCTTGATTAAAACATTGTATACGGCTTTTTAAACATGTCCACTAACTATTTGTTTTAG	CACUAAC	CACUAAC	14	283	UCUUGAU	53	1	NA	No	YES	No	No	No	SPBC29A10.16c_intron1	CACUAAC	12	76	YES	No
I	511071	511166	96	-1	SPAC227.08c	SPAC227.08c.1:exon:2-SPAC227.08c.1:exon:1	int_1227	48	48	0	0	0	27	3	1	A;A;A	AUAACUAAUAU;GAUAACUAAUA;CAUGAUAACUA	12;13;16	44;2;2	Awan_Short	30	38	1.79053	1.40427	15.5	39	4.71417	4.4597	GTATGTATATATAAAGAAGAGTAATATGAATATATATTTCATGTATTTTTCTATTTGTTTTTGTTTCTACCTTCATGATAACTAATATTATATAAG	AACUAAU	AACUAAU	12	44	UGAUAAC	16	2	NA	No	YES	No	YES	No	SPAC227.08c_intron1	AACUAAU;UAACUAA	10;11	16;1	YES	No
III	1366818	1366980	163	1	SPCC338.05c	SPCC338.05c.1:exon:2-SPCC338.05c.1:exon:3	int_4650	128	71	57	0	0	31	4	2	A;A;A;A	UGUACUAAUUU;UUGUACUAAUU;UGUUUUAAUAC;ACCGGGGACUA	17;18;43;104	122;3;2;1	Awan_Short;Awan_Long	201	151	8.56495	8.60282	25.25	38	7.73228	7.7057	GTATGTTTCTATTGGGGTATATTTCAAGTGTTAAATTGATGTAAAAAAAATGACCGGGGACTAGCTTTGAAATTTATGAAGACTTTCGAATCAATACACTTTGAAGCTTATCCTGTTTTAATACTTTTAACTTTCAATTTGTACTAATTTGTTATTAATTTAG	UACUAAU	UACUAAU	17	122	UUUUAAU	43	2	NA	No	YES	No	No	No	SPCC338.05c_intron2	UACUAAU	15	25	YES	No
I	4874437	4874604	168	1	SPAC4F10.20	SPAC4F10.20.1:exon:2-SPAC4F10.20.1:exon:3	int_1005	373	247	126	0	0	72	4	2	A;A;A;A	GAUAUUAACUC;UGAUAUUAACU;CAGUGAUAUUA;UAUGCCUAGAA	14;15;18;55	339;31;2;1	Awan_Short;Awan_Long	635	596	8.92201	8.87396	106	66.3333	9.1494	9.4029	GTACGTTTGCTTAGTAAAGTAATCGTTGCATAAGGGCGTGTATTTGTCACACTGGCTTACCATAGTTTGAACGCTTGTATTTTTGTTTTAACAAATTACACTTCCATATGCCTAGAACCGACTACTTAATTTTTTTTGTTAAGCAGTGATATTAACTCTTAATTTTAG	UCUUAAU	UAUUAAC	14	339	GUGAUAU	18	2	NA	No	No	No	YES	No	SPAC4F10.20_intron2	UAUUAAC	12	46	YES	No
II	1822164	1822264	101	-1	SPBC9B6.05c	SPBC9B6.05c.1:exon:5-SPBC9B6.05c.1:exon:4	int_3737	105	105	0	0	0	42	3	1	A;A;A	AAUGCUAAUGA;AAAUGCUAAUG;UUUCGCCAAAU	11;12;19	99;5;1	Awan_Short	120	94	6.09231	5.91598	20.1667	13.5714	6.12117	6.15688	GTACGTAGATTCTAAATATTACGCTCGAAAAGTTTGACCATGATTAAGCTTTCCTTTTCGAAACTGTTTTTCCTTTTTCGCCAAATGCTAATGAACTTTAG	UGCUAAU	UGCUAAU	11	99	UCGCCAA	19	1	NA	No	YES	No	YES	No	SPBC9B6.05c_intron4	UGCUAAU	9	32	YES	No
III	1978102	1978213	112	-1	SPCC18.12c	SPCC18.12c.1:exon:2-SPCC18.12c.1:exon:1	int_5261	21	21	0	0	0	17	2	1	A;A	UAAACUAACAU;UUAAACUAACA	13;14	16;5	Awan_Short	24	20	3.37549	3.25226	2.27273	1.90909	5.46859	5.47923	GTATGTGGTACAGAAAATGATGCTTGTAAAGATGCATCCTTACCCAAGTTCTAATTTGCAAACAATAAGCATTTTCTTTTTGGTGATGTTATTAAACTAACATGATTTTTAG	AACUAAC	AACUAAC	13	16		NA	NA	NA	No	YES	No	NA	No	SPCC18.12c_intron1	AACUAAC	11	2	YES	No
II	3007188	3007315	128	-1	SPBC15D4.01c	SPBC15D4.01c.1:exon:3-SPBC15D4.01c.1:exon:2	int_4003	14	13	1	0	0	14	1	2	A	AAUGCUGACGA	10	14	Awan_Short;Awan_Long	11	1	3.89905	3.83722	3	1	2.97556	1.68241	GTAAGTACACATACCATTGACGATTTTTAAGCAAAACATGTTTCTTTCTGATGACTTTTTTTTATTTTAAATCATTGCTATTCTCGTTTTGAAATATAATATGACGAATTTAATGCTGACGATTTTAG	UGCUGAC	UGCUGAC	10	14		NA	NA	NA	No	YES	No	NA	No	SPBC15D4.01c_intron2	UGCUGAC	8	2	YES	No
I	4423028	4423111	84	1	SPAC16.01	SPAC16.01.1:exon:1-SPAC16.01.1:exon:2	int_886	712	712	0	0	0	51	2	1	A;A	AAUAUUAAUAU;AAAUAUUAAUA	11;12	669;43	Awan_Short	17	8	4.40943	4.48444	18	4.5	4.08402	3.41827	GTACGATTCTATGGCCTAATATCTTTTTGCTTCTTTTATTTCTTCTACTCAAATTCATTTTCTTTAAATATTAATATTTTTAAG	GCCUAAU	UAUUAAU	11	669		NA	NA	NA	No	No	No	NA	No	SPAC16.01_intron1	AUAUUAA;UAUUAAU	10;9	6;374	YES	No
II	1700402	1700497	96	1	SPBC19C2.12	SPBC19C2.12.1:exon:2-SPBC19C2.12.1:exon:3	int_2718	51	51	0	0	0	26	2	1	A;A	UUUACUAAUGC;UUUUACUAAUG	15;16	42;9	Awan_Short	2	4	5.19991	5.31116	0.3	0.3125	5.61921	5.63145	GTACGTCCAAGACTTTTCTCTTATTATGGTGATCCTCTTAGTTTTATAAATATGAACTCCTTAAAATAGTGTTTTTTACTAATGCTACGATAATAG	UACUAAU	UACUAAU	15	42		NA	NA	NA	No	YES	No	NA	No	SPBC19C2.12_intron2	UACUAAU	13	7	YES	No
III	63337	63435	99	1	SPCC757.08	SPCC757.08.1:exon:2-SPCC757.08.1:exon:3	int_4370	129	129	0	0	0	33	2	1	A;A	CAUACUAAUAA;ACAUACUAAUA	10;11	116;13	Awan_Short	6	6	6.23798	6.48089	3.5	2.33333	5.68776	5.7146	GTAAGAAATGATCTGTATTGTACTTTTACTTTTGTCAGCCGAAGGGTTGATTCAGTGGCTGTTTTTTTTTTCCACCTAACAACATACTAATAATCACAG	UACUAAU	UACUAAU	10	116		NA	NA	NA	No	YES	No	NA	No	SPCC757.08_intron3	UACUAAU	8	12	YES	No
I	3175907	3175992	86	-1	SPAC3G9.05	SPAC3G9.05.1:exon:2-SPAC3G9.05.1:exon:1	int_1861	114	114	0	0	0	41	3	1	A;A;A	ACCUCUAACGC;CACCUCUAACG;UGUAAUCACCU	14;15;21	96;15;3	Awan_Short	1	1	8.31773	8.78407	2	2	1.17162	1.978	GTATGTTAAAAATTGGTTTAAAATTAAGCTGTACAATTGCTTTGACCCACGGAAACAATGTAATCACCTCTAACGCTATTTTATAG	CUCUAAC	CUCUAAC	14	96	UAAUCAC	21	3	NA	No	YES	No	YES	No	SPAC3G9.05_intron1	CUCUAAC;CCUCUAA;UAAUCAC	12;13;19	41;1;3	YES	No
I	501249	501365	117	-1	SPAC227.19c	SPAC227.19c.1:exon:2-SPAC227.19c.1:exon:1	int_1222	201	199	2	0	0	46	2	2	A;A	GGUUCUAAUAU;UGGUUCUAAUA	13;14	179;22	Awan_Short;Awan_Long	5	4	5.75305	6.09155	2	5	4.19652	4.40426	GTAAGTTATGATGCTAAAATCTCAATGGCATCGTCGAATATTTTCTGCCAGGGTCATTGTACCAATATGTTTTAATTTCTCTATCTTGTACAAATTTGGTTCTAATATTTTTAACAG	UUCUAAU	UUCUAAU	13	179		NA	NA	NA	No	YES	No	NA	No	SPAC227.19c_intron1	UUCUAAU	11	21	YES	No
I	1429618	1429708	91	-1	SPAC3A12.05c	SPAC3A12.05c.1:exon:3-SPAC3A12.05c.1:exon:2	int_1451	303	303	0	0	0	77	4	1	A;A;A;A	UUUACUAACUU;AUUUACUAACU;AUCAUUUACUA;UUUCUUCAAUG	10;11;14;38	275;26;1;1	Awan_Short	3	2	2.45266	2.32943	4	3	4.14519	4.46448	GTAAGTAGATTTTTGAGTGGAAGTTTTATAGCTTTCATTCGCTTGTTTTCTTCAATGCGCGTCTTGTATGATCATTTACTAACTTGTTAAG	UACUAAC	UACUAAC	10	275	UCUUCAA	38	1	NA	No	YES	No	YES	No	SPAC3A12.05c_intron2	UACUAAC	8	66	YES	No
I	2146171	2146325	155	1	SPAC23C11.08	SPAC23C11.08.1:exon:3-SPAC23C11.08.1:exon:4	int_459	170	140	30	0	0	70	5	2	A;A;A;A;A	UUUUCUAACAU;CUUUUCUAACA;UCAUACCAAAA;AGCAAUGAAGG;UACUUCUACUU	13;14;42;70;112	140;22;6;1;1	Awan_Short;Awan_Long	25	24	7.44587	7.75968	26	12.5	3.93007	3.91523	GTAAGGAAAAATTCTTTATTTGAATGGTGATACGTGTACTTCTACTTCCTTGTTGGCTTAGAGATTTAAATTGTCTCAAGCAATGAAGGCGCAACAATTCATTCACTCATACCAAAATTTCATTCTCATAGTCACTTTTCTAACATCTACTCTAG	UUCUAAC	UUCUAAC	13	140	AUACCAA	42	6	NA	No	YES	No	YES	No	SPAC23C11.08_intron3	UUCUAAC	11	12	YES	No
I	4902002	4902132	131	1	SPAC19B12.10	SPAC19B12.10.1:exon:2-SPAC19B12.10.1:exon:3	int_1012	44	33	11	0	0	32	3	2	A;A;A	CUUACUAACAA;ACUUACUAACA;AAAACUUACUA	12;13;16	33;10;1	Awan_Short;Awan_Long	4	2	6.26093	6.39543	0.833333	1.5	3.15665	2.59049	GTTCGTTGATGTAATATAGTCATGCACTAGGAATATGCACATTTGCATCCAGATATTTACCCTGTACAATTTTGAATGGGATTGTTTTTCTTTAGCTGAATTTTTATAAAAACTTACTAACAATGTAATAG	UACUAAC	UACUAAC	12	33	AACUUAC	16	1	NA	No	YES	No	No	No	SPAC19B12.10_intron2	UACUAAC	10	9	YES	No
II	1123247	1123384	138	1	SPBC1709.12	SPBC1709.12.1:exon:1-SPBC1709.12.1:exon:2	int_2556	229	161	68	0	0	49	3	2	A;A;A	CAUACUAACUG;UCAUACUAACU;UUUUCAUACUA	12;13;16	205;23;1	Awan_Short;Awan_Long	10	9	4.53375	4.86256	11	10	3.56813	3.82678	GTATGTTTACATTTTGTGCAGCTACGTGAATCAAAGTGGTGATGCTTAAATTATCTTTTTTTTTGGCACTACTATTGTTTTGATTGAATGATAAATCATTCGTTTATTTTGAGGTTTTTCATACTAACTGCAATACAG	UACUAAC	UACUAAC	12	205	UUCAUAC	16	1	NA	No	YES	No	YES	No	SPBC1709.12_intron1	AUACUAA;UACUAAC	11;10	1;118	YES	No
I	5017253	5017420	168	-1	SPAC890.07c	SPAC890.07c.1:exon:4-SPAC890.07c.1:exon:3	int_2285	303	238	65	0	0	76	5	2	A;A;A;A;A	UAUACUAAUUU;UCCGAUCAGUA;GUAUACUAAUU;AAUUGUGAUUU;ACGACGUAGAA	8;17;9;36;128	216;61;24;1;1	Awan_Short;Awan_Long	124	83	8.27088	8.14689	125	42	7.89798	7.6314	GTATTTTTACTGTTTTATTAATCGCAACAATCAACGACGTAGAAGCAATTTAATTAGGTTTTCGATCTCTTCGTGAAGGCAATTGTCATCAAGAGTTATAAATTTTTATCTTTTTAAAATACTTGAATTGTGATTTTTTGATTATCCGATCAGTATACTAATTTTCAG	UACUAAU	UACUAAU	8	216	CGAUCAG	17	61	NA	No	YES	No	YES	No	SPAC890.07c_intron3	UACUAAU	6	47	YES	No
II	3610893	3611022	130	-1	SPBC16D10.07c	SPBC16D10.07c.1:exon:4-SPBC16D10.07c.1:exon:3	int_4175	14	13	1	0	0	9	2	2	A;A	UUUAUUAACGU;AUUUAUUAACG	10;11	13;1	Awan_Short;Awan_Long	7	3	2.44058	2.64493	8	2	5.26723	4.75169	GTATGCTTACTGATTTATAACTTGCATTACATTAAATTAGCAGATTATTTTTGTTAAATTGCAATAATAATTTGGTCTACTGCATGTTTTGTTTTCTTATGACTTTACCTAGATTTATTAACGTAAATAG	UACUGAU	UAUUAAC	10	13		NA	NA	NA	No	No	No	NA	No	SPBC16D10.07c_intron3	UAUUAAC	8	3	YES	No
II	2016420	2016569	150	1	SPBP23A10.10	SPBP23A10.10.1:exon:1-SPBP23A10.10.1:exon:2	int_2783	28	21	7	0	0	18	3	2	A;A;A	UAUUCUAACGU;CCAAGUAAGUA;GUAUUCUAACG	15;24;16	21;4;3	Awan_Short;Awan_Long	5	0	7.71652	7.98151	0.352941	0.047619	3.05356	-16.6096	GTATGCTATATTCCTTGATAAACTCGATTATCAGCGCTGTATGAAAGATTGTAGTTATGTTTATGTAATTGATCATCCTCATCGTCATTTCTATAATCTATTTAGATACATTTCGTATCCCAAGTAAGTATTCTAACGTTGAATGTTTAG	UUCUAAC	UUCUAAC	15	21	AAGUAAG	24	4	NA	No	YES	No	YES	No	SPBP23A10.10_intron1	UUCUAAC	13	11	YES	No
I	4034950	4035090	141	-1	SPAC27E2.10c	SPAC27E2.10c.1:exon:5-SPAC27E2.10c.1:exon:4	int_2067	49	47	2	0	0	22	3	2	A;A;A	CAAGCUAACCA;CCAAGCUAACC;CCCGUUAAUUU	16;17;35	45;3;1	Awan_Short;Awan_Long	5	9	6.35487	6.30911	6	10	1.93808	3.34537	GTAAGCCATTTTTTAAACAAAGTGTGGAAGATAAAGTAAAAGAAATACTCTATAATCTTTCCGCTTTTCTAATTCCTCGTTGTTAATCCCTTCCTTTTTCCCGTTAATTTCTTTTTTCCAAGCTAACCAGTTACTAATCAG	UACUAAU	AGCUAAC	16	45	CGUUAAU	35	1	NA	No	No	No	No	No	SPAC27E2.10c_intron4	AGCUAAC	14	8	YES	No
I	5369783	5369973	191	-1	SPAC4D7.10c	SPAC4D7.10c.1:exon:2-SPAC4D7.10c.1:exon:1	int_2346	39	36	3	0	0	25	2	2	A;A	CUUGCUAACUG;CCUUGCUAACU	11;12	34;5	Awan_Short;Awan_Long	74	76	10.1888	10.1886	37.5	77	4.85275	4.83153	GTAAGTAAAATTAATATGTTATTTGGATATTTTTGTATGATGACTATAATTTGCGATTGAGCGATGGTATTGCTCGGGATCTTGCCTGATTCCCATATGGGCTCCATCAGTATGCGACAAATAATCTTCTGATTGATTTCCATTACATCAACTGCTTTTGTTAATACGAATACCTTGCTAACTGTTTTAAG	UGCUAAC	UGCUAAC	11	34		NA	NA	NA	No	YES	No	NA	No	SPAC4D7.10c_intron3	UGCUAAC	9	8	YES	No
I	3623176	3623308	133	-1	SPAC17G6.16c	SPAC17G6.16c.1:exon:4-SPAC17G6.16c.1:exon:3	int_1971	44	35	9	0	0	18	2	2	A;A	AUUUCUAACUU;UAUUUCUAACU	11;12	38;6	Awan_Short;Awan_Long	64	29	4.49013	4.78194	13	10	5.83999	5.27078	GTAAGTCCCTTTTGTACCACTACTTGAGACGACCATAGGTTATTAGATTAGAGTACTTCTTGTACCAATTACTATTATGGTCCCTTAGGCATTGATTCATTTTTTTTTGAAAAGTATTTCTAACTTAAGCAAG	UUCUAAC	UUCUAAC	11	38		NA	NA	NA	No	YES	No	NA	No	SPAC17G6.16c_intron3	UUCUAAC	9	15	YES	No
II	2960703	2960809	107	-1	SPBC2A9.14	SPBC2A9.14.1:exon:2-SPBC2A9.14.1:exon:1	int_3988	9	9	0	0	0	8	1	1	A	GUUGCUGACUC	14	9	Awan_Short	75	57	5.32052	4.75872	12.6667	58	4.08458	4.01821	GTAAGTACTTAGAATCAAATTTTATTACTTTTTCTTTTCTTCCTTTATTCCCTTTGTCTTATTAGTATGTATGTTGGACATTAAAAGTTGCTGACTCCTTTCTTTAG	UGCUGAC	UGCUGAC	14	9		NA	NA	NA	No	YES	No	NA	No	SPBC2A9.14_intron1	UGCUGAC	12	2	YES	No
III	1306975	1307128	154	1	SPCC1322.09	SPCC1322.09.1:exon:2-SPCC1322.09.1:exon:3	int_4637	1	0	1	0	0	1	1	1	A	UUUACUGACAU	12	1	Awan_Long	114	63	7.48156	7.27396	11.5	5.81818	6.15846	6.16076	GTAAGTTGCGTATTTACGTTTACGCTTTGGACATAGCACTAATATTTGTGCTTTCTTTTATGCTGTCACCGATTACTTGGTTTTCAAAAGACAGATAGGTCAATGCATAATCATAATTAAGTTTTATGGGATAATTTTACTGACATGTTACCAG	UACUGAC	UACUGAC	12	1		NA	NA	NA	No	YES	No	No	No	NA	NA	0	0	No	No
I	3515855	3515932	78	1	SPAC16E8.09	SPAC16E8.09.1:exon:1-SPAC16E8.09.1:exon:2	int_730	57	57	0	0	0	46	4	1	A;A;A;A	CUAACUAACUU;UUAACUAACUA;AUUAACUAACU;ACUAACUAACU	11;15;16;12	28;20;6;3	Awan_Short	43	25	5.27991	4.59135	4.88889	4.33333	4.48148	3.93249	GTATGTAACGATTGAAAGAAATTTAGAACACAAAAACGCCATTTATGTGTATGCAATTAACTAACTAACTTCTAAAAG	AACUAAC	AACUAAC	11	28	AACUAAC	15	20	NA	No	YES	No	No	No	SPAC16E8.09_intron1	UAACUAA;AACUAAC;AACUAAC	14;13;9	1;3;4	YES	No
I	5256844	5257012	169	1	SPAC14C4.14	SPAC14C4.14.1:exon:1-SPAC14C4.14.1:exon:2	int_1086	163	123	40	0	0	31	3	2	A;A;A	UUUACUAAUUG;GUUUACUAAUU;UUAUAAUAGUC	11;12;43	143;13;7	Awan_Short;Awan_Long	97	73	10.2701	10.1498	4.26087	4.93333	7.46726	6.96456	GTATGTGTACTCTTTTTTGGAAGAATTCGAACTGCTAAATTGCATTGTTGAAAGGGGATGCAAACGGGTGTTGGAATCGTCTTATTTTCGGAAGTGAATTCTACATGTTTGTTTTCTTCTTATAATAGTCATGTCTATGCTTTAATGATTGTTTACTAATTGTCCCTAG	UACUAAU	UACUAAU	11	143	AUAAUAG	43	7	NA	No	YES	No	YES	No	SPAC14C4.14_intron1	UACUAAU	9	6	YES	No
III	2046701	2046784	84	-1	SPCC1739.09c	SPCC1739.09c.1:exon:6-SPCC1739.09c.1:exon:5	int_5268	245	245	0	0	0	58	3	1	A;A;A	UUUACUAAUGA;AUUUACUAAUG;GAAAUUUACUA	11;12;15	229;15;1	Awan_Short	84	99	6.15309	6.29735	42.5	50	6.85432	7.00995	GTAAGATGAGAATGAGAGAGAAGAGAGGAAAGAAGGGAGAGATTATGTTTGTATGAGACAAGGAAATTTACTAATGATATACAG	UACUAAU	UACUAAU	11	229	AAUUUAC	15	1	NA	No	YES	No	No	No	SPCC1739.09c_intron5	UACUAAU	9	28	YES	No
I	709340	709427	88	-1	SPAC1296.01c	SPAC1296.01c.1:exon:5-SPAC1296.01c.1:exon:4	int_1265	187	187	0	0	0	55	4	1	A;A;A;A	AAGACUAACAU;CAAGACUAACA;ACAUCUAAUAC;GUCCAAGACUA	15;16;8;19	165;16;5;1	Awan_Short	176	113	4.50102	5.09051	10.4118	11.4	6.93221	6.72485	GTTTGTTTTACTTTTATTGTCGATATTAGATCACTTAATTTCTCCGCTTTTTTAAATCTTATGTCCAAGACTAACATCTAATACTTAG	AUCUAAU	GACUAAC	15	165	AUCUAAU	8	5	NA	YES	No	No	NA	No	SPAC1296.01c_intron4	AUCUAAU;GACUAAC;AGACUAA	6;13;14	2;50;2	YES	No
III	1266418	1266511	94	-1	SPCC23B6.01c	SPCC23B6.01c.1:exon:4-SPCC23B6.01c.1:exon:3	int_5133	274	274	0	0	0	42	1	1	A	GUUAUUGACCA	15	274	Awan_Short	283	307	6.61531	6.8609	10.5185	13.3913	8.36393	8.58438	GTATGTGACGTTGAAGTAGATGTGAAGAAATTCAAAGTCTTCTATGACAACCTTTGCGTGATTGACGGGCGGGTTATTGACCACATGTTCGCAG	UAUUGAC	UAUUGAC	15	274		NA	NA	NA	No	YES	No	NA	No	SPCC23B6.01c_intron3	UAUUGAC	13	124	YES	No
III	223604	223686	83	1	SPCC548.04	SPCC548.04.1:exon:2-SPCC548.04.1:exon:3	int_4413	9	9	0	0	0	8	2	1	A;A	AGAACUAACAC;CAGAACUAACA	14;15	8;1	Awan_Short	16	16	5.15019	5.19915	1.0625	1.21429	4.34692	4.40991	GTAAGTGAACATGGAGTGGTATCATCTTTTTCAGGCTCAAACGATGTTTTAAATGATTTTGCAGAACTAACACTTCCCTGCAG	AACUAAC	AACUAAC	14	8		NA	NA	NA	No	YES	No	No	No	SPCC548.04_intron2	AACUAAC	12	4	YES	No
I	3659421	3659526	106	1	SPAC8C9.11	SPAC8C9.11.1:exon:2-SPAC8C9.11.1:exon:3	int_751	225	225	0	0	0	61	4	1	A;A;A;A	GUUACUAACUU;AGUUACUAACU;AAGAAGAAGGA;AUCAGUUACUA	13;14;62;17	200;21;3;1	Awan_Short	44	28	6.90023	6.38232	5.625	2.9	6.00465	5.7694	GTTCGTACTCTAAGTTTCAGGCATATAAGATAGAAAAAAGAAGAAGGAATCTGAAAAAAAAAAATGCTTTCAACTATTCTTAATCAGTTACTAACTTTAAATGCAG	UACUAAC	UACUAAC	13	200	GAAGAAG	62	3	NA	No	YES	No	YES	No	SPAC8C9.11_intron2	UACUAAC	11	81	YES	No
III	1281951	1282051	101	-1	SPCC23B6.05c	SPCC23B6.05c.1:exon:3-SPCC23B6.05c.1:exon:2	int_5137	155	155	0	0	0	52	5	1	A;A;A;A;A	UUAACUAAUUU;CCGAUUAACUA;AUUAACUAAUU;ACCGAUUAACU;UUCUGCUAAGU	17;21;18;22;47	126;18;9;1;1	Awan_Short	152	100	5.53745	5.98637	38.25	50.5	6.29931	6.08645	GTAAGTTGTGTTTATAAAAATAATAAGGAAGTCCTTTGAACTTCTGCTTCTGCTAAGTCCTACATTCTATTGACCGATTAACTAATTTCCTGTTCCTTTAG	AACUAAU	AACUAAU	17	126	GAUUAAC	21	18	NA	No	YES	No	No	No	SPCC23B6.05c_intron2	AACUAAU;GAUUAAC	15;19	19;3	YES	No
II	3874462	3874797	336	-1	SPNCRNA.445	SPNCRNA.445.1:exon:2-SPNCRNA.445.1:exon:1	int_4231	232	200	32	0	0	82	12	2	A;A;A;A;A;A;A;A;A;A;A;A	AUUACUAACUU;AAUUACUAACU;UGAACUAACUC;UAUAUUAACUA;AUUAAUUACUA;CUGAACUAACU;UUAACUAAUUU;AAAGCCUAAUU;CUCAAUAAUUU;GUUGCUGAACU;UGCGGACACUU;GAUGCGGACAC	173;174;217;10;177;218;6;196;209;222;253;255	147;56;13;6;2;2;1;1;1;1;1;1	Awan_Short;Awan_Long	12	10	11.2195	11.2164	3.25	2.2	3.96485	3.59956	GTATGTGCAAATTTTTTTTTTTTTAAATATGTTTTGAGTTGATGATGATCATTTCTGTTCCTAGTAGGGCATTCGATGCGGACACTTTTGTATTTTAGGAATTCTTCGTTGCTGAACTAACTCAATAATTTTGAAAGCCTAATTCGATTACTATTAATTACTAACTTCTTAGGTATGTTTATTGAGTCTGTGTTAAGATTGCTAAGATGATTATACTTTACCCCTTTCTGTTGGTGATAATCAATGATCCTCAGAAAACATGCATCACCGAATGAACATAGCACGTCTCAGCCATTAATTTCGTAATTATTAATGTTTTTATATTAACTAATTTAG	AACUAAU	UACUAAC	173	147	AACUAAC	217	13	NA	No	No	No	No	No	NA	NA	0	0	No	No
I	3667171	3667313	143	1	SPAC8C9.14	SPAC8C9.14.1:exon:4-SPAC8C9.14.1:exon:5	int_757	1148	563	585	0	0	103	5	2	A;A;A;A;A	UAUACUAAUCA;UUAUACUAAUC;CUAUUAUACUA;UUUUAGAAUUU;AGAAACAAACU	17;18;21;32;83	654;468;23;2;1	Awan_Short;Awan_Long	23	23	9.00025	9.12856	4	4.8	6.58359	6.42403	GTATGTCATATGGGTTAAGGATTTAGGGGCTTCATACTTGTTGAATAGGTTTGAGAAACAAACTTGTCTTCATTCCATCATACTTGTAAAAAAGCCATCCCTCCTTTTAGAATTTCTATTATACTAATCATTCTCTTCTTTAG	UACUAAU	UACUAAU	17	654	AUUAUAC	21	23	NA	No	YES	No	YES	No	SPAC8C9.14_intron4	AUUAUAC;UACUAAU	19;15	3;30	YES	No
I	4485597	4485712	116	-1	SPAC17C9.08	SPAC17C9.08.1:exon:2-SPAC17C9.08.1:exon:1	int_2165	54	54	0	0	0	23	3	1	A;A;A	UAUAUUAAUAA;UUAUAUUAAUA;GCAUUAUAUUA	12;13;16	44;9;1	Awan_Short	63	45	8.74872	8.70716	21.3333	5.75	6.19861	6.18654	GTAAGCAAAAACACCGTTTCCTAAGCTTTCTTTACCTAGGAATTATAGATCACGGCAATAGATTAAATGTTTAAATTTCTGGTCTCTCGGAGTGCATTATATTAATAATAAACTAG	UAUUAAU	UAUUAAU	12	44	AUUAUAU	16	1	NA	No	YES	No	YES	No	SPAC17C9.08_intron1	UAUUAAU	10	13	YES	No
I	3166759	3166864	106	1	SPAC3G9.09c	SPAC3G9.09c.1:exon:2-SPAC3G9.09c.1:exon:3	int_665	13	13	0	0	0	11	3	1	A;A;A	UGUACUAACCA;AUGUACUAACC;GGUUUAUAAGU	12;13;32	10;2;1	Awan_Short	245	210	6.66437	6.89938	246	105.5	7.9263	8.00433	GTAAGAATTTATTAGTAGTTTTTTTTTTTTTTTTTTTTAAAAAAAAGAAAAACAAAAGGGGAAAAAAGGTTTATAAGTTGTTAGGAATGTACTAACCAGGATTAAG	UACUAAC	UACUAAC	12	10	UUUAUAA	32	1	NA	No	YES	No	NA	No	NA	NA	0	0	No	No
I	1225937	1226038	102	1	SPAC10F6.10	SPAC10F6.10.1:exon:2-SPAC10F6.10.1:exon:3	int_275	16	16	0	0	0	9	1	1	A	AGUACUGACAA	10	16	Awan_Short	21	16	7.35052	7.39575	5.5	5.66667	4.09865	4.18187	GTAAGTGTAATATAGTTTAACTGCTCATAGGTTTTAGAACTCGAGGTCTTTTGATCCTTCACACTTTTACATTTTCATGTTTAATAGTACTGACAAATAAAG	UACUGAC	UACUGAC	10	16		NA	NA	NA	No	YES	No	NA	No	SPAC10F6.10_intron2	UACUGAC	8	12	YES	No
III	462816	462983	168	1	SPCC4G3.05c	SPCC4G3.05c.1:exon:1-SPCC4G3.05c.1:exon:2	int_4463	48	45	3	0	0	20	2	2	A;A	CGUGCUAAUAA;CCGUGCUAAUA	8;9	43;5	Awan_Short;Awan_Long	6	1	6.34949	6.16372	0.5	0.08	5.11245	5.14843	GTAGGAAATTTATTGGATTAGTGAAAAACTCTTTGAAAAATAAATAATTTAAATATTAAATTAATAATGACTGTAATTTTTCGAAAGCTTTTATAGCTTCGTACTCCATAAATATCATAACAATCACTGTTGTTGTTGTTTTAAATAAGAAACCGTGCTAATAATTAG	UGCUAAU	UGCUAAU	8	43		NA	NA	NA	No	YES	No	NA	No	SPCC4G3.05c_intron1	GUGCUAA;UGCUAAU	7;6	1;14	YES	No
I	2851558	2851666	109	-1	SPAC3F10.16c	SPAC3F10.16c.1:exon:2-SPAC3F10.16c.1:exon:1	int_1792	291	291	0	0	0	39	2	1	A;A	UUUGCUAAUUG;UUUUGCUAAUU	15;16	259;32	Awan_Short	46	34	7.49908	7.62703	47	17.5	5.17818	5.19698	GTATGTCAGTAACTTAACAACTCTTAAAGTTAGACTTGTGATTTTCTCTTTACATGCAGCTTATGCTGGATTGTCAATTGAAAGCTTTTTGCTAATTGTCATTGAGTAG	UGCUAAU	UGCUAAU	15	259		NA	NA	NA	No	YES	No	No	No	SPAC3F10.16c_intron1	UGCUAAU;UUGCUAA	13;14	204;7	YES	No
I	3933839	3933960	122	-1	SPAC2F3.06c	SPAC2F3.06c.1:exon:2-SPAC2F3.06c.1:exon:1	int_2050	86	85	1	0	0	27	4	2	A;A;A;A	AUAACUAACUU;CAUAACUAACU;UGGCAUAACUA;AAAUGGCAUAA	12;13;16;19	75;9;1;1	Awan_Short;Awan_Long	84	88	5.5843	6.02196	14.1667	89	5.99596	6.13529	GTAAGATTTTTTTTTTCTAAAATTAAAAGTTTCTTTCTCGTTGTAGAAGATGCTTCTTTTTACTTCACGTGTGTAACGACGTGTGAAGAAGAAATCAAATGGCATAACTAACTTTATTATAG	AACUAAC	AACUAAC	12	75	AUGGCAU	19	1	NA	No	YES	No	YES	No	SPAC2F3.06c_intron1	AACUAAC	10	2	YES	No
I	756882	756988	107	-1	SPAC4G8.02c	SPAC4G8.02c.1:exon:2-SPAC4G8.02c.1:exon:1	int_1281	218	218	0	0	0	45	6	1	A;A;A;A;A;A	AUUACUAAUAG;UAUUACUAAUA;UCAUACGAGCU;AGCUAUUACUA;AUUAUUCAUAC;AAUACUCAAUG	9;10;20;13;25;83	201;12;2;1;1;1	Awan_Short	38	17	4.46691	5.26568	19.5	2.57143	5.79751	5.40706	GTATCGTAGTTATAATGAATACTCAATGAAATTGAGAGTTTGCTATTATCTTCTCTTTCATACCCTAGCAAAATAATTATTCATACGAGCTATTACTAATAGAACAG	UACUAAU	UACUAAU	9	201	AUACGAG	20	2	NA	No	YES	No	NA	No	SPAC4G8.02c_intron1	UACUAAU;UAUUCAU	7;23	58;1	YES	No
II	3522920	3523001	82	1	SPBC1105.09	SPBC1105.09.1:exon:1-SPBC1105.09.1:exon:2	int_3186	27	27	0	0	0	20	1	1	A	CAUACUGAUAG	10	27	Awan_Short	25	15	7.03474	6.97508	26	5.33333	4.04428	3.77421	GTAAGCGCACGAAATCTTCATATCCAAATATTCATGATTGTACATAGTATCTTAATTCTTGAACACATACTGATAGATATAG	UACUGAU	UACUGAU	10	27		NA	NA	NA	No	YES	No	NA	No	SPBC1105.09_intron1	UACUGAU	8	8	YES	No
III	1861259	1861382	124	-1	SPCC1223.10c	SPCC1223.10c.1:exon:4-SPCC1223.10c.1:exon:3	int_5235	82	82	0	0	0	34	2	1	A;A	GAUACUAACAU;CGAUACUAACA	14;15	76;6	Awan_Short	14	14	4.20265	4.49446	7.5	5	3.06704	3.02005	GTAAGTTATTGTCCCATATACTATTTTTAAAGAGGTTAAAATCTATGTATGCATGCGTGCATGTGTATGTATAGAACAGGAATCGTTTTCATGTCACTACTACGATACTAACATTAGGCATTAG	UACUAAC	UACUAAC	14	76		NA	NA	NA	No	YES	No	NA	No	SPCC1223.10c_intron3	UACUAAC	12	9	YES	No
II	3665138	3665233	96	-1	SPBP8B7.16c	SPBP8B7.16c.1:exon:2-SPBP8B7.16c.1:exon:1	int_4193	96	96	0	0	0	36	2	1	A;A	AAUAUUAACAU;UAAUAUUAACA	11;12	90;6	Awan_Short	59	38	3.54541	4.03653	10	13	6.57222	6.11304	GTAAGAATTCACAATTGGGCGTGCCCCTGTTCAGTACAAAATTATTGATACTGATTTACCTTTTTTTTTAAAATAATTAATATTAACATTTTACAG	UACUGAU	UAUUAAC	11	90		NA	NA	NA	No	No	No	No	No	SPBP8B7.16c_intron1	UAUUAAC	9	4	YES	No
I	1981958	1982040	83	-1	SPAC9G1.06c	SPAC9G1.06c.1:exon:2-SPAC9G1.06c.1:exon:1	int_1584	276	276	0	0	0	46	4	1	A;A;A;A	UAUAUUAAUGU;AUAUAUUAAUG;AAUAUAUAUUA;AACAUUUAAAG	12;13;16;70	260;14;1;1	Awan_Short	30	17	3.90734	3.81582	10.3333	18	4.04484	3.75169	GTTCGTAACATTTAAAGATGCTGTTAAGTAACGTCGCAATTATTGATGTAAAGTTTAAAAAATATATATTAATGTGTTTTCAG	UAUUAAU	UAUUAAU	12	260	UAUAUAU	16	1	NA	No	YES	No	YES	No	SPAC9G1.06c_intron1	UAUUAAU;AUAUUAA	10;11	104;1	YES	No
I	879836	879986	151	-1	SPAC23G3.07c	SPAC23G3.07c.1:exon:2-SPAC23G3.07c.1:exon:1	int_1313	117	66	51	0	0	32	3	2	A;A;A	GUUACUAAUUC;UGUUACUAAUU;CGUUGUUACUA	13;14;17	109;6;2	Awan_Short;Awan_Long	31	19	7.09998	7.23947	10.6667	10	4.18872	3.99745	GTAAGTGATTGAAATGTTTTGCTTACGTGCACACTTAGCTGCGGAAGGATATTCATTGTGTGTATCCATTTTCGGCTCCTCAAATTGCGCTTCGCACTGTCTCTCTTTTATTACATTATATTTTTTTCGTTGTTACTAATTCATTTACTAG	UACUAAU	UACUAAU	13	109	UUGUUAC	17	2	NA	No	YES	No	YES	No	SPAC23G3.07c_intron1	UACUAAU;UUACUAA	11;12	13;1	YES	No
I	1506899	1507027	129	-1	SPAC5D6.04	SPAC5D6.04.1:exon:2-SPAC5D6.04.1:exon:1	int_1472	192	182	10	0	0	61	3	2	A;A;A	UUUACUAACUU;UUUUACUAACU;GUUCUCUAGUA	11;12;23	137;37;18	Awan_Short;Awan_Long	39	43	4.85611	5.01362	5.71429	11	7.57505	7.9077	GTATGATTCATTTTACCCCCCGTTTTAAAGAAAAATGGAGCAGTGAAATAAAGAAATAAATTTTCAACTATTAAATTTCTTCTCTTCATTTATCTTTGCGTTCTCTAGTATTTTACTAACTTTACACAG	UACUAAC	UACUAAC	11	137	UCUCUAG	23	18	NA	No	YES	No	YES	No	SPAC5D6.04_intron1	UACUAAC;UUACUAA	9;10	151;1	YES	No
II	2720591	2720757	167	-1	SPBC4F6.16c	SPBC4F6.16c.1:exon:1-SPBC4F6.16c.1:three_prime_UTR:1	int_3935	682	651	31	0	0	112	10	2	A;A;A;A;A;A;A;A;A;A	UUUACUAACAU;AUUUACUAACA;UUGCUUCAAAU;GAAGAGAAACC;CGAAGAGAAAC;AACGAAGAGAA;CCCCAGCAAAC;CAAACGAAGAG;GAGCGGGAUUA;GUUACUGAGCG	9;10;32;79;80;82;90;84;104;110	564;105;2;2;2;2;2;1;1;1	Awan_Short;Awan_Long	5	0	8.47459	8.55622	0.461538	0.1	6.74083	6.68798	GTATGTCAAAAAACGGTTTTTGGAAGCTATGATGACCAAAATTGGTCCGTGTTACTGAGCGGGATTAAGACCCCAGCAAACGAAGAGAAACCCAATTTTTAATTCTGATTTTTTCCTCAAAAATTTTTTTGCTTCAAATTTTGTTCCTTAATTTACTAACATCTTAG	UACUAAC	UACUAAC	9	564	AGAGAAA	79	2	NA	No	YES	No	YES	No	SPBC4F6.16c_intron1	UACUAAC;UUACUAA	7;8	207;1	YES	No
I	1135777	1135931	155	-1	SPAC56F8.05c	SPAC56F8.05c.1:exon:2-SPAC56F8.05c.1:exon:1	int_1381	120	98	22	0	0	39	3	2	A;A;A	CUUAUUAACAG;UCUUAUUAACA;UUAUGUUAGNN	14;15;2	108;11;1	Awan_Short;Awan_Long	276	212	8.13691	7.7575	138.5	106.5	8.24395	8.24879	GTAAGATGCATTTGTTATATTGTATTGCTGTTTAAATCTTCAGTTAGTATTTGCGTTTTTATTACCCGCAGCCGTGATTTTATTTTTAAAGTGATCGTTTTAGTTGATTTATTCATTCCGATAAACAAGAATATCTTATTAACAGTTTATGTTAG	UAUUAAC	UAUUAAC	14	108	AUGUUAG	2	1	NA	YES	YES	No	NA	No	SPAC56F8.05c_intron1	UAUUAAC	12	40	YES	No
II	1047677	1047787	111	1	SPBC337.09	SPBC337.09.1:exon:1-SPBC337.09.1:exon:2	int_2533	7	7	0	0	0	6	1	1	A	UUUGCUGACUU	15	7	Awan_Short	234	215	4.10463	4.89525	78.3333	216	6.61561	6.65906	GTAAGAATCATGGTTTTTACGAGTTTAATTGATTTATAATACACATAATAAGCTCTTTAATGATGCTTTTTTTTATTAGCTGATTATTTTTTGCTGACTTTATATCTGTAG	UGCUGAC	UGCUGAC	15	7		NA	NA	NA	No	YES	No	No	No	SPBC337.09_intron1	UGCUGAC	13	1	YES	No
II	2394610	2394702	93	-1	SPBC36B7.08c	SPBC36B7.08c.1:exon:3-SPBC36B7.08c.1:exon:2	int_3863	144	144	0	0	0	72	3	1	A;A;A	AAAACUAACAC;UAAAACUAACA;CGAAAACAGGU	15;16;83	109;34;1	Awan_Short	6	8	7.12173	7.40426	1.4	9	5.33596	4.96035	GTACGAAAACAGGTCTTAAAAAAATAAGGCGAAAGCATGAATAGATGATATGATAGATGTCAATGTATTGTAAAACTAACACAAAAATCGCAG	AACUAAC	AACUAAC	15	109	AAAACAG	83	1	NA	No	YES	No	NA	No	SPBC36B7.08c_intron3	AACUAAC	13	13	YES	No
II	3332628	3332725	98	-1	SPBC17D1.03c	SPBC17D1.03c.1:exon:2-SPBC17D1.03c.1:exon:1	int_4097	9	9	0	0	0	7	2	1	A;A	AGUACUAACAU;CAGUACUAACA	16;17	8;1	Awan_Short	4	4	4.71497	5.24241	1.66667	0.833333	4.95471	5.14535	GTAAGTTGCTCTTTGATTTCTTATTCTATCTTTTTTAGTGCTCTGTTTCCTTTTCACTTTGTTTTTCTTTGTTACAGTACTAACATTTTACTGGATAG	UACUAAC	UACUAAC	16	8		NA	NA	NA	No	YES	No	NA	No	NA	NA	0	0	No	No
II	2343001	2343095	95	-1	SPBC24C6.10c	SPBC24C6.10c.1:exon:3-SPBC24C6.10c.1:exon:2	int_3843	47	47	0	0	0	29	2	1	A;A	GACGCUAACAU;UGACGCUAACA	14;15	45;2	Awan_Short	36	20	5.10941	4.85233	18.5	10.5	4.17581	3.46763	GTATGCAATTTATTCATAATTGTAAACTTGAATGTGCCTGGGATTCATTATCCTGGCTAAATAGTATTCCCGTTGACGCTAACATTTGGTGACAG	CGCUAAC	CGCUAAC	14	45		NA	NA	NA	No	YES	No	No	No	SPBC24C6.10c_intron2	CGCUAAC	12	13	YES	No
I	1135403	1135516	114	-1	SPAC56F8.05c	SPAC56F8.05c.1:exon:4-SPAC56F8.05c.1:exon:3	int_1379	70	70	0	0	0	28	3	1	A;A;A	GAUGCUAACUA;AUGUUUUAUUG;AGAUGCUAACU	18;30;19	58;7;5	Awan_Short	1498	1194	7.37865	7.7413	25.8448	36.2121	10.408	10.3596	GTAAGAATACTTAAACTTTATCAAATCATCGTCAAGATATCATATAAAGTGCACTGGGTCACAAAGCGAATGGTTGAATGTTTTATTGAGATGCTAACTATTTGTTAAATGCAG	UGCUAAC	UGCUAAC	18	58	GUUUUAU	30	7	NA	No	YES	No	NA	No	SPAC56F8.05c_intron3	UGCUAAC	16	34	YES	No
II	3105531	3105651	121	-1	SPBC1778.05c	SPBC1778.05c.1:exon:2-SPBC1778.05c.1:exon:1	int_4022	8	5	3	0	0	7	1	2	A	GGUAUUAACAA	9	8	Awan_Short;Awan_Long	9	4	4.54408	4.272	10	1.66667	2.01354	2.25955	GTAAGCATTTAGTGAATTTGAAGTTCATTCTTACTTCAAATCCAGTGGGTACACCTGTACTATTTTGGAGCTTAGATATATAAGTTTATTGTTGAAATATTCTGAGGTATTAACAAACTAG	UAUUAAC	UAUUAAC	9	8		NA	NA	NA	No	YES	No	NA	No	SPBC1778.05c_intron1	UAUUAAC	7	1	YES	No
I	580984	581083	100	-1	SPAC13A11.04c	SPAC13A11.04c.1:exon:3-SPAC13A11.04c.1:exon:2	int_1238	180	180	0	0	0	41	2	1	A;A	AUUACUAAUUC;AAUUACUAAUU	8;9	167;13	Awan_Short	7	5	4.15789	4.63815	2.66667	6	4.0143	4.07749	GTACGTTTAGTTGAAAACATAGCTATTGATTTAGCAACGAAACCTTTTTGCGAATATCGAGTTAGGATGCAATTCCCGAATACCAATTACTAATTCTTAG	UACUAAU	UACUAAU	8	167		NA	NA	NA	No	YES	No	NA	No	SPAC13A11.04c_intron2	UACUAAU	6	33	YES	No
III	1927680	1927799	120	-1	SPCC74.02c	SPCC74.02c.1:exon:3-SPCC74.02c.1:exon:2	int_5248	7	7	0	0	0	7	2	1	A;A	UUUGCUAAUAU;AUUUGCUAAUA	13;14	6;1	Awan_Short	2	4	4.05356	3.76041	3	5	4.39319	4.61285	GTATATTTTCTTTTGTTTATTCATTCTTTTTATTTTTATCTCTACTATACTGAGTTTTCCTATGTTCTCAATTTTTCTTTTTCTTTTTTGATTCGTTCAATTTGCTAATATTTATCTTAG	UGCUAAU	UGCUAAU	13	6		NA	NA	NA	No	YES	No	NA	No	NA	NA	0	0	No	No
I	2755104	2755191	88	1	SPAC6F6.12	SPAC6F6.12.1:exon:2-SPAC6F6.12.1:exon:3	int_589	12	12	0	0	0	9	2	1	A;A	GUCACUAACAC;CGUCACUAACA	13;14	10;2	Awan_Short	15	10	7.23798	7.62993	0.64	0.458333	5.54541	5.63512	GTATGCGTGCAATTAAATAGAAACTCGTTAGTGCAGTGATTCCGATGTCTTTGACTTTTCAATGATTCGTCACTAACACTTTTTGTAG	CACUAAC	CACUAAC	13	10		NA	NA	NA	No	YES	No	NA	No	SPAC6F6.12_intron2	UCACUAA;CACUAAC	12;11	1;1	YES	No
I	829425	829507	83	-1	SPAC2G11.11c	SPAC2G11.11c.1:exon:2-SPAC2G11.11c.1:exon:1	int_1308	279	279	0	0	0	42	2	1	A;A	CUUUCUAAUCC;CCUUUCUAAUC	11;12	261;18	Awan_Short	7	5	3.08791	2.29226	2.66667	6	2.85192	2.8807	GTAAGTTTTCTCTTTAATGACATACAAATACATGTTGCATGTATATGTAATTAATCCTGCCAAACCTTTCTAATCCAAATTAG	UUCUAAU	UUCUAAU	11	261		NA	NA	NA	No	YES	No	NA	No	SPAC2G11.11c_intron1	UUCUAAU	9	29	YES	No
III	652894	652999	106	1	SPCC5E4.06	SPCC5E4.06.1:exon:1-SPCC5E4.06.1:exon:2	int_4507	12	12	0	0	0	10	2	1	A;A	UAUAUUAAUAU;GUAUAUUAAUA	18;19	9;3	Awan_Short	10	4	4.53021	4.77227	3.66667	5	3.1054	2.76918	GTATGTTTAAACTCTTGCCGTTTTTATAACGAAACGCGTTCTCAATTGCGAGAGAAAAGGTTCTTTGTTGGTTGAAATTTGTATATTAATATTTTATTTTTAATAG	UUUUAAU	UAUUAAU	18	9		NA	NA	NA	No	No	No	No	No	SPCC5E4.06_intron1	UAUUAAU	16	3	YES	No
II	3578701	3578818	118	-1	SPBC887.18c	SPBC887.18c.1:exon:4-SPBC887.18c.1:exon:3	int_4166	26	26	0	0	0	19	3	1	A;A;A	UUCACUAACCU;UUUCACUAACC;UAUUUUCACUA	10;11;14	22;3;1	Awan_Short	15	4	2.74077	3.59201	8	2.5	4.22824	4.01808	GTAAGCCTATTCTTTAATAGGTTCTAAGGAAGTATTCAAAAGTGTAACCATTTAATTTTTATTAACGGAAATTTCCTTTTAACCACAATTTGGGTAATATTTTCACTAACCTCATTAG	CACUAAC	CACUAAC	10	22	UUUUCAC	14	1	NA	No	YES	No	NA	No	SPBC887.18c_intron3	CACUAAC	8	14	YES	No
II	3960697	3960780	84	-1	SPBC26H8.13c	SPBC26H8.13c.1:exon:2-SPBC26H8.13c.1:exon:1	int_4242	79	79	0	0	0	38	2	1	A;A	UUCACUAACAU;UUUCACUAACA	12;13	66;13	Awan_Short	32	29	4.96045	5.31938	16.5	10	4.45838	4.47687	GTAATTTTAAATTGCTTTGTTATATGAAAATTTCTACTTCTATAATTCGTTTCCGTAATCATCGTTTCACTAACATGAATTTAG	CACUAAC	CACUAAC	12	66		NA	NA	NA	No	YES	No	NA	No	SPBC26H8.13c_intron1	CACUAAC;UCACUAA	10;11	17;1	YES	No
I	3620258	3620370	113	-1	SPAC17G6.15c	SPAC17G6.15c.1:exon:4-SPAC17G6.15c.1:exon:3	int_1965	30	29	1	0	0	17	2	2	A;A	CAUAUUAACGA;ACAUAUUAACG	10;11	28;2	Awan_Short;Awan_Long	49	31	2.72523	2.43208	50	32	6.92504	6.83431	GTATGTAGTTATACGATACAAATCCGATCAAATGTTATATTATTTGATTAGTTATTTTTTTTGTTATTAAATATATTTTCAAATTAAAAAAAAAAACATATTAACGATTTTAG	UAUUAAC	UAUUAAC	10	28		NA	NA	NA	No	YES	No	No	No	SPAC17G6.15c_intron3	UAUUAAC	8	6	YES	No
I	3821034	3821187	154	-1	SPAC1F12.10c	SPAC1F12.10c.1:exon:2-SPAC1F12.10c.1:exon:1	int_2009	110	84	26	0	0	55	3	2	A;A;A	CUAACUAACGA;AGACCUAACUA;CCUAACUAACG	14;18;15	95;8;7	Awan_Short;Awan_Long	3	5	7.15582	7.1687	4	6	4.29207	4.79148	GTAAGTAAATTTTTGGAATGATGTGTTTGTTTTGTTTAAGTCGGCTTTTGAGCATTTGGCTTTCGAAATTCGAAATTGCCAAAGATCACTCATCATCATCTTTCATTTTACTATCTGAGCTTTCTTTAAAGACCTAACTAACGAACTGTTGAAG	AACUAAC	AACUAAC	14	95	ACCUAAC	18	8	NA	No	YES	No	NA	No	SPAC1F12.10c_intron1	AACUAAC;ACCUAAC	12;16	26;1	YES	No
III	2105577	2105685	109	-1	SPCC576.15c	SPCC576.15c.1:exon:2-SPCC576.15c.1:exon:1	int_5276	109	109	0	0	0	53	1	1	A	UUUGCUUACAC	13	109	Awan_Short	74	57	4.36219	4.70647	37.5	29	4.4471	4.39511	GTATGTATAAATAATGTTCATGCAGCTTGATGATGGATAGCTTACTGATTATTACAATCTTGTCTTTTTTCTTATTAAATGTTTTATTTTTTGCTTACACATAATTTAG	UACUGAU	UGCUUAC	13	109		NA	NA	NA	No	No	No	No	No	SPCC576.15c_intron1	UGCUUAC	11	10	YES	No
II	433013	433203	191	1	SPBC582.08	SPBC582.08.1:exon:1-SPBC582.08.1:exon:2	int_2419	210	195	15	0	0	38	4	2	A;A;A;A	UUUUCUAAUUA;AUUUUCUAAUU;UGAUUUUAGAC;UGUAUUAAGAA	12;13;60;127	193;15;1;1	Awan_Short;Awan_Long	185	138	9.97734	9.98165	31	17.375	7.32302	7.19316	GTAAGCATTTTAAGAAGAAAGAGTGAAGATCGTCGGACACAGAGACAATTCGCAGACTGTATTAAGAAATTTAGCAAAAATACTGCAACCCATTAAAGCTGCTAGGGTCTTGCTCGATAAAAAATGATTTTAGACTCCGCCATTCATTCTTTTTTCTTTTTATCTTTACACATTTTCTAATTATATTTTAG	UUCUAAU	UUCUAAU	12	193	UAUUAAG	127	1	NA	No	YES	No	YES	No	SPBC582.08_intron1	UUCUAAU	10	8	YES	No
II	4000857	4000962	106	-1	SPBC3B9.07c	SPBC3B9.07c.1:exon:2-SPBC3B9.07c.1:exon:1	int_4255	213	213	0	0	0	53	3	1	A;A;A	AAUGCUAACUA;AAAUGCUAACU;CUCCAAAAUAA	11;12;21	185;27;1	Awan_Short	128	138	5.80744	6.11929	43	139	8.23671	8.11415	GTATGAAATGCTTAGAAATTCGAGATTCTATGATGGATTTGTATCATGATAATTCAGTCGTGCAAAATTTTATACCAACTCCAAAATAAATGCTAACTATCACTAG	UGCUAAC	UGCUAAC	11	185	CCAAAAU	21	1	NA	No	YES	No	NA	No	SPBC3B9.07c_intron1	UGCUAAC	9	43	YES	No
I	2426280	2426413	134	1	SPAC6B12.08	SPAC6B12.08.1:exon:1-SPAC6B12.08.1:exon:2	int_523	127	106	21	0	0	33	2	2	A;A	UUUACUAAUCA;CUUUACUAAUC	10;11	118;9	Awan_Short;Awan_Long	3	5	5.36468	5.6673	4	1	4.3221	4.38482	GTATGAAAACTTGTTTTCAACTTAATCAATCAACATAGAATATAAATTTACAGCTTTTCGATCTGTGATTAAAACATAATCGTTTAAGTTGTGAAGAATTGATCGCCTTTGTGTATCTTTACTAATCATAACAG	UACUAAU	UACUAAU	10	118		NA	NA	NA	No	YES	No	No	No	SPAC6B12.08_intron1	UACUAAU	8	19	YES	No
I	1916156	1916318	163	1	SPAC110.03	SPAC110.03.1:exon:1-SPAC110.03.1:exon:2	int_406	46	43	3	0	0	33	3	2	A;A;A	CAUACUGACCG;UUUACACAUAC;AAAAUACAAGA	15;21;113	41;4;1	Awan_Short;Awan_Long	116	105	6.5775	7.04649	10.6364	13.25	6.94623	7.24754	GTGAGTTGATGTTTACGGAAGGTGAAGTTAAGCAATGCATAAAAAAATACAAGAATTGCTATCATCTAAAATGAAGTTTCTTTTGTCTATACATTCCCCTTTATTTCTTTCTTTCCAAAAATTGTTCTTTTGAGTTTTACACATACTGACCGTTTGAATGTAG	UACUGAC	UACUGAC	15	41	UACACAU	21	4	NA	No	YES	No	YES	No	SPAC110.03_intron1	UACACAU;UACUGAC	19;13	3;4	YES	No
I	2793253	2793352	100	-1	SPAC1805.11c	SPAC1805.11c.1:exon:2-SPAC1805.11c.1:exon:1	int_1785	90	90	0	0	0	46	9	1	A;A;A;A;A;A;A;A;A	UGAACUGACAC;ACAAUGAACUG;GAAACGAAAAC;GAAAUAGAAAC;CGAAAACAAUG;AACGAAAACAA;AGAAACGAAAA;AAAUAGAAACG;GAUGGGGAAUC	12;16;25;31;21;23;26;30;53	76;5;2;2;1;1;1;1;1	Awan_Short	1124	1031	8.85187	9.18457	62.5	93.8182	10.034	10.184	GTAAGTTCAACTTAAATGATTCACCATCTATAGTTAAATTGATGGGGAATCACTTAAATTATGAAATAGAAACGAAAACAATGAACTGACACATATTTAG	AACUGAC	AACUGAC	12	76	AAUGAAC	16	5	NA	No	YES	No	YES	No	SPAC1805.11c_intron1	AACUGAC	10	9	YES	No
I	5358081	5358192	112	-1	SPAC4D7.04c	SPAC4D7.04c.1:exon:2-SPAC4D7.04c.1:exon:1	int_2342	490	490	0	0	0	74	3	1	A;A;A	UUAACUAACCC;AUUAACUAACC;UACAUUAACUA	12;13;16	405;84;1	Awan_Short	17	10	5.13799	5.45986	9	11	3.7014	3.49071	GTAAGTTTAAAGAACATTAATAGAAGGTTAAACGTACCGTTTCTCCATGTTTTGCGCATTGGTATCCGTCTACGTTCTGCACAATTTGGTACATTAACTAACCCTGCGTAAG	AACUAAC	AACUAAC	12	405	CAUUAAC	16	1	NA	No	YES	No	No	No	SPAC4D7.04c_intron1	AACUAAC	10	86	YES	No
I	1696690	1696831	142	1	SPAC824.07	SPAC824.07.1:exon:1-SPAC824.07.1:exon:2	int_372	786	605	181	0	0	151	10	2	A;A;A;A;A;A;A;A;A;A	CAAACUAACAU;CCAAACUAACA;UUAAUUAACCA;AACAUUGACAA;UUUAAUUAACC;AACUAACAUUG;UAACCAAACUA;AUUAACCAAAC;CUCCGUAACAU;GCUCCGUAACA	17;18;26;11;27;15;21;23;37;38	649;112;10;6;4;1;1;1;1;1	Awan_Short;Awan_Long	34	44	7.28102	7.33133	3.88889	5	5.10381	5.69397	GTAAGTGAAGAGAATGAAATAACGACTTAAATACTGTTATCTGTGATTTCGGAAACATGATTTTCTCCTCCTGTTTTCCGAATTGTTTTGTTTGTGCGCTCCGTAACATTTAATTAACCAAACTAACATTGACAAACTCTAG	AACUAAC	AACUAAC	17	649	AAUUAAC	26	10	NA	No	YES	No	NA	No	SPAC824.07_intron1	AAUUAAC;AAACUAA;AACUAAC;CAUUGAC	24;16;15;9	3;6;198;1	YES	No
I	3485975	3486055	81	1	SPAC328.05	SPAC328.05.1:exon:5-SPAC328.05.1:exon:6	int_721	19	19	0	0	0	12	1	1	A	AUUACUGACUG	11	19	Awan_Short	33	20	5.98983	5.55627	2.26667	1.75	4.63362	4.24859	GTATGTATATAAGGACGCTTTTGTGGGATTAGTTTTCCGCATCATTTTAAGTTTTTTTTGGAGATTACTGACTGAATATAG	UACUGAC	UACUGAC	11	19		NA	NA	NA	No	YES	No	No	No	SPAC328.05_intron5	UACUGAC	9	9	YES	No
II	2924079	2924232	154	1	SPBC1703.05	SPBC1703.05.1:exon:1-SPBC1703.05.1:exon:2	int_2988	739	691	48	0	0	125	4	2	A;A;A;A	CGAACUAACAA;UCGAACUAACA;UAUUCGAACUA;UGAUUUCAAUA	11;12;15;28	694;41;3;1	Awan_Short;Awan_Long	105	76	6.1366	5.76683	21.2	11	6.14102	5.96008	GTAAGCACTTTATTTTATCTTTGGGCAGTCATATAGCTTAAATCGTTTTGATCGTACAATGTTTTGTATTTTCTTACTTATTGACACATACGATATGATGCATTCAATTAATTATATTTTGATTTCAATAAGTATTCGAACTAACAAGTTATAG	AACUAAC	AACUAAC	11	694	UUCGAAC	15	3	NA	No	YES	No	NA	No	SPBC1703.05_intron1	UUCGAAC;AACUAAC	13;9	1;152	YES	No
I	2799767	2799861	95	-1	SPAC1805.15c	SPAC1805.15c.1:exon:3-SPAC1805.15c.1:exon:2	int_1787	13	13	0	0	0	10	2	1	A;A	UGAACUAAUUC;AUGAACUAAUU	17;18	10;3	Awan_Short	1	3	0.805637	1.41938	2	4	2.39686	2.84914	GTAAGTTTTTTTTTTTTGCTATAAGCTAGTTTTTCTATGATTTATTATGCTTGCCAGTTTGTTTACTTACATGAACTAATTCTTTTTTCTAAAAG	AACUAAU	AACUAAU	17	10		NA	NA	NA	No	YES	No	NA	No	NA	NA	0	0	No	No
I	3909735	3909872	138	-1	SPAC323.02c	SPAC323.02c.1:exon:3-SPAC323.02c.1:exon:2	int_2028	331	298	33	0	0	72	2	2	A;A	GAUGCUAACUU;AGAUGCUAACU	13;14	296;35	Awan_Short;Awan_Long	83	82	8.03349	8.19177	4.66667	6.38462	7.5791	7.50419	GTAAGTCAAAATTATTTTATTTTTATGGAACGATGTGGCTATTGTGTTAATGCTTTTGTTTTTTGATTATCTTCGTACACCTGCCATTGTTTGGATTCCTTTTGTTGTAATTCGTTAAGATGCTAACTTCCTATACAG	UGCUAAC	UGCUAAC	13	296		NA	NA	NA	No	YES	No	NA	No	SPAC323.02c_intron2	UGCUAAC;AUGCUAA	11;12	170;2	YES	No
I	3335588	3335686	99	1	SPAC26A3.02	SPAC26A3.02.1:exon:1-SPAC26A3.02.1:exon:2	int_683	258	258	0	0	0	64	2	1	A;A	AUUGCUAACCA;AAUUGCUAACC	13;14	234;24	Awan_Short	37	23	3.20556	3.6818	38	24	4.7696	4.47789	GTACGTAATTTGAAATTTTGAAAATCATTCTACATTTTATTCCGTGAATTTGTTAACCAGGTATCCCAATTTAAGCAAAATTGCTAACCAAATATTTAG	UGCUAAC	UGCUAAC	13	234		NA	NA	NA	No	YES	No	NA	No	SPAC26A3.02_intron1	UGCUAAC	11	68	YES	No
III	1492155	1492233	79	-1	SPCC188.08c	SPCC188.08c.1:exon:3-SPCC188.08c.1:exon:2	int_5158	124	124	0	0	0	52	2	1	A;A	GUUACUAACGG;UGUUACUAACG	11;12	102;22	Awan_Short	22	15	4.39363	4.4928	3.83333	8	4.20146	4.01522	GTACGTGTCGGTGTGACCACTTAGTGTGAAAATTACTTATGACCGGGTTATTTACATTCATGTTACTAACGGGTCATAG	UACUAAC	UACUAAC	11	102		NA	NA	NA	No	YES	No	No	No	SPCC188.08c_intron2	UACUAAC	9	45	YES	No
II	4233980	4234080	101	-1	SPBC16G5.12c	SPBC16G5.12c.1:exon:6-SPBC16G5.12c.1:exon:5	int_4305	214	214	0	0	0	83	3	1	A;A;A	GUUGCUAACAA;GGUUGCUAACA;AAAUCCCAUAC	15;16;53	167;46;1	Awan_Short	19	20	2.71728	2.00909	2.5	5.25	3.06883	3.55565	GTAAGTCAAATTATCATTGTTTCCTACTTTTCCAATTTTCAAAATCCCATACTTTATTTATTAATCTTTTCATTTTATGGTTGCTAACAAATATAACGCAG	UGCUAAC	UGCUAAC	15	167	AUCCCAU	53	1	NA	No	YES	No	YES	No	SPBC16G5.12c_intron5	UGCUAAC;UUGCUAA	13;14	55;1	YES	No
III	147732	147867	136	-1	SPCC320.10	SPCC320.10.1:exon:2-SPCC320.10.1:exon:1	int_4883	87	69	18	0	0	45	3	2	A;A;A	CUUACUAACAA;UCUUACUAACA;UGUUCUUACUA	14;15;18	79;6;2	Awan_Short;Awan_Long	8	5	5.146	5.1034	9	2	6.01066	6.00001	GTATGTCTCAAATGTATTTGAATAGCCATGTAAAAAGACTTCGATTTTGGTGATGAAAGCGATGATTACTTGTTGTAATTCTATACGGCTCTTTATTATTTTAATAAAAACTGTTCTTACTAACAACTTATTGAAG	UACUAAC	UACUAAC	14	79	UUCUUAC	18	2	NA	No	YES	No	NA	No	SPCC320.10_intron1	UACUAAC;UUCUUAC	12;16	29;2	YES	No
II	2050359	2050451	93	-1	SPBC29A3.07c	SPBC29A3.07c.1:exon:2-SPBC29A3.07c.1:exon:1	int_3777	40	40	0	0	0	16	2	1	A;A	CUUGUUAACUU;UCUUGUUAACU	13;14	38;2	Awan_Short	10	7	1.15826	1.45007	5.5	4	3.83829	3.97256	GTACGTTATCTTAGGGAATGTATTAGCTACTATTAATTTTAATTTCTCCTTTCTAACGGCTTTTTAATATCTTCTTGTTAACTTTTTTTTTAG	UUCUAAC	UGUUAAC	13	38		NA	NA	NA	No	No	No	NA	No	SPBC29A3.07c_intron1	UGUUAAC	11	2	YES	No
II	848118	848262	145	1	SPBC36.04	SPBC36.04.1:exon:1-SPBC36.04.1:exon:2	int_2506	139	90	49	0	0	40	2	2	A;A	UAUACUAAUUG;GUAUACUAAUU	17;18	121;18	Awan_Short;Awan_Long	80	83	6.04107	5.73532	16.2	14	7.77218	7.96446	GTATGTTTTTGATATAGGGCGTTGTTTAATGGGTCTCGTTTTGCTAAACAATTTTGAAACGTCGAGGTTTCTCAATTGAATGGCAATCCTATACCTTTATTTCTTTTTAATTGCTTTCATGTATACTAATTGCAAATTTTTTAAG	UACUAAU	UACUAAU	17	121		NA	NA	NA	No	YES	No	No	No	SPBC36.04_intron1	AUACUAA;UACUAAU	16;15	2;67	YES	No
I	1728731	1728816	86	-1	SPAC664.12c	SPAC664.12c.1:exon:2-SPAC664.12c.1:exon:1	int_1536	18	18	0	0	0	15	3	1	A;A;A	UGUACUAACUA;UUGUACUAACU;CUAACUAAUAC	12;13;8	12;5;1	Awan_Short	17	15	2.75658	2.04839	18	8	2.33384	2.48634	GTATGTCTATACATAGCGTTTGCGAATCTGCCTTATTCAAGTATTTTACATCTTATGCTCTTTCTTTTGTACTAACTAATACGTAG	AACUAAU	UACUAAC	12	12	AACUAAU	8	1	NA	YES	No	No	NA	No	SPAC664.12c_intron1	UACUAAC	10	1	YES	No
III	194604	194693	90	1	SPCC1235.09	SPCC1235.09.1:exon:1-SPCC1235.09.1:exon:2	int_4401	35	35	0	0	0	23	2	1	A;A	UUCGUUAACAU;UUUCGUUAACA	24;25	30;5	Awan_Short	10	12	2.88363	3.08234	5.5	3.25	4.77809	4.82548	GTATGTTAAATAGTTGGTTTTTGTGAATCATAGTCGCTTCATCTCTCCTTTTTTTCGGTTTCGTTAACATTATCGTGTTTTTTGTTGTAG	CGUUAAC	CGUUAAC	24	30		NA	NA	NA	No	YES	No	No	No	SPCC1235.09_intron1	UCGUUAA;CGUUAAC	23;22	2;9	YES	No
II	1695809	1695923	115	1	SPBC19C2.10	SPBC19C2.10.1:exon:1-SPBC19C2.10.1:exon:2	int_2716	41	41	0	0	0	27	3	1	A;A;A	UUUGUUAACUA;UUAACUAAUUU;UUUUGUUAACU	12;8;13	29;9;3	Awan_Short	12	12	5.25792	5.74067	3.25	13	4.94845	4.77098	GTAAGTATTATCGTCCTAATGACATTCGTTACCAATTTGATGCCATAATTAAACGATTATTAGGCCTGCCTAACTTATCTTATATGACTCAATATTTTTGTTAACTAATTTTTAG	AACUAAU	UGUUAAC	12	29	AACUAAU	8	9	NA	YES	No	No	No	No	SPBC19C2.10_intron1	UGUUAAC;AACUAAU	10;6	1;2	YES	No
III	389219	389317	99	-1	SPCC1682.09c	SPCC1682.09c.1:exon:3-SPCC1682.09c.1:exon:2	int_4930	69	69	0	0	0	40	5	1	A;A;A;A;A	CUUACUAACUU;GCUUACUAACU;AUAGCUUACUA;AAAGGGAAUUC;AAAAGGGAAUU	9;10;13;33;34	55;8;2;2;2	Awan_Short	51	40	9.67094	9.77857	10.4	10.25	4.94319	5.0169	GTATGTATCTGTCGAATATTTGTTTAACTAAGCTGAAAGCTTATGTTTAAGATTGTTGAAAAGGGAATTCAAGATGTGTATAGCTTACTAACTTTTCAG	UACUAAC	UACUAAC	9	55	AGGGAAU	33	2	NA	No	YES	No	NA	No	SPCC1682.09c_intron2	UACUAAC;AGCUUAC	7;11	16;1	YES	No
II	4184186	4184319	134	-1	SPBC14F5.13c	SPBC14F5.13c.1:exon:2-SPBC14F5.13c.1:exon:1	int_4297	68	58	10	0	0	35	1	2	A	GUGACUGACUU	13	68	Awan_Short;Awan_Long	155	92	6.76883	6.54372	31.2	23.25	6.55481	6.3159	GTAAGTGATTGGAGTAAGCTCTCTCATAAATCCGTTGCTCTTTTGAAGGAAAATGATTTTTTTTATATTTAGAGCACTGGGACGGAATCTTCCTTTTTTTTACAATATTTCTCGGTGACTGACTTTTTTTAAAG	GACUGAC	GACUGAC	13	68		NA	NA	NA	No	YES	No	No	No	SPBC14F5.13c_intron1	GACUGAC	11	22	YES	No
I	4929101	4929248	148	-1	SPAC1B3.02c	SPAC1B3.02c.1:exon:4-SPAC1B3.02c.1:exon:3	int_2262	419	202	217	0	0	110	6	2	A;A;A;A;A;A	UUUACUAACAU;AUUUACUAACA;CUUAUUUACUA;CUUGUACACUU;UCUUCUUAUUU;GAUUAAUAUUG	11;12;15;23;55;95	294;89;33;1;1;1	Awan_Short;Awan_Long	87	64	5.51476	5.2652	44	65	5.4171	5.23575	GTATGAAAGAGGTGTTTTATTTCAATAGCGGCACGTAAATTATTACGATTAATATTGCGGTTAATTTCTTTTATATCGTCTCTTTATCTTCTTATTTCTTGTTCTTTTATGAAATTTTCTTGTACACTTATTTACTAACATTATCAAG	UACUAAC	UACUAAC	11	294	UAUUUAC	15	33	NA	No	YES	No	NA	No	SPAC1B3.02c_intron3	UACUAAC;UUACUAA;UAUUUAC	9;10;13	60;2;8	YES	No
II	187456	187580	125	1	SPBC1198.08	SPBC1198.08.1:exon:1-SPBC1198.08.1:exon:2	int_2376	10	6	4	0	0	7	2	2	A;A	AUGCCUAACAC;CAUGCCUAACA	11;12	9;1	Awan_Short;Awan_Long	241	161	7.25832	7.20931	26.8889	32.4	7.24118	6.92364	GTAAGTAAGGATCTTTCTTGAAGAAATTAAAGAAAAGTAGACAGTTGTTCAGAATTGCCAGAGGCAAGTCTTATTTCTTTATTTTATTGCAGATTTCAGAAAGCGACATGCCTAACACTTTATAG	GCCUAAC	GCCUAAC	11	9		NA	NA	NA	No	YES	No	No	No	SPBC1198.08_intron1	GCCUAAC	9	3	YES	No
II	4008820	4008936	117	-1	SPBC3B9.13c	SPBC3B9.13c.1:exon:3-SPBC3B9.13c.1:exon:2	int_4265	138	138	0	0	0	30	3	1	A;A;A	GGUACUAACUU;AGGUACUAACU;AUUAGGUACUA	12;13;16	99;33;6	Awan_Short	1580	966	5.35061	5.57829	40.5385	22.4884	10.8728	10.8313	GTAAGTATAAAATAGCGGTAGTAATTACTACAACTAGTGTTAAGTTATTTTTACTCATTATTTATTCCTTACTATATTGTTATTTTATTACGCAATTAGGTACTAACTTTTTTATAG	UACUAAC	UACUAAC	12	99	UAGGUAC	16	6	NA	No	YES	No	YES	No	SPBC3B9.13c_intron2	UACUAAC	10	1	YES	No
II	3058061	3058217	157	-1	SPBC13E7.10c	SPBC13E7.10c.1:exon:2-SPBC13E7.10c.1:exon:1	int_4013	72	56	16	0	0	35	3	2	A;A;A	AUAUCUAACAC;UAUAUCUAACA;UCGACUUAUAU	12;13;19	60;10;2	Awan_Short;Awan_Long	13	11	5.43842	5.34996	2.33333	4	3.87723	4.13252	GTAAGTTAGAAGGCAATCATCCAGCAATGCGGTGTTTTACAGTTCTGATGCAGTCACCTTTTTTTGTTCAGTCTGTGTTAAATTTTGGTTTGATCTTTTACTAATAGACACCTCTTCGTCCATATTTTTCATCGACTTATATCTAACACAGCTTTAG	AUCUAAC	AUCUAAC	12	60	GACUUAU	19	2	NA	No	YES	No	NA	No	SPBC13E7.10c_intron2	AUCUAAC;GACUUAU	10;17	33;1	YES	No
I	3465445	3465541	97	-1	SPAC3A11.04	SPAC3A11.04.1:exon:2-SPAC3A11.04.1:exon:1	int_1923	31	31	0	0	0	17	2	1	A;A	CAAACUAACUU;ACAAACUAACU	15;16	30;1	Awan_Short	0	0	2.23501	3.06739	0.5	1	2.12911	2.05414	GTAAGTTTTACTTTTTGATTTACCTTCTTCATTTTTTTTACTTTACTCAATTTCTTTACCTGTTATACTTTTTCACAAACTAACTTGTCCTTACTAG	AACUAAC	AACUAAC	15	30		NA	NA	NA	No	YES	No	No	No	SPAC3A11.04_intron2	AACUAAC	13	4	YES	No
I	4306039	4306187	149	1	SPAC25G10.06	SPAC25G10.06.1:exon:1-SPAC25G10.06.1:exon:2	int_867	202	192	10	0	0	64	4	2	A;A;A;A	AUUACUAACUU;GAUUACUAACU;AAUGAUUACUA;AUCCAGCAAGC	12;13;16;27	181;19;1;1	Awan_Short;Awan_Long	671	544	6.6361	6.6527	74.6667	68.125	9.95978	9.90166	GTAAGTTTGGGAAACTTGTCAGTTTATTGTTAAATTCAACATATTGTATTCACATAAATTGATTTGTGTTAAACGAATAAACATAAAAGATTCTAATTATTCCTCGCTTTTGTATATCCAGCAAGCAATGATTACTAACTTCTCTGTAG	UACUAAC	UACUAAC	12	181	UGAUUAC	16	1	NA	No	YES	No	NA	No	SPAC25G10.06_intron1	UACUAAC	10	78	YES	No
II	3399756	3399863	108	-1	SPBC13A2.01c	SPBC13A2.01c.1:exon:2-SPBC13A2.01c.1:exon:1	int_4122	100	100	0	0	0	21	2	1	A;A	UGUACUAAUCA;UUGUACUAAUC	15;16	98;2	Awan_Short	93	88	4.92438	5.58484	13.4286	8.9	6.17489	6.47465	GTAAGTTTTCATAAAATTCTGTTTATTTGCTCTTCAAGTTCATTACTTTCAAAGTTGTCTTGGAATGCAATCATAGATGCCCGACTTGTACTAATCAAATATTACCAG	UACUAAU	UACUAAU	15	98		NA	NA	NA	No	YES	No	No	No	SPBC13A2.01c_intron1	UACUAAU	13	23	YES	No
I	5383124	5383229	106	1	SPAC3G6.02	SPAC3G6.02.1:exon:1-SPAC3G6.02.1:exon:2	int_1122	232	232	0	0	0	81	4	1	A;A;A;A	UUUACUAACAU;GUUUACUAACA;GACGUUUACUA;UUGGCCUAAAG	13;14;17;27	191;39;1;1	Awan_Short	160	117	7.26227	7.37817	53.6667	39.3333	6.41396	6.34862	GTACGTTACAAATTATTTAGAGTGGCTTTCGAGTACTATTTATTCGATATGCTAATGTCTATGATTTTTTCGTTGGCCTAAAGACGTTTACTAACATAATGCTTAG	UACUAAC	UACUAAC	13	191	GGCCUAA	27	1	NA	No	YES	No	YES	No	SPAC3G6.02_intron1	UUACUAA;UACUAAC	12;11	1;20	YES	No
I	3884688	3884843	156	1	SPAC926.02	SPAC926.02.1:exon:1-SPAC926.02.1:exon:2	int_816	63	57	6	0	0	32	5	2	A;A;A;A;A	AAAACUAACAA;UAAAACUAACA;UAAUAUUAGUU;AACUAACAAGC;AGAAACAAAUA	11;12;86;9;72	52;7;2;1;1	Awan_Short;Awan_Long	8	5	3.89744	4.05432	4.5	6	5.36385	5.27715	GTATGTACAAAGCTATAATGGTGAATTTCAAAAACGTTTGAACATGATCATTCATACGAATTGTAATATTAGTTTTGAGAAACAAATAGAATTTACGCTTTTTTGCGCCGAGTTCTCAATACTTGAGCACGTGAAATTAAAACTAACAAGCAATAG	AACUAAC	AACUAAC	11	52	AUAUUAG	86	2	NA	No	YES	No	YES	No	SPAC926.02_intron1	AACUAAC;CUAACAA	9;7	6;1	YES	No
I	895408	895596	189	1	SPAC22H12.02	SPAC22H12.02.1:exon:1-SPAC22H12.02.1:exon:2	int_185	52	7	45	0	0	25	2	2	A;A	UGAACUUACAA;GCAUUAUACAG	11;94	51;1	Awan_Short;Awan_Long	123	120	8.80547	8.42811	5.16667	5.7619	4.09187	4.02395	GTATGAAAGCCATCTGATTCATTTGCTACGACCGAGGCGCGTTATTTGACCCAATGGTCAAGGTTAGGTGCAATTACAAAAAACTTTGGCATTATACAGGATGCTCGTACAATTGAATTTAGAAGAACAATAAAAAACAAAACTTTTTCTTGCAAGTATCTTGATGAACTTTGAACTTACAATATTTAG	AUCUGAU	AACUUAC	11	51	AUUAUAC	94	1	NA	No	No	No	NA	No	SPAC22H12.02_intron1	AUUAUAC;AACUUAC	92;9	1;2	YES	No
I	3649602	3649715	114	1	SPAC8C9.05	SPAC8C9.05.1:exon:1-SPAC8C9.05.1:exon:2	int_743	8	8	0	0	0	6	1	1	A	UUUACUAAUAC	14	8	Awan_Short	14	8	5.781	5.91122	2.5	9	4.50207	4.20313	GTAAGTATTAATCAATATATACTAAGTTTGGACGGATTTTATAATCGGTAATAAGAAAATAAATTATTAATAAACTCAATGTTTATGAACTTATTTACTAATACGAGTTTATAG	UACUAAU	UACUAAU	14	8		NA	NA	NA	No	YES	No	NA	No	SPAC8C9.05_intron1	UACUAAU	12	3	YES	No
I	4589324	4589409	86	1	SPAC12B10.09	SPAC12B10.09.1:exon:3-SPAC12B10.09.1:exon:4	int_935	164	164	0	0	0	41	2	1	A;A	GAUACUAAUUU;UGAUACUAAUU	10;11	142;22	Awan_Short	2	0	5.97159	5.85574	3	0.5	3.74544	3.69556	GTATGTGTTTGATTTTTTGATTAAACTAAAGAATTTTGCGCGTGAATCACTACCTTGATATACACTTTTGATACTAATTTGTTTAG	UACUAAU	UACUAAU	10	142		NA	NA	NA	No	YES	No	No	No	SPAC12B10.09_intron3	AUACUAA;UACUAAU	9;8	5;77	YES	No
I	1225726	1225810	85	1	SPAC10F6.10	SPAC10F6.10.1:exon:1-SPAC10F6.10.1:exon:2	int_274	237	237	0	0	0	79	6	1	A;A;A;A;A;A	AUUAAUAACAU;AUCAUUAAUAA;UUUUACUAGNN;CAUUAAUAACA;GAUCAUUAAUA;CAUUUUUACUA	13;16;2;14;17;5	177;36;12;7;4;1	Awan_Short	9	0	3.82408	3.50584	0.714286	0.2	6.00384	5.91	GTAAGTTCATATACTGAATAGCCAAAAGCACTTTGCATGAATTTTTGTTACCATTTTTCATGATCATTAATAACATTTTTACTAG	CAUUAAU	UAAUAAC	13	177	CAUUAAU	16	36	NA	No	No	YES	NA	No	SPAC10F6.10_intron1	CAUUAAU;UAAUAAC	14;11	6;12	YES	No
I	2315600	2315700	101	1	SPAC13G7.11	SPAC13G7.11.1:exon:2-SPAC13G7.11.1:exon:3	int_496	34	34	0	0	0	24	2	1	A;A	UUUGCUAACUU;UUUUGCUAACU	16;17	29;5	Awan_Short	4	3	4.30224	4.36664	0.833333	0.5	4.56476	4.58404	GTACGTATTTCTGTAACGTTAATATTGGTTTGCTTTTTTTAGAATTTCCGTTAGCCATTAAACTTATCACATTTCAGTTTTGCTAACTTAGCGTTGTTAAG	UGCUAAC	UGCUAAC	16	29		NA	NA	NA	No	YES	No	NA	No	SPAC13G7.11_intron2	UUGCUAA;UGCUAAC	15;14	1;9	YES	No
I	634972	635068	97	1	SPAC1F3.09	SPAC1F3.09.1:exon:1-SPAC1F3.09.1:exon:2	int_103	82	82	0	0	0	25	2	1	A;A	CUCGCUAACAU;ACUCGCUAACA	16;17	79;3	Awan_Short	10	16	3.77557	4.11178	2.75	3.4	3.18907	2.71883	GTAAGTATACATATATTTAACTACTTCAACTCAGTTTGTGAACGAGATTGAAAAATTTTCAGTACGTCTTGCAACTCGCTAACATAGATTCGAATAG	CGCUAAC	CGCUAAC	16	79		NA	NA	NA	No	YES	No	No	No	SPAC1F3.09_intron1	CGCUAAC	14	3	YES	No
II	1891396	1891542	147	-1	SPBC3H7.01	SPBC3H7.01.1:exon:3-SPBC3H7.01.1:exon:2	int_3748	87	79	8	0	0	24	3	2	A;A;A	GGCGCUAAUUA;AGGCGCUAAUU;UUGGACUAUAG	19;20;29	85;1;1	Awan_Short;Awan_Long	163	126	8.69545	8.73675	7.80952	18.1429	5.94859	5.94711	GTATGTCAATTCGTGACTGTAAGTGAAGGATTACTTCATTATCTATCTATTTTACAGCATTATAAACTTTTTAGTATCCGGATTGTTAGCTAAAAAGATTATGTTTTACAATTGGACTATAGGCGCTAATTAGTTTGTCGAATTTAG	CGCUAAU	CGCUAAU	19	85	GGACUAU	29	1	NA	No	YES	No	YES	No	SPBC3H7.01_intron2	CGCUAAU	17	28	YES	No
I	727732	727845	114	-1	SPAC22G7.01c	SPAC22G7.01c.1:exon:3-SPAC22G7.01c.1:exon:2	int_1273	95	95	0	0	0	36	3	1	A;A;A	UUUUCUAACUG;UUUUUCUAACU;UUUGUUCAUUA	11;12;40	84;10;1	Awan_Short	75	53	4.29748	4.8788	25.3333	9	6.00484	5.84721	GTATGTGTTTTAATATTAGTAAAGCTATAGTTTCGTAATCCGCCGTATTAGTATTGTATCAAAATTGTTTGTTCATTATCTTTGAAACTTTTATATTTTTCTAACTGTACCTAG	UUCUAAC	UUCUAAC	11	84	UGUUCAU	40	1	NA	No	YES	No	NA	No	SPAC22G7.01c_intron2	UUCUAAC	9	19	YES	No
II	1286316	1286447	132	1	SPBC3D6.09	SPBC3D6.09.1:exon:1-SPBC3D6.09.1:exon:2	int_2606	21	21	0	0	0	14	2	1	A;A	AAGACUAACGU;AAAGACUAACG	11;12	19;2	Awan_Short	2	1	6.51597	6.19276	3	0.666667	4.31248	4.25637	GTATGTAATCTATATAACTATATAACCATATTGAAGGGCTTGTATGATGAAAGAATTTATTATATAATTGCCAATTTTATTTTCTTCTGGAAACACTTTGTATATGAATGAATAAAGACTAACGTTACTTAG	GACUAAC	GACUAAC	11	19		NA	NA	NA	No	YES	No	No	No	SPBC3D6.09_intron1	GACUAAC	9	3	YES	No
I	346440	346543	104	-1	SPAC12G12.02	SPAC12G12.02.1:exon:2-SPAC12G12.02.1:exon:1	int_1186	44	44	0	0	0	26	3	1	A;A;A	AAAACUAACUU;CGGUUUCAGUG;GAAAACUAACU	12;63;13	37;6;1	Awan_Short	164	117	4.42993	4.49042	165	59	7.78708	7.63669	GTGTGTAATTTTTTTGCTGGTTTAAAAACATCTGCGGTTTCAGTGTGTAATAAATATTACCTTCCTTTTTATGTTAATGAATAAGAAAACTAACTTCCTTTAAG	AACUAAC	AACUAAC	12	37	GUUUCAG	63	6	NA	No	YES	No	YES	No	SPAC12G12.02_intron1	AACUAAC	10	4	YES	No
I	2280883	2280991	109	1	SPAC4G9.14	SPAC4G9.14.1:exon:3-SPAC4G9.14.1:exon:4	int_481	66	66	0	0	0	29	3	1	A;A;A	UAUGCUAACGC;UUAUGCUAACG;GUACACCAAUU	12;13;26	57;8;1	Awan_Short	0	3	2.6073	2.98658	1	1.33333	-16.6096	2.7287	GTAAGAAAAACTACTCTTAATGATTAAATTCAGTATCAAAGTTCACAATGACTTTTGATACCAAGTTTGATTATGTGTACACCAATTTTTTATGCTAACGCGAATCTAG	UGCUAAC	UGCUAAC	12	57	ACACCAA	26	1	NA	No	YES	No	YES	No	SPAC4G9.14_intron3	UGCUAAC	10	20	YES	No
III	527666	527750	85	1	SPCP31B10.04	SPCP31B10.04.1:exon:1-SPCP31B10.04.1:exon:2	int_4475	182	182	0	0	0	52	3	1	A;A;A	AACACUAACCU;UAACACUAACC;GCAUAACACUA	8;9;12	169;12;1	Awan_Short	37	28	4.28802	3.57984	7.6	9.66667	5.74913	5.48216	GTATGTTCTAATGAGTTTTTTGCTTTGTTTGCTAACCAGATTTTCTTTTTTTTTTTCATTCACTAAGCATAACACTAACCTATAG	CACUAAC	CACUAAC	8	169	AUAACAC	12	1	NA	No	YES	No	NA	No	SPCP31B10.04_intron1	ACACUAA;CACUAAC	7;6	1;28	YES	No
II	516655	516726	72	1	SPBC1685.09	SPBC1685.09.1:exon:2-SPBC1685.09.1:exon:3	int_2439	240	240	0	0	0	68	2	1	A;A	CAUAUUAACUA;GCAUAUUAACU	10;11	191;49	Awan_Short	212	281	5.22793	5.40426	19.3636	282	10.0257	10.2571	GTAAGAGAATTTTGCTGTAACTTTCTTTTAAGTTTGCAACATCTGTTTCCGACAGCATATTAACTAGTTTAG	UAUUAAC	UAUUAAC	10	191		NA	NA	NA	No	YES	No	No	No	SPBC1685.09_intron2	UAUUAAC	8	92	YES	No
II	2920834	2920918	85	-1	SPBC1703.03c	SPBC1703.03c.1:exon:2-SPBC1703.03c.1:exon:1	int_3973	2	2	0	0	0	2	1	1	A	UACGCUAACUC	14	2	Awan_Short	111	81	2.13602	3.65023	37.3333	16.4	5.79052	5.63541	GTATGTTTAAACTTTTAGGAATAGTTGTCATAGCATCTATGAAATGTTATCTTAAACAGCAAAGTACGCTAACTCTTCTAATTAG	UUCUAAU	CGCUAAC	14	2		NA	NA	NA	No	No	No	No	No	SPBC1703.03c_intron1	CGCUAAC	12	2	YES	No
I	976138	976244	107	-1	SPAC222.14c	SPAC222.14c.1:exon:4-SPAC222.14c.1:exon:3	int_1340	6	6	0	0	0	5	3	1	A;A;A	AUUACUAACCA;CAUUACUAACC;GAUCAAUAUUU	10;11;33	4;1;1	Awan_Short	14	11	2.80394	3.31815	7.5	6	5.38247	5.34712	GTAAGATTTTAATGCGAACTAATTTGTTACTATTAGTTACACATTAGTATTTCCTTTACTCATAATTGATCAATATTTTCTTTTGGAGTCATTACTAACCAACCTAG	UACUAAC	UACUAAC	10	4	UCAAUAU	33	1	NA	No	YES	No	YES	No	NA	NA	0	0	No	No
III	2236514	2236636	123	-1	SPCC1919.13c	SPCC1919.13c.1:exon:2-SPCC1919.13c.1:exon:1	int_5324	83	59	24	0	0	28	4	2	A;A;A;A	AUCGCUAAUUA;UAUCGCUAAUU;CUAAUUAAUUC;GUUCAUAAUAG	11;12;7;55	73;7;2;1	Awan_Short;Awan_Long	13	6	3.6809	3.53214	3.5	1.4	3.12995	2.97924	GTAAGTTTGAAGTTAAAGTTTTTTATTCGTAAATAATTTAAAAAATAAATTTGGAAACGCCGTTCATAATAGCTTTTATTACTTTTAATGAGACATATCTCGAATATCGCTAATTAATTCTAG	CGCUAAU	CGCUAAU	11	73	AAUUAAU	7	2	NA	YES	YES	No	NA	No	SPCC1919.13c_intron1	AAUUAAU;CGCUAAU	5;9	1;19	YES	No
III	1348239	1348368	130	-1	SPCC338.15	SPCC338.15.1:exon:4-SPCC338.15.1:exon:3	int_5140	90	83	7	0	0	44	3	2	A;A;A	AGUACUAACGU;GAGUACUAACG;UUUCAAGAGUA	8;9;15	70;16;4	Awan_Short;Awan_Long	89	43	4.6569	4.0712	10	14.6667	6.07148	5.48287	GTAAGTTTTTTGTTTGTATTTAAAAAGCCTTTATTGATATTATGTCATAATTTAATTTTAGCAAGTATATTGTTTGAAGCGTACTTGAGCAGCACAATATTTTATCTCTTTCAAGAGTACTAACGTTTAG	UACUAAC	UACUAAC	8	70	UCAAGAG	15	4	NA	No	YES	No	NA	No	SPCC338.15_intron3	UACUAAC;GUACUAA	6;7	23;2	YES	No
II	3645051	3645185	135	-1	SPBP8B7.07c	SPBP8B7.07c.1:exon:3-SPBP8B7.07c.1:exon:2	int_4181	4	3	1	0	0	4	1	2	A	AGUACUAACAG	13	4	Awan_Short;Awan_Long	9	4	3.34306	3.49737	3.33333	5	4.27215	3.33201	GTAAACAAGTCTATTATGTTTTCGTAAAACAGATTTACAATCTGGCGAATTTGCTTATCGAGCTTTCAATTACAAACTCAATTTGTTCGTGAAAAGCGACTACTCATTTTAACTTAGTACTAACAGGCTTTTTAG	UACUAAC	UACUAAC	13	4		NA	NA	NA	No	YES	No	NA	No	NA	NA	0	0	No	No
I	1043513	1043595	83	-1	SPAC23C4.09c	SPAC23C4.09c.1:exon:4-SPAC23C4.09c.1:exon:3	int_1353	364	364	0	0	0	54	2	1	A;A	GUGUCUAAUUU;UGUGUCUAAUU	10;11	310;54	Awan_Short	45	33	4.67287	4.81582	2.19048	2	5.51299	5.34537	GTAAGTGTGATTTCATTTTCTGCGGCGGATAATAATTTAATATCTGTTTACGAATAATGTAAACATGTGTCTAATTTGTGTAG	GUCUAAU	GUCUAAU	10	310		NA	NA	NA	No	YES	No	NA	No	SPAC23C4.09c_intron3	GUCUAAU;UGUCUAA	8;9	102;2	YES	No
III	1861727	1861828	102	-1	SPCC1223.10c	SPCC1223.10c.1:exon:2-SPCC1223.10c.1:exon:1	int_5237	53	53	0	0	0	25	1	1	A	AAUACUUAUUU	19	53	Awan_Short	29	30	7.02499	7.28028	30	31	4.7399	4.97924	GTACGTTGCCCATTTATTTTTAGAGACAGTGTATATCTCTGTTGCAAACTATGAACATCATACTTTCTCCAGGCAGAATACTTATTTCTTTTTTGTTTATAG	UAUGAAC	UACUUAU	19	53		NA	NA	NA	No	No	No	No	YES	SPCC1223.10c_intron1	UACUUAU	17	12	YES	No
I	5372399	5372502	104	1	SPAC4D7.11	SPAC4D7.11.1:exon:2-SPAC4D7.11.1:exon:3	int_1119	119	119	0	0	0	46	2	1	A;A	UGUAUUAACAU;AUGUAUUAACA	14;15	106;13	Awan_Short	5	3	2.13448	1.28879	6	4	2.27115	1.826	GTAAGTTGTTCCAGTATTTAGTTTATTTTTCATTATACAAAAGCCAGAGATGCTATGTTCATGATTTTGCTTTTTTCTAGTCATGTATTAACATAAATTGCTAG	UAUUAAC	UAUUAAC	14	106		NA	NA	NA	No	YES	No	NA	No	SPAC4D7.11_intron2	UAUUAAC	12	26	YES	No
II	4127997	4128103	107	-1	SPBC1861.01c	SPBC1861.01c.1:exon:3-SPBC1861.01c.1:exon:2	int_4290	79	79	0	0	0	29	3	1	A;A;A	AUUACUAAUUA;AAUUACUAAUU;UAAAAUUACUA	13;14;17	73;5;1	Awan_Short	24	21	7.16149	7.51079	2.5	3.14286	6.85017	6.78206	GTAAGGTTCTATCTACGCATCACAGATTTTTATTTTACAACTCCTCAAATACTCTACTGTTACTTTCCGTTTCATTTCATTGATAAAATTACTAATTATACATACAG	UACUAAU	UACUAAU	13	73	AAAUUAC	17	1	NA	No	YES	No	NA	No	SPBC1861.01c_intron2	UACUAAU;UUACUAA	11;12	13;1	YES	No
I	1578657	1578792	136	1	SPAC23H4.16c	SPAC23H4.16c.1:exon:2-SPAC23H4.16c.1:exon:3	int_345	225	171	54	0	0	79	2	2	A;A	GGUACUAACUA;UGGUACUAACU	11;12	156;69	Awan_Short;Awan_Long	15	17	4.93188	5.07169	8	9	4.54832	4.27826	GTATGTGTAAAGAGAAAAAGAAAGCAGTTTATTTTTTTTTGTTTCGATACGTCAATTTTCGAACGAAACTTTTGTGATTGAATTTTTTTTTTGCCATAACAAATGCAAGTTGTTTGTTGGTACTAACTATGCATAG	UACUAAC	UACUAAC	11	156		NA	NA	NA	No	YES	No	NA	No	SPAC23H4.16c_intron2	UACUAAC	9	25	YES	No
I	1512199	1512345	147	-1	SPAC5D6.01	SPAC5D6.01.1:five_prime_UTR:2-SPAC5D6.01.1:exon:1	int_1473	25	17	8	0	0	11	2	2	A;A	AAAACUAACGC;GAAAACUAACG	16;17	24;1	Awan_Short;Awan_Long	362	298	9.09468	9.16807	9.30769	14.2381	8.08499	8.1116	GTATGAAATATTAAATATTACAAGATGTGAGCGGAAGTCTATTGGTACATTTATTCTTCAGTGAATACTTGAACCCAATGGGTGGAACCTTTTTTTCTTGAAATCTTTAAACAAGACACTCAAGAAAACTAACGCGCTTCTCGTCAG	AACUAAC	AACUAAC	16	24		NA	NA	NA	No	YES	No	NA	No	SPAC5D6.01_intron1	AACUAAC	14	4	YES	No
III	1623731	1623838	108	1	SPCC777.14	SPCC777.14.1:exon:1-SPCC777.14.1:exon:2	int_4699	27	27	0	0	0	14	2	1	A;A	AGAUCUAACCU;AAGAUCUAACC	13;14	24;3	Awan_Short	9	9	3.94253	3.49737	1.25	2	4.52959	4.60391	GTAAGTCTAAATAAACGCCAAATTGCTTATAATTCCAAAAATATGGAAATTGAATTCTTCTTCTCATTACTTTTGTACTCTTTTTTCAAGATCTAACCTTTAAAATAG	AUCUAAC	AUCUAAC	13	24		NA	NA	NA	No	YES	No	NA	No	SPCC777.14_intron1	AUCUAAC	11	22	YES	No
I	4426111	4426198	88	-1	SPAC16.02c	SPAC16.02c.1:exon:8-SPAC16.02c.1:exon:7	int_2148	22	22	0	0	0	16	2	1	A;A	AGUGUUAACAC;CAGUGUUAACA	13;14	20;2	Awan_Short	0	0	4.04534	4.33715	1	1	0.166044	-16.6096	GTAAGACAATTTTATACATTTAATGACCTTTGCGTCAATGCATGATTTTTTTCATATATCTATATTTCAGTGTTAACACTTTTCATAG	UGUUAAC	UGUUAAC	13	20		NA	NA	NA	No	YES	No	No	No	SPAC16.02c_intron7	UGUUAAC	11	9	YES	No
I	2193164	2193288	125	-1	SPAC1783.04c	SPAC1783.04c.1:exon:2-SPAC1783.04c.1:exon:1	int_1642	16	15	1	0	0	11	1	2	A	UUUACUAAUAC	14	16	Awan_Short;Awan_Long	120	75	5.21706	5.11091	40.3333	76	5.31545	4.91192	GTATGTTGCTTATTTATGGTTTTCCTTCTTTTATTTTAACTTTTCACTTAAAAAAAAAGTGGGATTAAAAAAAAAATTAAATATTATAATCGTACAAAGGCTCATTTACTAATACGTTTAAACAG	UACUAAU	UACUAAU	14	16		NA	NA	NA	No	YES	No	NA	No	SPAC1783.04c_intron1	UACUAAU	12	1	YES	No
II	3805928	3806243	316	1	SPBC21C3.05	SPBC21C3.05.1:exon:1-SPBC21C3.05.1:exon:2	int_3254	1	1	0	0	0	1	1	1	A	UUCGCUAACUA	174	1	Awan_Short	10	4	7.48533	7.26438	2.75	1	3.92545	3.3168	GTATGTTTAAAAACCACTGAATTCTGAAAATTTGAGTGCTGAATGTCAATTATAATTACCGATGAATTAATCGTGTAAAGTAAGACATGTACGTATGTTACATATTATTGAAGTTTATTAGTAGTTGCTGTTAAATTCGCTAACTATAACAACTAAAATAACAACAATAATAAATGAAAAGGATTTGCTTTCTACTTCCTTGTTTGCTGTTTTGCATGTTACACTAATTGGACATCTTTTTTTTACCCTGTCAATCACCTTGAAGCTTCCTCCTCAAACTCTTTGCGATGATATTTCTATTGCTAATCTCTTATAG	UGCUAAU	CGCUAAC	174	1		NA	NA	NA	No	No	No	No	No	SPBC21C3.05_intron1	CGCUAAC	172	1	YES	No
II	3252800	3252952	153	-1	SPBC25H2.18	SPBC25H2.18.1:exon:3-SPBC25H2.18.1:exon:2	int_4076	30	23	7	0	0	15	3	2	A;A;A	CAUGCUAACAA;ACAUGCUAACA;CUUGCCGACAC	12;13;22	22;6;2	Awan_Short;Awan_Long	2	6	4.51041	4.40991	0.25	0.636364	3.55187	4.05622	GTACGAAAAAAAACATTATGCTGGTTAATTGATGTCCGTCAAAAAAAATCGCATGTCTTTTAATTTTCGGACCAACTTTTTAAAACGGTGATTTCAATCCGTTGTTTAATAAGCGGTTTAAATTCTTGCCGACACATGCTAACAATATTCAAG	UGCUAAC	UGCUAAC	12	22	UGCCGAC	22	2	NA	No	YES	No	NA	No	SPBC25H2.18_intron2	UGCUAAC	10	9	YES	No
II	1505678	1505760	83	1	SPBC1215.01	SPBC1215.01.1:exon:1-SPBC1215.01.1:exon:2	int_2682	12	12	0	0	0	9	2	1	A;A	UAAGCUAACAU;UUAAGCUAACA	14;15	11;1	Awan_Short	13	16	1.32238	2.09962	7	5.66667	4.54446	4.16527	GTACGTTAAGTTAACATATACACAAATTGCACGTTTTGCAATTGAACTGTCGTTTTTTACATTAAGCTAACATAATCACTTAG	AGCUAAC	AGCUAAC	14	11		NA	NA	NA	No	YES	No	No	No	SPBC1215.01_intron1	AGCUAAC	12	9	YES	No
I	4861029	4861186	158	-1	SPAC4F10.14c	SPAC4F10.14c.1:exon:2-SPAC4F10.14c.1:exon:1	int_2240	260	234	26	0	0	48	3	2	A;A;A	UUAAUUAACUU;CUUAAUUAACU;UUAACUUAUCA	16;17;12	237;13;10	Awan_Short;Awan_Long	94	199	8.94745	9.11171	2.11111	6.06061	7.45206	8.04038	GTATGTTCGAATGCATCCCCGTGTTTTGAAGTTGACACCAGCTCTAAGAAATGCCTTGAACGGTTTCAAAGTGGTTCCACTGTAATTGATGCTGGCTATTGAAAACACAGTTGTACTTTTTTCATAGAGAACTGCTTAATTAACTTATCATTGTATAG	AAUUAAC	AAUUAAC	16	237	AACUUAU	12	10	NA	YES	YES	No	NA	No	SPAC4F10.14c_intron1	AACUUAU;AAUUAAC	10;14	9;210	YES	No
III	671167	671272	106	-1	SPCC16C4.06c	SPCC16C4.06c.1:exon:2-SPCC16C4.06c.1:exon:1	int_5020	4	4	0	0	0	3	2	1	A;A	GUUGCUAACGA;AUAAGAAAGCG	14;25	2;2	Awan_Short	3	6	4.23253	4.74673	2	7	2.9661	2.8824	GTATGGTTTAGAAGGTATTTTAAATAAATCAACGAAAATTTAGCAGAGAACAGTAAATAAAGAAGCAAAGATTGATAAGAAAGCGGTTGCTAACGAAAAGAATTAG	UGCUAAC	UGCUAAC	14	2	AAGAAAG	25	2	NA	No	YES	No	No	No	SPCC16C4.06c_intron1	UGCUAAC	12	1	YES	No
II	4331556	4331640	85	-1	SPBC16C6.02c	SPBC16C6.02c.1:exon:4-SPBC16C6.02c.1:exon:3	int_4331	124	124	0	0	0	47	2	1	A;A	GUUACUAACCA;AGUUACUAACC	13;14	82;42	Awan_Short	11	3	6.71429	6.70085	12	4	4.37549	2.79283	GTAGGGATCAAATATGAATATAGAATAAAACAGCACTTAGGACAATATAACGTTGTTTTAGAGCAGTTACTAACCATATTTATAG	UACUAAC	UACUAAC	13	82		NA	NA	NA	No	YES	No	No	No	SPBC16C6.02c_intron3	UACUAAC	11	21	YES	No
II	1794322	1794492	171	1	SPBC18H10.14	SPBC18H10.14.1:exon:1-SPBC18H10.14.1:exon:2	int_2742	61	39	22	0	0	24	5	2	A;A;A;A;A	GUUACUAAUGA;UGUUACUAAUG;UUUUUUUAGAA;ACAUAACAUUU;AUACGACAUAA	14;15;28;45;50	43;15;1;1;1	Awan_Short;Awan_Long	24	21	9.88911	10.3128	5	2.44444	8.74572	8.92111	GTATGTGCTAAACGAAGAGAAGTTCATGACATCTTCGGAATCGATTTCTTGCACGATTTATTGTGTTGTCGAACTTGTTCCGTGTACAGAATGTTAATGATACTGTATCTCTCGATACGACATAACATTTGTTTCTTTTTTTTAGAATGTGTTACTAATGATTTTTTTTAG	UACUAAU	UACUAAU	14	43	AUAACAU	45	1	NA	No	YES	No	NA	No	SPBC18H10.14_intron1	UACUAAU	12	8	YES	No
II	1500987	1501087	101	1	SPBC11B10.09	SPBC11B10.09.1:exon:3-SPBC11B10.09.1:exon:4	int_2680	27	27	0	0	0	20	2	1	A;A	GUCGCUAACCG;UGUCGCUAACC	9;10	25;2	Awan_Short	34	32	6.9071	7.16391	5.83333	16.5	5.29161	5.19523	GTATATTTTTTTTCTTACTTGGCTGTATGACTTTATTCCCAAAAAATTTGGAATATTGACTGACGGTCTTTCAGCATTAATTTGTGTCGCTAACCGTTTAG	CGCUAAC	CGCUAAC	9	25		NA	NA	NA	No	YES	No	NA	No	SPBC11B10.09_intron4	CGCUAAC	7	5	YES	No
I	3241571	3241654	84	-1	SPAC6G9.01c	SPAC6G9.01c.1:exon:3-SPAC6G9.01c.1:exon:2	int_1871	102	102	0	0	0	48	4	1	A;A;A;A	AAUACUAAUAC;UAUACUAAUAC;UAAUACUAAUA;CUAUACUAAUA	10;16;11;17	61;28;9;4	Awan_Short	46	41	2.4426	3.27498	15.6667	21	4.51718	4.17673	GTAAGTAACTTATTCATTGCATTTAAAAACTTTTCCATGGCATTTTTTCTCTTGCTAGCTCTATACTAATACTAATACCTTAAG	UACUAAU	UACUAAU	10	61	UACUAAU	16	28	NA	No	YES	No	No	No	SPAC6G9.01c_intron2	UACUAAU;UACUAAU	8;14	12;7	YES	No
II	259705	259804	100	-1	SPBC800.04c	SPBC800.04c.1:exon:2-SPBC800.04c.1:exon:1	int_3403	167	167	0	0	0	65	4	1	A;A;A;A	UUUACUAACUA;AUUUACUAACU;GCGAUUUACUA;ACGAUAAAGAG	12;13;16;26	139;22;3;3	Awan_Short	2805	2614	8.28045	9.00786	175.375	174.333	12.1596	12.1904	GTAAGTATTGTTTAGCTGATACTTTGGTTTGGCACGCATAATATGCCTCCAGTATCATGCAAGTCGTACGATAAAGAGCGATTTACTAACTATGAAATAG	UACUAAC	UACUAAC	12	139	GAUAAAG	26	3	NA	No	YES	No	YES	No	SPBC800.04c_intron1	UACUAAC	10	22	YES	No
I	4859814	4859930	117	-1	SPAC4F10.13c	SPAC4F10.13c.1:exon:2-SPAC4F10.13c.1:exon:1	int_2239	106	106	0	0	0	38	2	1	A;A	UGUACUAACAA;UUGUACUAACA	18;19	90;16	Awan_Short	39	14	6.2733	6.08234	20	7.5	4.51299	3.89996	GTAAGTTTTTTTCCTGGGATTTACCACATTTTACGATTTTCAAAAAATTGCGTTTCTGATACGCTTGAAATACTTTGAGTTTCAAATTGCCTTGTACTAACAACTTATGTTTTGTAG	UACUAAC	UACUAAC	18	90		NA	NA	NA	No	YES	No	No	No	SPAC4F10.13c_intron1	UACUAAC	16	4	YES	No
II	2490048	2490222	175	-1	SPBC557.03c	SPBC557.03c.1:five_prime_UTR:2-SPBC557.03c.1:exon:2	int_3875	37	22	15	0	0	20	2	2	A;A	UUUGCUAACAU;GUUUGCUAACA	9;10	36;1	Awan_Short;Awan_Long	7	4	6.74764	6.93376	0.666667	1.66667	2.21502	2.41937	GTAAGTAATTTGTTTTGGCCGTGAAAAATTATCATTTGATCTTTGATTCCAAATTCAGGTGCTGTTATCGTTGCAGTGTTGTTTATAGTCTATTGACTCATTGTATCATTTCCCTTCGCCCTTTTGGAACAAATGGCTTTATAAATTTATCATTTTTCGTTTGCTAACATACTAG	UGCUAAC	UGCUAAC	9	36		NA	NA	NA	No	YES	No	NA	No	SPBC557.03c_intron2	UGCUAAC;UUGCUAA	7;8	11;1	YES	No
I	4870654	4870822	169	1	SPAC4F10.18	SPAC4F10.18.1:exon:2-SPAC4F10.18.1:exon:3	int_1003	46	33	13	0	0	35	6	2	A;A;A;A;A;A	AUGAUUAACCU;UAAACUAAUGA;AAUGAUUAACC;UUAAACUAAUG;UCCUCUAAACG;AGUGCUAAUGA	11;18;12;19;32;65	20;14;5;3;2;2	Awan_Short;Awan_Long	6	2	5.67505	5.88847	1.75	0.333333	4.53496	4.79283	GTATGTAAGATATCTGAATGTTACGACGAATGGTAATTTACGTATTACTCATTTCTTCTTTTCTGTTTTCCTAAGTTACAATATTTGAGAAAACCTCAGTGCTAATGAAACAATTATCTTCAAATAGCATTCCTCTAAACGTTTTAAACTAATGATTAACCTTATACAG	AACUAAU	GAUUAAC	11	20	AACUAAU	18	14	NA	No	No	No	No	No	SPAC4F10.18_intron2	UGCUAAU;AACUAAU;GAUUAAC	63;16;9	1;4;4	YES	No
I	4825755	4825917	163	-1	SPAC20G4.06c	SPAC20G4.06c.1:exon:3-SPAC20G4.06c.1:exon:2	int_2234	392	267	125	0	0	45	3	2	A;A;A	UUCACUAAUUU;UUUCACUAAUU;AAGUCCAAUAU	16;17;121	380;11;1	Awan_Short;Awan_Long	154	85	7.73584	7.8519	77.5	43	7.99842	7.43283	GTAAGTGACGAAAACGATTTAGATGGAATTTGAGAAAGTCCAATATCCCTTTTTTTAAAAATAAATTTATTTATCTACATTGATATATATTTTATGTTTGTAATGTCTTTCTATGTCGTTTTTATAATTATGTGGAACCTTTCACTAATTTTTTTTTGTTTAG	CACUAAU	CACUAAU	16	380	GUCCAAU	121	1	NA	No	YES	No	NA	No	SPAC20G4.06c_intron2	CACUAAU	14	69	YES	No
II	3964578	3964662	85	-1	SPBC26H8.07c	SPBC26H8.07c.1:exon:6-SPBC26H8.07c.1:exon:5	int_4246	346	346	0	0	0	65	3	1	A;A;A	UCUGCUAACCU;AUCUGCUAACC;UAUGCUCAUCU	12;13;20	271;73;2	Awan_Short	326	225	6.61715	6.65879	10.5484	9.41667	7.07148	6.89627	GTATGTTTACTTGGTTTAAAACGTCGTTTGTATATTTAGTTTATTTTTTCTACTTGTTTATGCTCATCTGCTAACCTCGAAATAG	UGCUAAC	UGCUAAC	12	271	UGCUCAU	20	2	NA	No	YES	No	NA	No	SPBC26H8.07c_intron5	UGCUAAC;UGCUCAU	10;18	66;1	YES	No
II	343850	344021	172	-1	SPBC1271.12	SPBC1271.12.1:exon:3-SPBC1271.12.1:exon:2	int_3417	97	84	13	0	0	38	2	2	A;A	AAGGCUAACAA;AAAGGCUAACA	14;15	87;10	Awan_Short;Awan_Long	566	376	7.24154	7.2097	9.45	5.8	8.31561	7.94395	GTAAGTCAAGTTTATATCCATCATTCGGGTTCCGCGCGGTTAAGTGAATGGAAAGTGAAAGTCAATTATTTTTCGAAACTATGCAAGGCATTTTTTAAGCTGAAATGCCTTCTCCTCCATTTTAATGTTTTCTGTTCTCTTTCGATATGGAAAGGCTAACAACTGTATTTAG	GGCUAAC	GGCUAAC	14	87		NA	NA	NA	No	YES	No	NA	No	SPBC1271.12_intron3	GGCUAAC;AGGCUAA	12;13	34;1	YES	No
I	1838853	1838969	117	1	SPAC1399.05c	SPAC1399.05c.1:exon:1-SPAC1399.05c.1:exon:2	int_395	48	48	0	0	0	32	5	1	A;A;A;A;A	UUUACUAAACU;AUUUACUAAAC;UUACUAAACUG;CAAAUUUACUA;CAAACUAACAA	15;16;14;19;27	32;12;2;1;1	Awan_Short	3	5	6.28648	6.62982	1	6	4.71607	4.38536	GTATGAATATATTTGTTTTATTCTTAAGACTTTTTAAAAACCCATTCCTCTTACTGTAGTCTTGTTGTTGTAATACCATCTTTCAAACTAACAAATTTACTAAACTGCTTATTATAG	AACUAAC	UACUAAA	15	32	AAUUUAC	19	1	NA	No	No	YES	No	No	SPAC1399.05c_intron1	UACUAAA	13	8	YES	No
II	2284413	2284524	112	1	SPBC16H5.08c	SPBC16H5.08c.1:exon:1-SPBC16H5.08c.1:exon:2	int_2839	22	22	0	0	0	15	2	1	A;A	AUCGCUAACAA;AAUCGCUAACA	12;13	21;1	Awan_Short	452	281	7.82316	7.8543	64.7143	47	7.79737	7.51442	GTAAGTTCCTATTAATGAATGCTGTAGAGAAAAAAGTCAAATAAATAGCTTATTTCTAATTTTTTTCGATTGCTTTTAAAATTTTTAAGCTCAATCGCTAACAAATGTTTAG	CGCUAAC	CGCUAAC	12	21		NA	NA	NA	No	YES	No	NA	No	SPBC16H5.08c_intron1	CGCUAAC	10	14	YES	No
II	3550105	3550184	80	-1	SPBC887.06c	SPBC887.06c.1:exon:4-SPBC887.06c.1:exon:3	int_4160	241	241	0	0	0	42	2	1	A;A	AAAACUAAUAC;AAAAACUAAUA	16;17	233;8	Awan_Short	30	15	5.26301	5.17826	10.3333	8	5.66893	5.56038	GTAAGTATTGAATGTTAATTTTGCCTTATTGCCCCAAAGAGCGTTTTAAATTGCACAAAAACTAATACATTATTATGTAG	AACUAAU	AACUAAU	16	233		NA	NA	NA	No	YES	No	No	No	SPBC887.06c_intron3	AACUAAU;AAACUAA	14;15	70;1	YES	No
II	3965549	3965637	89	-1	SPBC26H8.07c	SPBC26H8.07c.1:exon:5-SPBC26H8.07c.1:exon:4	int_4247	19	19	0	0	0	13	1	1	A	AGUACUGACGA	10	19	Awan_Short	645	431	5.35918	5.42038	46.1429	54	9.21343	8.90609	GTAGGTTTTTTTGCTTTCTTACAAGTGTTCGGTTGCTTAAAACTTTTTGAAAAAATTTTTTTTTGTTTATTTAGTACTGACGACTGTAG	UACUGAC	UACUGAC	10	19		NA	NA	NA	No	YES	No	No	No	SPBC26H8.07c_intron4	UACUGAC	8	1	YES	No
III	686086	686203	118	1	SPCC16C4.10	SPCC16C4.10.1:exon:1-SPCC16C4.10.1:exon:2	int_4518	26	25	1	0	0	23	3	2	A;A;A	AUGAUUAACAG;UAUGAUUAACA;UUUGUUUAGCU	14;15;61	20;5;1	Awan_Short;Awan_Long	14	17	7.69986	7.84265	1	3	6.93188	6.84662	GTAAGTTAACAGATATTATATACTTTTGAGTTGTATGGATTCACTGTGGTTTTGTTTAGCTTTGGTTGACGTGAAACACTCTGTCTTAAGGCAATTTATGATTAACAGCTCTATTTAG	GAUUAAC	GAUUAAC	14	20	UGUUUAG	61	1	NA	No	YES	No	YES	No	SPCC16C4.10_intron1	GAUUAAC	12	6	YES	No
II	3652564	3652679	116	1	SPBP8B7.11	SPBP8B7.11.1:exon:2-SPBP8B7.11.1:exon:3	int_3217	100	98	2	0	0	42	2	2	A;A	UUUAUUAACGU;UUUUAUUAACG	9;10	85;15	Awan_Short;Awan_Long	129	138	7.91625	7.92306	43.3333	34.75	7.49096	7.62336	GTATGCTTTAACACAATTCTTATATGTAAAGTTTTTGAGGTTGTGATATTCTGCTTGCGATTTTCGAAACTCTATGATCGTTGTCTTGCCCAATAGTCATTTTATTAACGTGTTAG	UAUUAAC	UAUUAAC	9	85		NA	NA	NA	No	YES	No	NA	No	SPBP8B7.11_intron2	UAUUAAC	7	34	YES	No
I	4055873	4055963	91	-1	SPAC19G12.07c	SPAC19G12.07c.1:exon:2-SPAC19G12.07c.1:exon:1	int_2084	935	935	0	0	0	106	4	1	A;A;A;A	UUUACUAACCC;UUUUACUAACC;CGUUUACAAUU;UGUUUUUACUA	13;14;81;17	769;157;6;3	Awan_Short	3	0	4.42228	5.04215	2	1	3.31659	3.13892	GTACGTTTACAATTTTTTTCCTTCCTTCCCGCCTTTTCCCTTTGTTTTTTTGTCTTCCCGTGTTTATTGTTTTTACTAACCCTTTTCCTAG	UACUAAC	UACUAAC	13	769	UUUACAA	81	6	NA	No	YES	No	NA	No	SPAC19G12.07c_intron1	UACUAAC;UUACUAA	11;12	228;3	YES	No
II	3403941	3404123	183	1	SPBC13A2.03	SPBC13A2.03.1:exon:1-SPBC13A2.03.1:exon:2	int_3150	31	27	4	0	0	25	3	2	A;A;A	UUUUUUAACUU;GUUUUUUAACU;AAUGAAAAGCC	11;12;79	26;4;1	Awan_Short;Awan_Long	11	3	7.3048	7.1795	12	1.33333	6.43962	6.38379	GTATGTGAGATGATACTGTTCACTAGCTTTTCTAAAGTGTTTAACTGTGATGTTGGTGTTCGCGATCAGTAGAGTATTTTAAAAAAAAATAATAGAAAATGAAAAGCCAAAATCGTTTTTCTCTTTTTAGCGTCAAATTTATTACCTTTTTGTTTTTTAAGGCAGTTTTTTAACTTTTTTTAG	UUUUAAC	UUUUAAC	11	26	UGAAAAG	79	1	NA	No	YES	No	YES	No	SPBC13A2.03_intron1	UUUUAAC	9	7	YES	No
I	1283643	1283758	116	1	SPAPB17E12.11	SPAPB17E12.11.1:exon:3-SPAPB17E12.11.1:exon:4	int_295	62	62	0	0	0	27	3	1	A;A;A	AAAACUAACUU;AAAAACUAACU;UAAAAAAACUA	10;11;14	59;2;1	Awan_Short	83	64	3.16136	3.13125	28	65	6.03084	5.78831	GTAAGTCCAAACACTCATCTTTCCTCCGAAATTGTTTGTTTGCGAATACTTTTTTTTAGTAATTCGCCGTACTATTTTTAGTTTTTTTGAAGAAATAAAAAAACTAACTTACTTAG	AACUAAC	AACUAAC	10	59	AAAAAAC	14	1	NA	No	YES	No	YES	No	SPAPB17E12.11_intron3	AACUAAC	8	10	YES	No
I	4833161	4833256	96	1	SPAC4F10.02	SPAC4F10.02.1:exon:1-SPAC4F10.02.1:exon:2	int_994	79	79	0	0	0	38	1	1	A	UUGUUUAACAU	13	79	Awan_Short	3	2	4.11245	4.12673	1.33333	3	4.38568	4.00348	GTAAGTCAAGTTCTCAATGAGTTGCCTCTATATGCTTCGCCTTAAACTTCAGTAGAGTTTGATTGTATTATTATTATTGTTTAACATTTATGATAG	GUUUAAC	GUUUAAC	13	79		NA	NA	NA	No	YES	No	No	No	SPAC4F10.02_intron1	GUUUAAC	11	4	YES	No
I	5300949	5301115	167	1	SPAC11E3.10	SPAC11E3.10.1:exon:2-SPAC11E3.10.1:exon:3	int_1095	26	26	0	0	0	20	2	1	A;A	GUUACUAAACA;UGUUACUAAAC	16;17	22;4	Awan_Short	6	4	7.16171	7.32799	0.225806	0.113636	3.37549	3.08234	GTAAGTAAACTCCGCACATGTAACTAGTTTCGTTTTTAAATCATTCGTATTCGTAACGCTTTGCTCCTTATTATTACTTTATCGAAATTCAGCCTTTTAAAGGATTTATTTTTTTTGAAAACAATTATATTGATAAATGATTATGTTACTAAACACATTGTATTTAG	UAUUGAU	UACUAAA	16	22		NA	NA	NA	No	No	YES	No	No	SPAC11E3.10_intron2	UACUAAA	14	13	YES	No
I	2116018	2116192	175	-1	SPAC20H4.03c	SPAC20H4.03c.1:exon:3-SPAC20H4.03c.1:exon:2	int_1616	94	83	11	0	0	40	4	2	A;A;A;A	AAUACUAACCA;AAAUACUAACC;AUGGAGAAUCG;GAGUACCAACA	14;15;33;48	82;10;1;1	Awan_Short;Awan_Long	14	11	8.38473	8.37091	15	12	5.41318	5.45512	GTAGGTTTATTACATGCAATATGGTAGTATTCTCGCACGGATTGTTGACAATATATTACATGAATTTTGCAAATTTCACTTAATAGAAATAACATCTTTCTTAAAATACGAATTCCACAAGAGTACCAACATTTGATGGAGAATCGGTATTCAAAATACTAACCAATGATGCTAG	UACUAAC	UACUAAC	14	82	GGAGAAU	33	1	NA	No	YES	No	NA	No	SPAC20H4.03c_intron2	UACUAAC;GUACCAA	12;46	8;1	YES	No
II	3583601	3583706	106	-1	SPBC418.01c	SPBC418.01c.1:exon:2-SPBC418.01c.1:exon:1	int_4169	279	279	0	0	0	58	4	1	A;A;A;A	AAUACUAAUCU;AAAUACUAAUC;AUCAAAUACUA;UCAUCAAAUAC	14;15;18;20	259;18;1;1	Awan_Short	97	75	5.75609	6.17778	98	38	5.98295	6.0635	GTATGTCATTATTGTTTTTAAAAATGTTGTTACCATCTACATTATAAAGGCTAAGTCAAATCGGTTTTTTTTTTCGTTTTCATCAAATACTAATCTATACTTTCAG	UACUAAU	UACUAAU	14	259	CAAAUAC	18	1	NA	No	YES	No	NA	No	SPBC418.01c_intron1	UACUAAU;AUACUAA	12;13	102;2	YES	No
III	1446512	1446614	103	-1	SPCC61.04c	SPCC61.04c.1:exon:3-SPCC61.04c.1:exon:2	int_5147	123	123	0	0	0	33	4	1	A;A;A;A	AAUACUAACUG;UAAUACUAACU;UUUUAAUACUA;AUUUUUAAUAC	15;16;19;21	100;21;1;1	Awan_Short	13	16	5.98361	6.22873	0.933333	1.41667	4.11306	4.25933	GTACGTCAGTCGATCGATCTCTGATATATGGTAAAATGATTTTAGATAATCGTTACACAATTTCATGCTTTAGGAATTTTTAATACTAACTGTATCTTTTTAG	UACUAAC	UACUAAC	15	100	UUAAUAC	19	1	NA	No	YES	No	YES	No	SPCC61.04c_intron2	UACUAAC;AUACUAA	13;14	93;3	YES	No
I	3409268	3409426	159	-1	SPAP32A8.03c	SPAP32A8.03c.1:exon:2-SPAP32A8.03c.1:exon:1	int_1904	89	78	11	0	0	39	4	2	A;A;A;A	GUUGUUAACAU;GGUUGUUAACA;AACCAACAAUC;UUUCAUUAUUU	12;13;65;106	71;16;1;1	Awan_Short;Awan_Long	412	262	5.21235	5.36564	137.667	131.5	7.3577	6.90776	GTATGTAGTATTTAGAGGTCTTTCTCTGTTTAGATGTAATTTATTTTTTCATTATTTATGTATAAGAGACACTTTTATGCACAATATAACCAACAATCATGCTATTGCATACCTTAACAGACATTTGAAGTATTGATCTGGTTGTTAACATTTGTGTAG	UGUUAAC	UGUUAAC	12	71	UCAUUAU	106	1	NA	No	YES	No	NA	No	SPAP32A8.03c_intron1	UGUUAAC	10	25	YES	No
III	469498	469625	128	-1	SPCC4G3.02	SPCC4G3.02.1:exon:2-SPCC4G3.02.1:exon:1	int_4945	11	6	5	0	0	10	2	2	A;A	GCUGCUAACGA;AGCUGCUAACG	10;11	9;2	Awan_Short;Awan_Long	9	19	5.04791	5.07669	2.5	5	3.5764	4.50976	GTAAGTTAACGGTCTCATGTGTGTAGATATTGGTGTTTGCAAACTTTTGTTTGTCATTCTTATTTATTCTATAACGGCAGACAGTTTGTGATTTTTCTTTGGTTGAGGTCAGCTGCTAACGATTTTAG	UGCUAAC	UGCUAAC	10	9		NA	NA	NA	No	YES	No	No	No	SPCC4G3.02_intron1	UGCUAAC	8	1	YES	No
II	3324272	3324386	115	1	SPBC17D11.08	SPBC17D11.08.1:exon:1-SPBC17D11.08.1:exon:2	int_3122	100	100	0	0	0	35	2	1	A;A	GUUACUAACCA;AGUUACUAACC	17;18	85;15	Awan_Short	92	48	4.57439	4.31366	23.25	16.3333	7.05549	6.84924	GTATGCTAATTGCAAAACCAGGGGAAATATTATATAATTTTATCTGTGCTTCTTTTGGCATAGACTCCAAAGATGTACTCTGTTCTACGAAGTTACTAACCAAAAAATTGTTTAG	UACUAAC	UACUAAC	17	85		NA	NA	NA	No	YES	No	No	No	SPBC17D11.08_intron1	UUACUAA;UACUAAC	16;15	1;69	YES	No
III	2064591	2064757	167	1	SPCC1739.15	SPCC1739.15.1:exon:1-SPCC1739.15.1:exon:2	int_4774	1	1	0	0	0	1	1	1	A	CAUAUUAAUUU	10	1	Awan_Short	0	0	-2.00816	-16.6096	1	1	-0.527946	-2.04345	GTAAGAATTGTAAACAATAAGAAAGGAATTACTCAATGGAAAGTTGAAACTTGCCATCTTGTCAAATTGCATGCTTTGGTCATTGTTTACAGTCGGCCATGCAATGCACACAATTTGATACATGCTCTTTCTTTACTAAAGTATTTCAATCATATTAATTTAAACAG	UAUUAAU	UAUUAAU	10	1		NA	NA	NA	No	YES	No	No	No	NA	NA	0	0	No	No
II	2405622	2405752	131	-1	SPBC1921.01c	SPBC1921.01c.1:exon:2-SPBC1921.01c.1:exon:1	int_3866	715	556	159	0	0	58	5	2	A;A;A;A;A	UUUACUAAUUA;CUUUACUAAUU;AUUCAAAACCU;AACCUUUACUA;UAAACGAAUAC	12;13;22;16;33	659;52;2;1;1	Awan_Short;Awan_Long	255	238	9.01625	9.11769	42.6667	39.8333	7.57265	7.47265	GTAAGTTTATTTTTGTAATTAAATTCTTGCGTTTCTTTGGAGAATATGAAGAAACGTTAATGCTATATTTTCACGGTCGTTTTTTGTTGGCTAAACGAATACATTCAAAACCTTTACTAATTACGTTTTAG	UACUAAU	UACUAAU	12	659	UCAAAAC	22	2	NA	No	YES	No	YES	No	SPBC1921.01c_intron1	UACUAAU;UUACUAA	10;11	48;2	YES	No
II	3022549	3022636	88	1	SPBC15D4.06	SPBC15D4.06.1:exon:1-SPBC15D4.06.1:exon:2	int_3021	113	113	0	0	0	35	1	1	A	UUUACUGACAG	11	113	Awan_Short	51	37	3.87025	3.60019	26	9.5	3.81235	3.33212	GTATGTTCCCATTTCATTGATTTCTCAAACTGCTTCTTGCATATTATGAAACTCGGCAATATCATTATAGTTTACTGACAGATTAAAG	UACUGAC	UACUGAC	11	113		NA	NA	NA	No	YES	No	NA	No	SPBC15D4.06_intron1	UACUGAC	9	40	YES	No
I	3499283	3499428	146	1	SPAC16E8.01	SPAC16E8.01.1:exon:1-SPAC16E8.01.1:exon:2	int_724	101	89	12	0	0	46	4	2	A;A;A;A	CUUGCUAACCA;GCUUGCUAACC;GAAGGAGAAAU;CGAUAGGAUAC	16;17;77;90	85;14;1;1	Awan_Short;Awan_Long	28	5	8.28238	8.24235	9.66667	3	6.53942	5.92216	GTATGTGTAGAATAAATGACAGAGACCACGGTCTTCTACATGTTTGATGCGATAGGATACGTGAAGGAGAAATAGATCGAGTCTTGTCTTTGCTCATTTAGTAATAATGTTATTGTAAAGCCGCTTGCTAACCATTTTGTGTATAG	UGCUAAC	UGCUAAC	16	85	AUAGGAU	90	1	NA	No	YES	No	NA	No	SPAC16E8.01_intron1	UGCUAAC	14	27	YES	No
III	225173	225322	150	-1	SPCC548.05c	SPCC548.05c.1:exon:2-SPCC548.05c.1:exon:1	int_4902	36	30	6	0	0	17	5	2	A;A;A;A;A	GAAACUAAUAA;UGAAACUAAUA;AGAUUAUAUCU;AAGAGCAAGAU;AAAGAGCAAGA	8;9;58;65;66	32;1;1;1;1	Awan_Short;Awan_Long	1	3	4.00465	3.60841	1	2	3.82339	3.89443	GTAAGTGAAAATTTGATGCTTAACACTGGAATAACTTTTCATTATCATTGAATTCCCTCATTGTGAGTGAAATATTGAAAGAGCAAGATTATATCTTTAAAAGTTTCTAGATTTACTTTTTTTCTATAAAGGATTGAAACTAATAAATAG	AACUAAU	AACUAAU	8	32	AUUAUAU	58	1	NA	No	YES	No	NA	No	SPCC548.05c_intron1	AACUAAU	6	6	YES	No
I	2439658	2439854	197	1	SPAC6B12.15	SPAC6B12.15.1:exon:1-SPAC6B12.15.1:exon:2	int_527	215	43	172	0	0	74	5	2	A;A;A;A;A	UUUUCUAACAU;GUUUUCUAACA;AAACCAGACCU;AAAAACCAGAC;CAAUCUAAUAA	13;14;97;99;151	172;40;1;1;1	Awan_Short;Awan_Long	1909	1215	11.1648	11.2001	173.636	101.333	10.6889	10.5158	GTATGTAAATCAAAAAAATTTCAGTGCGGTAATTGTTAGCAATCTAATAATGAAGTTGTGCAATATGTAAATTATACAGTGATAGCGGTAGAAAAACCAGACCTGAAAATTTTACCTAATTAGCACATCAGATAAAAATATTGAGCGCTTTCGATTGCTTTCTTGCTTTAGTACTAGTTTTCTAACATCTATTTCAG	UUCUAAC	UUCUAAC	13	172	AUCUAAU	151	1	NA	No	YES	No	No	No	SPAC6B12.15_intron1	UUCUAAC	11	3	YES	No
I	3686601	3686709	109	-1	SPAC15A10.05c	SPAC15A10.05c.1:exon:2-SPAC15A10.05c.1:exon:1	int_1984	96	96	0	0	0	23	3	1	A;A;A	UUAGCUAACAU;AUUAGCUAACA;AUUAUAGACGC	10;11;78	87;8;1	Awan_Short	0	0	5.50212	5.69353	0.5	0.5	2.8845	2.8495	GTAAGCAAGTATTACATCGGCTCTATTATAGACGCACTTCTAAAATTTACATCGTCAATTCCTTGACATCCTTGCCCATGTATTTACGGTAATTAGCTAACATCTGTAG	AGCUAAC	AGCUAAC	10	87	UAUAGAC	78	1	NA	No	YES	No	NA	No	SPAC15A10.05c_intron1	AGCUAAC	8	3	YES	No
I	2747432	2747508	77	-1	SPAC6F6.08c	SPAC6F6.08c.1:exon:2-SPAC6F6.08c.1:exon:1	int_1765	10	10	0	0	0	9	2	1	A;A	UUUACUAACUC;AUUUACUAACU	12;13	7;3	Awan_Short	15	11	-0.891275	1.98548	8	4	3.68959	3.15829	GTAAGTAACTGTTTATTTATTGTTTTAATGCTCCTATTTATTAATCTATTATTGTCAATTTACTAACTCAATTACAG	UACUAAC	UACUAAC	12	7		NA	NA	NA	No	YES	No	No	No	SPAC6F6.08c_intron1	UACUAAC;UUACUAA	10;11	2;2	YES	No
I	786063	786160	98	-1	SPAC4G8.12c	SPAC4G8.12c.1:exon:4-SPAC4G8.12c.1:exon:3	int_1290	141	141	0	0	0	42	2	1	A;A	UUGACUAAUUU;CUUGACUAAUU	10;11	117;24	Awan_Short	7	6	4.98959	4.72501	0.727273	3.5	4.17385	4.68806	GTATGTACATTGGCGAATATTAAGCTCTGATAAATTTGGAATTTATTTCAGAATTTACTACAAACCTTATTTCCTCCTTCCTTGACTAATTTTGGCAG	GACUAAU	GACUAAU	10	117		NA	NA	NA	No	YES	No	No	No	SPAC4G8.12c_intron3	GACUAAU;UGACUAA	8;9	71;2	YES	No
III	591068	591182	115	-1	SPCC1672.12c	SPCC1672.12c.1:exon:5-SPCC1672.12c.1:exon:4	int_4983	5	5	0	0	0	4	1	1	A	CUUACUAAUGA	11	5	Awan_Short	109	75	5.00573	5.01163	22	25.3333	6.44545	6.16927	GTAAGTGCCTATTTATCTGTATGGATTATATATGGACGGCGTGAATGATAACGATCGATTCTTCGCCCTTTTATCCTACATACTGTCTTTTTTTTTACTTACTAATGATGAATAG	UACUAAU	UACUAAU	11	5		NA	NA	NA	No	YES	No	NA	No	NA	NA	0	0	No	No
II	3654284	3654440	157	-1	SPBP8B7.12c	SPBP8B7.12c.1:exon:1-SPBP8B7.12c.1:three_prime_UTR:1	int_4188	145	117	28	0	0	57	7	2	A;A;A;A;A;A;A	CUUACUAACCU;GAGGGCCAAUC;UCUUACUAACC;UAAGCCCAGUG;AACCUUUAGNN;UGGGACGAUAU;UCAACGGAGCC	8;46;9;130;2;67;101	116;12;11;3;1;1;1	Awan_Short;Awan_Long	3	5	10.9024	11.0574	0.8	1.5	6.50766	6.47146	GTATGTTTTTATGAATGTTATAAGCCCAGTGATGCTTTTTTGAATTTCTTCAACGGAGCCGTTTGTCTTATTGACATGCGATGTGGGACGATATTTGACATACTGAGGGCCAATCATTCATTTTTCTGACTTCATAATTTTTCTTACTAACCTTTAG	UACUAAC	UACUAAC	8	116	GGGCCAA	46	12	NA	No	YES	No	NA	No	SPBP8B7.12c_intron1	UACUAAC	6	4	YES	No
III	1778271	1778366	96	1	SPCC1442.06	SPCC1442.06.1:exon:1-SPCC1442.06.1:exon:2	int_4721	76	76	0	0	0	39	2	1	A;A	AAUACUAACAU;AAAUACUAACA	12;13	70;6	Awan_Short	60	49	4.46295	4.29179	4.69231	4.54545	7.46882	7.42483	GTACTACATAATCATGGGTTCTAAAATAATATAACCTGTGTATTCCCTTTGGAAGCGTTTTTTGTTTTTGTGTTATAAATACTAACATAATTATAG	UACUAAC	UACUAAC	12	70		NA	NA	NA	No	YES	No	No	No	SPCC1442.06_intron1	UACUAAC	10	21	YES	No
III	150164	150278	115	-1	SPCC320.09	SPCC320.09.1:exon:3-SPCC320.09.1:exon:2	int_4884	28	28	0	0	0	19	3	1	A;A;A	AGAACUAAUGU;GAGAACUAAUG;ACACGAGAACU	10;11;15	25;2;1	Awan_Short	8	9	4.11496	3.90927	9	5	5.04148	4.91961	GTAAGACTTTAATTGAAGAAGCGTTTGTATGGAGTACAGCCTGAAAAACGCTTCAACTTTTGTTGTTTTTATATTCATTTATAATTACTATCAACACGAGAACTAATGTTTTCAG	AACUAAU	AACUAAU	10	25	ACGAGAA	15	1	NA	No	YES	No	NA	No	SPCC320.09_intron2	AACUAAU	8	6	YES	No
III	2192256	2192448	193	1	SPCC830.06	SPCC830.06.1:exon:1-SPCC830.06.1:exon:2	int_4819	100	99	1	0	0	20	5	2	A;A;A;A;A	UCGGCUAACGU;CUCGGCUAACG;CCAAUUCAUCA;GCACCUCAAAG;AAUACUUACAU	17;18;80;32;123	94;2;2;1;1	Awan_Short;Awan_Long	29	25	6.08224	6.22459	6	2.88889	4.39624	4.36613	GTAAGTTTGATGCTTAGTACGTGTGGCCAAAAGTGTTCTTATCATTATATTTTTTCATGTTAGAATACTTACATCTCTTGTCGTCTATTTCTTTTTAAGATTATAGCCAATTCATCAAAGTTGCCGGTTTCACATGCACAATGCAAAAGTATTAGCACCTCAAAGCGACTCGGCTAACGTTCATTGTATCTAG	GGCUAAC	GGCUAAC	17	94	AAUUCAU	80	2	NA	No	YES	No	No	No	SPCC830.06_intron1	GGCUAAC	15	4	YES	No
III	1176998	1177128	131	1	SPCC4B3.02c	SPCC4B3.02c.1:exon:3-SPCC4B3.02c.1:exon:4	int_4619	65	62	3	0	0	23	2	2	A;A	AACACUAAUAC;UAACACUAAUA	12;13	64;1	Awan_Short;Awan_Long	1	1	5.69961	6.11769	1	0.25	-0.116353	0.175458	GTATGTTTAGTAAACAAACATCCTAAGTATATGAAGTGTCCTTAGACGTGAATTATTAACTTTCATTTCATTTCATTGACTCACATATATCAACTCTCTATTATTCCTGTATAACACTAATACGTATATAG	CACUAAU	CACUAAU	12	64		NA	NA	NA	No	YES	No	NA	No	SPCC4B3.02c_intron3	CACUAAU	10	21	YES	No
I	1215639	1215722	84	-1	SPAC10F6.05c	SPAC10F6.05c.1:exon:3-SPAC10F6.05c.1:exon:2	int_1398	22	22	0	0	0	14	2	1	A;A	UUUGCUAACUU;CUUUGCUAACU	13;14	18;4	Awan_Short	22	22	5.75135	6.22918	7.66667	23	3.81019	3.95568	GTATGTTTCTTTTAAATTTCCTTCTGTAATCAATATGTGCATGAACTTTTGGCTGTTGCCATCCTTTGCTAACTTTGCGTACAG	UGCUAAC	UGCUAAC	13	18		NA	NA	NA	No	YES	No	NA	No	SPAC10F6.05c_intron2	UGCUAAC	11	2	YES	No
I	936372	936452	81	-1	SPAC1687.18c	SPAC1687.18c.1:exon:4-SPAC1687.18c.1:exon:3	int_1324	110	110	0	0	0	58	3	1	A;A;A	UCUGCAAAGUA;AGUAUUAACUU;AAGUAUUAACU	19;12;13	57;51;2	Awan_Short	79	67	3.6206	3.02789	3.80952	6.8	5.59069	5.61622	GTATTATTAACGAACATGAAGGAATCCTATCATTGTTTACATTTTTTACTGTTTATCTGCAAAGTATTAACTTTATTTTAG	UAUUAAC	UGCAAAG	19	57	UAUUAAC	12	51	NA	YES	No	YES	NA	No	SPAC1687.18c_intron3	UAUUAAC	10	2	YES	No
I	4872573	4872685	113	-1	SPAC4F10.19c	SPAC4F10.19c.1:exon:2-SPAC4F10.19c.1:exon:1	int_2245	73	73	0	0	0	25	2	1	A;A	AAUACUAAUAU;AAAUACUAAUA	15;16	66;7	Awan_Short	17	10	5.53259	6.22216	3	1.22222	3.67078	2.9626	GTATGTGCTTGTAAGCTCAGAACAATGCATTTTGTTTCAATACACATTAACCCATGAACCAATGCTTTATTCTTTTTTTCTGTTTCCTAAAAATACTAATATAGAATTAATAG	UACUAAU	UACUAAU	15	66		NA	NA	NA	No	YES	No	No	No	SPAC4F10.19c_intron1	UACUAAU	13	7	YES	No
II	3200402	3200492	91	1	SPBC776.13	SPBC776.13.1:exon:2-SPBC776.13.1:exon:3	int_3070	33	33	0	0	0	24	3	1	A;A;A	CAAACUAACAA;CCAAACUAACA;CAAUUUUACCA	15;16;24	29;3;1	Awan_Short	14	13	1.67505	2.15951	5	2.8	3.39363	3.53344	GTAAGTAGTTGTTATTTTGTGTTATTCAAATAGAAGGAAGCCATTTGGTTTACTATATATCAATTTTACCAAACTAACAATAATGGTTTAG	AACUAAC	AACUAAC	15	29	AUUUUAC	24	1	NA	No	YES	No	No	No	SPBC776.13_intron2	AACUAAC	13	5	YES	No
II	3332186	3332291	106	-1	SPBC17D1.03c	SPBC17D1.03c.1:exon:3-SPBC17D1.03c.1:exon:2	int_4096	19	19	0	0	0	13	2	1	A;A	UUUACUAACAA;UUUUACUAACA	13;14	18;1	Awan_Short	5	3	1.81749	1.52435	2	4	2.54206	2.18617	GTATGTATCAAATTATTGGAATTTTTCTAATTTTCTACCATACGTTTCATTTATTGTTAAACTATCATTTAGAATATTTAGTTACTTTTACTAACAACTTATACAG	UACUAAC	UACUAAC	13	18		NA	NA	NA	No	YES	No	NA	No	SPBC17D1.03c_intron2	UACUAAC	11	2	YES	No
II	410029	410146	118	1	SPBC106.16	SPBC106.16.1:exon:2-SPBC106.16.1:exon:3	int_2411	291	290	1	0	0	76	2	2	A;A	UUUGUUAACAA;AUUUGUUAACA	13;14	265;26	Awan_Short;Awan_Long	289	234	6.26103	5.96456	72.5	117.5	6.75933	6.85681	GTATGTCCGTTATATGTTTCTGTAAAATCAGCATTGCTAGTTTACCTTTATGGATGCTTTTTTTTTTTTTTTTTTGCTTTCTTCCTTCCTAAGACCAATTTGTTAACAAAGAATATAG	UGUUAAC	UGUUAAC	13	265		NA	NA	NA	No	YES	No	NA	No	SPBC106.16_intron2	UUGUUAA;UGUUAAC	12;11	3;129	YES	No
I	2404251	2404366	116	-1	SPAC1B9.02c	SPAC1B9.02c.1:exon:2-SPAC1B9.02c.1:exon:1	int_1694	165	165	0	0	0	48	2	1	A;A	UUGGCUAACCU;CUUGGCUAACC	11;12	157;8	Awan_Short	55	50	6.16136	6.0761	28	12.75	6.36876	6.13363	GTATGTTATAATTGATTTTTTGCTTGAAAGACAATCTTCCCCATAGCTTTCTTTATTGTGTTTTTCAAAAATCACTGTCTCCATAAATTGTTGTTCACTTGGCTAACCTATCATAG	GGCUAAC	GGCUAAC	11	157		NA	NA	NA	No	YES	No	NA	No	SPAC1B9.02c_intron1	GGCUAAC	9	25	YES	No
II	3713238	3713391	154	-1	SPBC19F5.05c	SPBC19F5.05c.1:exon:3-SPBC19F5.05c.1:exon:2	int_4197	261	124	137	0	0	39	4	2	A;A;A;A	UGUACUAAUAA;AUGUACUAAUA;AACAUGGACGU;UAUCUGAACAU	13;14;103;109	249;10;1;1	Awan_Short;Awan_Long	33	35	9.17007	9.37851	17	7.2	3.76543	3.97924	GTAAGTCTAATAGCATCAATTTTTACCGGAATCATAGCTATCTGAACATGGACGTTTGGTATAAAAAGCATTTTCCGAATGGTCAATTTTATCATGGGCTAGTCTTTTTTTGATGAACTAAAAGAATGAAATTATGTACTAATAAATATAATAG	UACUAAU	UACUAAU	13	249	CAUGGAC	103	1	NA	No	YES	No	NA	No	SPBC19F5.05c_intron2	UACUAAU	11	38	YES	No
II	4005283	4005387	105	1	SPBC3B9.10	SPBC3B9.10.1:exon:3-SPBC3B9.10.1:exon:4	int_3284	32	32	0	0	0	19	4	1	A;A;A;A	CAUACUAACAA;UCAUACUAACA;AAUUCAUACUA;UUUAUUUACCA	17;18;21;32	29;1;1;1	Awan_Short	184	167	3.90917	3.81103	37	168	7.39805	7.76163	GTAAGTTAGCTATATCGAACATTCTTCTTTTGAAGCTTTACAGAAATTACTATGAGACAATCTACTTTTATTTACCAAATTCATACTAACAATTTTCTCGTTTAG	UACUAAC	UACUAAC	17	29	UUCAUAC	21	1	NA	No	YES	No	YES	No	SPBC3B9.10_intron3	UACUAAC	15	11	YES	No
II	1329000	1329081	82	1	SPBC27B12.05	SPBC27B12.05.1:exon:2-SPBC27B12.05.1:exon:3	int_2615	31	31	0	0	0	11	2	1	A;A	AAAGCUAAUAC;AAAAGCUAAUA	13;14	29;2	Awan_Short	14	9	1.01794	0.309758	7.5	10	3.96485	3.48408	GTATGTTATGCTATGTTATATTACAAGAGTTCTCCCTTTATCATTTCTTTTAAGTAATTATAAAAGCTAATACGTAACATAG	AGCUAAU	AGCUAAU	13	29		NA	NA	NA	No	YES	No	NA	No	SPBC27B12.05_intron2	AGCUAAU	11	8	YES	No
II	365631	365765	135	1	SPBC1271.04c	SPBC1271.04c.1:exon:1-SPBC1271.04c.1:exon:2	int_2402	51	37	14	0	0	18	2	2	A;A	AAUACUAAUUG;CAAUACUAAUU	10;11	48;3	Awan_Short;Awan_Long	33	25	4.7581	4.96552	34	26	6.97085	6.83461	GTATGTTTAAAATGTAGTTTTTTTTTCTTGATATTCTTTTAGCTTTCATACGCTATTCTGTTAAAATTGTGAAAAAATATGACTTACTTTATGCCTGCTAGGCACATATCGATTGAGCAATACTAATTGTTACAG	UACUAAU	UACUAAU	10	48		NA	NA	NA	No	YES	No	No	No	SPBC1271.04c_intron1	UACUAAU	8	5	YES	No
I	635236	635348	113	1	SPAC1F3.09	SPAC1F3.09.1:exon:2-SPAC1F3.09.1:exon:3	int_104	49	49	0	0	0	22	2	1	A;A	GUUGCUAACCU;UGUUGCUAACC	13;14	45;4	Awan_Short	13	14	4.07887	4.7051	2.8	1.66667	4.36682	4.41288	GTATGATTTTGAATGGCCGGTTTTATCGAACGAGAAATTCTTTTCTTTAATGCTTTAATCACGATTGATAAATCTTTCTTCTTATTCATTCTTGTTGCTAACCTGAGCTGTAG	UGCUAAC	UGCUAAC	13	45		NA	NA	NA	No	YES	No	No	No	SPAC1F3.09_intron2	UGCUAAC	11	20	YES	No
III	2204869	2204965	97	1	SPCC1919.01	SPCC1919.01.1:exon:2-SPCC1919.01.1:exon:3	int_4829	20	20	0	0	0	16	2	1	A;A	UUCACUAACAA;UUUCACUAACA	11;12	17;3	Awan_Short	38	34	3.86304	4.65235	39	17.5	5.03635	4.73959	GTATGTCAATTTTATAAATTTTGCGCGTGTGAACATTCGAATCTTGCATGCCAAATAAACTAGATCATTTATTTTCAATTTCACTAACAACAATTAG	CACUAAC	CACUAAC	11	17		NA	NA	NA	No	YES	No	No	No	SPCC1919.01_intron2	CACUAAC	9	3	YES	No
II	413654	413893	240	1	SPBC106.18	SPBC106.18.1:exon:1-SPBC106.18.1:exon:2	int_2412	20	4	16	0	0	17	2	2	A;A	UUUGCUAACUU;UACUUAAAUUA	16;103	16;4	Awan_Long;Awan_Short	14188	12846	10.9264	10.772	141.89	225.386	12.0743	12.1622	GTATGTTTTATGAATTTTCACGGAAAAAACGTCTCAGGTTCATTACAGTGTCCAAACATGGTGTCGTCAAAAGTTCAGTGTATGGCATGATTTGCTAAGTAAATTACTTTTTACATTTGTAACAGAATATTACTTAAATTATTGCTGGATTTCCCGATACACTTTTTTATGGAGCTTAAGAACTTCGGTCTTTCCAAATATTTTTTAGATAAGAATATTTGCTAACTTATATCTTTATAG	UGCUAAC	UGCUAAC	16	16	CUUAAAU	103	4	NA	No	YES	No	NA	No	SPBC106.18_intron1	CUUAAAU	101	2	YES	No
III	697753	697874	122	-1	SPCC16C4.16c	SPCC16C4.16c.1:exon:3-SPCC16C4.16c.1:exon:2	int_5024	160	156	4	0	0	64	2	2	A;A	AUUACUAACAC;AAUUACUAACA	14;15	119;41	Awan_Short;Awan_Long	15	14	5.96831	6.08529	0.727273	0.681818	4.66686	4.73441	GTATAACTTGTGAAAACCAAATTAGTCCGGGTGCACTCATACTTTTCAAAAATCATTTCCTCTACTTTTGAGAATCTCCTTTTACTCAATTTTATATTCAAATTACTAACACTTTCGCACAG	UACUAAC	UACUAAC	14	119		NA	NA	NA	No	YES	No	NA	No	SPCC16C4.16c_intron2	UACUAAC;UUACUAA	12;13	70;3	YES	No
II	525526	525613	88	-1	SPBC1685.12c	SPBC1685.12c.1:five_prime_UTR:2-SPBC1685.12c.1:exon:1	int_3473	17	17	0	0	0	7	2	1	A;A	ACAACUGAUUU;AAAGACAACUG	13;17	11;6	Awan_Short	0	0	0.916061	0.207879	1	1	-16.6096	-16.6096	GTAAGCAACAGCAACAGCAGCAAAGAGTAAAAATCAACAAAGGAAATTTACTTTGGAGAGAGAAAAAGACAACTGATTTTAAGTATAG	AACUGAU	AACUGAU	13	11	AGACAAC	17	6	NA	No	YES	No	YES	No	NA	NA	0	0	No	No
I	2311572	2311693	122	-1	SPAC13G7.08c	SPAC13G7.08c.1:exon:2-SPAC13G7.08c.1:exon:1	int_1661	128	122	6	0	0	32	3	2	A;A;A	AAAACUAAUAC;UAAAACUAAUA;AAGCUAAAGUA	12;13;45	118;7;3	Awan_Short;Awan_Long	8	13	4.85414	4.82402	3	4.66667	4.43831	3.94312	GTAGGTTCTCTCTGCACTGCATTAGTTGTACGCTTACTTCGTTTATAACAGCAGTTTTACAGCTAATTTCAAGCTAAAGTAGCTAAACACATTTTAAATGAGTAAAACTAATACAAGTGTAG	AACUAAU	AACUAAU	12	118	GCUAAAG	45	3	NA	No	YES	No	NA	No	SPAC13G7.08c_intron1	AACUAAU	10	46	YES	No
II	1361511	1361663	153	-1	SPBC8D2.02c	SPBC8D2.02c.1:five_prime_UTR:2-SPBC8D2.02c.1:exon:3	int_3647	20	18	2	0	0	17	4	2	A;A;A;A	UUAGCUAACCU;UUUAGCUAACC;UUGCCAAAUAU;UCUCUUUAGCU	12;13;106;17	14;3;2;1	Awan_Short;Awan_Long	0	0	8.26276	8.44608	1	1	1.5525	1.84431	GTAAGTTTATAAATTTTACCTTAGTTTGGACATCTGCGTGTTGCCAAATATGACTTTTGTGCCCATAATCCAATGTGTTTCTGAAGCCGTTTGCTGTGATGACCGATAGTTTCCATAAGTTATTTGCTTTCTCTTTAGCTAACCTGATTTTAG	ACCUGAU	AGCUAAC	12	14	GCCAAAU	106	2	NA	No	No	No	NA	No	SPBC8D2.02c_intron3	AGCUAAC	10	3	YES	No
II	4261073	4261162	90	-1	SPBC16A3.19	SPBC16A3.19.1:exon:2-SPBC16A3.19.1:exon:1	int_4313	28	28	0	0	0	15	2	1	A;A	UUCACUAAUUA;AUUCACUAAUU	12;13	23;5	Awan_Short	9	5	3.83783	4.26291	10	6	6.13594	5.83961	GTAAGTGTTCGAAAGGTTAATTGCTCGGTCTCTTATTTTAAAAGCTGCATGTTATCAAATTATTGCATTCATTCACTAATTAAAAAATAG	CACUAAU	CACUAAU	12	23		NA	NA	NA	No	YES	No	No	No	SPBC16A3.19_intron1	CACUAAU	10	9	YES	No
I	4074292	4074387	96	1	SPAC19G12.14	SPAC19G12.14.1:exon:2-SPAC19G12.14.1:exon:3	int_848	3	3	0	0	0	3	1	1	A	UAUACUUACCG	12	3	Awan_Short	39	34	1.79053	-16.6096	5.71429	35	4.49887	4.25226	GTATGATAAATTGCGTAAATTTTTTTATGGGAATGCAAAGTCTTTTACTTGTTTTCCTTGTTTGCTTTTATTTTCATTATACTTACCGGTGTTTAG	UACUUAC	UACUUAC	12	3		NA	NA	NA	No	YES	No	NA	No	NA	NA	0	0	No	No
I	4723049	4723375	327	1	SPAC17D4.01	SPAC17D4.01.1:exon:1-SPAC17D4.01.1:exon:2	int_967	18	14	4	0	0	14	3	2	A;A;A	AUAACUAAACU;UAUAACUAAAC;GUUACUAACAA	207;208;14	13;4;1	Awan_Short;Awan_Long	304	240	10.8133	10.8422	25.4167	48.2	8.42652	8.51892	GTAAGCTAAATAAAGGGAAGCGAAGCAAGACAAAATATTATATGGTACTAGTACTAGCGATAGTACAACTGCTTGAGAAAAATACAAATAAAATGAACGAATATTACCGAACTATAACTAAACTAAATTCAAATGATGTAGAAATACGAAATTTTGTTATTACTGAATATTTTCTTTATTTTGTTTATATTTTATTTTATTTTGTTTTGTTTTGTTTTGTTTCCTTTTAATTTTCCTTCCTTTTTATTGGAAAAAAAAAAAGAAAACAAAACAAAATAAATATCTTGGAATGCATAATTGTACATCGTTACTAACAATATTCGCTAG	UACUAAC	AACUAAA	207	13	UACUAAC	14	1	NA	YES	No	YES	No	No	SPAC17D4.01_intron1	AACUAAA;UACUAAC	205;12	4;1	YES	No
III	2126522	2126629	108	1	SPCC126.06	SPCC126.06.1:exon:3-SPCC126.06.1:exon:4	int_4792	229	229	0	0	0	77	2	1	A;A	UAUUUUAACAA;CUAUUUUAACA	12;13	222;7	Awan_Short	42	59	7.18284	7.33448	4.77778	8.57143	6.12572	6.10084	GTAGGTAAACTGTATTGGGGTGGATGGATTTTTCATACTTCTTTACCGTGGCTCGTAGAATTTATAGCTTCTACTCTTTTATTTGCATCTATTTTAACAACTATGTAG	UUUUAAC	UUUUAAC	12	222		NA	NA	NA	No	YES	No	No	No	SPCC126.06_intron3	AUUUUAA;UUUUAAC	11;10	1;84	YES	No
II	3309889	3309984	96	-1	SPBC17D11.03c	SPBC17D11.03c.1:exon:2-SPBC17D11.03c.1:exon:1	int_4094	81	81	0	0	0	36	2	1	A;A	GUAACUAACAA;UGUAACUAACA	12;13	73;8	Awan_Short	16	17	2.96045	4.29179	8.5	18	6.31858	6.34238	GTATGATTATAATGATCATGTTTTCTTCGATTTCACTTCAGGTGATGCGAAGATAATAGTATTTTAGCAGCCAAACTGTAACTAACAAATTAATAG	AACUAAC	AACUAAC	12	73		NA	NA	NA	No	YES	No	NA	No	SPBC17D11.03c_intron1	AACUAAC	10	27	YES	No
I	737038	737164	127	1	SPAC22G7.05	SPAC22G7.05.1:exon:1-SPAC22G7.05.1:exon:2	int_162	23	9	14	0	0	17	4	2	A;A;A;A	UAUACUAACUA;GUAUACUAACU;AAACGUGAAUC;UCAAUUGAAAA	11;12;25;38	16;4;2;1	Awan_Short;Awan_Long	120	99	4.26944	4.5115	121	100	4.7582	4.72984	GTAAGTAAATTTTTTTGTAATGGCTTTCTTGCAATCAGTTGAAAAGCAAATCTTTGGCGATTATTCTATTGCTTATGAAATTTCAATTGAAAAGAAAACGTGAATCAGGTATACTAACTAAAATTAG	UACUAAC	UACUAAC	11	16	ACGUGAA	25	2	NA	No	YES	No	NA	No	SPAC22G7.05_intron1	UACUAAC	9	1	YES	No
I	5025124	5025278	155	1	SPAC22E12.04	SPAC22E12.04.1:exon:2-SPAC22E12.04.1:exon:3	int_1054	49	44	5	0	0	25	2	2	A;A	UUAGCUAACGU;CUUAGCUAACG	14;15	42;7	Awan_Short;Awan_Long	20	19	5.95111	6.02053	21	6.66667	6.55171	6.53036	GTAAGTGATAAAACCAATAAGAAATGAGGAAGAAAAGAGAGATTTGTGAGTTCATCCTGCTTTACATTAGTTCATAAAATTGAAAGTAAATTGTTTGACTTCCTCTTTTACTTCCTATTTTTCTCATTTTACTCTTAGCTAACGTAGATTTTCAG	AGCUAAC	AGCUAAC	14	42		NA	NA	NA	No	YES	No	NA	No	SPAC22E12.04_intron2	AGCUAAC	12	7	YES	No
I	3528629	3528762	134	1	SPAC16E8.15	SPAC16E8.15.1:exon:2-SPAC16E8.15.1:exon:3	int_732	214	169	45	0	0	45	3	2	A;A;A	GCAGCUAAUAU;CGCAGCUAAUA;GGUUCGCAGCU	12;13;17	206;7;1	Awan_Short;Awan_Long	157	121	6.07758	6.04415	19.75	24.4	7.67916	7.67141	GTAGGTTTGATTGTTTTTAATGCTATGAGAAAAAGGTTTTTTGTAATATTTTTATTTTAAGTGAATACTAAAAACAGTTTTTTCACTCTTTTCTTTACTTTTTAATTTTTGGTTCGCAGCTAATATATCGCTAG	AGCUAAU	AGCUAAU	12	206	UUCGCAG	17	1	NA	No	YES	No	YES	No	SPAC16E8.15_intron2	CAGCUAA;AGCUAAU	11;10	1;90	YES	No
III	994534	994708	175	-1	SPCC1795.03	SPCC1795.03.1:exon:2-SPCC1795.03.1:exon:1	int_5085	39	32	7	0	0	23	3	2	A;A;A	CAUGCUAAUGG;ACAUGCUAAUG;GUCUCCCACUU	12;13;82	34;4;1	Awan_Short;Awan_Long	8	12	7.50924	7.27137	0.692308	1.08333	4.63255	4.70695	GTAAGTAGTCGCGGTTTTTTTAGGAAGTCTTGTGAATTTCTCTGGTTTGTGGAGTATATGGTCAATCTTCTTATAGAAACACGCATGTCTCCCACTTTTTTTTAGAAAAGCTTCGCTGTTTTTATGTAGAAATATATTTCTGTTTTTCCTATTGTACATGCTAATGGTTAAATAG	UGCUAAU	UGCUAAU	12	34	CUCCCAC	82	1	NA	No	YES	No	YES	No	SPCC1795.03_intron1	UGCUAAU;AUGCUAA	10;11	8;2	YES	No
I	2638211	2638303	93	1	SPAC7D4.02c	SPAC7D4.02c.1:exon:2-SPAC7D4.02c.1:exon:3	int_559	3	3	0	0	0	3	2	1	A;A	UAAUCUAACGG;CUAGUUAAUCU	12;17	2;1	Awan_Short	11	12	5.15825	5.50318	6	6.5	4.38787	3.45317	GTATAGCAACAAATATGCAATTATTATTCTGATTCCAATAACACTTTATGTTATGCCTTCCTTCTCTAGCTAGTTAATCTAACGGTGTTATAG	AUCUAAC	AUCUAAC	12	2	AGUUAAU	17	1	NA	No	YES	No	No	No	SPAC7D4.02c_intron2	AUCUAAC	10	2	YES	No
II	343323	343504	182	-1	SPBC1271.12	SPBC1271.12.1:exon:5-SPBC1271.12.1:exon:4	int_3415	59	29	30	0	0	29	2	2	A;A	UAUACUAACAU;UUAUACUAACA	19;20	51;8	Awan_Short;Awan_Long	158	139	7.35553	7.29136	11.3571	35	7.97883	8.0858	GTATGTGCATGTCATGAATAGAATTGAATGAAACGTAGATTGATTAATATAAATACTGTTGCTTTTGCCAAGCAAGATAATGAAGTTTTTCCTTTTCAGCACTGCTGCTTTGGTTTTACTTTCCTTTTTCTTTTCTTTCCTTGTGGTATCATTTTTTATACTAACATCTCTGTTTCTTATAG	UACUAAC	UACUAAC	19	51		NA	NA	NA	No	YES	No	NA	No	SPBC1271.12_intron5	UACUAAC	17	4	YES	No
I	3299549	3299632	84	-1	SPAPB1E7.06c	SPAPB1E7.06c.1:exon:3-SPAPB1E7.06c.1:exon:2	int_1884	45	45	0	0	0	26	2	1	A;A	CUCGCUAAUCG;UCUCGCUAAUC	19;20	34;11	Awan_Short	0	0	2.3051	1.59691	0.5	1	1.68361	1.18188	GTAAGTTGACAAATATTGTTGCCAGCATTTCCTTCCTTTCCACACTTTTCTTCCACATCTCGCTAATCGTTCATTTGGGGTCAG	CGCUAAU	CGCUAAU	19	34		NA	NA	NA	No	YES	No	NA	No	SPAPB1E7.06c_intron2	CGCUAAU;UCGCUAA	17;18	24;4	YES	No
I	3546915	3547051	137	-1	SPAC1B1.04c	SPAC1B1.04c.1:exon:3-SPAC1B1.04c.1:exon:2	int_1955	13	8	5	0	0	11	1	2	A	AUGACUGACCA	19	13	Awan_Short;Awan_Long	137	87	3.89216	3.73919	5.75	6.28571	6.15309	5.76202	GTATGTGAAGTTGAGTTTTTTTATATGTTTTTGATAGGTTCACCTTTGTTTTCTTTTCGCTTTATAATTATTGCTTTTATTCTTTCTTATTATTTTCTTTTAAAACATTAAATGACTGACCAATTCTCTTTTTTTAG	GACUGAC	GACUGAC	19	13		NA	NA	NA	No	YES	No	NA	No	SPAC1B1.04c_intron2	GACUGAC	17	5	YES	No
I	5369560	5369727	168	-1	SPAC4D7.10c	SPAC4D7.10c.1:exon:3-SPAC4D7.10c.1:exon:2	int_2345	54	38	16	0	0	34	7	2	A;A;A;A;A;A;A	AUUACUAACCC;UAUUACUAACC;CACCAAGAUCG;AUCACCAAGAU;UCAAAACAAAU;AUCGCUGAGUG;GUAAGGCAAUU	8;9;70;72;144;63;161	34;6;5;3;3;2;1	Awan_Short;Awan_Long	3	0	8.74472	8.8637	4	0.5	3.73806	3.83977	GTAAGGCAATTTAATTTTCAAAACAAATAACCGTTCTGCTTTGCAATTGATGAAATATTTGCTTATGATCAATAAATGATTCTTTTATTATCACCAAGATCGCTGAGTGCTAAAGTTTTTGGTTATTTTATTTGTTTTAAATATTTTCGAGTTATTACTAACCCATAG	UACUAAC	UACUAAC	8	34	CCAAGAU	70	5	NA	No	YES	No	NA	No	NA	NA	0	0	No	No
III	2060153	2060314	162	1	SPCC1739.14	SPCC1739.14.1:exon:1-SPCC1739.14.1:exon:2	int_4773	68	67	1	0	0	32	3	2	A;A;A	AUUAUUAACUC;UACGUUUAUUA;AAUUAUUAACU	11;84;12	51;12;5	Awan_Short;Awan_Long	46	34	5.00142	4.98566	23.5	11.6667	5.13845	4.89903	GTAAGTTGATATTAGATTGAACGTTGTGTCGAGTGACAACAAGATTAGAAATATTTCATTACTTAACAGTATACGTTTATTAAATTGCTTTGGCACTCTTGTCTTCTATTCCTTTTTTCTGCTATATATGCCTGAATTTGAATAATTATTAACTCAATCTAG	UAUUAAC	UAUUAAC	11	51	CGUUUAU	84	12	NA	No	YES	No	NA	No	SPCC1739.14_intron1	UAUUAAC	9	13	YES	No
II	244865	244934	70	-1	SPBC31E1.03	SPBC31E1.03.1:exon:2-SPBC31E1.03.1:exon:1	int_3402	1	1	0	0	0	1	1	1	A	AGCUCUAACUA	12	1	Awan_Short	124	91	4.63852	4.70794	15.625	7.07692	7.0781	7.05016	GTATGTTTGACTTATTTTACTTTCTGGGAGCATTGAAATTGGAAAACATAAAGCTCTAACTAAATTTTAG	CUCUAAC	CUCUAAC	12	1		NA	NA	NA	No	YES	No	NA	No	NA	NA	0	0	No	No
I	3612324	3612421	98	1	SPAC17G6.12	SPAC17G6.12.1:exon:2-SPAC17G6.12.1:exon:3	int_738	89	89	0	0	0	46	2	1	A;A	UAUACUUACAU;UAUAUUUAUAU	17;25	87;2	Awan_Short	5	6	2.56813	1.37452	2	2.33333	3.39197	3.68379	GTAAGTTAGTCCAATATTTTGAGATCTGAATACTAGTATATTAGTTATCAGATATTTCATGGCACCTATATTTATATACTTACATACTTTATTTTTAG	UACUUAC	UACUUAC	17	87	UAUUUAU	25	2	NA	No	YES	No	No	No	SPAC17G6.12_intron2	UAUUUAU;UACUUAC	23;15	2;17	YES	No
III	1778695	1778831	137	1	SPCC1442.06	SPCC1442.06.1:exon:3-SPCC1442.06.1:exon:4	int_4723	43	25	18	0	0	25	2	2	A;A	UAAGCUAACUU;UUAAGCUAACU	14;15	42;1	Awan_Short;Awan_Long	66	68	7.16315	7.05711	33.5	69	5.96355	6.13264	GTATGCTTTTTATCATTAAATCGATTTTATTTAAACTATATTATGTTAGATGCAACATTGTTTAAGTAAATTTGTTTCTCTCATCTTCATTATTCTGTTTTTTTTTTACTCTACTTTAAGCTAACTTCATTATTTAG	AGCUAAC	AGCUAAC	14	42		NA	NA	NA	No	YES	No	No	No	SPCC1442.06_intron3	AGCUAAC	12	2	YES	No
I	256446	256541	96	-1	SPAC1639.02c	SPAC1639.02c.1:exon:11-SPAC1639.02c.1:exon:10	int_1161	44	44	0	0	0	29	2	1	A;A	GUGUCUAAUAA;AGUGUCUAAUA	12;13	32;12	Awan_Short	11	7	3.83492	3.98923	2.4	1.6	5.72501	5.5917	GTACGTTAAATGTTTTGTGCTAAGAAGGTTAAGGTGCTACAACTATTTCCTTTTCTGGCTTTTTTGCAAAAATATCAGTGTCTAATAATGGTTTAG	GUCUAAU	GUCUAAU	12	32		NA	NA	NA	No	YES	No	No	No	SPAC1639.02c_intron10	GUCUAAU	10	4	YES	No
III	528093	528189	97	1	SPCP31B10.04	SPCP31B10.04.1:exon:2-SPCP31B10.04.1:exon:3	int_4476	5	5	0	0	0	2	2	1	A;A	GUUGCUAACUA;UGUUGCUAACU	12;13	3;2	Awan_Short	25	18	5.26743	5.69674	5.2	3.8	6.07398	6.18903	GTTCGTTTGTAGAGGAGCGGGAATTCAGCATTACTTCTTGCGGATAGATTTTCTGCTTCTAAAAGCGTTCACTTAATTGTTGCTAACTATTTTTCAG	UGCUAAC	UGCUAAC	12	3		NA	NA	NA	No	YES	No	No	No	NA	NA	0	0	No	No
II	1855796	1855917	122	-1	SPBC3H7.15	SPBC3H7.15.1:exon:2-SPBC3H7.15.1:exon:1	int_3742	3	3	0	0	0	3	1	1	A	UUUACUAACAU	15	3	Awan_Short	53	43	5.46712	5.33647	2.25	2.44444	8.03262	7.96176	GTATGAGATATCTTGGTAATAGTGCTTTTTTTATTTTCTGGGTTTCCGAGTTATTGAAAACCAATGTAATATGATATTTTATGAAGTTTACATAGTCACATTTACTAACATTTAAATTGTAG	UACUAAC	UACUAAC	15	3		NA	NA	NA	No	YES	No	NA	No	SPBC3H7.15_intron1	UACUAAC	13	1	YES	No
III	191403	191525	123	1	SPCC1235.07	SPCC1235.07.1:exon:3-SPCC1235.07.1:exon:4	int_4400	73	64	9	0	0	27	2	2	A;A	AUCACUAAUAU;AAUCACUAAUA	12;13	69;4	Awan_Short;Awan_Long	5	1	1.89241	2.18422	6	2	3.96336	3.51043	GTAAGTTTAAAACACGAACAGGCGAATGTTTTATTCAAGACTTCATCTTAACATATGACACAAAATGAGTTTTCCATTGTTTCAGTTATGTAAATAATCAAGCAATCACTAATATTTTCTTAG	CACUAAU	CACUAAU	12	69		NA	NA	NA	No	YES	No	No	No	SPCC1235.07_intron3	UCACUAA;CACUAAU	11;10	1;36	YES	No
III	200277	200364	88	1	SPCC1235.11	SPCC1235.11.1:exon:2-SPCC1235.11.1:exon:3	int_4405	131	131	0	0	0	46	2	1	A;A	UUUGCUAAUAA;CUUUGCUAAUA	9;10	115;16	Awan_Short	1674	1019	7.14487	6.67547	38.9535	56.6667	10.5056	9.94599	GTAAGTAGATGGAAAGGTTTAAAGATTGCTATCTCTCGTTTTTTTTATATTATTTATGGTTTAAAAGATTTCTTTGCTAATAAGATAG	UGCUAAU	UGCUAAU	9	115		NA	NA	NA	No	YES	No	No	No	SPCC1235.11_intron2	UUGCUAA;UGCUAAU	8;7	1;66	YES	No
III	2246449	2246602	154	1	SPCC790.03	SPCC790.03.1:exon:2-SPCC790.03.1:exon:3	int_4847	85	6	79	0	0	11	3	2	A;A;A	ACGUCGAACCU;UUUAUUAACUU;GUUUAUUAACU	48;13;14	76;8;1	Awan_Long;Awan_Short	16	9	6.38482	6.32532	2.42857	2	3.86166	3.48429	GTAAGCATTTCTTATAATTATGGTTGCAGATGCATACTTCCACACGTCTTCTTTCCTCACAATGTTAAGAAACAACCTGGTTTGTATGATTTTTTGCAAACGTCGAACCTCTCTTGTCTTTTAAATGATGGCGGTTTATTAACTTATTTTTTAG	UAUUAAC	GUCGAAC	48	76	UAUUAAC	13	8	NA	YES	No	YES	NA	No	NA	NA	0	0	No	No
I	2607959	2608088	130	1	SPAC823.15	SPAC823.15.1:five_prime_UTR:1-SPAC823.15.1:exon:1	int_555	301	187	114	0	0	79	3	2	A;A;A	UUUAUUAACUA;GUUUAUUAACU;AAAAUUUAGUC	14;15;26	251;49;1	Awan_Short;Awan_Long	22	7	4.6199	4.28879	4.6	1.33333	4.09538	4.20662	GTAAGTGGGAAGTTGAAAAACGCATGCTCAACGCAGGATAGCATACAAACGGAAAAGCCCTTATGGATTTTTCTGTGGATGCTTTTCTTTTTAATTAAAAATTTAGTCGTTTATTAACTATTGCTTTAAG	UAUUAAC	UAUUAAC	14	251	AAUUUAG	26	1	NA	No	YES	No	NA	No	SPAC823.15_intron1	UAUUAAC	12	10	YES	No
III	1823678	1823765	88	1	SPCC285.14	SPCC285.14.1:exon:2-SPCC285.14.1:exon:3	int_4735	77	77	0	0	0	49	3	1	A;A;A	CGCACUAACAU;ACGCACUAACA;GACACGCACUA	15;16;19	60;15;2	Awan_Short	4	9	4.61649	5.01522	5	10	3.6364	3.48461	GTAAGTACAGTAAGGAAAGTTGACCTTGTAACCTACCATCAGCTTCCATAGTTATTCTGATTGACACGCACTAACATTGTAAAAAAAG	CACUAAC	CACUAAC	15	60	CACGCAC	19	2	NA	No	YES	No	NA	No	SPCC285.14_intron2	GCACUAA;CACUAAC	14;13	1;38	YES	No
III	1897216	1897323	108	-1	SPCC737.06c	SPCC737.06c.1:exon:2-SPCC737.06c.1:exon:1	int_5242	14	14	0	0	0	12	3	1	A;A;A	UAUUCUAACAU;GUAUUCUAACA;UAGGCAUAAAU	12;13;24	11;2;1	Awan_Short	4	2	7.66772	7.95407	2.5	3	6.31355	6.327	GTAAGCAAATGATGAATTGGACATTCAAACGAGTATCGTACTGCTTGGGTTTGGGCAGAAATATACTTGAATATTTGTAGGCATAAATGTATTCTAACATATTTCTAG	UUCUAAC	UUCUAAC	12	11	GGCAUAA	24	1	NA	No	YES	No	NA	No	SPCC737.06c_intron1	UUCUAAC;GGCAUAA	10;22	5;1	YES	No
I	419503	419601	99	-1	SPAC31A2.15c	SPAC31A2.15c.1:exon:2-SPAC31A2.15c.1:exon:1	int_1208	53	53	0	0	0	29	2	1	A;A	UGAUCUAACAU;AUGAUCUAACA	13;14	51;2	Awan_Short	10	3	4.03153	3.6818	5.5	4	3.34392	2.69819	GTATGTGTTTCCTTGTGTATAAATAACCTGAAGTTGAATCATTACTTTTTTATTTTTTATATCGCTATTTGACAACTTATGATCTAACATCGATAATAG	AUCUAAC	AUCUAAC	13	51		NA	NA	NA	No	YES	No	No	No	SPAC31A2.15c_intron1	AUCUAAC	11	3	YES	No
I	756611	756778	168	-1	SPAC4G8.02c	SPAC4G8.02c.1:exon:3-SPAC4G8.02c.1:exon:2	int_1280	50	46	4	0	0	22	3	2	A;A;A	AUUAUUAACAU;GAUUAUUAACA;GAUUGGCAUCG	13;14;26	46;3;1	Awan_Short;Awan_Long	58	34	9.11374	9.08876	2.95	1.75	7.3842	7.56776	GTAAGTAAAAAATAGATAAAGGAAACGAAATTCCTGGAAATAATAGTAATTCCTAAACGAATATTTTGTTTCCTTGGATTTTGTAGCACATAAACTCTGTTTTAGTCTGCTTATTTTTCTTTCAAATTTTTCTTCGATTGGCATCGTGATTATTAACATTAATATTAG	CAUUAAU	UAUUAAC	13	46	UUGGCAU	26	1	NA	No	No	No	NA	No	SPAC4G8.02c_intron2	UAUUAAC	11	5	YES	No
II	3620273	3620424	152	-1	SPBC16D10.11c	SPBC16D10.11c.1:exon:2-SPBC16D10.11c.1:exon:1	int_4178	150	99	51	0	0	60	3	2	A;A;A	GAUAUUAACAU;UGAUAUUAACA;AUACUCAAGUG	9;10;55	144;5;1	Awan_Short;Awan_Long	557	580	8.05088	8.18258	111.6	193.667	9.05105	9.36032	GTAAGTAAATATTATAATTTCTGTTTCAACACCTTTCCCTATTATTATTGCGTTTAAATTGCATTTTTATAGCAGCTTTTTTGGGCAAAGATACTCAAGTGTGAAATTATTAAAATAATTCGTTTTCCTCTGATGTGATATTAACATTATAG	CUCUGAU	UAUUAAC	9	144	ACUCAAG	55	1	NA	No	No	No	YES	No	SPBC16D10.11c_intron1	UAUUAAC	7	27	YES	No
III	883703	883821	119	1	SPCC16A11.08	SPCC16A11.08.1:exon:2-SPCC16A11.08.1:exon:3	int_4564	30	30	0	0	0	19	2	1	A;A	UUUAUUAACAU;GUUUAUUAACA	47;48	28;2	Awan_Short	0	0	0.802603	-0.227502	0.5	1	1.92923	0.899122	GTAAGTTTTCCAATATATTTAGATATAATATCTTTCATCGCGTTTTTTCATTTTCTTTTCAAACGTTTATTAACATGGGCTGTGTGCAATTCATTGTACACACATGCTCCGCTGTTTAG	UAUUAAC	UAUUAAC	47	28		NA	NA	NA	No	YES	No	NA	No	SPCC16A11.08_intron2	UAUUAAC	45	3	YES	No
III	627698	627792	95	-1	SPCC31H12.04c	SPCC31H12.04c.1:exon:2-SPCC31H12.04c.1:exon:1	int_5004	57	57	0	0	0	41	2	1	A;A	UUUGCUAACAA;AUUUGCUAACA	13;14	47;10	Awan_Short	229	222	3.50607	3.62101	115	223	5.51604	5.77085	GTAAGTAGTTTTCCTAGTGAATTCGTTTATTTTTTTTTATTCAATTTACTTCATTCACATTCTTATGAATACTCATTTGCTAACAATCCTTTTAG	UGCUAAC	UGCUAAC	13	47		NA	NA	NA	No	YES	No	NA	No	SPCC31H12.04c_intron1	UGCUAAC	11	18	YES	No
I	3100668	3100746	79	1	SPAC589.04	SPAC589.04.1:exon:1-SPAC589.04.1:exon:2	int_647	22	22	0	0	0	18	2	1	A;A	UGUACUAACAA;UUGUACUAACA	11;12	18;4	Awan_Short	7	6	3.39363	2.36352	8	7	5.89732	5.79797	GTACGTTTAATAATTTTTGATAGCAGTTAGTCTTCTAGACCGAGCATTTTGAAGCATGATTTGTACTAACAAAGCTTAG	UACUAAC	UACUAAC	11	18		NA	NA	NA	No	YES	No	No	No	SPAC589.04_intron1	UACUAAC	9	5	YES	No
I	1418441	1418508	68	-1	SPAC20G8.09c	SPAC20G8.09c.1:exon:3-SPAC20G8.09c.1:exon:2	int_1445	46	46	0	0	0	34	2	1	A;A	UUUAUUAACCC;UUUUAUUAACC	10;11	31;15	Awan_Short	95	86	4.28802	4.70912	24	29	5.29688	5.36437	GTATGAGACCCAATGATGAAAACACCCAGCTTGTTTAGAAAGAATTAAACTTTTATTAACCCATATAG	UAUUAAC	UAUUAAC	10	31		NA	NA	NA	No	YES	No	NA	No	SPAC20G8.09c_intron2	UAUUAAC	8	13	YES	No
II	296534	296705	172	-1	SPBC1773.07c	SPBC1773.07c.1:exon:2-SPBC1773.07c.1:exon:1	int_3408	126	114	12	0	0	29	4	2	A;A;A;A	AAUACUAACUU;GAAUACUAACU;AGAAUGUAGUA;UCUGAAUACUA	12;13;27;16	109;13;3;1	Awan_Short;Awan_Long	69	108	9.13781	9.08574	70	54.5	6.6726	7.52026	GTATGTCCAATTAGATTAATGGTTGCATTTCTAGACGTTGAAAAGACATTATGCTACGTGTTGTTGAAATACTTTTTCTTAATACATTAAAGCTCACTGTCCTTTCGTGTCTTGACTATTTCTTTTCTCTGGTTTCTCAGAATGTAGTATCTGAATACTAACTTGTTTTTAG	UACUAAC	UACUAAC	12	109	AAUGUAG	27	3	NA	No	YES	No	YES	No	SPBC1773.07c_intron1	UACUAAC;AUACUAA	10;11	4;1	YES	No
II	4073766	4073870	105	1	SPBC1347.07	SPBC1347.07.1:exon:1-SPBC1347.07.1:exon:2	int_3298	60	60	0	0	0	19	2	1	A;A	UUUACUAAUAU;UUUUACUAAUA	8;9	58;2	Awan_Short	2	1	1.24621	2.53802	1	2	-0.130028	-2.64549	GTATGTTTAGATTCAGTCTATCAAGTTATCATTTCTACAATTTACATGTTTAAGTTTCTTTTTGTCGATGTGTACCTCAGTTTTTAAACTTTTACTAATATAAAG	UACUAAU	UACUAAU	8	58		NA	NA	NA	No	YES	No	No	No	SPBC1347.07_intron1	UACUAAU	6	32	YES	No
III	1747818	1747895	78	-1	SPCC1450.10c	SPCC1450.10c.1:exon:2-SPCC1450.10c.1:exon:1	int_5202	99	99	0	0	0	38	3	1	A;A;A	CCAACUAACAU;ACCAACUAACA;UUCAACCAACU	9;10;14	95;3;1	Awan_Short	11	10	4.64467	4.73945	12	11	3.146	3.03927	GTAAGATGCATTGGAAGAGCAGCAAGTATAACATCTGTCACATCTCTATTTTTTTTGTTCAACCAACTAACATGATAG	AACUAAC	AACUAAC	9	95	CAACCAA	14	1	NA	No	YES	No	NA	No	SPCC1450.10c_intron1	AACUAAC	7	37	YES	No
III	602430	602516	87	-1	SPCC1183.05c	SPCC1183.05c.1:exon:3-SPCC1183.05c.1:exon:2	int_4999	53	53	0	0	0	19	2	1	A;A	AUUGCUAAUUU;AAUUGCUAAUU	9;10	50;3	Awan_Short	1	3	4.142	4.03171	2	4	1.19227	1.48408	GTACGACTTAAAATTGTTAGACCACTAAATCGCATTACATAAAGTGTCTTAATCGGTGTCTTGAATTTCTAATTGCTAATTTTCTAG	UGCUAAU	UGCUAAU	9	50		NA	NA	NA	No	YES	No	NA	No	SPCC1183.05c_intron2	UGCUAAU	7	28	YES	No
I	2637809	2637978	170	1	SPAC7D4.02c	SPAC7D4.02c.1:exon:1-SPAC7D4.02c.1:exon:2	int_558	11	11	0	0	0	7	2	1	A;A	UUGACUAAUCU;UUUGACUAAUC	15;16	9;2	Awan_Short	22	11	5.52068	5.82776	11.5	12	4.84497	4.02575	GTAAGTTGAAGCTTAAATTAATTTCGAAGAGAAGCATCTTATTCCATTTGATACTCTCGAATCATTAATTTTTAAGTATTTTTTTAATGATGGGTTATCCTTATTATATTTCGAACTGACACAAATGTGTAATAATTCATTTCAAACTTTGACTAATCTACTTTATAAAG	GACUAAU	GACUAAU	15	9		NA	NA	NA	No	YES	No	NA	No	NA	NA	0	0	No	No
III	749050	749159	110	1	SPCC14G10.04	SPCC14G10.04.1:exon:2-SPCC14G10.04.1:exon:3	int_4532	86	86	0	0	0	55	4	1	A;A;A;A	UAUACUAACAA;UUAUACUAACA;AGAUUUUAUAC;UUUAGAGAUUU	16;17;22;27	62;17;4;3	Awan_Short	104	71	8.17533	8.08806	21	14.4	7.51299	7.55482	GTAGGGCAGAAATATGAATACTGTGAATTTCGCGACACAAATTGATTTTAGTTCTTTATTTGCACTTCATAAGTTCTTTAGAGATTTTATACTAACAAATTTTTGTATAG	UACUAAC	UACUAAC	16	62	AUUUUAU	22	4	NA	No	YES	No	NA	No	SPCC14G10.04_intron2	AUUUUAU;UACUAAC	20;14	2;34	YES	No
II	771856	771985	130	1	SPBC577.11	SPBC577.11.1:exon:2-SPBC577.11.1:exon:3	int_2496	4	3	1	0	0	4	1	2	A	AUUACUCACAU	13	4	Awan_Short;Awan_Long	39	37	4.87668	4.89286	4.44444	3.16667	5.44587	5.44971	GTACGTTTGAAATGTCATTTAAGCGAGTAATGTATCTTCCTTCATGGATGAAAAAATTTTTATTTCAAGCATACATTATTTGCTTATATTTACCATTATTATTGTATTTAATTACTCACATTTGTTTCAG	AUUUAAU	UACUCAC	13	4		NA	NA	NA	No	No	No	NA	No	NA	NA	0	0	No	No
I	2366265	2366380	116	-1	SPAC17G8.13c	SPAC17G8.13c.1:exon:2-SPAC17G8.13c.1:exon:1	int_1674	52	52	0	0	0	31	3	1	A;A;A	CGGACUAACAU;ACGGACUAACA;CAUUAAAAGAU	10;11;45	46;5;1	Awan_Short	7	7	7.2556	7.20163	8	2	3.34306	3.08234	GTAAACAACTTTTCAAGTAAGATCATAATGTTATTCGCTATTGCTTGAGTTTAAACGAGGTGTACATTAAAAGATCATAATCTATCCAAATTGAATTTACGGACTAACATAATCAG	GACUAAC	GACUAAC	10	46	UUAAAAG	45	1	NA	No	YES	No	NA	No	SPAC17G8.13c_intron1	GACUAAC	8	11	YES	No
I	4005062	4005153	92	1	SPAC27E2.02	SPAC27E2.02.1:exon:1-SPAC27E2.02.1:exon:2	int_841	195	195	0	0	0	56	4	1	A;A;A;A	CUAGCUAACGC;CCUAGCUAACG;AGAUCCUAGCU;CUUUCAGAUCC	8;9;13;18	157;31;6;1	Awan_Short	6	8	3.60681	4.53605	7	4.5	5.55131	5.56605	GTAAGTTTGTTTTTCAGATATCCAGTGCTAAACACTTCTCCTACTCACGAGGAAAATTACTACATGTCTTTCAGATCCTAGCTAACGCATAG	AGCUAAC	AGCUAAC	8	157	AUCCUAG	13	6	NA	No	YES	No	NA	No	SPAC27E2.02_intron1	AUCCUAG;AGCUAAC	11;6	1;31	YES	No
II	1450795	1450886	92	-1	SPBC32H8.01c	SPBC32H8.01c.1:exon:3-SPBC32H8.01c.1:exon:2	int_3672	39	39	0	0	0	29	2	1	A;A	UUUUUUAACCA;UUUUUUUAACC	19;20	32;7	Awan_Short	0	0	1.17386	1.9511	0.5	0.2	-0.116353	-0.824529	GTAAGTAATCATTGTGAAAACCTTCATGGTTTGAGTTGATACATAATTTAATGGGAAGGAAAAAGTTTTTTTAACCAACAAAATAAAAATAG	UUUUAAC	UUUUAAC	19	32		NA	NA	NA	No	YES	No	NA	No	SPBC32H8.01c_intron2	UUUUAAC	17	10	YES	No
II	774486	774580	95	1	SPBC577.12	SPBC577.12.1:exon:1-SPBC577.12.1:exon:2	int_2497	21	21	0	0	0	15	2	1	A;A	AAUACUAACUU;GAAUACUAACU	9;10	20;1	Awan_Short	78	70	5.65112	5.71215	26.3333	23.6667	5.07844	4.96858	GTAAGTTACATATTGATTGTCTTCGTTAATCATATTCTTGATTCGGCTATGCCACCGAACATTTCCTTTAAACCGCTAGAATACTAACTTCCTAG	UACUAAC	UACUAAC	9	20		NA	NA	NA	No	YES	No	NA	No	SPBC577.12_intron1	UACUAAC	7	3	YES	No
III	906465	906651	187	1	SPCC24B10.03	SPCC24B10.03.1:exon:1-SPCC24B10.03.1:exon:2	int_4565	1	1	0	0	0	1	1	1	A	UAUGUAAAAGG	36	1	Awan_Short	29	11	4.22091	4.36833	15	2.4	4.33063	3.93523	GTATGGTACTAAACAGCATAAGCACAATTATTAATTTTGAACACTCATTATAATCTGTGTAAATTTTAATCAATTGACTATTATTTCACTCTATTTTTAATACTTTAAAAGAATGAGGATTGTGCAAATCGAAAATTGAATAAATATGTAAAAGGAGTACATACTAACCCATTTATTATTTTTGTAG	UACUAAC	UGUAAAA	36	1		NA	NA	NA	No	No	No	No	No	NA	NA	0	0	No	No
II	4092385	4092539	155	1	SPBC56F2.10c	SPBC56F2.10c.1:exon:1-SPBC56F2.10c.1:exon:2	int_3305	106	80	26	0	0	44	2	2	A;A	UUCAUUAACCC;AUUCAUUAACC	12;13	101;5	Awan_Short;Awan_Long	9	5	9.0264	8.89202	2.5	0.857143	2.80989	2.41204	GTAAGCAATATTAGCTAGCATGCTTCTCATTCATGTCCACCCGTCGGTAAATAAGGTCGTTGCGGGCAGAACCTGTTTAGTTTATCTGTACTTTCGATTTTTTGATGTGACATTAGACCAAATTTTTCCCCGAATATTCATTAACCCAAATATAG	CAUUAAC	CAUUAAC	12	101		NA	NA	NA	No	YES	No	NA	No	SPBC56F2.10c_intron1	CAUUAAC	10	15	YES	No
III	216079	216186	108	1	SPCC1235.15	SPCC1235.15.1:exon:2-SPCC1235.15.1:exon:3	int_4410	37	37	0	0	0	23	2	1	A;A	AUUUCUAACCU;AAUUUCUAACC	15;16	36;1	Awan_Short	21	11	3.906	3.49737	3.14286	6	6.44617	6.48273	GTATGTTATGATGGAGAACCCGGAAATTAGAGGCTACTCTACATCAGTGTTTTCCCTTTTAATTCCACACATAGTTTTCTTATTTAATTTCTAACCTTATGCTATTAG	UUCUAAC	UUCUAAC	15	36		NA	NA	NA	No	YES	No	NA	No	SPCC1235.15_intron2	UUCUAAC	13	11	YES	No
II	1535465	1535606	142	-1	SPBC83.14c	SPBC83.14c.1:exon:3-SPBC83.14c.1:exon:2	int_3692	26	25	1	0	0	22	2	2	A;A	CGUACUAACAU;UCGUACUAACA	13;14	21;5	Awan_Short;Awan_Long	279	203	7.33687	7.12118	56	51	6.05105	5.80419	GTATGTCTTCACTGTAAAGTGAAATCAATATGGAATTTTTGTGCTCTTTTTTGTTCCTAGGTGTCTCATGTTATATTCTGGTTGGTGAACTTTCAATTCTTTTCCTTATTTTTATCTGCGCTCGTACTAACATGCTCCTTAG	UACUAAC	UACUAAC	13	21		NA	NA	NA	No	YES	No	No	No	SPBC83.14c_intron2	UACUAAC;GUACUAA	11;12	6;1	YES	No
II	2184099	2184222	124	-1	SPBC17G9.08c	SPBC17G9.08c.1:exon:4-SPBC17G9.08c.1:exon:3	int_3818	13	9	4	0	0	9	2	2	A;A	AUUACUAACUU;UAUUACUAACU	13;14	12;1	Awan_Short;Awan_Long	11	12	4.42129	4.32781	3	2.6	5.85979	5.78096	GTATGTCTTTGGTTATGATTGAAATAAGAAGTCTAAAAAAATGATGGTTTTCTTTTCCTTTATTAGAATCTCTTTTTTCAGAAATGATTTTTACTTTTAGCGGTATTACTAACTTTTGATTCAG	UACUAAC	UACUAAC	13	12		NA	NA	NA	No	YES	No	NA	No	SPBC17G9.08c_intron3	UACUAAC	11	1	YES	No
I	1339701	1339868	168	-1	SPAC6F12.13c	SPAC6F12.13c.1:exon:2-SPAC6F12.13c.1:exon:1	int_1425	42	42	0	0	0	25	1	1	A	AACCCUAACCA	13	42	Awan_Short	134	137	7.68187	7.77682	7.5	5.52	6.77237	6.75476	GTAAGTGATAAATTTTTTAAACATTGAAAAATGTTCGTGCGTTTTGCTATTTAGCAGCTCAAGGTATTGGAATTTTGTTCCTGACAACCGAGGGTTACGCTTTTGTATGATTATTGTTTGATGCAAAACGCATTTGTTATTTCATTGAAACCCTAACCAAATTCTTAG	CCCUAAC	CCCUAAC	13	42		NA	NA	NA	No	YES	No	No	No	SPAC6F12.13c_intron1	CCCUAAC	11	6	YES	No
II	3430494	3430580	87	1	SPBC4B4.09	SPBC4B4.09.1:exon:4-SPBC4B4.09.1:exon:5	int_3163	47	47	0	0	0	24	2	1	A;A	AAGGCUAACGU;AAAGGCUAACG	9;10	40;7	Awan_Short	8	10	3.7399	4.39428	3	11	5.56813	5.47465	GTACGGACAAATTACCATTAACATTCGTAATTGTCTCAATTAATTTTGTGATCAAATTCAATTTAAGCTCAAAGGCTAACGTCGTAG	GGCUAAC	GGCUAAC	9	40		NA	NA	NA	No	YES	No	No	No	SPBC4B4.09_intron4	GGCUAAC	7	16	YES	No
II	2793728	2793818	91	-1	SPBC32F12.05c	SPBC32F12.05c.1:exon:3-SPBC32F12.05c.1:exon:2	int_3956	79	79	0	0	0	36	2	1	A;A	UAUUCUAACCA;GUAUUCUAACC	11;12	60;19	Awan_Short	13	20	5.39125	5.51706	7	10.5	2.53114	2.75584	GTACGTCCTAGATTGTTTTATTAGCAAATTTAATTAACTTGCTAAACTTGATTCCGCTTTTATCATTTCTGTGTATTCTAACCATGAATAG	UUCUAAC	UUCUAAC	11	60		NA	NA	NA	No	YES	No	No	No	SPBC32F12.05c_intron2	UUCUAAC	9	12	YES	No
I	3114974	3115102	129	-1	SPAC688.03c	SPAC688.03c.1:exon:2-SPAC688.03c.1:exon:1	int_1852	27	25	2	0	0	8	2	2	A;A	AAUGCUAAUAC;AAAGAAGAGUA	20;35	25;2	Awan_Short;Awan_Long	12	4	3.53418	3.904	6.5	2.5	4.91476	4.63582	GTAAGTGTGTCTAAAAATGGTTCATAGTTCGTTGTAGGCGTCAATGATAAATCATAGACCTTCGTATGAAATTGCCGATGAAATTGAAAAGAAGAGTAACCGAATGCTAATACAACATTTTAAAAATAG	UGCUAAU	UGCUAAU	20	25	AGAAGAG	35	2	NA	No	YES	No	YES	No	NA	NA	0	0	No	No
I	4479296	4479376	81	-1	SPAC17C9.12	SPAC17C9.12.1:exon:3-SPAC17C9.12.1:exon:2	int_2162	5	5	0	0	0	5	2	1	A;A	UGUUCUAACCA;AUGUUCUAACC	16;17	4;1	Awan_Short	105	99	4.28356	4.02789	26.5	100	7.4963	7.55279	GTATGTGATAAAAGATATACTTACATTTACTTTTTTAATACATGCCATACATAATTGATGTTCTAACCAATACTTTAATAG	UUCUAAC	UUCUAAC	16	4		NA	NA	NA	No	YES	No	No	No	NA	NA	0	0	No	No
II	246298	246427	130	1	SPBC31E1.04	SPBC31E1.04.1:exon:1-SPBC31E1.04.1:exon:2	int_2392	23	16	7	0	0	21	2	2	A;A	UUUACUAACAA;UUUUACUAACA	16;17	20;3	Awan_Short;Awan_Long	69	58	4.96783	5.35918	4.11765	4.91667	5.6213	5.6087	GTAAGTATCAGCTAGTTGACATTTTTTTTTTTTCTGTTTACGTGATGGAGTTAGGAGTAATGCTAAATACTTGACCTAAAATATTTTCGCTTTTATAAATTTAAAGTTTTACTAACAATTTTCTTTTTAG	UACUAAC	UACUAAC	16	20		NA	NA	NA	No	YES	No	No	No	SPBC31E1.04_intron1	UACUAAC	14	2	YES	No
II	3611210	3611372	163	-1	SPBC16D10.07c	SPBC16D10.07c.1:exon:2-SPBC16D10.07c.1:exon:1	int_4177	53	46	7	0	0	33	3	2	A;A;A	AAAGUUAACGA;AAAAGUUAACG;UAUUUUAAUUA	12;13;28	41;11;1	Awan_Short;Awan_Long	1	1	3.98095	3.67612	0.285714	1	3.2905	3.32208	GTATGAATATCAACTATTAACTCCAATACCTTCAAGGGTACGCGCAAGTCTATTTGAATTTACAAAATTTACAATTGATCAACGATTTTGAGTTCAGGTTAGCTATGTGCTTTTCATATACTTTAGTTTATTTTAATTATTTAAAAAGTTAACGATTCCTTAG	AGUUAAC	AGUUAAC	12	41	UUUUAAU	28	1	NA	No	YES	No	NA	No	SPBC16D10.07c_intron1	AGUUAAC	10	1	YES	No
II	2507023	2507116	94	1	SPBC365.06	SPBC365.06.1:exon:1-SPBC365.06.1:exon:2	int_2907	92	92	0	0	0	41	2	1	A;A	GAAGCUAACUU;UGAAGCUAACU	11;12	79;13	Awan_Short	173	141	5.95018	5.50503	17.4	23.6667	6.31529	6.45067	GTGTGTGCTACAGCAAGAGACTTTCATGCTATTCCTGTCATCTTTTGCTTTCAAAAGTCTTTAATGCACGAATCGTGAAGCTAACTTGATGTAG	AGCUAAC	AGCUAAC	11	79		NA	NA	NA	No	YES	No	NA	No	SPBC365.06_intron1	AAGCUAA;AGCUAAC	10;9	1;24	YES	No
I	777732	777890	159	1	SPAC4G8.08	SPAC4G8.08.1:exon:2-SPAC4G8.08.1:exon:3	int_170	25	14	11	0	0	16	3	2	A;A;A	CUUUCUAACUU;UCUUUCUAACU;UUUGUUAAUUC	13;14;25	21;3;1	Awan_Short;Awan_Long	10	8	3.42016	3.39881	2.2	4.5	4.86196	4.81343	GTATGTGAATCTTTTTTATTTATTTATTAAATTTTCTTTAAATGAGAATCTAAACAATCTAAAGCTTTACGGCCTTTGGGGGAAATTAAAAAACAAAAATAGACTTAATCAAATTTTTGATTAATCTTTTGTTAATTCTCTTTCTAACTTAAATTATAG	UUCUAAC	UUCUAAC	13	21	UGUUAAU	25	1	NA	No	YES	No	No	No	SPAC4G8.08_intron2	UGUUAAU;UUCUAAC	23;11	1;9	YES	No
I	2377653	2377764	112	1	SPAC22H10.04	SPAC22H10.04.1:exon:2-SPAC22H10.04.1:exon:3	int_512	191	190	1	0	0	57	3	2	A;A;A	GUUGCUAACUA;CGUUGCUAACU;ACAGCACAUGC	11;12;32	160;29;2	Awan_Short;Awan_Long	3	1	6.52813	7.39133	1	1	3.61806	3.42444	GTAAGTTAAAATGATGTTCATTAGAATCACATTAGCTGATTACTACAAATCATTAAAACTGAACATTGAGAACACAGCACATGCTTTATTATTCGTTGCTAACTATTTGAAG	UGCUAAC	UGCUAAC	11	160	AGCACAU	32	2	NA	No	YES	No	NA	No	SPAC22H10.04_intron2	UGCUAAC	9	36	YES	No
III	1617648	1617767	120	-1	SPCC777.12c	SPCC777.12c.1:exon:2-SPCC777.12c.1:exon:1	int_5180	77	73	4	0	0	38	3	2	A;A;A	UGUACUAACUA;CUGUACUAACU;AAUUUUGAGCC	11;12;61	67;5;5	Awan_Short;Awan_Long	116	122	7.71415	7.80753	13	30.75	6.05193	5.97942	GTAAGTAATGGACTGCATTTAATGTTGTCCAAATGCTCTTGTTATGAGATTGAATTTTGAGCCTCGGAAATAAATTAAACCATCTTTGGATTTAATTGAATCTGTACTAACTAATTTTAG	AACUAAU	UACUAAC	11	67	UUUUGAG	61	5	NA	No	No	No	NA	No	SPCC777.12c_intron1	UACUAAC	9	30	YES	No
I	4588724	4588868	145	1	SPAC12B10.09	SPAC12B10.09.1:exon:2-SPAC12B10.09.1:exon:3	int_934	24	21	3	0	0	21	4	2	A;A;A;A	UAAACUAACUC;CUCACUAACGC;ACUCACUAACG;AUAAACUAACU	18;10;11;19	15;6;2;1	Awan_Short;Awan_Long	12	4	2.71914	2.57485	2.6	1.66667	4.96351	5.1006	GTATGAAAAAAAAGAAAGAAAGTAATCTAAATGTATGGTTTCTTTCTCTGGTCTTAACAAACGATAGACACTTATTAAATTACCTCTTATAATATATTACAAAGTTCACAAAGTGTATAATAAACTAACTCACTAACGCTACTAG	CACUAAC	AACUAAC	18	15	CACUAAC	10	6	NA	YES	No	No	No	No	SPAC12B10.09_intron2	AACUAAC;CACUAAC	16;8	4;2	YES	No
I	1604397	1604529	133	1	SPAC23H4.03c	SPAC23H4.03c.1:exon:1-SPAC23H4.03c.1:exon:2	int_350	19	9	10	0	0	14	2	2	A;A	CUUUCUGACUG;CUGACUGACAU	18;14	12;7	Awan_Short;Awan_Long	349	234	6.64213	6.61202	87.5	78.3333	7.68561	7.57164	GTATGGTACTATATCTAAAAGTCGTATTTACTTCAACGGCTATTTTGATTTGTTTACGTTGTTTAGATCCCTTTCTTTCTTTGAAAAAGAAATCCTTTATGAGTTTAGCTTTCTGACTGACATTTAAATGTAG	GACUGAC	UUCUGAC	18	12	GACUGAC	14	7	NA	YES	No	No	NA	No	NA	NA	0	0	No	No
I	3018074	3018198	125	-1	SPAC31G5.16c	SPAC31G5.16c.1:exon:2-SPAC31G5.16c.1:exon:1	int_1820	80	68	12	0	0	40	4	2	A;A;A;A	AAUACUAACUA;UAAUACUAACU;GCAUAAUACUA;UUUUGUGACAG	10;11;14;73	54;23;2;1	Awan_Short;Awan_Long	103	133	6.01703	6.41576	34.6667	44.6667	7.11511	7.14495	GTATGTTGATGATATTTAGTTTTCTAATTGAAGCCAACAAGAAATTTTTGTGACAGACTTCTTCCTTATTACTCTCCTAATCTAGATGAATAGTCAATTTCATGGCATAATACTAACTATTTTAG	UACUAAC	UACUAAC	10	54	AUAAUAC	14	2	NA	No	YES	No	YES	No	SPAC31G5.16c_intron1	UACUAAC	8	28	YES	No
II	1404843	1404973	131	-1	SPBC17A3.03c	SPBC17A3.03c.1:exon:2-SPBC17A3.03c.1:exon:1	int_3664	63	56	7	0	0	22	2	2	A;A	UUAGCUAACCC;AUUAGCUAACC	13;14	55;8	Awan_Short;Awan_Long	57	38	4.12342	3.63388	9.66667	9.75	6.1087	6.12843	GTAAGCTTTCCACCATCTTAACTTGTTGCACACTTTGTTTAAAAATTAAAAAGATATTTTAATTATTCTTCATTCCTTGTTTCAAGTTTTTTTTTAATTACTTTACTTTGATTAGCTAACCCGCTTGCTAG	AGCUAAC	AGCUAAC	13	55		NA	NA	NA	No	YES	No	No	No	SPBC17A3.03c_intron1	AGCUAAC	11	6	YES	No
II	869836	869939	104	-1	SPBC713.02c	SPBC713.02c.1:exon:3-SPBC713.02c.1:exon:2	int_3548	13	13	0	0	0	10	2	1	A;A	UUUGCUAACUA;UUUUGCUAACU	11;12	11;2	Awan_Short	149	103	4.82479	5.03295	37.5	20.8	5.67389	5.1217	GTAAGTGTTGATTAAAAGTTTGTTTCGATTATTTTTGAGACTTTTGTCAAGTTTCGAAAGGGATTTACAGAATTATTGTTTTATTTTTTGCTAACTAGATACAG	UGCUAAC	UGCUAAC	11	11		NA	NA	NA	No	YES	No	No	No	SPBC713.02c_intron2	UGCUAAC	9	2	YES	No
I	386615	386785	171	1	SPAC1751.03	SPAC1751.03.1:exon:2-SPAC1751.03.1:exon:3	int_44	78	35	43	0	0	39	3	2	A;A;A	AUUACUAACAC;UAUUACUAACA;UGCUAUUACUA	11;12;15	63;12;3	Awan_Short;Awan_Long	256	170	7.84028	7.8193	64.25	57	8.07945	7.63007	GTAATGCAAAATAGTTTTAGGCTAGGAAATTAAAGAATTATTTTAATAAGTGCTAAAGGGCATTTGTTATATTGTTAGTTCTGAAAGTATACTATGAGCTGATGTGTTTGGTTTGCAGCTTTCCAAGTTTTCGCTTATTTTCTCTTCCATGCTATTACTAACACGAAACAG	UACUAAC	UACUAAC	11	63	CUAUUAC	15	3	NA	No	YES	No	NA	No	SPAC1751.03_intron2	UACUAAC	9	10	YES	No
III	2157046	2157129	84	-1	SPCC1620.07c	SPCC1620.07c.1:exon:3-SPCC1620.07c.1:exon:2	int_5301	32	32	0	0	0	17	2	1	A;A	CUCACUAAUUU;ACUCACUAAUU	16;17	31;1	Awan_Short	2	5	3.62702	3.79854	1	3	1.7549	2.18422	GTATGCATTGACATCTGCCGTACATTATAGTTAGGCATTGTACTGCTTTGGCATGAATTCACTCACTAATTTTTGTTTGTTTAG	CACUAAU	CACUAAU	16	31		NA	NA	NA	No	YES	No	NA	No	SPCC1620.07c_intron2	CACUAAU	14	13	YES	No
III	771522	771692	171	-1	SPCC1020.07	SPCC1020.07.1:exon:2-SPCC1020.07.1:exon:1	int_5049	4	4	0	0	0	4	1	1	A	CUAUCUAACGA	10	4	Awan_Short	46	22	4.88837	5.24945	23.5	23	5.09864	4.39046	GTACGTACATAGTAAAATAATATGGATCATTTACGGCGTCCATGATCAACAAATACAATATTTATTATCGTTTATTTGTTTTTCATTCTACTTAAAAGTGCTTAGCCTGATGATTCCTTAAAGCATACTACTTGAAAAGCGATAAAGTGTCCTTCTATCTAACGAATACAG	AUCUAAC	AUCUAAC	10	4		NA	NA	NA	No	YES	No	No	No	SPCC1020.07_intron1	AUCUAAC	8	2	YES	No
II	969872	969963	92	-1	SPBP35G2.04c	SPBP35G2.04c.1:exon:2-SPBP35G2.04c.1:exon:1	int_3565	63	63	0	0	0	42	3	1	A;A;A	CUUACUAACUU;ACUUACUAACU;UUUACUUACUA	10;11;14	55;4;4	Awan_Short	2	3	2.65928	3.2312	3	4	3.88663	3.7698	GTGTGTGTAATTATAAGAATTTCTGTGTTTGTCGCCTGAAGTTTTAAAATTTAAAGTGAATGATTTATGAGTTTACTTACTAACTTTATTAG	UACUAAC	UACUAAC	10	55	UACUUAC	14	4	NA	No	YES	No	NA	No	SPBP35G2.04c_intron1	UACUAAC;UACUUAC	8;12	22;2	YES	No
I	5017060	5017137	78	-1	SPAC890.07c	SPAC890.07c.1:exon:5-SPAC890.07c.1:exon:4	int_2284	101	101	0	0	0	49	2	1	A;A	CUUGCUAACCU;GCUUGCUAACC	9;10	83;18	Awan_Short	121	67	5.69	5.33609	30.5	34	6.7823	6.16206	GTATGCTTACCAGTTATTTAGGATAGATCTCGTTTTTCTTCACTTACATATTTTTTCTTTCGCTTGCTAACCTGTTAG	UGCUAAC	UGCUAAC	9	83		NA	NA	NA	No	YES	No	No	No	SPAC890.07c_intron4	UGCUAAC;UUGCUAA	7;8	43;1	YES	No
II	3686364	3686456	93	1	SPBP8B7.25	SPBP8B7.25.1:exon:1-SPBP8B7.25.1:exon:2	int_3222	37	37	0	0	0	23	4	1	A;A;A;A	AAUACUAAUUU;UUUGCUAAUAC;UAAUACUAAUU;GUUUGCUAAUA	10;16;11;17	28;5;3;1	Awan_Short	122	94	4.56425	3.772	41	31.6667	8.66412	8.68129	GTAAGAATTCATATTGTAGTTGTATATGTTTTATAAAAGTGACTATTTGTTTTCTTTTTCCTTTTTTTTGTTTGCTAATACTAATTTTATCAG	UACUAAU	UACUAAU	10	28	UGCUAAU	16	5	NA	No	YES	No	NA	No	SPBP8B7.25_intron1	UACUAAU	8	7	YES	No
III	1927881	1928038	158	-1	SPCC74.02c	SPCC74.02c.1:exon:2-SPCC74.02c.1:exon:1	int_5249	92	42	50	0	0	33	4	2	A;A;A;A	UCUACUAAUUG;UUCUACUAAUU;UGUAGCGAGUG;GAAUUCUACUA	14;15;85;18	77;10;3;2	Awan_Short;Awan_Long	42	24	9.23347	9.27041	10.75	12.5	5.59102	5.6327	GTATGCAGGCTATTAAAGCGGGGATAGAGAGTTGGTCAATAATTTGAAATATTTGCCTCTACGGGCTGTAGCGAGTGATGTCTTGATTGCTTGTTCTCTCTTTTTTCTCTGCTATTTTTGATCCTTTCTCTTAGAATTCTACTAATTGTTGCCCTTAG	UACUAAU	UACUAAU	14	77	UAGCGAG	85	3	NA	No	YES	No	YES	No	SPCC74.02c_intron1	UACUAAU	12	4	YES	No
I	3722809	3722998	190	1	SPAC15E1.03	SPAC15E1.03.1:exon:1-SPAC15E1.03.1:exon:2	int_778	153	31	122	0	0	62	6	2	A;A;A;A;A;A	UCUACUAACAA;AUCUACUAACA;UUCAUCUACUA;UCCAGAAAAAA;AAUCCAGAAAA;ACCUCUCAAAU	13;14;17;98;100;108	112;29;9;1;1;1	Awan_Short;Awan_Long	59	68	11.8964	11.6766	1.5	2.37931	9.98115	10.0844	GTATGTCGAAGAATGCTGATAACGAGTGGATTGGATTTAGACGAATTTGTAAAAGAGTTTTTGCCGTGGTTGAATACCTCTCAAATCCAGAAAAAAAATTTTGCAAAGCGCTTTTATGAATTGTCTTTTGTTGAGTTTCATCCTTATTATCGATCATTTTCTTTATTTCATCTACTAACAATCATTTTAG	UACUAAC	UACUAAC	13	112	CAUCUAC	17	9	NA	No	YES	No	NA	No	SPAC15E1.03_intron1	UACUAAC	11	5	YES	No
I	1594183	1594271	89	-1	SPAC23H4.08	SPAC23H4.08.1:exon:3-SPAC23H4.08.1:exon:2	int_1496	8	8	0	0	0	6	1	1	A	UUUAUUGACAG	11	8	Awan_Short	23	15	5.12857	5.04955	1.71429	1.6	4.72639	4.84418	GTATGCTACTTCTTGAGCTTTTGTGTTGGAATATTACACAAGGACTAATCATTTGAAAAACACAATTACCTTTTATTGACAGTTTCTAG	GACUAAU	UAUUGAC	11	8		NA	NA	NA	No	No	No	No	No	SPAC23H4.08_intron2	UAUUGAC	9	1	YES	No
I	724419	724505	87	1	SPAPJ696.02	SPAPJ696.02.1:exon:2-SPAPJ696.02.1:exon:3	int_148	71	71	0	0	0	32	2	1	A;A	UUUAUUAACUG;UUUUAUUAACU	15;16	63;8	Awan_Short	48	37	2.51751	2.03171	12.25	38	5.6029	5.5192	GTATGTCAATTTTAAAATTAAGTTTACTTTTTATTATTAAATGACCCATTGCCTTGATAGAAAATTTTATTAACTGTTTTAATTTAG	UUUUAAU	UAUUAAC	15	63		NA	NA	NA	No	No	No	NA	No	SPAPJ696.02_intron2	UAUUAAC	13	19	YES	No
I	3377367	3377518	152	1	SPAC8E11.07c	SPAC8E11.07c.1:exon:2-SPAC8E11.07c.1:exon:3	int_694	20	15	5	0	0	13	3	2	A;A;A	AGUACUGACAU;UCAAAGUACUG;UAAUCAAAGUA	17;21;24	18;1;1	Awan_Short;Awan_Long	92	89	6.05829	6.31419	13.2857	45	6.5764	6.65062	GTATGTTGCATTAGTTGAAACCATATAAACGTTGGACGTGTTGTGCTAGAAGATGTTTCTACCAAGCTGAAGATACTTTTCGGTGGTTTCCGCTTTAGCGTATCTTTTTTAAAATAAAAAATAATCAAAGTACTGACATTCTGGACCTCTAG	UACUGAC	UACUGAC	17	18	AUCAAAG	24	1	NA	No	YES	No	YES	No	SPAC8E11.07c_intron2	UACUGAC	15	5	YES	No
II	209826	209921	96	1	SPBC660.08	SPBC660.08.1:exon:1-SPBC660.08.1:exon:2	int_2379	50	50	0	0	0	30	2	1	A;A	AAUGUUAACAA;GAAUGUUAACA	10;11	43;7	Awan_Short	18	15	5.6485	5.79658	6.33333	8	3.63852	3.70794	GTAAGAGATGCTTAAAGAGATAAGGATATGAGTAAATTTAGTGTTTGAAGTTCGTAATTATCGTTCGCTTTTGAATGTGAATGTTAACAAAATTAG	UGUUAAC	UGUUAAC	10	43		NA	NA	NA	No	YES	No	No	No	SPBC660.08_intron1	UGUUAAC	8	14	YES	No
II	2566968	2567075	108	1	SPBC29A10.12	SPBC29A10.12.1:exon:1-SPBC29A10.12.1:exon:2	int_2914	85	85	0	0	0	43	3	1	A;A;A	UUUACUAACAA;UUUUACUAACA;CCAUAUCAUGU	10;11;58	74;10;1	Awan_Short	153	139	5.06354	5.08234	10.2667	35	7.05176	7.11399	GTAAGAAGCGATAAGGGTACATGCATACTCTTTTTGATGATGACCATATCATGTATAAACCCTAAACAGGAAAACCATTGTAAATATCATTTTTACTAACAATTTCAG	UACUAAC	UACUAAC	10	74	AUAUCAU	58	1	NA	No	YES	No	NA	No	SPBC29A10.12_intron1	UACUAAC	8	29	YES	No
I	775291	775413	123	-1	SPAC4G8.07c	SPAC4G8.07c.1:exon:3-SPAC4G8.07c.1:exon:2	int_1284	73	39	34	0	0	40	2	2	A;A	UUUAUUAACCG;CUUUAUUAACC	9;10	68;5	Awan_Short;Awan_Long	32	21	6.7549	7.12566	11	7.33333	4.8935	5.07284	GTAAGTAAATTTAAAGAATTTTAAACATGCCCAGCTTTTGAACACATACTTTGAATCTAATTCATCTTCCTGAGCATGGAAAAAAAATTCAAGTGTTCCGTTAAACCTTTATTAACCGATTAG	AUCUAAU	UAUUAAC	9	68		NA	NA	NA	No	No	No	NA	No	SPAC4G8.07c_intron2	UAUUAAC	7	9	YES	No
I	5207202	5207302	101	1	SPAC19D5.03	SPAC19D5.03.1:exon:2-SPAC19D5.03.1:exon:3	int_1079	73	73	0	0	0	39	4	1	A;A;A;A	AUAACUAACUA;CAUAACUAACU;GGCUCGCAUAA;CCUUUCCAGUU	11;12;18;29	63;8;1;1	Awan_Short	21	24	5.05712	5.38413	22	25	3.6622	3.65703	GTAAGTATAATTATTCATTAAAAGTTATTCAGTTTAGACAAACTATCTCTGAATATTGTTTTTTTCCTTTCCAGTTGGCTCGCATAACTAACTATCGACAG	AACUAAC	AACUAAC	11	63	CUCGCAU	18	1	NA	No	YES	No	YES	No	SPAC19D5.03_intron2	UAACUAA;AACUAAC	10;9	1;21	YES	No
III	757425	757505	81	1	SPCC1020.11c	SPCC1020.11c.1:exon:1-SPCC1020.11c.1:exon:2	int_4538	6	6	0	0	0	6	2	1	A;A	AGUGCUAAUGA;GAGUGCUAAUG	12;13	4;2	Awan_Short	26	15	6.23531	6.36087	6.75	5.33333	4.47806	4.71215	GTAAGAAATGATTGCAGAGCTAGATTTTCTTGGTACTAGTTTTTTTAAGGATTTTATAATTGAGTGCTAATGAATCCAAAG	UGCUAAU	UGCUAAU	12	4		NA	NA	NA	No	YES	No	NA	No	SPCC1020.11c_intron1	UGCUAAU	10	2	YES	No
II	4380632	4380753	122	1	SPBC1539.10	SPBC1539.10.1:exon:1-SPBC1539.10.1:exon:2	int_3361	99	95	4	0	0	48	6	2	A;A;A;A;A;A	GCUAUUAACAA;UGCUAUUAACA;AAUUGCUAUUA;CUUUCUUAUAG;UGGUCUUAUGU;AAAAUUGAGGA	12;13;16;27;44;75	84;9;2;2;1;1	Awan_Short;Awan_Long	17	18	4.30273	3.78096	9	19	3.4436	3.8171	GTAAGTTAATAAGTATTGCTTTATTTGTTTTATACAAATGAAAATTGAGGAAAAAGTTTTGCGCTCCTTCTTGGTCTTATGTTCTTTTCTTTCTTATAGAATTGCTATTAACAAATAAATAG	UAUUAAC	UAUUAAC	12	84	UUGCUAU	16	2	NA	No	YES	No	NA	No	SPBC1539.10_intron1	GUCUUAU;UUCUUAU;UAUUAAC	42;25;10	1;1;12	YES	No
I	3441796	3441923	128	-1	SPAC3A11.13	SPAC3A11.13.1:exon:4-SPAC3A11.13.1:exon:3	int_1909	74	65	9	0	0	24	2	2	A;A	UUUAUUAAUUC;UUUUAUUAAUU	14;15	63;11	Awan_Short;Awan_Long	54	46	4.69741	5.20646	3.66667	3.91667	5.73163	5.69587	GTATGTTTGTTGAAATTTGAAAAAGAAGAATTTCCTTGAGGTTAAAATCGCTCTCTAAAAATGCGAGTTGTACTTCTTCATTTGTATTATCGAATTGCGTATGTCATTTTATTAATTCATAATTATAG	UAUUAAU	UAUUAAU	14	63		NA	NA	NA	No	YES	No	NA	No	SPAC3A11.13_intron3	UAUUAAU	12	15	YES	No
I	960418	960607	190	1	SPAC222.09	SPAC222.09.1:exon:1-SPAC222.09.1:exon:2	int_209	26	9	17	0	0	18	3	2	A;A;A	GUAACUAACUA;UGUAACUAACU;UGGACUAAUUU	13;14;24	21;4;1	Awan_Short;Awan_Long	16	8	7.51126	7.73225	2.83333	9	5.75942	5.40374	GTATGTGTAGCTGAAGTTTTTCAAGGTTGACTACGGATAAGATCCCGTATGGATAATCGTATGCTCTCTCTGCTTCTGTATCAGCGAGACACTGTATGAGAGAGGTATTTTTTCCTTGTAATACAGTATCATTCTCTTTGAGAAGTCTTTTAACATTATTGGACTAATTTGTAACTAACTAAGCATGTAG	AACUAAC	AACUAAC	13	21	GACUAAU	24	1	NA	No	YES	No	No	No	SPAC222.09_intron1	AACUAAC	11	1	YES	No
I	3693163	3693302	140	1	SPAC15A10.08	SPAC15A10.08.1:exon:2-SPAC15A10.08.1:exon:3	int_762	30	19	11	0	0	23	4	2	A;A;A;A	UAUACUAAAUA;UUAUACUAAAU;GAUUUAUACUA;UUGAUUUAUAC	12;13;16;18	17;10;2;1	Awan_Short;Awan_Long	50	34	5.83116	5.82342	51	35	5.74369	5.52725	GTAAGTAAAGTAAATTAGAAAATTTAAAGGACCTATAGTCAAATATAGATATGTTGTTATTTATGTGCCATTTTATTTTCGAATCTGTTGGATAAACTTGTCTCTCTTTCTTTTGTTGATTTATACTAAATATTTCATAG	UGUUGAU	UACUAAA	12	17	UUUAUAC	16	2	NA	No	No	YES	NA	No	SPAC15A10.08_intron2	UACUAAA	10	2	YES	No
III	1783792	1783974	183	1	SPCC1442.09	SPCC1442.09.1:exon:1-SPCC1442.09.1:exon:2	int_4724	50	25	25	0	0	19	2	2	A;A	GAUACUAAUAC;UGAUACUAAUA	12;13	49;1	Awan_Short;Awan_Long	14	11	8.88215	8.71289	15	6	5.59651	5.52693	GTAATTTGATTTTTTTTGTTCTAACAAGGAGACCCAACCTATGGAAAATAAATAGTAGTATTGGGATATATTGACGAGTTTAGGATTGGGTCTTTCCTTTGTTGTATTGCTTTTAACTGTAAAAGTCGCCGTTTCTAGGGCTATGAAGCTTAAAATTAATACATGATACTAATACTATTTTAG	UACUAAU	UACUAAU	12	49		NA	NA	NA	No	YES	No	No	No	SPCC1442.09_intron1	UACUAAU	10	14	YES	No
III	2025700	2025807	108	1	SPCC1739.01	SPCC1739.01.1:exon:1-SPCC1739.01.1:exon:2	int_4769	17	17	0	0	0	10	2	1	A;A	AUUUCUAACUU;AAUUUCUAACU	12;13	15;2	Awan_Short	14	7	2.20556	1.49738	7.5	8	4.44937	4.05363	GTATGTTTTTCCAAAATTTGTTAACTTAAACTTATGTTATGCGCATATATATATGTATATATGTAACATTTTTTTTTTATTTTTACATAATTTCTAACTTTGATTTAG	UUCUAAC	UUCUAAC	12	15		NA	NA	NA	No	YES	No	NA	No	SPCC1739.01_intron1	UUCUAAC	10	1	YES	No
I	190585	190729	145	1	SPAC13G6.09	SPAC13G6.09.1:exon:1-SPAC13G6.09.1:exon:2	int_9	111	100	11	0	0	36	4	2	A;A;A;A	UGUACUAACUU;UUGUACUAACU;UAACUUUACAU;AACCAGCAUUU	17;18;12;36	95;14;1;1	Awan_Short;Awan_Long	121	74	6.22348	6.4122	40.6667	37.5	6.06544	6.2705	GTAAGTTAAACATTTATTAGTAAATCGTTTTATATTAGACGACTTGATGTCAAAAAAATTATTGGATTTCGGACCTAATATGTTTTTTGAAATCACATTGTAAACCAGCATTTATCTTAATTGTACTAACTTTACATTTACTTAG	UACUAAC	UACUAAC	17	95	ACUUUAC	12	1	NA	YES	YES	No	NA	No	SPAC13G6.09_intron1	UACUAAC	15	24	YES	No
II	2382853	2383027	175	1	SPBC19G7.17	SPBC19G7.17.1:exon:4-SPBC19G7.17.1:exon:5	int_2879	50	48	2	0	0	14	2	2	A;A	UUUGCUAAUUA;UUUUGCUAAUU	12;13	47;3	Awan_Short;Awan_Long	1244	756	9.35577	9.17971	41.5	44.5294	10.6119	10.1851	GTAAGTCATGCTACCGTTGGAGAAGACTTAGAATAGTAAGAGCTACTTAAAGTTTGTTGATTTAAACATACATTTTTTGTTCTCTTTCGCCTCAGATGAGGTTTTAAAATCCCTCCTTCTGAATTTTCCCGATTTAACCTAAATAAACATTTGACTTTTGCTAATTAACTTTCAG	UGCUAAU	UGCUAAU	12	47		NA	NA	NA	No	YES	No	NA	No	SPBC19G7.17_intron4	UGCUAAU	10	13	YES	No
I	356905	356983	79	-1	SPAC630.06c	SPAC630.06c.1:exon:2-SPAC630.06c.1:exon:1	int_1189	86	86	0	0	0	18	2	1	A;A	UUUAUUAAUGU;AUUUAUUAAUG	11;12	85;1	Awan_Short	26	15	1.07171	2.17088	13.5	16	4.37549	4.06463	GTAAGCAATTATTACTTTACATAGACCTTGCGCAACATTACTGTTGCAAATAAATTATTTATTTATTAATGTAATTTAG	UAUUAAU	UAUUAAU	11	85		NA	NA	NA	No	YES	No	NA	No	SPAC630.06c_intron1	UAUUAAU	9	6	YES	No
II	2340850	2340995	146	1	SPBC24C6.13	SPBC24C6.13.1:exon:1-SPBC24C6.13.1:exon:2	int_2863	28	18	10	0	0	13	2	2	A;A	CUCACUAACAU;UCUCACUAACA	20;21	21;7	Awan_Short;Awan_Long	10	8	8.36183	8.671	0.611111	0.473684	5.23236	5.30473	GTATGAATCGCCAAAATTGTAAATGAAATCTGGCTGGTATGAAATGAAACGAGAAATTCCGATTTTGCAATTCTCTTGAATTATTACCTTAAAGATCTCCATTACTTCTTTTTTTCTTTCTCACTAACATTGTTTTTCTGGATTAG	CACUAAC	CACUAAC	20	21		NA	NA	NA	No	YES	No	NA	No	SPBC24C6.13_intron1	CACUAAC	18	18	YES	No
II	493084	493237	154	-1	SPBC902.05c	SPBC902.05c.1:exon:4-SPBC902.05c.1:exon:3	int_3469	276	267	9	0	0	47	4	2	A;A;A;A	UUUACUAAUUC;GUUUACUAAUU;CACGUUUACUA;GCACGAAAAUC	10;11;14;24	246;27;2;1	Awan_Short;Awan_Long	34	35	7.33029	7.16538	2.5	2.76923	6.71497	7.28461	GTATGTCAAGTATAAGAGAAGATGGTTGGATTTGTATGCAGTTTGGCCTTTCTTTTATACGTTTTTGTCAGCAATGCTTGTTCCTGCTTGTCAAGTCCTTCCATGTCTCCTCGAGATTATCGCGCACGAAAATCACGTTTACTAATTCGTTTAG	UACUAAU	UACUAAU	10	246	CGUUUAC	14	2	NA	No	YES	No	No	No	SPBC902.05c_intron3	UACUAAU;CGUUUAC	8;12	140;1	YES	No
I	927382	927488	107	-1	SPAC1687.13c	SPAC1687.13c.1:exon:2-SPAC1687.13c.1:exon:1	int_1320	46	46	0	0	0	31	2	1	A;A	AAUGCUAACAA;UAAUGCUAACA	10;11	40;6	Awan_Short	3	0	5.14181	5.09576	2	1	3.93491	4.1648	GTAAGTTAAGATTTCATTGGTTTTTAGCTATATTATACCAGTCTCTGAATTTTTTTCCCTACGTTAATTTATTAAAATTATAAATCCTGTAATGCTAACAATAACAG	UGCUAAC	UGCUAAC	10	40		NA	NA	NA	No	YES	No	No	No	SPAC1687.13c_intron1	UGCUAAC	8	8	YES	No
II	2461226	2461356	131	-1	SPBC12C2.08	SPBC12C2.08.1:exon:2-SPBC12C2.08.1:exon:1	int_3872	55	41	14	0	0	29	3	2	A;A;A	GUUAUUAACUC;UGUUAUUAACU;UUUAUUAAAAU	17;18;114	51;3;1	Awan_Short;Awan_Long	8	9	3.34206	3.67827	9	10	3.79396	3.26027	GTAAGTACTGTTTATTAAAATTAATTTAGATAAAGAATCAACAGCTAAAAAATTATCAGAGGTGTTTTTTCCTCTGGATAAATTTTTCGTAATTTTGACAGTACATTGTTATTAACTCATTCGTATTTTAG	UAUUAAC	UAUUAAC	17	51	UAUUAAA	114	1	NA	No	YES	No	YES	No	SPBC12C2.08_intron1	UAUUAAC	15	5	YES	No
I	1977450	1977555	106	1	SPAC9G1.05	SPAC9G1.05.1:exon:4-SPAC9G1.05.1:exon:5	int_420	6	6	0	0	0	5	1	1	A	CUUGCUAAUCU	16	6	Awan_Short	173	137	5.27692	5.53929	87	19.7143	7.36762	7.30361	GTAAGTGATTTCTATTGTTTTCGAAGGATGTGTTAAATTATTGGATTTACTCATAATTTCAAAAATTCCAATATTTGTTGACTCTTGCTAATCTTACTTTTAACAG	UGCUAAU	UGCUAAU	16	6		NA	NA	NA	No	YES	No	NA	No	SPAC9G1.05_intron4	UGCUAAU	14	1	YES	No
I	5459174	5459274	101	-1	SPAC1039.05c	SPAC1039.05c.1:exon:2-SPAC1039.05c.1:exon:1	int_2361	26	26	0	0	0	11	1	1	A	ACCGCUAAUUU	14	26	Awan_Short	6	2	4.10959	4.33102	3.5	1.5	3.10285	3.20673	GTATGTGCAATGTGGGATTGGATAGGTAGTAGCAAACATACCTTCTGAAACTTGCTACAATTGACTTTTGTTTCAATAAAACCGCTAATTTCTAATTATAG	UUCUAAU	CGCUAAU	14	26		NA	NA	NA	No	No	No	No	No	SPAC1039.05c_intron1	CGCUAAU	12	11	YES	No
II	3378184	3378346	163	-1	SPBC3B8.08	SPBC3B8.08.1:exon:2-SPBC3B8.08.1:exon:1	int_4116	69	61	8	0	0	30	2	2	A;A	UUUUCUAACAC;UUUUUCUAACA	12;13	64;5	Awan_Short;Awan_Long	15	13	5.92762	5.81842	8	14	3.85491	3.98323	GTAATTAATTTTGTATTTAGTCGTTGTTTAAACTTCAGGTGAATACAATGGCAAACGGAATGATATTAAGGAAGTCAGTTTTCTTTTCTCAAAATGCTTTTGCTACCTTGGTTTTTAAAACAAAACCAATTTTACTATTACCCTTTTTCTAACACTATTCTAG	UUCUAAC	UUCUAAC	12	64		NA	NA	NA	No	YES	No	NA	No	SPBC3B8.08_intron1	UUCUAAC;UUUCUAA	10;11	16;2	YES	No
I	2746240	2746302	63	-1	SPAC6F6.07c	SPAC6F6.07c.1:exon:3-SPAC6F6.07c.1:exon:2	int_1761	3	3	0	0	0	2	1	1	A	UGUGCUGACAG	12	3	Awan_Short	2922	1857	12.3264	12.0423	4.45579	6.11184	11.8438	11.4817	GTATGCCACTTTTACTTAGTTATTAAAGCCTCTGATTGGTTTTGTGTGCTGACAGAGTGATAG	UGCUGAC	UGCUGAC	12	3		NA	NA	NA	No	YES	No	No	No	NA	NA	0	0	No	No
II	4126489	4126568	80	-1	SPBC1861.01c	SPBC1861.01c.1:exon:4-SPBC1861.01c.1:exon:3	int_4289	59	59	0	0	0	29	2	1	A;A	UUGACUAACAU;UUUGACUAACA	12;13	53;6	Awan_Short	163	139	3.80845	3.8048	10.9333	10	5.48347	5.39135	GTAAGTTTAAATATACACATTTCTAAAAATTCAAACAGGAATTATACACCGAGAATGTGTTTTGACTAACATTGCTTTAG	GACUAAC	GACUAAC	12	53		NA	NA	NA	No	YES	No	NA	No	SPBC1861.01c_intron3	GACUAAC;UGACUAA	10;11	15;1	YES	No
III	2406624	2406754	131	1	SPCP1E11.08	SPCP1E11.08.1:exon:2-SPCP1E11.08.1:exon:3	int_4870	134	103	31	0	0	57	3	2	A;A;A	GUUACUAACUC;UGUUACUAACU;GUCUGUUACUA	10;11;14	114;19;1	Awan_Short;Awan_Long	79	64	6.80967	6.94221	20	13	6.06851	6.10026	GTATGTCATGAGTTATTGCTAATAAAAATTTCAGTGAAGTGGTGAAGTTGAGATGTCTGATTTGATTGTTTAAACGTCATGTCGTACATTGATTTAAAAAAGTTTTTAAAGTCTGTTACTAACTCTATCAG	UACUAAC	UACUAAC	10	114	CUGUUAC	14	1	NA	No	YES	No	NA	No	SPCP1E11.08_intron2	UACUAAC	8	33	YES	No
I	5384084	5384206	123	-1	SPAC3G6.03c	SPAC3G6.03c.1:exon:4-SPAC3G6.03c.1:exon:3	int_2351	5	4	1	0	0	5	2	2	A;A	UUUGCUGACUA;UUUUUUAAAUU	11;34	4;1	Awan_Short;Awan_Long	6	7	5.90058	5.54496	1.4	4	3.60681	3.61406	GTATGTTTTTGGCTGTTTTTAGGGTGATGGAAGTGCCTGAACCGTGCGTGCTTTCAAATAATGAATTATAGCATTTTTTGTTTTTTTTAAATTTTTACGCATGACTTTGCTGACTAAGTTTAG	UGCUGAC	UGCUGAC	11	4	UUUUAAA	34	1	NA	No	YES	No	NA	No	SPAC3G6.03c_intron3	UGCUGAC	9	1	YES	No
II	1513236	1513333	98	1	SPBC83.01	SPBC83.01.1:exon:3-SPBC83.01.1:exon:4	int_2685	36	36	0	0	0	24	3	1	A;A;A	AUUACUAACAA;CAUUACUAACA;ACAAGCAACAU	10;11;19	31;4;1	Awan_Short	14	13	3.15309	3.75303	7.5	14	6.3448	6.32057	GTAAGCGATTCAGATAGCAAACTCTCATGTTCAAAGTACATGTGCAGCTTTACTTTTATTTATTCTGATTTTACAAGCAACATTACTAACAATTACAG	UACUAAC	UACUAAC	10	31	AAGCAAC	19	1	NA	No	YES	No	NA	No	SPBC83.01_intron3	UACUAAC	8	9	YES	No
I	4267234	4267320	87	1	SPAC2C4.05	SPAC2C4.05.1:exon:1-SPAC2C4.05.1:exon:2	int_863	24	24	0	0	0	13	2	1	A;A	UAUACUAAUCU;AUAUACUAAUC	18;19	22;2	Awan_Short	68	53	4.142	4.86821	13.8	54	5.23716	4.91653	GTATGTTAAAATAATCACATTCTAACGATATATATTAATGATAAATGTCTCTGATTCGTATATATACTAATCTTTTTCCCTATTTAG	UACUAAU	UACUAAU	18	22		NA	NA	NA	No	YES	No	No	No	SPAC2C4.05_intron1	UACUAAU	16	11	YES	No
I	3207751	3207869	119	1	SPAC1486.08	SPAC1486.08.1:exon:1-SPAC1486.08.1:exon:2	int_670	76	76	0	0	0	43	3	1	A;A;A	UUUAUUAACCA;UUUUAUUAACC;UACAUUCACCA	14;15;33	65;10;1	Awan_Short	87	87	3.87299	3.67937	17.6	22	5.77976	5.84376	GTAAGTAAAGTGCTGATCTTGTTTTACAATATTTAAGTTTTGGCAACCAGCTGCAAAGTGCATTTGCTTTTCGTGAATTTACATTCACCAGTTCCTTTTTTATTAACCACCTGTTATAG	UGCUGAU	UAUUAAC	14	65	CAUUCAC	33	1	NA	No	No	No	NA	No	SPAC1486.08_intron1	UAUUAAC	12	11	YES	No
II	3541392	3541502	111	1	SPBC887.02	SPBC887.02.1:exon:1-SPBC887.02.1:exon:2	int_3194	4	4	0	0	0	4	1	1	A	AUUUCUGACAU	13	4	Awan_Short	2	1	5.72062	6.01243	1	1	4.18894	4.12071	GTACGTAATCCAACCATTTAAATGCATCTGCATGTTGGTAGTGTACGTGATATTTTATTTGACTGTTGATTTACTGTATTCTCTTTATCTGATTTCTGACATTTTTGGAAG	UUCUGAC	UUCUGAC	13	4		NA	NA	NA	No	YES	No	No	No	SPBC887.02_intron1	UUCUGAC	11	2	YES	No
II	4387006	4387190	185	-1	SPBC1289.03c	SPBC1289.03c.1:exon:2-SPBC1289.03c.1:exon:1	int_4348	176	138	38	0	0	63	5	2	A;A;A;A;A	CAGUCUAACAU;ACAGUCUAACA;GGUUUUCAGUU;GACAUACAGUU;AAAUGCCAUCU	12;13;59;90;109	143;30;1;1;1	Awan_Short;Awan_Long	104	89	9.95393	9.96683	105	45	7.47785	7.72217	GTACGTTTTATGATTTTACTTTATTAGAACAGTTTTTGTATACCGGAAACGATGCCTAGTATCGTAAATAAATGCCATCTTTTTATGAGACATACAGTTATCTGTACTCGTGCATCATCGGTTTTCAGTTACTCTTTTTATGCTTAGATCTTTCGTTTAGAAACAACAGTCTAACATATTTTTAG	GUCUAAC	GUCUAAC	12	143	CAUACAG	90	1	NA	No	YES	No	NA	No	SPBC1289.03c_intron1	GUCUAAC;AGUCUAA	10;11	16;1	YES	No
I	3843935	3844014	80	1	SPAC4H3.09	SPAC4H3.09.1:exon:2-SPAC4H3.09.1:exon:3	int_809	39	39	0	0	0	24	2	1	A;A	CGUACUAACUU;ACGUACUAACU	11;12	36;3	Awan_Short	141	89	4.78148	5.61216	28.4	12.8571	6.22253	5.9459	GTATGAACTTTTTTTTCTCCTGAAACGTAGCGTCTAGCCTATATCTTTTCCTACTGCTTCTACGTACTAACTTTATACAG	UACUAAC	UACUAAC	11	36		NA	NA	NA	No	YES	No	No	No	SPAC4H3.09_intron2	UACUAAC	9	8	YES	No
I	3505210	3505310	101	1	SPAC16E8.03	SPAC16E8.03.1:exon:1-SPAC16E8.03.1:exon:2	int_728	12	12	0	0	0	10	2	1	A;A	AUUACUAAUAU;UAUUACUAAUA	8;9	11;1	Awan_Short	36	8	4.00268	4.53265	37	9	4.49863	3.81644	GTATGTCCACACTAATATGAGCTGTCCTGTTTGCAAGGCATTAATCCCTTGACAGACGCAGCATCTTTACCCTGTATTTTTTACCTATTACTAATATTTAG	UACUAAU	UACUAAU	8	11		NA	NA	NA	No	YES	No	NA	No	SPAC16E8.03_intron1	UACUAAU	6	1	YES	No
II	4232201	4232297	97	1	SPBC16G5.10	SPBC16G5.10.1:exon:1-SPBC16G5.10.1:exon:2	int_3325	22	22	0	0	0	19	2	1	A;A	UAUGCUAACAC;GUAUGCUAACA	15;16	17;5	Awan_Short	8	17	5.00439	4.97428	9	9	5.05024	5.40161	GTACGTGAGATATTTGGAGTTCGTATTAACATTGTTTGGCGTAACAAACAATATGAATCAATTGAAAAAAGCTGGTATGCTAACACTTTTTATGTAG	UGCUAAC	UGCUAAC	15	17		NA	NA	NA	No	YES	No	NA	No	SPBC16G5.10_intron1	UGCUAAC	13	4	YES	No
I	1554293	1554380	88	-1	SPAC167.04	SPAC167.04.1:exon:2-SPAC167.04.1:exon:1	int_1482	43	43	0	0	0	22	2	1	A;A	UAUUCUAAUAU;GUAUUCUAAUA	18;19	37;6	Awan_Short	33	20	4.74894	4.98923	4.85714	4.2	5.41988	4.98923	GTACGTTCATTCCCTTAGATAATAGGGGTTATGTTAGCATCTACGGACTATGTTTTCTGAAAGTATTCTAATATATTTAATTTTTTAG	UUCUAAU	UUCUAAU	18	37		NA	NA	NA	No	YES	No	NA	No	SPAC167.04_intron1	UUCUAAU	16	8	YES	No
I	4066492	4066622	131	-1	SPAC19G12.17	SPAC19G12.17.1:exon:5-SPAC19G12.17.1:exon:4	int_2086	16	14	2	0	0	13	3	2	A;A;A	UAGACUGACGU;UUGCAUUAGAC;GCAUUAGACUG	14;20;18	11;4;1	Awan_Short;Awan_Long	19	18	7.8117	7.72927	2.85714	4.75	5.16398	5.37779	GTACGTACGATTTTTGTTTTTCTTTTTTGGTTGGAAATTTCAGTGACGATGAACTATGTTTTCCCAAGTCCCGGATTGAAAACTCAGCTTTACCGTATGAAAACTTGCATTAGACTGACGTTTATGTTTAG	GACUGAC	GACUGAC	14	11	GCAUUAG	20	4	NA	No	YES	No	NA	No	SPAC19G12.17_intron4	GACUGAC	12	2	YES	No
III	584398	584485	88	1	SPCC1672.10	SPCC1672.10.1:exon:2-SPCC1672.10.1:exon:3	int_4488	13	13	0	0	0	9	2	1	A;A	UUUUCUAACUC;GUUUUCUAACU	15;16	12;1	Awan_Short	252	170	6.02458	6.06585	63.25	34.2	7.79222	7.40698	GTACGTTGCTTGCCAAAGTAGTTAGGCTATGATTATACTGGCCTTTACTTCAAACCATCTCATCAGTTTTCTAACTCGATTCTTGAAG	UUCUAAC	UUCUAAC	15	12		NA	NA	NA	No	YES	No	No	No	SPCC1672.10_intron2	UUCUAAC	13	7	YES	No
I	2338280	2338417	138	1	SPAC6C3.08	SPAC6C3.08.1:exon:1-SPAC6C3.08.1:exon:2	int_498	32	23	9	0	0	17	3	2	A;A;A	UUUACUAAUCA;UUUUACUAAUC;GUAACUAAGCU	17;18;48	26;5;1	Awan_Short;Awan_Long	63	35	4.83682	5.03451	64	36	5.06775	4.75428	GTATGTGAAACTAATAATTAATATTGTTATTCTATTGTGAATTCGAAAAAGAAAATGAATATGCATTGACAAGAATAACAAGTGTAACTAAGCTACTAAATGACTCATGTTGTTTTTACTAATCACAAATATTGTTAG	UACUAAU	UACUAAU	17	26	AACUAAG	48	1	NA	No	YES	No	YES	No	SPAC6C3.08_intron1	UACUAAU	15	7	YES	No
I	3519140	3519226	87	-1	SPAC16E8.10c	SPAC16E8.10c.1:exon:2-SPAC16E8.10c.1:exon:1	int_1936	7	7	0	0	0	5	2	1	A;A	UUUGCUAAUAU;AUUUGCUAAUA	12;13	5;2	Awan_Short	16	19	4.95491	4.68379	1.88889	4	5.64833	5.55469	GTACGTCGAAATTATTGAAAATTTTGGAATTTTTTGTGAATTATTTCTTTTTATAGTGTGTAGACGGATTTGCTAATATTTTGATAG	UGCUAAU	UGCUAAU	12	5		NA	NA	NA	No	YES	No	NA	No	NA	NA	0	0	No	No
II	4345100	4345225	126	-1	SPBC16C6.08c	SPBC16C6.08c.1:exon:3-SPBC16C6.08c.1:exon:2	int_4340	111	66	45	0	0	43	3	2	A;A;A	GAUGCUAAUAA;UGAUGCUAAUA;GUGCGUUAUUG	12;13;27	96;11;4	Awan_Short;Awan_Long	367	311	6.62221	6.62076	23	34.6667	8.06354	8.1084	GTAAGTAATTACGCTACTGTTTTTTTTTGGAAAGCCAATGTTCGTATGGTATAACAGTATCTGTTATGAACCGTTTTTGTAGACGTTCTATAGTGCGTTATTGAAGTGATGCTAATAATGTGGTAG	UGCUAAU	UGCUAAU	12	96	GCGUUAU	27	4	NA	No	YES	No	NA	No	SPBC16C6.08c_intron2	UGCUAAU	10	16	YES	No
I	2281240	2281307	68	1	SPAC4G9.14	SPAC4G9.14.1:exon:5-SPAC4G9.14.1:exon:6	int_483	4	4	0	0	0	4	2	1	A;A	UUUGCUAACAU;AUUUGCUAACA	10;11	3;1	Awan_Short	9	10	2.45795	2.74976	2	2.75	3.29302	3.19781	GTAAGGAATCTCTTTGACATTTGCACCAGCTGCCTTAAATTATTATAGTCATTTGCTAACATATTTAG	UGCUAAC	UGCUAAC	10	3		NA	NA	NA	No	YES	No	NA	No	SPAC4G9.14_intron5	UGCUAAC	8	3	YES	No
III	379653	379727	75	-1	SPCC1682.05c	SPCC1682.05c.1:exon:3-SPCC1682.05c.1:exon:2	int_4927	18	18	0	0	0	17	2	1	A;A	AAUACUAAUAG;AAAUACUAAUA	14;15	12;6	Awan_Short	15	11	5.05356	4.19337	5.33333	6	3.90642	3.65075	GTAAGACTTTGCTTTTATTCAGAAGAAATAATTTTTAAAGAGAAAGGAGGGACAAATACTAATAGATTGCTATAG	UACUAAU	UACUAAU	14	12		NA	NA	NA	No	YES	No	No	No	SPCC1682.05c_intron3	UACUAAU	12	3	YES	No
II	1334496	1334606	111	1	SPBC27B12.07	SPBC27B12.07.1:exon:1-SPBC27B12.07.1:exon:2	int_2621	80	80	0	0	0	47	2	1	A;A	AUAGCUAACUU;CAUAGCUAACU	10;11	70;10	Awan_Short	16	10	4.16603	3.68024	8.5	5.5	4.11592	3.76258	GTACGTATGATTTATTAAGCTACAGAATCCTTCCGTCTTTAAATTTATCTTTAATTATAGATTGACGGTTTTTTTTGCTTTCAAATGAACTGTCATAGCTAACTTGTATAG	AGCUAAC	AGCUAAC	10	70		NA	NA	NA	No	YES	No	NA	No	SPBC27B12.07_intron1	AGCUAAC	8	19	YES	No
I	1788093	1788191	99	1	SPAC17A5.16	SPAC17A5.16.1:exon:6-SPAC17A5.16.1:exon:7	int_392	38	38	0	0	0	24	2	1	A;A	UUUGCUAACUA;AUUUGCUAACU	15;16	31;7	Awan_Short	12	4	3.38999	2.35987	13	5	4.47145	4.01195	GTATGTTCAACGGTCCTTTTATATATATTACATTATTTGTACAGTTGTTTAATTTATGTTGTTACGCGTTCATTATATTTGCTAACTAATTTAAAACAG	AACUAAU	UGCUAAC	15	31		NA	NA	NA	No	No	No	NA	No	SPAC17A5.16_intron6	UUGCUAA;UGCUAAC	14;13	1;13	YES	No
II	1235897	1236010	114	-1	SPBC725.17c	SPBC725.17c.1:exon:2-SPBC725.17c.1:exon:1	int_3628	151	151	0	0	0	35	4	1	A;A;A;A	UAUACUAACAU;CUAUACUAACA;AUUCUAUACUA;AUGUCGCAAUU	10;11;14;22	141;7;2;1	Awan_Short	101	86	3.90015	4.19196	12.75	7.25	5.94972	5.79283	GTAAGTGTATACTGGTACAAAACGTCTATACTTTCATCTTTTCGTGTATTGAATTTTTTGTCCCTTCTTATTTGAAATCAATCATATGTCGCAATTCTATACTAACATTTACAG	UACUAAC	UACUAAC	10	141	UCUAUAC	14	2	NA	No	YES	No	NA	No	SPBC725.17c_intron1	UACUAAC;AUACUAA	8;9	88;1	YES	No
I	2396616	2396700	85	-1	SPAC22H10.12c	SPAC22H10.12c.1:exon:2-SPAC22H10.12c.1:exon:1	int_1686	49	49	0	0	0	31	5	1	A;A;A;A;A	GUUACUAACUC;AGUUACUAACU;GUCAGUUACUA;CAUUCUCAGUC;UACCUGGAUAU	11;12;15;23;37	43;2;2;1;1	Awan_Short	143	115	4.89683	5.50584	28.8	58	7.35422	7.312	GTAAGTTAGATGTGGTTAATATTTCACATAACCGTTGTTAATACCTGGATATGGACATTCTCAGTCAGTTACTAACTCCTCTTAG	UACUAAC	UACUAAC	11	43	CAGUUAC	15	2	NA	No	YES	No	NA	No	SPAC22H10.12c_intron1	UACUAAC	9	19	YES	No
I	2123357	2123451	95	1	SPAC20H4.07	SPAC20H4.07.1:exon:1-SPAC20H4.07.1:exon:2	int_441	13	13	0	0	0	12	1	1	A	AUUACUGACAG	10	13	Awan_Short	14	19	6.45668	6.06323	15	10	2.55811	2.28245	GTAAGCGTTTAGTAGTTCAATAAGCTTGCACATAAAAAAAAAATATTGGGTTTTTGTACCGGGATCTTAAAAGACGGAATTACTGACAGCTTTAG	UACUGAC	UACUGAC	10	13		NA	NA	NA	No	YES	No	NA	No	SPAC20H4.07_intron1	UACUGAC	8	1	YES	No
III	2124867	2125014	148	-1	SPCC126.05c	SPCC126.05c.1:exon:3-SPCC126.05c.1:exon:2	int_5290	34	32	2	0	0	22	2	2	A;A	CUUUCUAACAA;CCUUUCUAACA	11;12	28;6	Awan_Short;Awan_Long	5	8	4.5923	4.45785	6	9	5.68271	5.65394	GTAAGTACATTTTTTAAAATTCGATTCCAAGATACACAATATAGTGCAAGAGACTACTTACTATTGATTTGATGCTAAATAATTTATCAAATACTCTTGCAATTTTTGTTTACATAGTCTGCAGATTGGCCTTTCTAACAAACTGTAG	UUCUAAC	UUCUAAC	11	28		NA	NA	NA	No	YES	No	NA	No	SPCC126.05c_intron2	UUCUAAC	9	2	YES	No
II	3301329	3301429	101	1	SPBC20F10.09	SPBC20F10.09.1:exon:1-SPBC20F10.09.1:exon:2	int_3113	13	13	0	0	0	11	2	1	A;A	CAUGCUAACAA;UCAUGCUAACA	8;9	10;3	Awan_Short	36	23	3.41771	3.33102	18.5	24	5.03035	4.81315	GTATGTAGATTTATTAGTACATTCTAAATTAGTTTCATAATAAGAAAAGGGAAAAATTATTGATTTATGCCCTGGGTAAATCTGTTCATGCTAACAAGCAG	UGCUAAC	UGCUAAC	8	10		NA	NA	NA	No	YES	No	NA	No	SPBC20F10.09_intron1	UGCUAAC	6	1	YES	No
I	5353426	5353556	131	-1	SPAC4D7.02c	SPAC4D7.02c.1:exon:2-SPAC4D7.02c.1:exon:1	int_2339	204	96	108	0	0	65	6	2	A;A;A;A;A;A	AUGUUUAACUU;UAUCUGCAACU;AUUUAGCAAAU;UUAACUUAUGU;AAUGUUUAACU;UGAAUGUAUUA	14;65;23;10;15;114	79;56;40;26;2;1	Awan_Short;Awan_Long	2	3	6.61352	6.79878	1	2	2.92379	3.45007	GTATGTTTTATGAATGTATTAGTTGCATACTGCTTTTATTATTAGTAGACTTAGTTTCATATCTGCAACTTTGTACCCTTAATTGTCAAAATCCTTCTCCAATTTAGCAAATGTTTAACTTATGTTTACAG	GUUUAAC	GUUUAAC	14	79	UCUGCAA	65	56	NA	No	YES	No	YES	No	SPAC4D7.02c_intron1	GUUUAAC	12	8	YES	No
III	825136	825242	107	1	SPCC1393.13	SPCC1393.13.1:exon:1-SPCC1393.13.1:exon:2	int_4553	2	2	0	0	0	2	2	1	A;A	AUAACUAACUU;AAUAACUAACU	11;12	1;1	Awan_Short	6	4	6.36194	7.1785	1.75	1.25	2.87299	2.57984	GTATGTAACGGTTTAGCTAGACATATAAACAAACTTGAGGATTCTTAGTTGGATGCTCGAGCATCGTATAGGTAGATTAAAACCGCAAAATAACTAACTTTATACAG	AACUAAC	AACUAAC	11	1		NA	NA	NA	No	YES	No	NA	No	NA	NA	0	0	No	No
II	2522625	2522792	168	-1	SPBC365.14c	SPBC365.14c.1:exon:3-SPBC365.14c.1:exon:2	int_3880	125	82	43	0	0	53	2	2	A;A	UUUGCUAACCA;UUUUGCUAACC	17;18	109;16	Awan_Short;Awan_Long	67	83	8.37656	8.46727	22.6667	42	4.85379	5.32028	GTACGTAGAGAGCTTGAAGATACAGAAGAGGATTAGTAATGTACATGTAAATGTTTTAAGCACGCATCTTTTGTGAATATAGCTTGCTGCTCTTTACTTTTATACAATTTCGTCCATATTCTATAAAGCTCTTTTTTGAGATATTTTGCTAACCACAATCTGCAATAG	UGCUAAC	UGCUAAC	17	109		NA	NA	NA	No	YES	No	NA	No	SPBC365.14c_intron2	UGCUAAC	15	9	YES	No
III	378524	378689	166	1	SPCC1682.04	SPCC1682.04.1:exon:1-SPCC1682.04.1:exon:2	int_4450	29	21	8	0	0	17	2	2	A;A	UUUACUAAUUA;GUUUACUAAUU	11;12	27;2	Awan_Short;Awan_Long	74	90	6.98913	6.68458	1.44231	5.35294	5.70435	5.84685	GTAAGTGTGCACGTCTTGGCATTGATATATTTTATTAGATGGAAATTTAAAATAGGGAAGACACATACAACTGGCTTGAAAATGAGTTTTTTTTTAAATTTCTTTTTCCACTCTTATATGGCTTGTCATTCTTCTTCTGTTGAACGTGTTTACTAATTAGATATAG	UACUAAU	UACUAAU	11	27		NA	NA	NA	No	YES	No	No	No	SPCC1682.04_intron1	UACUAAU	9	1	YES	No
I	4120031	4120125	95	1	SPAC26H5.03	SPAC26H5.03.1:exon:1-SPAC26H5.03.1:exon:2	int_851	4	4	0	0	0	4	1	1	A	UAUACUAAUAU	8	4	Awan_Short	5	14	2.71252	1.9048	6	15	2.53899	3.08234	GTAATGATTTGACATAAAACTATTTTTGCTTCAACTATTGTTTGTTGTAGTTTAAAAAAAAGAAAGAAAATTCCTTCAATTATACTAATATCCAG	UACUAAU	UACUAAU	8	4		NA	NA	NA	No	YES	No	NA	No	SPAC26H5.03_intron1	UACUAAU	6	1	YES	No
I	976464	976576	113	-1	SPAC222.14c	SPAC222.14c.1:exon:2-SPAC222.14c.1:exon:1	int_1342	12	12	0	0	0	9	1	1	A	UUGAUUAACUC	13	12	Awan_Short	41	41	3.19916	3.54756	7	42	6.86808	6.74883	GTAAGTAGATTAAAATCAACTTGAGAGTTCTATATCCAACCAATGTTATAACATCCTTTTAAATTGGATACTTAAAGCTTTCACTGAGCAAATTTGATTAACTCTATGATTAG	GAUUAAC	GAUUAAC	13	12		NA	NA	NA	No	YES	No	NA	No	SPAC222.14c_intron1	GAUUAAC	11	3	YES	No
II	3818374	3818529	156	1	SPBC21C3.13	SPBC21C3.13.1:exon:1-SPBC21C3.13.1:exon:2	int_3258	93	23	70	0	0	29	2	2	A;A	CUUACUAAUAC;ACUUACUAAUA	13;14	90;3	Awan_Short;Awan_Long	2889	2318	10.4942	10.8862	578	463.8	10.3723	10.2345	GTATGTCTATCCTATTTAAAAAAATTAGTTTTGTCGGTGGATATAATACGATATTCGATATACCCATTTGGTTGTTCTCGATGATCGAAAGGGTCGTAGATTATACACCTGAAAACTAACATCTATTATTTGTTAACTTACTAATACAATCTTTAG	UACUAAU	UACUAAU	13	90		NA	NA	NA	No	YES	No	NA	No	SPBC21C3.13_intron1	UACUAAU	11	8	YES	No
I	3474632	3474714	83	-1	SPAC328.01c	SPAC328.01c.1:exon:2-SPAC328.01c.1:exon:1	int_1926	34	34	0	0	0	18	2	1	A;A	UUUGCUAAUUA;AUUUGCUAAUU	14;15	28;6	Awan_Short	33	30	5.50824	5.59604	4.85714	7.75	5.0693	4.84973	GTAAGTCGCGATGAGTCATAATGGAGATAGCCATGGTGCTTTGCGGAAACGGTCCATGAATATTTGCTAATTATCGTTTTTAG	UGCUAAU	UGCUAAU	14	28		NA	NA	NA	No	YES	No	NA	No	SPAC328.01c_intron1	UGCUAAU	12	10	YES	No
I	1376948	1377031	84	1	SPAC57A10.06	SPAC57A10.06.1:exon:1-SPAC57A10.06.1:exon:2	int_318	11	11	0	0	0	8	2	1	A;A	UAAAUUAACUA;AUAAAUUAACU	14;15	9;2	Awan_Short	0	0	-0.0168182	-16.6096	0.333333	1	2.96709	2.89937	GTATGCTAAACGCCCGAATTTTATTTTATCTTATTTTTTAAATAAAAAGCGTAAATAAAGCAATAAATTAACTAGAAAATTTAG	AAUUAAC	AAUUAAC	14	9		NA	NA	NA	No	YES	No	No	No	SPAC57A10.06_intron1	AAUUAAC	12	7	YES	No
I	1776958	1777068	111	1	SPAC17A5.13	SPAC17A5.13.1:exon:2-SPAC17A5.13.1:exon:3	int_384	80	80	0	0	0	45	4	1	A;A;A;A	UAAACUAACAU;CGUAUUAAACU;UUAAACUAACA;GCGUAUUAAAC	12;17;13;18	55;17;5;3	Awan_Short	20	14	4.64716	4.82708	3	7.5	5.80266	5.37671	GTAGGTTTCATTTAGAAGTGGATTTTATCCATTGCATTCACGTGATTGGGCTATGCAATTATGTTTAACCCTCTTTCACAAACTCAGCGTATTAAACTAACATTATTGTAG	AACUAAC	AACUAAC	12	55	UAUUAAA	17	17	NA	No	YES	No	NA	No	SPAC17A5.13_intron2	UAUUAAA;AACUAAC	15;10	3;11	YES	No
I	4113934	4114108	175	-1	SPAC23A1.19c	SPAC23A1.19c.1:exon:2-SPAC23A1.19c.1:exon:1	int_2098	23	5	18	0	0	17	2	2	A;A	UCUACUAACAU;UUCUACUAACA	15;16	18;5	Awan_Short;Awan_Long	27	32	7.07909	7.44491	4	3.66667	4.92603	4.78288	GTAAGTATAGATATACTTTGCATTTTTTGTTGGACGGTGAAGCAATCCCGTATAGATTGGTCGCTTAGTAGTTTGTAAGATAACACTCTCATTTTTTTTATGATCAAATGAAAAGGGATTGCTTGCAAACTTAAATAGATTATTCACATTACTTCTACTAACATATTTCTTTCAG	UACUAAC	UACUAAC	15	18		NA	NA	NA	No	YES	No	NA	No	SPAC23A1.19c_intron1	UACUAAC	13	4	YES	No
II	3003538	3003617	80	-1	SPBC2D10.19c	SPBC2D10.19c.1:exon:3-SPBC2D10.19c.1:exon:2	int_4001	75	75	0	0	0	43	2	1	A;A	GUAUCUAACAA;UGUAUCUAACA	14;15	65;10	Awan_Short	80	70	4.00775	4.15273	40.5	71	4.74623	4.752	GTAAGAAATTTTTTTAATAGTGTGTTTTACAGGAAAGCTTCATTTCCACCGTCAATTATGTATCTAACAAACGGACATAG	AUCUAAC	AUCUAAC	14	65		NA	NA	NA	No	YES	No	No	No	SPBC2D10.19c_intron2	AUCUAAC	12	4	YES	No
II	4120418	4120501	84	-1	SPBC56F2.04	SPBC56F2.04.1:exon:3-SPBC56F2.04.1:exon:2	int_4286	66	66	0	0	0	27	3	1	A;A;A	UAUGCUAACAA;GUAUGCUAACA;AGAUUUAAAGU	12;13;50	58;7;1	Awan_Short	6	3	4.40943	4.52291	1.16667	1.33333	4.15867	4.37032	GTATGTTCACAATTAATTAGCAAAAACAGATTTAAAGTCTGAAGTGCTTTGACTCCATCTATATGTATGCTAACAATCGTTTAG	UGCUAAC	UGCUAAC	12	58	AUUUAAA	50	1	NA	No	YES	No	NA	No	SPBC56F2.04_intron2	UGCUAAC	10	8	YES	No
II	3630092	3630171	80	1	SPBP8B7.32	SPBP8B7.32.1:five_prime_UTR:1-SPBP8B7.32.1:exon:1	int_3213	29	29	0	0	0	24	2	1	A;A	UCGUCUAAUCU;AUCGUCUAAUC	10;11	22;7	Awan_Short	39	28	6.32968	6.48492	5.71429	4.83333	4.83977	4.43597	GTAAGGGTAGTGGATGTTTGCATGCTGATTTGGAAGGGCTGCGGATATCCATGAGAATAAGCATCGTCTAATCTTTATAG	GUCUAAU	GUCUAAU	10	22		NA	NA	NA	No	YES	No	No	No	SPBP8B7.32_intron1	GUCUAAU	8	4	YES	No
I	2348089	2348208	120	1	SPAC17G8.15	SPAC17G8.15.1:exon:1-SPAC17G8.15.1:exon:2	int_503	21	21	0	0	0	15	2	1	A;A	UCAACUAACAG;UUCAACUAACA	14;15	19;2	Awan_Short	3	3	3.51299	3.88969	4	2	2.6206	2.49738	GTATGGAAAGTTATAAATGAAACTAGCTATTTCTCAGTCAGTATCTTTTTGGACGCGCTATTCTAATAAAGATATTCAAATTTTTTATATTGAATGTTTTCAACTAACAGAATTTTCAAG	AACUAAC	AACUAAC	14	19		NA	NA	NA	No	YES	No	NA	No	SPAC17G8.15_intron1	AACUAAC	12	3	YES	No
II	2000086	2000165	80	1	SPBP23A10.02	SPBP23A10.02.1:exon:1-SPBP23A10.02.1:exon:2	int_2778	15	15	0	0	0	7	2	1	A;A	UUCAUUAACAA;AUUCAUUAACA	12;13	13;2	Awan_Short	23	12	2.22348	2.6673	12	13	5.09193	5.21789	GTACGTTTATCCATGAGGAAGTTGAACATCTCGTTCACTTTTTTACGAGTAGTCCAGATCATTCATTAACAACTTTATAG	CAUUAAC	CAUUAAC	12	13		NA	NA	NA	No	YES	No	NA	No	SPBP23A10.02_intron1	CAUUAAC	10	1	YES	No
I	3963610	3963751	142	1	SPAC11G7.02	SPAC11G7.02.1:exon:3-SPAC11G7.02.1:exon:4	int_831	57	57	0	0	0	13	2	1	A;A	GUUUCUAACAA;UGUUUCUAACA	12;13	55;2	Awan_Short	56	38	2.47367	2.32491	19	39	5.67939	5.58542	GTAAGTGTATATCCCAGGTTTTGACCTTTCCAAGTAACTTTTATGTATATCAATTTTAGTTGGGGTTTCTTCCAGTTTATCCCTTATAATTTAGCTAATGTTAACTTTTTGATTAAAAACAATGTTTCTAACAATTCTTTAG	UUCUAAC	UUCUAAC	12	55		NA	NA	NA	No	YES	No	NA	No	SPAC11G7.02_intron3	UUCUAAC	10	42	YES	No
I	3659192	3659270	79	1	SPAC8C9.11	SPAC8C9.11.1:exon:1-SPAC8C9.11.1:exon:2	int_750	3	3	0	0	0	3	2	1	A;A	UUUACUGAUAC;GAUACUUAUAU	12;6	2;1	Awan_Short	112	119	3.15917	3.61145	22.6	20	4.56408	4.60104	GTACGTTGAGCAAAATTTTTATTTTTATTTTTTGGTTTCACATTACTTTAAGCAAACCATTTTACTGATACTTATATAG	UACUGAU	UACUGAU	12	2	UACUUAU	6	1	NA	YES	YES	No	NA	No	SPAC8C9.11_intron1	UACUGAU	10	2	YES	No
II	4305529	4305630	102	1	SPBC543.04	SPBC543.04.1:five_prime_UTR:1-SPBC543.04.1:exon:1	int_3341	7	7	0	0	0	6	3	1	A;A;A	UUUUUAUAACU;CAUUUUUAUAA;UAUAUAAAUUA	12;14;32	4;2;1	Awan_Short	0	0	0.288034	-1.0051	0.5	1	-0.0798274	-0.466081	GTAAGTCCAGCAGCATATGTGCAAATGCACATGTGACTGAAATGTAAATAACCCAAAACATTGTATATAAATTAGTCAATTCATTTTTATAACTTAAATCAG	CUUAAAU	UUUAUAA	12	4	UUUUUAU	14	2	NA	No	No	YES	No	YES	SPBC543.04_intron1	UUUUUAU;UUUAUAA	12;10	1;1	YES	No
I	5367697	5367820	124	1	SPAC4D7.09	SPAC4D7.09.1:exon:1-SPAC4D7.09.1:exon:2	int_1114	51	42	9	0	0	25	2	2	A;A	AAUACUAACCA;AAAUACUAACC	12;13	36;15	Awan_Short;Awan_Long	18	28	5.25418	5.87297	2.11111	3.625	6.06634	6.07482	GTAAAACAAACAAGTGTAGTACTGACTACTTAACGATTTGGATAATGATGACTTCGCACATATTATCTTCATCAACACTTAAAAAAGATAAAATAACAATAAGAAAATACTAACCATGTTTTAG	UACUAAC	UACUAAC	12	36		NA	NA	NA	No	YES	No	No	No	SPAC4D7.09_intron1	UACUAAC	10	6	YES	No
II	1758189	1758301	113	1	SPBC11G11.01	SPBC11G11.01.1:exon:1-SPBC11G11.01.1:exon:2	int_2731	5	5	0	0	0	4	1	1	A	AUUACUAACCC	12	5	Awan_Short	29	34	4.19916	4.23944	30	35	5.82883	5.79516	GTATGTTTATTTTAATAAAACTTAATGAGGTATCACATATGCATGAATGTTGTGTTTATGTTAGAAAGATGCGTTATAAATAATGAAAAGAATCATTACTAACCCGTTTTTAG	UACUAAC	UACUAAC	12	5		NA	NA	NA	No	YES	No	NA	No	NA	NA	0	0	No	No
III	748907	748989	83	1	SPCC14G10.04	SPCC14G10.04.1:exon:1-SPCC14G10.04.1:exon:2	int_4531	45	45	0	0	0	32	3	1	A;A;A	UUGGCUAACGU;AUUGGCUAACG;GUAUGGAAUAU	11;12;21	41;3;1	Awan_Short	109	69	7.7818	7.54492	3.33333	4.11765	6.07303	5.64199	GTAAGTTAGGGATGCTAAATAATCTTGGTTGATGAAAACACCTTCGAGAACCAAAGTATGGAATATTGGCTAACGTTTTACAG	GGCUAAC	GGCUAAC	11	41	AUGGAAU	21	1	NA	No	YES	No	NA	No	SPCC14G10.04_intron1	GGCUAAC	9	5	YES	No
I	1575485	1575672	188	1	SPAC23H4.18c	SPAC23H4.18c.1:exon:1-SPAC23H4.18c.1:exon:2	int_340	40	18	22	0	0	21	1	2	A	AUUGCUUACCU	13	40	Awan_Short;Awan_Long	106	79	7.04006	6.97069	35.6667	80	6.55279	6.20463	GTTCGTCATTATTTTTATGATCATGTTCTTCATGTGTATCAAATTTGCCATAAAGCAAAGTAAACTGTGAAAATTAATACCCAAAGATATATTTGCTATTTTAAAATAAGCATACACTTAAGTACTAGTTTACTCTCTTTGCTTTTTTTATGAGTTCTTCTGATTCATATTGCTTACCTTCAATTTAG	UUCUGAU	UGCUUAC	13	40		NA	NA	NA	No	No	No	NA	No	SPAC23H4.18c_intron1	UGCUUAC	11	8	YES	No
II	230451	230615	165	1	SPBC660.16	SPBC660.16.1:exon:2-SPBC660.16.1:exon:3	int_2389	75	50	25	0	0	40	3	2	A;A;A	UUUAUUAACUU;GUUUAUUAACU;GUUGGGGAUGC	14;15;52	65;9;1	Awan_Short;Awan_Long	0	0	9.0953	9.05419	0.5	0.5	-16.6096	-16.6096	GTATGTGAAAAAGAATATAGATATTTTCCATCTTGGAATTTCGTGTTTCCCTTTTCCTCTCTTTATCTCTTTTTATTTTTTTTTCTTTCGAGAAGAGCCGAGCTGAGTTGGGGATGCTGTTAGGAATTTTTTATAGCGGTCTGGTTTATTAACTTTTTGCCAAAG	UAUUAAC	UAUUAAC	14	65	UGGGGAU	52	1	NA	No	YES	No	YES	No	SPBC660.16_intron2	UAUUAAC	12	16	YES	No
II	3387026	3387113	88	-1	SPBC3B8.05	SPBC3B8.05.1:exon:2-SPBC3B8.05.1:exon:1	int_4118	25	25	0	0	0	17	2	1	A;A	UCAGCUAACCU;GUCAGCUAACC	11;12	23;2	Awan_Short	2	0	2.82295	3.60019	3	1	4.35442	4.31366	GTAAGCTGCTTTTATTAGAGAAAGATGCCGTAAATTAGTTTCTTCTTTTCTCAAAAACATCAAAGCTTGGTCAGCTAACCTTTAATAG	AGCUAAC	AGCUAAC	11	23		NA	NA	NA	No	YES	No	NA	No	SPBC3B8.05_intron1	AGCUAAC	9	6	YES	No
III	684948	685048	101	1	SPCC16C4.22	SPCC16C4.22.1:exon:1-SPCC16C4.22.1:exon:2	int_4517	16	16	0	0	0	12	1	1	A	AAAGCUUACCU	18	16	Awan_Short	2	0	3.17671	2.81644	0.5	0.166667	3.39511	3.62722	GTATGTGTGTTGTTGATAAATCAGCTATCTGGGCGACTTAGCACCATTTTGATTGCATAAAAGAAAAAGAAAAATAAAAGCTTACCTATTTTATGATTTAG	UUUUGAU	AGCUUAC	18	16		NA	NA	NA	No	No	No	NA	No	SPCC16C4.22_intron1	AGCUUAC	16	6	YES	No
II	730926	731025	100	1	SPBC119.08	SPBC119.08.1:exon:1-SPBC119.08.1:exon:2	int_2472	63	63	0	0	0	35	2	1	A;A	AAAACUAACAU;GAAAACUAACA	11;12	54;9	Awan_Short	42	25	8.55021	8.56647	14.3333	6.5	6.4564	6.23739	GTATGAGATATTTGGGTAACTGCTGCATTTGCAAAACATTTTGTTTACTTGACAGAAAATCGCATCTGCTTGAACTTTTAGGAAAACTAACATAGTTTAG	AACUAAC	AACUAAC	11	54		NA	NA	NA	No	YES	No	No	No	SPBC119.08_intron1	AACUAAC	9	17	YES	No
I	2134489	2134573	85	1	SPAC23C11.01	SPAC23C11.01.1:exon:4-SPAC23C11.01.1:exon:5	int_456	18	18	0	0	0	8	1	1	A	AAUUUUAACAU	14	18	Awan_Short	4	5	2.9661	3.34537	5	6	3.14027	3.16905	GTAAGTTCCAACATGTTTTACTTATTCACTATTACCAATTTCTTGCTTTTTTTTCGAGCAGTCGAATTTTAACATTTTTTAACAG	UUUUAAC	UUUUAAC	14	18		NA	NA	NA	No	YES	No	NA	No	SPAC23C11.01_intron4	UUUUAAC	12	13	YES	No
II	1911141	1911218	78	1	SPBP16F5.07	SPBP16F5.07.1:exon:3-SPBP16F5.07.1:exon:4	int_2767	93	93	0	0	0	40	4	1	A;A;A;A	AAUAUUAAUUU;UUUUCUAAUAU;GUUUUCUAAUA;UAAUAUUAAUU	12;18;19;13	65;20;5;3	Awan_Short	7	4	3.94806	4.18925	8	1.66667	6.19551	5.9767	GTAAGTTATTAGTTTGTGCCTGTTCTTTTTATTCCCTCTCTCCTTTATCAACGTTTTCTAATATTAATTTCTCGTTAG	UUCUAAU	UAUUAAU	12	65	UUCUAAU	18	20	NA	No	No	No	NA	No	SPBP16F5.07_intron3	UUCUAAU;UAUUAAU	16;10	8;23	YES	No
I	3537789	3537984	196	1	SPAC1B1.01	SPAC1B1.01.1:exon:1-SPAC1B1.01.1:exon:2	int_734	14	3	11	0	0	9	3	2	A;A;A	UCAGUUAACCU;AUCAGUUAACC;UUUCAUCAGUU	8;9;13	11;2;1	Awan_Short;Awan_Long	2	4	6.24459	6.18187	1.5	2.5	5.61684	5.59348	GTATGTTTTTTATTATTAATTCGCTCCATCTTGTATAGTTTGATAGATCTTTGTTGGATATAAACAAAAAAAGACTTGGTCTTGTTAAAGTTGCTTTGCTTCCAATTATTCGTTTTACGGTTGAATTGGTGTATCCTTCACTCATCTATCAGTTTGTTCATACGTAATTCTTCTTTTTTCATCAGTTAACCTTTAG	AGUUAAC	AGUUAAC	8	11	UCAUCAG	13	1	NA	No	YES	No	YES	No	NA	NA	0	0	No	No
II	1510731	1510880	150	1	SPBC83.01	SPBC83.01.1:exon:1-SPBC83.01.1:exon:2	int_2683	2	0	2	0	0	2	2	1	A;A	AUAUCUAACUG;GAAUGUUAUAA	16;61	1;1	Awan_Long	12	5	5.57293	5.81352	6.5	6	5.69688	5.37245	GTATGTTTAATTCATTCCTCAATCAAAAGCTTTGGGATAGCAGTTTTTATCTCTTAAAGTTTAGAGTTTAAATCTAAGAGTGGAATGTTATAAATTAAAGCGTTGCACTTTCTAAAAGAAAAAATATATATCTAACTGCCAATTTATTAG	AUCUAAC	AUCUAAC	16	1	AUGUUAU	61	1	NA	No	YES	No	No	No	NA	NA	0	0	No	No
III	1974979	1975120	142	1	SPCC18.10	SPCC18.10.1:exon:2-SPCC18.10.1:exon:3	int_4751	92	37	55	0	0	32	2	2	A;A	UCACCUAACCG;UUCACCUAACC	13;14	83;9	Awan_Short;Awan_Long	17	15	6.652	6.52318	3.6	4	5.30774	5.30851	GTAAGTAAAAAGATTTCCATCGAGCCAAGCGTTGAAAAGTTATTCTAAATCTGACAAAAAAAACATTGCAAAAACTTTTTGGGCAAAGAATTTGCGATATACGCTTTTAAAAATTCTGAATTTCACCTAACCGAATGAACAG	ACCUAAC	ACCUAAC	13	83		NA	NA	NA	No	YES	No	NA	No	SPCC18.10_intron2	ACCUAAC	11	19	YES	No
II	3111601	3111696	96	-1	SPBC1778.08c	SPBC1778.08c.1:exon:4-SPBC1778.08c.1:exon:3	int_4025	7	7	0	0	0	5	2	1	A;A	UUUGCUAACUA;AUUUGCUAACU	14;15	6;1	Awan_Short	147	137	2.69741	3.47465	148	34.5	6.16136	6.35364	GTAAGATTCACCCAAACTGTGGCATTAGACATATAGATGTTTGTGCCGCTAATAGCTTTCTTGCTTTTTTTTTCATTTGCTAACTATTAAAAAAAG	UGCUAAC	UGCUAAC	14	6		NA	NA	NA	No	YES	No	NA	No	SPBC1778.08c_intron3	UGCUAAC	12	5	YES	No
I	3709347	3709498	152	-1	SPAC15A10.12c	SPAC15A10.12c.1:exon:2-SPAC15A10.12c.1:exon:1	int_1985	84	71	13	0	0	46	2	2	A;A	CAUUCUAACCA;GCAUUCUAACC	14;15	62;22	Awan_Short;Awan_Long	2	0	5.30747	5.65778	1	0.333333	4.11871	4.13242	GTATGCAAGATAGCCAGACCACTCTTGATAAAACTGTCAATATTTTGAAGACTTATTGAATAAGTTATGACAAATTTCTGATAATAAAAACTGAGTGTTCTTCTTGCTTTTATTAATAATATCGATCAAGGCATTCTAACCATTGCTGCTAG	UUCUAAC	UUCUAAC	14	62		NA	NA	NA	No	YES	No	No	No	SPAC15A10.12c_intron1	UUCUAAC;AUUCUAA	12;13	10;2	YES	No
III	1541662	1541788	127	-1	SPCC1753.01c	SPCC1753.01c.1:exon:2-SPCC1753.01c.1:exon:1	int_5163	48	44	4	0	0	21	4	2	A;A;A;A	AAUACUAAUUU;UAAUACUAAUU;AUAUCUAAUAC;UAAAACUAUUG	17;18;23;102	42;4;1;1	Awan_Short;Awan_Long	93	80	5.18122	5.24847	6.26667	11.5714	5.95442	5.78831	GTAAGTGGGATAAAATACTAAAACTATTGTTTGAATAACCGCAAGGTGATACTTTTTGGTTGATAGTTTTGTACTAGCACTGACCTTATTCATAAAAATATCTAATACTAATTTTTCCAATGTTTAG	UACUAAU	UACUAAU	17	42	AUCUAAU	23	1	NA	No	YES	No	No	No	SPCC1753.01c_intron1	UACUAAU;AUACUAA;AUCUAAU	15;16;21	20;1;1	YES	No
II	2239249	2239361	113	1	SPBC15C4.02	SPBC15C4.02.1:exon:1-SPBC15C4.02.1:exon:2	int_2823	36	36	0	0	0	16	1	1	A	UUUUCUAAUGU	16	36	Awan_Short	16	20	5.37548	6.03694	8.5	21	4.34032	4.28659	GTAAGTTAGATTGACTTCGATGAGGTTTTGACACCTTTTATCCCTGCTCTGGATATTCTACGATGATTCTCATAAATTATATTCCTTTCATTTTCTAATGTATAATTATTTAG	UUCUAAU	UUCUAAU	16	36		NA	NA	NA	No	YES	No	NA	No	SPBC15C4.02_intron1	UUCUAAU	14	10	YES	No
II	231565	231736	172	1	SPBC660.16	SPBC660.16.1:exon:4-SPBC660.16.1:exon:5	int_2391	16	10	6	0	0	12	1	2	A	UUGGCUAACGG	18	16	Awan_Short;Awan_Long	89	91	6.96045	6.90637	30	46	6.50719	6.74976	GTAATGATATTGATTGATATATTGAAGGGAAATATCGTATGCTATCCTGACAATTTGTATTGCCTTTTGCAGTACATTCTTGTTGCGGAAAGTTCAATACTATTTTTTTCTTCATGGTTATCTTTCTTTCTTTTGAAATCTTTTTATTTGGCTAACGGTTCTTTTTCTTCAG	GGCUAAC	GGCUAAC	18	16		NA	NA	NA	No	YES	No	NA	No	SPBC660.16_intron4	GGCUAAC	16	1	YES	No
I	4166969	4167076	108	1	SPAC25B8.20	SPAC25B8.20.1:exon:1-SPAC25B8.20.1:exon:2	int_857	11	11	0	0	0	7	2	1	A;A	AAAGCUGACGG;UGAAUAAAGCU	16;21	10;1	Awan_Short	15	14	4.42795	4.95681	16	15	4.34264	4.21942	GTAAGTAACGGGTACATTGAAGATTGCACTTATTTTTTAAGATGAAGAATAAAGGAGGGAAGACAGGTTTTGATTAAGAATGAATAAAGCTGACGGTAAAATTATCAG	AGCUGAC	AGCUGAC	16	10	AAUAAAG	21	1	NA	No	YES	No	NA	No	NA	NA	0	0	No	No
II	2393703	2393793	91	1	SPBC36B7.07	SPBC36B7.07.1:exon:1-SPBC36B7.07.1:exon:2	int_2883	4	4	0	0	0	4	1	1	A	UUAACUGACAU	19	4	Awan_Short	20	10	3.18962	4.36896	7	2.2	3.4426	2.91884	GTAAGTTGTGCAATGATGAACCAGAAATGTCTTAATAGATTCCTTTTGTTGCTTTAAGATTTTATTTAACTGACATTTATTCGAAATATAG	AACUGAC	AACUGAC	19	4		NA	NA	NA	No	YES	No	NA	No	SPBC36B7.07_intron1	AACUGAC	17	2	YES	No
II	3004673	3004782	110	1	SPBC2D10.20	SPBC2D10.20.1:exon:3-SPBC2D10.20.1:exon:4	int_3018	27	27	0	0	0	18	2	1	A;A	GGUCCUAACAU;UGGUCCUAACA	9;10	23;4	Awan_Short	6	6	6.91605	6.7563	0.636364	0.875	3.37549	3.6673	GTACGCATCCTACGTAGGTCGTCAAATTAAGAGCTATCACTTGTGAAAAATTTACCGTTGCATCGTTTAAAACCATATTATTATTTAGTTATTTGGTCCTAACATTTTAG	UCCUAAC	UCCUAAC	9	23		NA	NA	NA	No	YES	No	NA	No	SPBC2D10.20_intron3	GUCCUAA;UCCUAAC	8;7	2;15	YES	No
II	535459	535631	173	1	SPBC649.02	SPBC649.02.1:exon:1-SPBC649.02.1:exon:2	int_2442	74	37	37	0	0	40	3	2	A;A;A	GUUUCUAACUG;AGUUUCUAACU;AUAAAGCAAGU	12;13;21	62;11;1	Awan_Short;Awan_Long	286	217	10.26	10.2386	17.9375	18.1667	8.1245	8.17253	GTAGGTAGAAGATTGAGCTGTTAATGGGAACTTTTGGTTGTAGAAGGTTTTCATCTGTCTGATCACAGAATAAGATTGTTTAGCATACGTGTGAAATTGACAGTGAACTTGTAGCTTATTAACATTTACTCACTCATTTCTTTCTATAAAGCAAGTTTCTAACTGATCCGTAG	AACUGAU	UUCUAAC	12	62	AAAGCAA	21	1	NA	No	No	No	YES	No	SPBC649.02_intron1	UUCUAAC	10	3	YES	No
II	3850188	3850323	136	1	SPBC23E6.05	SPBC23E6.05.1:exon:1-SPBC23E6.05.1:exon:2	int_3261	53	50	3	0	0	27	3	2	A;A;A	GUGACUAACAG;AGUGACUAACA;UUUAGUGACUA	11;12;15	47;4;2	Awan_Short;Awan_Long	46	41	4.2653	4.43782	23.5	21	5.93142	5.75645	GTAAGTAATTGTTCATTTTTTCTTTTAAGCGTGTTCATCTTTTGATGACAATCTTTTTTGCAACTTGCTTCCAAAATTTATTCCGATAATTGTTCTTTCCATTATTTAATATATTTTAGTGACTAACAGAGATCAG	GACUAAC	GACUAAC	11	47	UAGUGAC	15	2	NA	No	YES	No	NA	No	SPBC23E6.05_intron1	GACUAAC	9	3	YES	No
I	1135062	1135194	133	-1	SPAC56F8.05c	SPAC56F8.05c.1:exon:5-SPAC56F8.05c.1:exon:4	int_1378	17	9	8	0	0	10	2	2	A;A	UUUCCUAACCU;UUUUCCUAACC	12;13	16;1	Awan_Short;Awan_Long	184	128	6.2802	6.51288	46.25	32.25	6.92864	6.70719	GTAAGTCAAAATTTTTTTTGGTTTTAATTGCCTTGTTGTTATTTTTATTAGGAAAAATTTTGTTTGCAATTTGTTCAGGCATACCAAAAAAAGATGTAGACTGTTTTTTATGCTTTTCCTAACCTGTACGCAG	UCCUAAC	UCCUAAC	12	16		NA	NA	NA	No	YES	No	NA	No	SPAC56F8.05c_intron4	UCCUAAC	10	9	YES	No
I	1764793	1764876	84	-1	SPAC17A5.07c	SPAC17A5.07c.1:exon:7-SPAC17A5.07c.1:exon:6	int_1550	7	7	0	0	0	7	2	1	A;A	GUUUACUAAGU;UUUACUAAGUU	13;12	4;3	Awan_Short	9	4	0.983174	2.08234	10	2.5	2.45795	1.57984	GTATGTTAAAGGTTTACAATTTTATTGATTAAAAGGAAAAATATATCATAAATCATTTGATTCAGTTTACTAAGTTAATTATAG	AGUUAAU	UACUAAG	12	3		NA	NA	NA	No	No	YES	No	No	SPAC17A5.07c_intron6	UACUAAG	10	1	YES	No
III	592254	592352	99	1	SPCC1183.01	SPCC1183.01.1:exon:3-SPCC1183.01.1:exon:4	int_4491	26	26	0	0	0	24	3	1	A;A;A	AAAACUAACAA;GAAAACUAACA;UUGAAGAAAUU	13;14;59	23;2;1	Awan_Short	42	20	1.55349	1.8453	43	10.5	5.55606	4.88969	GTGAGCAATTATATTAAGCGTGGCTCTTTCAACTTGAAGAAATTGAGCTTGATTAAATTCTTGAATTTTGATTACGCAGAAAACTAACAATTGTATCAG	AACUAAC	AACUAAC	13	23	GAAGAAA	59	1	NA	No	YES	No	YES	No	SPCC1183.01_intron3	AACUAAC	11	5	YES	No
II	3118036	3118218	183	1	SPBC4C3.10c	SPBC4C3.10c.1:exon:3-SPBC4C3.10c.1:exon:4	int_3046	13	10	3	0	0	10	2	2	A;A	UUAUCUAACGA;CCUUUAGAAUA	12;117	12;1	Awan_Short;Awan_Long	42	48	8.99293	9.10579	7.16667	3.76923	5.89763	6.21935	GTAAGTTACCCTTGAATGAACCGAATGACTGTAAATTAAGGCTGCTTTAGCTGGTTTATCCTTTAGAATAAACTATCGACTTACTCTCAAGTCCTTATGTTTACTAGATGATTACTAAAGCCTTTTTGCATGTTTTATTTTTCATTTTATTGTTGTTAAAAAAATTATCTAACGATTATGAAG	AUCUAAC	AUCUAAC	12	12	UUUAGAA	117	1	NA	No	YES	No	NA	No	SPBC4C3.10c_intron3	AUCUAAC	10	6	YES	No
I	2693107	2693185	79	-1	SPAC644.11c	SPAC644.11c.1:exon:3-SPAC644.11c.1:exon:2	int_1751	15	15	0	0	0	11	2	1	A;A	AAAGCUAACUG;CAAAGCUAACU	11;12	14;1	Awan_Short	53	48	4.79962	4.82295	18	9.8	5.60649	5.62344	GTAGGTCAAATGTGTATATTTGCATGTTCGATACTTGTCGAAACATAACCAGAAATCAAACAAAGCTAACTGGTTGAAG	AGCUAAC	AGCUAAC	11	14		NA	NA	NA	No	YES	No	NA	No	SPAC644.11c_intron2	AGCUAAC	9	1	YES	No
III	1001625	1001712	88	-1	SPCC895.04c	SPCC895.04c.1:exon:3-SPCC895.04c.1:exon:2	int_5086	102	102	0	0	0	27	2	1	A;A	CUUGCUAAUUG;GCUUGCUAAUU	13;14	92;10	Awan_Short	67	61	4.77403	4.82258	5.23077	7.75	5.13156	5.09192	GTAAGCTTAAAATTTTAATACTGGTAAAATTATGTTTACTTAAATTATAAACAAAACACAGGGACATGCTTGCTAATTGCATGAGTAG	UGCUAAU	UGCUAAU	13	92		NA	NA	NA	No	YES	No	NA	No	SPCC895.04c_intron2	UGCUAAU	11	34	YES	No
III	740882	740972	91	-1	SPCC18B5.11c	SPCC18B5.11c.1:exon:2-SPCC18B5.11c.1:exon:1	int_5045	52	52	0	0	0	33	2	1	A;A	UUAUCUAACGA;AUUAUCUAACG	14;15	40;12	Awan_Short	9	4	7.40685	7.76683	3.33333	2.5	5.78187	5.89068	GTATATAAAATAATAGTGGCCAGCTGAACTCGTTTAGTTTTAATTGAACTTCAATCTCTTTAAGACATAATTATCTAACGAAATGACCCAG	AUCUAAC	AUCUAAC	14	40		NA	NA	NA	No	YES	No	No	No	SPCC18B5.11c_intron1	AUCUAAC	12	21	YES	No
I	1700960	1701097	138	-1	SPAC824.09c	SPAC824.09c.1:exon:5-SPAC824.09c.1:exon:4	int_1521	19	8	11	0	0	11	1	2	A	UUUUCUGACCU	12	19	Awan_Short;Awan_Long	39	37	6.02851	5.89862	13.3333	12.6667	6.90077	6.39062	GTAGGTTTTTATTGATAATCCTTAGCATAGCTGGCATTGAATGTTATCTTTCTAGGCTACATACCCTTTACACGTTGCTAGCAAATTGGAAGCTTCTTTTTTGTTTTTTTTACTGCATATTTTCTGACCTAGATTTAG	UUCUGAC	UUCUGAC	12	19		NA	NA	NA	No	YES	No	NA	No	SPAC824.09c_intron4	UUCUGAC	10	1	YES	No
III	491283	491427	145	-1	SPCC970.09	SPCC970.09.1:exon:8-SPCC970.09.1:exon:7	int_4951	9	9	0	0	0	7	2	1	A;A	UCAUCUAACUU;UUCAUCUAACU	14;15	6;3	Awan_Short	80	48	2.95046	3.07235	27	6.125	5.4843	5.21863	GTAAGTTGACAGATCTTTTTGTAACTCCAAATCGTTAAGGTCTACGAGCCGGATTTTGTTTGCAGCTTCACGGGTAGCCACCGCTTTTTTCTTTTCCAATACCATTGTCTCTAAATTCGCAAGTTCATCTAACTTGTCTTTGTAG	AUCUAAC	AUCUAAC	14	6		NA	NA	NA	No	YES	No	NA	No	SPCC970.09_intron8	AUCUAAC;CAUCUAA	12;13	3;1	YES	No
I	515083	515221	139	-1	SPAC227.11c	SPAC227.11c.1:exon:3-SPAC227.11c.1:exon:2	int_1228	20	16	4	0	0	17	3	2	A;A;A	CAAGCUAAUCA;UCAAGCUAAUC;UACUUUUAGUA	13;14;38	11;7;2	Awan_Short;Awan_Long	29	15	3.64886	3.35571	3	2.28571	1.18273	0.474544	GTACGAGTTCTAATTGTTTTATTTGTCTTAAACAAACCAACTTTACTAAAAGGTCATTATTTGACATGTCCATAAAAATTTTAGAATTAATGACTACTTTTAGTACATGTAGTGTTTTTCAAGCTAATCATTGTATTAG	AGCUAAU	AGCUAAU	13	11	CUUUUAG	38	2	NA	No	YES	No	YES	No	SPAC227.11c_intron2	AGCUAAU	11	3	YES	No
III	1917223	1917344	122	-1	SPCC737.09c	SPCC737.09c.1:exon:2-SPCC737.09c.1:exon:1	int_5246	23	21	2	0	0	10	2	2	A;A	AUUGCUAAUUU;UAUUGCUAAUU	13;14	20;3	Awan_Short;Awan_Long	61	43	3.87101	3.90649	62	44	5.11483	4.84295	GTACGTATTTCAAGCATTTTTCTTAAAAAATATATATATATATATATATAAGTATATTTTGAAAGAAAAATGTTTATGTTTAATTGTTTAACCTCGCTTCATATTGCTAATTTCATTTTTAG	UGCUAAU	UGCUAAU	13	20		NA	NA	NA	No	YES	No	NA	No	SPCC737.09c_intron1	UGCUAAU	11	1	YES	No
II	2419432	2419532	101	-1	SPBC1921.07c	SPBC1921.07c.1:exon:2-SPBC1921.07c.1:exon:1	int_3867	34	34	0	0	0	23	2	1	A;A	UAUAUUAACAA;GUAUAUUAACA	12;13	32;2	Awan_Short	67	53	4.36113	4.43535	11.3333	13.5	5.54144	5.43203	GTGAGTTTTCAAAAGCAAATATTGTCAGTCGCGAGTTCAAATTTACTTCTAAGCTTATATGTTGATAATATTTTTTTACCAGTATATTAACAAAACCATAG	UAUUAAC	UAUUAAC	12	32		NA	NA	NA	No	YES	No	NA	No	SPBC1921.07c_intron1	UAUUAAC	10	4	YES	No
I	4733600	4733719	120	-1	SPAC458.02c	SPAC458.02c.1:exon:2-SPAC458.02c.1:exon:1	int_2201	48	48	0	0	0	20	4	1	A;A;A;A	UUAACUAAUCA;CAUCUUAACUA;CUUAACUAAUC;GCAUCUUAACU	9;13;10;14	29;17;1;1	Awan_Short	162	114	3.89486	3.76041	32.6	57.5	6.92406	6.92132	GTAAGTAGTTTTAAATTCTTGAATATTGAAGGCTAAGCTTTTTTTTTTTTTCATAACTATGAAAGCTTCAAAAAATCACTTGTTTCTTATATAGTTTTCGCATCTTAACTAATCAACTAG	AACUAAU	AACUAAU	9	29	UCUUAAC	13	17	NA	No	YES	No	NA	No	SPAC458.02c_intron1	AACUAAU;UCUUAAC	7;11	7;1	YES	No
III	1026575	1026701	127	1	SPCC825.02	SPCC825.02.1:exon:4-SPCC825.02.1:exon:5	int_4590	32	16	16	0	0	18	2	2	A;A	UUAACUGACUU;AACUUUAACUG	14;18	31;1	Awan_Short;Awan_Long	183	93	5.39803	5.47303	184	94	6.98584	6.75256	GTATGGGAAACATAATTATTGTATTATTTAGTCACAGAAAAAGTAGAAAATTTGATTTTTTCCTTTTTCTTTTTATTATTTAGCTGCGTGGTCAAATGTTTCAACTTTAACTGACTTTGAGAATTAG	AACUGAC	AACUGAC	14	31	CUUUAAC	18	1	NA	No	YES	No	NA	No	SPCC825.02_intron4	AACUGAC	12	9	YES	No
II	850709	850798	90	-1	SPBC36.05c	SPBC36.05c.1:exon:7-SPBC36.05c.1:exon:6	int_3535	52	52	0	0	0	25	2	1	A;A	UUAACUAACAU;UUUAACUAACA	12;13	46;6	Awan_Short	39	22	8.03084	7.77536	40	23	5.33817	5.34537	GTAAGATAAAAGTTTTTCCCAAAAAAGGGGCTTTGAAGCATCCGCTGAATTTGTGAATGGAGTATAGGACTTTAACTAACATTGGTTTAG	AACUAAC	AACUAAC	12	46		NA	NA	NA	No	YES	No	NA	No	SPBC36.05c_intron6	AACUAAC	10	20	YES	No
II	1055981	1056054	74	1	SPBC337.14	SPBC337.14.1:exon:3-SPBC337.14.1:exon:4	int_2539	5	5	0	0	0	5	2	1	A;A	UUGACUAACCU;UUUGACUAACC	9;10	3;2	Awan_Short	95	104	6.13182	6.49127	6	7	6.40297	6.59135	GTACATAATTTCAAAGAATTGAATAGAATTTTAGAGGAAAATAGCCGTATGCAAATATTTGACTAACCTCATAG	GACUAAC	GACUAAC	9	3		NA	NA	NA	No	YES	No	NA	No	SPBC337.14_intron3	GACUAAC	7	1	YES	No
I	5361332	5361502	171	-1	SPAC4D7.06c	SPAC4D7.06c.1:exon:2-SPAC4D7.06c.1:exon:1	int_2343	43	37	6	0	0	20	2	2	A;A	UAGGCUAAUCU;UUAGGCUAAUC	13;14	39;4	Awan_Short;Awan_Long	21	15	2.95763	2.8933	22	16	3.33986	3.55768	GTAAGTCAAGCATCTTTATGAAGTTACAAGGCTCTATAAATCATTTTCAGCTTTTTAGTATCTTAACTTTCATCTACACAGAATTGAAAAATTAGCAAAGCATACAAAATGAAAGCTAGCAAAGTTTTTTGATGTATCTCAAGGTAATTTTTAGGCTAATCTAAGCTTTAG	GGCUAAU	GGCUAAU	13	39		NA	NA	NA	No	YES	No	No	No	SPAC4D7.06c_intron1	GGCUAAU	11	15	YES	No
I	3666037	3666133	97	1	SPAC8C9.14	SPAC8C9.14.1:exon:1-SPAC8C9.14.1:exon:2	int_754	63	63	0	0	0	17	3	1	A;A;A	CAUACUAACGU;UCAUACUAACG;UUUUCUCAUAC	15;16;21	51;11;1	Awan_Short	17	19	4.0235	4.65235	9	10	4.11014	3.94944	GTATGTTGGTTCCTTTTTCCGATGAATTTTTTATAATTATAAAATTTCACGTTTCGTGATAAAACTATGTTTTCTCATACTAACGTTGTTGAATTAG	UACUAAC	UACUAAC	15	51	UUCUCAU	21	1	NA	No	YES	No	NA	No	SPAC8C9.14_intron1	AUACUAA;UACUAAC	14;13	2;54	YES	No
I	3689639	3689721	83	1	SPAC15A10.06	SPAC15A10.06.1:exon:2-SPAC15A10.06.1:exon:3	int_759	90	90	0	0	0	34	2	1	A;A	UUUUCUAACCA;CUUUUCUAACC	10;11	59;31	Awan_Short	6	5	4.67287	4.15024	7	6	3.29597	3.33624	GTATATAGTTTTGAGTGAAATGCTATACTAAAGTCTCCATTTCTTTCCTTTATCTTTTTGTTATACTTTTCTAACCAATATAG	UUCUAAC	UUCUAAC	10	59		NA	NA	NA	No	YES	No	NA	No	SPAC15A10.06_intron2	UUCUAAC	8	6	YES	No
I	3527494	3527594	101	-1	SPAC16E8.14c	SPAC16E8.14c.1:exon:4-SPAC16E8.14c.1:exon:3	int_1946	11	11	0	0	0	10	2	1	A;A	AAUUUUAACAA;AAAUUUUAACA	10;11	8;3	Awan_Short	26	16	3.24084	3.09655	6.75	3.4	5.39894	5.05849	GTATGTATATCAGTTAGATGCTTTTATTTTGTCCAAGATGAGGCTTAATCTCTAGGATCCACTTCTTTGCTTGTCATCTTAACAAATTTTAACAAATTTAG	UUUUAAC	UUUUAAC	10	8		NA	NA	NA	No	YES	No	No	No	NA	NA	0	0	No	No
I	3110324	3110507	184	1	SPAC589.12	SPAC589.12.1:exon:1-SPAC589.12.1:exon:2	int_649	5	3	2	0	0	5	2	2	A;A	UUUACUAACAU;AGACGUGACAU	15;41	4;1	Awan_Short;Awan_Long	21	7	5.32766	5.52744	7.33333	8	3.29095	2.04672	GTAAATAAACCACAAATACAGTCAGAATAATTTCCTTCTTGAGTAATATCCAATAGTTACTATTGATCCCCAGTTTATTAGCGCTGCAAACAGTTCATCGATTGCTTGCATGTTTGCAAGCACTGAGCCACAAGACAGACGTGACATTCGCAAAGTTTACAATTTACTAACATTATATTTGCAG	UACUAAC	UACUAAC	15	4	ACGUGAC	41	1	NA	No	YES	No	YES	No	NA	NA	0	0	No	No
II	3412393	3412464	72	-1	SPBC4B4.01c	SPBC4B4.01c.1:exon:3-SPBC4B4.01c.1:exon:2	int_4123	2	2	0	0	0	2	1	1	A	AUUGCUGACAC	12	2	Awan_Short	65	46	2.66499	3.95681	66	15.6667	4.67586	4.46955	GTACGGTAACAGTTGGACGGAGGAGAGTTTTTCCAATACTTGCAAGCGTTGACATTGCTGACACTTTTCTAG	UGCUGAC	UGCUGAC	12	2		NA	NA	NA	No	YES	No	NA	No	SPBC4B4.01c_intron2	UGCUGAC	10	3	YES	No
I	5368092	5368217	126	1	SPAC4D7.09	SPAC4D7.09.1:exon:2-SPAC4D7.09.1:exon:3	int_1115	45	45	0	0	0	25	2	1	A;A	AAUGCUAACCG;AAAUGCUAACC	15;16	38;7	Awan_Short	85	65	6.1193	6.17383	86	22	5.24753	5.53352	GTATGATTTATTTTTATGTATAAGTAGATATGCATGTGTTCTTAGACTTTTTGATCTTTTCTCTCTCATTCTGCAATTTAATTACTCGTCTTAAAGTCACAAAAAATGCTAACCGATACCCACCAG	UGCUAAC	UGCUAAC	15	38		NA	NA	NA	No	YES	No	NA	No	SPAC4D7.09_intron2	AUGCUAA;UGCUAAC	14;13	1;1	YES	No
I	2521918	2522033	116	1	SPAC23H3.14	SPAC23H3.14.1:exon:2-SPAC23H3.14.1:exon:3	int_540	9	9	0	0	0	7	1	1	A	UUGGCUAAUGC	12	9	Awan_Short	14	5	4.16136	4.01877	2.14286	1.5	3.46528	2.89912	GTATGTATATCTCATTAATTTAAAACGTACAGTGAAAATGGATGGATCAGTTTACAACCCGTTCTCTCCATTTTTTTCTCGAAAAATTGATAAATAATTGGCTAATGCAATTCCAG	GGCUAAU	GGCUAAU	12	9		NA	NA	NA	No	YES	No	NA	No	NA	NA	0	0	No	No
II	3399467	3399547	81	-1	SPBC13A2.01c	SPBC13A2.01c.1:exon:3-SPBC13A2.01c.1:exon:2	int_4121	66	66	0	0	0	47	2	1	A;A	CAUACUAACUU;ACAUACUAACU	12;13	46;20	Awan_Short	23	12	5.058	5.51727	24	6.5	4.57141	4.26676	GTATGTAGTCGGATTCTAAAAGAAGCGATATTTAATCAATACAGTCTCTGCAAACTTAATAACATACTAACTTGACTTTAG	UACUAAC	UACUAAC	12	46		NA	NA	NA	No	YES	No	NA	No	SPBC13A2.01c_intron2	UACUAAC	10	13	YES	No
I	2721101	2721201	101	1	SPAPB2B4.05	SPAPB2B4.05.1:exon:1-SPAPB2B4.05.1:exon:2	int_577	13	13	0	0	0	7	1	1	A	UUUGCUCACAU	18	13	Awan_Short	26	23	4.52463	4.56368	13.5	24	5.82158	5.58312	GTATGTAGGTTCGCTAACCATACATTCAGTATATAAATGAAGTATCATTTCTTCCAATCTTGGTATTATTTGAATTTTTGCTCACATTTTTCCCGTTTTAG	CGCUAAC	UGCUCAC	18	13		NA	NA	NA	No	No	No	NA	No	SPAPB2B4.05_intron1	UGCUCAC	16	13	YES	No
I	5332284	5332391	108	-1	SPAP8A3.09c	SPAP8A3.09c.1:exon:4-SPAP8A3.09c.1:exon:3	int_2334	5	5	0	0	0	5	1	1	A	UCGGCUAACAU	17	5	Awan_Short	24	16	5.56311	5.3218	6.25	2.83333	5.92926	5.80422	GTATGCATTCAATAATAAAATTATGGAACTATAGGTTTAAATTTTTAAAATTCTTTATATTTTTTAATAAACGATGTATGTTTGTCGGCTAACATTCCTTGAATACAG	GGCUAAC	GGCUAAC	17	5		NA	NA	NA	No	YES	No	NA	No	SPAP8A3.09c_intron3	GGCUAAC	15	3	YES	No
III	1008590	1008668	79	1	SPCC895.06	SPCC895.06.1:exon:1-SPCC895.06.1:exon:2	int_4585	18	18	0	0	0	16	2	1	A;A	CGAAUUAACCA;ACGAAUUAACC	12;13	16;2	Awan_Short	14	4	0.656676	0.948488	15	5	3.08372	2.83948	GTAAGTATTTTTTGTTGTAAAACTAAGTGTTATTTGCTTATGGGTTAATCCTCCAAATCACGAATTAACCAATAATTAG	AAUUAAC	AAUUAAC	12	16		NA	NA	NA	No	YES	No	No	No	SPCC895.06_intron1	AAUUAAC	10	4	YES	No
II	2490841	2490970	130	-1	SPBC557.03c	SPBC557.03c.1:exon:2-SPBC557.03c.1:exon:1	int_3876	2	2	0	0	0	2	1	1	A	AAAGCUAACCC	10	2	Awan_Short	51	31	6.80433	6.96686	17.3333	32	6.14568	6.39724	GTAAGTGGTACCAAAAAGTAAATGTAATTCTTGGATTTGCGTCTGGTGATGGTTGCATGGAATACGCGATGACATCTTGTTCTTTTTTAAATTACAAATCGATTGTTAGTAGCAAAGCTAACCCTTCCAG	AGCUAAC	AGCUAAC	10	2		NA	NA	NA	No	YES	No	NA	No	SPBC557.03c_intron1	AGCUAAC	8	1	YES	No
II	2295234	2295323	90	1	SPBC16H5.03c	SPBC16H5.03c.1:exon:2-SPBC16H5.03c.1:exon:3	int_2846	61	61	0	0	0	37	3	1	A;A;A	UUUAUUAACUC;AUUUAUUAACU;AACUCUUAUAC	15;16;9	53;6;2	Awan_Short	3	6	3.05356	3.42337	4	7	3.73608	4.57538	GTAAGTGAGTTGTATATTTAAATTTTTTAAACCTTAAGAAACGTTTCGTCTACATGTTTTTATCGCGATTTATTAACTCTTATACTGTAG	UAUUAAC	UAUUAAC	15	53	CUCUUAU	9	2	NA	YES	YES	No	No	No	SPBC16H5.03c_intron2	UAUUAAC;CUCUUAU	13;7	14;1	YES	No
II	1910423	1910492	70	1	SPBP16F5.07	SPBP16F5.07.1:exon:2-SPBP16F5.07.1:exon:3	int_2766	8	8	0	0	0	7	2	1	A;A	CGUACUAACAC;UCGUACUAACA	11;12	6;2	Awan_Short	14	15	2.05356	1.85995	7.5	8	4.13942	4.29693	GTATGTAAAAGTTAGATATTATGAAAGCCAACAATTCTTATTTTTTTATGGTCGTACTAACACTTTTCAG	UACUAAC	UACUAAC	11	6		NA	NA	NA	No	YES	No	No	No	SPBP16F5.07_intron2	UACUAAC	9	1	YES	No
II	496012	496128	117	1	SPBC902.06	SPBC902.06.1:exon:1-SPBC902.06.1:three_prime_UTR:2	int_2429	7	7	0	0	0	7	2	1	A;A	GUUGCUAAUCC;AGUUGCUAAUC	10;11	6;1	Awan_Short	0	0	3.20556	2.79694	0.25	0.333333	4.24588	4.13226	GTAAGTTCATACAAACATTGATTGAGGAGTGCTATCATTTAATTTGTCGTCCCTCTCGTACAAGTTTTTATTTTTTTTATATCGCTCATTTCTTTAAGAAGTTGCTAATCCTACTAG	UGCUAAU	UGCUAAU	10	6		NA	NA	NA	No	YES	No	NA	No	SPBC902.06_intron1	UGCUAAU	8	1	YES	No
II	4222382	4222516	135	-1	SPBC16G5.05c	SPBC16G5.05c.1:exon:2-SPBC16G5.05c.1:exon:1	int_4302	128	96	32	0	0	45	3	2	A;A;A	UUUAUUAACCU;AUUUAUUAACC;GCUUGCGAAUU	10;11;83	124;3;1	Awan_Short;Awan_Long	54	40	8.01635	8.03757	3.66667	3.15385	7.63558	7.56713	GTATGATTTATTACTTTGCATTAAATAAAAGATGAAAGTTCATCCGCTTGCGAATTCCTTGAGCTCGTTGTTGTGTCTGATCTCAAAATACCAATAATGTGCTGAAATGTTTTACATATTTATTAACCTAAATAG	GUCUGAU	UAUUAAC	10	124	UUGCGAA	83	1	NA	No	No	No	NA	No	SPBC16G5.05c_intron1	UAUUAAC	8	21	YES	No
II	3971162	3971325	164	1	SPBC26H8.10	SPBC26H8.10.1:exon:1-SPBC26H8.10.1:exon:2	int_3276	41	40	1	0	0	17	5	2	A;A;A;A;A	UUAAUUAACUC;AAAUUUAAUUA;UUUAAUUAACU;UGAAGCAAAAU;UUUUUUAAUGU	13;17;14;24;34	34;3;2;1;1	Awan_Short;Awan_Long	22	18	7.05685	7.11065	4.6	4.75	6.81087	6.60018	GTAAGTATTAAAGGAATCCCACATGAGTAATTTGCATTGGTCTGGAATTAGTTGGTATAATTTTCTGTGAAGTTAATTTCTGAGAGCTATTGAAACTAATTCATTTACTATTCAATTTCATTTTTTTTTAATGTGAAGCAAAATTTAATTAACTCTTACGATAG	AACUAAU	AAUUAAC	13	34	AUUUAAU	17	3	NA	No	No	No	NA	No	SPBC26H8.10_intron1	AUUUAAU;AAUUAAC	15;11	3;32	YES	No
II	3479010	3479109	100	1	SPBC1718.05	SPBC1718.05.1:exon:2-SPBC1718.05.1:exon:3	int_3181	15	15	0	0	0	11	2	1	A;A	UUUAACUAACU;UUAACUAACUG	14;13	10;5	Awan_Short	5	5	0.731637	1.60841	3	2	3.16603	3.56218	GTATGTTTTCTATTGCTATGCAAATATTCGAACAAGCTATCATACGCGTTCTTGAATTTTTTTATTTATTATTCGTGTTTTTAACTAACTGGAGCTATAG	AACUAAC	AACUAAC	13	5		NA	NA	NA	No	YES	No	NA	No	NA	NA	0	0	No	No
II	4244391	4244497	107	1	SPBC16G5.16	SPBC16G5.16.1:exon:2-SPBC16G5.16.1:exon:3	int_3327	1	1	0	0	0	1	1	1	A	UUUUCUAACUU	12	1	Awan_Short	1	0	3.72148	3.44939	2	1	0.421299	-16.6096	GTAAGTGCCTACAATTTAGATGAGATTATTTTCTTCAAGTTTAGTCGCTTTAAAATTTATTTCAAGCCTCTATTATAATTGGATGGAGTTTTCTAACTTTGTTGAAG	UUCUAAC	UUCUAAC	12	1		NA	NA	NA	No	YES	No	NA	No	NA	NA	0	0	No	No
I	979022	979119	98	1	SPAC222.18	SPAC222.18.1:exon:1-SPAC222.18.1:exon:2	int_214	9	9	0	0	0	9	2	1	A;A	UGUUCUAAUUG;CUGUUCUAAUU	14;15	8;1	Awan_Short	31	10	5.74946	5.02987	1.28	1.22222	4.58129	4.41576	GTAATTGTTATTGAATGACTGATTGTAGATTACAACTTTGGTTTTCAGTCAAGTGATCTCTATTTTTGTATCGCATCTGTTCTAATTGATGATAATAG	UUCUAAU	UUCUAAU	14	8		NA	NA	NA	No	YES	No	No	No	SPAC222.18_intron1	UUCUAAU	12	3	YES	No
I	1826810	1826964	155	-1	SPAC1002.15c	SPAC1002.15c.1:exon:2-SPAC1002.15c.1:exon:1	int_1568	22	15	7	0	0	13	2	2	A;A	UUUGCUAAUAU;UUUUGCUAAUA	15;16	20;2	Awan_Short;Awan_Long	12	15	4.22864	4.45726	2.6	8	3.6443	3.87722	GTGAGTTTAACATTTTTTGTTTGCGCAGTATGCCCTCTTAAAATAGACTCTGTACAATTCGAAGAGAAAAAAATTTAAAGAGATGTAATTAGTTGATAAAGCAGCAAACAACTTCCAATTTGTTGCGTGTAATTTTGCTAATATAGAAAACTTAG	UGCUAAU	UGCUAAU	15	20		NA	NA	NA	No	YES	No	NA	No	SPAC1002.15c_intron1	UGCUAAU	13	4	YES	No
II	1563267	1563344	78	-1	SPBC27.02c	SPBC27.02c.1:exon:3-SPBC27.02c.1:exon:2	int_3695	11	11	0	0	0	5	1	1	A	UAAGCUAACAG	11	11	Awan_Short	11	6	2.89744	3.08234	4	1.75	2.89905	2.57419	GTATGTTCAATGGCAACTGCCACTCATGATTCAGCTTGTAATTTGTATTATTTTAAGAATTAAGCTAACAGAAAACAG	AGCUAAC	AGCUAAC	11	11		NA	NA	NA	No	YES	No	No	No	SPBC27.02c_intron2	AGCUAAC	9	10	YES	No
I	4264153	4264213	61	-1	SPAC2C4.03c	SPAC2C4.03c.1:exon:4-SPAC2C4.03c.1:exon:3	int_2115	4	4	0	0	0	4	1	1	A	CUUGCUAAUAU	12	4	Awan_Short	39	33	5.14519	5.26012	20	11.3333	4.69366	4.60997	GTAATAATTTTTTTCATCTTTTAGTCTCTCTTTCCATCCACACTTGCTAATATATTCTTAG	UGCUAAU	UGCUAAU	12	4		NA	NA	NA	No	YES	No	NA	No	SPAC2C4.03c_intron3	UGCUAAU	10	1	YES	No
II	3773679	3773794	116	1	SPBC31F10.12	SPBC31F10.12.1:exon:3-SPBC31F10.12.1:exon:4	int_3247	77	75	2	0	0	21	2	2	A;A	UAUACUAAUAC;AUAUACUAAUA	10;11	69;8	Awan_Short;Awan_Long	22	33	7.02133	7.18436	2.3	3.09091	6.75513	6.74608	GTGAGTATAAGCTAACGTAACCGCAACGTTTGATTGGAGTTCTGGTTTTTGTCTAGCTGGTCAGAATCGACAACAACATATCTGTGTTTAGTTCAAATATATACTAATACGCCTAG	UACUAAU	UACUAAU	10	69		NA	NA	NA	No	YES	No	NA	No	SPBC31F10.12_intron3	UACUAAU	8	24	YES	No
II	3110463	3110579	117	1	SPBC1778.07	SPBC1778.07.1:exon:1-SPBC1778.07.1:exon:2	int_3043	33	33	0	0	0	22	3	1	A;A;A	GCUUCUAACAU;AGCUUCUAACA;UUUGGACAUAG	11;12;21	25;7;1	Awan_Short	60	53	5.04428	5.06372	4.69231	18	5.63599	5.52676	GTAGGTACACTTGATACTATCAATCAAAAATAGCATGATTTATTATTTATCTGATTACATGTTTTCTAACTTCTTTCTAAATTTGGATTTTTGGACATAGCTTCTAACATTTAATAG	UUCUAAC	UUCUAAC	11	25	UGGACAU	21	1	NA	No	YES	No	YES	No	SPBC1778.07_intron1	UUCUAAC	9	9	YES	No
I	4502431	4502509	79	1	SPAC1851.03	SPAC1851.03.1:exon:1-SPAC1851.03.1:exon:2	int_913	19	19	0	0	0	8	1	1	A	UUUAUUAAUCA	14	19	Awan_Short	50	34	3.92969	3.45098	8.5	11.6667	5.29993	5.35637	GTTTGTGCAAATTAGGGTTAAATAAAAAAATATTTTACATTTTGGCCATATTGGACCGTTTATTAATCATTAATTGCAG	CAUUAAU	UAUUAAU	14	19		NA	NA	NA	No	No	No	NA	No	SPAC1851.03_intron1	UAUUAAU	12	3	YES	No
I	4991558	4991705	148	1	SPAC1952.13	SPAC1952.13.1:exon:2-SPAC1952.13.1:exon:3	int_1036	68	34	34	0	0	34	3	2	A;A;A	AUUACUAACAG;AAUUACUAACA;GGCUUUUAGUU	15;16;42	61;6;1	Awan_Short;Awan_Long	35	32	8.40205	8.68426	7.2	6.6	4.99748	4.98718	GTATGTACAAAAGTAAACTGGGGCTGACTTGTCCGGTGGAAAACAGTTATGTGCAATATTTTAATGAATACGGTATCAGAATTCTGCACAACTACTTTCGGCTTTTAGTTTATCTCAATCACGAAAATTACTAACAGTCTTGCTTTAG	UACUAAC	UACUAAC	15	61	CUUUUAG	42	1	NA	No	YES	No	YES	No	SPAC1952.13_intron2	UACUAAC	13	8	YES	No
I	2643684	2643859	176	1	SPAC4F8.14c	SPAC4F8.14c.1:exon:1-SPAC4F8.14c.1:exon:2	int_562	35	30	5	0	0	21	5	2	A;A;A;A;A	GAUAUUAAUCG;UGAUAUUAAUC;AGUACAAAUUU;UACCUACAUCU;AUUACCUACAU	18;19;87;107;109	31;1;1;1;1	Awan_Short;Awan_Long	162	131	7.01934	6.98594	163	44	6.99998	6.94858	GTATGTTATAAATGAGTCGCTACTTTATTTCAAAACTTCTCCTCCAAATTATTTGCATGCATTACCTACATCTTTTTTCAATAGTACAAATTTACGCAAGCTTCAGAGGAAAGTAATAGAAATACTTTCTCATTAAATTCCTTCAGAACCTGATATTAATCGTTTTTACCCTATAG	ACCUGAU	UAUUAAU	18	31	CCUACAU	107	1	NA	No	No	No	NA	No	SPAC4F8.14c_intron2	UACCUAC;UACAAAU;UAUUAAU	107;85;16	1;1;12	YES	No
III	981129	981210	82	1	SPCC1795.08c	SPCC1795.08c.1:exon:1-SPCC1795.08c.1:exon:2	int_4577	5	5	0	0	0	4	2	1	A;A	AUAACUAAUUA;GAUAACUAAUU	22;23	3;2	Awan_Short	10	8	1.82529	2.1171	11	9	2.22168	1.77653	GTACGTTTTTACGAGTCTTACGGGCCTTAAAGTGATAATTTTATTGTACTTCGATAACTAATTAATATTTTTAATTAAAAAG	AACUAAU	AACUAAU	22	3		NA	NA	NA	No	YES	No	NA	No	SPCC1795.08c_intron1	AACUAAU	20	1	YES	No
II	2371244	2371350	107	-1	SPBC19G7.10c	SPBC19G7.10c.1:exon:3-SPBC19G7.10c.1:exon:2	int_3852	39	39	0	0	0	23	1	1	A	UUUUCUCACAA	10	39	Awan_Short	239	123	6.48577	6.70719	60	17.7143	7.02202	6.95115	GTATGTACCTTTGTGCTTGTGATTCTGTAATCATTCTCGGCTGTCATATCTGGGATATTGCAAGCTATTAGTATTTAATATTTTAATATTTTTTCTCACAATTCTAG	UUUUAAU	UUCUCAC	10	39		NA	NA	NA	No	No	No	No	No	SPBC19G7.10c_intron2	UUCUCAC	8	16	YES	No
I	3442049	3442126	78	-1	SPAC3A11.13	SPAC3A11.13.1:exon:3-SPAC3A11.13.1:exon:2	int_1910	26	26	0	0	0	18	2	1	A;A	UUUGUUAAUGC;UUUUGUUAAUG	11;12	23;3	Awan_Short	19	14	4.33801	3.96686	10	7.5	5.51114	5.40019	GTACGTTAAGGCCACAAAAATTACTATTTTCCCTATTTTCTCCATTTATATTAGAATTGTTTTGTTAATGCGAATTAG	UGUUAAU	UGUUAAU	11	23		NA	NA	NA	No	YES	No	NA	No	SPAC3A11.13_intron2	UGUUAAU	9	2	YES	No
I	1939005	1939074	70	1	SPAC3H1.05	SPAC3H1.05.1:exon:1-SPAC3H1.05.1:exon:2	int_411	4	4	0	0	0	3	2	1	A;A	UGUAUUAACGU;UUGUAUUAACG	12;13	3;1	Awan_Short	24	24	2.83117	2.70794	6.25	6.25	2.37946	2.53851	GTATATAACGATTAGTTGATTTTTTATGAATATATTTGGGGTTTAAAACTTTGTATTAACGTTTTTATAG	UAUUAAC	UAUUAAC	12	3		NA	NA	NA	No	YES	No	NA	No	NA	NA	0	0	No	No
I	4972663	4972851	189	-1	SPAC1952.04c	SPAC1952.04c.1:exon:4-SPAC1952.04c.1:exon:3	int_2270	18	16	2	0	0	14	2	2	A;A	CUUGCUAACUC;ACUUGCUAACU	11;12	16;2	Awan_Short;Awan_Long	2	2	4.97311	5.39968	0.333333	0.75	3.88245	3.44912	GTAAGGGAATTCAAGAAAGCATATGTTATGTAGTTGACCCTTTCTACTTATCATTGTTTGGAAACCTGACAGACCTTGTTTGTTATTTTCTAAGCCATTCTTCAATCTTCAATGTTACATGCTTTCCAGGGAAAGTTGGGATTATTTTGCTGTCCAACTAATAAGCACTCACTTGCTAACTCAGAGCAG	UGCUAAC	UGCUAAC	11	16		NA	NA	NA	No	YES	No	NA	No	SPAC1952.04c_intron3	UGCUAAC	9	4	YES	No
I	4476475	4476616	142	-1	SPAC17C9.14	SPAC17C9.14.1:exon:2-SPAC17C9.14.1:exon:1	int_2161	53	32	21	0	0	33	3	2	A;A;A	ACAACUAACAA;AACAACUAACA;GGAAACAACUA	11;12;15	45;7;1	Awan_Short;Awan_Long	48	28	6.84045	7.02535	2.88235	1.07407	4.40029	4.17519	GTATGGAACATCGGTAATGTCCTGACTACGATTTGTGTATTACGATATTTCGTTCAAGTGAATTTTGCATTGCATAAATATAAAAAATAATGAGAGGGTAGAAAGGACTTTACATTAAAAGGAAACAACTAACAAAACAAAG	AACUAAC	AACUAAC	11	45	AAACAAC	15	1	NA	No	YES	No	YES	No	SPAC17C9.14_intron1	AACUAAC	9	10	YES	No
I	401872	401971	100	-1	SPAC31A2.07c	SPAC31A2.07c.1:exon:2-SPAC31A2.07c.1:exon:1	int_1202	29	29	0	0	0	21	2	1	A;A	UUUUCUAACUU;UUUUUCUAACU	12;13	27;2	Awan_Short	12	18	3.25519	4.8048	13	9.5	5.67871	5.47954	GTATGTTAACTTCGTGATTACTTGCCATAAGGTCACTTTGCATTATGCTTCAAGACACTGTAATCTAAATTACTTTGATATTTTTCTAACTTAATTATAG	UUCUAAC	UUCUAAC	12	27		NA	NA	NA	No	YES	No	NA	No	SPAC31A2.07c_intron1	UUCUAAC;UUUCUAA	10;11	7;1	YES	No
I	922748	922892	145	1	SPAC1687.11	SPAC1687.11.1:exon:3-SPAC1687.11.1:exon:4	int_199	199	54	145	0	0	49	3	2	A;A;A	UUUAUUAAUGC;UUUUAUUAAUG;AAUUUUUAUUA	13;14;17	188;10;1	Awan_Short;Awan_Long	113	79	6.59218	6.77741	19	20	6.61524	6.57907	GTAAGTAATTGATATGCTGCAGGAAGCGGTTAAACGGGTGCAACTATTCTTGTTTCACTTGCAATCTTAGAAATTTGATTGAACTGATTAGAATATTTGTTGCCCATATTGGTTTTTGTCGAATTTTTATTAATGCATTGAGCAG	AACUGAU	UAUUAAU	13	188	UUUUUAU	17	1	NA	No	No	No	No	No	SPAC1687.11_intron3	UAUUAAU	11	8	YES	No
II	1537107	1537266	160	1	SPBC83.15	SPBC83.15.1:exon:2-SPBC83.15.1:exon:3	int_2691	7	5	2	0	0	6	2	2	A;A	CUGAUUAACUU;ACUGAUUAACU	15;16	5;2	Awan_Short;Awan_Long	112	107	7.84472	7.81705	10.2727	36	7.09905	7.05325	GTACGGAATTTTTGAGATTTCTGTGATAACGCATTATGAACTAAAAAGAAGCAACTTTATTGACGCTTGTTTCTTCGTTACTATTATCAAATGGATTGCGCGTTACTAGGATATCCTGTGTTTATATTTCGAAAAACACTGATTAACTTGTTAATTTTAG	CACUGAU	GAUUAAC	15	5		NA	NA	NA	No	No	No	NA	No	SPBC83.15_intron2	GAUUAAC	13	1	YES	No
II	296307	296404	98	-1	SPBC1773.07c	SPBC1773.07c.1:exon:3-SPBC1773.07c.1:exon:2	int_3407	34	34	0	0	0	19	2	1	A;A	GGUACUAACCA;UGGUACUAACC	15;16	32;2	Awan_Short	326	450	5.04618	5.37452	109	75.1667	8.84048	9.42909	GTAAGTTTTTTTTTGGTAGAAATACCGATGTTTTATCAATCCAGTTGATATTAACAAATAACCCTATTTCAACTGTGGTACTAACCAAACCTCGTTAG	UACUAAC	UACUAAC	15	32		NA	NA	NA	No	YES	No	No	No	SPBC1773.07c_intron2	UACUAAC	13	1	YES	No
I	3527863	3528008	146	-1	SPAC16E8.14c	SPAC16E8.14c.1:exon:3-SPAC16E8.14c.1:exon:2	int_1947	14	10	4	0	0	10	3	2	A;A;A	AUUAUUAACAU;UAUUAUUAACA;AAUUUGUAUUA	11;12;18	11;2;1	Awan_Short;Awan_Long	5	5	3.70922	4.43167	6	6	4.29808	4.17107	GTATGTAAAAGAAAATTTACCAAGAGAATTATATTTTTAGAAAACGGGTGTAAACGTTCAAAAGACTCAATCTCAACTTACTGTTACATCTCTATCTTTTTTTAAGACTATTTATTTAAATAATTTGTATTATTAACATTCTACAG	UAUUAAC	UAUUAAC	11	11	UUUGUAU	18	1	NA	No	YES	No	YES	No	SPAC16E8.14c_intron2	UAUUAAC	9	3	YES	No
II	2650534	2650637	104	-1	SPBC6B1.09c	SPBC6B1.09c.1:exon:4-SPBC6B1.09c.1:exon:3	int_3907	50	50	0	0	0	25	2	1	A;A	CCAGCUAAUAU;GCCAGCUAAUA	12;13	45;5	Awan_Short	0	0	1.99698	0.551831	0.333333	1	1.96367	1.77006	GTACGTATCCAATTAAATGGAAATATTGAGCTTTTCATTTTTCATTTCTATTATATGTTTATCTTTCTTATATTTTAAATCAATGCCAGCTAATATGTGCACAG	AGCUAAU	AGCUAAU	12	45		NA	NA	NA	No	YES	No	NA	No	SPBC6B1.09c_intron3	AGCUAAU	10	9	YES	No
II	3348050	3348143	94	1	SPBC11C11.02	SPBC11C11.02.1:exon:1-SPBC11C11.02.1:exon:2	int_3137	12	12	0	0	0	10	2	1	A;A	UUAACUAACAU;ACACCUUAACU	14;19	11;1	Awan_Short	0	2	3.90836	4.81315	1	3	-2.81917	-1.30503	GTATGGTGTCTAAGCCAACGTGGATAGCTCATTATCTGCCAAAACTTTCGATTTTTGTGTTAAACACAACACCTTAACTAACATTCTTTATTAG	AACUAAC	AACUAAC	14	11	ACCUUAA	19	1	NA	No	YES	No	NA	No	SPBC11C11.02_intron1	AACUAAC	12	5	YES	No
II	452417	452596	180	-1	SPBC428.06c	SPBC428.06c.1:exon:5-SPBC428.06c.1:exon:4	int_3449	6	6	0	0	0	6	1	1	A	CUUGCUAACUC	18	6	Awan_Short	6	5	6.11245	6.21436	1.75	6	2.56813	2.63755	GTAAGTCGTACACACACTTAGTTATGTTAGACATACAATTTTTTTGATTCATTGTGCTTTTGGAGATTTCGTGTTGTGTTTTCAAAGATTGATTATGAATTGAATTGAAATATTAGTTATCAGCACTCGCCAATCATGGTCATATACATCGATCGCTTGCTAACTCAGTAAAAATTATAG	UGCUAAC	UGCUAAC	18	6		NA	NA	NA	No	YES	No	NA	No	SPBC428.06c_intron4	UGCUAAC	16	4	YES	No
III	2196929	2197061	133	-1	SPCC830.08c	SPCC830.08c.1:exon:2-SPCC830.08c.1:exon:1	int_5310	39	25	14	0	0	27	2	2	A;A	UUUACUAACUU;GUUUACUAACU	14;15	35;4	Awan_Short;Awan_Long	119	79	6.33701	6.17426	120	80	6.44515	6.1151	GTATGTTAGCAATAAGGCAGGATATCCGATGGAAGCCGCTTTACGCACTCGGCAATATAGGCTATTATTAGTATCTTGTGATTTTAGAAATTATTCTTTCTATTCAAATTTGTTTACTAACTTTTTTTTCCAG	UACUAAC	UACUAAC	14	35		NA	NA	NA	No	YES	No	No	No	SPCC830.08c_intron1	UACUAAC	12	3	YES	No
I	2830807	2830991	185	1	SPAC3F10.19	SPAC3F10.19.1:exon:2-SPAC3F10.19.1:exon:3	int_611	43	18	25	0	0	28	3	2	A;A;A	UUUACUAACUU;UUUUACUAACU;UAUAGAAACUA	10;11;61	37;5;1	Awan_Short;Awan_Long	6	3	4.65146	4.79413	1.75	4	4.96045	4.25226	GTACGTGAATCAAATTTAAAAAAAAAAAATGAGTGGATTTGTTTATTAATACCTTAATCAAAAATTTCTATAAAGCACTCTTTCTTCATGTTTATACTTTTAATGGAAAACTGTTTTTATAGAAACTACTTCCTTTCTACCTTTTTTCCTGTTTAGATGAAAGCAGTTTTTACTAACTTTAGCAG	UACUAAC	UACUAAC	10	37	UAGAAAC	61	1	NA	No	YES	No	NA	No	SPAC3F10.19_intron2	UACUAAC	8	9	YES	No
I	570407	570548	142	1	SPAC2F7.17	SPAC2F7.17.1:exon:1-SPAC2F7.17.1:exon:2	int_89	28	24	4	0	0	19	2	2	A;A	UGAUCUAACUU;AUGAUCUAACU	15;16	25;3	Awan_Short;Awan_Long	18	23	6.63937	7.3441	4.75	8	2.45251	2.31647	GTAAGTGTCGGCAAACAAAGTGTGAAATCAGCCTGCTACTGTTCGAGATACAATAATAATGGTAATACAAGCATACCGGACATTAAGCTTTACTCATGAAAAATTAAAATCTGATATAAATGATCTAACTTATATCTTTTAG	AUCUAAC	AUCUAAC	15	25		NA	NA	NA	No	YES	No	NA	No	SPAC2F7.17_intron1	AUCUAAC	13	10	YES	No
I	2621520	2621661	142	-1	SPAC7D4.10	SPAC7D4.10.1:exon:5-SPAC7D4.10.1:exon:4	int_1740	21	21	0	0	0	7	2	1	A;A	AAUUCUAACCA;CAAUUCUAACC	9;10	19;2	Awan_Short	53	32	5.652	5.84847	13.5	33	6.53776	6.35772	GTAAGTCATTTATACATTGTTGAAAGCTTTGATAGTCTTGATAGTGGATGTTTGTCTTTTGAAATTACCTTTTAATTATTTCATCCCTTTATGTTGACAAATCGAATTTTTTTGCGGTTTTAAAGCAATTCTAACCACTTAG	UUCUAAC	UUCUAAC	9	19		NA	NA	NA	No	YES	No	NA	No	NA	NA	0	0	No	No
II	1420672	1420751	80	1	SPBC691.01	SPBC691.01.1:exon:1-SPBC691.01.1:exon:2	int_2655	12	12	0	0	0	9	2	1	A;A	UAUGCUAAUUA;AUAUGCUAAUU	16;17	11;1	Awan_Short	0	0	1.37549	1.6673	1	1	0.360546	-0.517556	GTACGTGAATGAAGGGCCAATTCTAACCGCTAAGAAAGAATTTCCATTATATAGTCATATGCTAATTATATTCTATACAG	UGCUAAU	UGCUAAU	16	11		NA	NA	NA	No	YES	No	No	No	SPBC691.01_intron1	UGCUAAU	14	5	YES	No
III	984641	984710	70	-1	SPCC1795.07	SPCC1795.07.1:exon:2-SPCC1795.07.1:exon:1	int_5084	1	1	0	0	0	1	1	1	A	UUAACUAAUGA	13	1	Awan_Short	107	108	5.63852	5.6673	3.48387	6.05556	6.54767	6.28195	GTATGAAAAGATCATTTGTGAACGTAGCTGTCTTCGACAACTTTTTCAACTTAACTAATGAATATTTCAG	AACUAAU	AACUAAU	13	1		NA	NA	NA	No	YES	No	NA	No	SPCC1795.07_intron1	AACUAAU	11	1	YES	No
II	3955745	3955859	115	-1	SPBC26H8.05c	SPBC26H8.05c.1:exon:2-SPBC26H8.05c.1:exon:1	int_4241	13	13	0	0	0	11	3	1	A;A;A	GGGUCUAACGU;GGGGUCUAACG;CUUUGCCAUAA	14;15;36	8;4;1	Awan_Short	12	14	4.57439	4.95109	4.33333	7.5	3.82189	3.99745	GTATGTATAATAGTATTTATAGAATAACTTTTATCTCCGTCGATATAACAACGATCATTCATATTGGTTGTTCTTTGCCATAATTATAAGAATGGGGTCTAACGTTTTGTGGTAG	GUCUAAC	GUCUAAC	14	8	UUGCCAU	36	1	NA	No	YES	No	YES	No	SPBC26H8.05c_intron1	GUCUAAC	12	1	YES	No
I	925858	925961	104	-1	SPAC1687.12c	SPAC1687.12c.1:exon:3-SPAC1687.12c.1:exon:2	int_1317	12	12	0	0	0	10	2	1	A;A	UUUACUAAUGC;AUUUACUAAUG	7;8	11;1	Awan_Short	0	0	4.40297	4.25226	0.0526316	0.125	4.72733	4.93033	GTATGAAATTTAGGTAGTAAAAACACTTCGGCAAATTCTTTTGACCTTTGCTACAGAAGTTGGTGAAAAGCTATATTTACTTTTTCTGGATTTACTAATGCTAG	UACUAAU	UACUAAU	7	11		NA	NA	NA	No	YES	No	NA	No	SPAC1687.12c_intron2	UACUAAU	5	3	YES	No
I	3639265	3639385	121	-1	SPAC1142.07c	SPAC1142.07c.1:exon:2-SPAC1142.07c.1:exon:1	int_1976	20	16	4	0	0	14	3	2	A;A;A	UAAACUAACUU;CUAACUUACAU;AUAAACUAACU	12;8;13	14;3;3	Awan_Short;Awan_Long	104	103	5.91605	6.48315	26.25	26	5.18237	5.43225	GTACGTCTATAGTTAAACTTCCATCAGGAAATGTACCGTTTGCTTGATCACATTTGTAGTCTCGGTGAAGCAACGATGTGCATGTAAATTAAATGATTTTTATAAACTAACTTACATATAG	AACUAAC	AACUAAC	12	14	AACUUAC	8	3	NA	YES	YES	No	No	No	SPAC1142.07c_intron1	AACUUAC;AACUAAC;AAACUAA	6;10;11	1;3;1	YES	No
III	2328364	2328462	99	-1	SPCC1494.04c	SPCC1494.04c.1:exon:2-SPCC1494.04c.1:exon:1	int_5336	48	48	0	0	0	29	2	1	A;A	CCUUCUAACAU;ACCUUCUAACA	13;14	46;2	Awan_Short	110	81	4.67687	4.8453	27.75	11.7143	5.30893	5.4019	GTAAGTAAATAATTTTTGTTCTACAATCTACAATTAGCTCTCCTTTTCAAAGTGCCTTTAGGGACTTTTTCTATTAGCACCTTCTAACATCATAAATAG	UUCUAAC	UUCUAAC	13	46		NA	NA	NA	No	YES	No	NA	No	SPCC1494.04c_intron1	UUCUAAC	11	18	YES	No
I	3505015	3505580	566	1	SPAC16E8.02	SPAC16E8.02.1:exon:3-SPAC16E8.02.1:three_prime_UTR:1	int_727	1	1	0	0	0	1	1	1	A	CAUCUUUACCC	303	1	Awan_Short	0	0	4.3907	4.45338	0.166667	0.2	3.6312	3.59496	TTTTCCTTTTCAGTTCGGCAAGCATTACTAACAATTTTGGTTTTATTAGAATATTTGGATCTGCTAGACACTTTGGCAGCCGCTTCTAGCCGCCCACTCCTCGGTGCATACCAAAACCTTTTCATGGAAATGAAGAAAGACTTTCATTCAACATACTACATTATCGTAGTGGAGGATCTTGAATCTCATCATGTCGTATGTCCACACTAATATGAGCTGTCCTGTTTGCAAGGCATTAATCCCTTGACAGACGCAGCATCTTTACCCTGTATTTTTTACCTATTACTAATATTTAGATTGGTACGGCCACATTATTCTTGGAGCGAAAGTTTTTACGTGGAAAAGGAATTTGCGGACACATAGAAGAAGTCATTGTGCATCCGGATCATCAGAGAAAAG…		UCUUUAC	303	1		NA	NA	NA	No	No	No	NA	No	NA	NA	0	0	No	No
I	3567639	3567740	102	-1	SPAC17A2.07c	SPAC17A2.07c.1:exon:2-SPAC17A2.07c.1:exon:1	int_1958	40	40	0	0	0	24	3	1	A;A;A	UAUAUUAACAG;AUAUAUUAACA;UGUCAAUAUAU	13;14;19	35;4;1	Awan_Short	20	13	4.98846	5.06096	5.25	7	4.10048	3.95789	GTATGTATACTATCGATTAACCTTTTGAATAAATTTAAAAGGGAAAGCGAATTCTCTTACAATATCCTTTATTCCATGTCAATATATTAACAGTCGGTGCAG	UAUUAAC	UAUUAAC	13	35	UCAAUAU	19	1	NA	No	YES	No	YES	No	SPAC17A2.07c_intron1	UAUUAAC;UCAAUAU	11;17	8;1	YES	No
I	2340276	2340391	116	1	SPAC6C3.09	SPAC6C3.09.1:exon:3-SPAC6C3.09.1:exon:4	int_501	34	34	0	0	0	24	2	1	A;A	AUUGCUUACAG;UAUUAUUACCC	12;64	33;1	Awan_Short	10	13	6.3184	6.6295	1.375	2.8	4.12756	4.22673	GTGAGTTATTTTACGGTACTGTTCGCTTTTCATATCTCTATAGGATATTATTACCCAGCCAAACAATTTCGGGTATCTTTAAGATTTTGAAATTTTTATTGCTTACAGTTAATAAG	AGUUAAU	UGCUUAC	12	33	UUAUUAC	64	1	NA	No	No	No	NA	No	SPAC6C3.09_intron3	UGCUUAC	10	8	YES	No
II	4269046	4269135	90	1	SPBC16A3.15c	SPBC16A3.15c.1:exon:1-SPBC16A3.15c.1:exon:2	int_3328	7	7	0	0	0	7	2	1	A;A	UUAGCUAACAU;UUUAGCUAACA	10;11	5;2	Awan_Short	154	176	6.35124	6.937	77.5	59	6.67898	6.86993	GTATGTTCAATATCCATCTTTTTGTATTGCTGTATACTCTAAATAGTTGGCAATCGATTTTTTCATAAAAAATTTAGCTAACATTTCTAG	AGCUAAC	AGCUAAC	10	5		NA	NA	NA	No	YES	No	No	No	SPBC16A3.15c_intron1	AGCUAAC	8	1	YES	No
I	3612487	3612597	111	1	SPAC17G6.12	SPAC17G6.12.1:exon:3-SPAC17G6.12.1:exon:4	int_739	2	2	0	0	0	2	2	1	A;A	GAUUCUAACUG;GGAUUCUAACU	14;15	1;1	Awan_Short	21	20	6.94301	6.60759	4.4	7	4.60104	4.50291	GTACGTAAAAAATAGATAAAAATTTATATTTTGACTCAGAATTTGTCAAAAAGAAGAACTACATATATTTTCTTATGATTATTTTCACTGGATTCTAACTGTATGTGCTAG	UUCUAAC	UUCUAAC	14	1		NA	NA	NA	No	YES	No	NA	No	NA	NA	0	0	No	No
I	3839158	3839281	124	-1	SPAC4H3.07c	SPAC4H3.07c.1:exon:2-SPAC4H3.07c.1:exon:1	int_2017	38	35	3	0	0	29	2	2	A;A	GGUACUAACUU;CGGUACUAACU	11;12	34;4	Awan_Short;Awan_Long	280	256	7.11478	7.25613	20.0714	51.4	8.1819	8.03696	GTAAACCAACATAGGAATACGTTTGCTTTCATATGCGATGTTTTCTGGTTAAAGCTAAGTTTTACACTTCGCTACTCTACTCTCCAAGTATTTTGGAATTATTAACGGTACTAACTTGAAATAG	UACUAAC	UACUAAC	11	34		NA	NA	NA	No	YES	No	NA	No	SPAC4H3.07c_intron1	UACUAAC	9	9	YES	No
I	4481735	4481892	158	1	SPAC17C9.11c	SPAC17C9.11c.1:exon:2-SPAC17C9.11c.1:exon:3	int_902	6	6	0	0	0	5	2	1	A;A	AUUAUUAACGC;UAUUAUUAACG	12;13	5;1	Awan_Short	12	8	10.9671	10.5908	2.6	4.5	6.70788	6.74517	GTAAGTATCAAACTAGTGTTTACTGTCATCATGTGTGACATTAGAATACATGTTTTTGAAAGAATATTGTGTTGCTACTAGCATCTAAACGACATATCTTTGTTTCCTCTGAAAACTTTGAACTATAGACATGGAATATATTATTAACGCTTGCATAG	UAUUAAC	UAUUAAC	12	5		NA	NA	NA	No	YES	No	NA	No	SPAC17C9.11c_intron2	UAUUAAC	10	2	YES	No
II	731551	731632	82	1	SPBC119.08	SPBC119.08.1:exon:3-SPBC119.08.1:exon:4	int_2474	38	38	0	0	0	23	3	1	A;A;A	CUUACUAACUA;ACUUACUAACU;AUUACUUACUA	13;14;17	30;4;4	Awan_Short	7	1	2.82529	3.47967	2.66667	0.666667	4.15976	3.8193	GTATGTTACGCGATGATCCACATATGGTGTCTGTTTTAGTCACGGAAATATTTGTATAATTACTTACTAACTATTATAATAG	UACUAAC	UACUAAC	13	30	UACUUAC	17	4	NA	No	YES	No	No	No	SPBC119.08_intron3	UACUUAC;UUACUAA;UACUAAC	15;12;11	3;1;26	YES	No
I	4891293	4891364	72	-1	SPAC19B12.05c	SPAC19B12.05c.1:exon:6-SPAC19B12.05c.1:exon:5	int_2246	3	3	0	0	0	3	2	1	A;A	UUAACUAACGC;AUUAACUAACG	12;13	2;1	Awan_Short	90	65	3.906	3.49737	11.375	5.5	5.40075	5.17369	GTAAGCATTGAACTTTCTTAATATCATTGAGTTTTTAGAATGATAGACCCAGATTAACTAACGCCTTTTTAG	AACUAAC	AACUAAC	12	2		NA	NA	NA	No	YES	No	No	No	NA	NA	0	0	No	No
III	1754928	1755050	123	1	SPCC1450.12	SPCC1450.12.1:exon:2-SPCC1450.12.1:exon:3	int_4715	7	7	0	0	0	7	1	1	A	GCCGCUAACGA	13	7	Awan_Short	18	13	2.43297	1.89471	19	14	5.55519	5.54444	GTAAGTTCTTTGCAGTTCTAAAAAAGGAAACGAATCTAATTGTTTTAATAATCACATTTTTCGATTACCGTTTTTACGAAAATTTGCTTTTGCTTCTTCATAAGCCGCTAACGAATATTCCAG	CGCUAAC	CGCUAAC	13	7		NA	NA	NA	No	YES	No	No	No	NA	NA	0	0	No	No
III	660198	660297	100	1	SPCC16C4.01	SPCC16C4.01.1:exon:4-SPCC16C4.01.1:exon:5	int_4511	69	69	0	0	0	30	2	1	A;A	UUUGCUAACAC;GUUUGCUAACA	18;19	60;9	Awan_Short	17	13	2.97956	2.19337	18	14	4.64637	4.4818	GTACGTTTGGCCGATGGTTTCAAATTGAATGACTTCCGTTTAGTAATCAACAATTCCAACAAATTTATTTTACTGTTTGCTAACACATTATTCTACATAG	UGCUAAC	UGCUAAC	18	60		NA	NA	NA	No	YES	No	NA	No	SPCC16C4.01_intron4	UUGCUAA;UGCUAAC	17;16	1;16	YES	No
II	3651030	3651173	144	-1	SPBP8B7.10c	SPBP8B7.10c.1:exon:3-SPBP8B7.10c.1:exon:2	int_4186	22	20	2	0	0	13	1	2	A	AUUUUUAACAC	11	22	Awan_Short;Awan_Long	0	0	7.81474	8.101	1	1	-16.6096	-16.6096	GTAAGTTTTAATAAACGGAATGAGGGAAACACTTAAAAATACTATTTGTTTTGGTTTGAGACAGAATAATAATTTGTTTGATAAAAGTTCGACTGCTCATTTCGTTTCCTTGCTTTTGATAGTATTATTTTTAACACATTTTAG	UUUUAAC	UUUUAAC	11	22		NA	NA	NA	No	YES	No	NA	No	SPBP8B7.10c_intron2	UUUUAAC	9	1	YES	No
I	906145	906287	143	-1	SPAC1687.03c	SPAC1687.03c.1:exon:2-SPAC1687.03c.1:exon:1	int_1315	28	13	15	0	0	14	2	2	A;A	UAUGCUGAUCU;AUAAUAUAGUA	16;25	23;5	Awan_Short;Awan_Long	54	30	5.83767	5.91682	55	31	5.54541	5.14535	GTATGTATATATTATGAGCAATTAAAACGTCCTTTATGAAGGTTTTAGTGTTCAGCTATTACGATTGCTTCTTGGTGACTCAGGCATCTTTTCATAATTTAAAGGTTCAATATAATATAGTATGCTGATCTATAAACTTATAG	UGCUGAU	UGCUGAU	16	23	AAUAUAG	25	5	NA	No	YES	No	NA	No	NA	NA	0	0	No	No
II	1238916	1239004	89	-1	SPBC651.01c	SPBC651.01c.1:exon:3-SPBC651.01c.1:exon:2	int_3630	12	12	0	0	0	9	1	1	A	UCUACUAACGA	13	12	Awan_Short	165	93	6.92212	7.35144	6.38462	6.26667	7.79052	7.45738	GTATGTAAACATTTTCAGTTCAATTATCGTATTAGAGTGGTTGCATTGGAATTCTAGATTTGCGAATCATCTACTAACGAAAATATTAG	UACUAAC	UACUAAC	13	12		NA	NA	NA	No	YES	No	NA	No	SPBC651.01c_intron2	UACUAAC	11	1	YES	No
I	1300481	1300633	153	-1	SPAC1565.06c	SPAC1565.06c.1:exon:3-SPAC1565.06c.1:exon:2	int_1416	21	13	8	0	0	15	4	2	A;A;A;A	GUUACUAACGC;CGUACUCAGUA;AGUUACUAACG;AUCUCUAACUU	10;34;11;22	10;7;3;1	Awan_Short;Awan_Long	18	11	7.20821	7.55202	3.16667	1.33333	4.19262	3.97542	GTATGAGTTCTTTCGTTCCGATATACGTTTATGCACGTCCGGGTTGTTTTGATTTTGTTTTTAGAACCGATAACCTCTGTTCGTGGCTAAACTTCATTAGATTACTTTTTATCGTACTCAGTATATCTCTAACTTAGTTACTAACGCTTTCAG	UACUAAC	UACUAAC	10	10	UACUCAG	34	7	NA	No	YES	No	YES	No	SPAC1565.06c_intron2	UACUAAC	8	6	YES	No
I	3388780	3388912	133	1	SPAC959.02	SPAC959.02.1:exon:3-SPAC959.02.1:exon:4	int_703	4	3	1	0	0	4	1	2	A	ACAACUAACUU	9	4	Awan_Short;Awan_Long	36	11	5.40767	6.3802	18.5	12	6.39902	6.50683	GTATGTAGTTTACCTTTTTTTCGTATACAGCTGACGACCTAAACAAAGTGACAGATTCACTTTATTTGACTCGTCTAAATTTTATTATTATTATTTTTTTCTAATTAATTATCTTTTACAACTAACTTGTCAG	AACUAAC	AACUAAC	9	4		NA	NA	NA	No	YES	No	No	No	NA	NA	0	0	No	No
I	351200	351294	95	1	SPAC630.03	SPAC630.03.1:exon:3-SPAC630.03.1:exon:4	int_33	29	29	0	0	0	14	2	1	A;A	UUUACUAACUG;GAAUUUUACUA	15;19	28;1	Awan_Short	24	13	7.49213	7.90157	6.25	2.33333	7.29919	7.13587	GTATGTATAAAAAATCTAATACGAGCTTAGATAAACAGTTTTGAACATTAAATGCATATATATATGCCCGAATTTTACTAACTGATAAACCTTAG	AACUGAU	UACUAAC	15	28	AUUUUAC	19	1	NA	No	No	No	NA	No	SPAC630.03_intron3	UACUAAC	13	3	YES	No
II	1905988	1906383	396	1	SPBP16F5.04	SPBP16F5.04.1:exon:1-SPBP16F5.04.1:exon:2	int_2763	21	21	0	0	0	9	2	1	A;A	UAAAUUAACAU;AUAAAUUAACA	270;271	20;1	Awan_Short	87	64	8.7277	8.67094	22	7.22222	7.22986	7.28499	GTAAGTCCTTTACTATAAACCTGATGGAGACTGAACATGTGATTTAAGTTGTGGATAAGTATGATGTTTCGCATGTTTTATGTATCAACTACTTATTAAAAAATACGCGCTCTTTTTCATAAATTAACATTTGTTCAGCGTAAATAAAGAAAGTAACTCAATAATCCATTCGTTTAGAATGATCATTTAAGAGAAGTGCTTTTATTCATTAGTAATTGATGAATCCTTCGATTTATTGATGAGTAGGAAGAAATTTTATTTAAAAGATCTATCTAAGTTTTTTTTTGGGGGTTTGGTTTCTTTCTTTGAATCGCATGGCAGTACATCCGGGGTGTTCAAGCGCACGTTGATACGTGCTTAGTTTTATTTTTATTGGATTCTAACTTTTTTATGTAG	UUCUAAC	AAUUAAC	270	20		NA	NA	NA	No	No	No	No	No	NA	NA	0	0	No	No
II	546153	546330	178	-1	SPBC354.02c	SPBC354.02c.1:exon:6-SPBC354.02c.1:exon:5	int_3477	23	13	10	0	0	16	2	2	A;A	UAUGCUAACUU;UUAUGCUAACU	12;13	13;10	Awan_Short;Awan_Long	425	215	7.4115	7.42997	42.6	43.2	7.83334	7.12515	GTATGTTTGATTTCCAATCTACTGTAGTATGTAGCGTGGCTGCGTTTAGTTACATTTTTAATTTTGCTCATTTTCAATTCTGAAGTGGAGCTTTTGTTTTTCTTTACTTTTTGAGTCTTTCAGCCGTAAACGTTACTTAATTTTTTTTTTCGAAAGGCTTATGCTAACTTTAATTTAG	UGCUAAC	UGCUAAC	12	13		NA	NA	NA	No	YES	No	NA	No	SPBC354.02c_intron5	UGCUAAC	10	1	YES	No
II	617969	618062	94	-1	SPBC839.09c	SPBC839.09c.1:exon:2-SPBC839.09c.1:exon:1	int_3498	6	6	0	0	0	5	2	1	A;A	GUCUGCUAAUA;UCUGCUAAUAC	20;19	4;2	Awan_Short	25	15	5.43561	6.0196	3.71429	8	3.70058	3.55182	GTACGAAGAAAATCCATTGAAGTTGCTATTGTCTTTCAAGAATATGATTTTCGATTGTTGGATTATTGTCTGCTAATACTTTATTGATATTTAG	UGCUAAU	UGCUAAU	19	2		NA	NA	NA	No	YES	No	No	No	NA	NA	0	0	No	No
I	5301380	5301456	77	1	SPAC11E3.10	SPAC11E3.10.1:exon:4-SPAC11E3.10.1:exon:5	int_1097	2	2	0	0	0	2	2	1	A;A	UUUGCUAAUGC;UUUUGCUAAUG	12;13	1;1	Awan_Short	23	20	1.69367	2.57044	24	21	4.99216	5.08234	GTAAGTATTTAATGTTTTCCGCTGCAGCAAAGCACGATGGAAGTGATTTTTTGGTAATTTTGCTAATGCTATGCCAG	UGCUAAU	UGCUAAU	12	1		NA	NA	NA	No	YES	No	NA	No	NA	NA	0	0	No	No
I	4393573	4393717	145	-1	SPAC30.02c	SPAC30.02c.1:exon:2-SPAC30.02c.1:exon:1	int_2137	48	25	23	0	0	28	3	2	A;A;A	GUAACUAAUUU;GGUAACUAAUU;UCUGGUAACUA	11;12;15	41;5;2	Awan_Short;Awan_Long	3	7	6.17286	6.20164	4	2.66667	5.44978	5.57027	GTATGTTTAAATAGTTATCTTTAATGATTTAGTTTTTGGAAATTAGCCAATTCATTTTTGGCTTCAGATTGTGCCCAGCTACTCTAGATGATGGGAGAATCCGTATATGCAATTTTTCGTAATTCTGGTAACTAATTTGTCTTAG	AACUAAU	AACUAAU	11	41	UGGUAAC	15	2	NA	No	YES	No	NA	No	SPAC30.02c_intron1	AACUAAU	9	3	YES	No
I	304536	304673	138	1	SPAC18B11.08c	SPAC18B11.08c.1:exon:1-SPAC18B11.08c.1:exon:2	int_18	36	35	1	0	0	15	2	2	A;A	UUUGCUAACCC;GUUUGCUAACC	12;13	29;7	Awan_Short;Awan_Long	7	8	6.91442	6.95109	1.33333	2.25	6.94442	6.95862	GTAAAGTAGAAAGCACTTTCAAATTGAACCCAATCGTGAGTTACGCTGATTTAATCGCTCAAGCTTTAGTTCATTGTGGAATATTTTAAATCCTTTCTTTCGTCAAATAATTTATTAAGTTTGCTAACCCTATTATAG	UGCUAAC	UGCUAAC	12	29		NA	NA	NA	No	YES	No	No	No	SPAC18B11.08c_intron1	UGCUAAC	10	2	YES	No
II	1384739	1384829	91	-1	SPBC8D2.14c	SPBC8D2.14c.1:exon:2-SPBC8D2.14c.1:exon:1	int_3659	11	11	0	0	0	8	2	1	A;A	AUGGCUAACAU;AUUGGGCAUAG	12;69	10;1	Awan_Short	58	65	5.4824	5.61894	59	13.2	5.57731	5.35401	GTAAGTATTTAGCTTATTGGGCATAGTCACAAACGAACGTTGCCTAAGTCTTTTCAAATCAAATGGTTAAGTATGGCTAACATTTCTTTAG	GGCUAAC	GGCUAAC	12	10	UGGGCAU	69	1	NA	No	YES	No	NA	No	NA	NA	0	0	No	No
I	3413296	3413368	73	-1	SPAC3H5.11	SPAC3H5.11.1:exon:4-SPAC3H5.11.1:exon:3	int_1905	26	26	0	0	0	15	2	1	A;A	UUAUCUAACAU;UUUAUCUAACA	12;13	19;7	Awan_Short	26	22	1.50759	2.06244	27	11.5	3.35918	3.32907	GTAAGTTAATGAAATAGTGCTCCGCTTCAGATGTTTTCTATAAAATATGTTTTTTTATCTAACATTTTCTTAG	AUCUAAC	AUCUAAC	12	19		NA	NA	NA	No	YES	No	NA	No	SPAC3H5.11_intron3	AUCUAAC	10	7	YES	No
III	927625	927732	108	1	SPCC24B10.15	SPCC24B10.15.1:five_prime_UTR:1-SPCC24B10.15.1:exon:1	int_4571	21	21	0	0	0	15	2	1	A;A	UUGGCUAAUAU;UUUGGCUAAUA	16;17	16;5	Awan_Short	4	4	1.6206	0.497384	5	5	3.12272	2.94741	GTATGTAATATTTTTTAAGCGTTCATGCACAGTGTACGCAGGTAATTGCTTTGTTTATATGCACACATGCAATATAATAATACATTTGGCTAATATATACAAAATTAG	GGCUAAU	GGCUAAU	16	16		NA	NA	NA	No	YES	No	NA	No	SPCC24B10.15_intron1	GGCUAAU	14	1	YES	No
I	1422072	1422179	108	1	SPAC3A12.02	SPAC3A12.02.1:exon:1-SPAC3A12.02.1:exon:2	int_321	11	11	0	0	0	8	2	1	A;A	AGCACUAACAA;CAGCACUAACA	18;19	10;1	Awan_Short	10	5	4.20556	3.71977	11	2	3.73868	3.65023	GTGTGTATAGTAACTCATTGAATTTTGAGGTTTTTGTTGCCAATTAGTTATATATCCTTTTCATTATCGCTGCGGAGTATGACAGCACTAACAATTTTTTTCAACTAG	CACUAAC	CACUAAC	18	10		NA	NA	NA	No	YES	No	NA	No	SPAC3A12.02_intron1	CACUAAC	16	1	YES	No
I	3344909	3345030	122	1	SPAC26A3.06	SPAC26A3.06.1:exon:2-SPAC26A3.06.1:exon:3	int_688	49	38	11	0	0	29	4	2	A;A;A;A	AAGACUAACGA;UAAGACUAACG;AUUUAAGACUA;AAAUUUAAGAC	13;14;17;19	44;3;1;1	Awan_Short;Awan_Long	25	15	5.23916	5.30642	4.33333	3.2	4.77141	4.32626	GTAAGTAAAAAACTGTTTTCCAAGCTGTTAATAATCATATGAGTATATATTTTGAGAGAAAACTTTTCTCAATGTTCTGATCATGTGAAAAAAGTTAAATTTAAGACTAACGATCAATTCAG	GACUAAC	GACUAAC	13	44	AUUUAAG	19	1	NA	No	YES	No	YES	No	SPAC26A3.06_intron2	GACUAAC	11	10	YES	No
II	4128412	4128491	80	-1	SPBC1861.01c	SPBC1861.01c.1:exon:2-SPBC1861.01c.1:exon:1	int_4291	1	1	0	0	0	1	1	1	A	UUUACUAAAAA	18	1	Awan_Short	23	17	3.57712	2.8048	24	18	6.14896	6.13735	GTACGTTCGCGAATTGGGTTCCATATATCGTAATAATTATTCTTTTTTTAATAAATTTACTAAAAAATATTTTTATCTAG	UUUUAAU	UACUAAA	18	1		NA	NA	NA	No	No	No	NA	No	SPBC1861.01c_intron1	UACUAAA	16	1	YES	No
I	1194408	1194519	112	-1	SPAC4C5.02c	SPAC4C5.02c.1:exon:4-SPAC4C5.02c.1:exon:3	int_1393	2	2	0	0	0	2	2	1	A;A	UAUGCUAACGG;UUAUGCUAACG	12;13	1;1	Awan_Short	14	15	4.69741	5.08876	7.5	8	4.69058	4.5115	GTATGACACTCCAGCTAACAGAGATTCAGCATTTACAATGCGACATCTCTTCATTCATAATTCCAAAGCTATATTTTGGTTTTTGATGGTTCTTATGCTAACGGTGGTTTAG	UGCUAAC	UGCUAAC	12	1		NA	NA	NA	No	YES	No	NA	No	NA	NA	0	0	No	No
II	401684	401843	160	-1	SPBC106.12c	SPBC106.12c.1:exon:5-SPBC106.12c.1:exon:4	int_3428	11	8	3	0	0	10	2	2	A;A	UAAACUAACCU;UUAAUAAACUA	13;17	10;1	Awan_Short;Awan_Long	30	30	6.85446	7.06647	31	31	2.94664	3.44491	GTAAGTGATATATGTTTACTATGTTTTCAAAAGCCTCGCTTTTAGTTTTCGATTGAAGATTATGAAACGAACCTGACAAAAAATCTCCCTGTCAAGCTAAGTAGAGCTTTGTTCCGATTTCGAATCGCTTTTTTTATTAATAAACTAACCTTTTCTTAAG	AACUAAC	AACUAAC	13	10	AAUAAAC	17	1	NA	No	YES	No	YES	No	SPBC106.12c_intron4	AACUAAC	11	3	YES	No
II	1537966	1538087	122	1	SPBC83.15	SPBC83.15.1:exon:4-SPBC83.15.1:exon:5	int_2693	47	47	0	0	0	29	2	1	A;A	CAUAUUGACCA;AGCACUCAUAU	11;17	46;1	Awan_Short	9	8	3.08861	2.64345	5	9	2.84824	3.22252	GTATGTTTTATCGATTTTTTGCAAATCAAAGGCATTATGGTAATAAATAAATTGAATATTTCCAAAGCCATTTAAAGATTTTTTTCTCTTTTCTTTCTAGCACTCATATTGACCAAATTTAG	UAUUGAC	UAUUGAC	11	46	CACUCAU	17	1	NA	No	YES	No	NA	No	SPBC83.15_intron4	CACUCAU;UAUUGAC	15;9	1;12	YES	No
II	3684929	3685094	166	-1	SPBP8B7.24c	SPBP8B7.24c.1:exon:3-SPBP8B7.24c.1:exon:2	int_4194	29	23	6	0	0	17	2	2	A;A	ACUGCUAACUU;AACUGCUAACU	9;10	27;2	Awan_Short;Awan_Long	28	26	8.40239	8.54256	2.9	3.85714	5.49679	5.7473	GTAAGTAGAGTCTGGTGGTCAAAGAGAACAGGTTTCAGAGCAAAATAGTGGTGAATTGAACAACACCCATTGTTTTTGTCATCAAAAGTGAATCCATTGTTACAAGTCTGACCTTTTTCTTTCAAAAATACAAATTACGTTTTAAACTTAACTGCTAACTTAACAG	UGCUAAC	UGCUAAC	9	27		NA	NA	NA	No	YES	No	NA	No	SPBP8B7.24c_intron2	UGCUAAC	7	13	YES	No
II	489988	490077	90	1	SPBC902.04	SPBC902.04.1:exon:2-SPBC902.04.1:exon:3	int_2427	8	8	0	0	0	6	1	1	A	UAUGCUAACGA	13	8	Awan_Short	8	10	1.69099	0.175458	2.25	3.66667	3.12756	3.7413	GTATGTAATTTTTTTTGAGTTGCCAATTTGCGTGATTTTTTTTTTTACACGCTAAAAAATTGTTTATCAATATGCTAACGAAATGACTAG	UGCUAAC	UGCUAAC	13	8		NA	NA	NA	No	YES	No	NA	No	SPBC902.04_intron2	UGCUAAC	11	1	YES	No
II	4235544	4235632	89	-1	SPBC16G5.12c	SPBC16G5.12c.1:exon:3-SPBC16G5.12c.1:exon:2	int_4308	14	14	0	0	0	9	2	1	A;A	AAUGCUAACUA;AAAUGCUAACU	12;13	12;2	Awan_Short	16	5	1.48472	1.19157	3.4	6	4.4272	3.77872	GTAAGTTATAAACATCTTAGCGTTTTAAAAAGCAGATATTTATTTATTACAGAAAAAACCCTTCAAGATAAATGCTAACTAATTTTCAG	AACUAAU	UGCUAAC	12	12		NA	NA	NA	No	No	No	No	No	SPBC16G5.12c_intron2	UGCUAAC	10	1	YES	No
I	5299126	5299230	105	1	SPAC11E3.09	SPAC11E3.09.1:exon:1-SPAC11E3.09.1:exon:2	int_1093	59	59	0	0	0	19	2	1	A;A	AUUACUAACUU;AAUUACUAACU	24;25	51;8	Awan_Short	26	23	4.12067	3.81103	5.4	8	4.41186	4.40549	GTTAGGAATAAAAAGAAATTGCGGGATTGTAAACGGCTTTGGCCTTTTTTCTTTTCATCATTTTTTGTAACATAATTACTAACTTAGTCTTCTTTATTTATATAG	UACUAAC	UACUAAC	24	51		NA	NA	NA	No	YES	No	No	No	SPAC11E3.09_intron1	UUACUAA;UACUAAC	23;22	1;44	YES	No
I	2445969	2446051	83	1	SPAC32A11.01	SPAC32A11.01.1:exon:2-SPAC32A11.01.1:exon:3	int_531	12	12	0	0	0	9	2	1	A;A	GUUCUUAACCU;UAACCUAAAUG	14;9	11;1	Awan_Short	0	1	4.358	5.31463	0.5	0.5	2.76114	2.90293	GTAAGTCTTGTGTTTTCTGAAATTATGGTACCTCACATGGTATCAAAATCTTCTCTGGTTTTGTTCTTAACCTAAATGTATAG	UCUUAAC	UCUUAAC	14	11	ACCUAAA	9	1	NA	YES	YES	No	NA	No	SPAC32A11.01_intron2	UCUUAAC	12	3	YES	No
I	2041296	2041445	150	-1	SPAC607.03c	SPAC607.03c.1:exon:2-SPAC607.03c.1:exon:1	int_1601	91	22	69	0	0	39	3	2	A;A;A	CAUACUAACAU;GCAUACUAACA;AUUGCAUACUA	10;11;14	80;10;1	Awan_Short;Awan_Long	120	92	8.31534	8.5153	121	93	8.13424	8.03045	GTATGTTAATAATGGTATAAGACTTCTTCTTTGGCTACGAAATAGCTGAAAGCATGCTAGTTTCAAATGCTAGTTTCGTCGGCAATTTTATTACGGAAAATGAACTTTTCCGAAATTTATATTCGTTTTATTGCATACTAACATTGTTAG	UACUAAC	UACUAAC	10	80	UGCAUAC	14	1	NA	No	YES	No	NA	No	SPAC607.03c_intron1	UACUAAC	8	1	YES	No
II	632434	632615	182	-1	SPBC839.17c	SPBC839.17c.1:exon:2-SPBC839.17c.1:exon:1	int_3504	19	19	0	0	0	15	2	1	A;A	AAUUCUAACCU;AAAUUCUAACC	13;14	16;3	Awan_Short	97	105	7.44134	7.53237	4.66667	8.83333	8.61487	8.70309	GTAAGTGTTGAAAAAATCGGTAATTTCTTTTGAATCTACAAATATCTTCTCTGGTTATGTTTGTAAACAATTCATCCGTGTTAGTCGGTTCACCACTGATTTGCATTTCCTTAATTTGTCACATTCCTGATGTCCTTGTCTCTACATTATTCCTTTCATACAAATTCTAACCTTTAAAAAAG	UUCUAAC	UUCUAAC	13	16		NA	NA	NA	No	YES	No	NA	No	SPBC839.17c_intron1	UUCUAAC	11	9	YES	No
II	1839710	1839846	137	1	SPBC28E12.03	SPBC28E12.03.1:exon:1-SPBC28E12.03.1:exon:2	int_2754	59	49	10	0	0	38	5	2	A;A;A;A;A	UUUACUAACUU;UUUUCCCAGCU;AUUUACUAACU;GAACGGCAUUU;GGCAUUUACUA	13;37;14;21;17	43;7;6;2;1	Awan_Short;Awan_Long	21	8	7.90316	8.22211	0.956522	0.5625	3.70488	3.1354	GTATGTGAGGTTCAAAATTTAATCGCCGTGTCCGGAGAGCGGTCTTTTCACAAAACGAGACCCTGTCTTGAAATTGGACACTGCTCTTTTATTTTTTCCCAGCTGTAATGAACGGCATTTACTAACTTTTGCTCTAG	UACUAAC	UACUAAC	13	43	UUCCCAG	37	7	NA	No	YES	No	NA	No	SPBC28E12.03_intron1	UACUAAC	11	15	YES	No
II	3227272	3227353	82	-1	SPBC21.07c	SPBC21.07c.1:exon:2-SPBC21.07c.1:exon:1	int_4064	8	8	0	0	0	6	1	1	A	CGUACUAAUAG	16	8	Awan_Short	2	1	1.82529	2.47967	3	2	2.93254	3.1131	GTAAGTCTTATGTGTATAAATTGTGTAGCAAGACGAGCTCTATCCTATTTCAAAAACGACGTACTAATAGTTCAATTGATAG	UACUAAU	UACUAAU	16	8		NA	NA	NA	No	YES	No	No	No	SPBC21.07c_intron1	UACUAAU	14	2	YES	No
II	4086056	4086150	95	-1	SPBC1347.13c	SPBC1347.13c.1:exon:2-SPBC1347.13c.1:exon:1	int_4284	27	27	0	0	0	19	3	1	A;A;A	CUCACUAACAU;UCUCACUAACA;UAUUCUCACUA	9;10;13	22;3;2	Awan_Short	6	4	3.32919	3.41937	3.5	1.66667	5.7204	5.63536	GTACGTTTTCTGAGAATTTTTGTGGTCCATAACCCTTTACGATTTTACAAGACACCGAAAATGCACTTGTGTTTGTATTCTCACTAACATGTTAG	CACUAAC	CACUAAC	9	22	UUCUCAC	13	2	NA	No	YES	No	NA	No	SPBC1347.13c_intron1	CACUAAC;UUCUCAC	7;11	5;1	YES	No
I	3087277	3087383	107	1	SPAC16A10.04	SPAC16A10.04.1:exon:3-SPAC16A10.04.1:exon:4	int_644	10	10	0	0	0	7	2	1	A;A	AUUUCUAACAU;GAUUUCUAACA	12;13	8;2	Awan_Short	53	44	5.07696	5.75872	6.75	7.5	5.70354	5.72742	GTATGCCAATAGATCGAACAATAACTGTTTAAGTGCAGTGTTCATATGATTCATGTACTCAGTTCACTTGAATTATCTAAGTATACTGATTTCTAACATCATGCTAG	UUCUAAC	UUCUAAC	12	8		NA	NA	NA	No	YES	No	No	No	SPAC16A10.04_intron3	UUCUAAC	10	3	YES	No
III	757762	757850	89	1	SPCC1020.11c	SPCC1020.11c.1:exon:2-SPCC1020.11c.1:exon:3	int_4539	11	11	0	0	0	11	2	1	A;A	CACGCUAACUA;ACACGCUAACU	13;14	10;1	Awan_Short	2	0	4.35918	4.97293	1.5	0.5	3.04791	3.75476	GTAAGAAACTTGCTCGATCGTTGCTATTTTATTTTGTTTGAATAGTCAGATCTCGCATTGAAACAATTACACGCTAACTAAGTCATTAG	CGCUAAC	CGCUAAC	13	10		NA	NA	NA	No	YES	No	NA	No	SPCC1020.11c_intron2	CGCUAAC	11	4	YES	No
II	1348623	1348800	178	1	SPBC27B12.14	SPBC27B12.14.1:exon:2-SPBC27B12.14.1:exon:3	int_2633	8	8	0	0	0	7	2	1	A;A	GAAACUGACUU;UGCCACAAAAG	11;107	6;2	Awan_Short	35	39	5.88275	5.58388	7.2	4	6.31987	6.57984	GTAAGTATACATAGCGAATCTTTTTTAAAACTGTTTGCTCCAGGTTCTGAAGTGGGTTTGGGGGTGCCACAAAAGAGAGAATATTAAGTCTTCCTTAATATTTCCCTTTACCTTCTTCAAACGTGGTGTTTGCTTTCAATGGTTTTTGTTCGTATTCTATGAAACTGACTTTGAGTAG	AACUGAC	AACUGAC	11	6	CCACAAA	107	2	NA	No	YES	No	NA	No	SPBC27B12.14_intron2	AACUGAC	9	1	YES	No
II	604578	604732	155	-1	SPBC839.19	SPBC839.19.1:exon:2-SPBC839.19.1:exon:1	int_3496	4	1	3	0	0	2	1	2	A	UUCACUAACCA	13	4	Awan_Short;Awan_Long	16	5	4.81361	4.88303	17	6	2.67888	1.92007	GTAAGTTGTTTTAACTTATCGTTCCTTATATAAACACATAAGCACCTGGTTTGTTGTTGGTTGATCATACATGTGGAAATTTTTTATTTGTTTACTGATTTTCGGAACGAAAATTTAATTTTCTCCACACATTAATTCACTAACCATCACAACAG	CACUAAC	CACUAAC	13	4		NA	NA	NA	No	YES	No	No	No	NA	NA	0	0	No	No
II	2959928	2960018	91	-1	SPBC2A9.07c	SPBC2A9.07c.1:exon:2-SPBC2A9.07c.1:exon:1	int_3987	14	14	0	0	0	10	1	1	A	AUUUCUAACGA	10	14	Awan_Short	4	4	2.45266	1.74447	5	5	4.00783	4.24989	GTATGTGTTAATATGACACGTATATTTACGAGCATTTCAATGGATTCGCTTTAATAATTTATACATTAAATCCAATTTCTAACGATTGCAG	UUCUAAC	UUCUAAC	10	14		NA	NA	NA	No	YES	No	NA	No	SPBC2A9.07c_intron1	UUCUAAC	8	6	YES	No
III	2385105	2385181	77	-1	SPCC1827.05c	SPCC1827.05c.1:exon:3-SPCC1827.05c.1:exon:2	int_5346	16	16	0	0	0	13	2	1	A;A	ACUGCUAACUU;GACUGCUAACU	14;15	11;5	Awan_Short	63	32	4.1087	4.68591	12.8	33	4.71556	3.94848	GTATGGTAACATTTATTATCTACAGCGGACTATTTTAGTTCTTCTTTTTATTTTCGACTGCTAACTTTTTGCATTAG	UGCUAAC	UGCUAAC	14	11		NA	NA	NA	No	YES	No	NA	No	SPCC1827.05c_intron2	UGCUAAC	12	6	YES	No
I	4522677	4522754	78	-1	SPAC27D7.08c	SPAC27D7.08c.1:exon:3-SPAC27D7.08c.1:exon:2	int_2173	30	30	0	0	0	19	2	1	A;A	AAUGCUAAUUC;AAAUGCUAAUU	12;13	27;3	Awan_Short	16	13	2.41201	1.3819	1.54545	2.8	4.80006	4.65577	GTAAGAGATGTGTAGCATCACCAATGTTTCTTTTAAACAAACATTTCCCTTCTCTCATAAATGCTAATTCATTTAAAG	UGCUAAU	UGCUAAU	12	27		NA	NA	NA	No	YES	No	No	No	SPAC27D7.08c_intron2	UGCUAAU	10	10	YES	No
I	5373332	5373411	80	-1	SPAC4D7.14	SPAC4D7.14.1:exon:2-SPAC4D7.14.1:exon:1	int_2349	23	23	0	0	0	16	3	1	A;A;A	GUAACUAACUA;UCAUUGAAGUA;AGUAACUAACU	14;22;15	16;5;2	Awan_Short	26	28	3.14102	3.04581	4.5	7.25	5.0695	5.08234	GTAATGAATCTGACAAAAATAAATGAAACCCAGATTTTACATTATTGAGAATCATTGAAGTAACTAACTATTTTTTTTAG	AACUAAC	AACUAAC	14	16	AUUGAAG	22	5	NA	No	YES	No	NA	No	SPAC4D7.14_intron1	AACUAAC	12	2	YES	No
I	2357469	2357575	107	1	SPAC17G8.09	SPAC17G8.09.1:exon:1-SPAC17G8.09.1:exon:2	int_507	30	30	0	0	0	21	2	1	A;A	CAUACUAACAU;CCAUACUAACA	12;13	26;4	Awan_Short	11	6	4.56476	4.65375	12	7	3.48363	2.53152	GTAGGGTCATCGATAGTTTCCTCAAAAATTAAACTATCACTATTTTTTTTAACTATCATAATGATACCAATGTCACTCACTCTTTTGCCATACTAACATCGCCTCAG	UACUAAC	UACUAAC	12	26		NA	NA	NA	No	YES	No	NA	No	SPAC17G8.09_intron1	UACUAAC	10	6	YES	No
III	1693417	1693515	99	-1	SPCC417.09c	SPCC417.09c.1:exon:3-SPCC417.09c.1:exon:2	int_5193	22	22	0	0	0	17	2	1	A;A	UUUACUAACCC;CUUUACUAACC	18;19	19;3	Awan_Short	7	4	3.74613	4.6818	4	2.5	3.7239	3.40906	GTATGTATTGATGGATTCATCTACTTCATTTCATACCCTTGCTATGTTGTGGGGCATCATCGATTTTACTGTTCTTTACTAACCCGTTTTTCTCAATAG	UACUAAC	UACUAAC	18	19		NA	NA	NA	No	YES	No	NA	No	SPCC417.09c_intron2	UACUAAC	16	11	YES	No
I	2371966	2372102	137	1	SPAC22H10.02	SPAC22H10.02.1:exon:2-SPAC22H10.02.1:exon:3	int_510	87	67	20	0	0	41	3	2	A;A;A	CGUACUAACUU;GCGUACUAACU;CGUGCGUACUA	15;16;19	77;9;1	Awan_Short;Awan_Long	4	1	4.96395	4.94431	5	2	3.29207	3.77653	GTAGGTTTTAAAACAAATTGAAAATTATGTTCCTGAGTCAAGCCTGAAGTGCTCATTGCCATTACATTTCTGTTTTGTACCATATACTTTTTATTCATAGAGGAATAAAAGCGTGCGTACTAACTTTATTGGTTTAG	UACUAAC	UACUAAC	15	77	UGCGUAC	19	1	NA	No	YES	No	YES	No	SPAC22H10.02_intron2	GUACUAA;UACUAAC	14;13	1;14	YES	No
II	428548	428633	86	-1	SPBC582.05c	SPBC582.05c.1:exon:3-SPBC582.05c.1:exon:2	int_3440	13	13	0	0	0	12	2	1	A;A	CACGCUAACUG;ACACGCUAACU	11;12	11;2	Awan_Short	0	0	3.40865	3.70047	0.25	0.5	-1.41889	1.19482	GTATGTTCTTGAGTCTATTCATGCTATTACCTTATAACTTACTGAATTATTGGTTTTACAGGGGAATACACGCTAACTGTCGCTAG	CGCUAAC	CGCUAAC	11	11		NA	NA	NA	No	YES	No	NA	No	SPBC582.05c_intron2	CGCUAAC	9	2	YES	No
I	3899154	3899256	103	-1	SPAC926.08c	SPAC926.08c.1:exon:3-SPAC926.08c.1:exon:2	int_2024	1	1	0	0	0	1	1	1	A	UUAACUAACGU	17	1	Awan_Short	125	82	3.93691	3.73569	18	11.8571	7.17134	6.85493	GTAAGTTCTTGACAACCTTAAAAGAAAAGGGGAAATGCAAAAAAATTTTGTAACTCCTTCAATATATAAAACATTTAATTTAACTAACGTGTTTATTGTTCAG	AACUAAC	AACUAAC	17	1		NA	NA	NA	No	YES	No	NA	No	SPAC926.08c_intron2	AACUAAC	15	1	YES	No
I	782337	782437	101	-1	SPAC4G8.11c	SPAC4G8.11c.1:exon:3-SPAC4G8.11c.1:exon:2	int_1286	4	4	0	0	0	4	2	1	A;A	UUUGCUAACUA;UUUUGCUAACU	8;9	3;1	Awan_Short	0	2	2.62417	2.46852	0.2	0.5	2.06737	1.8976	GTAAGTAGACGCATTATTTGTCCAAGCTGCTCACAAGTTTGTTCGCTTGATAAGATAGATTTATTTACTTCCAAAATTTATAACCTTTTGCTAACTAGCAG	UGCUAAC	UGCUAAC	8	3		NA	NA	NA	No	YES	No	NA	No	NA	NA	0	0	No	No
III	1441671	1441782	112	-1	SPCC61.01c	SPCC61.01c.1:exon:2-SPCC61.01c.1:exon:1	int_5146	3	3	0	0	0	3	1	1	A	CAAGCUAACAC	21	3	Awan_Short	2	2	3.96045	4.38351	1.5	0.6	3.5585	3.49417	GTATGTTAGTATTGTAGTCATGATAATCCATAAATCACGTAGTGTTTGCATACATCTGTTGAATGTTTGTGTTTGTGGTATGATCAAGCTAACACAATGTCTTCTCTTTTAG	AGCUAAC	AGCUAAC	21	3		NA	NA	NA	No	YES	No	NA	No	SPCC61.01c_intron1	AGCUAAC	19	2	YES	No
II	2320418	2320546	129	1	SPBC24C6.02	SPBC24C6.02.1:exon:1-SPBC24C6.02.1:exon:2	int_2860	19	14	5	0	0	12	4	2	A;A;A;A	AGCACUAACAU;AAGCACUAACA;CAAAUCAACAA;UUGUCAAAUCA	11;12;28;32	14;3;1;1	Awan_Short;Awan_Long	45	31	5.41954	5.53871	9.2	6.4	5.1054	4.55767	GTAAGTTTTCAATTCTAAAATAAAAATTTTAGGTTCTGCTACATGTTTAACCTGTTCAAAAATTTTTATTATCTAAATGATACCAGGATTTTGTCAAATCAACAATTTACAAGCACTAACATAAACTAG	CACUAAC	CACUAAC	11	14	GUCAAAU	32	1	NA	No	YES	No	YES	No	SPBC24C6.02_intron1	CACUAAC	9	1	YES	No
I	3534739	3534876	138	-1	SPAC16E8.18c	SPAC16E8.18c.1:exon:2-SPAC16E8.18c.1:exon:1	int_1949	5	5	0	0	0	4	2	1	A;A	UUUACUAAUGA;UUUGUUAAUGA	10;37	4;1	Awan_Short	7	6	7.1404	7.67252	0.8	3.5	4.68007	4.46394	GTAAGATTATAAATTCGTTGGGCGAATTTGTTGCTTTTCTCCCAACTGTTGAAAACACTCATTATCTGCTACTTATGTCCTATGAAACATCTATTTTGTTAATGATTCCTTTTTATTAAAGTTTACTAATGATATTAG	UACUAAU	UACUAAU	10	4	UGUUAAU	37	1	NA	No	YES	No	NA	No	SPAC16E8.18c_intron1	UACUAAU	8	2	YES	No
I	509486	509562	77	-1	SPAC227.07c	SPAC227.07c.1:exon:3-SPAC227.07c.1:exon:2	int_1224	8	8	0	0	0	6	2	1	A;A	AUGACUAACAA;AAUGACUAACA	10;11	5;3	Awan_Short	88	106	4.89006	5.20787	12.7143	11.8889	6.47736	7.03767	GTATTGGTTTTGAGTAGTTCTCTCATAAAAGAGTTCTCTTTTACTTTAATCACTGAATAAATGACTAACAAGTTTAG	GACUAAC	GACUAAC	10	5		NA	NA	NA	No	YES	No	NA	No	SPAC227.07c_intron2	GACUAAC	8	1	YES	No
I	4423191	4423306	116	1	SPAC16.01	SPAC16.01.1:exon:2-SPAC16.01.1:exon:3	int_887	42	42	0	0	0	27	2	1	A;A	UUUACUAACUU;AUUUACUAACU	15;16	34;8	Awan_Short	0	0	4.82128	5.36391	0.166667	0.25	2.77215	2.82295	GTAAGTACAGATGTCATAAAAGTGAGCTTTGGCTTATCGCATATTGCACGATACGCAAATACTTATTGTCTTTTCTACCTTATTTATTTATTTATTTACTAACTTACTGGCGATAG	UACUAAC	UACUAAC	15	34		NA	NA	NA	No	YES	No	No	No	NA	NA	0	0	No	No
I	1653607	1653723	117	-1	SPAC343.08c	SPAC343.08c.1:exon:2-SPAC343.08c.1:exon:1	int_1517	11	11	0	0	0	9	2	1	A;A	UGAACUAAUAA;AUGAACUAAUA	10;11	10;1	Awan_Short	9	12	6.19162	6.61711	10	6.5	4.43736	4.46394	GTAAGTTAGCGGTAATACCTCGTTTTTGCTTTTTGAAGAACCACAAAGCGATAGTCATTATCTCATTACTTTCTAGATACTGTTTTACAATTTGAATTCATGAACTAATAAATTTAG	AACUAAU	AACUAAU	10	10		NA	NA	NA	No	YES	No	NA	No	SPAC343.08c_intron1	AACUAAU	8	2	YES	No
II	2935313	2935430	118	1	SPBC1703.11	SPBC1703.11.1:exon:2-SPBC1703.11.1:exon:3	int_2998	32	32	0	0	0	17	2	1	A;A	CUUGCUAACAA;UCUUGCUAACA	11;12	31;1	Awan_Short	5	7	6.43536	6.52612	1.5	2.66667	4.62629	4.59234	GTATGAAAATTAATACGATTTGACGTACTTCCTCTCCACAATGCTTAATACGGCACATTGTGAAGGAGCTACGAAATCCAACTTGTCACAATGTTCTTCTCTTGCTAACAATTTACAG	UGCUAAC	UGCUAAC	11	31		NA	NA	NA	No	YES	No	NA	No	SPBC1703.11_intron2	UGCUAAC	9	1	YES	No
I	2765707	2765803	97	-1	SPAC6F6.16c	SPAC6F6.16c.1:exon:2-SPAC6F6.16c.1:exon:1	int_1777	15	15	0	0	0	12	3	1	A;A;A	AUUACUAAAUA;CAUUACUAAAU;UUACUAAAUAC	13;14;12	10;4;1	Awan_Short	29	27	4.20184	4.38931	1.03448	1.21739	4.66868	4.70738	GTAAGTCAATTTTGTTAATGGGAGATACAGCAACCTGCTATTATTTGATTCTTCTCTTATAAATTTTTGGATGAACCATTACTAAATACATGAGTAG	AUUUGAU	ACUAAAU	12	1		NA	NA	NA	No	No	No	NA	No	SPAC6F6.16c_intron1	ACUAAAU	10	1	YES	No
III	1832743	1832913	171	1	SPCC285.17	SPCC285.17.1:exon:3-SPCC285.17.1:exon:4	int_4740	9	7	2	0	0	9	2	2	A;A	UAAGCUAACUU;GAAGCUAAGCU	13;18	7;2	Awan_Short;Awan_Long	136	79	7.30193	7.29929	68.5	20	6.64651	6.34537	GTAAGTTAATCATGGATGGGTTCACAATTGTTTTAAGGAGGTTTGTCAACAAACTTTTACTTTGTCGATTGTAACTTTCCTTGTCTACTTTTTTCATTTGGTTACTTGTGGAAAACATTCCGCATTGCTCTTTGTTACCTGCTGCCGAAGCTAAGCTAACTTAATTAATAG	AGCUAAC	AGCUAAC	13	7	AGCUAAG	18	2	NA	No	YES	No	NA	No	SPCC285.17_intron3	AGCUAAG	16	1	YES	No
III	144436	144588	153	1	SPCC320.11c	SPCC320.11c.1:exon:1-SPCC320.11c.1:exon:2	int_4380	4	2	2	0	0	4	1	2	A	GUUACUGACUA	14	4	Awan_Short;Awan_Long	85	39	4.92545	4.80223	8.6	13.3333	5.9313	5.44971	GTAAGTTCATTGCACTATTTCATTGTGTTTGGAATATTTCATTCCATCGAGTTTCTTATAAAGTGTTGGGATTACTTTTTACTTCTAATACTCTACAAGAAATATTTATGTTATTTTCTACGTTGTAATTGCGTTACTGACTAGTAAAACTAG	UACUGAC	UACUGAC	14	4		NA	NA	NA	No	YES	No	NA	No	NA	NA	0	0	No	No
I	1043265	1043381	117	-1	SPAC23C4.09c	SPAC23C4.09c.1:exon:5-SPAC23C4.09c.1:exon:4	int_1352	8	8	0	0	0	7	2	1	A;A	GAGUUUAACUG;AAAAAAAACAU	13;45	7;1	Awan_Short	16	11	4.28648	4.84133	17	6	3.69741	4.08234	GTAAGTGCCTTACTAATTCCTTCTCTCCTTTTTTATTTCAAATTCATCTGAGGAGAGAAATATCAAAAAAAAACATCTGTTTATATTACATGGTCCAGAGTTTAACTGTTTAATTAG	UACUAAU	GUUUAAC	13	7	AAAAAAC	45	1	NA	No	No	No	NA	No	SPAC23C4.09c_intron4	GUUUAAC	11	3	YES	No
II	2592306	2592439	134	-1	SPBC2G5.07c	SPBC2G5.07c.1:exon:3-SPBC2G5.07c.1:exon:2	int_3889	37	31	6	0	0	16	2	2	A;A	UUUACUAACUA;AUUUACUAACU	13;14	29;8	Awan_Short;Awan_Long	10	11	5.60402	5.6456	5.5	12	3.02001	3.97924	GTAAGTTTTTTTTTTTATGTTTAGGGCGAAACTTGTGTCATTATTTATGAAGGGTGCACCATCTATTTGCTAGTATACAAGAAAATATTTTCTGCTTCTCTCAAATCGATAGAATTTACTAACTATATATTTAG	UACUAAC	UACUAAC	13	29		NA	NA	NA	No	YES	No	NA	No	NA	NA	0	0	No	No
III	1299931	1300024	94	1	SPCC1322.06	SPCC1322.06.1:exon:4-SPCC1322.06.1:exon:5	int_4634	39	39	0	0	0	20	2	1	A;A	AAUACUAACUU;UAAUACUAACU	13;14	28;11	Awan_Short	27	18	1.40586	1.11272	14	19	5.14506	5.07717	GTAAGTGAATGAGAGGCTAGAAATATGTTTATTGTGTAAATGAAAAAGTTTTATTTGTTTGCTTTTGTTTTATTAATACTAACTTTTATTTTAG	UACUAAC	UACUAAC	13	28		NA	NA	NA	No	YES	No	NA	No	SPCC1322.06_intron4	UACUAAC	11	28	YES	No
II	1131824	1131978	155	-1	SPBC1709.16c	SPBC1709.16c.1:exon:2-SPBC1709.16c.1:exon:1	int_3616	16	13	3	0	0	14	4	2	A;A;A;A	AUAACUAAAAA;UAGAAUAACUA;UCGAUACAUAA;AAUAACUAAAA	12;16;42;13	11;2;2;1	Awan_Short;Awan_Long	22	19	4.40314	5.00588	7.66667	20	3.80446	3.50436	GTAAGTATATTGAATCAACAGAAATTTATATAGCAGACGCATAATATGCTGAGTTAATGGAATTTGCTGACTGACTTCATCAAACTATCTCTCAATTTCATATAACTCGATACATAAACACTTTATTGATACTAGAATAACTAAAAATTGTTTAG	GACUGAC	AACUAAA	12	11	GAAUAAC	16	2	NA	No	No	YES	NA	No	SPBC1709.16c_intron1	GAAUAAC;GAUACAU	14;40	1;2	YES	No
II	419310	419410	101	1	SPBC106.20	SPBC106.20.1:exon:5-SPBC106.20.1:exon:6	int_2417	1	1	0	0	0	1	1	1	A	UUUGCUUACUC	13	1	Awan_Short	2	4	3.47216	4.59405	0.428571	1.66667	1.16604	2.45785	GTATGTGTATTGAGGATTTGTCGATATTCATTTGCTAGTTTATCGATGTGTATATACATTTAAGTTGTTATCGTTTTTCATTTTGCTTACTCATTACGTAG	UGCUUAC	UGCUUAC	13	1		NA	NA	NA	No	YES	No	NA	No	NA	NA	0	0	No	No
I	1766189	1766336	148	-1	SPAC17A5.07c	SPAC17A5.07c.1:exon:4-SPAC17A5.07c.1:exon:3	int_1553	7	5	2	0	0	4	1	2	A	AAAACUAACUU	35	7	Awan_Short;Awan_Long	10	8	5.75849	5.78876	2.75	9	5.98689	5.81145	GTAAGTCGCAACTTTTTTGCTCTGATCCATGTGTAAAGCATGAGGAAATGCAAAATGTTTAGAACAATTCCTCTTCTTCAGTATCAATAATTGATTTTTTAAAATAAAAACTAACTTATTTTTGCCTCTTTTTGGCTACTTTGTTTAG	AACUAAC	AACUAAC	35	7		NA	NA	NA	No	YES	No	NA	No	SPAC17A5.07c_intron3	AACUAAC	33	1	YES	No
II	1074647	1074819	173	1	SPBC1734.08	SPBC1734.08.1:exon:2-SPBC1734.08.1:exon:3	int_2542	7	6	1	0	0	6	1	2	A	UUAUCUAACGU	13	7	Awan_Short;Awan_Long	70	49	7.30718	7.51344	7.88889	6.25	6.04642	5.72315	GTATGTTTGTACCACTTTTGAGGAGGAGGAAGCAATCAATTTATGATTATTCAATCTGGAACCACTGAGAATACTATTGTCTGTGCTTTACAAATTGTTTATTGTTCCTTATATCAATACACTCTATTTTAAAATGAATTGCGCAAATTTACTTTATCTAACGTTTGTTTTAG	AUCUAAC	AUCUAAC	13	7		NA	NA	NA	No	YES	No	No	No	SPBC1734.08_intron2	AUCUAAC	11	4	YES	No
I	2105047	2105243	197	-1	SPAC631.01c	SPAC631.01c.1:exon:2-SPAC631.01c.1:exon:1	int_1613	20	17	3	0	0	14	3	2	A;A;A	UCAGCUAACUU;AUCAGCUAACU;CAAUAUCAGCU	14;15;19	16;3;1	Awan_Short;Awan_Long	34	36	7.04805	6.96411	17.5	12.3333	6.54984	6.56958	GTAAGTATTACTGAAATTAATTACCTTGCCCAATTTTTTTGTTATATTTTTATTATATAGCCATCTGTAAATTCATCTTATCATTGAATGCATATTTCATCGATTTTCGTCAGTATTGCTCAGAGACTTTATGAATTTGCTTTTCACATTCTTTGTCGTTATCCTTCTTTACAATATCAGCTAACTTATTCTTTTAG	AGCUAAC	AGCUAAC	14	16	AUAUCAG	19	1	NA	No	YES	No	NA	No	SPAC631.01c_intron1	AGCUAAC	12	3	YES	No
II	3219732	3219868	137	1	SPBC21.04	SPBC21.04.1:exon:1-SPBC21.04.1:exon:2	int_3086	15	10	5	0	0	11	2	2	A;A	CCUACUAAUAU;CCCUACUAAUA	14;15	13;2	Awan_Short;Awan_Long	35	26	5.52538	5.93559	12	13.5	4.22963	4.24298	GTATGTGCACAAATGAATGTTCTTAATTTTATTTTTTGAGGATAAAAGTGATAGCTCCATTATTCTAAGTTAAAGATATACGAAGAAAACGGATCTGTAATCATTTGTATTTCAACCCTACTAATATTTATACACAG	UACUAAU	UACUAAU	14	13		NA	NA	NA	No	YES	No	NA	No	SPBC21.04_intron1	UACUAAU	12	4	YES	No
I	564465	564552	88	1	SPAC2F7.15	SPAC2F7.15.1:exon:1-SPAC2F7.15.1:exon:2	int_88	24	24	0	0	0	11	1	1	A	UUCUCUGACAA	10	24	Awan_Short	18	22	4.23798	4.49327	6.33333	4.6	4.49631	4.33214	GTAAGTTTACTGGGTAGTTTTACCTTAGGAATTCTATTTCACAATCACTTTAATATGCTTAATGTTCCATTTTCTCTGACAATTATAG	CUCUGAC	CUCUGAC	10	24		NA	NA	NA	No	YES	No	NA	No	SPAC2F7.15_intron1	CUCUGAC	8	3	YES	No
II	468610	468798	189	-1	SPBC428.12c	SPBC428.12c.1:exon:2-SPBC428.12c.1:exon:1	int_3455	10	1	9	0	0	3	1	2	A	UUUGCUAACUU	13	10	Awan_Short;Awan_Long	16	27	7.08471	7.06216	17	28	5.85702	6.1292	GTAAGGATCAATGAATTCATCGTTGTTATGATATATCTATGAGTTTCATGATACCGCTTCCTCATATGGCCATTTATCTACGATAAATGTTTGAGGTTATGATTTAACTTGTTGAATATTATATGACGGCGATACTTCGTTTTAAAAGATTGTTGTTTTCAAAGATCTGTTTGCTAACTTTCTTTTTAG	UGCUAAC	UGCUAAC	13	10		NA	NA	NA	No	YES	No	No	No	SPBC428.12c_intron1	UGCUAAC	11	1	YES	No
II	3387884	3388031	148	1	SPBC3B8.04c	SPBC3B8.04c.1:exon:3-SPBC3B8.04c.1:exon:4	int_3148	13	3	10	0	0	11	4	2	A;A;A;A	UUUGCUAACAU;UUUUGCUAACA;CAGCCGGAGAA;UUGCGAAAUUU	15;16;43;72	9;2;1;1	Awan_Short;Awan_Long	16	7	8.10561	8.39889	4.25	2.66667	4.98317	4.08234	GTATGTTTGAAAATTCTCGAGCTTACGACTGGCTATTATGATATATCCTATATTCCGACAAATTCATACTTGCGAAATTTGGGATAATGTCTGATTAACAGCCGGAGAATAAAATTGTACTTGAATTTTGCTAACATATATTTTTAAG	UGCUAAC	UGCUAAC	15	9	GCCGGAG	43	1	NA	No	YES	No	NA	No	NA	NA	0	0	No	No
I	704114	704204	91	1	SPAC22F3.03c	SPAC22F3.03c.1:exon:2-SPAC22F3.03c.1:exon:3	int_126	25	25	0	0	0	15	2	1	A;A	UUUAUUAAUAU;UUUUAUUAAUA	13;14	24;1	Awan_Short	0	0	2.67505	2.61894	1	0.5	0.746137	0.622914	GTATTCCTACATGTCGAACTTACTAAAAATGAAGTCGCAAACAATATAGCATCTTTTATTGAGAGATATTTTTTATTAATATATGTTAAAG	UAUUAAU	UAUUAAU	13	24		NA	NA	NA	No	YES	No	No	No	SPAC22F3.03c_intron2	UAUUAAU	11	10	YES	No
II	3549787	3549876	90	-1	SPBC887.05c	SPBC887.05c.1:exon:2-SPBC887.05c.1:exon:1	int_4159	14	14	0	0	0	13	2	1	A;A	AAAAUUAACAA;UAAAAUUAACA	10;11	13;1	Awan_Short	67	58	4.61155	4.34537	34	9.83333	6.23212	6.31583	GTAAGTTTTCTATTGAGGCTAAAATATAGCAAAAATCCGATTCATCTTTTCGCTGTTTTCGTTTTTTAATTTTAAAATTAACAAAAGTAG	AAUUAAC	AAUUAAC	10	13		NA	NA	NA	No	YES	No	NA	No	SPBC887.05c_intron1	AAUUAAC	8	2	YES	No
II	401911	402016	106	-1	SPBC106.12c	SPBC106.12c.1:exon:4-SPBC106.12c.1:exon:3	int_3429	6	6	0	0	0	5	1	1	A	UAUACUAACAC	15	6	Awan_Short	40	37	3.29142	4.06866	20.5	9.5	5.09985	5.44142	GTATGTTTTGAATTTATAAGATAAGCTGTAAACTTTTTTATTACTCTATTAGCTCTTAGTCTACATGCACTGTTATTATCATTATATACTAACACAGCAATCTTAG	UACUAAC	UACUAAC	15	6		NA	NA	NA	No	YES	No	No	No	SPBC106.12c_intron3	UACUAAC	13	1	YES	No
III	465130	465258	129	1	SPCC4G3.04c	SPCC4G3.04c.1:exon:1-SPCC4G3.04c.1:exon:2	int_4464	32	30	2	0	0	19	2	2	A;A	GAUUCUAACCU;UGAUUCUAACC	13;14	28;4	Awan_Short;Awan_Long	153	104	7.25604	7.52335	2.48387	1.69355	7.18466	7.01704	GTATGTATGGAAGAACTGGTTTGCTAGGACATGTGATTTGATTGTAAATCATAACATTTTGCATTTTGCATTTACTGAAGAAATTTGACTTCAATCTTAAATAGGTACTGATTCTAACCTTTTAATTAG	UUCUAAC	UUCUAAC	13	28		NA	NA	NA	No	YES	No	NA	No	SPCC4G3.04c_intron1	AUUCUAA;UUCUAAC	12;11	1;9	YES	No
II	1756673	1756823	151	-1	SPBC1D7.01	SPBC1D7.01.1:exon:2-SPBC1D7.01.1:exon:1	int_3717	11	7	4	0	0	11	4	2	A;A;A;A	UUUACUAACUG;AUUUACUAACU;AAACAGCACUU;AUACGGAAUUA	15;16;69;84	8;1;1;1	Awan_Short;Awan_Long	14	16	8.03493	8.21025	15	17	5.57674	5.79929	GTAAGTGTCATAAAATGAAACATGTATTTTTATTTTCTTTTCTATAAAAATAGGGAAAGAATACGGAATTAGCAAAAACAGCACTTTTGGAATGGAATTGACCGTACTGTCAATCTATATGTAAAGTCATTTACTAACTGTTTATTTACAG	UACUAAC	UACUAAC	15	8	ACGGAAU	84	1	NA	No	YES	No	NA	No	NA	NA	0	0	No	No
I	1586097	1586188	92	-1	SPAC23H4.21	SPAC23H4.21.1:exon:2-SPAC23H4.21.1:exon:1	int_1493	4	4	0	0	0	4	1	1	A	UUUACUAAAAC	17	4	Awan_Short	17	8	2.17385	1.46567	2.57143	4.5	3.46442	3.29876	GTAAGTTGAGTCGGTTATTATTTTTTTCCTTTTTTAAAATTCTATCTTTGTTTGCGTTTTTTTGCTACTTTACTAAAACTTTTTTTCACCAG	UACUAAA	UACUAAA	17	4		NA	NA	NA	No	YES	YES	NA	YES	SPAC23H4.21_intron1	UACUAAA	15	2	YES	No
I	1701143	1701213	71	-1	SPAC824.09c	SPAC824.09c.1:exon:4-SPAC824.09c.1:exon:3	int_1522	3	3	0	0	0	3	1	1	A	AAAACUAACAA	13	3	Awan_Short	30	31	3.03309	3.51755	3.44444	2.66667	4.91605	5.16206	GTAAGTTTGTCTACTTTTCAAAAAAACTTTGCGCTCACGTCCTAAAATATAAAAACTAACAACTTTAATAG	AACUAAC	AACUAAC	13	3		NA	NA	NA	No	YES	No	NA	No	NA	NA	0	0	No	No
III	541389	541568	180	1	SPCC962.01	SPCC962.01.1:exon:1-SPCC962.01.1:exon:2	int_4477	17	16	1	0	0	13	4	2	A;A;A;A	GUAAUUAACGC;UCCACUUAUUU;UGUAAUUAACG;ACAUUCUAUCU	13;43;14;59	13;2;1;1	Awan_Short;Awan_Long	4	5	8.09187	8.27084	5	6	5.74786	5.33538	GTAAGCGACTATTACTTATGTGTGTGTATGTTTGTATGAGATATGCCCGGATATTGACGTTTATTTTGATTTTCTGTTACAATTGACATCTCTATTGTTCGAGCATGGAACATCACATTCTATCTGTAACTCCACTTATTTTACGTTTAATCTGTCAATTGTAATTAACGCTAGAAATAG	AAUUAAC	AAUUAAC	13	13	CACUUAU	43	2	NA	No	YES	No	NA	No	SPCC962.01_intron1	AAUUAAC	11	4	YES	No
II	2874387	2874540	154	1	SPBP4H10.04	SPBP4H10.04.1:exon:2-SPBP4H10.04.1:exon:3	int_2973	7	6	1	0	0	7	1	2	A	CGGUCUGACAG	9	7	Awan_Short;Awan_Long	23	16	6.47502	6.41732	3.42857	4.25	5.73728	5.73536	GTATGTTGATTATCACCTTTCATATTTAGGCCCTAATTACTATAAGGTAAAATATTAGAACTTTGAAATGTAATTTATGACTATGTTTTTCCTTCATTTTAATTTGGGTCGATATTTTGTTTGTATTGCAATATTCTTCGGTCTGACAGCTTAG	GUCUGAC	GUCUGAC	9	7		NA	NA	NA	No	YES	No	NA	No	SPBP4H10.04_intron2	GUCUGAC	7	2	YES	No
III	2205485	2205548	64	1	SPCC1919.01	SPCC1919.01.1:exon:5-SPCC1919.01.1:exon:6	int_4832	12	7	5	0	0	8	1	2	A	AUUACUAAUAU	19	12	Awan_Short;Awan_Long	1	0	1.37549	1.25227	1	1	2.54864	1.90757	GTATGCAGAATGTTAAAAAAATTTCCCCGGACACGATGATTACTAATATATATAACAATTATAG	UACUAAU	UACUAAU	19	12		NA	NA	NA	No	YES	No	NA	No	NA	NA	0	0	No	No
III	495613	495672	60	-1	SPCC970.09	SPCC970.09.1:exon:2-SPCC970.09.1:exon:1	int_4957	8	7	1	0	0	6	2	2	A;A	UUUACUAACGA;AUUUACUAACG	13;14	6;2	Awan_Short;Awan_Long	15	9	3.27595	3.56776	16	10	4.82752	4.79283	GTATGTTGCGTGAATAAGTGAAGATTGGAGGATGTTTGAATTTACTAACGAATGGTTAAG	UACUAAC	UACUAAC	13	6		NA	NA	NA	No	YES	No	No	No	NA	NA	0	0	No	No
I	1054255	1054345	91	1	SPAC23C4.14	SPAC23C4.14.1:exon:3-SPAC23C4.14.1:exon:4	int_246	29	29	0	0	0	21	2	1	A;A	AUAACUAACUG;GAUAACUAACU	10;11	22;7	Awan_Short	24	19	2.56813	3.0664	12.5	20	4.9268	4.71243	GTATGAAAAAAGATTTTTTTACAAAAAAAACCTTGAATAGCGATTCCTACATAATTTATTGGCTTTTTCGTACGATAACTAACTGTTTTAG	AACUAAC	AACUAAC	10	22		NA	NA	NA	No	YES	No	NA	No	SPAC23C4.14_intron3	AACUAAC	8	3	YES	No
I	818319	818428	110	1	SPAC2G11.06	SPAC2G11.06.1:exon:2-SPAC2G11.06.1:exon:3	int_173	10	10	0	0	0	7	2	1	A;A	UUUGCUAAUAU;GUUUGCUAAUA	9;10	9;1	Awan_Short	5	2	4.52486	4.99446	3	1.5	1.89006	2.02987	GTAAGTTACTCAATAGTTTGAATTAGGGTGAGGATATATTGTCGCAATGATTCATAAGGAAATTTATATTTGGATCTACATTTTCAAGTTATTGTTTGCTAATATTTCAG	UGCUAAU	UGCUAAU	9	9		NA	NA	NA	No	YES	No	No	No	SPAC2G11.06_intron2	UUGCUAA;UGCUAAU	8;7	1;5	YES	No
I	520695	520799	105	1	SPAC227.14	SPAC227.14.1:five_prime_UTR:1-SPAC227.14.1:exon:1	int_84	11	11	0	0	0	9	2	1	A;A	GAUGCUAAUCG;UGAUGCUAAUC	15;16	8;3	Awan_Short	4	1	2.4686	3.76041	5	2	0.350356	0.642168	GTAAGTGAGTGTTTACCTTTACAACGTACTGGTAAACAGAAGATCAATTATAATAAACATCTAGTTTGGTATGAGAGATATTTGATGCTAATCGTGTTATCATAG	UGCUAAU	UGCUAAU	15	8		NA	NA	NA	No	YES	No	NA	No	SPAC227.14_intron1	AUGCUAA;UGCUAAU	14;13	1;1	YES	No
II	3998020	3998115	96	1	SPBC3B9.05	SPBC3B9.05.1:exon:2-SPBC3B9.05.1:exon:3	int_3281	4	4	0	0	0	3	1	1	A	UAUACUAACUU	11	4	Awan_Short	20	16	3.11245	3.08234	3.5	4.25	6.62831	6.868	GTATGTTTGCATTATACAGATTCAAGTGTTTGAATCAAACTGAATGCTGTCATTTTTACCAAAAGTTTTTATAGCGTATATACTAACTTGACAAAG	UACUAAC	UACUAAC	11	4		NA	NA	NA	No	YES	No	NA	No	NA	NA	0	0	No	No
I	52241	52317	77	1	SPAC977.10	SPAC977.10.1:exon:1-SPAC977.10.1:exon:2	int_5	63	63	0	0	0	39	2	1	A;A	AAGACUAAUAC;UAAGACUAAUA	14;15	47;16	Awan_Short	16	10	1.69367	1.98548	17	11	2.01403	1.88315	GTACGTTGAAGATATTGTATAGGGTGGTTTTTGAAAATTAGCAATTGATATAAAATAAGACTAATACTAGTGTGTAG	GACUAAU	GACUAAU	14	47		NA	NA	NA	No	YES	No	NA	No	SPAC977.10_intron1	GACUAAU	12	14	YES	No
III	1427710	1427787	78	1	SPCC622.14	SPCC622.14.1:exon:2-SPCC622.14.1:exon:3	int_4662	5	5	0	0	0	5	2	1	A;A	UUGACUAACAC;AUUGACUAACA	12;13	3;2	Awan_Short	36	23	5.09008	5.16326	1.7619	3	5.27991	5.13678	GTATGATCTTTGAACCTTCTATATTTTTTCCAGTTTACCTTATTTTGATTTTATTCACATTGACTAACACATTTTAAG	GACUAAC	GACUAAC	12	3		NA	NA	NA	No	YES	No	NA	No	SPCC622.14_intron2	GACUAAC	10	3	YES	No
III	296267	296356	90	-1	SPCC553.06	SPCC553.06.1:exon:2-SPCC553.06.1:exon:1	int_4905	6	6	0	0	0	6	2	1	A;A	GAUUCUAACUC;AGAUUCUAACU	18;19	5;1	Awan_Short	21	28	5.43822	5.17545	1.46667	1.70588	8.03807	8.08596	GTAGGTATATTGTTAGCGAAATACCGTTTTCGAAAACTAGTTCCAATCTATTCTATAAAACTGAAGATTCTAACTCTCTTATCTCTTTAG	UUCUAAC	UUCUAAC	18	5		NA	NA	NA	No	YES	No	NA	No	SPCC553.06_intron1	UUCUAAC	16	2	YES	No
II	1869442	1869601	160	1	SPBC3H7.08c	SPBC3H7.08c.1:exon:2-SPBC3H7.08c.1:exon:3	int_2758	7	4	3	0	0	7	2	2	A;A	GUAGCUAACAG;UGUAGCUAACA	12;13	5;2	Awan_Short;Awan_Long	0	3	0.860919	-1.65458	1	4	-0.324937	1.55183	GTATGTTAAAAATTAGTAGAAAATTAGAAATCAGCGCAGTTAATGAAACATTATACTCAATTTTAATATTCTGTTAAAATTTTCCTACAGAATATTTATTTTACAAGCGCATTTACATATGATTGTTTAAATTAAATGATTGTAGCTAACAGTTTTTTAG	AGCUAAC	AGCUAAC	12	5		NA	NA	NA	No	YES	No	No	No	SPBC3H7.08c_intron2	AGCUAAC	10	2	YES	No
I	2348882	2349007	126	-1	SPAC17G8.04c	SPAC17G8.04c.1:exon:3-SPAC17G8.04c.1:exon:2	int_1669	56	47	9	0	0	28	3	2	A;A;A	AAUUUUAACUU;GAAUUUUAACU;ACUGUACAAAC	10;11;109	50;3;3	Awan_Short;Awan_Long	120	84	5.32894	5.41794	30.25	21.25	6.54321	6.21894	GTATGTGCAAACTGTACAAACTGCTTAAAGACGGTTTATATCAATTACGTTTTTATTTATTGATTAAATTTACAATTCTTCTTGATTTCATTTTATTATGGTGTAAATGAATTTTAACTTTTTTAG	UUUUAAC	UUUUAAC	10	50	UGUACAA	109	3	NA	No	YES	No	NA	No	SPAC17G8.04c_intron2	UUUUAAC	8	2	YES	No
I	4996764	4996903	140	-1	SPAC1952.15c	SPAC1952.15c.1:exon:2-SPAC1952.15c.1:exon:1	int_2276	4	4	0	0	0	3	1	1	A	UUCGUUAACAA	14	4	Awan_Short	2	2	0.246214	0.122991	1.5	3	2.05808	1.59782	GTAAGTACTTGCACGATGCTTATTAAATCCATCAATACTAGGCCGGTATATCTTCTTATATCTAAAGCATTAGTTATATTAAAGAAAGCCTTTTTGATCTAAAATAGTATGAATTTTCTTTCGTTAACAATCCAATCTAG	CGUUAAC	CGUUAAC	14	4		NA	NA	NA	No	YES	No	NA	No	NA	NA	0	0	No	No
II	639429	639511	83	1	SPBC115.01c	SPBC115.01c.1:exon:1-SPBC115.01c.1:exon:2	int_2457	6	6	0	0	0	3	1	1	A	UAUGCUAACAU	12	6	Awan_Short	17	5	3.52401	2.46219	9	0.857143	4.9849	4.80816	GTAATGCTATTATCCACGGTATATTAGCCAAGCAAATGCCAATTAAAAAAAAATGAATTTTCTTTATGCTAACATCATTGTAG	UGCUAAC	UGCUAAC	12	6		NA	NA	NA	No	YES	No	NA	No	NA	NA	0	0	No	No
I	2028574	2028697	124	-1	SPAC17H9.13c	SPAC17H9.13c.1:exon:2-SPAC17H9.13c.1:exon:1	int_1596	61	54	7	0	0	23	2	2	A;A	UUUGCUAACAU;CUUUGCUAACA	12;13	49;12	Awan_Short;Awan_Long	67	53	5.6012	5.77919	34	54	5.68286	6.02826	GTAAGCACGGAATAGTAAGCTATACAAAAGCATATGTATGAATTTTATATCTCACTTTTTCAAATATGTATTTCTTTGTTTGCTCGTTGTTGGCATCACAAACGCTTTGCTAACATTATTTTAG	UGCUAAC	UGCUAAC	12	49		NA	NA	NA	No	YES	No	NA	No	SPAC17H9.13c_intron1	UGCUAAC;UUGCUAA	10;11	3;1	YES	No
I	1632088	1632166	79	1	SPAP27G11.12	SPAP27G11.12.1:exon:1-SPAP27G11.12.1:exon:2	int_352	2	2	0	0	0	2	1	1	A	AUUAUUAACCA	12	2	Awan_Short	36	37	4.97859	4.45098	7.4	9.5	6.22348	6.55482	GTATGTTTATTTTTTTGTCCAATTTCTCAACCTGCCGTAGGTTTGGGGAAGAACCAATACATTATTAACCAAATTACAG	UAUUAAC	UAUUAAC	12	2		NA	NA	NA	No	YES	No	NA	No	NA	NA	0	0	No	No
I	4423405	4423516	112	1	SPAC16.01	SPAC16.01.1:exon:4-SPAC16.01.1:exon:5	int_889	8	8	0	0	0	7	3	1	A;A;A	GAUACUAACUA;UGAUACUAACU;AUUUGAUACUA	10;11;14	6;1;1	Awan_Short	16	11	4.02756	3.61483	1.13333	1.5	4.09008	3.84133	GTATGTGTGATTAACAAGTTATTGAGCTTTTTCAGTTGGTTACAGAAAGTTACTTTCCCACTGGTCCCTTTTCTTTGGGTTTTGCTAATACATTTGATACTAACTAAAATAG	UACUAAC	UACUAAC	10	6	UUGAUAC	14	1	NA	No	YES	No	YES	No	SPAC16.01_intron4	UACUAAC	8	4	YES	No
II	1776550	1776713	164	-1	SPBC18H10.04c	SPBC18H10.04c.1:exon:4-SPBC18H10.04c.1:exon:3	int_3724	105	42	63	0	0	42	2	2	A;A	UUAGCUAACUC;CUUAGCUAACU	18;19	84;21	Awan_Short;Awan_Long	27	15	9.34492	9.21889	4	8	6.20556	5.86302	GTAAGTATTTTGTTTTTTATAATGGAAAATTTTGGATTGAATTGGAGTGGGGTGTTTTTTAGGAATCCGAAAATTTCTATTAATTTTCGGCTCTCATTTTTGGGCTCCATCATTTTTCTATTTAATCTTTTGAAATTGCTTAGCTAACTCAATTTATCTATTAG	AGCUAAC	AGCUAAC	18	84		NA	NA	NA	No	YES	No	NA	No	SPBC18H10.04c_intron3	AGCUAAC	16	6	YES	No
I	3258749	3258929	181	-1	SPAC6G9.07c	SPAC6G9.07c.1:exon:4-SPAC6G9.07c.1:exon:3	int_1875	34	34	0	0	0	24	3	1	A;A;A	CAAACUAACCU;UCAAACUAACC;UCAUCAAACUA	17;18;21	32;1;1	Awan_Short	130	125	7.83709	7.7411	65.5	31.5	6.05774	6.25226	GTACGTTATTACAAATTGTAATTGGCAAAAAAGTGTTCAAGGGAAGAATTTCTAGAGATTTTGCGTTAGTTTAAGTGTTCACTGTTCTGCCTCAGCCATTGTATAGTTCTTCTTTTTTTTCTTTTTCGAAGTTGCCATTGCTATTTGTAAATATCATCAAACTAACCTTTCTTTGTTATAG	AACUAAC	AACUAAC	17	32	AUCAAAC	21	1	NA	No	YES	No	NA	No	SPAC6G9.07c_intron3	AACUAAC	15	4	YES	No
II	2030796	2030870	75	-1	SPBP23A10.14c	SPBP23A10.14c.1:exon:2-SPBP23A10.14c.1:exon:1	int_3775	11	11	0	0	0	9	2	1	A;A	GUUGCUAACCA;UGUUGCUAACC	19;20	9;2	Awan_Short	7	5	3.39459	4.34537	2.66667	2	4.76616	4.45179	GTATGTGTGGGCATTTGTGAAGAGCGATAAAGAAGAATGAATTTTGAATGTTGCTAACCAATATACTTTTTTTAG	UGCUAAC	UGCUAAC	19	9		NA	NA	NA	No	YES	No	NA	No	SPBP23A10.14c_intron1	UGCUAAC	17	1	YES	No
I	4843232	4843309	78	-1	SPAC4F10.07c	SPAC4F10.07c.1:exon:2-SPAC4F10.07c.1:exon:1	int_2238	44	44	0	0	0	33	4	1	A;A;A;A	AGUAUUAACAU;AACAUUUACAA;AAGUAUUAACA;CAUUUACAAAU	14;8;15;6	29;8;6;1	Awan_Short	4	2	1.89744	2.18925	5	1.5	3.59788	2.6673	GTAAGTTAAAGTGTGTATCATAAGCTTGCTTGAGGTCCACCCATCCTTTACTTGAAAAGTATTAACATTTACAAATAG	UAUUAAC	UAUUAAC	14	29	CAUUUAC	8	8	NA	YES	YES	No	NA	No	SPAC4F10.07c_intron1	UAUUAAC	12	10	YES	No
II	3327477	3327596	120	1	SPBC17D1.01	SPBC17D1.01.1:exon:2-SPBC17D1.01.1:exon:3	int_3127	6	6	0	0	0	6	1	1	A	UUUUCUGACUA	14	6	Awan_Short	62	69	7.41988	7.40787	3.5	5.38462	7.37171	7.23457	GTATGATACTATCTTAACCAAGTTGGTAGAACTAGTAAATGATCCGTTTGATGTATAGTTATAATAAATTTATTTTTATTTTTATTTATTTAATGAAACTTTTCTGACTATTATATGAAG	UUCUGAC	UUCUGAC	14	6		NA	NA	NA	No	YES	No	No	No	SPBC17D1.01_intron2	UUCUGAC	12	1	YES	No
II	3153724	3153798	75	1	SPBC405.07	SPBC405.07.1:exon:1-SPBC405.07.1:exon:2	int_3048	21	21	0	0	0	16	2	1	A;A	AAUACUAACAG;GAAUACUAACA	11;12	19;2	Awan_Short	1033	855	5.0774	4.8308	1034	428	10.1298	10.064	GTAAGTAACCTTTTGAGTGCATTTAATTTAATTTTTTTTTTTTTAATTTTGTGAATGAATACTAACAGGTTTTAG	UACUAAC	UACUAAC	11	19		NA	NA	NA	No	YES	No	NA	No	SPBC405.07_intron1	UACUAAC	9	22	YES	No
I	3114000	3114128	129	-1	SPAC688.02c	SPAC688.02c.1:exon:3-SPAC688.02c.1:exon:2	int_1850	4	4	0	0	0	4	2	1	A;A	AUUACUAAUGC;AAUUACUAAUG	15;16	3;1	Awan_Short	0	1	0.364269	1.24104	1	2	0.9695	0.261318	GTGAGTATACAGTACACGCTTCTAATCAGCCATAAAGTCGAAATTCCATAGCAGCTTCGATTAAAAAAAATATATATATATATAAAGTAAAATGAGAGACCTCTTCAATTACTAATGCTTAACATATAG	UACUAAU	UACUAAU	15	3		NA	NA	NA	No	YES	No	NA	No	SPAC688.02c_intron2	UACUAAU	13	1	YES	No
III	596762	596841	80	-1	SPCC1183.03c	SPCC1183.03c.1:exon:2-SPCC1183.03c.1:exon:1	int_4988	5	5	0	0	0	5	2	1	A;A	GAUUCUAACAC;CGAUUCUAACA	15;16	4;1	Awan_Short	3	4	1.37549	2.6673	4	2.5	2.12756	1.41938	GTATGTCAACAGAGTTGCCCAAACATTACAATTAGTCTAGCTGAGTTTGTGTTGAAACGATTCTAACACTAGATTTGCAG	UUCUAAC	UUCUAAC	15	4		NA	NA	NA	No	YES	No	NA	No	SPCC1183.03c_intron1	UUCUAAC	13	4	YES	No
III	339355	339482	128	-1	SPCC736.12c	SPCC736.12c.1:exon:2-SPCC736.12c.1:exon:1	int_4921	45	37	8	0	0	21	2	2	A;A	UUUACUAACCA;UUUUACUAACC	14;15	38;7	Awan_Short;Awan_Long	68	40	8.30178	8.32193	17.25	6.83333	5.39472	5.22949	GTAAGTAGATTATTGTTTAAAATATCAGAGAGGAATGTAAAATAGTGTCATTGAAAATTGACTGACTTTTCGCCTAAAACCTCCTACTGTTTAATTTTGTCGAGAATTTTACTAACCACCTTATATAG	UACUAAC	UACUAAC	14	38		NA	NA	NA	No	YES	No	NA	No	SPCC736.12c_intron1	UACUAAC	12	10	YES	No
I	3547153	3547266	114	-1	SPAC1B1.04c	SPAC1B1.04c.1:exon:2-SPAC1B1.04c.1:exon:1	int_1956	17	17	0	0	0	12	1	1	A	UAAGCUUACAU	14	17	Awan_Short	13	4	4.37549	4.71705	7	2.5	4.82027	3.95681	GTAAGTGATTATTTTTTAATAAAAGAAATTTCCAAAGAGAAACGTTTAGTATAATTAATTTTATTGGCGAGTTTTTTGCTCTTATTTCAAACATAAGCTTACATGTTCAATCAG	AAUUAAU	AGCUUAC	14	17		NA	NA	NA	No	No	No	NA	No	SPAC1B1.04c_intron1	AGCUUAC	12	5	YES	No
II	2347292	2347385	94	-1	SPBC19G7.01c	SPBC19G7.01c.1:exon:3-SPBC19G7.01c.1:exon:2	int_3845	1	1	0	0	0	1	1	1	A	CAAUCUAACAC	14	1	Awan_Short	3	4	-1.17907	2.28264	4	1.66667	3.26636	3.18378	GTAAGTATTGATGAATAGAAAAATTTACTTAAACTTCGTAAAAAATAACTTGAAATATTATTATTTTTTAATCCAATCTAACACTGTTTTCTAG	AUCUAAC	AUCUAAC	14	1		NA	NA	NA	No	YES	No	No	No	NA	NA	0	0	No	No
II	4180083	4180200	118	-1	SPBC14F5.11c	SPBC14F5.11c.1:exon:2-SPBC14F5.11c.1:exon:1	int_4296	5	5	0	0	0	4	1	1	A	AUUACUAACGG	11	5	Awan_Short	60	42	8.00459	8.28649	12.2	14.3333	5.76015	5.51974	GTAAGTTAAGGAAATTGGTTGATAATGTATTAAGTCGAACTATTCATTGTAGAATCCTTGCTTCATTCTTCTCTTTTGTTTGGAAGTATTGAAATGTTTGATTACTAACGGTTTTTAG	UACUAAC	UACUAAC	11	5		NA	NA	NA	No	YES	No	NA	No	SPBC14F5.11c_intron1	UACUAAC	9	3	YES	No
II	4005640	4005803	164	1	SPBC3B9.10	SPBC3B9.10.1:exon:4-SPBC3B9.10.1:exon:5	int_3285	3	2	1	0	0	3	2	2	A;A	UUUGUUAACCA;AUUUGUUAACC	10;11	2;1	Awan_Short;Awan_Long	125	128	4.39297	4.30975	63	129	6.2839	6.46481	GTAAGTAATTATTGCAAAATAGATAAATGAATCACTATGATTGATAAGATAAAATGCGCGATTTATACGCATATCTTAGCCAAGCTTATTAGCTCCATGGTTTAAAAATATAGTTTTCTTTTATGCTATGTATAAATTTCTTTGAGATTTGTTAACCAAATTAG	UGUUAAC	UGUUAAC	10	2		NA	NA	NA	No	YES	No	NA	No	SPBC3B9.10_intron4	UGUUAAC	8	1	YES	No
I	3729898	3729983	86	1	SPAC15E1.08	SPAC15E1.08.1:exon:1-SPAC15E1.08.1:exon:2	int_780	28	28	0	0	0	18	3	1	A;A;A	UUUUCUAAUUU;AUUUUCUAAUU;GAUUCUUAUUU	11;12;19	24;2;2	Awan_Short	19	14	5.17804	5.54481	5	15	6.16589	6.10261	GTAAGTTCAATTCATTGTAATTCTTGCTGCACGGCAATGAACTTCCAGTATTAAAACAATGATTCTTATTTTCTAATTTAATGTAG	UUCUAAU	UUCUAAU	11	24	UUCUUAU	19	2	NA	No	YES	No	NA	No	SPAC15E1.08_intron1	UUCUUAU;UUCUAAU	17;9	1;5	YES	No
I	2721644	2721747	104	1	SPAPB2B4.05	SPAPB2B4.05.1:exon:4-SPAPB2B4.05.1:exon:5	int_580	28	28	0	0	0	15	1	1	A	AGAUCUAACAU	15	28	Awan_Short	21	25	5.86487	5.39312	7.33333	26	4.93939	4.84418	GTATGTCTTTCCTGTTATCATCACTTGATTATCTAATGGATCTATCGGTTTCCGTGTGACACCTTTTTTTATGAGTTTGTTAAGATCTAACATTTTCTTTTTAG	AUCUAAC	AUCUAAC	15	28		NA	NA	NA	No	YES	No	NA	No	SPAPB2B4.05_intron4	AUCUAAC	13	13	YES	No
II	265469	265604	136	1	SPBC800.08	SPBC800.08.1:exon:1-SPBC800.08.1:exon:2	int_2396	4	3	1	0	0	4	2	2	A;A	UGAUCUUACUG;CUUACUGACUU	20;16	3;1	Awan_Short;Awan_Long	14	9	4.57342	4.64593	7.5	10	2.71837	2.76918	GTAAGTATGAGGATCTTAATTTACAATTTAAAGTACATTTTCAATGATAGCAATTGAAATTGTTTTTTGCATAAGGAGATAGAGGTGATCTAGTTTATCTCGTTCATATTGATCTTACTGACTTTATATTAAATAG	UACUGAC	AUCUUAC	20	3	UACUGAC	16	1	NA	YES	No	No	NA	No	SPBC800.08_intron1	AUCUUAC	18	1	YES	No
I	648502	648613	112	-1	SPAC1D4.06c	SPAC1D4.06c.1:exon:3-SPAC1D4.06c.1:exon:2	int_1253	13	13	0	0	0	8	2	1	A;A	UUUGCUAACUG;UUUUGCUAACU	12;13	9;4	Awan_Short	39	30	5.84425	5.79068	10	15.5	5.1193	4.87489	GTAAGTTTCAAATCTTTAACATTATATCTGAGCCTTTGAACAAAAACAAAACATTTTAGACTTTTTTTTTAAATAATAGGGTTTCATGCAGATTTTGCTAACTGTTTTTAAG	UGCUAAC	UGCUAAC	12	9		NA	NA	NA	No	YES	No	NA	No	NA	NA	0	0	No	No
II	852848	852915	68	-1	SPBC36.06c	SPBC36.06c.1:exon:3-SPBC36.06c.1:exon:2	int_3542	1	1	0	0	0	1	1	1	A	GGUACUGACGG	12	1	Awan_Short	2	3	1.87299	1.90177	3	2	4.1496	4.05063	GTAAGTAAACTGGTTTTTTAATTCAGATTTGTTTACGTAAAATCACTGGGGTACTGACGGATGTTCAG	UACUGAC	UACUGAC	12	1		NA	NA	NA	No	YES	No	No	No	SPBC36.06c_intron2	UACUGAC	10	1	YES	No
I	2152541	2152698	158	1	SPAC23C11.11	SPAC23C11.11.1:exon:2-SPAC23C11.11.1:exon:3	int_465	19	9	10	0	0	8	2	2	A;A	GAUACUAAUAU;CGAUACUAAUA	11;12	18;1	Awan_Short;Awan_Long	90	78	8.75382	8.64776	91	26.3333	7.45538	7.5868	GTAAGAATAAAAAAAAAAAGCTTTTTGTATTGAATCGTCTTGAAACTTGAAGGAGAAGAAATTTTGTGCTTTTCCGTCTATTGAGTTTATACGACTCTGGCTTTTGAACGTTTGATATCCATCAAACTATTGTATTTGTCGATACTAATATTTTATAG	UACUAAU	UACUAAU	11	18		NA	NA	NA	No	YES	No	NA	No	NA	NA	0	0	No	No
III	2162501	2162583	83	-1	SPCC1620.09c	SPCC1620.09c.1:exon:2-SPCC1620.09c.1:exon:1	int_5305	2	2	0	0	0	2	1	1	A	UAUGCUUACUC	9	2	Awan_Short	22	21	1.8078	1.29226	23	22	6.58908	6.74805	GTAAGTTTTTATCCCATTTGAAGATGTTGGATGTTTATCATTCATCTTTTGATCATTTAAGATTTTTTATGCTTACTCTATAG	UUUUGAU	UGCUUAC	9	2		NA	NA	NA	No	No	No	No	No	NA	NA	0	0	No	No
I	5189769	5189968	200	1	SPAPJ691.03	SPAPJ691.03.1:exon:1-SPAPJ691.03.1:exon:2	int_1076	16	11	5	0	0	12	2	2	A;A	UUUUCUAACAA;UUUUUCUAACA	18;19	15;1	Awan_Short;Awan_Long	71	67	7.46295	7.52925	72	17	4.93536	5.02849	GTATGTTATGCGTATAATAATGAAACAAAATAAAAAAAGGAATTACTGTTAAACATGGATATACATTTTTTAAGGACACCTGAAGAAGCCAGTTCTGAAGGTGATGCGGTAATACATATCTGTTGAAAGATACATATGATTGCTTCAAGTCGATTGTTTCATGTTACTTTTTACTTTTTCTAACAACATTGCTGTTTTAG	UUCUAAC	UUCUAAC	18	15		NA	NA	NA	No	YES	No	NA	No	SPAPJ691.03_intron1	UUCUAAC	16	2	YES	No
I	3833137	3833201	65	1	SPAC4H3.05	SPAC4H3.05.1:exon:1-SPAC4H3.05.1:exon:2	int_802	1	1	0	0	0	1	1	1	A	AUUGCUGAUCU	10	1	Awan_Short	5	4	2.16047	3.10436	1.5	1	2.75606	2.31824	GTATGTCTTGTTTACACTTTTCTAACTTTTACTTCTCCACTTTCAACCATTGCTGATCTATTTAG	UGCUGAU	UGCUGAU	10	1		NA	NA	NA	No	YES	No	NA	No	SPAC4H3.05_intron1	UGCUGAU	8	1	YES	No
I	5287699	5287850	152	-1	SPAC11E3.04c	SPAC11E3.04c.1:exon:3-SPAC11E3.04c.1:exon:2	int_2328	18	12	6	0	0	14	2	2	A;A	AGUUUUAACAA;GAGUUUUAACA	11;12	17;1	Awan_Short;Awan_Long	211	202	4.17195	4.6092	14.1333	14.5	7.00142	7.24333	GTAGGTTTTTTTTGAAAACACAGTATTGAGCCTACCATGGTCCTTTTGCTAGCCCTGCTAGTTCAACAAAAATTTGAAGAATGGCATTGTCAGTTTCAAACTGTCTTCAAAAAATTGTATAATTGTGTAATTTGAGTTTTAACAACTATTAG	UUUUAAC	UUUUAAC	11	17		NA	NA	NA	No	YES	No	NA	No	SPAC11E3.04c_intron2	UUUUAAC	9	2	YES	No
II	2756042	2756171	130	1	SPBC336.08	SPBC336.08.1:exon:2-SPBC336.08.1:exon:3	int_2946	3	2	1	0	0	3	1	2	A	UCUACUCACAC	12	3	Awan_Short;Awan_Long	8	7	4.37549	4.28879	0.346154	0.307692	5.08646	5.02987	GTATGTCATTTGCTCATAATTTGAATTTACCTTTCAATTTTTTATCTTTAAAAAGCTTGATGATATGAAAAATTCAAGCTTTAAAATTGAACTTTAAAACTGTTTTTCGAATCTACTCACACTTTCCTAG	GCUUGAU	UACUCAC	12	3		NA	NA	NA	No	No	No	No	No	NA	NA	0	0	No	No
II	1233561	1233687	127	1	SPBC725.16	SPBC725.16.1:exon:1-SPBC725.16.1:exon:2	int_2590	6	4	2	0	0	5	3	2	A;A;A	GUUACUAACUA;UUUUUGGAUGC;UGUUACUAACU	13;26;14	3;2;1	Awan_Short;Awan_Long	49	37	6.40917	6.18641	7.14286	2.71429	4.76434	4.43449	GTTTGTGTTAACTTCTTACTATATCAATAGGTTTAAAACTACTTAAATAACATAAAATTTTTGTCTCTGTTGTTTTTATTTATCAATTTATACTTTTTTGGATGCCTGTTACTAACTATTCATTCAG	UACUAAC	UACUAAC	13	3	UUUGGAU	26	2	NA	No	YES	No	NA	No	SPBC725.16_intron1	UACUAAC	11	3	YES	No
I	980533	980627	95	-1	SPAC222.16c	SPAC222.16c.1:exon:4-SPAC222.16c.1:exon:3	int_1346	1	1	0	0	0	1	1	1	A	GACGCUAACCA	10	1	Awan_Short	13	18	1.80563	2.68241	14	19	3.60411	3.62291	GTAAGTGTACTATTACCTTTAATACTCGAAATTTCAAGTATATCAGAATATTTTCTCTTATAACTTCAAAGTGGAGGTGACGCTAACCAATTCAG	CGCUAAC	CGCUAAC	10	1		NA	NA	NA	No	YES	No	No	No	NA	NA	0	0	No	No
I	4043658	4043748	91	-1	SPAC19G12.01c	SPAC19G12.01c.1:exon:4-SPAC19G12.01c.1:exon:3	int_2072	59	59	0	0	0	28	2	1	A;A	AGUACUAACUA;AAGUACUAACU	11;12	55;4	Awan_Short	5	5	4.54012	4.61894	3	6	1.84206	2.4095	GTGCGTATCAAAAACCCCTTATTTATTAGCATCTTTCTAAAAGAAGTTTTTTTATCGATCGATACAAATTAGAAGTACTAACTATTCATAG	UACUAAC	UACUAAC	11	55		NA	NA	NA	No	YES	No	NA	No	SPAC19G12.01c_intron3	UACUAAC	9	43	YES	No
I	5300844	5300924	81	1	SPAC11E3.10	SPAC11E3.10.1:exon:1-SPAC11E3.10.1:exon:2	int_1094	8	8	0	0	0	6	1	1	A	CUCUCUAACCA	17	8	Awan_Short	3	1	2.03564	2.32745	2	1	2.25447	1.9248	GTAAGTAAATCAGGAAGTGCAGCTTGCAAGATTAAAATCATTCTTTACGATTCACATCTCTCTAACCAATTTTCACTTTAG	CUCUAAC	CUCUAAC	17	8		NA	NA	NA	No	YES	No	NA	No	NA	NA	0	0	No	No
III	849232	849327	96	1	SPCC63.07	SPCC63.07.1:exon:2-SPCC63.07.1:exon:3	int_4560	5	5	0	0	0	5	1	1	A	AAAACUAACCA	34	5	Awan_Short	16	10	2.59788	1.6673	8.5	11	3.97476	3.64313	GTAAGTAGCTCATTTTTTTTTATGTAAACCCTAGCGATTTATCTTCCTTTCAATAAAAACTAACCACTTTCACCTTTTGGGTGAATTACTTTACAG	AACUAAC	AACUAAC	34	5		NA	NA	NA	No	YES	No	NA	No	SPCC63.07_intron2	AACUAAC	32	2	YES	No
I	942297	942450	154	1	SPAC1687.21	SPAC1687.21.1:exon:1-SPAC1687.21.1:exon:2	int_203	4	4	0	0	0	4	1	1	A	UUUACUUACCA	16	4	Awan_Short	250	177	7.02458	6.94741	41.8333	35.6	7.92783	7.71063	GTAAGTTTTAATACCTATAAGTGATTGTTTTTCTGAGCATATGTTTAAAGCTTGTCACATCATACAGAGAGTGTTTGTTTAGCATACTCAATTTTCATTTCTAGACGGATGATCAACTATGATGATATCAATTTACTTACCATCTTAATTGCAG	UCUUAAU	UACUUAC	16	4		NA	NA	NA	No	No	No	NA	No	SPAC1687.21_intron2	UACUUAC	14	1	YES	No
I	1276847	1276936	90	1	SPAPB17E12.06	SPAPB17E12.06.1:exon:1-SPAPB17E12.06.1:exon:2	int_285	9	9	0	0	0	8	1	1	A	UGUACUAAUUA	13	9	Awan_Short	5	4	1.69099	2.34537	6	5	2.93914	2.53908	GTTCGTGAATTTCTAAAAAAGCATGAGTTTATATTTTATAATTTTTTAAAGATGTCCGTGAAAAAGAAATTGTACTAATTACTCGATTAG	UACUAAU	UACUAAU	13	9		NA	NA	NA	No	YES	No	NA	No	SPAPB17E12.06_intron1	UACUAAU	11	4	YES	No
I	3144047	3144124	78	1	SPAC688.16	SPAC688.16.1:exon:1-SPAC688.16.1:exon:2	int_656	3	3	0	0	0	3	2	1	A;A	AAAGCUAACAU;GAAAGCUAACA	13;14	2;1	Awan_Short	174	101	1.09009	2.96686	175	102	7.50544	7.33151	GTAAGTGAATATGAAATTCTGCAAAGAAATATAAAGAATAATAATGTAAATAAACAAGAAAGCTAACATGAAAACAAG	AGCUAAC	AGCUAAC	13	2		NA	NA	NA	No	YES	No	No	No	NA	NA	0	0	No	No
III	200460	200642	183	1	SPCC1235.11	SPCC1235.11.1:exon:3-SPCC1235.11.1:exon:4	int_4406	30	6	24	0	0	16	3	2	A;A;A	UUUGUUAAUCU;UCAAUGCAGUU;UUUUGUUAAUC	10;58;11	18;11;1	Awan_Short;Awan_Long	30	25	9.80193	9.74686	2.38462	1.85714	6.78291	6.54039	GTATGTGTTAAAAAATAGTCATATCAATAACTTGGCCATGACAATGCGGTTTTGGGGAAGCTCTTTTAGAGATTGGAGTTAGTTTCCTTTTTTCCGCTGATCGTGGTTATCTCTGTTGTCAATGCAGTTATCGAGATGACTTTCTGTATCGTTTAAAAGTTGCTTTTTTGTTAATCTCCTTAG	CGCUGAU	UGUUAAU	10	18	AAUGCAG	58	11	NA	No	No	No	NA	No	SPCC1235.11_intron3	UGUUAAU	8	3	YES	No
III	1923581	1923681	101	1	SPCC74.01	SPCC74.01.1:exon:2-SPCC74.01.1:exon:3	int_4745	18	18	0	0	0	13	2	1	A;A	CAAGCUAACAU;GCAAGCUAACA	13;14	16;2	Awan_Short	12	7	5.69455	6.23791	13	4	5.70063	5.6673	GTATGGATTTCTCAGTATCATAATTTTCAATCAATTAATCTTATTGTCGGATACCAAATACTTTTTTGTATTACAGTTCAGCAAGCTAACATATTTTAAAG	AGCUAAC	AGCUAAC	13	16		NA	NA	NA	No	YES	No	No	No	NA	NA	0	0	No	No
III	560099	560214	116	1	SPCC1672.01	SPCC1672.01.1:exon:1-SPCC1672.01.1:exon:2	int_4481	6	6	0	0	0	6	2	1	A;A	ACCACUAACUU;AACCACUAACU	13;14	5;1	Awan_Short	17	19	2.90982	2.80932	18	20	5.59941	5.04415	GTATGTTTGCTTTTAATTTGTAAACAAGCGATACATGTTGATGTGTTTGCCTGAGATTTTACAGATGAATTTTTTTTTTCTTTTATTCAGTGACAAACCACTAACTTTTATTGAAG	CACUAAC	CACUAAC	13	5		NA	NA	NA	No	YES	No	NA	No	SPCC1672.01_intron2	CACUAAC	11	3	YES	No
II	4375963	4376061	99	1	SPBC1539.08	SPBC1539.08.1:exon:1-SPBC1539.08.1:exon:2	int_3357	5	5	0	0	0	4	1	1	A	UUUAUUAACAU	9	5	Awan_Short	9	8	5.26969	6.00373	1.25	1.5	4.09538	4.0305	GTATGTTTTTTATTCGGATGGATTTTTACAGTCTTCATTCCGTATAATCGTGCTTAACTTGGTGTTTTAATAATGGTAACTCTTTTATTAACATTTTAG	UAUUAAC	UAUUAAC	9	5		NA	NA	NA	No	YES	No	No	No	SPBC1539.08_intron1	UAUUAAC	7	1	YES	No
I	4426269	4426458	190	-1	SPAC16.02c	SPAC16.02c.1:exon:7-SPAC16.02c.1:exon:6	int_2149	4	2	2	0	0	4	1	2	A	UAUACUAACGU	9	4	Awan_Short;Awan_Long	0	0	9.04999	9.26987	1	1	2.79052	-16.6096	GTACGTTGTTACGTTTCCATTAATATGTGATTAGTGGGCGATTTGGCATTGCACGCGATTGCTGGTTCTAACGATTTTGTTCACTTCACATGTGAATCAGCTCTGAGTAGTGACTATATACGGTGTTATCGCTTGCAAAATCGCATTGTCCTATAAAAATTACGGCAATATTTTTATACTAACGTATCAG	UACUAAC	UACUAAC	9	4		NA	NA	NA	No	YES	No	No	No	SPAC16.02c_intron6	UACUAAC	7	1	YES	No
I	4973031	4973243	213	-1	SPAC1952.04c	SPAC1952.04c.1:exon:2-SPAC1952.04c.1:exon:1	int_2272	2	1	1	0	0	2	1	2	A	UUUGCUAAUAC	15	2	Awan_Short;Awan_Long	7	8	7.22574	7.37138	4	1.5	3.98063	4.04111	GTATGAAATCAATGAATTAGTGTTAAAACAAGTGGATTGAGTACATTGTTTAAATGGCGAAGTGGAAATGGAACAATTGTAGAAACATTTTGTTTTCAGAAATTACGCACTTGTTTTTTATTAAAATTTGTCATTTAAAAATAGTTTCTAGCAGTCTTCTTGTTTTCCTTCTATTCTTTTCATCAGCACTTTTTGCTAATACTTTCTTTTTAG	UGCUAAU	UGCUAAU	15	2		NA	NA	NA	No	YES	No	NA	No	NA	NA	0	0	No	No
II	4319449	4319541	93	1	SPBC543.10	SPBC543.10.1:exon:2-SPBC543.10.1:exon:3	int_3344	13	13	0	0	0	12	3	1	A;A;A	AAUACUAACAU;AAAUACUAACA;CAAUGGCAGCU	13;14;26	10;2;1	Awan_Short	28	18	3.69431	4.29807	5.8	19	5.49247	5.41913	GTATGTTGTTTTTAATGAAAATTCTGAAAATCTTTTTTTTATTTTTATTTTCATTTATCACAATGGCAGCTGAAATACTAACATGGCATGTAG	UACUAAC	UACUAAC	13	10	AUGGCAG	26	1	NA	No	YES	No	NA	No	NA	NA	0	0	No	No
III	94832	94908	77	1	SPCC613.09	SPCC613.09.1:exon:1-SPCC613.09.1:exon:2	int_4374	6	6	0	0	0	5	2	1	A;A	UGUACUAAUUU;AUGUACUAAUU	18;19	4;2	Awan_Short	115	81	5.13107	4.79283	38.6667	41	4.68695	4.30349	GTAAGTATTTCGACCATTCAGCCTCTTACTCGTTGTATAATTTTTCTAGAAATGTACTAATTTCATTAAAATAACAG	UACUAAU	UACUAAU	18	4		NA	NA	NA	No	YES	No	NA	No	SPCC613.09_intron1	UACUAAU	16	3	YES	No
I	5329433	5329505	73	1	SPAP8A3.08	SPAP8A3.08.1:exon:2-SPAP8A3.08.1:exon:3	int_1108	8	8	0	0	0	6	1	1	A	AAUACUAAUUG	8	8	Awan_Short	259	210	5.52551	5.52187	10.4	15.0714	8.05048	7.97163	GTATGATTTCTTGTTATGGGTTTGGAGAGTTATACTCCTTAGCCGTGCATTAAGTGACAATACTAATTGGTAG	UACUAAU	UACUAAU	8	8		NA	NA	NA	No	YES	No	No	No	SPAP8A3.08_intron2	UACUAAU	6	5	YES	No
I	3426105	3426210	106	1	SPAC3H5.08c	SPAC3H5.08c.1:exon:1-SPAC3H5.08c.1:exon:2	int_706	17	17	0	0	0	14	2	1	A;A	AUAACUAACAA;UAUAACUAACA	14;15	15;2	Awan_Short	15	26	3.85702	4.74673	16	6.75	5.94796	5.95398	GTAAGTAGCTTTTGCAAAGGATTTATATTAGCATGTTCTTAAATTTGCGATAGTAATCCGGCGTACGTATGTCAATTTGATATGTATAACTAACAACGTAAATTAG	AACUAAC	AACUAAC	14	15		NA	NA	NA	No	YES	No	NA	No	SPAC3H5.08c_intron1	AACUAAC	12	8	YES	No
III	878319	878401	83	-1	SPCC16A11.05c	SPCC16A11.05c.1:exon:4-SPCC16A11.05c.1:exon:3	int_5064	16	16	0	0	0	13	2	1	A;A	UUUACUAACGC;AUUUACUAACG	16;17	10;6	Awan_Short	19	17	4.42671	4.09961	10	9	4.92297	5.05432	GTATGTTCTAATGTCGATATCTACTTGGATTAAGTCTATTTAATATTGTAGGCGGATTAATTTACTAACGCGTAACGGAATAG	UACUAAC	UACUAAC	16	10		NA	NA	NA	No	YES	No	NA	No	SPCC16A11.05c_intron3	UACUAAC	14	7	YES	No
II	3083649	3083741	93	1	SPBC30D10.09c	SPBC30D10.09c.1:exon:2-SPBC30D10.09c.1:exon:3	int_3034	13	13	0	0	0	8	2	1	A;A	AGUUAUAACAU;UAGUUAUAACA	12;13	12;1	Awan_Short	41	46	4.35989	4.96103	21	15.6667	4.30273	4.437	GTAGGTTTATTTTTCCGCCGAAGTAAAAAGCATATTCGTTGGTTTTACCATGAGTCGGATTTTTTATGAACATTAGTTATAACATTTGTACAG	UUAUAAC	UUAUAAC	12	12		NA	NA	NA	No	YES	YES	NA	YES	SPBC30D10.09c_intron2	UUAUAAC	10	2	YES	No
I	180722	180889	168	1	SPAC13G6.04	SPAC13G6.04.1:exon:2-SPAC13G6.04.1:exon:3	int_8	5	1	4	0	0	4	2	2	A;A	UCAUCUAAGUU;UUAGCUAACGU	58;10	4;1	Awan_Long;Awan_Short	19	13	8.18652	8.68225	1.42857	1.55556	7.48769	7.06365	GTATGCTCTTGAAAAATTTGGTTTTCTATTTTGTTGGCTTGGGTTCTCGTGTTAACGATTGCTACTCAACTAGATGAGCAAAGTTATTGTAGAGCCTAAGACATCATCTAAGTTACTCTAAACTTCTGAAGTTTTAACTTTCCTTTATATATTAGCTAACGTTACCAG	AGCUAAC	AUCUAAG	58	4	AGCUAAC	10	1	NA	YES	No	YES	No	No	NA	NA	0	0	No	No
I	591247	591417	171	1	SPAC3H8.03	SPAC3H8.03.1:exon:1-SPAC3H8.03.1:exon:2	int_92	14	6	8	0	0	11	2	2	A;A	UUUUCUAACAA;UUUUUCUAACA	18;19	13;1	Awan_Short;Awan_Long	14	12	6.29302	6.23244	5	13	3.97764	3.94924	GTAAGTATACATATTCCGTCAGCAGTAATCTCTTGGCTAAAGAAAGTACAAGTAAAGTCACTATGCTGCGGAAATTGTTCTATCAACTTTTTGCTTTAACGGCCAACCCAAGTTTATTTTAACTTCTTTTATTCGTTCTCTTTTTTTTTTCTAACAATATTTTATCAATAG	UUCUAAC	UUCUAAC	18	13		NA	NA	NA	No	YES	No	NA	No	SPAC3H8.03_intron1	UUCUAAC	16	1	YES	No
I	5206957	5207060	104	1	SPAC19D5.03	SPAC19D5.03.1:exon:1-SPAC19D5.03.1:exon:2	int_1078	18	18	0	0	0	11	2	1	A;A	AAUUCUAAUGA;CAAUUCUAAUG	16;17	17;1	Awan_Short	8	3	5.49522	6.05432	1.125	2	3.77046	3.37691	GTATGTTTGAATATAAATTTAGGACTGTCTCAATTATGTAGTTAACGAGAGTGGAGACTTTACCAAATATTGATAATGTCCAATTCTAATGATATGTGACTTAG	UUCUAAU	UUCUAAU	16	17		NA	NA	NA	No	YES	No	No	No	SPAC19D5.03_intron1	UUCUAAU	14	2	YES	No
III	216499	216590	92	1	SPCC1235.15	SPCC1235.15.1:exon:3-SPCC1235.15.1:exon:4	int_4411	6	6	0	0	0	6	2	1	A;A	CUUGCUAACCA;UCUUGCUAACC	11;12	4;2	Awan_Short	39	31	4.60681	4.6673	40	32	4.91663	5.13009	GTAAGATTGAATTTTAGTATTTTTAGATAGCTTAAAAAGTCGTCGAATTACTTTGATGTTGTTTACTTTAGTATCTTGCTAACCAACACAAG	UGCUAAC	UGCUAAC	11	4		NA	NA	NA	No	YES	No	NA	No	SPCC1235.15_intron3	UGCUAAC	9	2	YES	No
III	1830973	1831087	115	-1	SPCC285.16c	SPCC285.16c.1:exon:2-SPCC285.16c.1:exon:1	int_5229	10	10	0	0	0	10	2	1	A;A	AUGACUAACAA;UAUGACUAACA	12;13	8;2	Awan_Short	14	8	3.73945	4.49423	7.5	4.5	4.09209	3.90406	GTATGGGTAATTGAGTGATACATATTACTTTAGAAGAATAAAAGGGGAAATACGCACTTTACCCCTATATTAACCAGATTTTTGTTTTAATTAATTATGACTAACAATATGCTAG	GACUAAC	GACUAAC	12	8		NA	NA	NA	No	YES	No	No	No	SPCC285.16c_intron1	GACUAAC	10	1	YES	No
I	1334922	1335029	108	-1	SPAC6F12.11c	SPAC6F12.11c.1:exon:2-SPAC6F12.11c.1:exon:1	int_1423	14	14	0	0	0	12	1	1	A	AAUACUAACAA	11	14	Awan_Short	19	19	2.79052	3.43597	20	10	2.33896	2.36774	GTAAATTGCTAAAAAAGTATAGGAATGACCGGCTTACATCTTTAAGCTTCCCCTTTTATAAAACATGAATTTGATAATCTTTTTTGACCTAATACTAACAATTTCTAG	UACUAAC	UACUAAC	11	14		NA	NA	NA	No	YES	No	NA	No	SPAC6F12.11c_intron1	UACUAAC	9	3	YES	No
I	228233	228311	79	-1	SPAC24B11.12c	SPAC24B11.12c.1:exon:2-SPAC24B11.12c.1:exon:1	int_1151	9	9	0	0	0	8	2	1	A;A	UUUACUAACGU;CUUUACUAACG	13;14	7;2	Awan_Short	6	7	1.65667	1.36352	7	8	4.54477	4.3938	GTATGCTTTCTTATTCTCATCACGATTGAAATCACCAATTATCTTGGTTCATTTTTTTCTTTACTAACGTTTTATGTAG	UACUAAC	UACUAAC	13	7		NA	NA	NA	No	YES	No	No	No	SPAC24B11.12c_intron1	UACUAAC	11	3	YES	No
I	4083770	4083947	178	1	SPAC23A1.03	SPAC23A1.03.1:exon:1-SPAC23A1.03.1:exon:2	int_849	14	10	4	0	0	13	4	2	A;A;A;A	GAUGCUAAUGU;AGAUGCUAAUG;UAUAAACAAUA;AUUCGAGAGGU	10;11;22;78	11;1;1;1	Awan_Short;Awan_Long	26	8	8.84666	9.07574	0.9	0.321429	7.28895	7.3072	GTAAGATTTTATAGAAGGAGGAAATGCGCGAGGTTGGATAGGAACGGTGATATTATTTTGCTCAATTAGCGTGAAGTTTGAATCCAAAATACAATTCGAGAGGTTATATTATCTTTACGCCTTGCAATTGCTTAAATACTCTGTTAAATTATAAACAATAAGATGCTAATGTTATTAG	UGCUAAU	UGCUAAU	10	11	UAAACAA	22	1	NA	No	YES	No	YES	No	SPAC23A1.03_intron1	UGCUAAU	8	3	YES	No
II	2272431	2272510	80	-1	SPBC16H5.13	SPBC16H5.13.1:exon:3-SPBC16H5.13.1:exon:2	int_3833	15	15	0	0	0	11	2	1	A;A	CUUGCUAACAU;UCUUGCUAACA	12;13	13;2	Awan_Short	86	60	3.05356	3.34537	17.4	12.2	5.36577	5.47788	GTATGTTGAGCAACTCTCATTAGCCGAGCAGCAATTATCAAATTCATTATTTAACTTATTTCTTGCTAACATTTTCTCAG	UGCUAAC	UGCUAAC	12	13		NA	NA	NA	No	YES	No	No	No	SPBC16H5.13_intron2	UGCUAAC	10	1	YES	No
II	546465	546589	125	-1	SPBC354.02c	SPBC354.02c.1:exon:5-SPBC354.02c.1:exon:4	int_3478	2	2	0	0	0	2	1	1	A	UUUACUAACCA	11	2	Awan_Short	120	76	6.15789	6.52806	20.1667	12.8333	7.42757	6.93739	GTATGTTTTTAAGAAATATGGATGAGTGAAGGTATTGTAACCATCACTGACAAGAGATTACTCTTTAACTTCCTTATTTTTCATTTTTTAAAAAATGTGTTTATGCATTTACTAACCATTATAAG	UACUAAC	UACUAAC	11	2		NA	NA	NA	No	YES	No	NA	No	SPBC354.02c_intron4	UACUAAC	9	1	YES	No
II	2605022	2605112	91	-1	SPBC25B2.04c	SPBC25B2.04c.1:exon:2-SPBC25B2.04c.1:exon:1	int_3892	3	3	0	0	0	3	3	1	A;A;A	UCUACUAACUG;AUCUACUAACU;AAGUUUGAAAG	10;11;43	1;1;1	Awan_Short	25	28	2.56813	3.24697	4.33333	4.14286	4.19406	3.92972	GTAAATGCTATTGAGTTTGAGTTTAATTTTCAATTTTTTACAAGTTTGAAAGGCTTTTAATATTATCGAAAGTATCTACTAACTGCTTTAG	UACUAAC	GUUUGAA	43	1	UACUAAC	10	1	NA	YES	No	No	NA	No	SPBC25B2.04c_intron1	UACUAAC	8	1	YES	No
I	3042910	3043095	186	-1	SPAC24C9.16c	SPAC24C9.16c.1:exon:3-SPAC24C9.16c.1:exon:2	int_1827	31	9	22	0	0	20	3	2	A;A;A	UUAUCUAACCU;UUUAUCUAACC;CCAACUUAUUA	13;14;58	28;2;1	Awan_Short;Awan_Long	8	8	6.20701	6.20496	1.28571	1.5	3.59121	4.23666	GTATGTTGGTGAACTAGATTTGAGTCCTATGCATCTGTAATTTGGTAAAAGCAGCTTTACCAGGAATGGCATCTCACTTGCAAAAAAAATTACTTCTACAGTAAAAAAAATGCATAGAAAGCCAACTTATTAGAGGAACATTTCCTTTCCTTTTCTTTATGAAGATTTATCTAACCTAGAATTCAG	AUCUAAC	AUCUAAC	13	28	AACUUAU	58	1	NA	No	YES	No	NA	No	NA	NA	0	0	No	No
II	2492148	2492219	72	1	SPBC557.04	SPBC557.04.1:exon:1-SPBC557.04.1:exon:2	int_2903	13	13	0	0	0	11	2	1	A;A	UUUACUAACAU;UUUUACUAACA	14;15	10;3	Awan_Short	22	7	4.33484	4.02094	2.09091	1	5.49393	5.1648	GTATAATTTTTGGGTTGGATGGATCGAGGAGTATTACAATGAAAGATTTATTTTACTAACATTTTTCATTAG	UACUAAC	UACUAAC	14	10		NA	NA	NA	No	YES	No	No	No	SPBC557.04_intron2	UACUAAC	12	1	YES	No
II	2466573	2466650	78	1	SPBC12C2.05c	SPBC12C2.05c.1:exon:4-SPBC12C2.05c.1:exon:5	int_2898	18	18	0	0	0	15	2	1	A;A	CAGGCUAAUUU;ACAGGCUAAUU	9;10	13;5	Awan_Short	7	2	4.21937	3.62982	4	3	2.26398	2.20787	GTATGTAAAATATTGGAACCTGTCAAGCAATTGAAGTTAGATGGATATTGAATTCCTGTTCACAGGCTAATTTTATAG	GGCUAAU	GGCUAAU	9	13		NA	NA	NA	No	YES	No	NA	No	SPBC12C2.05c_intron4	GGCUAAU	7	8	YES	No
I	5004953	5005120	168	1	SPAC890.03	SPAC890.03.1:exon:3-SPAC890.03.1:exon:4	int_1047	10	10	0	0	0	8	1	1	A	CUUGCUAACAU	15	10	Awan_Short	6	6	6.84735	7.07588	3.5	7	2.31659	2.8308	GTATGGGTTATTCAAAGATTACTATGTCTCTAAGTTATAAAAAGAAGAATAAACGGCTCGTAAATTGCGAATATTGACCGTTCCAAAGTCGGTTGATTACATTATGAGAATGATAAACGTTTTATTCATCAATAAATTGATTGTACCTTGCTAACATTTTTATTAAAG	UGCUAAC	UGCUAAC	15	10		NA	NA	NA	No	YES	No	NA	No	SPAC890.03_intron3	UGCUAAC	13	4	YES	No
I	1516664	1516788	125	-1	SPAC57A7.12	SPAC57A7.12.1:exon:2-SPAC57A7.12.1:exon:1	int_1477	22	14	8	0	0	17	3	2	A;A;A	GAAGCUAACAA;AGAAGCUAACA;UGCAGGCAGAC	13;14;53	20;1;1	Awan_Short;Awan_Long	145	79	5.17789	5.19337	48.6667	80	6.35424	6.14426	GTAAGAAAATTTTTTTACTTGGAGAAATGAGTAATCTCCTAGTTCATTCGCATAGACTTGCTTTATGCAGGCAGACGAGAATCCTTAGTAAATTTTCAAATTAAAGAAGCTAACAAATCAAACAG	AGCUAAC	AGCUAAC	13	20	CAGGCAG	53	1	NA	No	YES	No	NA	No	SPAC57A7.12_intron1	AGCUAAC	11	4	YES	No
III	1042781	1042842	62	-1	SPCC1259.05c	SPCC1259.05c.1:exon:2-SPCC1259.05c.1:exon:1	int_5098	10	10	0	0	0	7	1	1	A	GAAACUGACGA	13	10	Awan_Short	460	299	5.63074	5.41354	30.7333	33.3333	7.36295	7.096	GTAAGGAATGGTTTTGAATAACGCCGTATGTCTGAATCCGCTGAAACTGACGAATTTATTAG	AACUGAC	AACUGAC	13	10		NA	NA	NA	No	YES	No	No	No	NA	NA	0	0	No	No
I	4874290	4874383	94	1	SPAC4F10.20	SPAC4F10.20.1:exon:1-SPAC4F10.20.1:exon:2	int_1004	39	39	0	0	0	28	3	1	A;A;A	GGUACUAACAU;GGGUACUAACA;CUUUUACAGGG	14;15;23	35;3;1	Awan_Short	1460	1111	7.83212	8.03157	97.4	85.5385	9.53769	9.35794	GTACGTATCCGTTTGGCTAGAATCAGAGATTAACCACAATGTCGCTGAATTTTGGTAAAATGTTCTTTTACAGGGTACTAACATTTCTGTATAG	UACUAAC	UACUAAC	14	35	UUUACAG	23	1	NA	No	YES	No	NA	No	SPAC4F10.20_intron1	UACUAAC	12	16	YES	No
II	493481	493583	103	-1	SPBC902.05c	SPBC902.05c.1:exon:2-SPBC902.05c.1:exon:1	int_3471	3	3	0	0	0	3	1	1	A	UAUAUUAACAG	16	3	Awan_Short	167	133	4.36141	4.53539	168	134	6.57835	6.55966	GTAAGTTGTGAATTGGCTCCTAAGCGATAAATCGCTGGTTTAAGCAGCCTTACTCGTCTTTTCATGATTATTTGATCGATTATATTAACAGAGTTATTTTTAG	UAUUAAC	UAUUAAC	16	3		NA	NA	NA	No	YES	No	No	No	SPBC902.05c_intron1	UAUUAAC	14	1	YES	No
II	3523146	3523223	78	1	SPBC1105.09	SPBC1105.09.1:exon:2-SPBC1105.09.1:exon:3	int_3187	6	6	0	0	0	6	1	1	A	GUCACUAACCU	15	6	Awan_Short	210	143	3.79052	4.3819	105.5	48	7.37548	7.26556	GTATGTATTTATGTTTCACAGAAAAATAATATTTGTTGTATAAGGTAAACAAGCTGGTCACTAACCTCGAAAAATTAG	CACUAAC	CACUAAC	15	6		NA	NA	NA	No	YES	No	NA	No	SPBC1105.09_intron2	CACUAAC	13	2	YES	No
II	969266	969450	185	-1	SPBP35G2.04c	SPBP35G2.04c.1:exon:3-SPBP35G2.04c.1:exon:2	int_3564	5	5	0	0	0	5	1	1	A	CAUACUAACCG	17	5	Awan_Short	8	0	5.57202	5.63576	9	1	2.87299	1.25791	GTAAGTTTTACATAAATTTTAAGCGGACTACTATGTAAGGGATCTTATCCAAAAGACGTATCTGCAATTTTTAGGGTTGATAATGTTATACCTTTGCATGTAGTTAAATTCAACGTTCGTTGATATAATATGCCAATGTTTAACACGTTTTCTTAATGATGCATACTAACCGACTACTTACTTAG	UACUAAC	UACUAAC	17	5		NA	NA	NA	No	YES	No	NA	No	NA	NA	0	0	No	No
II	3229867	3230017	151	-1	SPBC19F8.01c	SPBC19F8.01c.1:exon:4-SPBC19F8.01c.1:exon:3	int_4067	15	10	5	0	0	10	2	2	A;A	UUUUCUAACGA;GUUUUCUAACG	12;13	11;4	Awan_Short;Awan_Long	2	6	5.72204	5.83828	0.428571	0.875	3.34446	3.57214	GTACGAAATCTGCAAACAAAGTTTTTCCGTCCTTAACTATTTCAATCAAGTTACTTCCATTACTTGATTTAATGTTGTTAAGTAGAAAACCAAGAGAACACATTGGTTTAAGAATGAGGAATGAAAAAAAAGTTTTCTAACGATATTTTAG	UUCUAAC	UUCUAAC	12	11		NA	NA	NA	No	YES	No	NA	No	SPBC19F8.01c_intron3	UUCUAAC	10	6	YES	No
II	1785749	1785936	188	-1	SPBC18H10.08c	SPBC18H10.08c.1:five_prime_UTR:2-SPBC18H10.08c.1:exon:3	int_3729	17	10	7	0	0	14	2	2	A;A	AAUACUAACAU;GAAUACUAACA	14;15	16;1	Awan_Short;Awan_Long	0	0	6.69434	6.79921	0.5	1	-0.711955	-16.6096	GTATCGACATTGTACATAGTATTTTTTTTAATGCTCAAAACACGAAAATTTTGTATTCAAAGCTCCCTAGCCTTCTCGTCAGATAAATTTGATATAGTTGACGAGACTGTACTAATTATGATCTTTGAAGCAAACTTAATTTATTTTTTGTTCAAGTTACAATCTTGAATACTAACATGTCCTTTTAG	UACUAAC	UACUAAC	14	16		NA	NA	NA	No	YES	No	NA	No	SPBC18H10.08c_intron3	UACUAAC	12	1	YES	No
I	511509	511661	153	1	SPAC227.09	SPAC227.09.1:five_prime_UTR:1-SPAC227.09.1:exon:1	int_79	11	10	1	0	0	10	3	2	A;A;A	UUUACUAACAU;CAUACUAAUUU;UUUUACUAACA	19;11;20	8;2;1	Awan_Short;Awan_Long	0	1	0.925459	1.86935	1	2	-1.93734	-0.645562	GTATGTTTGAAACCTAAGTAAAGAATGATATTATGCAGCATACGAATAAAATAACTTTTATAAAACATATTCTTTTTATCTAAAATTTACCTCGTCAGAGACATAACTAATTGCTTCTGTTGAGAATTTTACTAACATACTAATTTGCAACAG	UACUAAU	UACUAAC	19	8	UACUAAU	11	2	NA	YES	No	No	NA	No	SPAC227.09_intron1	UACUAAC	17	1	YES	No
I	5023176	5023273	98	-1	SPAC22E12.03c	SPAC22E12.03c.1:exon:2-SPAC22E12.03c.1:exon:1	int_2288	13	13	0	0	0	9	2	1	A;A	UAUGCUAACAU;AUAUGCUAACA	17;18	9;4	Awan_Short	121	101	3.0827	2.63755	122	51	6.9102	6.84807	GTAAGTTGCATAAGACAAAACGAAGTCCAACAAGCTGATTCGTTTCTGTTTTTTTTTATTTCTTCATTAACCTATATGCTAACATGTTCTTTCATTAG	UGCUAAC	UGCUAAC	17	9		NA	NA	NA	No	YES	No	NA	No	SPAC22E12.03c_intron1	UGCUAAC;AUGCUAA	15;16	1;1	YES	No
III	2140844	2141010	167	-1	SPCC126.13c	SPCC126.13c.1:exon:2-SPCC126.13c.1:exon:1	int_5294	16	13	3	0	0	14	3	2	A;A;A	UAUGCUAACGA;UUAUGCUAACG;UCCAUGAACAA	14;15;68	12;3;1	Awan_Short;Awan_Long	9	8	6.89265	6.98403	3.33333	9	3.7023	4.13043	GTAAGTAAATCGTGTTAACGGGAAAATTTCAGTTGTTGTATATGAACTCATACTTCATTGGGACTACGATTAGAAAATCCGTCAAAGGATCATCCATGAACAATTTATATGTCAATTAGATTTATATGTTTCAAATCTTAAACTTTTATGCTAACGATTAATCTTAG	UGCUAAC	UGCUAAC	14	12	CAUGAAC	68	1	NA	No	YES	No	NA	No	SPCC126.13c_intron1	UGCUAAC	12	4	YES	No
I	2629820	2629908	89	-1	SPAC7D4.05	SPAC7D4.05.1:exon:3-SPAC7D4.05.1:exon:2	int_1744	1	1	0	0	0	1	1	1	A	ACAUGCUAACA	11	1	Awan_Short	5	0	-0.100233	2.36149	6	1	2.45662	2.60642	GTATGTGTCTGAATTTCATTGAGATTTGTGTTTTGTAAAGAATTGAATCTCTTGATTTCTAAAAAACCTTTACATGCTAACAATTTTAG	UGCUAAC	AUGCUAA	11	1		NA	NA	NA	No	No	No	No	No	NA	NA	0	0	No	No
II	1714174	1714256	83	1	SPBC2F12.12c	SPBC2F12.12c.1:exon:4-SPBC2F12.12c.1:exon:5	int_2727	16	16	0	0	0	7	2	1	A;A	UGUCCUAACCA;UUGUCCUAACC	17;18	15;1	Awan_Short	26	18	3.70089	2.29226	13.5	19	4.4101	4.38309	GTAAGATATTTGTGTTTTTCATAATATTAACTCTCTTCCAAATTACGATTTCCATCTTTTGTCCTAACCAAAATCTTTTCTAG	UCCUAAC	UCCUAAC	17	15		NA	NA	NA	No	YES	No	NA	No	SPBC2F12.12c_intron4	UCCUAAC	15	1	YES	No
II	3685151	3685231	81	-1	SPBP8B7.24c	SPBP8B7.24c.1:exon:2-SPBP8B7.24c.1:exon:1	int_4195	2	2	0	0	0	1	1	1	A	UAGGCUAAUUA	12	2	Awan_Short	37	25	7.86536	8.30186	1.80952	3.71429	6.07592	5.92603	GTATGTGTCAAAAACTTATAGAAGTTGTTTTTTGGACAGCATTGTAGAATACCTGGAACTAGTAGGCTAATTAATAATCAG	GGCUAAU	GGCUAAU	12	2		NA	NA	NA	No	YES	No	No	No	NA	NA	0	0	No	No
II	754971	755149	179	1	SPBC577.02	SPBC577.02.1:exon:2-SPBC577.02.1:exon:3	int_2486	43	33	10	0	0	24	4	2	A;A;A;A	CAAGCUAACAA;GAACUCAAGCU;UCAUAUAAGUG;UUUCCUUAAAG	15;20;30;112	34;4;4;1	Awan_Short;Awan_Long	336	309	8.42402	8.63881	48.1429	38.75	9.52382	9.71939	GTATGTTATATAAACTACTAAGAAAGATTAACTCAGTTACTTTTTATTGAGGGAACTACATTTCCTTAAAGCATTTTGCGAAGGAATTCTTCCTAAAGCGTTGATAATTCGTGAAACAAATGATCAGCTCTGAGTTAATCGTTCATATAAGTGAACTCAAGCTAACAAGTTTTCTATAG	AGCUAAC	AGCUAAC	15	34	ACUCAAG	20	4	NA	No	YES	No	NA	No	SPBC577.02_intron2	AGCUAAC	13	3	YES	No
II	1199242	1199376	135	-1	SPBC4.07c	SPBC4.07c.1:exon:2-SPBC4.07c.1:exon:1	int_3626	13	7	6	0	0	10	2	2	A;A	AAUCCUAACUC;AAGACUGAAUU	12;97	12;1	Awan_Short;Awan_Long	170	130	6.7333	7.14507	24.4286	65.5	7.08598	7.02549	GTAAGTATTTGAGTATTTTGAGGCTGAAAACAAGACTGAATTAAATGTAATTTTTTCATCTATCGCTGAATAGTCTTGTTTTCACTCTATCACATTCTTTTCATGTTTTAATATTTAATCCTAACTCTCCTATAG	UCCUAAC	UCCUAAC	12	12	GACUGAA	97	1	NA	No	YES	No	NA	No	SPBC4.07c_intron1	UCCUAAC	10	4	YES	No
I	3431390	3431480	91	1	SPAC3H5.06c	SPAC3H5.06c.1:exon:1-SPAC3H5.06c.1:exon:2	int_708	30	30	0	0	0	20	2	1	A;A	UUCACUAACAG;UUUCACUAACA	12;13	26;4	Awan_Short	23	24	2.32712	3.55182	8	12.5	5.29954	5.54452	GTATGTTTATTGCACTGTTACATGTGTCTATATTAAGGCACAAGCTAGCGTCTATTTTATAGGGTATGCCATTTCACTAACAGTAATTTAG	CACUAAC	CACUAAC	12	26		NA	NA	NA	No	YES	No	NA	No	SPAC3H5.06c_intron1	CACUAAC	10	4	YES	No
I	388622	388720	99	1	SPAC31A2.02	SPAC31A2.02.1:exon:2-SPAC31A2.02.1:exon:3	int_46	15	15	0	0	0	11	1	1	A	CAAUCUAACCA	11	15	Awan_Short	7	16	5.17239	5.48089	1.6	4.25	5.49748	5.62423	GTTTGTGCTCTTATAGTTGGATTGATGAAGAAATGATATGTTGTGTCGGATTAAAATTTTCATAATCCAATGTTGTTAAGCCAATCTAACCATAACTAG	AUCUAAC	AUCUAAC	11	15		NA	NA	NA	No	YES	No	NA	No	SPAC31A2.02_intron2	AUCUAAC	9	2	YES	No
I	301264	301435	172	-1	SPAC18B11.10	SPAC18B11.10.1:exon:3-SPAC18B11.10.1:exon:2	int_1173	16	12	4	0	0	13	2	2	A;A	UUUACUAACAU;AUUUACUAACA	10;11	15;1	Awan_Short;Awan_Long	17	12	7.59127	7.58976	3.6	13	5.00961	4.78898	GTAAGTTTTTATATGTTAAAGGTATCGAGGGATTATATAGTATCTACTTCTTTTCTGTGAAATTCATCATTATTTTATAATAGCATACGTGTCGCTCGAGATTTATATGCTTGAAGTAAAAAAAAAAAAACCTTTATAACATCTGTCTTCACCAATTTACTAACATTTATAG	UACUAAC	UACUAAC	10	15		NA	NA	NA	No	YES	No	No	No	NA	NA	0	0	No	No
II	1238601	1238820	220	-1	SPBC651.01c	SPBC651.01c.1:exon:4-SPBC651.01c.1:exon:3	int_3629	8	1	7	0	0	7	2	2	A;A	UUCACUAACAA;CUGUGUUACUC	12;107	7;1	Awan_Long;Awan_Short	189	128	11.0254	10.9899	21.1111	18.4286	6.49096	6.22189	GTAAGTATTTGCCAAAGAAATGGATGCCTGCAGTCACTGTTAAAGAATGAGAAATGATGCTTTAACGTGTTTGGTGTGAATTCTTATGTGCACAGTATTCTTAACACTGTGTTACTCCTATTGATTTTTTAAGTGTTTAATTGTGTTGGAATTCTCAGCAGCATCGTGAATCTTTCCTTATTTCCATATCACTATCTATGGTTCACTAACAATTTCTTAG	CACUAAC	CACUAAC	12	7	GUGUUAC	107	1	NA	No	YES	No	YES	No	NA	NA	0	0	No	No
III	416533	416615	83	-1	SPCC306.05c	SPCC306.05c.1:exon:3-SPCC306.05c.1:exon:2	int_4936	6	6	0	0	0	5	2	1	A;A	UCAGCUAACAA;AUCAGCUAACA	10;11	4;2	Awan_Short	8	4	4.12973	3.81582	4.5	5	5.71132	5.6673	GTATGTTAGTTGTTATCCATCAACTGCCTACCAAAGGCTGCTCCAGTATTTTCAAACATTCGTTTATCAGCTAACAAATTTAG	AGCUAAC	AGCUAAC	10	4		NA	NA	NA	No	YES	No	NA	No	SPCC306.05c_intron2	AGCUAAC	8	2	YES	No
I	4490712	4490836	125	1	SPAC17C9.05c	SPAC17C9.05c.1:exon:2-SPAC17C9.05c.1:exon:3	int_906	24	18	6	0	0	13	2	2	A;A	AGUACUAAUUA;GAGUACUAAUU	9;10	22;2	Awan_Short;Awan_Long	4	5	2.65763	2.50887	1.25	3	2.96045	3.83722	GTAAGTAATTGTTTAAATAACTAAATTCTTTAAGAAAAACGAGTTAAAGTTTACACTAAGGGAAAATGATATGATGATTATCTTTCATATTAAATTTAAATTTTGCTCGAGTACTAATTAATTAG	UACUAAU	UACUAAU	9	22		NA	NA	NA	No	YES	No	NA	No	SPAC17C9.05c_intron2	UACUAAU	7	6	YES	No
I	1710550	1710692	143	-1	SPAC664.04c	SPAC664.04c.1:exon:2-SPAC664.04c.1:exon:1	int_1529	20	12	8	0	0	14	2	2	A;A	UAUACUAACUG;UUAUACUAACU	11;12	16;4	Awan_Short;Awan_Long	13	18	7.90036	8.15309	1.55556	3.8	9.09684	8.91874	GTTTGTTTATTATTGAATTTCAAGCAACTTTATTTAGTTTTGGACATAACGCATTTAAGCTTTTTTGTGCTTTGTCTACTGAAGCATTTGGTTGCCTGTCTATATTCACTGTGTTTTTGTATTTTTATACTAACTGTTTCTAG	UACUAAC	UACUAAC	11	16		NA	NA	NA	No	YES	No	No	No	SPAC664.04c_intron1	UACUAAC	9	1	YES	No
III	2001332	2001428	97	1	SPCC290.04	SPCC290.04.1:exon:1-SPCC290.04.1:exon:2	int_4757	2	2	0	0	0	2	1	1	A	UUUUCUAAUGU	18	2	Awan_Short	9	11	2.68246	3.06739	3.33333	6	4.41355	4.59614	GTATGTCTTGCTTTTCCAGCTAAATGGCTTTGCTCTTTAGCTCTTCATTTGTCTTTCATAATTTTATTCATTTTTTCTAATGTTTGTCTGTGTTTAG	UUCUAAU	UUCUAAU	18	2		NA	NA	NA	No	YES	No	NA	No	SPCC290.04_intron1	UUCUAAU	16	1	YES	No
III	1993002	1993175	174	1	SPCC290.02	SPCC290.02.1:exon:1-SPCC290.02.1:exon:2	int_4756	1	1	0	0	0	1	1	1	A	AAUGCUAACAU	16	1	Awan_Short	91	61	6.15171	6.17855	5.75	6.88889	5.94268	5.96725	GTAAGTCGGTACTCACCGAAAAGTTTAACTGTTTAAGCTTTTCGTTGTTGATCAAGTTTTAAATGTCAGAAACTCAATGCATTTCTTGATCTCTTATTGTAGTATAATATAAAGTTTTTACGCCAATTTTAATCATGATTTTTGTTTTGTCAATGCTAACATTCTTCTTTTTAG	UGCUAAC	UGCUAAC	16	1		NA	NA	NA	No	YES	No	No	No	NA	NA	0	0	No	No
III	2201525	2201628	104	1	SPCC830.10	SPCC830.10.1:exon:1-SPCC830.10.1:exon:2	int_4822	22	22	0	0	0	21	3	1	A;A;A	AUAACUAACAA;GAUAACUAACA;CAGCGGAAUGA	20;21;30	19;2;1	Awan_Short	45	34	5.55769	5.63928	46	17.5	4.75963	4.69155	GTAAGTCAATTTTGGAAGGATTCTTCATAATTAATTAATGTGCGGTATCTGCATCTTCAATATTTTTCAGCGGAATGATAACTAACAAGATTGCTGTCCCATAG	AACUAAC	AACUAAC	20	19	GCGGAAU	30	1	NA	No	YES	No	NA	No	SPCC830.10_intron1	AACUAAC	18	4	YES	No
II	2608106	2608307	202	-1	SPBC25B2.06c	SPBC25B2.06c.1:exon:2-SPBC25B2.06c.1:exon:1	int_3893	4	2	2	0	0	4	2	2	A;A	UUGUCUAACCC;CAAAUUAAUGG	11;129	2;2	Awan_Long;Awan_Short	8	5	6.86956	6.92497	4.5	3	4.36038	4.1047	GTAAGTATTTTTGCTATTTGAACTTCTGCGTACCTTGAGTCTCAGTTCTTGTATGAACTTTACTCTCAAATTAATGGTTGTTTGCGTAGTTAATTATTTTGGATTTATTGTTAAATCGTTCATGTTTTGTTTAACGATTTCCAAACAAAAAAAGTCTGAATATTTTACCTCTCCTTCAAAGAGTTTGTCTAACCCTAGCTAG	GUCUAAC	AAUUAAU	129	2	GUCUAAC	11	2	NA	YES	No	No	NA	No	NA	NA	0	0	No	No
I	482186	482285	100	-1	SPAC24H6.05	SPAC24H6.05.1:five_prime_UTR:2-SPAC24H6.05.1:exon:1	int_1215	5	5	0	0	0	2	1	1	A	AGUACUAACUG	13	5	Awan_Short	3	1	6.82966	7.44971	2	0.4	-0.121686	0.170125	GTAAGTTTAAAAAGAACTTGATGCCTGTTAGTTTCGGGCATCCTTCTCTCCTCAAGTTGGATTCCTGTTGATGCTTCTCAAGTACTAACTGCTGGTTCAG	UACUAAC	UACUAAC	13	5		NA	NA	NA	No	YES	No	NA	No	NA	NA	0	0	No	No
II	3157718	3157859	142	1	SPBC609.01	SPBC609.01.1:exon:1-SPBC609.01.1:exon:2	int_3049	8	3	5	0	0	7	5	2	A;A;A;A;A	UUCUACCAGAG;AUCACUAACUC;UAUCACUAACU;CUACCAGAGUA;AUGAAAUAAGU	30;14;15;28;98	4;1;1;1;1	Awan_Long;Awan_Short	0	0	4.51114	4.13226	0.5	1	1.2551	0.6128	GTAAGTTTTGTCAAGTTCGATGAAGTATCCTGCAACTATGAAATAAGTTTTTCTTTGAATTTTGAATTTTTTTTTTTCATCTTGCTAGATTCTTCAGCTTTTTTCTTCTACCAGAGTATTTATCACTAACTCAGTTATTTAG	CACUAAC	CUACCAG	30	4	CACUAAC	14	1	NA	YES	No	YES	No	No	NA	NA	0	0	No	No
I	1368726	1368807	82	1	SPAC57A10.03	SPAC57A10.03.1:exon:4-SPAC57A10.03.1:exon:5	int_315	3	3	0	0	0	2	1	1	A	CAUUCUUAUUA	13	3	Awan_Short	16	12	3.66179	3.83331	2.42857	1.85714	3.91154	3.5933	GTAGGCAAAGCTTTATAAATCGGCATTCACCGATTGTTTGCATCTTTATTACGAAGTTTTCACATTCTTATTAATTGATTAG	AAUUGAU	UUCUUAU	13	3		NA	NA	NA	No	No	No	No	No	NA	NA	0	0	No	No
I	642132	642217	86	-1	SPAC1D4.03c	SPAC1D4.03c.1:exon:2-SPAC1D4.03c.1:exon:1	int_1251	33	33	0	0	0	25	3	1	A;A;A	UUUGCUAACUA;CUUUGCUAACU;UGGGCUCAUUU	13;14;26	22;10;1	Awan_Short	33	21	5.28907	5.43086	17	11	3.62799	3.5089	GTACGTATACAATGATCTATTTTTCTTTACAATTTCAATACGATCGCTATCTTTGGGCTCATTTGCTTTGCTAACTATGTTTTTAG	UGCUAAC	UGCUAAC	13	22	GGCUCAU	26	1	NA	No	YES	No	No	No	SPAC1D4.03c_intron1	UGCUAAC	11	7	YES	No
II	1460623	1460761	139	1	SPBC32H8.05	SPBC32H8.05.1:exon:1-SPBC32H8.05.1:exon:2	int_2666	25	21	4	0	0	18	2	2	A;A	UUAUCUAACAA;AUUAUCUAACA	12;13	24;1	Awan_Short;Awan_Long	21	13	7.40883	7.45825	7.33333	2.8	4.46859	4.03343	GTATGTTGTATAGTATAGACAAATGAAGGGATTGAATGTCTTTTTTTTTGGTTTCGGAAACGGTTTATGTACAATGGAACCGTCTTTAAAACAATTGCCCTTCTCATACCTCTTTATCGATTATCTAACAAAGTAATAG	AUCUAAC	AUCUAAC	12	24		NA	NA	NA	No	YES	No	NA	No	SPBC32H8.05_intron1	AUCUAAC	10	7	YES	No
I	303232	303333	102	1	SPAC18B11.09c	SPAC18B11.09c.1:exon:1-SPAC18B11.09c.1:exon:2	int_15	13	13	0	0	0	10	3	1	A;A;A	UAUUCUAAUUA;AUAUUCUAAUU;AUUACUAAAUA	15;16;8	9;3;1	Awan_Short	4	1	5.56104	5.81505	0.454545	0.333333	3.98554	4.19196	GTAAGGCTAATGCTTAAAACTTGTCGAGCTAATATATCATCTTCGTTGACATGTTTGAAGTCACATTGAACGCAGGGAGATATTCTAATTACTAAATAACAG	UUCUAAU	UUCUAAU	15	9	UACUAAA	8	1	NA	YES	YES	No	YES	No	SPAC18B11.09c_intron1	UUCUAAU	13	1	YES	No
I	792950	793048	99	-1	SPAC16C9.02c	SPAC16C9.02c.1:exon:3-SPAC16C9.02c.1:exon:2	int_1295	14	14	0	0	0	10	2	1	A;A	AAUUUUAACAA;UAUUAGGAAGG	11;22	13;1	Awan_Short	41	29	5.9458	6.04917	7	3.75	5.55057	5.04302	GTAAGTTTTTAACATTCAATGTACCTCTCAAATCAAAGCCATGCTTTTTAGACAAGTACTTTGAACTTATTATTAGGAAGGAATTTTAACAAAAAATAG	UUUUAAC	UUUUAAC	11	13	UUAGGAA	22	1	NA	No	YES	No	YES	No	SPAC16C9.02c_intron2	UUUUAAC	9	3	YES	No
I	2773013	2773107	95	-1	SPAC1805.01c	SPAC1805.01c.1:exon:3-SPAC1805.01c.1:exon:2	int_1779	4	4	0	0	0	3	2	1	A;A	UUUUGCUAAUG;UUUGCUAAUGG	11;10	3;1	Awan_Short	10	10	2.39059	1.68241	5.5	11	3.22021	3.75303	GTGTGTTTTAAGATTACCAATTTTTAAATTTAAAATTGGGAGTGAAAATATTATTTATTTTTTTATATTTTTAATCTTTTTGCTAATGGATTTAG	UGCUAAU	UGCUAAU	10	1		NA	NA	NA	No	YES	No	No	No	NA	NA	0	0	No	No
I	1568870	1569063	194	1	SPAC1705.02	SPAC1705.02.1:exon:1-SPAC1705.02.1:exon:2	int_338	10	4	6	0	0	9	3	2	A;A;A	AUUACUAAUGU;AAUUACUAAUG;CUUGCUUAUUG	10;11;93	8;1;1	Awan_Short;Awan_Long	31	32	6.50349	6.72916	32	33	5.32968	5.6673	GTAAGTTTTAAACCTTTGAGAATGAAGAAGAAATTCTAAAAATTATTATCCCCCTCTCAGCAGGGAATAGCTGCGTTGAACTATCTCTTTTATACTTGCTTATTGATTTTTAGTATTCTTTTAGCCTTTTTCACATTCTGATATTCATTAAAATTAAAACTATATCTATAATTTGTAATTACTAATGTTACTAG	UACUAAU	UACUAAU	10	8	UGCUUAU	93	1	NA	No	YES	No	NA	No	SPAC1705.02_intron1	UGCUUAU	91	1	YES	No
I	3039996	3040087	92	-1	SPAC24C9.02c	SPAC24C9.02c.1:exon:2-SPAC24C9.02c.1:exon:1	int_1825	23	23	0	0	0	17	2	1	A;A	AAUACUAACUU;AAAUACUAACU	13;14	20;3	Awan_Short	49	35	5.57984	6.2312	50	18	5.23326	5.46537	GTAAGTTTTATGTTTCCGTTCACTTTGACAAGTATAGCATTTCCAGCTTATTACTTAATTTAACACTGCAAAAATACTAACTTACATATTAG	UACUAAC	UACUAAC	13	20		NA	NA	NA	No	YES	No	NA	No	SPAC24C9.02c_intron1	UACUAAC	11	7	YES	No
II	2100413	2100519	107	1	SPBC23G7.16	SPBC23G7.16.1:exon:2-SPBC23G7.16.1:exon:3	int_2800	20	20	0	0	0	15	2	1	A;A	UUUUCUAACCU;AUUUUCUAACC	9;10	18;2	Awan_Short	12	1	4.41538	4.41769	2.6	0.5	4.26001	0.966866	GTACGTTCGTTTATGAAGTTCTAGATAACTGTTGGTACAATTATTTTCATTGACTTTTTCCCGATTTATTATATTTTTTAAACGTTCGTTATTTTCTAACCTTGCAG	UUCUAAC	UUCUAAC	9	18		NA	NA	NA	No	YES	No	NA	No	SPBC23G7.16_intron2	UUCUAAC	7	6	YES	No
I	3279540	3279682	143	-1	SPAC6G9.16c	SPAC6G9.16c.1:exon:3-SPAC6G9.16c.1:exon:2	int_1880	13	10	3	0	0	9	1	2	A	UAUGCUAACAA	9	13	Awan_Short;Awan_Long	14	5	6.56876	6.5298	5	6	4.1601	4.59163	GTATGTTTATTGCAATACTGTAGTAGTTAATGAATTGCTGATTGTGTGATGACTTTCAAACCAAGGAATTTTTTTGTTCGTCGCATCTACCCCATTTTGCCAGTCGTTTTTGAGCTGATTAATTAAATATGCTAACAATTTAG	UGCUAAC	UGCUAAC	9	13		NA	NA	NA	No	YES	No	NA	No	SPAC6G9.16c_intron2	UGCUAAC	7	1	YES	No
I	3163312	3163422	111	1	SPAC3G9.10c	SPAC3G9.10c.1:exon:2-SPAC3G9.10c.1:exon:3	int_663	54	54	0	0	0	25	3	1	A;A;A	UGUGCUAAUAU;GUGUGCUAAUA;UGUAUUAAUCU	14;15;30	49;4;1	Awan_Short	54	21	4.33596	4.85016	27.5	11	5.80844	4.73769	GTAAGCCAATTCATTTATGGGAAATGAAAAAGAAACTTAAAATTTACATTCAAACATCTATGATTCTTATAAAATGTATTAATCTTTCTGTGTGCTAATATTTGTTGCAAG	UGCUAAU	UGCUAAU	14	49	UAUUAAU	30	1	NA	No	YES	No	NA	No	SPAC3G9.10c_intron2	UAUUAAU;GUGCUAA;UGCUAAU	28;13;12	1;1;17	YES	No
I	2694837	2694902	66	1	SPAC644.12	SPAC644.12.1:exon:2-SPAC644.12.1:exon:3	int_570	14	14	0	0	0	11	2	1	A;A	GUUACUAACUU;UGUUACUAACU	16;17	9;5	Awan_Short	0	0	0.916061	0.622914	1	1	-16.6096	1.34538	GTAAAGACTATGATTTTAACCTTCTACCACGCGCAATGTTTTTGTTACTAACTTATTGGTAAACAG	UACUAAC	UACUAAC	16	9		NA	NA	NA	No	YES	No	NA	No	SPAC644.12_intron2	UACUAAC	14	3	YES	No
I	3441362	3441486	125	1	SPAC3A11.14c	SPAC3A11.14c.1:exon:3-SPAC3A11.14c.1:exon:4	int_711	5	4	1	0	0	4	1	2	A	UGUACUAACCA	12	5	Awan_Short;Awan_Long	18	21	3.26768	3.28648	2.71429	7.33333	4.49359	4.44405	GTGAGTATTAGAATGAAAAGTTCTTTACGAAACACGTTCTTTAACTGTCAAAGTGGCTACTTATTTGCTTTGCAGCAGTGTGTAAAGTCTATATTGAAAGCATTTTTGTACTAACCAGACATTAG	UACUAAC	UACUAAC	12	5		NA	NA	NA	No	YES	No	NA	No	SPAC3A11.14c_intron3	UACUAAC	10	3	YES	No
III	422887	423309	423	-1	SPCC306.08c	SPCC306.08c.1:five_prime_UTR:2-SPCC306.08c.1:exon:1	int_4941	1	1	0	0	0	1	1	1	A	AGUCUUGACAU	275	1	Awan_Short	40	28	8.87105	8.84101	41	29	6.04649	6.21691	GTAAGTAAAAGTGAGTATGCAAAACGATCAAGTTACATCCCAATTTGCCAGAAAAAATATTTTAAAAATGAATAAACCGACGTAAATACTACTCTTGAGACCTTTTTATACACACGAAAGTCGATATTTTTTTTGGAAAAAAGTCTTGACATAAACAGCTACGCCAGTCTTTATGTACCGTACCCGTTTCTCCGAGGTCACTAGGTACAGGACTTTCTGAAGGAATATTTTATAAGAGATGCTATACGCATATGCTTTTTTATGCTTAGAATCGGCATGAGGAGTTTGTTTGTAACCAGGATGTCGAGTAGCTTTGCTTTGCTAGTCAGTCCGTATAAACGTTATGGTGTAGGATGCGGCTACTCATGTTTGCATATATATACATATTTTATTTTCAAC…	UUCUAAC	UCUUGAC	275	1		NA	NA	NA	No	No	No	NA	No	SPCC306.08c_intron1	UCUUGAC	273	1	YES	No
II	2004066	2004214	149	1	SPBP23A10.05	SPBP23A10.05.1:exon:2-SPBP23A10.05.1:exon:3	int_2782	7	7	0	0	0	5	1	1	A	UUUACUAAUAC	14	7	Awan_Short	63	45	5.73375	6.50341	32	23	5.36543	5.15559	GTAAGTTGCTCACAAGCACTGCGGTATAAGGGATCATTAAGCAATTGTCTAGGAACTTGCATATGTGTATCCCCGTTTATTTTAAAATAAATGCTTCAAATAAATTATTATTTTACTGAATTTATAAGTTTACTAATACAATACGATAG	UACUAAU	UACUAAU	14	7		NA	NA	NA	No	YES	No	NA	No	SPBP23A10.05_intron2	UACUAAU	12	2	YES	No
II	1186641	1186737	97	-1	SPBC4.02c	SPBC4.02c.1:exon:4-SPBC4.02c.1:exon:3	int_3622	8	8	0	0	0	6	2	1	A;A	GUUAUUAAUGU;UGAAAAGAUGG	10;48	7;1	Awan_Short	8	1	9.54458	9.82227	0.375	0.0740741	4.2785	4.22673	GTAAGTATTGGAATTCGGGTTTCGTACTGTCGACTTTGGCATTGAAAAGATGGAATCAGAACATATATCATGTGTCTATAGTTATTAATGTGTATAG	UAUUAAU	UAUUAAU	10	7	AAAAGAU	48	1	NA	No	YES	No	YES	No	SPBC4.02c_intron3	UAUUAAU	8	5	YES	No
II	1094517	1094607	91	-1	SPBC1734.16c	SPBC1734.16c.1:exon:2-SPBC1734.16c.1:exon:1	int_3600	5	5	0	0	0	4	1	1	A	AAUGCUAAUAU	9	5	Awan_Short	61	61	3.32712	3.80336	10.3333	12.4	5.55525	5.39741	GTAAGTTTTTACATGCTTCTTCTGCGAAACATCATTTCGAGAAACAATCTTGGTTTATGAGGTTCGTTTTTAACAAATGCTAATATTATAG	UGCUAAU	UGCUAAU	9	5		NA	NA	NA	No	YES	No	NA	No	NA	NA	0	0	No	No
II	1162666	1162819	154	-1	SPBC409.12c	SPBC409.12c.1:exon:3-SPBC409.12c.1:exon:2	int_3618	1	1	0	0	0	1	1	1	A	UUUCCUAACUG	11	1	Awan_Short	7	4	4.53496	4.5298	1.33333	5	1.71598	2.35572	GTAACGAATATCAGCATTGAGGCAATAAGCAGTTCCACTACTGCATACACGACTCATTTAGTTGTTGAATCTAGTTAAGGTTTTTTATAAAATCAACTTTTGAGAAGCATCTGCCTCTATAGCTCCCTTTTTTCTATTTCCTAACTGAATTTAG	UCCUAAC	UCCUAAC	11	1		NA	NA	NA	No	YES	No	NA	No	NA	NA	0	0	No	No
II	1466036	1466137	102	-1	SPBC32H8.08c	SPBC32H8.08c.1:exon:3-SPBC32H8.08c.1:exon:2	int_3676	1	1	0	0	0	1	1	1	A	AUUACUAACUU	11	1	Awan_Short	0	0	2.79052	3.57984	1	1	-16.6096	-16.6096	GTATGTTTTTACAGTTTATTCAAAAAAAAAAAAGCATTGTGTTCTTCGAAGTGCAATCTTCTTCATACTTTTTTCCTATCTCTGATTACTAACTTATTTTAG	UACUAAC	UACUAAC	11	1		NA	NA	NA	No	YES	No	NA	No	NA	NA	0	0	No	No
I	2690273	2690407	135	1	SPAC644.09	SPAC644.09.1:exon:2-SPAC644.09.1:exon:3	int_566	24	12	12	0	0	14	2	2	A;A	AAGGCUAACAG;GUUAGAUAAUA	12;52	23;1	Awan_Short;Awan_Long	72	64	4.7744	4.8193	36.5	32.5	6.18969	5.88969	GTAAGTGCTAGAATGTATTATGTGTTTTCGGTAATCTATTTTTTGATGCCTACCATCTTTAAAAACACTTTTTTAAGTTAGATAATAAGTGGTTCTCATTGTTTATTTCCATTCACAAGGCTAACAGTGCCATAG	GGCUAAC	GGCUAAC	12	23	UAGAUAA	52	1	NA	No	YES	No	NA	No	SPAC644.09_intron2	GGCUAAC	10	6	YES	No
I	1139334	1139447	114	1	SPAC56F8.08	SPAC56F8.08.1:exon:1-SPAC56F8.08.1:exon:2	int_259	12	12	0	0	0	9	1	1	A	UUUACUAACAU	12	12	Awan_Short	42	22	5.56496	5.88969	21.5	5.75	6.16249	5.78278	GTACGTTTAATTTCGCATAATAGCGCCCGTATAAACTGCTGAGTCCAATAATTTAGTTTTAATGGACACAATAAATAAAGGGCTTTCGAAGGTGATTTACTAACATTTTTGTAG	UACUAAC	UACUAAC	12	12		NA	NA	NA	No	YES	No	NA	No	NA	NA	0	0	No	No
II	583961	584041	81	-1	SPBC354.14c	SPBC354.14c.1:exon:6-SPBC354.14c.1:exon:5	int_3487	31	31	0	0	0	23	2	1	A;A	UUAGCUAACUC;UUUAGCUAACU	11;12	27;4	Awan_Short	21	12	2.35757	1.64938	5.5	6.5	3.55732	3.68867	GTAAGTTTTTTTTAGAGAATTTATTGACGATTTTGTCTACACACGATATACGGAATATATTCTTTAGCTAACTCATTATAG	AGCUAAC	AGCUAAC	11	27		NA	NA	NA	No	YES	No	NA	No	SPBC354.14c_intron5	AGCUAAC	9	6	YES	No
II	1489345	1489529	185	-1	SPBC11B10.02c	SPBC11B10.02c.1:exon:3-SPBC11B10.02c.1:exon:2	int_3679	30	9	21	0	0	12	2	2	A;A	UUUGCUAAUCU;UUUUGCUAAUC	10;11	29;1	Awan_Short;Awan_Long	74	51	8.53846	8.51854	6.25	13	7.99998	7.75476	GTATGTTTTATCTTTATATTTGGGTAATAATTGATATGAGGGCTACTTCTAGAAAGATATTTTATTAGCTGCTTGGAAAGCAATGAAGTACTCCCTGTTTACTGTTGTTGTTGGAGCTGGCGATTTCAGGCCTTTGTTGTTTTTTACCCTTTTCTCGCCTATATATTTTTTGCTAATCTTAATAG	UGCUAAU	UGCUAAU	10	29		NA	NA	NA	No	YES	No	NA	No	NA	NA	0	0	No	No
III	2269489	2269600	112	-1	SPCC1840.06	SPCC1840.06.1:exon:2-SPCC1840.06.1:exon:1	int_5332	19	19	0	0	0	10	2	1	A;A	GUAAUUAACUC;GGUAAUUAACU	19;20	17;2	Awan_Short	40	22	5.70768	5.90434	41	23	7.4407	7.42332	GTATGTACTGTAAAAGGTGATTTTTAATTGCTACCATTTTGACTGATATCTTCATTGTCATCCAAAAGTCTGAATTTTTTGTCTTGGTAATTAACTCTTTTCTCTTATTTAG	GACUGAU	AAUUAAC	19	17		NA	NA	NA	No	No	No	NA	No	SPCC1840.06_intron1	AAUUAAC	17	8	YES	No
III	1535583	1535665	83	1	SPCC584.04	SPCC584.04.1:exon:1-SPCC584.04.1:exon:2	int_4682	30	30	0	0	0	22	2	1	A;A	AUUAUUAACUU;AAUUAUUAACU	12;13	28;2	Awan_Short	481	451	6.61516	6.8545	24.1	64.5714	8.37452	8.56852	GTACGTTTTTTAATTAGAACACCATCCATATGTCTTGAGATGATTGCTTGTTTTAAGTAAAAAAATTATTAACTTCTTGCTAG	UAUUAAC	UAUUAAC	12	28		NA	NA	NA	No	YES	No	NA	No	SPCC584.04_intron1	UAUUAAC	10	3	YES	No
III	262885	263092	208	1	SPCC794.07	SPCC794.07.1:exon:1-SPCC794.07.1:exon:2	int_4424	24	24	0	0	0	13	1	1	A	AAAUCUAAUCA	134	24	Awan_Short	0	0	5.38929	5.79975	0.2	0.142857	-16.6096	-16.6096	GTAAGTAAGATAGATCAGTATATTGATGCTTCTGGTTCATCGATTAATCGTAATGAATTTTAAACGAAAATCTAATCAGTGTGCAGAAAAGTTCAGGTTAAAAAGTCTGCTCTTTATCCTGTTATGGCTAAGCTAGCTCGCACATACGCTACCAAAAGTAAGTGATTGCTTTTTTGGCTGAGAAATGGCTTTCTAACAGTTACCATAG	UUCUAAC	AUCUAAU	134	24		NA	NA	NA	No	No	No	NA	No	SPCC794.07_intron1	AUCUAAU	10	3	YES	No
II	2363004	2363085	82	-1	SPBC19G7.07c	SPBC19G7.07c.1:exon:2-SPBC19G7.07c.1:exon:1	int_3849	4	4	0	0	0	4	1	1	A	UUUACUAACGU	12	4	Awan_Short	26	12	3.5415	3.47967	27	6.5	5.52068	4.99937	GTAAAATATTTATTAAATAAAGGGTTTGAGTACAAAATAACACTGCTAAAAGATACTGTCTTGTTTACTAACGTTAGCATAG	UACUAAC	UACUAAC	12	4		NA	NA	NA	No	YES	No	No	No	SPBC19G7.07c_intron1	UACUAAC	10	1	YES	No
I	1632210	1632361	152	1	SPAP27G11.12	SPAP27G11.12.1:exon:2-SPAP27G11.12.1:exon:3	int_353	4	1	3	0	0	4	2	2	A;A	UGUACUAACCA;AAUUUCAAGUG	10;19	3;1	Awan_Short;Awan_Long	53	35	5.92197	6.11286	10.8	7.2	5.78211	5.59859	GTAGGTAATATTTTTCTTTTGGTTGGTTTCATAATTCAGTGAATGCCAGAGAATACGAAGTTCAATTCTTAGGATTCTCTGCTAATGAATGTGAATTCAATTTGAATATAATCATAAATAATTGAAAATTTCAAGTGTACTAACCAATTCAG	UACUAAC	UACUAAC	10	3	UUUCAAG	19	1	NA	No	YES	No	NA	No	NA	NA	0	0	No	No
I	1808539	1808629	91	-1	SPAC1002.07c	SPAC1002.07c.1:exon:5-SPAC1002.07c.1:exon:4	int_1562	9	9	0	0	0	7	1	1	A	GAUUUUAACCA	17	9	Awan_Short	60	42	4.59561	4.44491	61	43	6.08058	5.77248	GTATGTTCTTATCATATTGTCCTTCATAACCTTTTTATTGAAGGATTAACTTTTGATTTCATAGCAAGATTTTAACCATTCAATTTCTTAG	UUUUAAC	UUUUAAC	17	9		NA	NA	NA	No	YES	No	NA	No	SPAC1002.07c_intron4	UUUUAAC	15	4	YES	No
II	3997676	3997818	143	1	SPBC3B9.05	SPBC3B9.05.1:exon:1-SPBC3B9.05.1:exon:2	int_3280	56	28	28	0	0	30	3	2	A;A;A	UUGACUAACAG;GUUGACUAACA;UAUGUUGACUA	11;12;15	46;7;3	Awan_Short;Awan_Long	54	39	4.9705	4.96686	18.3333	13.3333	4.75881	4.6673	GTAAGTTATTGGATTACAATCCTAGTTTTTCAGCTTAAATTCTATCATTGCTAAGAAAAGGACCTTGTTAAAATGAATTTTCCAAAGCTATCTTTTTCAGGCGCTATTATTAAGTTTATTGTATGTTGACTAACAGTTTATAG	GACUAAC	GACUAAC	11	46	UGUUGAC	15	3	NA	No	YES	No	NA	No	SPBC3B9.05_intron1	UGACUAA;GACUAAC	10;9	1;11	YES	No
II	1421169	1421229	61	1	SPBC691.01	SPBC691.01.1:exon:4-SPBC691.01.1:exon:5	int_2658	2	2	0	0	0	2	2	1	A;A	AGCACUAAUUU;AAGCACUAAUU	11;12	1;1	Awan_Short	2	3	2.44475	2.54392	0.75	0.5	4.21015	4.41707	GTACGTAAACCGAAAATCCTCTGATCTGCATATCTTTGAATAAAGCACTAATTTTGATCAG	CACUAAU	CACUAAU	11	1		NA	NA	NA	No	YES	No	NA	No	NA	NA	0	0	No	No
III	581123	581238	116	1	SPCC1672.09	SPCC1672.09.1:exon:2-SPCC1672.09.1:exon:3	int_4485	6	6	0	0	0	5	1	1	A	UUUACUAAUUG	12	6	Awan_Short	44	29	4.40015	4.56421	22.5	15	5.54786	5.53861	GTAAGTATTTTGCTGCGTTCAATTTATCATATTTTAAATAATTAGTTACTGGTAAAGTTAATATGGTTTTCGTTCGAGTTTTCTTTTTTAAAAATTATTTACTAATTGTGCTTAAG	UACUAAU	UACUAAU	12	6		NA	NA	NA	No	YES	No	NA	No	SPCC1672.09_intron2	UACUAAU	10	3	YES	No
II	616164	616315	152	-1	SPBC839.08c	SPBC839.08c.1:exon:2-SPBC839.08c.1:exon:1	int_3497	61	10	51	0	0	35	2	2	A;A	UUUACUAACCA;UUUUACUAACC	16;17	54;7	Awan_Short;Awan_Long	50	17	7.38495	7.50948	51	18	5.46397	4.65858	GTAAGTAAACATTTGTAATAGTGAAATTAGTGTATAGAGCTTAATGAAAAAAATGTCATATTTTCGTTTTGGATTTAGAAAAAAAAACAAGAAATAGTACAACTTTTTTCTTGTCCTTCTTTTTCTTATTTTACTAACCAATATGCTTATAG	UACUAAC	UACUAAC	16	54		NA	NA	NA	No	YES	No	NA	No	SPBC839.08c_intron1	UACUAAC	14	3	YES	No
I	3102150	3102282	133	-1	SPAC589.05c	SPAC589.05c.1:exon:3-SPAC589.05c.1:exon:2	int_1842	16	15	1	0	0	13	2	2	A;A	UGUAUUAACGU;AUGUAUUAACG	15;16	14;2	Awan_Short;Awan_Long	7	7	3.77963	3.7413	1.14286	1.33333	3.40927	3.37247	GTATGTGTGGACGCTTGAATGTTTTCGTAGATTAAATAAAGATGAGCTGCTGAACATATACACTTTATATTTTTTTAATACTTCATTTCAACAAGTTTACCCTGTTCATAATGTATTAACGTCAAATCTTTAG	UAUUAAC	UAUUAAC	15	14		NA	NA	NA	No	YES	No	NA	No	SPAC589.05c_intron2	UAUUAAC	13	3	YES	No
II	4384705	4384815	111	-1	SPBC1289.02c	SPBC1289.02c.1:exon:3-SPBC1289.02c.1:exon:2	int_4345	10	10	0	0	0	8	1	1	A	AGAGCUAACAG	11	10	Awan_Short	7	5	4.46371	4.62777	0.25	0.146341	5.52233	5.12047	GTATGTTATGTAATGAATACTCATAAAAAATTTCTCTTTTATTTATTGTTGCATACCAACTTTTTTCTTTCTCGGTTTTATCTTTTAATTTATAGAGCTAACAGGTTTTAG	AGCUAAC	AGCUAAC	11	10		NA	NA	NA	No	YES	No	NA	No	SPBC1289.02c_intron2	AGCUAAC	9	7	YES	No
I	1296256	1296413	158	-1	SPAC1565.04c	SPAC1565.04c.1:exon:2-SPAC1565.04c.1:exon:1	int_1413	35	10	25	0	0	26	3	2	A;A;A	UUUACUAAGAA;AUUUACUAAGA;GCAAUUUACUA	11;12;15	23;8;4	Awan_Short;Awan_Long	4	4	3.95435	4.19641	5	5	2.17255	2.04932	GTATGTATGCATAACAGAAGTTTAATTCAAAGAATTATTTGCTCGCCTCTCATTAATCCTTATTGAATGCTCTTTCTTTTATAGTCAATGGGGGATTGGGAACAATGAGTTTCTCCAAAGTTGGTTCAATTTCATGGCAATTTACTAAGAATTTCTAG	CAUUAAU	UACUAAG	11	23	AAUUUAC	15	4	NA	No	No	YES	NA	No	SPAC1565.04c_intron1	UACUAAG	9	3	YES	No
III	2197854	2198056	203	-1	SPCC830.09c	SPCC830.09c.1:exon:1-SPCC830.09c.1:three_prime_UTR:1	int_5311	98	16	82	0	0	30	3	2	A;A;A	UUUACUAAUUU;CUUUACUAAUU;GAAAUAUAUAC	12;13;155	92;5;1	Awan_Short;Awan_Long	11	8	10.7861	10.8882	0.375	0.6	4.09617	4.08946	GTAAGTTTCATCATTTCACAAATGGAGATTTCAGAGGATGCGAAATATATACCCAAATTGTATAGCAAGGATAACGGGGTAATCGTTTTGGTTGCCTTCTTGCAGTGATAAAGCATTTTGTCATAGTTACACTGATGAAATTCTTCATTTGCTTAAAACTTTTTGGTCTTAAGTTTGAAAATTCTTTACTAATTTTGAAATAG	UACUAAU	UACUAAU	12	92	AAUAUAU	155	1	NA	No	YES	No	NA	No	SPCC830.09c_intron1	UACUAAU	10	1	YES	No
II	2690929	2691196	268	1	SPBC4F6.04	SPBC4F6.04.1:exon:1-SPBC4F6.04.1:exon:2	int_2939	4	2	2	0	0	3	3	2	A;A;A	CGUACUAAUUG;UCUAAAGAUAA;AAUAGUGACCA	10;145;180	2;1;1	Awan_Long;Awan_Short	3908	4191	10.775	10.6114	12.5691	19.1416	9.44394	9.73391	GTAAGTTTACTTGTTTGCATCGTTTGCTATGCTTCGCTGTAGCTTTCCAAGAATTGTTAAGAATGGCGTGAAACCAGGCCGAATAGTGACCATTTTAAATGATTAGGGCAAGAGATTCTAAAGATAAAGTGAATAATTAGAACCTATTCCAATTGATTACTTGAAAATTCATTATAGGCTTGCAATTCTTATGCATACCGAAGTTTATAGAATATTAACGTGATTATAAAAAAATAAGTTAAATTTTTTTTCGTACTAATTGTTTTAG	UACUAAU	UACUAAU	10	2	UAAAGAU	145	1	NA	No	YES	No	NA	No	NA	NA	0	0	No	No
I	749996	750112	117	1	SPAC22G7.08	SPAC22G7.08.1:exon:1-SPAC22G7.08.1:exon:2	int_163	2	2	0	0	0	2	1	1	A	UACGCUAACUA	14	2	Awan_Short	1	7	0.090096	1.79694	2	8	3.32268	3.08538	GTATGTTTTCTGCCTTTAATTTTTTTAGTTATCTTTTTTTCTTTAAAAAAAAGAATAGAAAAAAATCCTTATTTTTCTAAATATTCAAATATGGTGTACGCTAACTAATGATATTAG	AACUAAU	CGCUAAC	14	2		NA	NA	NA	No	No	No	No	No	SPAC22G7.08_intron1	CGCUAAC	12	1	YES	No
III	1796683	1796757	75	-1	SPCC1442.17c	SPCC1442.17c.1:five_prime_UTR:2-SPCC1442.17c.1:exon:3	int_5211	8	8	0	0	0	5	1	1	A	UAUGCUAAUCA	11	8	Awan_Short	0	0	0.146679	-0.561499	1	1	-16.6096	-16.6096	GTAAGTTTCTGTTATTTATTTTCATTGAAAATAAAAAAACGCGCTAAAAAAAGTTCGTATGCTAATCAATTCTAG	UGCUAAU	UGCUAAU	11	8		NA	NA	NA	No	YES	No	NA	No	SPCC1442.17c_intron3	UGCUAAU	9	1	YES	No
I	4779668	4780022	355	-1	SPAC11H11.03c	SPAC11H11.03c.1:exon:3-SPAC11H11.03c.1:exon:2	int_2221	38	16	22	0	0	16	2	2	A;A	GUAUCUAAUUC;GGUAUCUAAUU	228;229	36;2	Awan_Short;Awan_Long	3	3	6.12781	5.86805	1.33333	4	3.48619	3.31857	GTAATCTCAAATTCTCATTAAAAGCTGTGATTGTTAGTTCAAACCCTATAAACTTTCAATAATAGAAAAACAAACCCATCATGAGATTTTTCTTTCTTTCTTTTCCACTCTTTTTGTTTGGTATCTAATTCCGGTAGTTATCGGTCAGACAATACGCCAAACAATAGTAGTTATGACAATGAACTATTCTTTGTACAAAGTGAAGAGCTCTGAAACAGCTGAATAAAGCCATGTGATTTAAGAGAAAAATGGGTTGGCTTCTTTATAGAACTTAAAACACTGGGTTTCTTCAAACCCATATTGGCTTCGAGAAAACAAAATAGAAGTGTTTTATGACTGTGCTAATTATTGATAG	UGCUAAU	AUCUAAU	228	36		NA	NA	NA	No	No	No	NA	No	SPAC11H11.03c_intron2	AUCUAAU	226	7	YES	No
I	1606804	1606974	171	-1	SPAC23H4.02	SPAC23H4.02.1:exon:2-SPAC23H4.02.1:exon:1	int_1500	31	17	14	0	0	20	4	2	A;A;A;A	AUGGCUAACAG;ACUACUUAUAG;GAUGGCUAACA;UUGUACGAUGG	9;99;10;16	24;5;1;1	Awan_Short;Awan_Long	19	12	6.02909	6.14426	20	3.25	4.69005	4.42199	GTAAGTACATGAGGTGAAATTTAGTTGACTTTGTCTTGTAGGGGCTTGTTAATAAGATAGAGTAGACTACTTATAGACAGTAGAGATAGACTACTTAGGTGTCATGGTTATCTTGCGCATCGATCGTCTTTGATTTTGTTTTTGGCAATTGTACGATGGCTAACAGTGTAG	GGCUAAC	GGCUAAC	9	24	UACUUAU	99	5	NA	No	YES	No	NA	No	SPAC23H4.02_intron1	GGCUAAC	7	2	YES	No
III	1331792	1331985	194	1	SPCC132.03	SPCC132.03.1:exon:1-SPCC132.03.1:exon:2	int_4645	23	19	4	0	0	20	2	2	A;A	UUUACUAAUCA;AUUUACUAAUC	18;19	19;4	Awan_Short;Awan_Long	34	23	6.13752	5.84875	0.744681	0.631579	6.13198	5.88431	GTATGACAAAGATGCTGAAAAGAATTAAGGAAGGAGAAGCAAACTTGGCTGCATCCCTCCTTTTTTGCACAATTAAAAGTGGCGAATTTTGAGGTGAAAACATGTTAAATCTCTCAATTCGATTTACAAAGATCCCTTCGTTATGCAAAAACATTACAAAATAACCCAATTTACTAATCAACTATTTCTGTTAG	UACUAAU	UACUAAU	18	19		NA	NA	NA	No	YES	No	NA	No	SPCC132.03_intron2	UACUAAU	16	4	YES	No
I	3103566	3103707	142	-1	SPAC589.06c	SPAC589.06c.1:exon:2-SPAC589.06c.1:exon:1	int_1844	13	1	12	0	0	10	3	2	A;A;A	UUUUCUGACAA;UUCUGACAAAA;ACUAUAGAAGA	17;15;47	9;3;1	Awan_Short;Awan_Long	143	80	7.6913	8.02535	48	81	5.44692	4.97598	GTAAGTTTTATTATATTTAAACTTTAGTGTTCTGAGAATATTTGTCAAATGCGAGGTATTCTTTTGCATGGGCTTTATTAGATTTCGCACTATAGAAGAAATATAAAGTATGTTCAGCTTTTCTGACAAAATCGAAATTTAG	UUCUGAC	UUCUGAC	17	9	CUGACAA	15	3	NA	YES	YES	No	NA	No	NA	NA	0	0	No	No
II	4386685	4386818	134	-1	SPBC1289.03c	SPBC1289.03c.1:exon:3-SPBC1289.03c.1:exon:2	int_4347	29	24	5	0	0	17	2	2	A;A	AUUACUAAUCG;CAUUACUAAUC	11;12	28;1	Awan_Short;Awan_Long	317	261	6.99939	7.17486	39.75	87.3333	8.90524	8.95672	GTAAGTGATATTTAAGCAAAAAAAAGCTTTAAATGTTTTTTTTGATACTCATAGACCGCTAGATTTAATGGTTATAAGTATATTGACATTAGCTTTTTTTGACTACTTTAATGAACATTACTAATCGAATGCAG	UACUAAU	UACUAAU	11	28		NA	NA	NA	No	YES	No	NA	No	SPBC1289.03c_intron2	UACUAAU	9	11	YES	No
II	2452182	2452318	137	1	SPBC12C2.10c	SPBC12C2.10c.1:exon:1-SPBC12C2.10c.1:exon:2	int_2894	39	8	31	0	0	18	2	2	A;A	AAUACUAAUUA;AAAUACUAAUU	13;14	36;3	Awan_Short;Awan_Long	5	4	4.65249	5.22748	6	5	4.19013	3.98718	GTATGTAATTTGCTCTAACTTGTTATGGTTTTGACATGTAAAACAATATTGATTTTATTGTAAACAGTAGGATTTGTTTTACTTGAAACTACTAATTACAAAATATATTTGTATAAAAATACTAATTATTTGATTAG	UACUAAU	UACUAAU	13	36		NA	NA	NA	No	YES	No	NA	No	SPBC12C2.10c_intron1	UACUAAU	11	4	YES	No
II	383875	383939	65	-1	SPBC106.05c	SPBC106.05c.1:exon:2-SPBC106.05c.1:exon:1	int_3427	5	5	0	0	0	5	1	1	A	AUCUCUAACGA	8	5	Awan_Short	94	54	4.87668	4.45229	31.6667	55	7.81031	7.88489	GTATCCTCTAATGAATTAGTTTCACGAAATATCCATGTGTATTTTTAACCATCTCTAACGAATAG	CUCUAAC	CUCUAAC	8	5		NA	NA	NA	No	YES	No	NA	No	SPBC106.05c_intron1	CUCUAAC	6	2	YES	No
I	3185578	3185700	123	1	SPAC1486.01	SPAC1486.01.1:exon:1-SPAC1486.01.1:exon:2	int_666	9	6	3	0	0	7	3	2	A;A;A	AUUACUAACUA;GAUUACUAACU;GAUGAUUACUA	13;14;17	4;3;2	Awan_Short;Awan_Long	136	101	5.80801	5.57027	13.7	17	7.90474	7.70904	GTATGCAATAAATAGTTGTAAAAGCAATTGCTCATGTTGATGGGTTCTGAAGCAATCATAAGTTTTGGATGTTTCCCACTGTCTAGTTAATTTGTTAATGATGATTACTAACTATAGCTTTAG	UACUAAC	UACUAAC	13	4	UGAUUAC	17	2	NA	No	YES	No	NA	No	SPAC1486.01_intron1	UACUAAC	11	1	YES	No
I	821119	821376	258	-1	SPAC2G11.07c	SPAC2G11.07c.1:exon:2-SPAC2G11.07c.1:exon:1	int_1303	6	2	4	0	0	5	3	2	A;A;A	UUUGCUAACUA;CUAGUUAAUGC;UCUAGUUAAUG	13;133;134	4;1;1	Awan_Long;Awan_Short	320	281	5.36426	5.65607	24.6923	16.5882	8.69741	8.83506	GTAAGTTTGTTGTTAACAATGATAAAGTTGTTTTCATTGATATCATAACCATTTTAAAGTCGCCAAAAAATTGATGAATTTTGTGTTTGAAATTTTTATAGATTTTTTGTTCTTTTGTCTAGTTAATGCTTAGAAAAATTGTTACCAAGATAATAGAAATGTTTACCTCTTGATGTTGAAAAGTTGTTACATTTAGTTTGGTTTCAGAAAAAAAATTTGTCATTTCACTACATTGCATTTTGCTAACTATTTTGACAG	UGCUAAC	UGCUAAC	13	4	AGUUAAU	133	1	NA	No	YES	No	No	No	NA	NA	0	0	No	No
II	543553	543667	115	1	SPBC354.01	SPBC354.01.1:exon:2-SPBC354.01.1:exon:3	int_2447	11	11	0	0	0	11	2	1	A;A	UAAACUAACCU;UAAAUUAAACU	14;19	10;1	Awan_Short	7	3	3.11496	3.28124	4	4	3.07432	3.55878	GTAAGTTTTTTTAATTCATTTCTAACTGGAATGCCTTTTATTTTATAGCAAATATTACAATGTTGTTCCAACTTATAAAGAATCAACTCTAAATTAAACTAACCTAGTCCTTTAG	AACUAAC	AACUAAC	14	10	AAUUAAA	19	1	NA	No	YES	No	NA	No	NA	NA	0	0	No	No
III	1805910	1806075	166	-1	SPCC285.06c	SPCC285.06c.1:exon:3-SPCC285.06c.1:exon:2	int_5217	25	15	10	0	0	9	1	2	A	UAUAUUAAUUU	10	25	Awan_Short;Awan_Long	0	0	0.807808	1.46219	1	1	-2.41885	-1.12709	GTAAGAATTGTAAATAATAAGAAAGGAATTACTCAATTGAAAGTTGAAACTTGCCATCTTGTCAAATTGCATGCTTTGGTCATTGTTTACAGTCGGCCATGCAATGCACACATTTTAAAACATGTTCTTTCTTTACTAAAGTCTTTCATTATATTAATTTAAACAG	UAUUAAU	UAUUAAU	10	25		NA	NA	NA	No	YES	No	NA	No	NA	NA	0	0	No	No
I	3221621	3221794	174	-1	SPAC6G10.04c	SPAC6G10.04c.1:exon:4-SPAC6G10.04c.1:exon:3	int_1866	14	6	8	0	0	11	6	2	A;A;A;A;A;A	AAUAUUAACGC;CGGUGGGAAUA;UAAUGGAAUAU;GAGUAUUACUA;ACUAGGCAUAA;GGUGGGAAUAC	9;85;15;64;57;84	4;4;2;2;1;1	Awan_Short;Awan_Long	112	124	9.28569	9.16833	113	125	6.15648	6.50624	GTAAGGCATTTAATGGATGTAAGACAGTCATGCAAAAACCGTAATCTCTATGTGTGTTTGCTTTGGTTTTTGAAATTGCTATCGGTGGGAATACTTTTTTTGAGAGTATTACTAGGCATAATGATTTTGTATATTACAATTTACGTTTGTTATAATGGAATATTAACGCAACAG	UAUUAAC	UAUUAAC	9	4	GUAUUAC	64	2	NA	No	YES	No	NA	No	NA	NA	0	0	No	No
II	943220	943360	141	1	SPBC646.11	SPBC646.11.1:exon:3-SPBC646.11.1:exon:4	int_2523	35	23	12	0	0	21	3	2	A;A;A	UGUACUAACUU;GUGUACUAACU;AUUUUGGAAUU	13;14;75	29;5;1	Awan_Short;Awan_Long	77	57	7.71369	7.12394	5.57143	5.27273	6.08973	5.81705	GTAAGTGATTAAGAACACATTAACTGCAAATGCTTTTTTCTTTCTTTCCTTTTTTGATAATTTTGGAATTTTTTTGACTACTTTAGGTCTCATGTTGCTTTTAATAATGAGTATTGAGTTGTGTACTAACTTTATTGGTAG	UACUAAC	UACUAAC	13	29	UUUGGAA	75	1	NA	No	YES	No	NA	No	SPBC646.11_intron3	UACUAAC	11	9	YES	No
II	3030914	3031054	141	-1	SPBC15D4.11c	SPBC15D4.11c.1:exon:2-SPBC15D4.11c.1:exon:1	int_4007	6	5	1	0	0	5	2	2	A;A	AGUACUAACGU;UUUCAGCAGAG	10;45	5;1	Awan_Short;Awan_Long	4	7	2.62825	2.77568	2.5	8	2.56813	2.85995	GTAAGCTATTTTTCCTCAATTGTTTGTTGAATTCAACGATGTGATTTCATGTCTATGCGTTGGCTAATATACAACGTTTAAGATTATGCTTTCAGCAGAGCCTTTAAATTTCTTTCGATATAATAGTACTAACGTAGCTAG	UACUAAC	UACUAAC	10	5	UCAGCAG	45	1	NA	No	YES	No	NA	No	SPBC15D4.11c_intron1	UACUAAC	8	2	YES	No
I	5120334	5120440	107	1	SPAC29A4.14c	SPAC29A4.14c.1:exon:2-SPAC29A4.14c.1:exon:3	int_1067	12	12	0	0	0	10	2	1	A;A	AGUGCUAACAC;UAGUGCUAACA	14;15	9;3	Awan_Short	68	53	5.71083	5.46499	6.27273	4.5	5.62935	5.53912	GTATGTGTTGATAGTGCGTTGGCGGTAAATGTTTGAATCCGATTGGCGTTAATATATATGTGTTTTATCTTTCATCTTAATTTTTTAGTGCTAACACTTCGAACTAG	UGCUAAC	UGCUAAC	14	9		NA	NA	NA	No	YES	No	NA	No	NA	NA	0	0	No	No
II	756974	757056	83	1	SPBC577.04	SPBC577.04.1:exon:1-SPBC577.04.1:exon:2	int_2487	4	4	0	0	0	4	2	1	A;A	CUUUCUAACCA;UCUUUCUAACC	13;14	3;1	Awan_Short	100	50	4.83334	4.42154	101	51	5.37548	5.0445	GTACGTGAAAGTTCCTTACCTTTTTTTTTTTTTTTTTCAGATTTCAAAAGTCTTTGTTCATTTCTTTCTAACCATTTTAATAG	UUCUAAC	UUCUAAC	13	3		NA	NA	NA	No	YES	No	NA	No	SPBC577.04_intron1	UUCUAAC	11	2	YES	No
III	696084	696156	73	1	SPCC16C4.15	SPCC16C4.15.1:exon:1-SPCC16C4.15.1:exon:2	int_4521	2	2	0	0	0	2	2	1	A;A	UUUACUAAUUC;UUUUACUAAUU	12;13	1;1	Awan_Short	29	6	0.185673	0.477484	30	3.5	5.61649	5.13597	GTATGTAATATTAACACGAGGGTTACTTTTTATTTATCAAGCCTTAATTCATTTTTTACTAATTCTTATCAAG	UACUAAU	UACUAAU	12	1		NA	NA	NA	No	YES	No	NA	No	SPCC16C4.15_intron1	UACUAAU	10	1	YES	No
III	320756	320963	208	1	SPCC736.05	SPCC736.05.1:exon:1-SPCC736.05.1:exon:2	int_4439	8	2	6	0	0	7	2	2	A;A	GAUUCUAAUAU;UGAUUCUAAUA	20;21	7;1	Awan_Short;Awan_Long	3	10	5.08444	5.13678	2	5.5	2.33507	2.78216	GTAAGTATTGTAGTTAATAAGGAAAGATGATAATTTCAAAAAAAAAAGAAGTGATTTTGTTTTACTACAAACAGTACGCTCCCCATCATTTCGCTGATGTGTACTTTTATATTAGTCGATTCACCTAAAATGTGTAAAACATACATACCTTATTTTTTACTATTTCACTTATGAACTGCATGATTCTAATATTTTTTTTCTTTTTCAG	UUCUAAU	UUCUAAU	20	7		NA	NA	NA	No	YES	No	NA	No	NA	NA	0	0	No	No
II	1248607	1248691	85	1	SPBC651.07	SPBC651.07.1:exon:1-SPBC651.07.1:exon:2	int_2595	17	17	0	0	0	14	2	1	A;A	UUUUCUAACUA;UUUUUCUAACU	13;14	14;3	Awan_Short	2	4	5.65259	5.54331	0.428571	1.66667	2.91605	4.20787	GTACGTTCCTCAATAAATGTTGCTGTACGGACATTGCCGTAACAAATTCAGTCAGTCAGATATATTTTTCTAACTAAAATTGAAG	UUCUAAC	UUCUAAC	13	14		NA	NA	NA	No	YES	No	NA	No	SPBC651.07_intron1	UUCUAAC	11	2	YES	No
I	3831684	3831774	91	-1	SPAC4H3.04c	SPAC4H3.04c.1:exon:3-SPAC4H3.04c.1:exon:2	int_2011	3	3	0	0	0	2	2	1	A;A	UUUGCUAACUG;AUUUGCUAACU	17;18	2;1	Awan_Short	1	0	2.67505	2.48143	1	1	1.86013	2.32882	GTATGTGAAAACAGTTTTGCTTAGTAGTTTTACTAAATTGCTACTGTCTATTTCTCAGCACAGATTATTTGCTAACTGGAAATTTATATAG	UGCUAAC	UGCUAAC	17	2		NA	NA	NA	No	YES	No	NA	No	NA	NA	0	0	No	No
I	4548475	4548567	93	-1	SPAC637.05c	SPAC637.05c.1:exon:4-SPAC637.05c.1:exon:3	int_2176	6	6	0	0	0	5	3	1	A;A;A	AAUGCUAAUUA;UAAUGCUAAUU;UUUAUUAAUGC	8;9;14	2;2;2	Awan_Short	92	38	3.83633	4.17253	18.6	7.8	7.43438	6.91523	GTAAGTGCCCTTGAGAAATTATATATCTTGGAAGATGTGTTTCTTAATGTCTTCTGTTTCTTATTTCGTTACTTTATTAATGCTAATTAATAG	UGCUAAU	UAUUAAU	14	2	UGCUAAU	8	2	NA	YES	No	No	No	No	SPAC637.05c_intron3	UGCUAAU;UAUUAAU	6;12	1;1	YES	No
I	367190	367292	103	1	SPAC630.11	SPAC630.11.1:exon:4-SPAC630.11.1:exon:5	int_38	15	15	0	0	0	9	2	1	A;A	UCUACUAACGU;CUCUACUAACG	13;14	14;1	Awan_Short	11	13	4.61972	4.81369	3	4.66667	4.35841	4.54331	GTATGGAAATATAATAATGTTGGTTGTTCTGGGGAAATTATTTCAACCATAATTGTTATTTTTCATTATTATTTGTAAGGAGCTCTACTAACGTTTACTAAAG	UACUAAC	UACUAAC	13	14		NA	NA	NA	No	YES	No	NA	No	SPAC630.11_intron4	UACUAAC	11	2	YES	No
I	4247615	4247704	90	-1	SPAC1F7.11c	SPAC1F7.11c.1:exon:2-SPAC1F7.11c.1:exon:1	int_2112	15	15	0	0	0	11	2	1	A;A	CCUUCUAACAG;GCCUUCUAACA	21;22	13;2	Awan_Short	10	0	6.46859	5.88969	11	0.5	5.6443	5.26954	GTAATTGATTGGCACAACGAAACATCAGAATTGATGCTTGTTGACTATTTTTTTTGATTTTGCCTTCTAACAGTAATTTCTTGTAAATAG	UUCUAAC	UUCUAAC	21	13		NA	NA	NA	No	YES	No	NA	No	SPAC1F7.11c_intron1	UUCUAAC	19	1	YES	No
III	1939292	1939360	69	1	SPCC74.05	SPCC74.05.1:exon:1-SPCC74.05.1:exon:2	int_4748	2	2	0	0	0	2	1	1	A	UUGGCUAACGA	13	2	Awan_Short	684	525	7.93939	7.55313	29.7826	87.6667	8.99417	8.8883	GTATGTTTGCGAGGTTTTAAACCTTTAGATTAATAAATTGTGGATTAACTTGGCTAACGAAACGTTCAG	GGCUAAC	GGCUAAC	13	2		NA	NA	NA	No	YES	No	NA	No	NA	NA	0	0	No	No
I	3727143	3727297	155	-1	SPAC15E1.05c	SPAC15E1.05c.1:exon:2-SPAC15E1.05c.1:exon:1	int_1987	3	3	0	0	0	3	3	1	A;A;A	UUAACUAAUAG;UUUAACUAAUA;UGCUUUAACUA	16;17;20	1;1;1	Awan_Short	25	14	3.88072	3.94576	8.66667	7.5	4.18131	3.94804	GTAAGTTATTAGCTAAAAGAAGAGCCGTTTGATTAATTATTAGTTAGTACTAAAGGTTCATTAAAGGCTCTATAAATCATTGTAGATGGTGTTCAAATGAATATCACCGGAAACGATTTTTATGATTGTGCTTTAACTAATAGAGGTTTACAAAG	AACUAAU	CUUUAAC	20	1	AACUAAU	16	1	NA	YES	No	No	NA	No	SPAC15E1.05c_intron1	AACUAAU	14	1	YES	No
I	351895	351959	65	1	SPAC630.03	SPAC630.03.1:exon:4-SPAC630.03.1:exon:5	int_34	3	3	0	0	0	3	1	1	A	UUUACUGACAU	10	3	Awan_Short	37	41	3.87668	2.64493	19	21	7.44129	7.47259	GTATGTCATTATCTTATGTTTGTATATTTTTTAGTTTACCCGTAGAGATTTACTGACATGTTTAG	UACUGAC	UACUGAC	10	3		NA	NA	NA	No	YES	No	No	No	NA	NA	0	0	No	No
III	1809914	1809983	70	1	SPCC285.08	SPCC285.08.1:exon:3-SPCC285.08.1:exon:4	int_4731	6	6	0	0	0	3	1	1	A	UUUACUAAUGC	13	6	Awan_Short	48	25	2.83117	1.85995	8.16667	5.2	7.45368	7.23911	GTACGTGTTGAAGCATAGGGGTGGAGTCATCGAAATTTTTTTTGTATGGTTTTACTAATGCACTTTCTAG	UACUAAU	UACUAAU	13	6		NA	NA	NA	No	YES	No	NA	No	SPCC285.08_intron3	UACUAAU	11	5	YES	No
I	3187942	3188048	107	-1	SPAC1486.02c	SPAC1486.02c.1:exon:2-SPAC1486.02c.1:exon:1	int_1865	6	6	0	0	0	4	1	1	A	ACUUCUAACUU	17	6	Awan_Short	47	53	3.91942	3.31815	8	18	5.05631	5.07682	GTATGTTAATGACTAGTTAAACGATATTTTTTATTCTTTTTGTTTTTCTTTTAGAGCTTCATTTGATAATGGCTTGTAATGAGACTTCTAACTTACAAAACGTATAG	UUCUAAC	UUCUAAC	17	6		NA	NA	NA	No	YES	No	NA	No	SPAC1486.02c_intron1	UUCUAAC	15	3	YES	No
III	2201853	2201988	136	1	SPCC830.10	SPCC830.10.1:exon:3-SPCC830.10.1:exon:4	int_4824	23	17	6	0	0	15	3	2	A;A;A	CCUUCUAACGC;ACCUUCUAACG;GCUGAUCAAUG	10;11;101	19;3;1	Awan_Short;Awan_Long	42	28	5.88793	6.12673	5.375	2.41667	5.99697	5.93033	GTAAGTTCAAATGATGGTTTAGGATTATGCTGATCAATGCAACGAATTATTATCGCAATGGTTATTCGATTGAATCTTGTTTTTACTTCTCTTTGTCATTCTTCATTTTATCGGAGCAACCTTCTAACGCTAATAG	CGCUAAU	UUCUAAC	10	19	UGAUCAA	101	1	NA	No	No	No	NA	No	SPCC830.10_intron3	UUCUAAC	8	5	YES	No
I	636315	636384	70	1	SPAC1F3.09	SPAC1F3.09.1:exon:4-SPAC1F3.09.1:exon:5	int_106	3	3	0	0	0	3	2	1	A;A	UAUACUAACGA;UUAUACUAACG	9;10	2;1	Awan_Short	8	1	5.15309	5.0926	1.28571	0.181818	2.84299	2.64938	GTACGTTTATACACTCCAATGTTTGCGACACGCTGTTTAAATTTTACTCTTTTTTATACTAACGACTCAG	UACUAAC	UACUAAC	9	2		NA	NA	NA	No	YES	No	NA	No	NA	NA	0	0	No	No
I	4257133	4257272	140	-1	SPAC21E11.05c	SPAC21E11.05c.1:exon:2-SPAC21E11.05c.1:exon:1	int_2114	1	1	0	0	0	1	1	1	A	AGCGCUAACAU	11	1	Awan_Short	7	9	3.80079	4.37091	8	10	4.76908	4.73656	GTATGTAAATCACTATTAGATGTGAGTTTCGAAGCAAATTTTTTGGTATTAAATGATATTTGTTTACCAACTAATCTAGTTGCTTTTGGAAATCTTTCATTCTTCATAAAAAAGTGGTGATGAGCGCTAACATGTGTTAG	CGCUAAC	CGCUAAC	11	1		NA	NA	NA	No	YES	No	NA	No	NA	NA	0	0	No	No
I	3463128	3463258	131	1	SPAC3A11.05c	SPAC3A11.05c.1:exon:1-SPAC3A11.05c.1:exon:2	int_713	24	17	7	0	0	18	2	2	A;A	ACUAUUAACAA;AACUAUUAACA	17;18	21;3	Awan_Short;Awan_Long	38	23	5.70838	5.87228	19.5	24	2.48386	2.11271	GTATGAAAAAAATTGATTGCTTATGCAGGTAGATCTTGTTTATTGAGTCAGAGACAAACTCTCAAGACTCTGGTTTTTCTCGCTTTACCCAATTACCAATAGGATAAACTATTAACAAAAAATTTTCTTAG	UAUUAAC	UAUUAAC	17	21		NA	NA	NA	No	YES	No	NA	No	SPAC3A11.05c_intron1	UAUUAAC	15	3	YES	No
I	327392	327497	106	1	SPAC12G12.11c	SPAC12G12.11c.1:exon:2-SPAC12G12.11c.1:exon:3	int_28	4	4	0	0	0	4	1	1	A	CAAACUAACAC	13	4	Awan_Short	15	17	4.17113	3.84627	8	18	6.0695	6.23073	GTAAGTTTTTACTTATCTGTCGTGCATACTTTCTTCAGTTTACTGCTTGAGAGACTTTAGCCTTATAATTTGCTATATGTTTTTTACAAACTAACACTTCAAATAG	AACUAAC	AACUAAC	13	4		NA	NA	NA	No	YES	No	No	No	NA	NA	0	0	No	No
II	3178946	3179106	161	1	SPBC776.04	SPBC776.04.1:exon:3-SPBC776.04.1:exon:4	int_3059	16	15	1	0	0	7	1	2	A	AUCACUAAUAU	15	16	Awan_Short;Awan_Long	18	17	3.40212	3.29058	3.8	2.57143	4.54541	4.75476	GTAAGTCTTGGTTCAAGCTAAATTTTGAAGCGTATACTTGATGTCTGTTACCAGCTTCGTATTTTAAGTGATGAGTGGTATAAATTTCGAGTATTTAGTTCAAGTTATTACAGCATTTTTAACCCTTAAATATATTCAAATCACTAATATTTGGAACCTAG	CACUAAU	CACUAAU	15	16		NA	NA	NA	No	YES	No	NA	No	SPBC776.04_intron3	CACUAAU	13	2	YES	No
II	2348812	2348897	86	1	SPBC19G7.02	SPBC19G7.02.1:exon:2-SPBC19G7.02.1:exon:3	int_2868	2	2	0	0	0	2	1	1	A	UUAAUUAACCU	15	2	Awan_Short	6	4	1.94922	1.56297	1	1.25	4.36132	4.39389	GTAAGTACCGAGATAACTAATGTCTTTTTTACACATTTTTTAAAAGCTTGAATAAGCCAGATATTTAATTAACCTCCTTTATACAG	AACUAAU	AAUUAAC	15	2		NA	NA	NA	No	No	No	NA	No	NA	NA	0	0	No	No
II	3811993	3812141	149	-1	SPBC21C3.09c	SPBC21C3.09c.1:exon:2-SPBC21C3.09c.1:exon:1	int_4221	22	8	14	0	0	9	1	2	A	AAUACUAAUUU	13	22	Awan_Short;Awan_Long	29	13	6.82165	7.11702	7.5	7	3.79898	2.93033	GTACGTTGTTACAAGTTCAAGATTTATTGATGATTCGAAGATATGGTTACTTGGAATCAAAAAAGCTGAAGGTCCAAAACGTCACTGAATTGTCGAGGATCTTAAACTTTTATTTTACATTTGAAGTAGAATACTAATTTTATATTTAG	UACUAAU	UACUAAU	13	22		NA	NA	NA	No	YES	No	NA	No	SPBC21C3.09c_intron1	UACUAAU	11	3	YES	No
I	1282168	1282340	173	-1	SPAPB17E12.10c	SPAPB17E12.10c.1:exon:2-SPAPB17E12.10c.1:exon:1	int_1411	17	11	6	0	0	10	2	2	A;A	AUUGCUAACUA;UAUUGCUAACU	9;10	14;3	Awan_Short;Awan_Long	8	11	6.78948	6.50413	4.5	12	3.28802	3.57984	GTAAGTTCAATTGTTAAAAGGGTCCCGTCGAAATGTCAACAGACGTCCGTTGCAAGGTATTCTTAGGAGCATACTGCATCTAAGAAACTGTCGTACATATTCCGTATATCTGCTGAACTTTTCAAGGTTCAATTAATATTTTTCTATGGAGTTGTTTATTGCTAACTATTAAG	UGCUAAC	UGCUAAC	9	14		NA	NA	NA	No	YES	No	NA	No	NA	NA	0	0	No	No
II	1834450	1834578	129	-1	SPBC9B6.11c	SPBC9B6.11c.1:exon:2-SPBC9B6.11c.1:exon:1	int_3741	16	10	6	0	0	11	2	2	A;A	UUUAUUAACUG;UUUUAUUAACU	12;13	14;2	Awan_Short;Awan_Long	294	175	7.37828	7.38739	147.5	176	6.74487	6.37174	GTATGAAAAAAAATTTTCGTTCATCTAGTCGAGCAACAATAAGAAGGTTGTTGTGAAACTTTTTTTAAGACCGAATCTCTACTCCTTTGTTTAATTTTTTGTTGCTCAATTTTATTAACTGATTATTAG	AACUGAU	UAUUAAC	12	14		NA	NA	NA	No	No	No	No	No	SPBC9B6.11c_intron1	UAUUAAC	10	2	YES	No
I	2380027	2380171	145	-1	SPAC22H10.05c	SPAC22H10.05c.1:exon:2-SPAC22H10.05c.1:exon:1	int_1685	3	3	0	0	0	2	1	1	A	UUUCCUAACAU	10	3	Awan_Short	157	117	4.34532	4.13125	22.5714	11.8	5.85061	5.5873	GTAAGTTCGTGGTGATATTGTTGTTTACGACATGAAGTAGCTTACTTTTGCTACTTCAGATTCTAGCAAATATTTACTTAATTTATTTAACTCTTTCTTTAAATTTTTTTTTTCTTTCTTGGAAGTATTTTCCTAACATGTTTAG	UCCUAAC	UCCUAAC	10	3		NA	NA	NA	No	YES	No	NA	No	SPAC22H10.05c_intron1	UCCUAAC	8	2	YES	No
II	2293776	2293876	101	-1	SPBC16H5.04	SPBC16H5.04.1:exon:3-SPBC16H5.04.1:exon:2	int_3835	2	2	0	0	0	2	1	1	A	UUCUCUAACAA	10	2	Awan_Short	17	28	5.3897	5.46852	1.63636	5.8	4.45795	5.19455	GTACGTTGGTTTGGAAGATTGGTTGTTTCGTCTTTCTTAATAAAATGGGTAGATAAACGAATTCAATCTACCATGGTTCATCTATTCTCTAACAATTCTAG	CUCUAAC	CUCUAAC	10	2		NA	NA	NA	No	YES	No	NA	No	NA	NA	0	0	No	No
I	306211	306315	105	1	SPAC18B11.07c	SPAC18B11.07c.1:exon:3-SPAC18B11.07c.1:exon:4	int_24	4	4	0	0	0	3	2	1	A;A	CUUACUUAUUG;UUUACUUACUU	11;15	2;2	Awan_Short	55	57	4.68361	4.20098	14	8.28571	5.47899	5.54285	GTATGCTTAGTCATTGTATTTAGACAAGTCTTAAATTAGATTATTTGATTTGTTGTAATTTACTTTTTTCTTGGTTTTTTTTGTTTACTTACTTATTGGCTTTAG	AUUUGAU	UACUUAC	15	2	UACUUAU	11	2	NA	YES	No	No	NA	No	NA	NA	0	0	No	No
II	771576	771755	180	1	SPBC577.11	SPBC577.11.1:exon:1-SPBC577.11.1:exon:2	int_2495	12	8	4	0	0	9	1	2	A	AAUGCUAACAA	12	12	Awan_Short;Awan_Long	46	33	9.35073	9.57792	7.83333	8.5	7.5177	7.11772	GTAAGTTCTTACAAGTGTTGGATAGTGGTTTGTAAAATGGTTCCAAAATTTACCTCTGTATATACAACGTACTGGAGACTCTAATACCATAAAATAGGAATAACATTAGTCCTTTGATAACTTGAGAAATCGATTTTTCAACCTATTCATCCATCGCACTAAATGCTAACAACAGCTTAG	UGCUAAC	UGCUAAC	12	12		NA	NA	NA	No	YES	No	NA	No	SPBC577.11_intron1	UGCUAAC	10	2	YES	No
II	584936	585051	116	-1	SPBC354.14c	SPBC354.14c.1:exon:5-SPBC354.14c.1:exon:4	int_3488	3	3	0	0	0	3	1	1	A	UCAACUAACUA	13	3	Awan_Short	6	3	5.63644	5.67968	7	0.5	4.6443	4.09961	GTAAGTTATACATTTGTCGCTAATTATTTGTTAATCTATTGAGCTTTGTTTTGAGCAAAAAGTTTCAATTAGTGGTTGTCTCATAATCTATGGATATCAACTAACTATGATACTAG	AACUAAC	AACUAAC	13	3		NA	NA	NA	No	YES	No	NA	No	SPBC354.14c_intron4	AACUAAC	11	2	YES	No
I	4985907	4986021	115	-1	SPAC1952.10c	SPAC1952.10c.1:exon:2-SPAC1952.10c.1:exon:1	int_2274	33	33	0	0	0	19	2	1	A;A	CAAGCUAACCG;UCAAGCUAACC	18;19	31;2	Awan_Short	4	2	3.17385	4.03126	1.25	0.6	1.99302	1.6474	GTAAGTTAATTGTCTCCAAAAAAAGCTAAAATGGCATTGTTTGTCTTTTGTCGATTCATATGGTTGACGCACTTGAGATCTAAACCAATTCAAGCTAACCGAATTATACGTTTAG	AGCUAAC	AGCUAAC	18	31		NA	NA	NA	No	YES	No	NA	No	SPAC1952.10c_intron1	AGCUAAC	16	2	YES	No
II	2921313	2921440	128	1	SPBC1703.04	SPBC1703.04.1:exon:1-SPBC1703.04.1:exon:2	int_2985	8	7	1	0	0	4	2	2	A;A	ACUUCUAACUA;CUAACUAAUUA	10;6	5;3	Awan_Short;Awan_Long	2	1	6.252	6.74411	1.5	0.285714	1.48619	0.903541	GTAAGCTAGTTTATGAATTTATGAAATTGTAGTATTTAGATTACTTTCTGTACCGTATACTGAATGGCGTGAATTGCATGAATTAAACGTAGCTAAAATCTTATTCTGTTGACTTCTAACTAATTAAG	AACUAAU	UUCUAAC	10	5	AACUAAU	6	3	NA	YES	No	No	NA	No	SPBC1703.04_intron1	UUCUAAC	8	5	YES	No
II	2426596	2426784	189	1	SPBC21D10.09c	SPBC21D10.09c.1:exon:1-SPBC21D10.09c.1:exon:2	int_2889	21	8	13	0	0	15	2	2	A;A	AAUGCUAAUCU;AAAUGCUAAUC	12;13	18;3	Awan_Short;Awan_Long	15	4	7.86309	7.87324	1.6	0.714286	3.75658	3.37854	GTAAGTAAAGATGTGAGAAGATGGTAACAAAATGGGTTTGCACACAAAATAGGGTCTTTCTCATTGGATATATGCAGAACACCTATGTTATTACAAATCCATACTTTTCCATATTTTGGGGAAGTTTGTTTAAAAATACAACGATTCTTTTTTCTTTATGTATGTGCCGAAATGCTAATCTCTTTATAG	UGCUAAU	UGCUAAU	12	18		NA	NA	NA	No	YES	No	NA	No	SPBC21D10.09c_intron1	UGCUAAU	10	1	YES	No
II	1138203	1138367	165	1	SPBC409.03	SPBC409.03.1:exon:2-SPBC409.03.1:exon:3	int_2568	1	1	0	0	0	1	1	1	A	AAUGUUGACAA	13	1	Awan_Short	2	4	4.09663	4.74392	0.428571	0.454545	4.0785	3.63335	GTAAGTGTGGTAAAGTGATGCTAGAAATGGTAGAAAATATGAGTTATGCGCCTTTACGCGCGTTCAGGTTCATTTTGGGAAAAGCAATGTATTGCCGTTCCATCAAATCTATTCAAGTCATCATCAAGCTTGTCTCGTTTTATCTAATGTTGACAAATGATTTAG	AUCUAAU	UGUUGAC	13	1		NA	NA	NA	No	No	No	NA	No	NA	NA	0	0	No	No
III	1001948	1002144	197	-1	SPCC895.04c	SPCC895.04c.1:exon:2-SPCC895.04c.1:exon:1	int_5087	3	0	3	0	0	2	2	1	A;A	AUUGCUAACGU;GAGUUCAAAUU	10;18	2;1	Awan_Long	20	19	8.68712	8.921	10.5	20	4.99881	5.02919	GTAAGTTTGAGGACGAGTTTTCTGTAATTATTGAACCAATCGGAAATTTAACCTCAACTCAATTGATCACTGTGGAGATGCGCTACCATAATATACGATTAATTATTGAGTGGGATTGGTTTAAATTTTTGACAGTATTAACTTTTGTTATTGCTTTCTATATCTAATCAGAGAGTTCAAATTGCTAACGTTAGCAG	UGCUAAC	UGCUAAC	10	2	GUUCAAA	18	1	NA	No	YES	No	NA	No	NA	NA	0	0	No	No
II	765170	765270	101	1	SPBC577.07	SPBC577.07.1:exon:2-SPBC577.07.1:exon:3	int_2489	14	14	0	0	0	12	2	1	A;A	AGUUCUAACAC;AAGUUCUAACA	10;11	12;2	Awan_Short	1	0	5.09231	4.29449	0.666667	0.5	3.31873	3.42044	GTAAGTATCGTGGGGAATTGTTTTGTTTTCTTTTATAAAGCTTACTATGAAAAAGTGATAGGATTCATTTTATTTAATGGTTTAAGTTCTAACACTTGTAG	UUCUAAC	UUCUAAC	10	12		NA	NA	NA	No	YES	No	NA	No	SPBC577.07_intron2	UUCUAAC	8	4	YES	No
I	2178888	2179019	132	-1	SPAC13F5.04c	SPAC13F5.04c.1:exon:3-SPAC13F5.04c.1:exon:2	int_1632	2	2	0	0	0	2	1	1	A	GGUACUAACCG	21	2	Awan_Short	9	8	4.05901	3.32335	10	9	2.46122	2.05259	GTAAGTTTAGAAAACATCCTTTTCCTTTTTTTAAATGTTGGCGAGGGTTTTTTCTCTTTTTTTTTTTTTTTGGATTACGAGACCAACTATGTAAATGTTTCTGTGGTACTAACCGCTCTATGGCGTGTGTAG	UACUAAC	UACUAAC	21	2		NA	NA	NA	No	YES	No	No	No	SPAC13F5.04c_intron2	UACUAAC	19	1	YES	No
III	596513	596666	154	-1	SPCC1183.03c	SPCC1183.03c.1:exon:3-SPCC1183.03c.1:exon:2	int_4987	12	7	5	0	0	10	2	2	A;A	GGUACUAACCU;CGGUACUAACC	12;13	8;4	Awan_Short;Awan_Long	9	15	4.48374	5.08701	2.5	5.33333	4.60074	4.42081	GTAGGTACAGTCAGCTATTGCCAAACATGTTTCCTATAGTATCGAGTGCTTAAAGGAAATTTTTAGTCTTAGTATAATTATGACCTTAAGTCCCATTATATTAGACTAGCATCCAAGTTTAGTCTTGTTAGAATCGGTACTAACCTAAAACCAG	UACUAAC	UACUAAC	12	8		NA	NA	NA	No	YES	No	NA	No	NA	NA	0	0	No	No
II	2685887	2686005	119	1	SPBC3E7.14	SPBC3E7.14.1:exon:1-SPBC3E7.14.1:exon:2	int_2938	6	6	0	0	0	5	2	1	A;A	UAUACUAACGU;UUAUACUAACG	15;16	5;1	Awan_Short	110	89	4.00423	3.90176	37	45	5.40167	5.42003	GTTAGTAAATTTTAAATGTTAGAATTCAAATTTTTATCGTGAATTAAATAGCACATGATAATTCAATTTCGAAACACATGTTAGTTTGTTTTTGTCTTATACTAACGTGATTTTAATAG	UACUAAC	UACUAAC	15	5		NA	NA	NA	No	YES	No	NA	No	SPBC3E7.14_intron1	UACUAAC	13	3	YES	No
I	609502	609697	196	1	SPAC3H8.10	SPAC3H8.10.1:exon:2-SPAC3H8.10.1:exon:3	int_94	2	2	0	0	0	2	2	1	A;A	AUAGAAAAACU;AUUCCAUAUAA	86;118	1;1	Awan_Short	156	130	6.64036	6.51202	22.4286	32.75	6.41771	6.54566	GTAAGTAAATTCAAATGATTAAATGTATCTCCAGTAATTCTCATAATCAAACCTTTCCTTTGGATTTGCATATTCCATATAAGGCTGGTTTTTCGGCTTTTTAATAGAAAAACTTTTGGTTTTCTACTGTGTTGAATTTTTTGTGATATATTTTTTCATTTTGATATTTCTTTTCATCTTTATTAACCGTCTTCAG	UAUUAAC	AGAAAAA	86	1	UCCAUAU	118	1	NA	No	No	No	NA	No	NA	NA	0	0	No	No
I	1602594	1602680	87	-1	SPAC23H4.04	SPAC23H4.04.1:exon:3-SPAC23H4.04.1:exon:2	int_1498	4	4	0	0	0	4	1	1	A	AUUACUAAACU	13	4	Awan_Short	12	18	3.93254	3.97924	13	9.5	3.21541	3.75049	GTAATTCGCAATTCTTTAAATTGACTCTAAAAGAGAAATGCTTTGATGTGAAAGATTTTTGAAACTTATTACTAAACTTTGGTTTAG	CUUUGAU	UACUAAA	13	4		NA	NA	NA	No	No	YES	NA	No	SPAC23H4.04_intron2	UACUAAA	11	1	YES	No
II	1653994	1654100	107	-1	SPBC21B10.09	SPBC21B10.09.1:exon:2-SPBC21B10.09.1:exon:1	int_3708	6	6	0	0	0	5	1	1	A	UAUAUUAACAA	10	6	Awan_Short	19	26	2.44138	2.62627	20	13.5	4.94393	4.83331	GTAAGTCAATTCTAATTTTTTTCAACCATCATTCCTTAATTGTTATTGTATGGATAGTTGATTTATTTACTCACATGTGTGTGCATTTATTATATTAACAATTCAAG	UUCUAAU	UAUUAAC	10	6		NA	NA	NA	No	No	No	No	No	SPBC21B10.09_intron1	UAUUAAC	8	2	YES	No
I	605356	605437	82	-1	SPAC3H8.09c	SPAC3H8.09c.1:exon:2-SPAC3H8.09c.1:exon:1	int_1245	29	29	0	0	0	17	2	1	A;A	CUUGCUAACGU;CCUUGCUAACG	11;12	25;4	Awan_Short	6	7	3.5415	3.76918	1.75	4	2.79475	3.4236	GTAAGGAATTATCGTTGCTGCAATTAATTTCGCAAAACATCGCAATTTTGTTTGTTTTTTTAGCCTTGCTAACGTAATACAG	UGCUAAC	UGCUAAC	11	25		NA	NA	NA	No	YES	No	NA	No	SPAC3H8.09c_intron1	UGCUAAC	9	4	YES	No
I	4365845	4366008	164	1	SPAC23D3.16	SPAC23D3.16.1:exon:2-SPAC23D3.16.1:exon:3	int_873	7	0	7	0	0	2	1	1	A	AAAAUACACAU	133	7	Awan_Long	127	99	4.28472	4.61353	21.3333	14.2857	6.73805	6.68012	GTATGTAAAATCTAAAAAATAAAAAAAATACACATATTGTATATTCATAAGTCTTTGTTTAATTCTCAATGCTTTTGTTTTTGAGTGATTTATGAATCAGTTGACACATATCATTCAATCTCTCTTTATTAAGTGACTTAACACTTTGCTAACTTTTACTAAAG	UGCUAAC	AAUACAC	133	7		NA	NA	NA	No	No	YES	No	No	NA	NA	0	0	No	No
I	782705	782802	98	-1	SPAC4G8.11c	SPAC4G8.11c.1:exon:2-SPAC4G8.11c.1:exon:1	int_1287	1	1	0	0	0	1	1	1	A	AAUAUUGACAC	11	1	Awan_Short	7	3	1.9307	1.85995	8	4	1.70711	1.19157	GTATGAACAATTGGTTAAAAGTAATATTCATTTCTGGAAATTTCAAATAAGAATGAAAAAAAATTAGTTTATTGCTTAAAAATATTGACACGTTTTAG	UAUUGAC	UAUUGAC	11	1		NA	NA	NA	No	YES	No	NA	No	NA	NA	0	0	No	No
III	816248	816393	146	-1	SPCC1393.09c	SPCC1393.09c.1:exon:2-SPCC1393.09c.1:exon:1	int_5059	24	21	3	0	0	13	2	2	A;A	UUGAUUAACAU;AUUGAUUAACA	11;12	22;2	Awan_Short;Awan_Long	30	25	6.01221	5.95321	3.44444	1.625	5.07187	5.33745	GTAAGTCAAATATTGTTATTTGTTTATAAATTTTTTCGGAAAGAGTGAGATTTCATAAATGTGCATAATATTTTATTGATTCAAATATTTGCTCTGCAAATTTAATAGACCATCAATTGGAAAATTTATTGATTAACATTAGTTAG	GAUUAAC	GAUUAAC	11	22		NA	NA	NA	No	YES	No	NA	No	SPCC1393.09c_intron1	GAUUAAC;UGAUUAA	9;10	10;1	YES	No
I	3114277	3114362	86	-1	SPAC688.02c	SPAC688.02c.1:exon:2-SPAC688.02c.1:exon:1	int_1851	4	4	0	0	0	3	1	1	A	GAUUUUAACAC	12	4	Awan_Short	2	2	2.27115	2.41096	3	3	1.97339	2.04281	GTGTGTTTCATAATCCCATGTAGTTTAGAGCTTTTATTTATGCTTTTAATTTGAAATTAGAAAATCTGATTTTAACACTTTATAAG	AUCUGAU	UUUUAAC	12	4		NA	NA	NA	No	No	No	NA	No	SPAC688.02c_intron1	UUUUAAC	10	4	YES	No
I	4760652	4760751	100	-1	SPAC1782.02c	SPAC1782.02c.1:exon:2-SPAC1782.02c.1:exon:1	int_2212	7	7	0	0	0	7	1	1	A	AUAUCUGACCA	15	7	Awan_Short	77	66	2.05356	1.8308	26	33.5	5.17607	4.96538	GTATGTGATTATAACTTTATTGTTTTAGTAGATAGTATTTTTTTTTTTTTTTTAATTTCTTGATTAATGTTTGAAGTGATATCTGACCATTATAATTTAG	AUCUGAC	AUCUGAC	15	7		NA	NA	NA	No	YES	No	NA	No	SPAC1782.02c_intron1	AUCUGAC	13	2	YES	No
II	2959781	2959878	98	-1	SPBC2A9.07c	SPBC2A9.07c.1:exon:3-SPBC2A9.07c.1:exon:2	int_3986	21	21	0	0	0	18	3	1	A;A;A	UCAGUUAACCA;AUCAGUUAACC;UCGAAAAAUAA	11;12;34	15;5;1	Awan_Short	20	19	2.56813	2.75303	4.2	5	4.22021	4.57615	GTATATATAGCTATTTACCAGAATTTATGTAGTTGTCCAAATCATTATGCACAGCATTCGAAAAATAAAAGGAACTATCATCAGTTAACCATTTTTAG	AGUUAAC	AGUUAAC	11	15	GAAAAAU	34	1	NA	No	YES	No	NA	No	SPBC2A9.07c_intron2	AGUUAAC	9	4	YES	No
III	659489	659566	78	1	SPCC16C4.01	SPCC16C4.01.1:exon:2-SPCC16C4.01.1:exon:3	int_4509	1	1	0	0	0	1	1	1	A	GUUAUUAACAU	17	1	Awan_Short	8	12	2.54952	1.70383	4.5	13	3.62398	4.15118	GTATGCAAATTACTTTGGGTGACAGTCATTATCATATTGTTGTATCTTTAAGCAGTTATTAACATTTGTAATTTTTAG	UAUUAAC	UAUUAAC	17	1		NA	NA	NA	No	YES	No	NA	No	NA	NA	0	0	No	No
II	3065033	3065177	145	-1	SPBC30D10.16	SPBC30D10.16.1:exon:2-SPBC30D10.16.1:exon:1	int_4015	16	9	7	0	0	14	2	2	A;A	AAUAGUAACAA;AAAUAGUAACA	13;14	11;5	Awan_Short;Awan_Long	3	2	7.2012	7.55348	0.333333	0.428571	2.29749	1.92188	GTGTGTTTAACTTTATAATCCAAATATTAAGGAAGGAACAAACTGAAGATGAGAATGCTTTAAAGGTCTTTTTTGAAGTAATTTCATTCGAGGGGTTAAACTATCTTAGTTGATATAAAATTACAAATAGTAACAAATATAATAG	AGUUGAU	UAGUAAC	13	11		NA	NA	NA	No	No	YES	NA	No	SPBC30D10.16_intron1	UAGUAAC	11	2	YES	No
I	5098406	5098506	101	-1	SPAC1250.03	SPAC1250.03.1:exon:3-SPAC1250.03.1:exon:2	int_2303	6	6	0	0	0	6	1	1	A	UUUUCUAACCU	10	6	Awan_Short	310	279	5.57525	5.72333	155.5	56	8.25929	8.3991	GTAAGCATTTTATCGTATTTCTGTATGGAGTAATCATTGATCACATTTTTAAACGAGATACATAATTATTTATATATTTATGAATTTTCTAACCTGTTTAG	UUCUAAC	UUCUAAC	10	6		NA	NA	NA	No	YES	No	NA	No	SPAC1250.03_intron2	UUCUAAC	8	1	YES	No
III	2089518	2089618	101	1	SPCC576.05	SPCC576.05.1:exon:2-SPCC576.05.1:exon:3	int_4783	2	2	0	0	0	2	2	1	A;A	UCAUACUAACC;AGUUAGCAGCA	10;43	1;1	Awan_Short	0	0	7.49535	7.62747	0.166667	0.25	5.11717	5.04034	GTAAACTTAAAATGCTGATTTTGTGGGACTTGAATTTTTTATGAGCATTTTAGTTAGCAGCACTCTTTCTTTTCATATATTTTATCATACTAACCTTTTAG	UACUAAC	UUAGCAG	43	1	AUACUAA	10	1	NA	YES	No	No	NA	No	NA	NA	0	0	No	No
I	3853113	3853189	77	1	SPAC4H3.13	SPAC4H3.13.1:exon:1-SPAC4H3.13.1:exon:2	int_810	2	2	0	0	0	2	1	1	A	UUUGCUAAUAC	17	2	Awan_Short	42	50	2.56813	2.98548	21.5	25.5	5.43182	5.21344	GTAAGTAGCTATTTGTCGTTCATTCAGCTTCCCTTAATTATATTTATAAATGATTTGCTAATACCTGTAATATGTAG	UGCUAAU	UGCUAAU	17	2		NA	NA	NA	No	YES	No	NA	No	NA	NA	0	0	No	No
II	3348236	3348300	65	1	SPBC11C11.02	SPBC11C11.02.1:exon:2-SPBC11C11.02.1:exon:3	int_3138	1	1	0	0	0	1	1	1	A	UAUUCUAACUU	13	1	Awan_Short	13	8	2.52304	1.2299	2.8	4.5	3.24424	3.14374	GTGAGAAATTTGAGGTGAAGCAGGGTTTAACATGCTATGATCGTTTATTCTAACTTCAACCTTAG	UUCUAAC	UUCUAAC	13	1		NA	NA	NA	No	YES	No	No	No	SPBC11C11.02_intron2	UUCUAAC	11	1	YES	No
I	3619704	3619807	104	-1	SPAC17G6.15c	SPAC17G6.15c.1:exon:6-SPAC17G6.15c.1:exon:5	int_1963	9	9	0	0	0	6	2	1	A;A	UUUACUAAUGU;CUUUACUAAUG	12;13	8;1	Awan_Short	58	33	2.92297	3.13679	6.55556	4.85714	5.20229	4.93468	GTATGAGTTTTAGCCTAAGTTTATTTATTCTGGGTACAAACCTATGTATTGAAGTTTCATACATTGGTTTTGTGTTTTTTCATTCTTTACTAATGTTTGTATAG	UACUAAU	UACUAAU	12	8		NA	NA	NA	No	YES	No	NA	No	SPAC17G6.15c_intron5	UACUAAU	10	5	YES	No
III	190846	191022	177	1	SPCC1235.07	SPCC1235.07.1:exon:1-SPCC1235.07.1:exon:2	int_4398	1	1	0	0	0	1	1	1	A	UAUGCUAACUG	18	1	Awan_Short	20	14	3.39973	3.00705	21	15	2.93491	2.41937	GTAAGTAATTGAGAATCATGTTATTGCTAAAAGTGCTTGTGCTTTTTAGCGCTTACTTGTGTACTGAAAGGGAAATCAAAGTTTGCTGTTGATGTTTACCTGGAAAAGTCTTTTAAGTACTTTTCCAAATTTTTTTAGTCATTATGTGTACGTATGCTAACTGTGCTATCGTAACAG	UGCUAAC	UGCUAAC	18	1		NA	NA	NA	No	YES	No	No	No	SPCC1235.07_intron1	UGCUAAC	16	1	YES	No
II	3186757	3186875	119	1	SPBC776.07	SPBC776.07.1:exon:1-SPBC776.07.1:exon:2	int_3066	11	9	2	0	0	8	2	2	A;A	CAAUCUAACUA;UCAAUCUAACU	10;11	10;1	Awan_Short;Awan_Long	82	78	5.81158	6.01089	11.8571	9.875	6.72467	6.71073	GTAAGCAATGCTGTTGAGGTCTTAGCATGTATCTGTCAAACATTTTAACTACAATGCGTTGTGGGCCTTCTAAATTCTAATTAAATTATTTTTTAACGTTTTCAATCTAACTACTTTAG	AUCUAAC	AUCUAAC	10	10		NA	NA	NA	No	YES	No	NA	No	SPBC776.07_intron1	AUCUAAC	8	7	YES	No
II	2911313	2911390	78	-1	SPBP4H10.19c	SPBP4H10.19c.1:exon:2-SPBP4H10.19c.1:exon:1	int_3971	1	1	0	0	0	1	1	1	A	GUUACUAACUU	13	1	Awan_Short	27	14	4.58194	3.84133	4	15	3.44183	2.93033	GTAGGTGGTTTTGTTGCCATCAAATAATTGTTGATAACTGGGATTTTTGCATTATTTGGTTACTAACTTATGTATTAG	UACUAAC	UACUAAC	13	1		NA	NA	NA	No	YES	No	NA	No	NA	NA	0	0	No	No
I	3485484	3485581	98	1	SPAC328.05	SPAC328.05.1:exon:4-SPAC328.05.1:exon:5	int_720	5	5	0	0	0	5	1	1	A	GGUACUAACGA	10	5	Awan_Short	17	12	5.67964	6.41014	3	4.33333	4.51041	3.80223	GTAAGTTCAATTTCTAATCCTCTATATTCTTTTCCTCGAACTTTGGTATTTTAATGAATTGTGGAATTGCAAATAAGAAATGGTACTAACGAGTATAG	UACUAAC	UACUAAC	10	5		NA	NA	NA	No	YES	No	NA	No	SPAC328.05_intron4	UACUAAC	8	2	YES	No
I	1094921	1095141	221	-1	SPAC30D11.13	SPAC30D11.13.1:exon:3-SPAC30D11.13.1:exon:2	int_1367	2	1	1	0	0	2	2	2	A;A	UUUACUAACUG;UUAGCUAAUCA	13;61	1;1	Awan_Long;Awan_Short	2	5	5.41413	5.74358	3	6	2.29457	1.47091	GTATGTATTCCAAATGAATATCAGATATTTTTCTTCAAAGCCTTTAATTTGCGCTCCTTAGCTTGGAATTTTGTTTAGACATTCACTACTTTTTTGTTCAAACTGAATTTTAGCTTTATCCTCACGATAAAACATGTCGATATGCATTTCCTTTTAGCTAATCAAAAGTTCACGGCTTTTCGTTTTATTATTTACAAAACATTTACTAACTGCAATCACAG	UACUAAC	UACUAAC	13	1	AGCUAAU	61	1	NA	No	YES	No	NA	No	SPAC30D11.13_intron2	AGCUAAU	59	1	YES	No
II	3924390	3924482	93	-1	SPBC1604.04	SPBC1604.04.1:exon:3-SPBC1604.04.1:exon:2	int_4238	1	1	0	0	0	1	1	1	A	UUUAUUUACUG	21	1	Awan_Short	3	7	2.83633	3.45007	1	8	3.85764	4.05925	GTACGAATGTTTATGGTTATCGTGCCATTTTTATTATTCTATTATCTATTTGTTAAACTCTATGTTTTATTTACTGACATTTTATTCTCTTAG	UACUGAC	UAUUUAC	21	1		NA	NA	NA	No	No	No	NA	No	NA	NA	0	0	No	No
II	2672036	2672173	138	-1	SPBC3E7.07c	SPBC3E7.07c.1:exon:6-SPBC3E7.07c.1:exon:5	int_3918	6	1	5	0	0	6	2	2	A;A	UUAGCUAACAA;UUUAGCUAACA	11;12	4;2	Awan_Long;Awan_Short	43	15	4.24424	4.20263	22	8	4.86921	4.13319	GTATGTACTAGGAATCAAATTTAATGGTCTAAGAAACATGGCCATTTTTTAAGTGCCATTTTTTTAAAAAAAATCGTTTATGCGATCCATGAATTTCCATATTTTAATGTTCTATTTTATTTAGCTAACAAGTCTTAG	AGCUAAC	AGCUAAC	11	4		NA	NA	NA	No	YES	No	NA	No	NA	NA	0	0	No	No
I	4980487	4980561	75	-1	SPAC1952.08c	SPAC1952.08c.1:exon:2-SPAC1952.08c.1:exon:1	int_2273	8	8	0	0	0	4	2	1	A;A	UUUUCUAACAU;UUUUUCUAACA	13;14	7;1	Awan_Short	67	40	3.67023	4.08234	22.6667	41	5.59649	5.57397	GTATGTATCATATTTAAAAGTTTAACTTATCCTTGATCCTGATTGGTATTTTCTTTTTTCTAACATGATGACTAG	UUCUAAC	UUCUAAC	13	7		NA	NA	NA	No	YES	No	No	No	NA	NA	0	0	No	No
I	2828350	2828628	279	-1	SPAC3F10.06c	SPAC3F10.06c.1:exon:2-SPAC3F10.06c.1:exon:1	int_1790	1	1	0	0	0	1	1	1	A	ACGCACAAGCA	200	1	Awan_Short	4	3	7.71795	7.39649	0.714286	0.8	5.24773	5.6673	GTAAGTCTCAATTTGCTATACAAATAAGCTGGCAGAATCAAAAGACTTAGAAAATGATTGCTACCTTTATAAACGCACAAGCAATTAATGCAAATTGTAAGAAAAAACGATGGATAGCTGCTATTAAATTTTCATGAAAAATTTTTAGCCTAATCGCCATTTGTTGGATTTCGTACTGATATATATTTTTGCTGATTTTTACTTGTTTTTCCTTTTTGCCTTGCTTTTCTTTTATTTGTATGTCATCGAATGGAAAATTTGGCTAACACTAATTTCAAG	CACUAAU	GCACAAG	200	1		NA	NA	NA	No	No	No	NA	No	NA	NA	0	0	No	No
II	560029	560150	122	-1	SPBC354.07c	SPBC354.07c.1:exon:3-SPBC354.07c.1:exon:2	int_3484	4	4	0	0	0	3	1	1	A	UUUACUUACUU	18	4	Awan_Short	15	9	5.33957	5.67908	8	2.5	4.58194	4.13678	GTATGAATTGTACTGAGTCCTATAAGATTGAAGGCATAATCAATCTGCTTTCAGCCTTATGCAAGGAATCTTACTTTTTTCTTTGACATTGTAACATTTTACTTACTTTTTCTTCAAAAAAG	CUUUGAC	UACUUAC	18	4		NA	NA	NA	No	No	No	NA	No	NA	NA	0	0	No	No
III	2366867	2366958	92	-1	SPCC70.07c	SPCC70.07c.1:five_prime_UTR:2-SPCC70.07c.1:exon:3	int_5340	10	10	0	0	0	9	1	1	A	GUUACUAACAU	11	10	Awan_Short	7	7	5.93939	6.45662	1.14286	1.6	1.52305	1.81486	GTATATTATCTCCTCTTGGATAATTCGTGAATTACAGAAGACTGAGGATATAGACTCTATAGACGATATATGAAGTTACTAACATTAAGTAG	UACUAAC	UACUAAC	11	10		NA	NA	NA	No	YES	No	NA	No	SPCC70.07c_intron3	UACUAAC	9	1	YES	No
I	1743125	1743298	174	-1	SPAC105.01c	SPAC105.01c.1:exon:3-SPAC105.01c.1:exon:2	int_1541	4	3	1	0	0	4	2	2	A;A	GUUGUUAACAG;UCAGGGCAGUA	12;77	3;1	Awan_Short;Awan_Long	21	15	6.14686	5.92479	22	5.33333	3.29576	3.42582	GTAAGTGATATCGGAAGTAAGAAAGAAGCTTTTAAAAAGTTAATAGATGTTTTATAATTTCTCAGATTGGCACGATAAGAAAGTTGTCAATCAGGGCAGTATTTCTTATCACTCGAAAAAGAGAAGCTTCCTGTACCTACTTTTTGGTTTCTATAGTTGTTAACAGAACAACAG	UGUUAAC	UGUUAAC	12	3	AGGGCAG	77	1	NA	No	YES	No	NA	No	NA	NA	0	0	No	No
II	3737143	3737221	79	-1	SPBC13G1.06c	SPBC13G1.06c.1:exon:2-SPBC13G1.06c.1:exon:1	int_4205	1	1	0	0	0	1	1	1	A	UAUGCUAAUUU	12	1	Awan_Short	65	67	3.9786	3.61145	22	68	6.59587	6.48064	GTTAGTTGAATTACGAGTTTGTTCAATTACAAAGCTTACAAAAATTTTATTTTATAACTTTATGCTAATTTTCTTGCAG	UGCUAAU	UGCUAAU	12	1		NA	NA	NA	No	YES	No	No	No	NA	NA	0	0	No	No
III	1790684	1790766	83	1	SPCC1442.12	SPCC1442.12.1:exon:3-SPCC1442.12.1:exon:4	int_4728	4	4	0	0	0	2	1	1	A	UAUAUUAACUG	17	4	Awan_Short	24	18	-0.999526	-16.6096	12.5	19	4.54717	4.36896	GTACGTTTCTATTACATTCGCTCAAATATGTTTAGAATGCTCTTTTTTTTTATTTTGTTTATATTAACTGATCGATTTTTTAG	AACUGAU	UAUUAAC	17	4		NA	NA	NA	No	No	No	NA	No	NA	NA	0	0	No	No
III	1176873	1176952	80	1	SPCC4B3.02c	SPCC4B3.02c.1:exon:2-SPCC4B3.02c.1:exon:3	int_4618	2	2	0	0	0	2	1	1	A	AAUGCUAACAU	9	2	Awan_Short	27	13	3.37549	3.73769	2.8	1.75	4.99082	4.28264	GTAAACATGAATTCTCTTTCGCTACCAAGTGAAATGGATCATCAAATTGACAGAATAAAGTCATAATGCTAACATTTTAG	UGCUAAC	UGCUAAC	9	2		NA	NA	NA	No	YES	No	No	No	NA	NA	0	0	No	No
II	715453	715531	79	1	SPBC119.02	SPBC119.02.1:exon:1-SPBC119.02.1:exon:2	int_2467	4	4	0	0	0	4	1	1	A	GCAGCUAACAU	13	4	Awan_Short	238	184	5.91719	6.1837	4.97917	5	9.73584	9.57504	GTAAGTCGCGGCTGTAATAGTGCCTTGCGCACTGCCAAAATTTTGCTTGCTAGGATTGTGCAGCTAACATGATATATAG	AGCUAAC	AGCUAAC	13	4		NA	NA	NA	No	YES	No	No	No	SPBC119.02_intron1	AGCUAAC	11	2	YES	No
I	3090048	3090162	115	-1	SPAC16A10.06c	SPAC16A10.06c.1:exon:3-SPAC16A10.06c.1:exon:2	int_1836	6	5	1	0	0	6	2	2	A;A	UGUUCUAACAA;UUGUUCUAACA	10;11	4;2	Awan_Short;Awan_Long	17	11	2.77792	3.06974	18	3	2.44475	2.196	GTACGTACCACGGAAATGACTTTCCTACTTTTTCTATTATATGTAGATGAAGTAAAAACATCAATTTAGACGTATTTTTTTACTGTTTCATATTCAATTGTTCTAACAAAATTAG	UUCUAAC	UUCUAAC	10	4		NA	NA	NA	No	YES	No	NA	No	SPAC16A10.06c_intron2	UUCUAAC;GUUCUAA	8;9	6;2	YES	No
I	5017704	5017781	78	-1	SPAC890.07c	SPAC890.07c.1:exon:2-SPAC890.07c.1:exon:1	int_2287	4	4	0	0	0	3	1	1	A	UUUAUUAACUA	11	4	Awan_Short	19	21	2.67505	2.84133	20	22	5.57712	5.94741	GTATGTTTTTTGCTCTATGATGATACTAATTGTTCTGGATGCAATTCCACTGTTGAGTATTTTATTAACTAAACATAG	UACUAAU	UAUUAAC	11	4		NA	NA	NA	No	No	No	NA	No	NA	NA	0	0	No	No
II	62450	62597	148	-1	SPBPB21E7.11	SPBPB21E7.11.1:exon:3-SPBPB21E7.11.1:exon:2	int_3375	1	1	0	0	0	1	1	1	A	AAAGUUUACUA	16	1	Awan_Short	0	0	0.166044	-0.542134	0.5	1	-1.78434	-16.6096	GTAAGTGTTTATTTTGGCTTTTACTCTTGCTTCCTCATTGAATTTCAAAAATATGAGGAATAAAATGTGTACAATAGGTTTTAAAGGTGATGTGATCTATAATATAGTGTATTTTTTATTCATGAAAAGTTTACTAGTATCATTCTAG	CUAUAAU	AGUUUAC	16	1		NA	NA	NA	No	No	No	NA	No	NA	NA	0	0	No	No
II	3304865	3304944	80	1	SPBC17D11.01	SPBC17D11.01.1:exon:1-SPBC17D11.01.1:exon:2	int_3116	1	1	0	0	0	1	1	1	A	AAAAACUAACU	16	1	Awan_Short	6	3	4.14102	4.15273	7	4	3.12494	2.95109	GTAAGTTTACACATATATTGTGAAATCTCTGTCTAGAAGCGTTTAAGTTTGCTGAATAAAAACTAACTTGTGCTATTAAG	AACUAAC	AAACUAA	16	1		NA	NA	NA	No	No	No	No	No	NA	NA	0	0	No	No
II	2291800	2291889	90	1	SPBC16H5.05c	SPBC16H5.05c.1:exon:3-SPBC16H5.05c.1:exon:4	int_2844	1	1	0	0	0	1	1	1	A	UAUACUAAUUA	11	1	Awan_Short	29	17	3.20556	3.8193	30	18	5.36168	5.6673	GTAAGTTAAATCGTTGATGAGCAACGTTGTAGTCCCAAATGTTGCAACATTAAACTGCTTCGGGTTTACAAATATACTAATTAAATACAG	UACUAAU	UACUAAU	11	1		NA	NA	NA	No	YES	No	NA	No	SPBC16H5.05c_intron4	UACUAAU	9	1	YES	No
I	3118863	3118946	84	-1	SPAC688.06c	SPAC688.06c.1:exon:2-SPAC688.06c.1:exon:1	int_1853	2	2	0	0	0	2	1	1	A	UAUAUUAACUG	12	2	Awan_Short	5	4	2.1531	2.59691	1.5	2.5	2.86853	1.91241	GTATGAAAAAAATATGATATTCTATAGCAAATGATTAGAAATATTACATTGAACTGAAGTAAATGTATATTAACTGAGCTTTAG	UAUUAAC	UAUUAAC	12	2		NA	NA	NA	No	YES	No	No	No	NA	NA	0	0	No	No
II	2000360	2000474	115	-1	SPBP23A10.03c	SPBP23A10.03c.1:exon:2-SPBP23A10.03c.1:exon:1	int_3772	2	2	0	0	0	2	1	1	A	GUUUCUAACUA	14	2	Awan_Short	25	27	4.46073	4.54973	13	14	4.75084	4.57096	GTAAGAAAACTTATATTAGATTGAGGTTTATTATTAAAAGAAGAGAACTTTTACCAGTGCTCTTGAACTTATTGCTTCTTTTTTTGGACCTATAGTTTCTAACTATTATTGGCAG	UUCUAAC	UUCUAAC	14	2		NA	NA	NA	No	YES	No	NA	No	NA	NA	0	0	No	No
III	2119067	2119137	71	-1	SPCC126.02c	SPCC126.02c.1:exon:4-SPCC126.02c.1:exon:3	int_5285	6	6	0	0	0	6	1	1	A	GUCUCUAACCA	12	6	Awan_Short	0	0	2.0331	1.10252	1	1	3.235	2.76783	GTAAGTTTAATGCTGCATTTAAATTCACCGACGTTTACTTCTGCCATTAAATGTCTCTAACCACAGCGCAG	CUCUAAC	CUCUAAC	12	6		NA	NA	NA	No	YES	No	No	No	NA	NA	0	0	No	No
I	1325006	1325085	80	1	SPAC6F12.09	SPAC6F12.09.1:five_prime_UTR:1-SPAC6F12.09.1:exon:1	int_302	7	7	0	0	0	6	1	1	A	GUAUCUAACGA	12	7	Awan_Short	2	4	2.754	3.73769	0.6	0.714286	1.8078	1.4939	GTATGTATAAGTGGATAAATAGGAACATTATAATCTTTTTTATATAAATCGAAGGTTTTTCGTATCTAACGAATTTATAG	AUCUAAC	AUCUAAC	12	7		NA	NA	NA	No	YES	No	NA	No	SPAC6F12.09_intron1	AUCUAAC	10	2	YES	No
III	427584	427751	168	1	SPCC306.10	SPCC306.10.1:exon:1-SPCC306.10.1:exon:2	int_4455	6	6	0	0	0	2	1	1	A	CAUAUUAAUUU	10	6	Awan_Short	0	0	2.37549	2.85995	1	1	-16.6096	-16.6096	GTAAGAATTGTAAATAATAAGAAAGGAATTACTCAATTGAAAGTTGAAACTTGCCATTGCTGTAAAATAACTTGGATGTGATCATTGTTTATAGTCGGCCATGCATGCACACACTTTGATACATGCACTTTCTTTACTAAAGTATTTCAATCATATTAATTTAAACAG	UAUUAAU	UAUUAAU	10	6		NA	NA	NA	No	YES	No	No	No	NA	NA	0	0	No	No
I	3485066	3485240	175	1	SPAC328.05	SPAC328.05.1:exon:2-SPAC328.05.1:exon:3	int_718	15	14	1	0	0	10	2	2	A;A	CUAGCUAAUAU;UCUAGCUAAUA	9;10	14;1	Awan_Short;Awan_Long	19	18	6.01703	6.41084	10	19	5.25709	5.05586	GTAAGTTTGCTTCATAGAGGGTGGGTTTCATGCGACTAGTAAATCATTGTCTATTTAAATTGTAACGTTGAATCGATCCAATTGAACGTTACTTTTAAACGATTACTTATGGCCTATAGCTTATCCTAAAATTTGTCGTATACTCAGATTGTGAATAGTCTAGCTAATATATCAG	AGCUAAU	AGCUAAU	9	14		NA	NA	NA	No	YES	No	NA	No	SPAC328.05_intron2	AGCUAAU	7	4	YES	No
III	2012614	2012829	216	1	SPCC1906.01	SPCC1906.01.1:five_prime_UTR:1-SPCC1906.01.1:exon:1	int_4759	5	0	5	0	0	4	3	1	A;A;A	CCUUACUAACU;CUUACUAACUG;AUGACUAACAU	21;20;96	3;1;1	Awan_Long	530	366	10.2224	10.1496	106.2	122.333	8.6485	8.34994	GTATGTTCTTTTTTATATTGTTTTCGTTAGTATATGGAAATTGGAGTAGTGAAAGAAAGAACGTGGATTCCTTTTGTGATTTGACGTTTCACTTGATATGCGGTTGCGTGGACATGACTAACATTGAAACCGCATGCTAGAGTGTCCCTTTTTTTCCTTGTTCCATTTTTTTCTCCTCTTGATTATTCCCTTACTAACTGAGGGTTGTCTTTTTAG	UACUAAC	UACUAAC	20	1	GACUAAC	96	1	NA	No	YES	No	NA	No	NA	NA	0	0	No	No
II	2681339	2681466	128	-1	SPBC3E7.11c	SPBC3E7.11c.1:exon:3-SPBC3E7.11c.1:exon:2	int_3923	11	6	5	0	0	7	1	2	A	UGAAAUAACAA	11	11	Awan_Short;Awan_Long	13	6	6.84716	7.03799	7	1.75	2.49634	2.06826	GTAAGAATTTATTAAACAAAATTTTGTCTTTTTTACGATTGAGTGAGTTTCTCGTGAAAAAGAGAGCGACTTGCAAATATTTCCTCAACTAGTGTTGGGCGTACTAGAACTGAAATAACAAAGTATAG	AAAUAAC	AAAUAAC	11	11		NA	NA	NA	No	YES	YES	NA	YES	SPBC3E7.11c_intron2	AAAUAAC	9	1	YES	No
I	3490685	3490768	84	1	SPAC328.06	SPAC328.06.1:exon:1-SPAC328.06.1:exon:2	int_722	2	2	0	0	0	2	1	1	A	AUAGCUAACAU	12	2	Awan_Short	22	14	2.3051	1.27499	7.66667	15	6.32931	6.2605	GTAAGTCGTTATTATTTCCCATTTGAGGGAAATAATCATTTTCTCAAATTTTTTCCAGTTTACATATAGCTAACATTTATCTAG	AGCUAAC	AGCUAAC	12	2		NA	NA	NA	No	YES	No	No	No	SPAC328.06_intron1	AGCUAAC	10	1	YES	No
I	641185	641280	96	-1	SPAC1D4.02c	SPAC1D4.02c.1:exon:3-SPAC1D4.02c.1:exon:2	int_1249	3	3	0	0	0	2	1	1	A	UUUUCUAACGA	10	3	Awan_Short	18	7	4.24995	4.54177	9.5	4	3.91605	3.70263	GTAAGTTTCTAGCTGCGGTTAACGATTCTTATATCTTTTTTGGATGTATTTTTATGAACGCTTATTGAATACAAATAAATTTTCTAACGACTACAG	UUCUAAC	UUCUAAC	10	3		NA	NA	NA	No	YES	No	NA	No	SPAC1D4.02c_intron2	UUCUAAC	8	3	YES	No
I	4970006	4970086	81	1	SPAC1952.02	SPAC1952.02.1:exon:1-SPAC1952.02.1:exon:2	int_1030	3	3	0	0	0	3	1	1	A	AUUUUUAACAC	11	3	Awan_Short	19	21	3.84299	3.78688	20	11	4.06138	4.20983	GTATGTCAGAATAAAAAATCTTAGAAAAAGATGGGTTTTTTCAGTAAAGTTATGTATGAATTTATTTTTAACACACGGTAG	UUUUAAC	UUUUAAC	11	3		NA	NA	NA	No	YES	No	NA	No	SPAC1952.02_intron1	UUUUAAC	9	1	YES	No
III	1975428	1975518	91	1	SPCC18.10	SPCC18.10.1:exon:3-SPCC18.10.1:exon:4	int_4752	8	8	0	0	0	5	3	1	A;A;A	CUUAUCUACUA;UCUACUAACAG;AUCUACUAACA	18;14;15	4;3;1	Awan_Short	109	80	3.18962	3.40743	36.6667	40.5	5.07339	4.8146	GTAAGTACGGCCCAATTGTTAATCATGAGGATTTAATAGTTAATCTTCAACTTATGTTTTTTTATTCTTATCTACTAACAGTCTCTCATAG	UACUAAC	UAUCUAC	18	4	UACUAAC	14	3	NA	YES	No	YES	NA	No	SPCC18.10_intron3	UACUAAC	12	2	YES	No
III	1787430	1787610	181	1	SPCC1442.19	SPCC1442.19.1:exon:1-SPCC1442.19.1:exon:2	int_4725	1	1	0	0	0	1	1	1	A	AUUGCUAACGU	16	1	Awan_Short	2	4	7.85721	8.18147	3	1.25	4.08538	3.57312	GTAAGTTTTGTTTATTCGTGTTAGAATCATCGATGTTGTCTATGTACTGGTACCTCAAACATTTTATGCTCAATTCATGTTTAATTCTCTCAAATAACTGCTTGATAATACTTTGTGTGAGGAAGCACTGATCTACGATTCCGTTTCATGCGTTGTTCATTGCTAACGTTTTAAATTCTAG	UGCUAAC	UGCUAAC	16	1		NA	NA	NA	No	YES	No	NA	No	NA	NA	0	0	No	No
III	1732854	1733100	247	1	SPCC1450.04	SPCC1450.04.1:exon:1-SPCC1450.04.1:exon:2	int_4713	4	0	4	0	0	3	1	1	A	CUUUCUAACGU	11	4	Awan_Long	1994	1595	8.49992	8.39312	1995	532	10.8932	10.9326	GTAAGTCATTTTTGTGCGGAAAATGCATCAAAATAATAGTGAAATACCATTTGATCACAAATCGTATTTTTTTTCCTTTGTTAAAAGTTCCCTATGGCATATCTACAAGTGCAAAGACTATTTTTTAAAGCCCTCTCAATTAGACACGATAGCCGTCTTTTAACAAAAAACGTGAAAATGCTTTGTTTGTATCTTTTCACTGAGCTTGATGTTTTTTAATTACCAAATCCTTTCTAACGTTTTATAG	UUCUAAC	UUCUAAC	11	4		NA	NA	NA	No	YES	No	NA	No	NA	NA	0	0	No	No
III	295968	296067	100	-1	SPCC553.06	SPCC553.06.1:exon:3-SPCC553.06.1:exon:2	int_4904	3	3	0	0	0	3	1	1	A	UUUACUAACCU	9	3	Awan_Short	155	80	5.22348	5.21327	39	20.25	6.32205	5.93033	GTACGCTGGGAAAGGTTGAATTGCAGCTTAGAATGTTAATTTAATCTAAGAATTCTCACTTTGAATACTTCTCTTAGCGATTAATTTACTAACCTTATAG	UACUAAC	UACUAAC	9	3		NA	NA	NA	No	YES	No	NA	No	NA	NA	0	0	No	No
I	2218570	2218715	146	-1	SPAC18G6.04c	SPAC18G6.04c.1:exon:2-SPAC18G6.04c.1:exon:1	int_1645	3	1	2	0	0	3	2	2	A;A	AAGUUCUAACG;UGUUCUAAUAA	13;23	2;1	Awan_Long;Awan_Short	96	86	4.85809	5.4887	48.5	43.5	5.14828	5.1409	GTAAAGAAGTTTATTTAAACGCGCTTTTTTGGAGCAAGCAATGACTGTATTTTCTATCTGTGCTGTTTGCTACTATCAACAGGCGATAGATTGACTTGCTCAAATGATTTATGAAGTGTTCTAATAAAGTTCTAACGATAATTAAG	UUCUAAC	GUUCUAA	13	2	UUCUAAU	23	1	NA	No	No	No	NA	No	NA	NA	0	0	No	No
I	798230	798317	88	-1	SPAC16C9.04c	SPAC16C9.04c.1:exon:3-SPAC16C9.04c.1:exon:2	int_1297	2	2	0	0	0	2	1	1	A	GUCGCUAAUGU	10	2	Awan_Short	48	18	4.96045	5.54772	24.5	3.8	4.85947	4.49611	GTATGTAATTCAGATTATAGAATTCTTGTTTAAGCATAATCTTGTTTAAATTCACTTTTATTTTTAAACATGTCGCTAATGTTTTTAG	CGCUAAU	CGCUAAU	10	2		NA	NA	NA	No	YES	No	NA	No	NA	NA	0	0	No	No
I	2759293	2759478	186	-1	SPAC6F6.19	SPAC6F6.19.1:exon:2-SPAC6F6.19.1:exon:1	int_1771	15	11	4	0	0	11	1	2	A	UUAUCUAACCA	10	15	Awan_Short;Awan_Long	40	38	4.68182	5.08234	8.2	7.8	4.89878	5.11017	GTAAGTATCGAGGAAACAAAGGATCATTAAATCTGATGTTCAACCATCGCAAGCCTTGCATCACAAGAATTTATTTGGTGACCGGCCTATTAGTATTATTCGTTCATCCACAACTTAAGCTCTACAATTAGGTTGGAGAAATTTCGCATTTTTGTTTCACTATTGAATTTTATCTAACCATTGTAG	AUCUAAC	AUCUAAC	10	15		NA	NA	NA	No	YES	No	No	No	NA	NA	0	0	No	No
II	3729858	3729920	63	1	SPBC13G1.02	SPBC13G1.02.1:exon:1-SPBC13G1.02.1:exon:2	int_3229	3	3	0	0	0	3	1	1	A	GUAACUAAUUA	12	3	Awan_Short	101	91	4.64613	4.548	8.5	15.3333	6.45847	6.39091	GTACGTACCAACGAAAAATAAGTCTATTAAACGCGTGAATATCAGTAACTAATTACTTTGCAG	AACUAAU	AACUAAU	12	3		NA	NA	NA	No	YES	No	NA	No	SPBC13G1.02_intron1	AACUAAU	10	2	YES	No
I	181750	182000	251	-1	SPAC13G6.05c	SPAC13G6.05c.1:exon:2-SPAC13G6.05c.1:exon:1	int_1148	28	14	14	0	0	16	3	2	A;A;A	UCUACUAACAC;UUCUACUAACA;GAAUUCUACUA	106;107;110	26;1;1	Awan_Short;Awan_Long	17	17	5.5987	5.45064	6	2	5.01291	4.9828	GTAAGTGATATGAATAAGGCTATGAGTTATATATATTATCGCAGTCTTCTTTTAGGATAAAAACAAAAGGCGTCTTTTTGAGGTTTTCTATGCTGCGATAACTCCATACTCTTCGACAATAAATAAGCTAAATAGAATTCTACTAACACAAATTACTTTGCTGGGAGCTCATACTGTCTTACTCACGGATAACTTTTTGTTAACCTAAGTAGGATGCGTTGCGAGTAACCAGAAAGTAATTGATTGAACAG	UACUAAC	UACUAAC	106	26	AUUCUAC	110	1	NA	No	YES	No	NA	No	SPAC13G6.05c_intron1	UACUAAC	104	9	YES	No
II	3788650	3788724	75	-1	SPBC31F10.17c	SPBC31F10.17c.1:exon:2-SPBC31F10.17c.1:exon:1	int_4215	3	3	0	0	0	3	2	1	A;A	UUGUACUAAUU;UGUACUAAUUG	13;12	2;1	Awan_Short	11	6	5.02931	4.19337	2.4	7	3.32681	3.07548	GTATGTAGCCGGGATGTATTTTCAAATACGTTGATGGGTTGTAGGAAATTCTTTGTTGTACTAATTGCTATGTAG	UACUAAU	UACUAAU	12	1		NA	NA	NA	No	YES	No	NA	No	SPBC31F10.17c_intron1	UACUAAU	10	1	YES	No
II	2548073	2548179	107	-1	SPBC29A10.06c	SPBC29A10.06c.1:exon:2-SPBC29A10.06c.1:exon:1	int_3883	1	1	0	0	0	1	1	1	A	AUUGUUAACUC	10	1	Awan_Short	33	24	2.21898	3.44939	17	25	4.73648	4.57984	GTAAGTTGTCTTTAAAATGAAACTAAAAGAAAATATAATTTATTATGATTTTTATTTATTCATTAATTTATTATCATTCCATGAATCTTGATTGTTAACTCTGTTAG	UGUUAAC	UGUUAAC	10	1		NA	NA	NA	No	YES	No	NA	No	NA	NA	0	0	No	No
I	5389254	5389322	69	1	SPAC3G6.05	SPAC3G6.05.1:exon:3-SPAC3G6.05.1:exon:4	int_1126	5	5	0	0	0	4	1	1	A	UUUGCUAAUUU	11	5	Awan_Short	47	29	2.58889	2.7287	48	15	6.07366	6.35637	GTATGTTGTTTCCAAGAGACATAAAGCATTTTTGCTCCTAGTTTTTTCGCCTTTGCTAATTTCAATTAG	UGCUAAU	UGCUAAU	11	5		NA	NA	NA	No	YES	No	NA	No	SPAC3G6.05_intron3	UGCUAAU	9	2	YES	No
I	2430460	2430543	84	-1	SPAC6B12.10c	SPAC6B12.10c.1:exon:2-SPAC6B12.10c.1:exon:1	int_1695	7	7	0	0	0	6	1	1	A	UUCUCUAACAA	15	7	Awan_Short	79	96	4.89006	5.15762	2.5	5.70588	5.63368	5.92549	GTAAGTGTGAATACTGAACAATCTTAACTATGGACTCGATTGAGCCTCTAAAATAATGAAAATTCTCTAACAATTTTCTTATAG	CUCUAAC	CUCUAAC	15	7		NA	NA	NA	No	YES	No	No	No	SPAC6B12.10c_intron1	CUCUAAC	13	4	YES	No
II	1756991	1757087	97	-1	SPBC1D7.01	SPBC1D7.01.1:exon:1-SPBC1D7.01.1:three_prime_UTR:1	int_3718	4	4	0	0	0	4	2	1	A;A	UAAACUAAUGA;GUAAACUAAUG	20;21	3;1	Awan_Short	12	13	5.16789	4.99812	0.448276	0.666667	5.89642	5.93799	GTACGTATTTCATCATTGAGAAGAGAATTATTTTGTTAGGAATTTCCCTCTTTTTAACTGTGTTACATGGTAAACTAATGAGCTTTGGGCATATTAG	AACUAAU	AACUAAU	20	3		NA	NA	NA	No	YES	No	NA	No	NA	NA	0	0	No	No
II	1444676	1444777	102	1	SPBP22H7.06	SPBP22H7.06.1:exon:2-SPBP22H7.06.1:exon:3	int_2662	3	3	0	0	0	3	2	1	A;A	AGUACUAACCA;AAAAAAAAAUG	27;39	2;1	Awan_Short	11	6	3.87299	4.60958	3	2.33333	4.19106	3.60841	GTATGATAATTTTGATTAATAAGAAAGAATAAAATAAAATCAAAAACTCCAAAATAAAAAAAAAATGAAGTACTAACCAATTTCTCTTTCTTGTTTTGACAG	UACUAAC	UACUAAC	27	2	AAAAAAA	39	1	NA	No	YES	No	NA	No	NA	NA	0	0	No	No
I	3942365	3942505	141	-1	SPAC2F3.18c	SPAC2F3.18c.1:exon:3-SPAC2F3.18c.1:exon:2	int_2051	28	5	23	0	0	22	2	2	A;A	UCAGCUAACUU;GUCAGCUAACU	15;16	25;3	Awan_Short;Awan_Long	176	77	4.61097	4.50503	17.7	6	6.49502	6.17733	GTATGTTTGATGAATATATTTTTCAGAAATAGTGAAAACTGCTTCAAGTATTCCATGAATTTGAGTGTAGCAGAAGGGTCTTCTATTCTTATTTATGGATTGGCTTAGTTATAAATAAGTCAGCTAACTTAAAATCTATAG	AGCUAAC	AGCUAAC	15	25		NA	NA	NA	No	YES	No	No	No	SPAC2F3.18c_intron2	AGCUAAC	13	2	YES	No
II	747910	747983	74	1	SPBC119.15	SPBC119.15.1:exon:1-SPBC119.15.1:exon:2	int_2482	3	3	0	0	0	2	1	1	A	AUUUCUAAUCA	18	3	Awan_Short	8	6	1.751	1.04281	4.5	7	5.86247	6.06585	GTATGAATTTTTTTATAATTGAAAAACCAATAAAGCACTCAACGCAGCAATTTCTAATCATTTTCATGTAATAG	UUCUAAU	UUCUAAU	18	3		NA	NA	NA	No	YES	No	NA	No	SPBC119.15_intron1	UUCUAAU	16	1	YES	No
II	234071	234166	96	-1	SPBC660.17c	SPBC660.17c.1:exon:2-SPBC660.17c.1:exon:1	int_3399	10	10	0	0	0	10	2	1	A;A	CUCUCUAACAU;ACUCUCUAACA	17;18	9;1	Awan_Short	16	18	3.54541	4.12673	2.42857	2.11111	4.7702	4.69725	GTATGCTAATTTTGTAAGGTTAAATATAGGAGTTTGAGTTTCTATGTATATGCTTTTTAATAACATAATGTACTCTCTAACATATCTATTTCGTAG	CUCUAAC	CUCUAAC	17	9		NA	NA	NA	No	YES	No	NA	No	SPBC660.17c_intron1	CUCUAAC	15	2	YES	No
I	4894515	4894619	105	-1	SPAC19B12.06c	SPAC19B12.06c.1:exon:3-SPAC19B12.06c.1:exon:2	int_2252	2	2	0	0	0	2	1	1	A	CAUGCUAAUGU	10	2	Awan_Short	117	103	4.0875	4.56776	59	26	7.04229	6.84826	GTATGTTTTTTGTCTCTCATAAATGATATTAAATTGTTTGAAAATTTATATCTAACTTTTTCACCTTAAAATTCTTTTCTTGGATATACATGCTAATGTTTTTAG	UGCUAAU	UGCUAAU	10	2		NA	NA	NA	No	YES	No	NA	No	NA	NA	0	0	No	No
I	2190510	2190696	187	-1	SPAC1783.02c	SPAC1783.02c.1:exon:2-SPAC1783.02c.1:exon:1	int_1641	9	4	5	0	0	6	2	2	A;A	UUCAUUAACCC;UUAAUGCAGAU	10;20	8;1	Awan_Short;Awan_Long	22	23	4.94753	4.80691	7.66667	8	4.55358	4.40216	GTAAGAATATGCAATACTTTAAATGCTTGATTGTTCACATAAATGTTGTTTAAATAGAACGCAAAAAAAAATAAAAGCAAAAAATAGAAGCCAATTATTTTGTATTATGATTCTTGACTTTAAGATCGAGTGTTTGTCAATTTCTCTTAACAAAATGACTTTAATGCAGATTCATTAACCCTTTTAG	CAUUAAC	CAUUAAC	10	8	AAUGCAG	20	1	NA	No	YES	No	YES	No	SPAC1783.02c_intron1	CAUUAAC	8	1	YES	No
III	898633	898742	110	-1	SPCC16A11.16c	SPCC16A11.16c.1:exon:3-SPCC16A11.16c.1:exon:2	int_5070	1	1	0	0	0	1	1	1	A	UUUACUAACAU	13	1	Awan_Short	46	24	2.91605	2.4709	9.4	6.25	5.75301	5.57419	GTATGAAGACAATTTAAATCAATTGCAAAGTATACCTATTTATATATATAAATTTACTTTTGCGTTTTTTTTTTTTTAATTTGGTTTATGTTTACTAACATATAATGAAG	UACUAAC	UACUAAC	13	1		NA	NA	NA	No	YES	No	NA	No	NA	NA	0	0	No	No
I	1339376	1339580	205	-1	SPAC6F12.13c	SPAC6F12.13c.1:five_prime_UTR:1-SPAC6F12.13c.1:exon:2	int_1424	5	2	3	0	0	5	2	2	A;A	AUGACUAACUG;CAUGACUAACU	16;17	4;1	Awan_Short;Awan_Long	93	80	8.76948	8.40145	23.5	40.5	6.16603	6.14435	GTATGTGAGTGTAGAGTTACAATATTTTCCAATGTCAATGAATGTTTCTAAAACATTGATCTCTTAAAAAAAAAGTGTTATACTTTGCGCTGTTTTTATTGCATCGGCATCGTGTCATATCATCTGTATTTTAATTAGATCACATCAATTTTTTATTTCTTTTTGGGAACCTCGAATAACACATGACTAACTGCTGTTTTTGTAG	GACUAAC	GACUAAC	16	4		NA	NA	NA	No	YES	No	NA	No	SPAC6F12.13c_intron2	GACUAAC	14	2	YES	No
II	1362339	1362460	122	-1	SPBC8D2.02c	SPBC8D2.02c.1:exon:2-SPBC8D2.02c.1:exon:1	int_3649	7	7	0	0	0	4	1	1	A	UGCUUUAACAU	12	7	Awan_Short	35	26	2.76668	2.73656	1.8	2.07692	4.3639	4.22508	GTATGTTTCCAAATTACTGAAGCAGAAGTATAGATTCTATTTCATATATGTACACTACTTAAGTAAACATTGCTTCCCGACCTTTCCTTTTCACTAAACATCCTGCTTTAACATTTGAATAG	CUUUAAC	CUUUAAC	12	7		NA	NA	NA	No	YES	No	No	No	SPBC8D2.02c_intron1	CUUUAAC	10	1	YES	No
I	3259054	3259183	130	-1	SPAC6G9.07c	SPAC6G9.07c.1:exon:3-SPAC6G9.07c.1:exon:2	int_1876	1	1	0	0	0	1	1	1	A	UUUACUGAUGC	18	1	Awan_Short	46	32	6.53303	6.41972	6.71429	2.75	6.99786	7.21871	GTATGTCTTAGGCATCCGATGTTTCCGATTCGAACTGGTACATTCACTGATCTTTCGATTTGGAATAACGGAGTTTTGAAAGTCATTCTCATTATTTGGATTTTTTTTACTGATGCATTTATGAAATTAG	UACUGAU	UACUGAU	18	1		NA	NA	NA	No	YES	No	NA	No	NA	NA	0	0	No	No
III	1268173	1268243	71	-1	SPCC23B6.02c	SPCC23B6.02c.1:exon:2-SPCC23B6.02c.1:exon:1	int_5136	3	3	0	0	0	3	1	1	A	UUUACUAACGG	17	3	Awan_Short	16	7	2.68517	1.83948	2.42857	8	4.818	4.93033	GTATGAAGGTTTTTATTAATTTTCGATTTTTTTTGATCTAGGGAAGGTTTACTAACGGATCACCAACTTAG	UACUAAC	UACUAAC	17	3		NA	NA	NA	No	YES	No	NA	No	NA	NA	0	0	No	No
II	380561	380623	63	1	SPBC106.04	SPBC106.04.1:exon:1-SPBC106.04.1:exon:2	int_2405	5	5	0	0	0	5	1	1	A	UUAACUAACCA	12	5	Awan_Short	128	88	4.3524	4.73441	32.25	29.6667	6.73072	6.46408	GTAAGTATTTAAGTGAAAACCCCCCAATTCGATATATTACGTGTTTAACTAACCATAACCTAG	AACUAAC	AACUAAC	12	5		NA	NA	NA	No	YES	No	NA	No	NA	NA	0	0	No	No
I	2672784	2672977	194	-1	SPAC4F8.03	SPAC4F8.03.1:exon:2-SPAC4F8.03.1:exon:1	int_1746	13	6	7	0	0	10	2	2	A;A	AUAGCUAACCA;AAAUUAUAACA	11;102	11;2	Awan_Short;Awan_Long	75	59	8.21228	8.34932	19	30	5.31302	4.95458	GTATGCATGATTTCATTAAATTAAGCTACTGTAATTAGTGAGAGTCAGCCTTTGCTACAGATAAATATTCTTTAAGATCAGCAGAAAATTATAACAAGCTATCTTTTTGAATTCACGTGTCTTGTCGACTGGTGTCAACAACTCAATAACTCGTACAATTTTTTTTGATCAAAACCATAGCTAACCAAGTTTAG	AGCUAAC	AGCUAAC	11	11	AUUAUAA	102	2	NA	No	YES	No	NA	No	SPAC4F8.03_intron1	AGCUAAC	9	2	YES	No
I	733252	733368	117	1	SPAC22G7.04	SPAC22G7.04.1:exon:3-SPAC22G7.04.1:exon:4	int_158	3	3	0	0	0	3	1	1	A	AGUACUAAUCU	8	3	Awan_Short	31	21	3.86267	4.18925	32	5.5	4.34933	4.43334	GTAAGTATATCATGATATGCATTCTTGATCTAGTAGTTCCGTACCTTGTGTTCAGCGATCTATGATCATTTTGTATTCATGCTTTCTATGTTCAAAACATGCAGTACTAATCTCTAG	UACUAAU	UACUAAU	8	3		NA	NA	NA	No	YES	No	NA	No	SPAC22G7.04_intron3	UACUAAU	6	1	YES	No
III	1059258	1059426	169	-1	SPCC1259.15c	SPCC1259.15c.1:exon:4-SPCC1259.15c.1:exon:3	int_5109	28	19	9	0	0	13	2	2	A;A	ACGACUAACGU;UACGACUAACG	15;16	26;2	Awan_Short;Awan_Long	15	9	7.36907	7.39828	4	5	4.47502	4.02987	GTATGACTTTTATTTTGAAAGCTTAATATTTAAAGTATATGAATAATGCTTGGTGTGCTTACTTGTAGCTGCACTTTAATGGAAAATTAATACACATCTTTGTCATTACATTTTCATAACTGTCTACTCTTCTTTCTTCTTTTTCATACGACTAACGTAACGAAAATAG	GACUAAC	GACUAAC	15	26		NA	NA	NA	No	YES	No	No	No	SPCC1259.15c_intron3	GACUAAC	13	7	YES	No
II	4030611	4030699	89	1	SPBC215.04	SPBC215.04.1:exon:1-SPBC215.04.1:exon:2	int_3292	4	4	0	0	0	3	1	1	A	GUUGCUAACUG	12	4	Awan_Short	3	7	2.35919	3.27903	2	4	2.72013	2.93795	GTAAGTGTTTTTACAGCAAATTTCATGACGTGAAACAAAAAATGCTTGATTTGATCTCAAAGTTTGAAAAGTTGCTAACTGAACTTTAG	UGCUAAC	UGCUAAC	12	4		NA	NA	NA	No	YES	No	NA	No	NA	NA	0	0	No	No
III	1755559	1755635	77	1	SPCC1450.12	SPCC1450.12.1:exon:3-SPCC1450.12.1:exon:4	int_4716	2	2	0	0	0	2	1	1	A	GUGACUAACAC	11	2	Awan_Short	8	9	1.1087	0.985482	4.5	10	5.6722	5.66446	GTATGTAATTGTGAGACAAGGATAACAAAAAAATAATTATTGCGTTTTTATTTTTTTAAGTGACTAACACTTTTTAG	GACUAAC	GACUAAC	11	2		NA	NA	NA	No	YES	No	NA	No	SPCC1450.12_intron3	GACUAAC	9	1	YES	No
II	4368449	4368634	186	1	SPBC1539.04	SPBC1539.04.1:exon:1-SPBC1539.04.1:exon:2	int_3349	5	5	0	0	0	5	1	1	A	AUUACUAACCG	14	5	Awan_Short	80	46	6.49454	6.78992	81	47	5.63409	5.4166	GTAAATATATCTATCATGTGTAAATCAGATAATAAATGTTGATTATAAGAAAAGTTTCTTATTTAGTTCCATAACGTAACTGTAATCTATTACTAAAACATAGACTAATTTGTCAGCATTATTTTATTTTGATTCAGTGTCATATTGTCTTCACTCTTTTAATACATTACTAACCGTTTATTATAG	UACUAAC	UACUAAC	14	5		NA	NA	NA	No	YES	No	NA	No	SPBC1539.04_intron1	UACUAAC	12	2	YES	No
III	1618714	1618843	130	-1	SPCC777.17c	SPCC777.17c.1:exon:3-SPCC777.17c.1:exon:2	int_5181	10	8	2	0	0	8	2	2	A;A	ACUACUAACUU;AACUACUAACU	12;13	8;2	Awan_Short;Awan_Long	25	18	5.3304	5.49042	26	19	4.67654	4.37691	GTATGCTAAATTTTTCATAATTATAATGTTCTTCATTTCAAACCTATAATAGGGAGGTAGTGGTTACATCCTTTTATTATAAGAAATGCATTCTTTTAGCCGTCGTAGGAAACTACTAACTTTACAAAAG	UACUAAC	UACUAAC	12	8		NA	NA	NA	No	YES	No	No	No	SPCC777.17c_intron2	UACUAAC	10	1	YES	No
I	2016699	2016840	142	1	SPAC17H9.07	SPAC17H9.07.1:exon:2-SPAC17H9.07.1:exon:3	int_425	11	3	8	0	0	10	2	2	A;A	UUCGCUAACAG;UUUCGCUAACA	17;18	10;1	Awan_Short;Awan_Long	23	18	5.16825	5.11746	12	9.5	7.35445	7.16891	GTATGTATTATTAGTATATCAATTGTTTTTGCATTGTTATAAAAAGAAGCGCTTGGAAGGAAGATGTTTTCCTTTAAAAGTAGTTATTAATGTAACTATGCTCTTCTAATTTTTACGTTTCGCTAACAGTCATGTTATATAG	CGCUAAC	CGCUAAC	17	10		NA	NA	NA	No	YES	No	No	No	NA	NA	0	0	No	No
II	343628	343770	143	-1	SPBC1271.12	SPBC1271.12.1:exon:4-SPBC1271.12.1:exon:3	int_3416	4	3	1	0	0	3	1	2	A	GUUUCUAACCA	19	4	Awan_Short;Awan_Long	198	166	7.5863	7.88681	39.8	55.6667	7.60309	7.59714	GTAAGGATATACCATTAATGATAGTCGGAAGGATTTCGTGAAACAGTAATTCGGGTCTTTATCGCTCGTTTGTTTGCACTTTACTGCATCCATCCCCTTATTTGTCATATCTTTTTAGTTTCTAACCAAAGTTTTTTTGTTAG	UUCUAAC	UUCUAAC	19	4		NA	NA	NA	No	YES	No	No	No	SPBC1271.12_intron4	UUCUAAC	17	1	YES	No
I	753080	753155	76	-1	SPAC22G7.09c	SPAC22G7.09c.1:exon:2-SPAC22G7.09c.1:exon:1	int_1279	3	3	0	0	0	3	1	1	A	UAUAUUAACCU	10	3	Awan_Short	37	25	2.71252	3.11981	19	13	6.14276	6.03589	GTATGTTTCTTTAGGTGAACAAGTCTTCAAGTTTACTTTTCGAATTTTGTGCTTATTCATATATTAACCTTTTCAG	UAUUAAC	UAUUAAC	10	3		NA	NA	NA	No	YES	No	NA	No	SPAC22G7.09c_intron1	UAUUAAC	8	1	YES	No
I	3403050	3403135	86	-1	SPAC959.09c	SPAC959.09c.1:exon:5-SPAC959.09c.1:exon:4	int_1900	19	19	0	0	0	14	1	1	A	CUUAUUAACUG	14	19	Awan_Short	9	7	2.27115	2.04839	10	4	3.63601	3.46604	GTAGGTTTCATTGGAAAATTTTTAACAATTATATTAACAGCTTTTTAATGCATATTATCTAAGCACTTATTAACTGATTTACGCAG	AACUGAU	UAUUAAC	14	19		NA	NA	NA	No	No	No	NA	No	SPAC959.09c_intron4	UAUUAAC	12	5	YES	No
I	623594	623751	158	1	SPAC1F3.05	SPAC1F3.05.1:exon:3-SPAC1F3.05.1:exon:4	int_102	12	7	5	0	0	10	1	2	A	UUGGUUAACAU	15	12	Awan_Short;Awan_Long	4	3	5.08293	5.2215	2.5	4	2.44949	1.41938	GTAAGTATATTCCTCTAGCCTTTGAGGAGAATGGTTGGTACCCATCAGTTTACGAATCTCTCCTTTATGTGCATGGTCAAGCGTTTATTGTTCACCATGGCGAGTCCAGAGTACTTTACGCTTTCTTGTGAGATATTTGGTTAACATAAGTGCTTTAG	GGUUAAC	GGUUAAC	15	12		NA	NA	NA	No	YES	No	NA	No	SPAC1F3.05_intron3	GGUUAAC	13	2	YES	No
II	2810950	2811071	122	-1	SPBC32F12.12c	SPBC32F12.12c.1:exon:4-SPBC32F12.12c.1:exon:3	int_3958	16	10	6	0	0	10	2	2	A;A	UUUAUUAACUC;GUUUAUUAACU	10;11	15;1	Awan_Short;Awan_Long	50	40	3.39894	3.49145	6.375	41	5.29302	5.25711	GTAAGTTGTTATAGTTTCTTTTAAGAAAGGCACACAGGGGAAAAAGCATGCCTCTGGATATTTTTAATTCCTTTGTTGCCTTCCTGCTGTCTTTTACATACAGTGTTTATTAACTCTTTTAG	UAUUAAC	UAUUAAC	10	15		NA	NA	NA	No	YES	No	NA	No	NA	NA	0	0	No	No
I	2852039	2852174	136	1	SPAC3F10.17	SPAC3F10.17.1:exon:1-SPAC3F10.17.1:exon:2	int_615	8	3	5	0	0	7	3	2	A;A;A	UUGACUAACGA;GUUGACUAACG;UUGGUUGACUA	16;17;20	6;1;1	Awan_Short;Awan_Long	6	2	6.51684	6.799	3.5	3	2.3094	1.77114	GTAAGAAATGAATAAAAAAATAAATTTTTGCCTGTGCGATTGTTGGTTGAACAGAAAATTGTATTTTAGCAATCTATTAATCTTGATTTATTTGTCAAATAGGGAATTGTTGGTTGACTAACGAAAATATGAATAG	GACUAAC	GACUAAC	16	6	GGUUGAC	20	1	NA	No	YES	No	No	No	NA	NA	0	0	No	No
I	4402144	4402218	75	1	SPAC29E6.01	SPAC29E6.01.1:exon:1-SPAC29E6.01.1:exon:2	int_876	6	6	0	0	0	5	2	1	A;A	UUUACUAAUAU;UUUUACUAAUA	11;12	5;1	Awan_Short	5	2	2.84711	2.43848	6	3	4.2924	4.22271	GTATGTTTTTTTTGAAGCTCACGGCTTTACTTCTTTTTTAATTTGTACTCTTTTCATTTTACTAATATAAAGAAG	UACUAAU	UACUAAU	11	5		NA	NA	NA	No	YES	No	NA	No	SPAC29E6.01_intron1	UACUAAU	9	1	YES	No
I	2348323	2348424	102	1	SPAC17G8.15	SPAC17G8.15.1:exon:2-SPAC17G8.15.1:exon:3	int_504	2	2	0	0	0	2	2	1	A;A	CUUACUAACCA;CAUACUUACUA	9;13	1;1	Awan_Short	4	3	4.6338	4.85285	5	4	3.71252	3.64176	GTAAGCTAATATTGAATAAACTAGATTTATTATCTTTTCAGCAAAGGCGTAAATCGATTGCACTTTATTTTTTAAAATGGAACATACTTACTAACCATTTAG	UACUAAC	UACUUAC	13	1	UACUAAC	9	1	NA	YES	No	No	NA	No	NA	NA	0	0	No	No
I	903469	903545	77	1	SPAC1687.01	SPAC1687.01.1:exon:3-SPAC1687.01.1:exon:4	int_192	1	1	0	0	0	1	1	1	A	CUCAACUAACG	12	1	Awan_Short	52	29	4.99134	4.82678	13.25	10	5.60055	5.89237	GTAAGTGATTGAATGAAATATTAACTTATAGATTTGATTAATAATATTTTGGGACAAACTCAACTAACGAATTCAAG	AACUAAC	CAACUAA	12	1		NA	NA	NA	No	No	No	NA	No	NA	NA	0	0	No	No
I	2989508	2989564	57	1	SPAC31G5.01	SPAC31G5.01.1:exon:1-SPAC31G5.01.1:exon:2	int_624	1	1	0	0	0	1	1	1	A	GAUACUAAUUC	10	1	Awan_Short	5	4	1.5426	2.64177	3	1.66667	3.21502	3.29384	GTATGTAATTATTCGAGTGTTGGTTGTATTTGTGGCTTTCGATACTAATTCATACAG	UACUAAU	UACUAAU	10	1		NA	NA	NA	No	YES	No	No	No	NA	NA	0	0	No	No
I	5292939	5293022	84	1	SPAC11E3.06	SPAC11E3.06.1:exon:1-SPAC11E3.06.1:exon:2	int_1091	8	8	0	0	0	7	2	1	A;A	UUUUCUAAUAA;UUUUUCUAAUA	11;12	6;2	Awan_Short	1	1	-1.0168	-0.724995	2	2	0.65005	-0.195632	GTAAAAATCCCTGGCAATTGTGAGATTTCAAGTTAGAGCGAAATTTAATTTTTAGTAATGTATTGTTTTTCTAATAATTATTAG	UUCUAAU	UUCUAAU	11	6		NA	NA	NA	No	YES	No	No	No	SPAC11E3.06_intron1	UUCUAAU	9	4	YES	No
I	2564307	2564470	164	1	SPAC4A8.10	SPAC4A8.10.1:exon:1-SPAC4A8.10.1:exon:2	int_543	16	10	6	0	0	11	2	2	A;A	UGUUCUAACAU;UUGUUCUAACA	17;18	14;2	Awan_Short;Awan_Long	6	6	3.85082	3.73601	3.5	7	1.95402	2.68641	GTAAGTTACTTTAAACAAAATTTACCACTCCTTTAAATTGTATTTGCAAGTTGATATTATCAGCTCGTTATTTAAAGTTTCGATTTGTTATGCTTGTTTCGATGCAAAAATTTTGGGATGGCATATAAATATTTAATACTTGTTCTAACATTGGCATGGTACAG	UUCUAAC	UUCUAAC	17	14		NA	NA	NA	No	YES	No	NA	No	SPAC4A8.10_intron2	UUCUAAC	15	1	YES	No
II	4074119	4074237	119	1	SPBC1347.07	SPBC1347.07.1:exon:3-SPBC1347.07.1:exon:4	int_3300	1	1	0	0	0	1	1	1	A	UCAUACUAACU	13	1	Awan_Short	9	3	5.24885	4.85994	2.5	2	3.70411	3.7646	GTAACTTTTAATTGTGAACATTGAAACATCGGCTTTTAACTTGAGATGTTTCAAGAGAAACAAATGCATGGTTTCGAAGTTGAGCGTTTATTAAGGCTGTCATACTAACTAAGGCGTAG	UACUAAC	AUACUAA	13	1		NA	NA	NA	No	No	No	No	No	NA	NA	0	0	No	No
III	2125449	2125542	94	-1	SPCC126.05c	SPCC126.05c.1:exon:2-SPCC126.05c.1:exon:1	int_5291	2	2	0	0	0	2	1	1	A	AUUGCUAACAU	11	2	Awan_Short	44	28	2.99082	2.43464	11.25	29	5.54054	4.73838	GTACAGAATTAAAAAATGAAAATGAATTATCTAGGGATATTAAATATAAATAAAAAAATTACCTTTGATGTACATGATTGCTAACATATCTTAG	UGCUAAC	UGCUAAC	11	2		NA	NA	NA	No	YES	No	No	No	NA	NA	0	0	No	No
III	1816210	1816396	187	1	SPCC285.11	SPCC285.11.1:exon:1-SPCC285.11.1:exon:2	int_4732	37	1	36	0	0	22	2	2	A;A	UUUGCUAACUG;UUUUGCUAACU	16;17	28;9	Awan_Long;Awan_Short	36	33	10.4988	10.1073	3.08333	5.66667	6.13581	5.79854	GTATGTGACACGGCAAGCATTCATTTTCAGTATTCGATAGTGATCAATTGCTTTGATTGAAAAATTCCAAGAAAGTTGTTATTTGCAACTGAACATTCATGGAATCCTCTGGTTGTCGTTTATTTTTCTAATCGAATTTTCGGTGAATGTTGGGACTGAGCCATTTTGCTAACTGTTTTATGATTAG	UGCUAAC	UGCUAAC	16	28		NA	NA	NA	No	YES	No	NA	No	NA	NA	0	0	No	No
I	3444097	3444281	185	1	SPAC3A11.12c	SPAC3A11.12c.1:exon:1-SPAC3A11.12c.1:exon:2	int_712	10	4	6	0	0	8	3	2	A;A;A	UUCACUAACAU;UUCUAGAAGUA;CUUUUCUAGAA	13;27;30	5;4;1	Awan_Short;Awan_Long	143	77	8.06448	8.25096	36	19.5	9.12364	8.85913	GTAAGTCATTCAATGAACCTCTAGATAAGTGTTGGGAAAACCGAAATCTTTTTCTTTTATAATTTCTTTATTCACAGAGAACGAAGATCTGATAATGTTTTGCCCTCATCCTTAAATGAAGGTGGAAAGATGAATGCGGTCGAATGTTCTTTTCTAGAAGTAAAATTCACTAACATAGATTGTAG	CACUAAC	CACUAAC	13	5	CUAGAAG	27	4	NA	No	YES	No	YES	No	NA	NA	0	0	No	No
I	980775	980845	71	-1	SPAC222.16c	SPAC222.16c.1:exon:3-SPAC222.16c.1:exon:2	int_1347	1	1	0	0	0	1	1	1	A	UAAGCUAACUA	10	1	Awan_Short	6	3	2.0331	1.83948	7	4	3.13156	1.17545	GTAGGTTAATACTCGAGATGCCCCATTCTCGACGGCTATTTTTGCTTAATGAAATAAGCTAACTAAAAAAG	AGCUAAC	AGCUAAC	10	1		NA	NA	NA	No	YES	No	NA	No	SPAC222.16c_intron2	AGCUAAC	8	1	YES	No
II	3108432	3108507	76	-1	SPBC1778.06c	SPBC1778.06c.1:exon:2-SPBC1778.06c.1:exon:1	int_4024	1	1	0	0	0	1	1	1	A	AUUACUAAUGC	10	1	Awan_Short	96	79	4.37549	2.41937	48.5	80	7.57493	7.35027	GTAAGTAATGTTTTCCGTAATTTTCACGATATGTGTCTCTATATCGCTTCATCAATTGGATTACTAATGCATATAG	UACUAAU	UACUAAU	10	1		NA	NA	NA	No	YES	No	No	No	NA	NA	0	0	No	No
I	1353237	1353423	187	-1	SPAC19E9.01c	SPAC19E9.01c.1:exon:2-SPAC19E9.01c.1:exon:1	int_1429	13	2	11	0	0	8	1	2	A	UUUACUAAUUU	15	13	Awan_Short;Awan_Long	47	30	9.47695	9.47465	3.69231	3.44444	6.18936	5.98673	GTAAGTAATTTCTTTGAAGAGTTTAAGGGACATTTGAAGACGGAGGATTAAAAAATTGTTTAGTATAATTGCTTTTTTACCTAATATCTATCTATATCCAAATTTGTTAGAGCTTCAGCCTAATCCCTATGAATTTTTAAATATTAGACATAAACTCTTAGAACCTTTACTAATTTTCTCTAAATAG	UACUAAU	UACUAAU	15	13		NA	NA	NA	No	YES	No	NA	No	NA	NA	0	0	No	No
III	506493	506653	161	-1	SPCC970.05	SPCC970.05.1:exon:2-SPCC970.05.1:exon:1	int_4959	10	1	9	0	0	9	6	2	A;A;A;A;A;A	UAUUCUAACAA;UUAUUCUAACA;UAAUGGGAUAU;UAUUUUGAGAC;AAAGCUUAGUA;CGUAGAGAGCU	12;13;48;77;107;120	4;2;1;1;1;1	Awan_Long;Awan_Short	831	797	12.1695	12.1622	55.4667	57	10.4831	10.3607	GTATGTAAAATTTTGTTCTGTTACTGTACATGCTCGTAGAGAGCTTCAAAGCTTAGTATACTCAAATTCACTTGTGGTATTTTGAGACTCGGAGCTATGAATACTGTAATGGGATATTATGTTTTGTTATTGAATTTATTCTTATTCTAACAACTTTTTAG	UUCUAAC	UUCUAAC	12	4	AUGGGAU	48	1	NA	No	YES	No	YES	No	NA	NA	0	0	No	No
II	4342922	4343116	195	-1	SPBC16C6.07c	SPBC16C6.07c.1:exon:3-SPBC16C6.07c.1:exon:2	int_4336	15	3	12	0	0	13	2	2	A;A	AUUGCUAACUA;UAUUGCUAACU	11;12	13;2	Awan_Short;Awan_Long	274	169	9.0645	9.29718	91.6667	170	7.54159	7.2665	GTATGTTTTATGTCGAGAAAGCAGTTGCACGATGTTGTCTGATGAATGGCGTTCCTGTAGTTCATATAGCTGATATGAACTACAAGATATGACATTCATGAACAGGATGTATTTTTACAATTTTTTATCATGTAAAATGCTCTCATTTTATATGAAATTTGCTTAACCCGTTGTTCTATTGCTAACTAGCCCTAG	UGCUAAC	UGCUAAC	11	13		NA	NA	NA	No	YES	No	NA	No	NA	NA	0	0	No	No
II	1470956	1471075	120	1	SPBC32H8.10	SPBC32H8.10.1:exon:2-SPBC32H8.10.1:exon:3	int_2672	2	2	0	0	0	2	1	1	A	AAUACUAAAGC	16	2	Awan_Short	2	2	5.55606	5.99881	0.5	1.5	4.99521	5.30975	GTAAGTAGATGTTTGTTTAGATTCTTGTTCATTTTGACAGAATGACTTGGGACGCATCGACTTGATTGCGTTAATTGTTTTAATTAATTCATGAATAAATACTAAAGCATTACATTTTAG	AAUUAAU	UACUAAA	16	2		NA	NA	NA	No	No	No	No	No	NA	NA	0	0	No	No
III	2388786	2388860	75	-1	SPCC1827.07c	SPCC1827.07c.1:exon:8-SPCC1827.07c.1:exon:7	int_5349	2	2	0	0	0	2	1	1	A	CAUACUAAUUU	12	2	Awan_Short	4	1	0.731637	1.76041	1.66667	0.666667	1.40832	1.14374	GTAAGTTCGCTGGTTTGTGTTTACTTTTATTTATTTTTATTTGATTCAAATCGTCGCATACTAATTTCATTATAG	UACUAAU	UACUAAU	12	2		NA	NA	NA	No	YES	No	NA	No	SPCC1827.07c_intron7	UACUAAU	10	1	YES	No
II	499398	499555	158	1	SPBC1685.03	SPBC1685.03.1:exon:1-SPBC1685.03.1:exon:2	int_2430	1	1	0	0	0	1	1	1	A	UAUACUAACGU	16	1	Awan_Short	45	21	6.17499	6.45098	23	22	3.78386	3.60619	GTAAGAAAAATAATTTGCTGCGATGCCTGATTTGTTTGTTCTCTGGCAATACTTGCTTATGACTTTGAATGGACGACACGTCGATTCGGCAAAGCGCTATTTAAACGTTTTCAACTTTTAACGATTCAAATCTGTTATACTAACGTGTAAATTTACAG	UACUAAC	UACUAAC	16	1		NA	NA	NA	No	YES	No	NA	No	NA	NA	0	0	No	No
III	1641181	1641242	62	1	SPCC663.04	SPCC663.04.1:exon:1-SPCC663.04.1:three_prime_UTR:2	int_4709	2	1	1	0	0	2	1	2	A	UUUUCUAACUG	10	2	Awan_Short;Awan_Long	653	627	10.5415	10.6774	0.773964	0.805128	9.54838	9.73168	GTATGTCGACAAAATCAACCGACGCCTTTGCTTGTGGAGTAACTGTTTTCTAACTGAGATAG	UUCUAAC	UUCUAAC	10	2		NA	NA	NA	No	YES	No	No	No	SPCC663.04_intron1	UUCUAAC	8	1	YES	No
I	1058515	1058622	108	1	SPAC23C4.17	SPAC23C4.17.1:exon:2-SPAC23C4.17.1:exon:3	int_250	1	1	0	0	0	1	1	1	A	UCAGCUAACAU	8	1	Awan_Short	11	0	5.99564	5.91241	2	0.25	4.25519	3.02344	GTAAGTGTACAAAGGTGCTTTTTTACGGGGTTTAAAGCTTTATTGGGATATTTTTAAGAAATACATTGAAAAGATCATTATTGTAGGAAATAGTCAGCTAACATGCAG	AGCUAAC	AGCUAAC	8	1		NA	NA	NA	No	YES	No	NA	No	NA	NA	0	0	No	No
II	4208500	4208565	66	1	SPBC342.04	SPBC342.04.1:exon:2-SPBC342.04.1:exon:3	int_3320	4	4	0	0	0	3	2	1	A;A	CGAUACUAACC;GAUACUAACCA	12;11	3;1	Awan_Short	245	167	4.08598	4.43026	10.6957	8.84211	7.28003	7.14264	GTAAGTATCACTTTCAATACCACCTGTAACACATTAAAAGTTCTAGTCGATACTAACCAAGTTTAG	UACUAAC	UACUAAC	11	1		NA	NA	NA	No	YES	No	NA	No	NA	NA	0	0	No	No
II	1893429	1893514	86	1	SPBP16F5.02	SPBP16F5.02.1:exon:1-SPBP16F5.02.1:exon:2	int_2761	1	1	0	0	0	1	1	1	A	UUUACUCACAA	12	1	Awan_Short	9	9	5.50381	5.45049	1	1.42857	3.89744	3.87375	GTATGTTTAGACATGGTCGGATTTCCTTCAATTACTTGGAAACTGTACTCAATATAAACATTCCGACTTTACTCACAAAATTTTAG	UACUCAC	UACUCAC	12	1		NA	NA	NA	No	YES	No	No	No	NA	NA	0	0	No	No
II	2450782	2450849	68	-1	SPBC12C2.11	SPBC12C2.11.1:exon:2-SPBC12C2.11.1:exon:1	int_3871	3	3	0	0	0	3	1	1	A	UAUGCUAAUAC	12	3	Awan_Short	135	76	4.19491	4.1648	45.3333	19.25	7.70955	7.31845	GTAAGCTATTTGTTTGTTTTATATCTATTTAAATATTTGATCGTCCTTTTATGCTAATACGAAGCTAG	UGCUAAU	UGCUAAU	12	3		NA	NA	NA	No	YES	No	NA	No	NA	NA	0	0	No	No
I	3530471	3530614	144	1	SPAC16E8.16	SPAC16E8.16.1:exon:1-SPAC16E8.16.1:exon:2	int_733	7	5	2	0	0	6	1	2	A	UUGGCUAACCA	12	7	Awan_Short;Awan_Long	121	133	7.47469	7.43989	1.71831	2.5283	6.74444	6.62641	GTGCGTTCATATTGTAGTATAGTTTCAGCTCCTAGTCTAGTGTTGCTGTTTTGTAGTTTATATGATCGTAGAAAGCTAGTGATTAGGGGCTTTTAATATGAAATGATTTGTTTATGTGTAATACATTGGCTAACCACATATCAG	GGCUAAC	GGCUAAC	12	7		NA	NA	NA	No	YES	No	NA	No	SPAC16E8.16_intron1	GGCUAAC	10	3	YES	No
II	1432231	1432359	129	-1	SPBC691.05c	SPBC691.05c.1:exon:2-SPBC691.05c.1:exon:1	int_3669	5	2	3	0	0	4	1	2	A	UGUACUUACUG	14	5	Awan_Short;Awan_Long	10	7	3.88782	4.04839	3.66667	8	4.17524	3.87144	GTAAGTCACTTTGGGGAGAGATTTGGCTCCAGCTTTCTTGAATACCTGTAAATTTCTATCATCCAAATAGAATCTTATGAATTTGTATTTAAAAAATTATACATTCTTTGTACTTACTGTGATATTTAG	CUGUGAU	UACUUAC	14	5		NA	NA	NA	No	No	No	No	YES	NA	NA	0	0	No	No
I	3272266	3272416	151	-1	SPAC6G9.13c	SPAC6G9.13c.1:exon:2-SPAC6G9.13c.1:exon:1	int_1878	1	1	0	0	0	1	1	1	A	UUUACUAAUGC	17	1	Awan_Short	3	1	1.83752	1.4289	4	1	4.17334	3.54501	GTAAGTTCTGTCTATCAGTATAATGAAACATAATTTCAAAACCTCCCATTACCCATTTTTGACCTAGTTGATTTAATTTAAAAAAAAAAATTTATTAGAGAACGAAAAAAAAATCCGAAGCTATATATTTACTAATGCTAAATGAGTTTAG	UACUAAU	UACUAAU	17	1		NA	NA	NA	No	YES	No	NA	No	SPAC6G9.13c_intron1	UACUAAU	15	1	YES	No
I	4745012	4745139	128	1	SPAC458.07	SPAC458.07.1:exon:3-SPAC458.07.1:exon:4	int_980	5	3	2	0	0	5	1	2	A	UUCACUAACUU	9	5	Awan_Short;Awan_Long	8	8	5.01934	5.42219	1.28571	1.5	3.652	3.51755	GTAAGTTCCTTTTTTAATTGGGCCTTTTTTCATAAAAGGTTTACCATATTGTTTCCTTCTTTTTGCTTAGTGTTTTACCCACTACTTTTACGAATCTCTTATTATCGTCACTTTCACTAACTTAGCAG	CACUAAC	CACUAAC	9	5		NA	NA	NA	No	YES	No	NA	No	SPAC458.07_intron3	CACUAAC	7	2	YES	No
II	4074304	4074365	62	1	SPBC1347.07	SPBC1347.07.1:exon:4-SPBC1347.07.1:exon:5	int_3301	1	1	0	0	0	1	1	1	A	UAUACUAAUAA	8	1	Awan_Short	12	17	2.88072	2.7131	2.6	9	3.72341	4.43026	GTATCTTTTCTTGCTTTTAGTTCATTCACGGATGTCAATTTTCTAATTATACTAATAAACAG	UACUAAU	UACUAAU	8	1		NA	NA	NA	No	YES	No	No	No	NA	NA	0	0	No	No
I	1050089	1050174	86	1	SPAC23C4.12	SPAC23C4.12.1:exon:2-SPAC23C4.12.1:exon:3	int_241	2	2	0	0	0	2	1	1	A	UUGACUAACUA	11	2	Awan_Short	11	19	5.45701	5.6673	6	20	5.15641	4.86094	GTAAGTTTTGAAAAGAAAATGATAAGGTGATACGTTAGTTTAACCTTAACAAATGATTGAAAATTCGATTGACTAACTATTATTAG	GACUAAC	GACUAAC	11	2		NA	NA	NA	No	YES	No	No	No	NA	NA	0	0	No	No
I	4409097	4409170	74	-1	SPAC29E6.03c	SPAC29E6.03c.1:exon:2-SPAC29E6.03c.1:exon:1	int_2144	2	2	0	0	0	2	1	1	A	GGGACUAACAA	10	2	Awan_Short	0	0	3.33596	3.70577	0.125	0.0833333	5.30378	5.07445	GTATGATTTTTTTAAATACTAGTTTGAGGTTGCTTTTTTATTTAATTTTGTTCGATTGGGACTAACAAATTTAG	GACUAAC	GACUAAC	10	2		NA	NA	NA	No	YES	No	NA	No	NA	NA	0	0	No	No
II	2895864	2896000	137	1	SPBP4H10.12	SPBP4H10.12.1:exon:1-SPBP4H10.12.1:exon:2	int_2978	1	1	0	0	0	1	1	1	A	AGCUACUAAUU	19	1	Awan_Short	0	0	5.52538	5.84539	0.0714286	0.0769231	-16.6096	-16.6096	GTATGATACTCAAACATGCTGAATGTTTGTTCGCGTTTCGACGTTAGCGGCACTCGATAAACAGTTGGAAGATTTGATTAAATACGATGAATCCCTCAAATATAAAGCGACAGCTACTAATTTTCATTACTGTGTAG	UACUAAU	CUACUAA	19	1		NA	NA	NA	No	No	No	No	No	NA	NA	0	0	No	No
I	2132427	2132544	118	-1	SPAC20H4.11c	SPAC20H4.11c.1:exon:2-SPAC20H4.11c.1:exon:1	int_1623	4	4	0	0	0	3	2	1	A;A	UCUACUAACAA;AUCUACUAACA	13;14	3;1	Awan_Short	5	3	1.07781	1.36962	3	4	1.90217	1.96132	GTACGTTTGCCCTTTTAGAAATTCTATTCATTGTTATCGAGCTTTTCAAATGTGAATTTGATTTATCTAAACAACAATTGTGTTTTTAAAGCGATTAATCTACTAACAATTATTTTAG	UACUAAC	UACUAAC	13	3		NA	NA	NA	No	YES	No	No	No	NA	NA	0	0	No	No
III	2281913	2282026	114	1	SPCC1840.12	SPCC1840.12.1:exon:1-SPCC1840.12.1:exon:2	int_4855	1	1	0	0	0	1	1	1	A	GAUAUUAACUU	20	1	Awan_Short	1	0	1.86453	1.15634	1	0.333333	3.0726	2.89311	GTAAGTCAAAGCTAATCCTACTTTTTCCTTTTTTTTTTTTTTTTAGAAGCTGTCATTCAGGATTTCCATTACTATCCCTTCAACCTTGATATTAACTTCTCACTTTCTTTGTAG	AGCUAAU	UAUUAAC	20	1		NA	NA	NA	No	No	No	No	No	SPCC1840.12_intron1	UAUUAAC	18	1	YES	No
III	1664645	1664758	114	-1	SPCC1902.02	SPCC1902.02.1:exon:2-SPCC1902.02.1:exon:1	int_5189	6	4	2	0	0	5	1	2	A	UUUGCUAACGU	11	6	Awan_Short;Awan_Long	41	23	4.06616	3.64176	14	12	5.59788	4.6673	GTATGGTTTTTTTTTGTTTAAACTGCGTGTTATTTTATTTTTTGTATTGAATATCGCGTGCATTAATTTGATCGCTTTTAAAAAATTTATAATTTTTTTGCTAACGTGCTTTAG	UGCUAAC	UGCUAAC	11	6		NA	NA	NA	No	YES	No	NA	No	SPCC1902.02_intron1	UGCUAAC	9	1	YES	No
III	1615784	1615865	82	-1	SPCC777.10c	SPCC777.10c.1:exon:3-SPCC777.10c.1:exon:2	int_5178	7	7	0	0	0	5	1	1	A	UUGAUUAACAU	10	7	Awan_Short	15	9	4.22739	3.70206	5.33333	10	3.65464	2.77653	GTAAGTTTGTGATTCCGCATGAAAGAATATTTGGTGTAGACTTTTTGAGACTATTATTTTTTATTTTGATTAACATGAAAAG	GAUUAAC	GAUUAAC	10	7		NA	NA	NA	No	YES	No	NA	No	SPCC777.10c_intron2	GAUUAAC	8	4	YES	No
I	722996	723062	67	-1	SPAPJ696.01c	SPAPJ696.01c.1:exon:2-SPAPJ696.01c.1:exon:1	int_1272	4	4	0	0	0	4	2	1	A;A	AUUUCUAACUU;GAUUUCUAACU	9;10	3;1	Awan_Short	11	2	4.35379	4.40856	3	0.5	5.25123	5.24758	GTATGTGTGTAACGTCTGTAGTTTATTTTCCCTCCAATACTTAACTCTTCGATTTCTAACTTCGTAG	UUCUAAC	UUCUAAC	9	3		NA	NA	NA	No	YES	No	NA	No	SPAPJ696.01c_intron1	UUCUAAC	7	1	YES	No
II	3786056	3786200	145	1	SPBC31F10.16	SPBC31F10.16.1:exon:2-SPBC31F10.16.1:exon:3	int_3251	5	3	2	0	0	4	2	2	A;A	AUUAUUAACCU;UAUUAUUAACC	12;13	3;2	Awan_Short;Awan_Long	10	9	8.2012	8.54132	1.22222	1.25	6.71772	6.62698	GTATGTCACTTTTTAAAGCAGCGAAAGCTGTAGTGTTAATGATGTTGGAGATTAGTGGGGAAAGGATCAAGACAAGTCTCTCTTTACCAAACTTTTCACTCCTATTGAAACGTTAACGTTTTACGTATTATTAACCTCGTCAAAG	UAUUAAC	UAUUAAC	12	3		NA	NA	NA	No	YES	No	NA	No	NA	NA	0	0	No	No
I	4468769	4468967	199	-1	SPAC9E9.13	SPAC9E9.13.1:exon:2-SPAC9E9.13.1:exon:1	int_2160	47	5	42	0	0	22	3	2	A;A;A	GUUACUAACAU;UCUUCACAUAA;UGUUACUAACA	12;93;13	26;18;3	Awan_Short;Awan_Long	252	169	11.4662	11.9346	3.89231	4.47368	7.68817	7.55979	GTATGTTACAACAAAAATCCGTAACACCTTATACTGCGAAGAATCTGAGACGAGAATAAGCCGAATAATTCTCGTTTGAAGATAGTATTTTCTTCGGTTTCTTCACATAAAATATTTGATTAGCGGTTTTGTATATTCTGTTTTCCAATGTACATTTATTTGCGTGTTTTATTAGTGCTTGTTACTAACATTCGTTTAG	UACUAAC	UACUAAC	12	26	UUCACAU	93	18	NA	No	YES	No	NA	No	SPAC9E9.13_intron1	UUACUAA	11	1	YES	No
I	972645	972756	112	-1	SPAC222.13c	SPAC222.13c.1:exon:2-SPAC222.13c.1:exon:1	int_1339	6	6	0	0	0	6	2	1	A;A	UUAUCUAACUU;AUUAUCUAACU	11;12	5;1	Awan_Short	79	77	5.56813	5.45986	20	26	5.15192	5.05577	GTAAGTCACATATCACTTTAGCTATTCTGCGTGAAAGTTAAAATGATGTTTAATTTCTTTCACCGCGTGGAATAATTTCTGCACTTTTCGTACATTATCTAACTTGGTTTAG	AUCUAAC	AUCUAAC	11	5		NA	NA	NA	No	YES	No	NA	No	SPAC222.13c_intron1	AUCUAAC	9	1	YES	No
III	1324148	1324354	207	1	SPCC1322.16	SPCC1322.16.1:exon:1-SPCC1322.16.1:exon:2	int_4639	54	3	51	0	0	28	3	2	A;A;A	UAUGUUAACCA;AUAUGUUAACC;GUGAUGAAUUG	15;16;95	47;6;1	Awan_Short;Awan_Long	26	27	8.50536	8.52648	5.4	5.6	6.48466	6.32713	GTAGGTTACAAGAATTAAAACGTTGAGCGTACATAACTAAAGGTGACTGTAAGAAACATTCATTTGGTTTTTATACCTACTGTGAATTAAGCTTTTAGTTGCAAAGTGATGAATTGTGTTTATGGATTCTACTCTTCTCGAATAGCTAAGCTTTGAGGGGTTTTTGTTGGTTGTATTACTAGAAATATGTTAACCATTTTTCTTTAG	UGUUAAC	UGUUAAC	15	47	GAUGAAU	95	1	NA	No	YES	No	NA	No	SPCC1322.16_intron1	GAUGAAU;UGUUAAC	93;13	1;1	YES	No
III	951842	951974	133	-1	SPCPB16A4.04c	SPCPB16A4.04c.1:exon:3-SPCPB16A4.04c.1:exon:2	int_5081	4	2	2	0	0	3	1	2	A	GUUGCUAACUC	10	4	Awan_Short;Awan_Long	30	20	7.78781	7.72576	15.5	5.25	3.45717	3.35584	GTAAGTTTATATACAGTAGTTGTGTTTGGCTGAGAACTGTGACCGATAAACTCTTTTTACATATATTTTTTATATAATTTGGGATTACCTTCTATTTTATTTTTAAAAATTTGGTTGTTGCTAACTCTCGCAG	UGCUAAC	UGCUAAC	10	4		NA	NA	NA	No	YES	No	NA	No	NA	NA	0	0	No	No
II	635545	635733	189	-1	SPBC115.03	SPBC115.03.1:five_prime_UTR:2-SPBC115.03.1:exon:1	int_3505	3	2	1	0	0	3	1	2	A	UAUGCUUACAC	13	3	Awan_Short;Awan_Long	35	21	5.65245	5.91884	36	5.5	4.86091	4.63488	GTATGTCTAAAATCAAAGTTCGTAAAATAGACTGATTTCAAACATTTTCTTTCAAGTATTCACATGAATGCATTTTAGCATATGTTTAGCTAAATGATGATTATGTTTGATAAATGGATCCCTTCATTCGGTTAAAATTTTATAATTACCGATTATTAATATCTGATCATATGCTTACACTGTCGTTAG	AUCUGAU	UGCUUAC	13	3		NA	NA	NA	No	No	No	NA	No	SPBC115.03_intron1	UGCUUAC	11	2	YES	No
I	5099513	5099597	85	-1	SPAC1250.02	SPAC1250.02.1:exon:2-SPAC1250.02.1:exon:1	int_2305	2	2	0	0	0	2	2	1	A;A	UAUGCUAAUCA;AUAUGCUAAUC	10;11	1;1	Awan_Short	0	0	-1.03388	-16.6096	1	1	1.01326	1.52746	GTAAGTTACGACGAAAATAATGAGTGTAAATAAACATTCACAGATGAAAAGCGACGCAAGAAGGAAAATATGCTAATCATGGTAG	UGCUAAU	UGCUAAU	10	1		NA	NA	NA	No	YES	No	NA	No	NA	NA	0	0	No	No
III	1349025	1349111	87	-1	SPCC338.15	SPCC338.15.1:exon:3-SPCC338.15.1:exon:2	int_5141	4	4	0	0	0	2	2	1	A;A	UACGCUAACGC;UUACGCUAACG	17;18	3;1	Awan_Short	33	10	4.35881	5.22436	34	5.5	4.75099	4.00217	GTATGTGGCTTATGATTATTGATATCAACATGATTTCAGTTTAGAAAATGTGTATGATAAACTTACGCTAACGCACTTTATGAATAG	CGCUAAC	CGCUAAC	17	3		NA	NA	NA	No	YES	No	NA	No	NA	NA	0	0	No	No
I	4951566	4951736	171	1	SPAC1B3.13	SPAC1B3.13.1:exon:1-SPAC1B3.13.1:exon:2	int_1024	5	4	1	0	0	5	1	2	A	UUUACUAAUUU	8	5	Awan_Short;Awan_Long	92	61	7.98692	8.15934	23.25	12.4	5.34364	5.07602	GTATGTTTTTTTTTATTAAAGGTTGGGTAGCCTTGAACAGACTGCTTTTGCTCAATTTTCTTAATTGAAATATATAACACGAAATGATCTGTAAGAATTTCATTCCTGTCTGTACTTGCCGCTGCTTTTCTAGTATTTTTCAGTTTTTAAGTTATTTTTACTAATTTTTAG	UACUAAU	UACUAAU	8	5		NA	NA	NA	No	YES	No	NA	No	NA	NA	0	0	No	No
I	4383594	4383749	156	1	SPAC1527.02	SPAC1527.02.1:exon:2-SPAC1527.02.1:exon:3	int_875	4	4	0	0	0	4	2	1	A;A	AUUGCUAACUU;GAUUGCUAACU	14;15	3;1	Awan_Short	31	20	6.56582	6.90546	4.57143	1.90909	4.88391	4.8052	GTATGTTATAGAAAAGCCAAATTCAATTTTGGTACAATCTCTTTTTTGAAATGTATACATCCCCTATTGTAGAACATGGGTTTCGTATTATAACTTTGCAGTAATCTGGCCTCTATGATTGCTACTTTTTTTTCGATTGCTAACTTATTTCTTTAG	UGCUAAC	UGCUAAC	14	3		NA	NA	NA	No	YES	No	NA	No	SPAC1527.02_intron2	UGCUAAC	12	2	YES	No
I	2445413	2445472	60	1	SPAC32A11.01	SPAC32A11.01.1:exon:1-SPAC32A11.01.1:exon:2	int_530	1	1	0	0	0	1	1	1	A	UUUAUUAACAA	13	1	Awan_Short	7	7	4.37549	3.76041	1.6	0.888889	4.78303	4.5984	GTAGGATCAGTTGTTCCAAGTGAGATATCGCGTCAATTTTTTTATTAACAATTAACACAG	AAUUAAC	UAUUAAC	13	1		NA	NA	NA	No	No	No	NA	No	SPAC32A11.01_intron1	UAUUAAC	11	1	YES	No
II	4374886	4375042	157	-1	SPBC1539.07c	SPBC1539.07c.1:exon:2-SPBC1539.07c.1:exon:1	int_4344	2	2	0	0	0	2	2	1	A;A	UGUACUAAUAA;GUGUACUAAUA	16;17	1;1	Awan_Short	11	9	3.47318	4.34996	6	5	3.37549	3.37779	GTATGAAAAAGAAAACGTAAATCATTGTCTAAAGTGTAAATGATATTGGTGCTGTAAGTCCACCAAAGGTTTACTTTTGATATTATTGTTCATCCATGAGTATATGGATAATTATCTTTTATTTTTTCTTTCTGTGTACTAATAACATTCGTTTTAG	UACUAAU	UACUAAU	16	1		NA	NA	NA	No	YES	No	No	No	NA	NA	0	0	No	No
III	1740343	1740509	167	-1	SPCC1450.08c	SPCC1450.08c.1:exon:2-SPCC1450.08c.1:exon:1	int_5200	3	3	0	0	0	1	1	1	A	CAUAUUAAUUU	10	3	Awan_Short	1	1	-0.00820516	0.605532	2	2	-0.601773	-0.309964	GTAAGAATTGTAAATAATAAGAAAGGAATTACTCAATTGAAATTGAAGCTTGCCATCGTAGTCAAATTGCATGCTTTGGTCATTGTTTACAGTTGGCCATGCAATGCACACATTTTAATACATGTTCTTTCTTTACTAAAGTCTTTCAATCATATTAATTTAAACAG	UAUUAAU	UAUUAAU	10	3		NA	NA	NA	No	YES	No	No	No	NA	NA	0	0	No	No
I	1030927	1030997	71	1	SPAC139.06	SPAC139.06.1:exon:4-SPAC139.06.1:exon:5	int_229	1	1	0	0	0	1	1	1	A	UUUAUUAACAA	11	1	Awan_Short	45	21	1.22574	2.51755	23	22	4.64679	4.26875	GTAAGTTTGTTATTTTCTACGCGTCTACTTTCCTTTTACCTTTTTATCGAGGTTTTATTAACAAAAATAAG	UAUUAAC	UAUUAAC	11	1		NA	NA	NA	No	YES	No	NA	No	NA	NA	0	0	No	No
I	4264488	4264544	57	-1	SPAC2C4.03c	SPAC2C4.03c.1:exon:2-SPAC2C4.03c.1:exon:1	int_2117	1	1	0	0	0	1	1	1	A	UUUUCUAAUAA	9	1	Awan_Short	132	113	1.86453	2.15634	66.5	114	6.93035	6.93458	GTATGTCTTTTGTCCTTTTATCTAAAATTTTTTGATTTCTTTTTTCTAATAATTTAG	UUCUAAU	UUCUAAU	9	1		NA	NA	NA	No	YES	No	NA	No	NA	NA	0	0	No	No
I	2804122	2804387	266	1	SPAC1805.17	SPAC1805.17.1:five_prime_UTR:1-SPAC1805.17.1:exon:1	int_605	2	2	0	0	0	2	1	1	A	GUAAUUAAUCA	113	2	Awan_Short	9	3	6.3809	6.03408	0.344828	0.2	6.20365	6.25226	GTAAGCACTTTGAACGCTCGTGTAGATACGTGTTATTTTCCTTGGTCTTCTTTTAGGAAGGATCTTGTTATCTTTCGATTTCCTGTTCTTCGATCTCTTGTTTGAGTTAATTATTGTTTTTTCTCTATTATTTTTGCAAGGGAGGAGTAATTAATCAGCAAGTAGGAGATTAAAAATTTATATTATTTTGTTTCTATTCGATAAAATTAATTTTTCTTCTACTTTTTTTTATTTTTTTTTTCAAATTTCTAACTTGATTGCTGAAG	UUCUAAC	AAUUAAU	113	2		NA	NA	NA	No	No	No	NA	No	SPAC1805.17_intron1	AAUUAAU	111	1	YES	No
I	4863148	4863232	85	-1	SPAC4F10.15c	SPAC4F10.15c.1:exon:2-SPAC4F10.15c.1:exon:1	int_2243	1	1	0	0	0	1	1	1	A	CCUUCUAACGU	9	1	Awan_Short	14	11	2.77345	3.42783	15	4	4.40767	3.82147	GTATGTGTATGAAGCTTTGATACTCAAAGCAAACTACAAAGAGTGGTATACAATTTAATTGAATTATAACCTTCTAACGTTTTAG	UUCUAAC	UUCUAAC	9	1		NA	NA	NA	No	YES	No	NA	No	SPAC4F10.15c_intron1	UUCUAAC	7	1	YES	No
I	1049199	1049364	166	1	SPAC23C4.12	SPAC23C4.12.1:exon:1-SPAC23C4.12.1:exon:2	int_240	11	4	7	0	0	8	3	2	A;A;A	CUUUCUAACAU;UUACUUAAGUA;UAGCUCGAUGU	8;136;74	7;3;1	Awan_Short;Awan_Long	6	7	9.01027	9.03204	2.33333	4	5.17087	5.21604	GTAAGTAGTGCTTTAATATTTTTTTACTTAAGTATAAGTTGGATTTCTTTCGGAACTCCAATTTCTTCTTTATATCTATCAACCGTAGCTCGATGTTTTACAACCAAAAAGGAAAAGCAAAAGTTACTCCATTTGGTTATTTTTCTTTTTTCTTTCTAACATTTAG	UUCUAAC	UUCUAAC	8	7	ACUUAAG	136	3	NA	No	YES	No	NA	No	NA	NA	0	0	No	No
I	621853	621988	136	-1	SPAC1F3.04c	SPAC1F3.04c.1:exon:2-SPAC1F3.04c.1:exon:1	int_1246	17	5	12	0	0	8	1	2	A	GAUUUUAACGC	9	17	Awan_Short;Awan_Long	20	10	7.47042	7.29064	1.75	1.83333	4.82879	4.67246	GTAAGTTGAGAACCGTTAGAAAGAAACCCGATCTTAAACTCTTGTCGAATGTTTGCTGTATACAGCGCAAGGGCACTAAGACTAATTATTAATATTTTTTTACCATTTTGCTATGTATCAGATTTTAACGCTGCAG	GACUAAU	UUUUAAC	9	17		NA	NA	NA	No	No	No	No	No	NA	NA	0	0	No	No
I	3612675	3612876	202	1	SPAC17G6.12	SPAC17G6.12.1:exon:4-SPAC17G6.12.1:exon:5	int_740	7	1	6	0	0	5	2	2	A;A	CGUGCUAAUUG;UCGUGCUAAUU	13;14	6;1	Awan_Short;Awan_Long	14	11	7.83492	7.84514	1.5	3	3.80914	3.72244	GTGAGTTTAAATATCGGTTTTTTATTTATAATTCTACGACAAAGATTTCATTGCACCTCGAGTGTTCAGCAGTTTTCTTTAATTTCTAAACATTTTCTCTGGACATTTTAAAGAGTGCTAGCATAAGCATCTGGTCTTTTATTATGATTAAGGAATAAATTGCATTATGTGGTAATTTTTCTCGTGCTAATTGGCGCTTTAG	UGCUAAU	UGCUAAU	13	6		NA	NA	NA	No	YES	No	No	No	NA	NA	0	0	No	No
I	1586864	1586943	80	1	SPAC23H4.13c	SPAC23H4.13c.1:exon:1-SPAC23H4.13c.1:exon:2	int_347	3	3	0	0	0	3	1	1	A	CCAACUCACCA	12	3	Awan_Short	11	10	3.754	3.93033	2.4	1.57143	2.34827	2.49569	GTAAGTACACATTCTTAGCAAGTTGTGGTTAGTTTTTATATTTACTGGTTCTTATTTACGTCCAACTCACCAAATTCTAG	ACCAAAU	AACUCAC	12	3		NA	NA	NA	No	No	No	NA	YES	SPAC23H4.13c_intron1	AACUCAC	10	1	YES	No
I	415686	415762	77	1	SPAC31A2.14	SPAC31A2.14.1:exon:1-SPAC31A2.14.1:exon:2	int_53	2	2	0	0	0	2	1	1	A	CGUUCUAACAU	11	2	Awan_Short	5	3	3.69366	3.85994	1.2	0.363636	3.53677	3.44102	GTAAGCCTTTGAAAAATTTAATTATCTCTGGAGAATAGCGGTAGCCTTATAGAAATTGACGTTCTAACATTTATTAG	UUCUAAC	UUCUAAC	11	2		NA	NA	NA	No	YES	No	NA	No	SPAC31A2.14_intron1	UUCUAAC	9	1	YES	No
I	1923086	1923192	107	1	SPAP14E8.02	SPAP14E8.02.1:exon:1-SPAP14E8.02.1:exon:2	int_408	7	7	0	0	0	5	1	1	A	UUUACUAAUAU	12	7	Awan_Short	61	49	6.38221	6.90883	5.16667	50	5.36191	5.26124	GTAAGGTTGATTCCACGGTGATTAGTTAAGAAAACTGTGTAAACCAAAAGAGAATCATGCCTCTTTACCAATTGACTTGAATCTAACTTTTACTAATATTAATTTAG	UACUAAU	UACUAAU	12	7		NA	NA	NA	No	YES	No	No	No	SPAP14E8.02_intron1	UACUAAU	10	2	YES	No
III	1367107	1367284	178	1	SPCC338.05c	SPCC338.05c.1:exon:3-SPCC338.05c.1:exon:4	int_4651	18	2	16	0	0	12	6	2	A;A;A;A;A;A	CGAAGAGAAGC;CAUACUAACGU;UUACGCGAAAU;AGAAGCUAAUU;AACGAAGAGAA;UUAACGAAGAG	62;11;46;57;64;66	11;3;1;1;1;1	Awan_Long;Awan_Short	46	29	7.78239	8.02446	15.6667	30	6.86988	6.96614	GTATGTGTATATTAGAGAAAGTTTGTAAAATACCTCATGTTCTCTGTAAATTCTTTTCATAGCAAATATCAGTATATTGTATGAAAATGAGAATTTGGTGTTGGCTTAACGAAGAGAAGCTAATTTTACGCGAAATAAAAAAATCAAGCTTTTTTCAGTTCATACTAACGTTAATTAG	UACUAAC	AAGAGAA	62	11	UACUAAC	11	3	NA	YES	No	YES	No	No	SPCC338.05c_intron3	UACUAAC	9	1	YES	No
I	578587	578680	94	1	SPAC13A11.03	SPAC13A11.03.1:exon:1-SPAC13A11.03.1:exon:2	int_91	8	8	0	0	0	5	1	1	A	AUUGCUAAUCU	19	8	Awan_Short	17	16	4.75163	4.06691	1.05882	1.30769	4.41201	4.24979	GTAAGTTCGTGATATGATTGTTCAAGTGCCAAAACATGATTTTTGCCCATTCGTGTCTCACTTTCCACATTGCTAATCTATGTTTTTTTTATAG	UGCUAAU	UGCUAAU	19	8		NA	NA	NA	No	YES	No	No	No	SPAC13A11.03_intron1	UGCUAAU	17	4	YES	No
I	4002861	4002963	103	1	SPAC27E2.01	SPAC27E2.01.1:exon:1-SPAC27E2.01.1:exon:2	int_839	1	1	0	0	0	1	1	1	A	GUUAUUAACAU	12	1	Awan_Short	23	16	1.85891	2.15073	24	17	4.494	4.59122	GTAAGTTTTTTTTTCAAATGAAATTTCCTTTTCTTTTAAGGAAGAAAAAGTGAAATTCGTTTACTCATGTATCCCTTACTTTATGTTATTAACATGGTTGAAG	UAUUAAC	UAUUAAC	12	1		NA	NA	NA	No	YES	No	No	No	NA	NA	0	0	No	No
[truncated: 338 more rows]
