# Supplementary material for: LaSSO, a strategy for genome-wide mapping of intronic lariats and branch points using RNA-seq
Source: HighWire-hosted journal article supplement (doi:10.1101/gr.166819.113), 2014-04-07
Supplement: Supplemental_Table8.xlsx [file Supplemental_Table8.xlsx]

## Sheet: Supplemental Table 9
Supplemental Table 8. Exon-skipping events identified by LaSSO using RNA-seq dataset from this study
Branch-point index: distance of branch-point from 3' splice acceptor site, i.e. terminal intron
BP: Branch-point; BS: Branch-site; Lar: Lariat; SplEff: Splicing Efficiency; Int_seq: Intron sequence; sur_exon: flanking exons; Junc: junction; Canonical Junction: canonical splicing event by which single intron is spliced; SecondIntIplicated: 3'terminal intron where skipping branch-point is located.
Accession	LarReads	LarReads_dbr1_1	LarReads_dbr1_2	LarReads_wt_1	LarReads_wt_2	LarSeq	NoBranches	NoSamples	BranchpointLetters	BranchSites	BranchPointIdx	BranchPointReads	Samples	Exon_Skipped	ExonSkipedWidth	ExonSkipedJunc	CanonicalJunc	PrimaryBS_Seq	PrimaryBP_idx	PrimaryBP_reads	SecondaryBS_Seq	SecondaryBP_idx	SecondaryBP_reads	AdditionalBP	SkippedJunctionReads_Dbr1_1	SkippedJunctionReads_Dbr1_2	SkippedJunctionReads_wt_1	SkippedJunctionReads_wt_2	CanonicalJunctionReads_Dbr1_1	CanonicalJunctionReads_Dbr1_2	CanonicalJunctionReads_wt_1	CanonicalJunctionReads_wt_2	SecondIntImplicated	FirstIntronBS	SecondIntronBS	TerminalBranchSameAsCanonical	ExonsAndFlankingIntronsLength	ExonsAndFlankingIntronsDivisibleByThree	GeneFlaggedByDeseqAndSE	SkippingSupportedByJunctionReads	Detected_In_AwanEtAL_DatasetByLaSSO
SPAC1834.07_int_1_2	3	2	1	0	0	3	1	2	A	UGUACUAAUAU	11	3	dbr1_1;dbr1_2	SPAC1834.07.1:exon:2	100	SPAC1834.07.1:exon:1-SPAC1834.07.1:exon:3	SPAC1834.07.1:exon:1-SPAC1834.07.1:exon:2	UACUAAU	11	3		NA	NA	NA	2	0	0	0	21	24	31	47	SPAC1834.07.1:exon:2-SPAC1834.07.1:exon:3	GGCUGAC	UACUAAU	YES	361	No	YES	YES	No
SPAC8C9.05_int_2_3	4	3	1	0	0	4	2	2	A;A	UUCUCUAAUAA;CGUUGUAACCC	11;23	3;1	dbr1_1;dbr1_2	SPAC8C9.05.1:exon:3	29	SPAC8C9.05.1:exon:2-SPAC8C9.05.1:exon:4	SPAC8C9.05.1:exon:2-SPAC8C9.05.1:exon:3	CUCUAAU	11	3	UUGUAAC	23	1	NA	0	0	0	0	7	3	9	4	SPAC8C9.05.1:exon:3-SPAC8C9.05.1:exon:4	UUCUAAU	CUCUAAU	YES	189	YES	No	No	YES
SPAC22F3.07c_int_1_2	1	1	0	0	0	1	1	1	A	UCCACUAAUUU	13	1	dbr1_1	SPAC22F3.07c.1:exon:2	98	SPAC22F3.07c.1:exon:1-SPAC22F3.07c.1:exon:3	SPAC22F3.07c.1:exon:1-SPAC22F3.07c.1:exon:2	CACUAAU	13	1		NA	NA	NA	0	0	0	0	355	261	410	528	SPAC22F3.07c.1:exon:2-SPAC22F3.07c.1:exon:3	AACUAAC	CACUAAU	YES	196	No	YES	No	No
SPAC23C4.17_int_1_2	2	1	1	0	0	2	1	2	A	UCAGCUAACAU	8	2	dbr1_1;dbr1_2	SPAC23C4.17.1:exon:2	50	SPAC23C4.17.1:exon:1-SPAC23C4.17.1:exon:3	SPAC23C4.17.1:exon:1-SPAC23C4.17.1:exon:2	AGCUAAC	8	2		NA	NA	NA	0	0	0	0	22	31	65	75	SPAC23C4.17.1:exon:2-SPAC23C4.17.1:exon:3	UUUUAAC	AGCUAAC	YES	207	YES	No	No	No
SPBC409.03_int_1_2	1	1	0	0	0	1	1	1	A	AAUGUUGACAA	13	1	dbr1_1	SPBC409.03.1:exon:2	86	SPBC409.03.1:exon:1-SPBC409.03.1:exon:3	SPBC409.03.1:exon:1-SPBC409.03.1:exon:2	UGUUGAC	13	1		NA	NA	NA	0	0	2	1	18	16	52	44	SPBC409.03.1:exon:2-SPBC409.03.1:exon:3	UACUGAU	AUCUAAU	No	303	YES	YES	YES	No
SPBC649.04_int_1_2	17	9	8	0	0	4	2	2	A;A	ACGGUGAAGCA;UUACGUCAGUC	156;95	10;7	dbr1_1;dbr1_2	SPBC649.04.1:exon:2	182	SPBC649.04.1:exon:1-SPBC649.04.1:exon:3	SPBC649.04.1:exon:1-SPBC649.04.1:exon:2	GGUGAAG	156	10	ACGUCAG	95	7	NA	0	0	0	0	10	8	3	10	SPBC649.04.1:exon:2-SPBC649.04.1:exon:3	UACUAAC	UACUAAC	No	461	No	YES	No	No
SPAC22G7.02_int_1_2	1	1	0	0	0	1	1	1	A	GUUUCUGAUCA	8	1	dbr1_1	SPAC22G7.02.1:exon:2	126	SPAC22G7.02.1:exon:1-SPAC22G7.02.1:exon:3	SPAC22G7.02.1:exon:1-SPAC22G7.02.1:exon:2	UUCUGAU	8	1		NA	NA	NA	0	0	0	0	20	9	16	30	SPAC22G7.02.1:exon:2-SPAC22G7.02.1:exon:3	UGCUAAU	UUCUGAU	YES	211	No	No	No	No
SPCC1840.04_int_1_2	1	1	0	0	0	1	1	1	A	UCUUGCUAAAA	13	1	dbr1_1	SPCC1840.04.1:exon:2	60	SPCC1840.04.1:exon:1-SPCC1840.04.1:exon:3	SPCC1840.04.1:exon:1-SPCC1840.04.1:exon:2	UUGCUAA	13	1		NA	NA	NA	0	0	0	0	7	3	4	6	SPCC1840.04.1:exon:2-SPCC1840.04.1:exon:3	UAUUAAC	GGUUGAU	No	147	YES	No	No	YES
SPAC140.03_int_2_3	4	2	2	0	0	4	1	2	A	UUUGCUGACAA	9	4	dbr1_1;dbr1_2	SPAC140.03.1:exon:3	18	SPAC140.03.1:exon:2-SPAC140.03.1:exon:4	SPAC140.03.1:exon:2-SPAC140.03.1:exon:3	UGCUGAC	9	4		NA	NA	NA	0	0	0	0	4	3	4	5	SPAC140.03.1:exon:3-SPAC140.03.1:exon:4	UACUAAC	UGCUGAC	YES	96	YES	No	No	No
SPAC31A2.10_int_2_3	1	1	0	0	0	1	1	1	A	ACAAUUGACUG	50	1	dbr1_1	SPAC31A2.10.1:exon:3	35	SPAC31A2.10.1:exon:2-SPAC31A2.10.1:exon:4	SPAC31A2.10.1:exon:2-SPAC31A2.10.1:exon:3	AAUUGAC	50	1		NA	NA	NA	0	0	0	0	6	6	3	6	SPAC31A2.10.1:exon:3-SPAC31A2.10.1:exon:4	CACUAAC	AACUAAC	No	235	No	No	No	No
SPBC13G1.12_int_5_6	1	1	0	0	0	1	1	1	A	AGAACUAACAC	12	1	dbr1_1	SPBC13G1.12.1:exon:6	72	SPBC13G1.12.1:exon:5-SPBC13G1.12.1:exon:7	SPBC13G1.12.1:exon:5-SPBC13G1.12.1:exon:6	AACUAAC	12	1		NA	NA	NA	0	0	0	0	72	71	108	159	SPBC13G1.12.1:exon:6-SPBC13G1.12.1:exon:7	UUCUGAC	AACUAAC	YES	179	No	YES	No	No
SPAC26A3.05_int_1_2	3	2	1	0	0	3	1	2	A	UUUGCUAACUA	16	3	dbr1_1;dbr1_2	SPAC26A3.05.1:exon:2	74	SPAC26A3.05.1:exon:1-SPAC26A3.05.1:exon:3	SPAC26A3.05.1:exon:1-SPAC26A3.05.1:exon:2	UGCUAAC	16	3		NA	NA	NA	0	0	0	0	51	41	47	72	SPAC26A3.05.1:exon:2-SPAC26A3.05.1:exon:3	CGCUAAU	UGCUAAC	YES	170	No	No	No	No
SPCC548.04_int_1_2	1	1	0	0	0	1	1	1	A	AGAACUAACAC	14	1	dbr1_1	SPCC548.04.1:exon:2	153	SPCC548.04.1:exon:1-SPCC548.04.1:exon:3	SPCC548.04.1:exon:1-SPCC548.04.1:exon:2	AACUAAC	14	1		NA	NA	NA	0	0	0	0	5	7	9	14	SPCC548.04.1:exon:2-SPCC548.04.1:exon:3	UGGUAAC	AACUAAC	YES	279	YES	YES	No	No
SPAC56F8.11_int_1_2	2	2	0	0	0	1	1	1	A	GCGUAUUAACC	12	2	dbr1_1	SPAC56F8.11.1:exon:2	154	SPAC56F8.11.1:exon:1-SPAC56F8.11.1:exon:3	SPAC56F8.11.1:exon:1-SPAC56F8.11.1:exon:2	GUAUUAA	12	2		NA	NA	NA	0	0	0	1	11	5	6	15	SPAC56F8.11.1:exon:2-SPAC56F8.11.1:exon:3	UAUUAAC	UAUUAAC	No	413	No	No	YES	No
SPAC22F3.05c_int_4_5	5	3	2	0	0	5	1	2	A	CAAGCUAACAA	13	5	dbr1_1;dbr1_2	SPAC22F3.05c.1:exon:5	81	SPAC22F3.05c.1:exon:4-SPAC22F3.05c.1:exon:6	SPAC22F3.05c.1:exon:4-SPAC22F3.05c.1:exon:5	AGCUAAC	13	5		NA	NA	NA	0	1	1	0	4	1	6	12	SPAC22F3.05c.1:exon:5-SPAC22F3.05c.1:exon:6	UCUUAAC	AGCUAAC	YES	161	No	YES	YES	YES
SPAC1639.02c_int_3_4	1	1	0	0	0	1	1	1	A	UGUAUUAACUC	11	1	dbr1_1	SPAC1639.02c.1:exon:10	956	SPAC1639.02c.1:exon:11-SPAC1639.02c.1:exon:9	SPAC1639.02c.1:exon:11-SPAC1639.02c.1:exon:10	UAUUAAC	11	1		NA	NA	NA	0	0	0	0	11	7	16	26	SPAC1639.02c.1:exon:10-SPAC1639.02c.1:exon:9	GUCUAAU	UAUUAAC	YES	1123	No	YES	No	No
SPBC577.13_int_2_3	1	1	0	0	0	1	1	1	A	ACCUCUAACCG	13	1	dbr1_1	SPBC577.13.1:exon:3	52	SPBC577.13.1:exon:2-SPBC577.13.1:exon:4	SPBC577.13.1:exon:2-SPBC577.13.1:exon:3	CUCUAAC	13	1		NA	NA	NA	0	0	0	0	22	10	17	27	SPBC577.13.1:exon:3-SPBC577.13.1:exon:4	UGUUAAC	CUCUAAC	YES	147	YES	No	No	No
SPCC1259.15c_int_1_2	1	1	0	0	0	1	1	1	A	UACGACUAACG	16	1	dbr1_1	SPCC1259.15c.1:exon:4	28	SPCC1259.15c.1:exon:5-SPCC1259.15c.1:exon:3	SPCC1259.15c.1:exon:5-SPCC1259.15c.1:exon:4	CGACUAA	16	1		NA	NA	NA	0	0	0	0	41	21	23	36	SPCC1259.15c.1:exon:4-SPCC1259.15c.1:exon:3	UAUUAAC	GACUAAC	No	247	No	No	No	No
SPBC530.13_int_2_4	1	1	0	0	0	1	1	1	A	UUAACUAAUUU	12	1	dbr1_1	SPBC530.13.1:exon:3;SPBC530.13.1:exon:4	262	SPBC530.13.1:exon:2-SPBC530.13.1:exon:5	SPBC530.13.1:exon:2-SPBC530.13.1:exon:3	AACUAAU	12	1		NA	NA	NA	0	0	0	0	4	2	3	8	SPBC530.13.1:exon:4-SPBC530.13.1:exon:5	AACUAAC	AACUAAU	YES	531	YES	No	No	No
SPBC3B9.10_int_1_2	1	1	0	0	0	1	1	1	A	GUGGCUAACUU	8	1	dbr1_1	SPBC3B9.10.1:exon:2	106	SPBC3B9.10.1:exon:1-SPBC3B9.10.1:exon:3	SPBC3B9.10.1:exon:1-SPBC3B9.10.1:exon:2	GGCUAAC	8	1		NA	NA	NA	1	0	0	1	46	29	73	114	SPBC3B9.10.1:exon:2-SPBC3B9.10.1:exon:3	UACUAAU	GGCUAAC	YES	189	YES	YES	YES	No
SPBC19C7.10_int_1_2	1	1	0	0	0	1	1	1	A	GAAACUAAUAU	9	1	dbr1_1	SPBC19C7.10.1:exon:2	32	SPBC19C7.10.1:exon:1-SPBC19C7.10.1:exon:3	SPBC19C7.10.1:exon:1-SPBC19C7.10.1:exon:2	AACUAAU	9	1		NA	NA	NA	1	0	0	0	48	28	42	52	SPBC19C7.10.1:exon:2-SPBC19C7.10.1:exon:3	GACUAAU	AACUAAU	YES	108	YES	YES	YES	YES
SPAC8C9.05_int_1_2	2	1	1	0	0	2	2	2	A;A	ACUUCUAAUCC;GACUUCUAAUC	10;11	1;1	dbr1_1;dbr1_2	SPAC8C9.05.1:exon:2	34	SPAC8C9.05.1:exon:1-SPAC8C9.05.1:exon:3	SPAC8C9.05.1:exon:1-SPAC8C9.05.1:exon:2	UUCUAAU	10	1		NA	NA	NA	0	0	0	0	14	8	7	12	SPAC8C9.05.1:exon:2-SPAC8C9.05.1:exon:3	UACUAAU	UUCUAAU	YES	197	No	No	No	No
SPCPB16A4.02c_int_2_3	1	1	0	0	0	1	1	1	A	AUUCUUUAAUU	205	1	dbr1_1	SPCPB16A4.02c.1:exon:2	76	SPCPB16A4.02c.1:exon:3-SPCPB16A4.02c.1:exon:1	SPCPB16A4.02c.1:exon:3-SPCPB16A4.02c.1:exon:2	UCUUUAA	205	1		NA	NA	NA	0	0	0	0	3	6	7	10	SPCPB16A4.02c.1:exon:2-SPCPB16A4.02c.1:exon:1	CGCUAAC	UGCUAAC	No	407	No	YES	No	No
SPAC6F12.07_int_2_3	1	1	0	0	0	1	1	1	A	UACGUUAACCU	14	1	dbr1_1	SPAC6F12.07.1:exon:3	186	SPAC6F12.07.1:exon:2-SPAC6F12.07.1:exon:4	SPAC6F12.07.1:exon:2-SPAC6F12.07.1:exon:3	CGUUAAC	14	1		NA	NA	NA	4	3	1	3	81	82	161	281	SPAC6F12.07.1:exon:3-SPAC6F12.07.1:exon:4	CGCUUAC	GACUAAC	No	296	No	YES	YES	No
SPBC13G1.12_int_2_3	1	1	0	0	0	1	1	1	A	AUUACUAACUG	15	1	dbr1_1	SPBC13G1.12.1:exon:3	78	SPBC13G1.12.1:exon:2-SPBC13G1.12.1:exon:4	SPBC13G1.12.1:exon:2-SPBC13G1.12.1:exon:3	UACUAAC	15	1		NA	NA	NA	0	0	0	0	6	3	5	10	SPBC13G1.12.1:exon:3-SPBC13G1.12.1:exon:4	UUUUAAC	UACUAAC	YES	320	No	YES	No	No
SPAC23D3.16_int_1_2	1	1	0	0	0	1	1	1	A	UUUGCUAACUU	13	1	dbr1_1	SPAC23D3.16.1:exon:2	56	SPAC23D3.16.1:exon:1-SPAC23D3.16.1:exon:3	SPAC23D3.16.1:exon:1-SPAC23D3.16.1:exon:2	UGCUAAC	13	1		NA	NA	NA	0	2	2	2	45	31	49	55	SPAC23D3.16.1:exon:2-SPAC23D3.16.1:exon:3	AAUUAAC	UGCUAAC	YES	274	No	No	YES	No
SPBC1271.12_int_3_5	1	1	0	0	0	1	1	1	A	AUAUGGAAAGG	21	1	dbr1_1	SPBC1271.12.1:exon:4;SPBC1271.12.1:exon:3	202	SPBC1271.12.1:exon:5-SPBC1271.12.1:exon:2	SPBC1271.12.1:exon:5-SPBC1271.12.1:exon:4	AUGGAAA	21	1		NA	NA	NA	1	0	0	0	158	139	144	248	SPBC1271.12.1:exon:3-SPBC1271.12.1:exon:2	UACUAAC	GGCUAAC	No	556	No	YES	YES	YES
SPCC1620.05_int_3_4	1	1	0	0	0	1	1	1	A	AUUACUAACUA	10	1	dbr1_1	SPCC1620.05.1:exon:4	188	SPCC1620.05.1:exon:3-SPCC1620.05.1:exon:5	SPCC1620.05.1:exon:3-SPCC1620.05.1:exon:4	UACUAAC	10	1		NA	NA	NA	0	0	0	1	21	15	26	58	SPCC1620.05.1:exon:4-SPCC1620.05.1:exon:5	AAUUAAC	UACUAAC	YES	350	No	YES	YES	No
SPBC12D12.03_int_2_3	1	1	0	0	0	1	1	1	A	CUAUCUAACUU	11	1	dbr1_1	SPBC12D12.03.1:exon:3	86	SPBC12D12.03.1:exon:2-SPBC12D12.03.1:exon:4	SPBC12D12.03.1:exon:2-SPBC12D12.03.1:exon:3	AUCUAAC	11	1		NA	NA	NA	0	2	1	0	298	304	486	618	SPBC12D12.03.1:exon:3-SPBC12D12.03.1:exon:4	UUUUAAC	AUCUAAC	YES	368	No	YES	YES	No
SPBC3B9.07c_int_1_2	1	1	0	0	0	1	1	1	A	AAUGCUAACUA	11	1	dbr1_1	SPBC3B9.07c.1:exon:2	199	SPBC3B9.07c.1:exon:3-SPBC3B9.07c.1:exon:1	SPBC3B9.07c.1:exon:3-SPBC3B9.07c.1:exon:2	UGCUAAC	11	1		NA	NA	NA	0	0	0	0	55	34	68	127	SPBC3B9.07c.1:exon:2-SPBC3B9.07c.1:exon:1	GACUAAC	UGCUAAC	YES	371	No	No	No	No
SPAC18G6.03_int_2_3	1	1	0	0	0	1	1	1	A	UUUACUAAUCU	11	1	dbr1_1	SPAC18G6.03.1:exon:2	81	SPAC18G6.03.1:exon:1-SPAC18G6.03.1:exon:3	SPAC18G6.03.1:exon:1-SPAC18G6.03.1:exon:2	UACUAAU	11	1		NA	NA	NA	0	2	1	1	112	80	193	253	SPAC18G6.03.1:exon:2-SPAC18G6.03.1:exon:3	AACUAAU	UACUAAU	YES	379	No	YES	YES	No
SPAC630.11_int_1_2	1	1	0	0	0	1	1	1	A	CGAGUCUAACU	16	1	dbr1_1	SPAC630.11.1:exon:2	19	SPAC630.11.1:exon:1-SPAC630.11.1:exon:3	SPAC630.11.1:exon:1-SPAC630.11.1:exon:2	AGUCUAA	16	1		NA	NA	NA	0	0	0	0	12	7	6	18	SPAC630.11.1:exon:2-SPAC630.11.1:exon:3	GGUUAAC	GUCUAAC	No	150	YES	No	No	No
SPCC1906.03_int_4_5	1	1	0	0	0	1	1	1	A	UUUACUUACCC	10	1	dbr1_1	SPCC1906.03.1:exon:5	63	SPCC1906.03.1:exon:4-SPCC1906.03.1:exon:6	SPCC1906.03.1:exon:4-SPCC1906.03.1:exon:5	UACUUAC	10	1		NA	NA	NA	0	0	0	0	0	0	0	0	SPCC1906.03.1:exon:5-SPCC1906.03.1:exon:6	CUCUAAC	ACCCGAU	No	153	YES	No	No	No
SPAC890.03_int_1_2	1	1	0	0	0	1	1	1	A	CUAUCUAACAA	17	1	dbr1_1	SPAC890.03.1:exon:2	94	SPAC890.03.1:exon:1-SPAC890.03.1:exon:3	SPAC890.03.1:exon:1-SPAC890.03.1:exon:2	AUCUAAC	17	1		NA	NA	NA	0	0	0	0	6	6	12	7	SPAC890.03.1:exon:2-SPAC890.03.1:exon:3	AUCUAAU	AUCUAAC	YES	208	No	YES	No	No
SPAC15E1.09_int_1_2	1	0	1	0	0	1	1	1	A	UAUGCUUACCU	10	1	dbr1_2	SPAC15E1.09.1:exon:2	21	SPAC15E1.09.1:exon:1-SPAC15E1.09.1:exon:3	SPAC15E1.09.1:exon:1-SPAC15E1.09.1:exon:2	UGCUUAC	10	1		NA	NA	NA	0	0	0	0	0	0	3	3	SPAC15E1.09.1:exon:2-SPAC15E1.09.1:exon:3	AACUAAC	AACUGAU	No	315	YES	No	No	No
SPCC23B6.01c_int_2_4	2	0	2	0	0	1	1	1	A	AUUGCUAACGA	15	2	dbr1_2	SPCC23B6.01c.1:exon:3;SPCC23B6.01c.1:exon:2	110	SPCC23B6.01c.1:exon:4-SPCC23B6.01c.1:exon:1	SPCC23B6.01c.1:exon:4-SPCC23B6.01c.1:exon:3	UGCUAAC	15	2		NA	NA	NA	2	0	2	3	283	307	723	769	SPCC23B6.01c.1:exon:2-SPCC23B6.01c.1:exon:1	UAUUGAC	UGCUAAC	YES	307	No	YES	YES	No
SPAC12B10.05_int_2_4	1	0	1	0	0	1	1	1	A	AUCGCUAACGU	9	1	dbr1_2	SPAC12B10.05.1:exon:3;SPAC12B10.05.1:exon:4	48	SPAC12B10.05.1:exon:2-SPAC12B10.05.1:exon:5	SPAC12B10.05.1:exon:2-SPAC12B10.05.1:exon:3	CGCUAAC	9	1		NA	NA	NA	0	0	0	0	7	7	29	39	SPAC12B10.05.1:exon:4-SPAC12B10.05.1:exon:5	GUCUAAC	CGCUAAC	YES	132	YES	No	No	No
SPCC1322.16_int_1_2	1	0	1	0	0	1	1	1	A	AAUACUAACUG	14	1	dbr1_2	SPCC1322.16.1:exon:2	267	SPCC1322.16.1:exon:1-SPCC1322.16.1:exon:3	SPCC1322.16.1:exon:1-SPCC1322.16.1:exon:2	UACUAAC	14	1		NA	NA	NA	1	0	0	0	26	27	24	36	SPCC1322.16.1:exon:2-SPCC1322.16.1:exon:3	UGUUAAC	UACUAAC	YES	530	No	YES	YES	No
SPAC630.11_int_1_3	1	0	1	0	0	1	1	1	A	AUUACUAAUGA	8	1	dbr1_2	SPAC630.11.1:exon:2;SPAC630.11.1:exon:3	92	SPAC630.11.1:exon:1-SPAC630.11.1:exon:4	SPAC630.11.1:exon:1-SPAC630.11.1:exon:2	UACUAAU	8	1		NA	NA	NA	0	0	0	0	12	7	6	18	SPAC630.11.1:exon:3-SPAC630.11.1:exon:4	GGUUAAC	UACUAAU	YES	211	No	No	No	No
SPCC1183.01_int_1_3	1	0	1	0	0	1	1	1	A	AAAACUAACAA	13	1	dbr1_2	SPCC1183.01.1:exon:2;SPCC1183.01.1:exon:3	282	SPCC1183.01.1:exon:1-SPCC1183.01.1:exon:4	SPCC1183.01.1:exon:1-SPCC1183.01.1:exon:2	AACUAAC	13	1		NA	NA	NA	0	0	0	0	40	21	65	91	SPCC1183.01.1:exon:3-SPCC1183.01.1:exon:4	AAUUGAU	AACUAAC	YES	421	No	No	No	No
SPBC1703.04_int_2_3	1	0	1	0	0	1	1	1	A	AUAAACUAACC	11	1	dbr1_2	SPBC1703.04.1:exon:3	173	SPBC1703.04.1:exon:2-SPBC1703.04.1:exon:4	SPBC1703.04.1:exon:2-SPBC1703.04.1:exon:3	AAACUAA	11	1		NA	NA	NA	1	0	0	0	0	0	2	2	SPBC1703.04.1:exon:3-SPBC1703.04.1:exon:4	UUUUAAC	AACUAAC	No	285	YES	No	YES	No
SPBC725.10_int_1_3	1	0	1	0	0	1	1	1	A	UGGAAUAAGAA	336	1	dbr1_2	SPBC725.10.1:five_prime_UTR:2;SPBC725.10.1:exon:1	526	SPBC725.10.1:five_prime_UTR:1-SPBC725.10.1:exon:2	SPBC725.10.1:five_prime_UTR:1-SPBC725.10.1:five_prime_UTR:2	GAAUAAG	336	1		NA	NA	NA	0	0	0	0	45	41	66	116	SPBC725.10.1:exon:1-SPBC725.10.1:exon:2	UACUAAU	UGCUGAC	No	1117	No	YES	No	No
SPAC2G11.06_int_2_3	1	0	1	0	0	1	1	1	A	AUGACUAACAU	9	1	dbr1_2	SPAC2G11.06.1:exon:3	487	SPAC2G11.06.1:exon:2-SPAC2G11.06.1:exon:4	SPAC2G11.06.1:exon:2-SPAC2G11.06.1:exon:3	GACUAAC	9	1		NA	NA	NA	0	0	0	0	5	2	4	4	SPAC2G11.06.1:exon:3-SPAC2G11.06.1:exon:4	UGCUAAU	GACUAAC	YES	656	No	No	No	No
SPBC713.05_int_1_2	1	0	1	0	0	1	1	1	A	UCUACUAACUU	10	1	dbr1_2	SPBC713.05.1:exon:2	37	SPBC713.05.1:exon:1-SPBC713.05.1:exon:3	SPBC713.05.1:exon:1-SPBC713.05.1:exon:2	UACUAAC	10	1		NA	NA	NA	0	0	0	0	4	6	9	18	SPBC713.05.1:exon:2-SPBC713.05.1:exon:3	AUCUAAU	UACUAAC	YES	125	No	No	No	No
SPAC30C2.05_int_1_2	1	0	1	0	0	1	1	1	A	AAUGCUAACUU	15	1	dbr1_2	SPAC30C2.05.1:exon:2	52	SPAC30C2.05.1:exon:1-SPAC30C2.05.1:exon:3	SPAC30C2.05.1:exon:1-SPAC30C2.05.1:exon:2	UGCUAAC	15	1		NA	NA	NA	0	2	1	0	21	14	12	26	SPAC30C2.05.1:exon:2-SPAC30C2.05.1:exon:3	UUUGAAU	UGCUAAC	YES	151	No	No	YES	No
SPBC4C3.10c_int_1_2	1	0	1	0	0	1	1	1	A	AUUUCUAACGU	10	1	dbr1_2	SPBC4C3.10c.1:exon:2	83	SPBC4C3.10c.1:exon:1-SPBC4C3.10c.1:exon:3	SPBC4C3.10c.1:exon:1-SPBC4C3.10c.1:exon:2	UUCUAAC	10	1		NA	NA	NA	0	0	0	1	405	241	300	407	SPBC4C3.10c.1:exon:2-SPBC4C3.10c.1:exon:3	UUCUGAC	UUCUAAC	YES	178	No	YES	YES	No
SPAC23C11.08_int_1_2	1	0	1	0	0	1	1	1	A	UUUACUGACCA	12	1	dbr1_2	SPAC23C11.08.1:exon:2	61	SPAC23C11.08.1:exon:1-SPAC23C11.08.1:exon:3	SPAC23C11.08.1:exon:1-SPAC23C11.08.1:exon:2	UACUGAC	12	1		NA	NA	NA	0	0	0	0	43	32	42	51	SPAC23C11.08.1:exon:2-SPAC23C11.08.1:exon:3	GUCUGAC	UACUGAC	YES	263	No	YES	No	No
SPBC11C11.01_int_1_2	1	0	1	0	0	1	1	1	A	CAAGUCUAAUG	11	1	dbr1_2	SPBC11C11.01.1:exon:2	59	SPBC11C11.01.1:exon:1-SPBC11C11.01.1:exon:3	SPBC11C11.01.1:exon:1-SPBC11C11.01.1:exon:2	AGUCUAA	11	1		NA	NA	NA	1	0	0	1	8	5	10	10	SPBC11C11.01.1:exon:2-SPBC11C11.01.1:exon:3	GCCUAAU	GUCUAAU	No	156	YES	YES	YES	No
