# Supplementary material for: LaSSO, a strategy for genome-wide mapping of intronic lariats and branch points using RNA-seq
Source: HighWire-hosted journal article supplement (doi:10.1101/gr.166819.113), 2014-04-07
Supplement: Supplemental_Table10.xlsx [file Supplemental_Table10.xlsx]

## Sheet: Supplemental Table 10
Supplemental Table 10. Exon-skipping events identified by LaSSO using 2D-Lariat-Seq dataset from Awan et al. (2013)
Branch-point index: distance of branch-point from 3' splice acceptor site i.e. terminal intron
BP: Branch-point; BS: Branch-site; Lar: Lariat; SplEff: Splicing Efficiency; Int_seq: Intron sequence; sur_exons: flanking exons; Junc: junction; Canonical Junction: canonical splicing event by which a single intron is spliced; SecondIntIplicated: 3'terminal intron where the skipping branch-point is located.
Accession	LarReads	Awan_Short	Awan_Long	LarReads_wt_1	LarReads_wt_2	LarSeq	NoBranches	NoSamples	BranchpointLetters	BranchSites	BranchPointIdx	BranchPointReads	Samples	Exon_Skipped	ExonSkipedWidth	ExonSkipedJunc	CanonicalJunc	PrimaryBS_Seq_2DLarSeq	PrimaryBP_idx_2DLarSeq	PrimaryBP_reads_2DLarSeq	SecondaryBS_Seq_2DLarSeq	SecondaryBP_idx_2DLarSeq	SecondaryBP_reads_2DLarSeq	AdditionalBP_2DLarSeq	SkippedJunctionReads_Dbr1_1	SkippedJunctionReads_Dbr1_2	SkippedJunctionReads_wt_1	SkippedJunctionReads_wt_2	CanonicalJunctionReads_Dbr1_1	CanonicalJunctionReads_Dbr1_2	CanonicalJunctionReads_wt_1	CanonicalJunctionReads_wt_2	SecondIntImplicated	FirstIntronBS	SecondIntronBS	TerminalBranchSameAsCanonical	ExonsAndFlankingIntronsLength	ExonsAndFlankingIntronsDivisibleByThree	GeneFlaggedByDeseqAndSE	SkippingSupportedByJunctionReads	Detected_In_AwanEtAL
SPAC4G9.14_int_2_3	5	5	0	0	0	2	1	1	A	GUACACCAAUU	26	5	Awan_Short	SPAC4G9.14.1:exon:3	23	SPAC4G9.14.1:exon:2-SPAC4G9.14.1:exon:4	SPAC4G9.14.1:exon:2-SPAC4G9.14.1:exon:3	ACACCAA	26	5		NA	NA		0	0	0	0	13	13	7	15	SPAC4G9.14.1:exon:3-SPAC4G9.14.1:exon:4	UACUAAC	UGCUAAC	No	225	YES	No	No	No
SPAC1782.07_int_1_3	1	1	0	0	0	1	1	1	A	AGCAGCUAUGG	70	1	Awan_Short	SPAC1782.07.1:exon:2;SPAC1782.07.1:exon:3	232	SPAC1782.07.1:exon:1-SPAC1782.07.1:exon:4	SPAC1782.07.1:exon:1-SPAC1782.07.1:exon:2	CAGCUAU	70	1		NA	NA		0	0	0	0	0	0	2	4	SPAC1782.07.1:exon:3-SPAC1782.07.1:exon:4	UACUAAC	UACUAAU	No	524	No	No	No	No
SPAC17G6.12_int_1_3	1	1	0	0	0	1	1	1	A	CAAAAAGAAGA	58	1	Awan_Short	SPAC17G6.12.1:exon:2;SPAC17G6.12.1:exon:3	152	SPAC17G6.12.1:exon:1-SPAC17G6.12.1:exon:4	SPAC17G6.12.1:exon:1-SPAC17G6.12.1:exon:2	AAAAGAA	58	1		NA	NA		0	0	0	0	12	8	26	25	SPAC17G6.12.1:exon:3-SPAC17G6.12.1:exon:4	UGCUGAU	UUCUAAC	No	308	No	No	No	No
SPAC1B3.05_int_1_2	1	1	0	0	0	1	1	1	A	UUUACUUACAU	13	1	Awan_Short	SPAC1B3.05.1:exon:2	38	SPAC1B3.05.1:exon:1-SPAC1B3.05.1:exon:3	SPAC1B3.05.1:exon:1-SPAC1B3.05.1:exon:2	UACUUAC	13	1		NA	NA		0	0	0	0	42	31	109	198	SPAC1B3.05.1:exon:2-SPAC1B3.05.1:exon:3	CAUUAAC	UUUUAAU	No	146	No	No	No	No
SPBP8B7.11_int_1_2	1	1	0	0	0	1	1	1	A	UUUCGAAACUC	48	1	Awan_Short	SPBP8B7.11.1:exon:2	75	SPBP8B7.11.1:exon:1-SPBP8B7.11.1:exon:3	SPBP8B7.11.1:exon:1-SPBP8B7.11.1:exon:2	UCGAAAC	48	1		NA	NA		0	0	0	0	80	34	52	99	SPBP8B7.11.1:exon:2-SPBP8B7.11.1:exon:3	UACUAAC	UAUUAAC	No	259	No	YES	No	No
SPAC17C9.11c_int_1_2	3	2	1	0	0	3	3	2	A;A;A	ACAUGGAAUAU;AAACGACAUAU;CUAAACGACAU	23;65;67	1;1;1	Awan_Short;Awan_Long	SPAC17C9.11c.1:exon:2	577	SPAC17C9.11c.1:exon:1-SPAC17C9.11c.1:exon:3	SPAC17C9.11c.1:exon:1-SPAC17C9.11c.1:exon:2	ACGACAU	65	1	AUGGAAU	23	1	AAACGAC;67;1;	0	0	0	1	93	62	58	113	SPAC17C9.11c.1:exon:2-SPAC17C9.11c.1:exon:3	UAUUAAC	UAUUAAC	No	880	No	No	YES	No
SPAC22H10.04_int_1_2	2	2	0	0	0	1	1	1	A	ACAAAUCAUUA	61	2	Awan_Short	SPAC22H10.04.1:exon:2	71	SPAC22H10.04.1:exon:1-SPAC22H10.04.1:exon:3	SPAC22H10.04.1:exon:1-SPAC22H10.04.1:exon:2	AAAUCAU	61	2		NA	NA		0	0	0	0	3	1	5	10	SPAC22H10.04.1:exon:2-SPAC22H10.04.1:exon:3	UGCUUAC	UGCUAAC	No	249	YES	No	No	No
SPCC594.01_int_1_2	4	4	0	0	0	2	1	1	A	UCGUUUUAUCU	55	4	Awan_Short	SPCC594.01.1:exon:1	1923	SPCC594.01.1:five_prime_UTR:1-SPCC594.01.1:exon:2	SPCC594.01.1:five_prime_UTR:1-SPCC594.01.1:exon:1	GUUUUAU	55	4		NA	NA		0	0	0	0	2	1	0	2	SPCC594.01.1:exon:1-SPCC594.01.1:exon:2	AGUUAAU	UGCUAAU	No	2075	No	YES	No	No
SPAC13F5.04c_int_1_2	1	1	0	0	0	1	1	1	A	CGAGACCAACU	48	1	Awan_Short	SPAC13F5.04c.1:exon:3	98	SPAC13F5.04c.1:exon:4-SPAC13F5.04c.1:exon:2	SPAC13F5.04c.1:exon:4-SPAC13F5.04c.1:exon:3	AGACCAA	48	1		NA	NA		0	0	0	0	0	2	2	4	SPAC13F5.04c.1:exon:3-SPAC13F5.04c.1:exon:2	UACUAAC	UACUAAC	No	567	YES	No	No	No
SPBC839.17c_int_1_2	2	2	0	0	0	2	1	1	A	CUUUCCAAAAC	37	2	Awan_Short	SPBC839.17c.1:exon:4	38	SPBC839.17c.1:exon:5-SPBC839.17c.1:exon:3	SPBC839.17c.1:exon:5-SPBC839.17c.1:exon:4	UUCCAAA	37	2		NA	NA		0	0	0	0	87	84	87	128	SPBC839.17c.1:exon:4-SPBC839.17c.1:exon:3	UUUUAAC	UGCUGAC	No	190	No	YES	No	No
SPAC18B11.04_int_2_3	3	3	0	0	0	1	1	1	A	AAAUCCAAGNN	2	3	Awan_Short	SPAC18B11.04.1:exon:2	344	SPAC18B11.04.1:exon:3-SPAC18B11.04.1:exon:1	SPAC18B11.04.1:exon:3-SPAC18B11.04.1:exon:2	AUCCAAG	2	3		NA	NA		0	0	0	0	8	4	2	3	SPAC18B11.04.1:exon:2-SPAC18B11.04.1:exon:1	AUCUAAC	UACUAAC	No	501	YES	YES	No	No
SPAC22F3.05c_int_2_3	3	3	0	0	0	3	1	1	A	UAAGCUUACUA	11	3	Awan_Short	SPAC22F3.05c.1:exon:3	73	SPAC22F3.05c.1:exon:2-SPAC22F3.05c.1:exon:4	SPAC22F3.05c.1:exon:2-SPAC22F3.05c.1:exon:3	AGCUUAC	11	3		NA	NA		6	1	9	7	4	4	21	30	SPAC22F3.05c.1:exon:3-SPAC22F3.05c.1:exon:4	GAUUGAU	UACUAAU	No	165	YES	YES	YES	YES
SPAC1B9.02c_int_2_3	1	1	0	0	0	1	1	1	A	UCUCCAUAAAU	32	1	Awan_Short	SPAC1B9.02c.1:exon:2	967	SPAC1B9.02c.1:exon:3-SPAC1B9.02c.1:exon:1	SPAC1B9.02c.1:exon:3-SPAC1B9.02c.1:exon:2	UCCAUAA	32	1		NA	NA		0	0	0	0	66	66	80	97	SPAC1B9.02c.1:exon:2-SPAC1B9.02c.1:exon:1	UACUAAC	GGCUAAC	No	1132	No	No	No	No
SPCC23B6.01c_int_3_4	13	13	0	0	0	8	2	1	A;A	AAAUGGGAAAU;UAUGUCGAAAA	24;95	12;1	Awan_Short	SPCC23B6.01c.1:exon:2	78	SPCC23B6.01c.1:exon:3-SPCC23B6.01c.1:exon:1	SPCC23B6.01c.1:exon:3-SPCC23B6.01c.1:exon:2	AUGGGAA	24	12	UGUCGAA	95	1		1	0	0	0	45	34	50	70	SPCC23B6.01c.1:exon:2-SPCC23B6.01c.1:exon:1	GGCUAAU	UGCUAAC	No	308	No	YES	YES	No
SPAC6F6.07c_int_1_3	5	5	0	0	0	4	3	1	A;A;A	CACCCACAUGA;UACACCCACAU;UAUAAAAAUUU	31;33;45	2;2;1	Awan_Short	SPAC6F6.07c.1:exon:3;SPAC6F6.07c.1:exon:2	80	SPAC6F6.07c.1:exon:4-SPAC6F6.07c.1:exon:1	SPAC6F6.07c.1:exon:4-SPAC6F6.07c.1:exon:3	CCCACAU	31	2	CACCCAC	33	2	TAAAAAT;45;1;	0	1	0	0	2075	1226	2210	2903	SPAC6F6.07c.1:exon:2-SPAC6F6.07c.1:exon:1	AACUAAC	UUCUAAC	No	247	No	YES	YES	No
SPBC1271.12_int_3_5	1	1	0	0	0	1	1	1	A	AAUGGAAAGUG	119	1	Awan_Short	SPBC1271.12.1:exon:4;SPBC1271.12.1:exon:3	202	SPBC1271.12.1:exon:5-SPBC1271.12.1:exon:2	SPBC1271.12.1:exon:5-SPBC1271.12.1:exon:4	UGGAAAG	119	1		NA	NA		1	0	0	0	158	139	144	248	SPBC1271.12.1:exon:3-SPBC1271.12.1:exon:2	UACUAAC	GGCUAAC	No	556	No	YES	YES	No
SPAC890.07c_int_6_7	1	1	0	0	0	1	1	1	A	UUAAUACAUAC	115	1	Awan_Short	SPAC890.07c.1:exon:3	335	SPAC890.07c.1:exon:4-SPAC890.07c.1:exon:2	SPAC890.07c.1:exon:4-SPAC890.07c.1:exon:3	AAUACAU	115	1		NA	NA		0	0	0	0	124	83	140	211	SPAC890.07c.1:exon:3-SPAC890.07c.1:exon:2	UACUAAU	UGCUAAU	No	769	No	YES	No	No
SPCC777.13_int_1_5	4	4	0	0	0	1	1	1	A	UCUCAGGACAU	28	4	Awan_Short	SPCC777.13.1:exon:4;SPCC777.13.1:exon:5	133	SPCC777.13.1:exon:3-SPCC777.13.1:exon:6	SPCC777.13.1:exon:3-SPCC777.13.1:exon:4	UCAGGAC	28	4		NA	NA		0	0	0	0	93	67	93	179	SPCC777.13.1:exon:5-SPCC777.13.1:exon:6	UACUAAU	UAUUAAC	No	274	No	No	No	No
SPAC890.07c_int_5_7	3	3	0	0	0	3	1	1	A	CCUUGCCAAAU	105	3	Awan_Short	SPAC890.07c.1:exon:4;SPAC890.07c.1:exon:3	630	SPAC890.07c.1:exon:5-SPAC890.07c.1:exon:2	SPAC890.07c.1:exon:5-SPAC890.07c.1:exon:4	UUGCCAA	105	3		NA	NA		0	0	0	0	121	67	141	181	SPAC890.07c.1:exon:3-SPAC890.07c.1:exon:2	UGCUAAC	UGCUAAU	No	974	No	YES	No	No
SPBC16G5.12c_int_2_4	1	1	0	0	0	1	1	1	A	ACAGAAAAAAC	34	1	Awan_Short	SPBC16G5.12c.1:exon:4;SPBC16G5.12c.1:exon:3	630	SPBC16G5.12c.1:exon:5-SPBC16G5.12c.1:exon:2	SPBC16G5.12c.1:exon:5-SPBC16G5.12c.1:exon:4	AGAAAAA	34	1		NA	NA		0	0	0	0	8	1	7	9	SPBC16G5.12c.1:exon:3-SPBC16G5.12c.1:exon:2	AACUAAU	AACUAAU	No	766	No	No	No	No
SPBC31F10.12_int_2_3	1	1	0	0	0	1	1	1	A	UAUACUAAUAC	10	1	Awan_Short	SPBC31F10.12.1:exon:3	98	SPBC31F10.12.1:exon:2-SPBC31F10.12.1:exon:4	SPBC31F10.12.1:exon:2-SPBC31F10.12.1:exon:3	UACUAAU	10	1		NA	NA		0	0	0	0	113	66	271	377	SPBC31F10.12.1:exon:3-SPBC31F10.12.1:exon:4	UACUGAU	UACUAAU	YES	269	No	YES	No	No
SPBC1703.10_int_3_4	4	1	3	0	0	2	2	2	A;A	GGUUCCGAGGC;GUUUCCGACGC	21;32	3;1	Awan_Long;Awan_Short	SPBC1703.10.1:exon:4	97	SPBC1703.10.1:exon:3-SPBC1703.10.1:exon:5	SPBC1703.10.1:exon:3-SPBC1703.10.1:exon:4	UUCCGAG	21	3	UUCCGAC	32	1		0	0	0	0	1215	925	2009	2522	SPBC1703.10.1:exon:4-SPBC1703.10.1:exon:5	UAUUAAC	GGCUAAU	No	319	No	No	No	No
SPCC1919.02_int_1_2	2	2	0	0	0	2	2	1	A;A	CUAGCUAAUUU;UCUAGCUAAUU	11;12	1;1	Awan_Short	SPCC1919.02.1:exon:2	64	SPCC1919.02.1:exon:1-SPCC1919.02.1:exon:3	SPCC1919.02.1:exon:1-SPCC1919.02.1:exon:2	AGCUAAU	11	1		NA	NA		0	0	0	0	0	5	1	3	SPCC1919.02.1:exon:2-SPCC1919.02.1:exon:3	AUCUAAU	AGCUAAU	YES	163	No	No	No	No
SPBC14C8.04_int_2_3	1	1	0	0	0	1	1	1	A	GUCACUGACCU	43	1	Awan_Short	SPBC14C8.04.1:exon:3	194	SPBC14C8.04.1:exon:2-SPBC14C8.04.1:exon:4	SPBC14C8.04.1:exon:2-SPBC14C8.04.1:exon:3	CACUGAC	43	1		NA	NA		2	0	0	2	378	284	195	307	SPBC14C8.04.1:exon:3-SPBC14C8.04.1:exon:4	GACUAAC	UUCUAAU	No	723	YES	No	YES	No
SPBC19G7.17_int_2_4	2	1	1	0	0	2	2	2	A;A	ACAUUUGACUU;UUUCCCGAUUU	22;44	1;1	Awan_Short;Awan_Long	SPBC19G7.17.1:exon:3;SPBC19G7.17.1:exon:4	146	SPBC19G7.17.1:exon:2-SPBC19G7.17.1:exon:5	SPBC19G7.17.1:exon:2-SPBC19G7.17.1:exon:3	UCCCGAU	44	1	AUUUGAC	22	1		1	0	0	0	123	108	101	218	SPBC19G7.17.1:exon:4-SPBC19G7.17.1:exon:5	UACUGAU	UGCUAAU	No	390	YES	YES	YES	No
SPAC323.02c_int_1_2	2	2	0	0	0	2	2	1	A;A	CGUUAAGAUGC;ACCUGCCAUUG	19;53	1;1	Awan_Short	SPAC323.02c.1:exon:3	442	SPAC323.02c.1:exon:4-SPAC323.02c.1:exon:2	SPAC323.02c.1:exon:4-SPAC323.02c.1:exon:3	UUAAGAU	19	1	CUGCCAU	53	1		0	0	0	0	150	109	127	149	SPAC323.02c.1:exon:3-SPAC323.02c.1:exon:2	AACUAAC	UGCUAAC	No	643	No	YES	No	No
SPCC14G10.04_int_2_3	1	1	0	0	0	1	1	1	A	GACUGUUAACA	230	1	Awan_Short	SPCC14G10.04.1:exon:3	53	SPCC14G10.04.1:exon:2-SPCC14G10.04.1:exon:4	SPCC14G10.04.1:exon:2-SPCC14G10.04.1:exon:3	CUGUUAA	230	1		NA	NA		0	0	2	0	104	71	74	125	SPCC14G10.04.1:exon:3-SPCC14G10.04.1:exon:4	UACUAAC	UACUAAC	No	429	YES	YES	YES	No
SPAC22G7.02_int_5_6	1	1	0	0	0	1	1	1	A	CAAACUAAUAC	14	1	Awan_Short	SPAC22G7.02.1:exon:6	96	SPAC22G7.02.1:exon:5-SPAC22G7.02.1:exon:7	SPAC22G7.02.1:exon:5-SPAC22G7.02.1:exon:6	AACUAAU	14	1		NA	NA		0	0	0	0	31	19	29	61	SPAC22G7.02.1:exon:6-SPAC22G7.02.1:exon:7	UAUUAAC	UACUGAU	No	180	YES	No	No	No
SPBC1703.12_int_2_3	1	1	0	0	0	1	1	1	A	AUUUCUAACGA	9	1	Awan_Short	SPBC1703.12.1:exon:3	14	SPBC1703.12.1:exon:2-SPBC1703.12.1:exon:4	SPBC1703.12.1:exon:2-SPBC1703.12.1:exon:3	UUCUAAC	9	1		NA	NA		0	0	0	0	1	0	1	1	SPBC1703.12.1:exon:3-SPBC1703.12.1:exon:4	CUCUAAC	UUCUAAC	YES	120	YES	No	No	No
SPBC1703.10_int_2_4	6	3	3	0	0	4	1	2	A	GGUUCCGAGGC	21	6	Awan_Short;Awan_Long	SPBC1703.10.1:exon:3;SPBC1703.10.1:exon:4	145	SPBC1703.10.1:exon:2-SPBC1703.10.1:exon:5	SPBC1703.10.1:exon:2-SPBC1703.10.1:exon:3	UUCCGAG	21	6		NA	NA		0	0	0	0	1849	978	2226	3026	SPBC1703.10.1:exon:4-SPBC1703.10.1:exon:5	UGCUAAC	GGCUAAU	No	355	No	No	No	No
SPCC576.05_int_1_2	3	3	0	0	0	2	2	1	A;A	UUUAGUUAGCA;AGUUAGCAGCA	46;43	2;1	Awan_Short	SPCC576.05.1:exon:2	244	SPCC576.05.1:exon:1-SPCC576.05.1:exon:3	SPCC576.05.1:exon:1-SPCC576.05.1:exon:2	UAGUUAG	46	2	UUAGCAG	43	1		1	0	0	0	17	11	27	43	SPCC576.05.1:exon:2-SPCC576.05.1:exon:3	UACUAAU	UACUAAC	No	566	No	YES	YES	No
SPBC6B1.09c_int_1_4	1	1	0	0	0	1	1	1	A	CCAGCUAAUAU	12	1	Awan_Short	SPBC6B1.09c.1:exon:5;SPBC6B1.09c.1:exon:4	238	SPBC6B1.09c.1:exon:6-SPBC6B1.09c.1:exon:3	SPBC6B1.09c.1:exon:6-SPBC6B1.09c.1:exon:5	AGCUAAU	12	1		NA	NA		0	0	0	0	8	2	7	7	SPBC6B1.09c.1:exon:4-SPBC6B1.09c.1:exon:3	UAUCAAC	AGCUAAU	YES	384	YES	No	No	No
SPAC23H3.04_int_1_2	1	1	0	0	0	1	1	1	A	CAGUGCUAACA	11	1	Awan_Short	SPAC23H3.04.1:exon:2	193	SPAC23H3.04.1:exon:1-SPAC23H3.04.1:exon:3	SPAC23H3.04.1:exon:1-SPAC23H3.04.1:exon:2	GUGCUAA	11	1		NA	NA		0	0	0	0	4	4	7	12	SPAC23H3.04.1:exon:2-SPAC23H3.04.1:exon:3	NA	UGCUAAC	No	283	No	No	No	No
SPAC4G9.14_int_1_2	1	1	0	0	0	1	1	1	A	CUAUGCAAGAU	22	1	Awan_Short	SPAC4G9.14.1:exon:2	275	SPAC4G9.14.1:exon:1-SPAC4G9.14.1:exon:3	SPAC4G9.14.1:exon:1-SPAC4G9.14.1:exon:2	AUGCAAG	22	1		NA	NA		0	0	0	0	26	22	33	29	SPAC4G9.14.1:exon:2-SPAC4G9.14.1:exon:3	GUUUGAU	UACUAAC	No	417	YES	No	No	No
SPAC3A12.05c_int_1_2	2	2	0	0	0	1	1	1	A	UUCUUCAAUGC	37	2	Awan_Short	SPAC3A12.05c.1:exon:3	122	SPAC3A12.05c.1:exon:4-SPAC3A12.05c.1:exon:2	SPAC3A12.05c.1:exon:4-SPAC3A12.05c.1:exon:3	CUUCAAU	37	2		NA	NA		0	0	0	0	0	0	0	0	SPAC3A12.05c.1:exon:3-SPAC3A12.05c.1:exon:2	AACUAAU	UACUAAC	No	253	No	No	No	No
SPAC16.01_int_1_2	2	2	0	0	0	2	2	1	A;A	GCACGAUACGC;UUGCACGAUAC	64;66	1;1	Awan_Short	SPAC16.01.1:exon:2	79	SPAC16.01.1:exon:1-SPAC16.01.1:exon:3	SPAC16.01.1:exon:1-SPAC16.01.1:exon:2	GCACGAU	66	1	ACGAUAC	64	1		0	0	0	0	17	8	16	23	SPAC16.01.1:exon:2-SPAC16.01.1:exon:3	GCCUAAU	UACUAAC	No	279	YES	YES	No	YES
SPBC19C2.14_int_1_2	1	1	0	0	0	1	1	1	A	UUUACUUACAC	11	1	Awan_Short	SPBC19C2.14.1:exon:2	60	SPBC19C2.14.1:exon:1-SPBC19C2.14.1:exon:3	SPBC19C2.14.1:exon:1-SPBC19C2.14.1:exon:2	UACUUAC	11	1		NA	NA		0	0	0	0	62	55	54	99	SPBC19C2.14.1:exon:2-SPBC19C2.14.1:exon:3	AACUAAU	CACUAAU	No	160	No	No	No	No
SPCC16C4.01_int_1_3	1	1	0	0	0	1	1	1	A	UGAAGCUAGUC	19	1	Awan_Short	SPCC16C4.01.1:exon:2;SPCC16C4.01.1:exon:3	328	SPCC16C4.01.1:exon:1-SPCC16C4.01.1:exon:4	SPCC16C4.01.1:exon:1-SPCC16C4.01.1:exon:2	AAGCUAG	19	1		NA	NA		0	0	0	0	6	8	8	7	SPCC16C4.01.1:exon:3-SPCC16C4.01.1:exon:4	AUCUAAC	GACUAAC	No	491	No	No	No	No
SPAC1002.07c_int_1_2	1	1	0	0	0	1	1	1	A	CAUAGCAAGAU	25	1	Awan_Short	SPAC1002.07c.1:exon:5	119	SPAC1002.07c.1:exon:6-SPAC1002.07c.1:exon:4	SPAC1002.07c.1:exon:6-SPAC1002.07c.1:exon:5	UAGCAAG	25	1		NA	NA		0	0	0	0	45	30	35	69	SPAC1002.07c.1:exon:5-SPAC1002.07c.1:exon:4	GACUAAU	UUUUAAC	No	261	YES	YES	No	No
SPBC83.15_int_2_4	3	0	3	0	0	1	1	1	A	CACUCAUAUUG	15	3	Awan_Long	SPBC83.15.1:exon:3;SPBC83.15.1:exon:4	638	SPBC83.15.1:exon:2-SPBC83.15.1:exon:5	SPBC83.15.1:exon:2-SPBC83.15.1:exon:3	CUCAUAU	15	3		NA	NA		0	0	0	0	112	107	158	211	SPBC83.15.1:exon:4-SPBC83.15.1:exon:5	CACUGAU	UAUUGAC	No	920	No	YES	No	No
SPCC1919.03c_int_2_3	1	1	0	0	0	1	1	1	A	UGUUUGCAAUA	58	1	Awan_Short	SPCC1919.03c.1:exon:3	103	SPCC1919.03c.1:exon:4-SPCC1919.03c.1:exon:2	SPCC1919.03c.1:exon:4-SPCC1919.03c.1:exon:3	UUUGCAA	58	1		NA	NA		0	0	0	0	20	15	14	36	SPCC1919.03c.1:exon:3-SPCC1919.03c.1:exon:2	UGCUAAC	AUUUAAU	No	369	YES	No	No	No
SPCC16C4.06c_int_1_2	1	1	0	0	0	1	1	1	A	AGAAGCAAAGA	39	1	Awan_Short	SPCC16C4.06c.1:exon:2	1530	SPCC16C4.06c.1:five_prime_UTR:2-SPCC16C4.06c.1:exon:1	SPCC16C4.06c.1:five_prime_UTR:2-SPCC16C4.06c.1:exon:2	AAGCAAA	39	1		NA	NA		0	0	0	0	4	0	2	5	SPCC16C4.06c.1:exon:2-SPCC16C4.06c.1:exon:1	UAUUAAU	UGCUAAC	No	1688	No	No	No	No
SPBC19C7.10_int_1_2	2	2	0	0	0	2	1	1	A	GAAACUAAUAU	9	2	Awan_Short	SPBC19C7.10.1:exon:2	32	SPBC19C7.10.1:exon:1-SPBC19C7.10.1:exon:3	SPBC19C7.10.1:exon:1-SPBC19C7.10.1:exon:2	AACUAAU	9	2		NA	NA		1	0	0	0	48	28	42	52	SPBC19C7.10.1:exon:2-SPBC19C7.10.1:exon:3	GACUAAU	AACUAAU	YES	108	YES	YES	YES	No
SPAC1952.13_int_1_2	2	1	1	0	0	2	2	2	A;A	AUACGGUAUCA;GUGCAAUAUUU	74;91	1;1	Awan_Long;Awan_Short	SPAC1952.13.1:exon:2	282	SPAC1952.13.1:exon:1-SPAC1952.13.1:exon:3	SPAC1952.13.1:exon:1-SPAC1952.13.1:exon:2	GCAAUAU	91	1	ACGGUAU	74	1		1	0	0	0	35	41	30	56	SPAC1952.13.1:exon:2-SPAC1952.13.1:exon:3	UGCUAAC	UACUAAC	No	500	No	No	YES	No
SPCC1840.04_int_1_2	1	1	0	0	0	1	1	1	A	CUUGCUAAAAC	12	1	Awan_Short	SPCC1840.04.1:exon:2	60	SPCC1840.04.1:exon:1-SPCC1840.04.1:exon:3	SPCC1840.04.1:exon:1-SPCC1840.04.1:exon:2	UGCUAAA	12	1		NA	NA		0	0	0	0	7	3	4	6	SPCC1840.04.1:exon:2-SPCC1840.04.1:exon:3	UAUUAAC	GGUUGAU	No	147	YES	No	No	YES
SPBC530.06c_int_1_2	2	2	0	0	0	2	1	1	A	UGUACUAAUAC	21	2	Awan_Short	SPBC530.06c.1:exon:2	1812	SPBC530.06c.1:exon:3-SPBC530.06c.1:exon:1	SPBC530.06c.1:exon:3-SPBC530.06c.1:exon:2	UACUAAU	21	2		NA	NA		0	0	0	0	12	11	29	44	SPBC530.06c.1:exon:2-SPBC530.06c.1:exon:1	NA	UACUAAU	YES	2000	No	No	No	No
SPCP1E11.08_int_1_2	1	1	0	0	0	1	1	1	A	GUGGUGAAGUU	86	1	Awan_Short	SPCP1E11.08.1:exon:2	120	SPCP1E11.08.1:exon:1-SPCP1E11.08.1:exon:3	SPCP1E11.08.1:exon:1-SPCP1E11.08.1:exon:2	GGUGAAG	86	1		NA	NA		0	0	0	0	32	18	31	35	SPCP1E11.08.1:exon:2-SPCP1E11.08.1:exon:3	UAUUAAC	UACUAAC	No	311	No	No	No	No
SPCC338.05c_int_3_4	1	1	0	0	0	1	1	1	A	CAUCCUAACUU	13	1	Awan_Short	SPCC338.05c.1:exon:4	80	SPCC338.05c.1:exon:3-SPCC338.05c.1:exon:5	SPCC338.05c.1:exon:3-SPCC338.05c.1:exon:4	UCCUAAC	13	1		NA	NA		0	0	0	0	46	29	26	44	SPCC338.05c.1:exon:4-SPCC338.05c.1:exon:5	UACUAAC	UCCUAAC	YES	307	No	No	No	No
SPBC28F2.12_int_2_5	2	2	0	0	0	2	1	1	A	AUAGCUAACAC	11	2	Awan_Short	SPBC28F2.12.1:exon:4;SPBC28F2.12.1:exon:5	136	SPBC28F2.12.1:exon:3-SPBC28F2.12.1:exon:6	SPBC28F2.12.1:exon:3-SPBC28F2.12.1:exon:4	AGCUAAC	11	2		NA	NA		1	0	0	0	145	106	196	388	SPBC28F2.12.1:exon:5-SPBC28F2.12.1:exon:6	NA	AGCUAAC	YES	267	YES	YES	YES	No
SPBC3B9.13c_int_1_2	1	1	0	0	0	1	1	1	A	CACAUAGAGUC	96	1	Awan_Short	SPBC3B9.13c.1:exon:2	240	SPBC3B9.13c.1:exon:3-SPBC3B9.13c.1:exon:1	SPBC3B9.13c.1:exon:3-SPBC3B9.13c.1:exon:2	CAUAGAG	96	1		NA	NA		0	0	1	0	1580	966	1891	3039	SPBC3B9.13c.1:exon:2-SPBC3B9.13c.1:exon:1	UACUAAC	UAUUAAC	No	496	No	YES	YES	No
SPCC74.02c_int_2_3	2	1	1	0	0	2	1	2	A	UGUAGCGAGUG	85	2	Awan_Short;Awan_Long	SPCC74.02c.1:exon:2	211	SPCC74.02c.1:exon:3-SPCC74.02c.1:exon:1	SPCC74.02c.1:exon:3-SPCC74.02c.1:exon:2	UAGCGAG	85	2		NA	NA		0	0	0	0	2	4	4	7	SPCC74.02c.1:exon:2-SPCC74.02c.1:exon:1	UGCUAAU	UACUAAU	No	489	YES	No	No	No
SPAC27E2.10c_int_1_2	1	1	0	0	0	1	1	1	A	CUUUUCUAAUU	71	1	Awan_Short	SPAC27E2.10c.1:exon:5	65	SPAC27E2.10c.1:exon:6-SPAC27E2.10c.1:exon:4	SPAC27E2.10c.1:exon:6-SPAC27E2.10c.1:exon:5	UUUCUAA	71	1		NA	NA		0	0	0	0	2	2	0	7	SPAC27E2.10c.1:exon:5-SPAC27E2.10c.1:exon:4	UUCUAAC	UACUAAU	No	267	YES	No	No	No
SPBC337.09_int_1_2	1	1	0	0	0	1	1	1	A	UUUCCAAAAUC	30	1	Awan_Short	SPBC337.09.1:exon:2	91	SPBC337.09.1:exon:1-SPBC337.09.1:exon:3	SPBC337.09.1:exon:1-SPBC337.09.1:exon:2	UCCAAAA	30	1		NA	NA		0	0	0	0	234	215	285	412	SPBC337.09.1:exon:2-SPBC337.09.1:exon:3	UGCUGAC	GUCUAAC	No	266	No	No	No	No
SPBC28F2.12_int_1_2	3	3	0	0	0	3	1	1	A	UUUACUAACAG	10	3	Awan_Short	SPBC28F2.12.1:exon:2	26	SPBC28F2.12.1:exon:1-SPBC28F2.12.1:exon:3	SPBC28F2.12.1:exon:1-SPBC28F2.12.1:exon:2	UACUAAC	10	3		NA	NA		0	0	0	0	23	30	25	39	SPBC28F2.12.1:exon:2-SPBC28F2.12.1:exon:3	UACUAAU	UACUAAC	YES	101	No	YES	No	No
SPBC28F2.12_int_1_3	1	1	0	0	0	1	1	1	A	AUCACUUAUCG	11	1	Awan_Short	SPBC28F2.12.1:exon:2;SPBC28F2.12.1:exon:3	99	SPBC28F2.12.1:exon:1-SPBC28F2.12.1:exon:4	SPBC28F2.12.1:exon:1-SPBC28F2.12.1:exon:2	CACUUAU	11	1		NA	NA		0	0	0	0	23	30	25	39	SPBC28F2.12.1:exon:3-SPBC28F2.12.1:exon:4	UACUAAU	NA	No	173	No	YES	No	No
SPAC19B12.12c_int_1_2	1	1	0	0	0	1	1	1	A	AAUUUGCAACA	61	1	Awan_Short	SPAC19B12.12c.1:exon:2	349	SPAC19B12.12c.1:exon:3-SPAC19B12.12c.1:exon:1	SPAC19B12.12c.1:exon:3-SPAC19B12.12c.1:exon:2	UUUGCAA	61	1		NA	NA		0	0	0	0	0	0	0	0	SPAC19B12.12c.1:exon:2-SPAC19B12.12c.1:exon:1	UGCUAAC	UACUGAC	No	528	YES	No	No	No
SPBC25H2.11c_int_2_3	1	1	0	0	0	1	1	1	A	AAAACUAAUAC	8	1	Awan_Short	SPBC25H2.11c.1:exon:3	39	SPBC25H2.11c.1:exon:2-SPBC25H2.11c.1:exon:4	SPBC25H2.11c.1:exon:2-SPBC25H2.11c.1:exon:3	AACUAAU	8	1		NA	NA		0	0	0	0	13	7	14	12	SPBC25H2.11c.1:exon:3-SPBC25H2.11c.1:exon:4	AAUUAAC	AACUAAU	YES	145	No	No	No	No
SPCC613.08_int_1_2	1	1	0	0	0	1	1	1	A	ACACUCGAGUG	41	1	Awan_Short	SPCC613.08.1:exon:2	212	SPCC613.08.1:exon:1-SPCC613.08.1:exon:3	SPCC613.08.1:exon:1-SPCC613.08.1:exon:2	ACUCGAG	41	1		NA	NA		0	0	0	0	223	147	431	561	SPCC613.08.1:exon:2-SPCC613.08.1:exon:3	AACUAAU	AGCUAAC	No	387	YES	No	No	No
SPCC777.10c_int_1_3	1	1	0	0	0	1	1	1	A	CUUUUUGAGAC	35	1	Awan_Short	SPCC777.10c.1:exon:4;SPCC777.10c.1:exon:3	185	SPCC777.10c.1:exon:5-SPCC777.10c.1:exon:2	SPCC777.10c.1:exon:5-SPCC777.10c.1:exon:4	UUUUGAG	35	1		NA	NA		0	0	0	0	6	3	3	7	SPCC777.10c.1:exon:3-SPCC777.10c.1:exon:2	UACUAAC	GAUUAAC	No	514	No	No	No	No
SPCC188.08c_int_1_2	1	1	0	0	0	1	1	1	A	AUCUCGGACCA	24	1	Awan_Short	SPCC188.08c.1:exon:2	103	SPCC188.08c.1:exon:3-SPCC188.08c.1:exon:1	SPCC188.08c.1:exon:3-SPCC188.08c.1:exon:2	CUCGGAC	24	1		NA	NA		0	0	0	0	22	15	24	33	SPCC188.08c.1:exon:2-SPCC188.08c.1:exon:1	UACUAAC	UUCUAAC	No	233	No	No	No	No
SPAC22F3.03c_int_1_2	1	1	0	0	0	1	1	1	A	ACAAUAUAGCA	44	1	Awan_Short	SPAC22F3.03c.1:exon:2	99	SPAC22F3.03c.1:exon:1-SPAC22F3.03c.1:exon:3	SPAC22F3.03c.1:exon:1-SPAC22F3.03c.1:exon:2	AAUAUAG	44	1		NA	NA		0	0	0	0	1	3	0	3	SPAC22F3.03c.1:exon:2-SPAC22F3.03c.1:exon:3	UUUUGAC	UAUUAAU	No	237	YES	No	No	No
SPBC16H5.05c_int_1_2	1	1	0	0	0	1	1	1	A	UCGACUAAUCU	9	1	Awan_Short	SPBC16H5.05c.1:exon:1	53	SPBC16H5.05c.1:five_prime_UTR:1-SPBC16H5.05c.1:exon:2	SPBC16H5.05c.1:five_prime_UTR:1-SPBC16H5.05c.1:exon:1	GACUAAU	9	1		NA	NA		0	0	0	0	0	0	0	0	SPBC16H5.05c.1:exon:1-SPBC16H5.05c.1:exon:2	UACUAAC	GACUAAU	YES	141	YES	No	No	No
SPAC23H4.16c_int_1_2	1	1	0	0	0	1	1	1	A	UGUUUCGAUAC	90	1	Awan_Short	SPAC23H4.16c.1:exon:2	165	SPAC23H4.16c.1:exon:1-SPAC23H4.16c.1:exon:3	SPAC23H4.16c.1:exon:1-SPAC23H4.16c.1:exon:2	UUUCGAU	90	1		NA	NA		0	0	0	0	7	7	6	17	SPAC23H4.16c.1:exon:2-SPAC23H4.16c.1:exon:3	CUCUAAC	UACUAAC	No	347	No	No	No	No
SPBP8B7.16c_int_1_2	1	1	0	0	0	1	1	1	A	AUUAUUGAUAC	49	1	Awan_Short	SPBP8B7.16c.1:exon:2	1232	SPBP8B7.16c.1:exon:3-SPBP8B7.16c.1:exon:1	SPBP8B7.16c.1:exon:3-SPBP8B7.16c.1:exon:2	UAUUGAU	49	1		NA	NA		0	0	0	0	17	39	88	91	SPBP8B7.16c.1:exon:2-SPBP8B7.16c.1:exon:1	UACUAAC	UACUGAU	No	2027	No	No	No	No
SPAC22F3.05c_int_4_5	1	0	1	0	0	1	1	1	A	CAAGCUAACAA	13	1	Awan_Long	SPAC22F3.05c.1:exon:5	81	SPAC22F3.05c.1:exon:4-SPAC22F3.05c.1:exon:6	SPAC22F3.05c.1:exon:4-SPAC22F3.05c.1:exon:5	AGCUAAC	13	1		NA	NA		0	1	1	0	4	1	6	12	SPAC22F3.05c.1:exon:5-SPAC22F3.05c.1:exon:6	UCUUAAC	AGCUAAC	YES	161	No	YES	YES	YES
SPAC17G8.04c_int_2_3	12	0	12	0	0	5	1	1	A	AAGAAGCAAUU	23	12	Awan_Long	SPAC17G8.04c.1:exon:2	177	SPAC17G8.04c.1:exon:3-SPAC17G8.04c.1:exon:1	SPAC17G8.04c.1:exon:3-SPAC17G8.04c.1:exon:2	GAAGCAA	23	12		NA	NA		0	0	0	0	120	84	170	237	SPAC17G8.04c.1:exon:2-SPAC17G8.04c.1:exon:1	UUUUAAC	UAUUAAU	No	347	No	YES	No	No
SPAC6F12.13c_int_1_2	1	1	0	0	0	1	1	1	A	CAUUGAAACCC	19	1	Awan_Short	SPAC6F12.13c.1:exon:2	120	SPAC6F12.13c.1:five_prime_UTR:1-SPAC6F12.13c.1:exon:1	SPAC6F12.13c.1:five_prime_UTR:1-SPAC6F12.13c.1:exon:2	UUGAAAC	19	1		NA	NA		0	0	0	0	93	80	70	120	SPAC6F12.13c.1:exon:2-SPAC6F12.13c.1:exon:1	GACUAAC	CCCUAAC	No	493	No	YES	No	No
SPBC27B12.08_int_2_3	1	0	1	0	0	1	1	1	A	AUAAUUAACCU	10	1	Awan_Long	SPBC27B12.08.1:exon:3	49	SPBC27B12.08.1:exon:2-SPBC27B12.08.1:exon:4	SPBC27B12.08.1:exon:2-SPBC27B12.08.1:exon:3	AAUUAAC	10	1		NA	NA		0	0	0	0	16	7	9	26	SPBC27B12.08.1:exon:3-SPBC27B12.08.1:exon:4	AACUAAC	CCUUAAU	No	136	No	No	No	No
SPCC126.05c_int_1_2	2	0	2	0	0	1	1	1	A	UUCCAAGAUAC	117	2	Awan_Long	SPCC126.05c.1:exon:3	434	SPCC126.05c.1:exon:4-SPCC126.05c.1:exon:2	SPCC126.05c.1:exon:4-SPCC126.05c.1:exon:3	CCAAGAU	117	2		NA	NA		0	0	0	0	85	56	120	139	SPCC126.05c.1:exon:3-SPCC126.05c.1:exon:2	GUUUAAC	UUCUAAC	No	649	No	No	No	No
SPBC660.16_int_2_3	1	0	1	0	0	1	1	1	A	UUAUUCCACUG	451	1	Awan_Long	SPBC660.16.1:exon:3	64	SPBC660.16.1:exon:2-SPBC660.16.1:exon:4	SPBC660.16.1:exon:2-SPBC660.16.1:exon:3	AUUCCAC	451	1		NA	NA		0	0	0	0	0	0	0	0	SPBC660.16.1:exon:3-SPBC660.16.1:exon:4	UAUUAAC	UGCUAAC	No	1046	No	No	No	No
SPAC824.06_int_1_2	1	0	1	0	0	1	1	1	A	AAUGCUAAUGA	10	1	Awan_Long	SPAC824.06.1:exon:2	48	SPAC824.06.1:exon:1-SPAC824.06.1:exon:3	SPAC824.06.1:exon:1-SPAC824.06.1:exon:2	UGCUAAU	10	1		NA	NA		0	0	0	0	95	61	89	153	SPAC824.06.1:exon:2-SPAC824.06.1:exon:3	AACUAAC	UGCUAAU	YES	148	No	No	No	No
SPAC1952.04c_int_1_3	3	0	3	0	0	1	1	1	A	AUUGAGUACAU	171	3	Awan_Long	SPAC1952.04c.1:exon:3;SPAC1952.04c.1:exon:2	85	SPAC1952.04c.1:exon:4-SPAC1952.04c.1:exon:1	SPAC1952.04c.1:exon:4-SPAC1952.04c.1:exon:3	UGAGUAC	171	3		NA	NA		0	0	0	0	2	2	2	4	SPAC1952.04c.1:exon:2-SPAC1952.04c.1:exon:1	UGCUAAC	UGCUAAU	No	487	No	No	No	No
SPAC30D11.06c_int_1_2	1	0	1	0	0	1	1	1	A	GUUAAUGAGGC	46	1	Awan_Long	SPAC30D11.06c.1:exon:2	88	SPAC30D11.06c.1:exon:1-SPAC30D11.06c.1:exon:3	SPAC30D11.06c.1:exon:1-SPAC30D11.06c.1:exon:2	UAAUGAG	46	1		NA	NA		0	0	0	0	24	16	67	58	SPAC30D11.06c.1:exon:2-SPAC30D11.06c.1:exon:3	UACUAAU	UUCUAAC	No	351	YES	No	No	No
SPAC8E11.07c_int_1_2	1	0	1	0	0	1	1	1	A	UUAGCGUAUCU	51	1	Awan_Long	SPAC8E11.07c.1:exon:2	87	SPAC8E11.07c.1:exon:1-SPAC8E11.07c.1:exon:3	SPAC8E11.07c.1:exon:1-SPAC8E11.07c.1:exon:2	AGCGUAU	51	1		NA	NA		0	0	0	0	99	73	175	198	SPAC8E11.07c.1:exon:2-SPAC8E11.07c.1:exon:3	UUCUGAC	UACUGAC	No	302	No	YES	No	No
SPAC6B12.15_int_1_2	2	0	2	0	0	2	2	1	A;A	AAUCACCAUAU;AGCAAGGAAUG	101;168	1;1	Awan_Long	SPAC6B12.15.1:exon:2	399	SPAC6B12.15.1:exon:1-SPAC6B12.15.1:exon:3	SPAC6B12.15.1:exon:1-SPAC6B12.15.1:exon:2	CAAGGAA	168	1	UCACCAU	101	1		0	0	0	0	1909	1215	2460	4101	SPAC6B12.15.1:exon:2-SPAC6B12.15.1:exon:3	UUCUAAC	UGCUAAC	No	849	YES	YES	No	No
SPAC8C9.05_int_2_3	1	0	1	0	0	1	1	1	A	UUCUCUAAUAA	11	1	Awan_Long	SPAC8C9.05.1:exon:3	29	SPAC8C9.05.1:exon:2-SPAC8C9.05.1:exon:4	SPAC8C9.05.1:exon:2-SPAC8C9.05.1:exon:3	CUCUAAU	11	1		NA	NA		0	0	0	0	7	3	9	4	SPAC8C9.05.1:exon:3-SPAC8C9.05.1:exon:4	UUCUAAU	CUCUAAU	YES	189	YES	No	No	No
SPBC1685.10_int_1_2	1	0	1	0	0	1	1	1	A	UGAACUCAAAG	28	1	Awan_Long	SPBC1685.10.1:exon:2	93	SPBC1685.10.1:exon:1-SPBC1685.10.1:exon:3	SPBC1685.10.1:exon:1-SPBC1685.10.1:exon:2	AACUCAA	28	1		NA	NA		0	0	0	0	9343	7644	19758	28813	SPBC1685.10.1:exon:2-SPBC1685.10.1:exon:3	CACUAAC	UGCUAAC	No	335	No	YES	No	No
SPBC725.08_int_2_3	1	0	1	0	0	1	1	1	A	UUUUCUAACAA	13	1	Awan_Long	SPBC725.08.1:exon:3	31	SPBC725.08.1:exon:2-SPBC725.08.1:exon:4	SPBC725.08.1:exon:2-SPBC725.08.1:exon:3	UUCUAAC	13	1		NA	NA		0	0	0	0	57	61	94	160	SPBC725.08.1:exon:3-SPBC725.08.1:exon:4	UAUUAAC	UUCUAAC	YES	156	YES	YES	No	No
SPBC31F10.16_int_1_2	2	0	2	0	0	1	1	1	A	UAUUGAAACGU	36	2	Awan_Long	SPBC31F10.16.1:exon:2	127	SPBC31F10.16.1:exon:1-SPBC31F10.16.1:exon:3	SPBC31F10.16.1:exon:1-SPBC31F10.16.1:exon:2	UUGAAAC	36	2		NA	NA		0	0	0	0	10	7	9	8	SPBC31F10.16.1:exon:2-SPBC31F10.16.1:exon:3	CAAUGAC	UAUUAAC	No	321	YES	No	No	No
SPBC1703.04_int_1_2	4	0	4	0	0	1	1	1	A	UUCAUAAAGUU	41	4	Awan_Long	SPBC1703.04.1:exon:2	138	SPBC1703.04.1:exon:1-SPBC1703.04.1:exon:3	SPBC1703.04.1:exon:1-SPBC1703.04.1:exon:2	CAUAAAG	41	4		NA	NA		0	1	0	0	2	1	2	3	SPBC1703.04.1:exon:2-SPBC1703.04.1:exon:3	AACUAAU	UUUUAAC	No	331	No	No	YES	No
SPAP27G11.12_int_2_3	1	0	1	0	0	1	1	1	A	UUUUGCUAACU	16	1	Awan_Long	SPAP27G11.12.1:exon:3	33	SPAP27G11.12.1:exon:2-SPAP27G11.12.1:exon:4	SPAP27G11.12.1:exon:2-SPAP27G11.12.1:exon:3	UUGCUAA	16	1		NA	NA		0	1	0	1	53	35	59	70	SPAP27G11.12.1:exon:3-SPAP27G11.12.1:exon:4	UACUAAC	AACUAAU	No	235	No	No	YES	No
SPCC830.10_int_2_3	1	0	1	0	0	1	1	1	A	UUAUCGGAGCA	22	1	Awan_Long	SPCC830.10.1:exon:3	65	SPCC830.10.1:exon:2-SPCC830.10.1:exon:4	SPCC830.10.1:exon:2-SPCC830.10.1:exon:3	AUCGGAG	22	1		NA	NA		0	0	0	0	35	17	44	71	SPCC830.10.1:exon:3-SPCC830.10.1:exon:4	CGCUAAC	CGCUAAU	No	258	YES	YES	No	No
SPAC977.18_int_1_2	1	0	1	0	0	1	1	1	A	AUUAGCGACUC	141	1	Awan_Long	SPAC977.18.1:exon:2	146	SPAC977.18.1:exon:3-SPAC977.18.1:exon:1	SPAC977.18.1:exon:3-SPAC977.18.1:exon:2	UAGCGAC	141	1		NA	NA		0	0	0	0	9	12	2	0	SPAC977.18.1:exon:2-SPAC977.18.1:exon:1	UGCUAAC	UGCUAAU	No	605	No	No	No	No
SPAC1002.07c_int_4_5	1	0	1	0	0	1	1	1	A	UUUUUAUAUGG	117	1	Awan_Long	SPAC1002.07c.1:exon:2	111	SPAC1002.07c.1:exon:3-SPAC1002.07c.1:exon:1	SPAC1002.07c.1:exon:3-SPAC1002.07c.1:exon:2	UUUAUAU	117	1		NA	NA		0	0	0	0	67	64	38	102	SPAC1002.07c.1:exon:2-SPAC1002.07c.1:exon:1	UACUAAU	GUCUGAU	No	416	No	YES	No	No
SPBC28E12.03_int_1_2	1	0	1	0	0	1	1	1	A	CGUUGGGAUUU	116	1	Awan_Long	SPBC28E12.03.1:exon:2	56	SPBC28E12.03.1:exon:1-SPBC28E12.03.1:exon:3	SPBC28E12.03.1:exon:1-SPBC28E12.03.1:exon:2	UUGGGAU	116	1		NA	NA		0	0	0	0	21	8	20	32	SPBC28E12.03.1:exon:2-SPBC28E12.03.1:exon:3	UACUAAC	UACUAAU	No	335	No	YES	No	No
SPCC1682.01_int_1_3	1	0	1	0	0	1	1	1	A	GAUAUCGAGUG	19	1	Awan_Long	SPCC1682.01.1:exon:2;SPCC1682.01.1:exon:3	135	SPCC1682.01.1:exon:1-SPCC1682.01.1:exon:4	SPCC1682.01.1:exon:1-SPCC1682.01.1:exon:2	UAUCGAG	19	1		NA	NA		0	0	0	0	21	25	28	37	SPCC1682.01.1:exon:3-SPCC1682.01.1:exon:4	UUUUAAU	UGCUAAC	No	266	No	YES	No	No
SPAC18B11.08c_int_2_3	1	0	1	0	0	1	1	1	A	GAUGUUAACAU	12	1	Awan_Long	SPAC18B11.08c.1:exon:3	90	SPAC18B11.08c.1:exon:2-SPAC18B11.08c.1:exon:4	SPAC18B11.08c.1:exon:2-SPAC18B11.08c.1:exon:3	UGUUAAC	12	1		NA	NA		0	0	0	1	48	46	76	84	SPAC18B11.08c.1:exon:3-SPAC18B11.08c.1:exon:4	UGUUAAC	UCCUAAU	No	187	No	No	YES	No
SPBC3B9.08c_int_5_6	1	0	1	0	0	1	1	1	A	GAAUGCUAACU	12	1	Awan_Long	SPBC3B9.08c.1:exon:2	88	SPBC3B9.08c.1:exon:3-SPBC3B9.08c.1:exon:1	SPBC3B9.08c.1:exon:3-SPBC3B9.08c.1:exon:2	AUGCUAA	12	1		NA	NA		0	0	0	0	213	193	272	467	SPBC3B9.08c.1:exon:2-SPBC3B9.08c.1:exon:1	AGCUAAC	AACUGAC	No	186	YES	YES	No	No
SPBC2F12.05c_int_2_3	1	0	1	0	0	1	1	1	A	UAUUUGAAUGC	28	1	Awan_Long	SPBC2F12.05c.1:exon:3	173	SPBC2F12.05c.1:exon:2-SPBC2F12.05c.1:exon:4	SPBC2F12.05c.1:exon:2-SPBC2F12.05c.1:exon:3	UUUGAAU	28	1		NA	NA		0	0	0	0	2	2	1	3	SPBC2F12.05c.1:exon:3-SPBC2F12.05c.1:exon:4	UACUGAC	AAUUAAC	No	479	No	YES	No	No
SPAC732.01_int_2_3	1	0	1	0	0	1	1	1	A	AUCACUAAUAU	11	1	Awan_Long	SPAC732.01.1:exon:3	110	SPAC732.01.1:exon:2-SPAC732.01.1:exon:4	SPAC732.01.1:exon:2-SPAC732.01.1:exon:3	CACUAAU	11	1		NA	NA		0	0	2	1	2	1	11	12	SPAC732.01.1:exon:3-SPAC732.01.1:exon:4	GAUUAAU	CACUAAU	YES	197	No	No	YES	No
SPBC19G7.17_int_3_4	1	0	1	0	0	1	1	1	A	UUUCCCGAUUU	44	1	Awan_Long	SPBC19G7.17.1:exon:4	33	SPBC19G7.17.1:exon:3-SPBC19G7.17.1:exon:5	SPBC19G7.17.1:exon:3-SPBC19G7.17.1:exon:4	UCCCGAU	44	1		NA	NA		4	0	1	5	805	374	576	833	SPBC19G7.17.1:exon:4-SPBC19G7.17.1:exon:5	UACUAAU	UGCUAAU	No	252	YES	YES	YES	No
SPCC1322.16_int_1_3	2	0	2	0	0	2	1	1	A	UAUUAACAAUA	13	2	Awan_Long	SPCC1322.16.1:exon:2;SPCC1322.16.1:exon:3	336	SPCC1322.16.1:exon:1-SPCC1322.16.1:exon:4	SPCC1322.16.1:exon:1-SPCC1322.16.1:exon:2	UUAACAA	13	2		NA	NA		0	0	0	0	26	27	24	36	SPCC1322.16.1:exon:3-SPCC1322.16.1:exon:4	UGUUAAC	UAUUAAC	No	592	No	YES	No	No
SPBC8D2.02c_int_1_3	1	0	1	0	0	1	1	1	A	UUUCCAAAUUA	110	1	Awan_Long	SPBC8D2.02c.1:exon:3;SPBC8D2.02c.1:exon:2	620	SPBC8D2.02c.1:five_prime_UTR:2-SPBC8D2.02c.1:exon:1	SPBC8D2.02c.1:five_prime_UTR:2-SPBC8D2.02c.1:exon:3	UCCAAAU	110	1		NA	NA		0	0	0	0	0	0	0	0	SPBC8D2.02c.1:exon:2-SPBC8D2.02c.1:exon:1	ACCUGAU	CUUUAAC	No	895	No	YES	No	No
SPBC19G7.06_int_2_4	1	0	1	0	0	1	1	1	A	CUUGGGGAGAA	6	1	Awan_Long	SPBC19G7.06.1:exon:2;SPBC19G7.06.1:exon:3	231	SPBC19G7.06.1:exon:1-SPBC19G7.06.1:exon:4	SPBC19G7.06.1:exon:1-SPBC19G7.06.1:exon:2	UGGGGAG	6	1		NA	NA		0	2	0	0	7	12	15	21	SPBC19G7.06.1:exon:3-SPBC19G7.06.1:exon:4	CGCUAAC	UACUAAC	No	370	No	YES	YES	No
