# Supplementary material for: LaSSO, a strategy for genome-wide mapping of intronic lariats and branch points using RNA-seq
Source: HighWire-hosted journal article supplement (doi:10.1101/gr.166819.113), 2014-04-07
Supplement: Supplemental_Table11.xlsx [file Supplemental_Table11.xlsx]

## Sheet: HumanTableCannonical_sup.txt
Supplemental Table 11. Branch sites identified by LaSSO using human dataset (accession number GSE30611)
Branch-point index: the distance of branch-point from 3' splice acceptor site
BP-Branch-point; BS-Branch-site; Lar-Lariat; Int-Intron; sur_exons-flanking exons 5'-3' exons are separated by an underscore, multiple flanking exons by a semi-colon; LarSeq:number of unique sequence reads that straddle the lariat
Chromosome	start	end	width	strand	gene	sur_exons	LarReads	LarSeq	NoBranches	BranchpointLetters	BranchSites	BranchPointIdx	BranchPointReads	SeqPerBranch	PrimaryBS_Seq_LaSSO	PrimaryBP_idx_LaSSO	PrimaryBP_reads_LaSSO	PrimaryBP_SeqPerBranch_LaSSO	SecondaryBS_Seq_LaSSO	SecondaryBP_idx_LaSSO	SecondaryBP_reads_LaSSO	SecondaryBP_SeqPerBranch_LaSSO	AdditionalBP_LaSSO	intStartLetters	intEndLetters
7	128040259	128040386	128	-1	ENSG00000106348	ENSE00001910715;ENSE00000720959;ENSE00001955614_ENSE00003213123;ENSE00003106626	2	1	1	A	CAGAGGGAGGC	37	2	1	GAGGGAG	37	2	1		NA	NA	NA	NA	GT	AG
7	128218088	128218943	856	1	ENSG00000242588	ENSE00002450995_ENSE00002523931	1	1	1	A	AAACUGUAUUU	23	1	1	ACUGUAU	23	1	1		NA	NA	NA	NA	GT	AG
7	121721650	121722841	1192	-1	ENSG00000008311	ENSE00003089464;ENSE00003195862;ENSE00001623803_ENSE00003084112;ENSE00003225441	1	1	1	A	UUUAUAUACUG	24	1	1	UAUAUAC	24	1	1		NA	NA	NA	NA	GT	AG
7	148487534	148489817	2284	1	ENSG00000055130	ENSE00000909634_ENSE00000909635	2	1	1	A	UGUUUCCAUGC	48	2	1	UUUCCAU	48	2	1		NA	NA	NA	NA	GT	AG
7	156975023	156976571	1549	1	ENSG00000009335	ENSE00000382151_ENSE00000730750	3	1	1	A	UUAACUGAUUG	14	3	1	AACUGAU	14	3	1		NA	NA	NA	NA	GT	AG
7	150915960	150916149	190	-1	ENSG00000033050	ENSE00003226225;ENSE00003133467_ENSE00003122710;ENSE00002995733	1	1	1	A	AUACUCCAAGC	23	1	1	ACUCCAA	23	1	1		NA	NA	NA	NA	GT	AG
7	155534801	155537654	2854	1	ENSG00000184863	ENSE00002995889;ENSE00003067426_ENSE00001512994;ENSE00001031340	2	1	1	A	AAAGUAAACCG	23	2	1	AGUAAAC	23	2	1		NA	NA	NA	NA	GT	AG
7	151262470	151262805	336	-1	ENSG00000106617	ENSE00002989584;ENSE00003091095_ENSE00003031377;ENSE00003076025	1	1	1	A	UUUUCUAACAU	21	1	1	UUCUAAC	21	1	1		NA	NA	NA	NA	GT	AG
7	157177703	157178234	532	1	ENSG00000105993	ENSE00003043084;ENSE00003076635_ENSE00001856517;ENSE00003059005;ENSE00001659601;ENSE00003065499;ENSE00001848285	1	1	1	A	CUUUACCAGAA	33	1	1	UUACCAG	33	1	1		NA	NA	NA	NA	GT	AG
8	68139834	68140197	364	-1	ENSG00000066777	ENSE00002983482;ENSE00003125014;ENSE00002126555_ENSE00001597011	2	1	1	A	GAUAUUAAUUA	32	2	1	UAUUAAU	32	2	1		NA	NA	NA	NA	GT	AG
8	103273488	103274142	655	-1	ENSG00000104517	ENSE00003223063;ENSE00003032329;ENSE00002130496_ENSE00003210970;ENSE00003195626	3	1	1	A	AAAUAGCACUG	19	3	1	AUAGCAC	19	3	1		NA	NA	NA	NA	GT	AG
8	133894858	133895058	201	1	ENSG00000042832	ENSE00003093091;ENSE00003100984_ENSE00000703759;ENSE00002116948	1	1	1	A	AUUGUUGACAC	34	1	1	UGUUGAC	34	1	1		NA	NA	NA	NA	GT	AG
8	134262787	134266781	3995	-1	ENSG00000104419	ENSE00003138566;ENSE00002126243;ENSE00002997143;ENSE00002122182_ENSE00003111172;ENSE00003196876	3	1	1	A	AGGCAUUAUUA	104	3	1	GCAUUAU	104	3	1		NA	NA	NA	NA	GT	AG
8	126114389	126114558	170	1	ENSG00000156831	ENSE00002103091;ENSE00001237234_ENSE00003075755;ENSE00003111257;ENSE00002114646	1	1	1	A	CUGACUUACGA	33	1	1	GACUUAC	33	1	1		NA	NA	NA	NA	GT	AG
9	35711392	35711591	200	-1	ENSG00000137076	ENSE00000928264_ENSE00000928263	4	1	1	A	ACAAUGCAUUG	23	4	1	AAUGCAU	23	4	1		NA	NA	NA	NA	GT	AG
9	77746740	77748209	1470	1	ENSG00000134996	ENSE00000803850_ENSE00000707175	4	1	1	A	AAGUGAAAGCU	42	4	1	GUGAAAG	42	4	1		NA	NA	NA	NA	GT	AG
9	88934586	88937239	2654	-1	ENSG00000083223	ENSE00000983022_ENSE00001171584	6	1	1	A	CCGGCUUAUUU	33	6	1	GGCUUAU	33	6	1		NA	NA	NA	NA	GT	AG
9	99537129	99538281	1153	-1	ENSG00000081386	ENSE00001037171_ENSE00000895705	1	1	1	A	AUCUCUCAUGA	22	1	1	CUCUCAU	22	1	1		NA	NA	NA	NA	GT	AG
9	95014168	95015643	1476	-1	ENSG00000196305	ENSE00003167971;ENSE00003103445_ENSE00003048905;ENSE00002993113	1	1	1	A	CAGUUUAAUGU	28	1	1	GUUUAAU	28	1	1		NA	NA	NA	NA	GT	AG
9	127999434	128000419	986	-1	ENSG00000044574	ENSE00000727547_ENSE00001246525	1	1	1	A	ACAACUAACAA	27	1	1	AACUAAC	27	1	1		NA	NA	NA	NA	GT	AG
9	128001107	128001219	113	-1	ENSG00000044574	ENSE00000983647_ENSE00000727542	6	1	1	A	CACAGUAACCA	18	6	1	CAGUAAC	18	6	1		NA	NA	NA	NA	GT	AG
9	131285620	131285870	251	1	ENSG00000119392	ENSE00003031574;ENSE00003030783_ENSE00003024250;ENSE00003029175	1	1	1	A	AGAGAGAAGUC	23	1	1	AGAGAAG	23	1	1		NA	NA	NA	NA	GT	AG
9	130952747	130952966	220	-1	ENSG00000148337	ENSE00003202386;ENSE00003143544;ENSE00001459101;ENSE00001802863;ENSE00001916121;ENSE00001839648_ENSE00001848636	1	1	1	A	AGGUCUGACUU	18	1	1	GUCUGAC	18	1	1		NA	NA	NA	NA	GT	TC
10	5495524	5496227	704	1	ENSG00000173848	ENSE00001235344_ENSE00003190875;ENSE00002999987	1	1	1	A	CGGUCAUAACA	40	1	1	GUCAUAA	40	1	1		NA	NA	NA	NA	GT	AG
10	26822455	26825002	2548	1	ENSG00000077420	ENSE00001318728_ENSE00001301327	2	1	1	A	GAAUCUCACUU	8	2	1	AUCUCAC	8	2	1		NA	NA	NA	NA	GT	AG
10	70666764	70670062	3299	1	ENSG00000107625	ENSE00003196334;ENSE00003045893_ENSE00003009347;ENSE00003056480	1	1	1	A	AUAAAUUAUUU	28	1	1	AAAUUAU	28	1	1		NA	NA	NA	NA	GT	AG
10	70509023	70509280	258	1	ENSG00000060339	ENSE00003023112;ENSE00003142142_ENSE00003210062;ENSE00003174423	1	1	1	A	UUUAGAAAAAU	14	1	1	UAGAAAA	14	1	1		NA	NA	NA	NA	GT	AG
10	69957236	69959124	1889	1	ENSG00000138347	ENSE00000933629_ENSE00000933630	1	1	1	A	GUGCCUCAGCU	21	1	1	GCCUCAG	21	1	1		NA	NA	NA	NA	GT	AG
10	75830579	75830732	154	1	ENSG00000035403	ENSE00002495268_ENSE00001024245	12	3	1	A	CCAUGUGAUUG	27	12	3	AUGUGAU	27	12	3		NA	NA	NA	NA	GT	AG
10	89096647	89101998	5352	-1	ENSG00000223482	ENSE00001732102;ENSE00001730383;ENSE00001752728;ENSE00001788118;ENSE00001802422_ENSE00002461438	1	1	1	A	AAUCUUGAGAC	29	1	1	UCUUGAG	29	1	1		NA	NA	NA	NA	GT	AG
10	86132226	86133374	1149	1	ENSG00000107771	ENSE00001795795_ENSE00001422352;ENSE00001687607	1	1	1	A	UUUUGUGAAUC	26	1	1	UUGUGAA	26	1	1		NA	NA	NA	NA	GT	AG
10	99226343	99226532	190	-1	ENSG00000155229	ENSE00003041607;ENSE00003066439_ENSE00003162613;ENSE00003091759;ENSE00001923371	1	1	1	A	AAAGAUGAGAU	26	1	1	AGAUGAG	26	1	1		NA	NA	NA	NA	GT	AG
10	101371216	101372299	1084	-1	ENSG00000155287	ENSE00003142771;ENSE00001915228;ENSE00001873125;ENSE00003013109_ENSE00001924817;ENSE00001857027	1	1	1	A	CUCACUCAUAC	28	1	1	CACUCAU	28	1	1		NA	NA	NA	NA	GT	GG
10	120833090	120833258	169	-1	ENSG00000107581	ENSE00003017538;ENSE00003188530_ENSE00000987840	1	1	1	A	UUGGAUUAGNN	2	1	1	GGAUUAG	2	1	1		NA	NA	NA	NA	GT	AG
10	120820841	120824910	4070	-1	ENSG00000107581	ENSE00000987845_ENSE00000987847	3	1	1	A	GGCAGUUACAU	25	3	1	CAGUUAC	25	3	1		NA	NA	NA	NA	GT	AG
10	115366042	115368172	2131	-1	ENSG00000197893	ENSE00001262032_ENSE00001261885	3	1	1	A	AGCACUUAUCU	38	3	1	CACUUAU	38	3	1		NA	NA	NA	NA	GT	AG
10	121600473	121601983	1511	-1	ENSG00000197771	ENSE00003121150;ENSE00003120266_ENSE00003051179;ENSE00003158161	1	1	1	A	CUUAUUGAUUG	21	1	1	UAUUGAU	21	1	1		NA	NA	NA	NA	GT	AG
11	12247918	12248571	654	1	ENSG00000133816	ENSE00003151344;ENSE00002993735;ENSE00002187863_ENSE00003092991;ENSE00002978983;ENSE00002178348;ENSE00002144652	1	1	1	A	UCCCAACAGNN	2	1	1	CCAACAG	2	1	1		NA	NA	NA	NA	GT	AG
1	92754709	92755754	1046	-1	ENSG00000174842	ENSE00001067534_ENSE00001207026	2	2	1	A	AGCGACAACUU	18	2	2	CGACAAC	18	2	2		NA	NA	NA	NA	GT	AG
1	94362377	94363394	1018	-1	ENSG00000023909	ENSE00003130427;ENSE00003141562_ENSE00003182254;ENSE00003174878	1	1	1	A	UGUAAGCAUUU	32	1	1	UAAGCAU	32	1	1		NA	NA	NA	NA	GT	AG
1	86047968	86048098	131	1	ENSG00000142871	ENSE00000956872_ENSE00000956873	1	1	1	A	GCCUCUGAGAA	28	1	1	CUCUGAG	28	1	1		NA	NA	NA	NA	GT	AG
1	93300471	93301746	1276	1	ENSG00000122406	ENSE00002995139;ENSE00003166301_ENSE00002260159;ENSE00001887909;ENSE00001293943;ENSE00001877600	1	1	1	A	UUUGAAUAAUU	36	1	1	UGAAUAA	36	1	1		NA	NA	NA	NA	GT	AG
1	110946659	110948939	2281	-1	ENSG00000134248	ENSE00003002293;ENSE00001942933;ENSE00002995620_ENSE00003095882;ENSE00003031031;ENSE00002194022	3	1	1	A	UCAGGUGACAU	24	3	1	AGGUGAC	24	3	1		NA	NA	NA	NA	GT	AG
1	111984227	111984646	420	-1	ENSG00000116455	ENSE00003086230;ENSE00001670309;ENSE00003223812_ENSE00001868896	1	1	1	A	GCCCCUCAUCA	22	1	1	CCCUCAU	22	1	1		NA	NA	NA	NA	GT	AG
1	145439926	145440037	112	1	ENSG00000117289	ENSE00000787511;ENSE00001837689_ENSE00000787510;ENSE00001950648	4	1	1	A	GCAUCUCAAAA	29	4	1	AUCUCAA	29	4	1		NA	NA	NA	NA	GT	AG
11	33373812	33374637	826	1	ENSG00000110422	ENSE00000709795_ENSE00002144799;ENSE00001479517;ENSE00001709073	1	1	1	A	GUUAUUCAGUC	29	1	1	UAUUCAG	29	1	1		NA	NA	NA	NA	GT	AG
11	65766869	65767037	169	-1	ENSG00000175376	ENSE00002995263;ENSE00002979128_ENSE00003203693;ENSE00003088374;ENSE00002201876;ENSE00002167605	5	1	1	A	CUUUCUGACUU	24	5	1	UUCUGAC	24	5	1		NA	NA	NA	NA	GT	AG
11	65688134	65688354	221	1	ENSG00000175550	ENSE00003157847;ENSE00001472370;ENSE00003054848;ENSE00002177080_ENSE00002996036;ENSE00003121198	2	1	1	A	CACUCCCAGUG	53	2	1	CUCCCAG	53	2	1		NA	NA	NA	NA	GT	AG
11	64697854	64697952	99	1	ENSG00000068971	ENSE00000730323_ENSE00000730321	1	1	1	A	UCACCUGAGCC	32	1	1	ACCUGAG	32	1	1		NA	NA	NA	NA	GT	AG
11	64536602	64536694	93	-1	ENSG00000168066	ENSE00003148832;ENSE00003206060_ENSE00003138782;ENSE00002979890	2	1	1	A	CCCUUGCAUUG	24	2	1	CUUGCAU	24	2	1		NA	NA	NA	NA	GT	AG
11	63669803	63670072	270	1	ENSG00000072518	ENSE00001582516_ENSE00001196436	1	1	1	A	UGGCCUUACCC	28	1	1	GCCUUAC	28	1	1		NA	NA	NA	NA	GT	AG
11	77602509	77602726	218	-1	ENSG00000149262	ENSE00003210167;ENSE00003096590_ENSE00003176647;ENSE00003085701	2	1	1	A	UAAAAUCAUAG	24	2	1	AAAUCAU	24	2	1		NA	NA	NA	NA	GT	AG
11	67857348	67864485	7138	-1	ENSG00000110721	ENSE00003194938;ENSE00003222769_ENSE00002181663	1	1	1	A	UAGCUAUAAAU	1248	1	1	GCUAUAA	1248	1	1		NA	NA	NA	NA	GT	AG
11	95826682	96074546	247865	-1	ENSG00000184384	ENSE00002141976;ENSE00001775727_ENSE00001771343	1	1	1	A	AUUUCUUAUUU	32	1	1	UUCUUAU	32	1	1		NA	NA	NA	NA	GT	AG
11	95718807	95724683	5877	-1	ENSG00000184384	ENSE00001290465_ENSE00001312273	1	1	1	A	AUGCAACAUAA	28	1	1	GCAACAU	28	1	1		NA	NA	NA	NA	GT	AG
11	118065133	118067449	2317	-1	ENSG00000160593	ENSE00003222375;ENSE00002200164;ENSE00003063547_ENSE00001557461;ENSE00002169932;ENSE00002170108;ENSE00002168304;ENSE00002166068;ENSE00002154737;ENSE00002160772	1	1	1	A	ACUUCUUACAA	38	1	1	UUCUUAC	38	1	1		NA	NA	NA	NA	GT	AG
11	118948777	118948854	78	1	ENSG00000160695	ENSE00003029271;ENSE00003037935_ENSE00002143716	1	1	1	A	CCCACUCAUUC	6	1	1	CACUCAU	6	1	1		NA	NA	NA	NA	GT	AG
12	416256	416619	364	-1	ENSG00000073614	ENSE00001693829;ENSE00002251890_ENSE00001791408;ENSE00002266200	2	1	1	A	GCUGUUCAUCU	24	2	1	UGUUCAU	24	2	1		NA	NA	NA	NA	GC	AG
12	6778356	6779925	1570	-1	ENSG00000126746	ENSE00001595476_ENSE00001734868	1	1	1	A	UGUAUUCAUUC	26	1	1	UAUUCAU	26	1	1		NA	NA	NA	NA	GT	AG
12	32861159	32862477	1319	1	ENSG00000087470	ENSE00003184108;ENSE00003152348;ENSE00002995500_ENSE00002368504	7	2	1	A	UUAGCCAAAAG	1208	7	2	AGCCAAA	1208	7	2		NA	NA	NA	NA	GT	AG
12	46757787	46758171	385	-1	ENSG00000134294	ENSE00003157811;ENSE00003015698;ENSE00002410992;ENSE00002369806_ENSE00003127347;ENSE00003219466	2	1	1	A	CAGAUUAAGUA	25	2	1	GAUUAAG	25	2	1		NA	NA	NA	NA	GT	AG
12	56718278	56718364	87	-1	ENSG00000135473	ENSE00003026501;ENSE00003098009_ENSE00003021448;ENSE00003018576;ENSE00002420908;ENSE00002375141	1	1	1	A	CCUUUCCACCA	16	1	1	UUUCCAC	16	1	1		NA	NA	NA	NA	GT	AG
12	47181815	47182310	496	-1	ENSG00000139209	ENSE00000937066_ENSE00000937067	2	1	1	A	CUUUUUCAAGN	3	2	1	UUUUCAA	3	2	1		NA	NA	NA	NA	GT	AG
12	53344691	53345264	574	1	ENSG00000111057	ENSE00003205973;ENSE00002325230;ENSE00003012995_ENSE00003069288;ENSE00003102038	1	1	1	A	CACCUUUAGNN	2	1	1	CCUUUAG	2	1	1		NA	NA	NA	NA	GC	AG
12	57036365	57036456	92	-1	ENSG00000110955	ENSE00000939435;ENSE00002371666;ENSE00002347931;ENSE00002418491_ENSE00003097905;ENSE00003008717	1	1	1	A	ACACCUAAGAC	19	1	1	ACCUAAG	19	1	1		NA	NA	NA	NA	GT	AG
12	57574263	57574449	187	1	ENSG00000123384	ENSE00001290948_ENSE00001314212	3	3	1	A	GGGUCUCAUCC	20	3	3	GUCUCAU	20	3	3		NA	NA	NA	NA	GT	AG
12	54797564	54797694	131	-1	ENSG00000161638	ENSE00003135252;ENSE00003223622;ENSE00002421762_ENSE00002426422;ENSE00001633552;ENSE00002356849	1	1	1	A	GACAGGCAGUU	29	1	1	CAGGCAG	29	1	1		NA	NA	NA	NA	GT	AG
12	49165757	49166077	321	-1	ENSG00000174233	ENSE00003222897;ENSE00003123924;ENSE00002429695_ENSE00001632940;ENSE00002351951;ENSE00002369212;ENSE00002328111	4	1	1	A	AUGGGUGAUGG	19	4	1	GGGUGAU	19	4	1		NA	NA	NA	NA	GT	AG
12	65082234	65085249	3016	1	ENSG00000153179	ENSE00001009314_ENSE00003055637;ENSE00003046064	2	1	1	A	CUCUGUAACAU	25	2	1	CUGUAAC	25	2	1		NA	NA	NA	NA	GT	AG
12	66718907	66724933	6027	1	ENSG00000127311	ENSE00003083724;ENSE00003051204;ENSE00002323571_ENSE00003167543;ENSE00003150626	1	1	1	A	AGUCUUCACAC	21	1	1	UCUUCAC	21	1	1		NA	NA	NA	NA	GT	AG
12	96717891	96728496	10606	-1	ENSG00000059758	ENSE00003109646;ENSE00003216144_ENSE00003145191;ENSE00003101239;ENSE00002378364	1	1	1	A	UGUACUAAUCU	100	1	1	UACUAAU	100	1	1		NA	NA	NA	NA	GT	AG
12	108082284	108082391	108	1	ENSG00000136045	ENSE00003001650;ENSE00002421044;ENSE00003095397_ENSE00003016743;ENSE00002992193	2	1	1	A	AGAAGGUAGCA	39	2	1	AAGGUAG	39	2	1		NA	NA	NA	NA	GT	AG
12	98995060	98995145	86	1	ENSG00000075415	ENSE00003059151;ENSE00003010779;ENSE00002400656_ENSE00003057568;ENSE00003086461;ENSE00003108071;ENSE00003108224;ENSE00002404816;ENSE00003144966;ENSE00002398767;ENSE00003153913;ENSE00002383250	1	1	1	A	UUUUUUCAUUU	24	1	1	UUUUCAU	24	1	1		NA	NA	NA	NA	GT	AG
12	120436541	120437564	1024	1	ENSG00000135127	ENSE00002203755_ENSE00002418046	3	1	1	A	AUUUAGUAAAC	190	3	1	UUAGUAA	190	3	1		NA	NA	NA	NA	GT	AG
12	122763490	122763574	85	-1	ENSG00000130779	ENSE00003193061;ENSE00003078205;ENSE00002260777;ENSE00002246348;ENSE00002250980_ENSE00003034073;ENSE00003043487	4	1	1	A	CAGCCUAAGCU	21	4	1	GCCUAAG	21	4	1		NA	NA	NA	NA	GT	AG
13	41894961	41897191	2231	1	ENSG00000172766	ENSE00003023770;ENSE00003013087_ENSE00003006923;ENSE00003135472	1	1	1	A	AAGUUAAAACU	14	1	1	GUUAAAA	14	1	1		NA	NA	NA	NA	GT	AG
13	39598694	39600413	1720	-1	ENSG00000120685	ENSE00001694373;ENSE00001845409_ENSE00002321112;ENSE00001919871;ENSE00001755865	1	1	1	A	UUCAAUUACCU	24	1	1	CAAUUAC	24	1	1		NA	NA	NA	NA	GT	AG
14	23378805	23380536	1732	-1	ENSG00000100461	ENSE00003135946;ENSE00003010309;ENSE00002517211_ENSE00003054243;ENSE00003074792;ENSE00002442339;ENSE00002498152	2	1	1	A	UGGUUUGAUUU	94	2	1	GUUUGAU	94	2	1		NA	NA	NA	NA	GT	AG
14	24739347	24739539	193	-1	ENSG00000100949	ENSE00002983434;ENSE00003166166;ENSE00002540257_ENSE00003066512;ENSE00002986494;ENSE00003184156;ENSE00002536891	3	1	1	A	AGCCCUGACCC	26	3	1	CCCUGAC	26	3	1		NA	NA	NA	NA	GT	AG
14	24901817	24901927	111	1	ENSG00000100441	ENSE00000654500_ENSE00000654501	1	1	1	A	GGUGCCAAGCC	34	1	1	UGCCAAG	34	1	1		NA	NA	NA	NA	GT	AG
14	23863533	23865492	1960	-1	ENSG00000197616	ENSE00001099747_ENSE00001099733	1	1	1	A	CUUUUAUAGUG	34	1	1	UUUAUAG	34	1	1		NA	NA	NA	NA	GT	AG
14	45571900	45576653	4754	1	ENSG00000185246	ENSE00003070900;ENSE00003218510_ENSE00003067645;ENSE00003027354	2	1	1	A	UGAUUCAAAUA	30	2	1	AUUCAAA	30	2	1		NA	NA	NA	NA	GT	AG
14	57689135	57696451	7317	-1	ENSG00000070367	ENSE00003147625;ENSE00003061311_ENSE00003026415;ENSE00002995820	1	1	1	A	AGACUUGAGGA	32	1	1	ACUUGAG	32	1	1		NA	NA	NA	NA	GT	AG
14	74974014	74974675	662	-1	ENSG00000119681	ENSE00000808175_ENSE00000808174	3	1	1	A	CCACAGCAGUG	49	3	1	ACAGCAG	49	3	1		NA	NA	NA	NA	GT	AG
14	95085806	95088677	2872	1	ENSG00000196136	ENSE00003101878;ENSE00003151389;ENSE00001822685_ENSE00003012021;ENSE00002502223;ENSE00003091469	1	1	1	A	UUCAGAUACUU	23	1	1	CAGAUAC	23	1	1		NA	NA	NA	NA	GT	AG
14	103804810	103805071	262	1	ENSG00000100664	ENSE00003194050;ENSE00003141392;ENSE00002572546_ENSE00003013129;ENSE00002541167;ENSE00002571894;ENSE00002561465;ENSE00003208625	1	1	1	A	CAUAAACAGNN	2	1	1	UAAACAG	2	1	1		NA	NA	NA	NA	GT	AG
15	39882225	39882716	492	1	ENSG00000137801	ENSE00000883769_ENSE00000883770	2	1	1	A	GCAACUGAAGC	30	2	1	AACUGAA	30	2	1		NA	NA	NA	NA	GT	AG
15	44057765	44058084	320	1	ENSG00000167004	ENSE00003202044;ENSE00003184578;ENSE00003013042_ENSE00003152286;ENSE00003215697	2	1	1	A	CCAGUUGAUAA	22	2	1	AGUUGAU	22	2	1		NA	NA	NA	NA	GT	AG
15	59064435	59080104	15670	1	ENSG00000128923	ENSE00001236746;ENSE00002560538;ENSE00002545617;ENSE00002537550_ENSE00000931475	1	1	1	A	AUUUUAUAGAA	23	1	1	UUUAUAG	23	1	1		NA	NA	NA	NA	GT	AG
15	91026826	91027451	626	1	ENSG00000140575	ENSE00000944020;ENSE00002538082_ENSE00003144541;ENSE00003069975	1	1	1	A	CAACUUCAUGU	46	1	1	ACUUCAU	46	1	1		NA	NA	NA	NA	GT	AG
15	85656679	85657103	425	1	ENSG00000073417	ENSE00002993783;ENSE00003018920_ENSE00003178611;ENSE00003168064;ENSE00002571286;ENSE00002538924	1	1	1	A	AUAAUGUAGNN	2	1	1	AAUGUAG	2	1	1		NA	NA	NA	NA	GT	AG
15	99452129	99454543	2415	1	ENSG00000140443	ENSE00003129734;ENSE00003082284_ENSE00003195009;ENSE00003054773;ENSE00002571491	4	1	1	A	GUCACUCACGG	22	4	1	CACUCAC	22	4	1		NA	NA	NA	NA	GT	AG
15	95019729	95019924	196	1	ENSG00000140563	ENSE00002429825_ENSE00003064232;ENSE00003162666	4	1	1	A	GACAGACAGAU	34	4	1	CAGACAG	34	4	1		NA	NA	NA	NA	GT	AG
1	169349848	169351299	1452	1	ENSG00000117475	ENSE00001304196_ENSE00001300742	2	1	1	A	UCUUACUAUGU	30	2	1	UUACUAU	30	2	1		NA	NA	NA	NA	GT	AG
1	159805946	159807706	1761	-1	ENSG00000188004	ENSE00003206965;ENSE00003115061_ENSE00001446324;ENSE00001948292	2	1	1	A	GCGUUUUAUGG	20	2	1	GUUUUAU	20	2	1		NA	NA	NA	NA	GT	AG
1	151236505	151237307	803	1	ENSG00000159352	ENSE00003002036;ENSE00003186917;ENSE00001836386_ENSE00003223170;ENSE00001940441;ENSE00003008692;ENSE00001863016	4	1	1	A	CUGGUUAACUC	29	4	1	GGUUAAC	29	4	1		NA	NA	NA	NA	GT	AG
1	154142946	154143124	179	-1	ENSG00000143549	ENSE00003001718;ENSE00003123854;ENSE00001868646;ENSE00002054958_ENSE00003136722;ENSE00003126949;ENSE00002083576;ENSE00002077919	2	1	1	A	GGUUCUGACUA	22	2	1	UUCUGAC	22	2	1		NA	NA	NA	NA	GT	AG
1	162536139	162546566	10428	1	ENSG00000117143	ENSE00001004734;ENSE00001445937_ENSE00000958805	1	1	1	A	UUUUGUGAUAC	22	1	1	UUGUGAU	22	1	1		NA	NA	NA	NA	GT	AG
1	156438092	156438571	480	-1	ENSG00000116604	ENSE00003217663;ENSE00003194080;ENSE00001855261_ENSE00003098742;ENSE00003182012;ENSE00002992551	1	1	1	A	AGAACUAAUAU	202	1	1	AACUAAU	202	1	1		NA	NA	NA	NA	GT	AG
1	150705622	150720252	14631	-1	ENSG00000163131	ENSE00003212963;ENSE00003066718_ENSE00001448522;ENSE00001874248;ENSE00001920184;ENSE00001911350	1	1	1	A	AUUUGUAAUUU	26	1	1	UUGUAAU	26	1	1		NA	NA	NA	NA	GT	AG
1	169099329	169100529	1201	1	ENSG00000143153	ENSE00001193529_ENSE00001193562;ENSE00002259156;ENSE00001445672	7	1	1	A	GCCAUUAAAAU	26	7	1	CAUUAAA	26	7	1		NA	NA	NA	NA	GT	AG
1	153636951	153637695	745	-1	ENSG00000143621	ENSE00001175619_ENSE00003122125;ENSE00003225883	2	1	1	A	AUGUUUCAUCC	29	2	1	GUUUCAU	29	2	1		NA	NA	NA	NA	GT	AG
1	154239045	154241232	2188	1	ENSG00000143569	ENSE00002998917;ENSE00003098707;ENSE00001932630_ENSE00001594242;ENSE00001919659	1	1	1	A	UUUGCUGAUCC	38	1	1	UGCUGAU	38	1	1		NA	NA	NA	NA	GT	AG
1	173835935	173836128	194	-1	ENSG00000234741	ENSE00001664078;ENSE00001742068;ENSE00001654917;ENSE00001640604_ENSE00001619916;ENSE00001696126;ENSE00001626020	2	1	1	A	GAGGUUCAUUC	37	2	1	GGUUCAU	37	2	1		NA	NA	NA	NA	GT	AG
1	182835721	182836095	375	1	ENSG00000135829	ENSE00001176794_ENSE00002213926	2	1	1	A	AUAGUUUAUUG	22	2	1	AGUUUAU	22	2	1		NA	NA	NA	NA	GT	AG
16	3807378	3807809	432	-1	ENSG00000005339	ENSE00001644140_ENSE00001699420	3	1	1	A	UAUUUUUAUAU	31	3	1	UUUUUAU	31	3	1		NA	NA	NA	NA	GT	AG
16	4921303	4922884	1582	1	ENSG00000118900	ENSE00000802209_ENSE00001145129	1	1	1	A	CAUGUACAGAU	27	1	1	UGUACAG	27	1	1		NA	NA	NA	NA	GT	AG
16	28123328	28124224	897	-1	ENSG00000169180	ENSE00003113594;ENSE00002598128;ENSE00003107233_ENSE00003141555;ENSE00002992031	1	1	1	A	GGCUCUGACCU	33	1	1	CUCUGAC	33	1	1		NA	NA	NA	NA	GT	AG
16	24567239	24567628	390	1	ENSG00000122257	ENSE00003013335;ENSE00003069329;ENSE00002588923_ENSE00002994163;ENSE00002618945;ENSE00003194996	1	1	1	A	AAAGAUAACUG	45	1	1	AGAUAAC	45	1	1		NA	NA	NA	NA	GT	AG
16	30676401	30676626	226	1	ENSG00000156860	ENSE00003205066;ENSE00003151026_ENSE00003094537;ENSE00003138138	1	1	1	A	CACCUGUACUA	23	1	1	CCUGUAC	23	1	1		NA	NA	NA	NA	GT	AG
16	31519200	31519394	195	-1	ENSG00000140688	ENSE00002576349;ENSE00001917041;ENSE00002603172;ENSE00002985382;ENSE00002592268;ENSE00003198742;ENSE00002620372_ENSE00003119790;ENSE00002987993	1	1	1	A	GCUUCUCACCC	23	1	1	UUCUCAC	23	1	1		NA	NA	NA	NA	GT	AG
1	21176024	21177750	1727	-1	ENSG00000075151	ENSE00001784396_ENSE00001690531	8	1	1	A	UAAUAGUAAUU	43	8	1	AUAGUAA	43	8	1		NA	NA	NA	NA	GT	AG
1	11308152	11313895	5744	-1	ENSG00000198793	ENSE00000743813_ENSE00000743812	1	1	1	A	CAUAAGUAAAG	32	1	1	UAAGUAA	32	1	1		NA	NA	NA	NA	GT	AG
1	6530416	6530565	150	-1	ENSG00000171680	ENSE00003088551;ENSE00003221416_ENSE00003157544;ENSE00003149948	1	1	1	A	CUCCCCUACGU	23	1	1	CCCCUAC	23	1	1		NA	NA	NA	NA	GT	AG
1	26230305	26231154	850	-1	ENSG00000117632	ENSE00003114355;ENSE00003097590_ENSE00003012826;ENSE00001910975;ENSE00003133844	2	1	1	A	AUAAUCAAUUC	7	2	1	AAUCAAU	7	2	1		NA	NA	NA	NA	GT	AG
1	28369162	28374893	5732	-1	ENSG00000158161	ENSE00003049367;ENSE00003005699_ENSE00003194504;ENSE00003088968	1	1	1	A	GGGGCUAAUGU	24	1	1	GGCUAAU	24	1	1		NA	NA	NA	NA	GT	AG
1	26361496	26361655	160	1	ENSG00000158008	ENSE00002986518;ENSE00003019324_ENSE00001462999	4	2	1	A	CCCGUUAAUGC	24	4	2	CGUUAAU	24	4	2		NA	NA	NA	NA	GT	AG
1	26582357	26584087	1731	1	ENSG00000130695	ENSE00001065299_ENSE00001065308	1	1	1	A	CUCUACCACUU	1010	1	1	CUACCAC	1010	1	1		NA	NA	NA	NA	GT	AG
3	25661554	25662172	619	-1	ENSG00000077097	ENSE00000997571_ENSE00000997564	1	1	1	A	AAGAAUCACUA	22	1	1	GAAUCAC	22	1	1		NA	NA	NA	NA	GT	AG
3	48463216	48463513	298	-1	ENSG00000164050	ENSE00001080898_ENSE00001080910	1	1	1	A	GAUAGACACUG	18	1	1	UAGACAC	18	1	1		NA	NA	NA	NA	GT	AG
3	47913591	47917174	3584	-1	ENSG00000047849	ENSE00001338202_ENSE00003014075;ENSE00003043876	1	1	1	A	AGGCCUCAUUC	22	1	1	GCCUCAU	22	1	1		NA	NA	NA	NA	GT	AG
3	53271938	53274266	2329	-1	ENSG00000163931	ENSE00003037026;ENSE00003173283_ENSE00001952674	1	1	1	A	UUUCCUUAUUU	26	1	1	UCCUUAU	26	1	1		NA	NA	NA	NA	GT	AG
3	52831947	52832585	639	1	ENSG00000162267	ENSE00002394019_ENSE00001865999	4	1	1	A	AGGGCUUAUCU	370	4	1	GGCUUAU	370	4	1		NA	NA	NA	NA	GT	AA
3	73113298	73114002	705	1	ENSG00000163605	ENSE00001076474;ENSE00001938815;ENSE00001944315_ENSE00001076473;ENSE00001902339;ENSE00001829145;ENSE00001950628	2	1	1	A	UUUAAAAAAAC	12	2	1	UAAAAAA	12	2	1		NA	NA	NA	NA	GT	AG
3	72428579	72495646	67068	-1	ENSG00000163602	ENSE00001930429_ENSE00001204363	1	1	1	A	GUGAUAUAUAU	20	1	1	GAUAUAU	20	1	1		NA	NA	NA	NA	GT	AG
3	101576304	101578161	1858	1	ENSG00000144802	ENSE00003144288;ENSE00003217716;ENSE00003141853;ENSE00001958418_ENSE00000967213;ENSE00003006546;ENSE00001886467;ENSE00003026709;ENSE00001879285	4	1	1	A	AAACCUCACAA	26	4	1	ACCUCAC	26	4	1		NA	NA	NA	NA	GT	AG
16	67979986	67980073	88	-1	ENSG00000124067	ENSE00003196706;ENSE00003172583;ENSE00003146007_ENSE00003009248;ENSE00003133009	1	1	1	A	ACCGCCCACCU	19	1	1	CGCCCAC	19	1	1		NA	NA	NA	NA	GT	AG
16	71983917	71984016	100	-1	ENSG00000187008	ENSE00003160423;ENSE00003021949_ENSE00003074818;ENSE00003029740	1	1	1	A	CCGAUGCAUAC	34	1	1	GAUGCAU	34	1	1		NA	NA	NA	NA	GT	AG
16	67692983	67693131	149	-1	ENSG00000102977	ENSE00000690346_ENSE00000690328	2	1	1	A	UUGACUCAUCC	23	2	1	GACUCAU	23	2	1		NA	NA	NA	NA	GT	AG
17	3728345	3729060	716	-1	ENSG00000074356	ENSE00003130075;ENSE00003052974_ENSE00003102454;ENSE00002648152;ENSE00003098905	4	1	1	A	AAUUUUUAUAU	27	4	1	UUUUUAU	27	4	1		NA	NA	NA	NA	GT	AG
16	76573750	76574599	850	1	ENSG00000152910	ENSE00003137931;ENSE00002290380;ENSE00002979819_ENSE00003220407;ENSE00003074333	1	1	1	A	AUUUUGUAGNN	2	1	1	UUUGUAG	2	1	1		NA	NA	NA	NA	GT	AG
17	8124828	8125610	783	-1	ENSG00000178977	ENSE00001235170_ENSE00001334684	1	1	1	A	GACGGGGAGAG	730	1	1	CGGGGAG	730	1	1		NA	NA	NA	NA	GT	AG
17	8416988	8417103	116	-1	ENSG00000133026	ENSE00000948828_ENSE00000948831	3	3	1	A	GAAUGAUAAAA	32	3	3	AUGAUAA	32	3	3		NA	NA	NA	NA	GT	AG
17	27241056	27244302	3247	-1	ENSG00000109118	ENSE00003196302;ENSE00003156870;ENSE00003208725_ENSE00003167931;ENSE00003023636	2	1	1	A	AUGUUGGAACU	42	2	1	GUUGGAA	42	2	1		NA	NA	NA	NA	GT	AG
17	26943528	26943635	108	-1	ENSG00000007202	ENSE00003173962;ENSE00003047896_ENSE00002898137;ENSE00002687300	1	1	1	A	AGCUGGUACAC	18	1	1	CUGGUAC	18	1	1		NA	NA	NA	NA	GT	AG
17	36909083	36909402	320	1	ENSG00000108294	ENSE00001339230;ENSE00002711097;ENSE00002694329_ENSE00003140636;ENSE00003214182	1	1	1	A	CGCGCUGACCC	24	1	1	CGCUGAC	24	1	1		NA	NA	NA	NA	GT	AG
17	37821723	37821968	246	1	ENSG00000173991	ENSE00001237768;ENSE00002719913_ENSE00000950649;ENSE00002726975	1	1	1	A	GGAGCUCACUG	22	1	1	AGCUCAC	22	1	1		NA	NA	NA	NA	GT	AG
17	46628544	46629388	845	-1	ENSG00000120093	ENSE00001942615;ENSE00001873025;ENSE00001308078;ENSE00001817851;ENSE00001828968_ENSE00001313825;ENSE00001919017;ENSE00001828025;ENSE00001957232;ENSE00001951921;ENSE00001901782;ENSE00001867320;ENSE00001930534	5	1	1	A	AGUAAUUAUCU	49	5	1	UAAUUAU	49	5	1		NA	NA	NA	NA	GT	AG
17	42288521	42288657	137	-1	ENSG00000108312	ENSE00000854242_ENSE00000854241	1	1	1	A	GGCAUGCAGCC	27	1	1	CAUGCAG	27	1	1		NA	NA	NA	NA	GT	AG
17	56593980	56595177	1198	-1	ENSG00000108389	ENSE00002722584;ENSE00001319690;ENSE00002712424;ENSE00002692259_ENSE00003011997;ENSE00003149717	1	1	1	A	GUCCUUUACUU	28	1	1	CCUUUAC	28	1	1		NA	NA	NA	NA	GT	AG
17	67181785	67183821	2037	-1	ENSG00000154263	ENSE00003060993;ENSE00003101610_ENSE00003006915;ENSE00003199138	5	1	1	A	UUUACUUAGNN	2	5	1	UACUUAG	2	5	1		NA	NA	NA	NA	GT	AG
17	65920706	65924470	3765	1	ENSG00000171634	ENSE00002534782_ENSE00002474914	3	1	1	A	UUGAUUCAUGU	26	3	1	GAUUCAU	26	3	1		NA	NA	NA	NA	GT	AG
17	65212052	65214710	2659	-1	ENSG00000198265	ENSE00003076780;ENSE00003104835_ENSE00003193963;ENSE00003183906;ENSE00002705174	3	1	1	A	AAUACUUAAUU	28	3	1	UACUUAA	28	3	1		NA	NA	NA	NA	GT	AG
18	9547951	9549194	1244	-1	ENSG00000154845	ENSE00003063923;ENSE00003157535_ENSE00001821957;ENSE00002719201;ENSE00002725248;ENSE00002706661	2	1	1	A	ACAUGUCAUUU	8	2	1	AUGUCAU	8	2	1		NA	NA	NA	NA	GT	AG
18	7080087	7080285	199	-1	ENSG00000101680	ENSE00003222870;ENSE00003079761_ENSE00003086048;ENSE00003066397	1	1	1	A	GGAAUUCAUGU	24	1	1	AAUUCAU	24	1	1		NA	NA	NA	NA	GC	AG
18	19757083	19761413	4331	1	ENSG00000141448	ENSE00000948602_ENSE00000948603	1	1	1	A	UUCCCCAAUUC	3527	1	1	CCCCAAU	3527	1	1		NA	NA	NA	NA	GT	AG
18	39584506	39593405	8900	1	ENSG00000078142	ENSE00001101386_ENSE00001101421	1	1	1	A	UUUCCUAAUAU	29	1	1	UCCUAAU	29	1	1		NA	NA	NA	NA	GT	AG
18	67498443	67499771	1329	-1	ENSG00000150637	ENSE00002704625_ENSE00002704494	2	1	1	A	CUGUUUGAGCU	31	2	1	GUUUGAG	31	2	1		NA	NA	NA	NA	GC	AG
18	47014937	47015728	792	-1	ENSG00000215472	ENSE00003175166_ENSE00002727019;ENSE00001703914	3	1	1	A	AAACUUAACAC	20	3	1	ACUUAAC	20	3	1		NA	NA	NA	NA	GT	AG
18	71793337	71796639	3303	-1	ENSG00000141665	ENSE00003108748;ENSE00003095071;ENSE00002700070_ENSE00003159733;ENSE00003180188	3	1	1	A	AAAGCUCACUU	37	3	1	AGCUCAC	37	3	1		NA	NA	NA	NA	GT	AG
19	3206025	3206149	125	1	ENSG00000125912	ENSE00000951269;ENSE00002854371_ENSE00003043175;ENSE00002825222;ENSE00003195262	1	1	1	A	UGGACUCAGGG	26	1	1	GACUCAG	26	1	1		NA	NA	NA	NA	GT	AG
19	10090724	10091323	600	-1	ENSG00000080573	ENSE00000675216_ENSE00001615960	1	1	1	A	GAUCAUGAUUU	19	1	1	UCAUGAU	19	1	1		NA	NA	NA	NA	GT	AG
19	3547546	3547845	300	-1	ENSG00000161091	ENSE00003046225;ENSE00003014838;ENSE00003217611_ENSE00003195147;ENSE00003126221;ENSE00003181454	1	1	1	A	CCCUGCCAGUC	25	1	1	CUGCCAG	25	1	1		NA	NA	NA	NA	GT	AG
19	18557291	18557557	267	-1	ENSG00000105656	ENSE00003063004;ENSE00003117084_ENSE00003167788;ENSE00003082273	1	1	1	A	UCCACUCAGUG	24	1	1	CACUCAG	24	1	1		NA	NA	NA	NA	GT	AG
19	17691715	17691985	271	1	ENSG00000130309	ENSE00000895576;ENSE00003099749_ENSE00003047586;ENSE00003141027	2	1	1	A	GCCCCUCACUC	22	2	1	CCCUCAC	22	2	1		NA	NA	NA	NA	GT	AG
19	37467270	37469905	2636	1	ENSG00000198453	ENSE00002845329_ENSE00001598566;ENSE00002853342	1	1	1	A	UGUAACUAUCU	24	1	1	UAACUAU	24	1	1		NA	NA	NA	NA	GT	AG
19	46355644	46355739	96	-1	ENSG00000125755	ENSE00003138623;ENSE00003032507_ENSE00003104178;ENSE00003073821	1	1	1	A	CUGAUCCACUU	22	1	1	GAUCCAC	22	1	1		NA	NA	NA	NA	GT	AG
19	41114276	41114389	114	1	ENSG00000090006	ENSE00003070158;ENSE00003089015_ENSE00003197971;ENSE00002990425;ENSE00003037319	1	1	1	A	GGGCUCCACUC	26	1	1	GCUCCAC	26	1	1		NA	NA	NA	NA	GT	AG
19	41810167	41811550	1384	1	ENSG00000105323	ENSE00002989235;ENSE00003099163_ENSE00003202655;ENSE00002994176	3	1	1	A	CUAUUUCACAG	4	3	1	AUUUCAC	4	3	1		NA	NA	NA	NA	GT	AG
19	51584961	51585831	871	-1	ENSG00000129437	ENSE00001769412_ENSE00000954890	2	1	1	A	UUUGCUCAUCU	35	2	1	UGCUCAU	35	2	1		NA	NA	NA	NA	GT	AG
19	40325454	40327195	1742	-1	ENSG00000105202	ENSE00003003289;ENSE00003192510;ENSE00003002195_ENSE00003082535;ENSE00003155940;ENSE00003119113;ENSE00003147009;ENSE00003130919	3	1	1	A	GUUGUAGACAU	24	3	1	UGUAGAC	24	3	1		NA	NA	NA	NA	GT	AG
19	45385622	45389193	3572	1	ENSG00000130202	ENSE00000893918;ENSE00002771968_ENSE00000893920	2	1	1	A	GGUCUUAAUCU	31	2	1	UCUUAAU	31	2	1		NA	NA	NA	NA	GT	AG
19	47279005	47280231	1227	-1	ENSG00000105281	ENSE00000714268_ENSE00001806597;ENSE00003144871;ENSE00003094825	1	1	1	A	CCCUCUCACCC	46	1	1	CUCUCAC	46	1	1		NA	NA	NA	NA	GT	AG
19	56300344	56300594	251	-1	ENSG00000179873	ENSE00003226095;ENSE00003102986_ENSE00003067862;ENSE00003144474	1	1	1	A	CCACCUUACCU	21	1	1	ACCUUAC	21	1	1		NA	NA	NA	NA	GT	AG
20	16506851	16509015	2165	-1	ENSG00000089177	ENSE00003041614;ENSE00003192650_ENSE00003077197;ENSE00003155136	2	1	1	A	GCUCUUUACAU	35	2	1	UCUUUAC	35	2	1		NA	NA	NA	NA	GC	AG
20	2819393	2819489	97	-1	ENSG00000132635	ENSE00003111359;ENSE00001191737;ENSE00003181955_ENSE00003174835;ENSE00003080836	1	1	1	A	CUUGCCCACCC	21	1	1	UGCCCAC	21	1	1		NA	NA	NA	NA	GT	AG
20	5098311	5099255	945	-1	ENSG00000132646	ENSE00001693283_ENSE00000906721	2	1	1	A	ACAAUUAACUU	28	2	1	AAUUAAC	28	2	1		NA	NA	NA	NA	GT	AG
20	34317288	34317383	96	-1	ENSG00000131051	ENSE00003051137;ENSE00002987849;ENSE00001827013_ENSE00003181228;ENSE00003010893	3	1	1	A	UUGGAUAACUU	26	3	1	GGAUAAC	26	3	1		NA	NA	NA	NA	GT	AG
1	198700856	198701428	573	1	ENSG00000081237	ENSE00003094512_ENSE00002981112	5	1	1	A	UUCUUUCAGNN	2	5	1	CUUUCAG	2	5	1		NA	NA	NA	NA	GT	AG
1	205689782	205693053	3272	-1	ENSG00000069275	ENSE00001133436_ENSE00001381812	1	1	1	A	UUCUUUAAUCA	32	1	1	CUUUAAU	32	1	1		NA	NA	NA	NA	GT	AG
1	201844065	201844279	215	1	ENSG00000198700	ENSE00001434944_ENSE00001434913	1	1	1	A	UGUCCUGACCC	29	1	1	UCCUGAC	29	1	1		NA	NA	NA	NA	GT	AG
1	204403737	204408062	4326	-1	ENSG00000133056	ENSE00001039882_ENSE00001039885	1	1	1	A	CAGCUUUAUGU	36	1	1	GCUUUAU	36	1	1		NA	NA	NA	NA	GT	AG
1	200822624	200823944	1321	1	ENSG00000118200	ENSE00000796434_ENSE00000796435	1	1	1	A	UUUAUUCAGGA	29	1	1	UAUUCAG	29	1	1		NA	NA	NA	NA	GT	AG
20	61522508	61523338	831	-1	ENSG00000101191	ENSE00000856524_ENSE00001174744;ENSE00001521407;ENSE00001521396	1	1	1	A	UUUCUUUAUGA	28	1	1	UCUUUAU	28	1	1		NA	NA	NA	NA	GT	AG
21	34967921	34968036	116	-1	ENSG00000205758	ENSE00003216387;ENSE00003004683_ENSE00001643192;ENSE00001436391;ENSE00001667525;ENSE00001690724;ENSE00001813881	1	1	1	A	UUUCCUUAAGU	13	1	1	UCCUUAA	13	1	1		NA	NA	NA	NA	AT	AC
21	45546001	45546780	780	1	ENSG00000241945	ENSE00003103734;ENSE00001888031;ENSE00003021802_ENSE00003108511;ENSE00001908491;ENSE00003065346	2	1	1	A	GAUCAUUAACG	20	2	1	UCAUUAA	20	2	1		NA	NA	NA	NA	GT	AG
22	36156080	36157248	1169	-1	ENSG00000100320	ENSE00001576597_ENSE00001580047	3	1	1	A	AGUUGAAAUUU	18	3	1	UUGAAAU	18	3	1		NA	NA	NA	NA	GT	GG
22	38021084	38021803	720	1	ENSG00000100083	ENSE00001286815;ENSE00001868466_ENSE00000653938;ENSE00001924775	1	1	1	A	ACUUGCCAGCC	22	1	1	UUGCCAG	22	1	1		NA	NA	NA	NA	GT	AG
22	38212329	38212573	245	1	ENSG00000100116	ENSE00000880223_ENSE00001225665;ENSE00001351315	3	1	1	A	UUCUGGCACGC	25	3	1	CUGGCAC	25	3	1		NA	NA	NA	NA	GT	AG
22	42991621	42992191	571	-1	ENSG00000100227	ENSE00003070880;ENSE00003151885_ENSE00003144186;ENSE00003021633	1	1	1	A	GUGUGGCAGNN	2	1	1	GUGGCAG	2	1	1		NA	NA	NA	NA	GT	AG
X	13722022	13726839	4818	1	ENSG00000123595	ENSE00001485582_ENSE00001822569;ENSE00000840432	9	1	1	A	GAAUGUAAUGG	22	9	1	AUGUAAU	22	9	1		NA	NA	NA	NA	GT	AG
22	46134720	46136248	1529	1	ENSG00000130638	ENSE00003003043;ENSE00003042229;ENSE00001523587_ENSE00003150418;ENSE00001844042;ENSE00003175209	3	1	1	A	GAAAAUGAAGU	22	3	1	AAAUGAA	22	3	1		NA	NA	NA	NA	GT	AG
X	40514313	40518478	4166	-1	ENSG00000180182	ENSE00003106259;ENSE00003051608_ENSE00001227662	4	1	1	A	AAUGUUUAUAU	36	4	1	UGUUUAU	36	4	1		NA	NA	NA	NA	GT	AG
X	41206705	41206892	188	1	ENSG00000215301	ENSE00003029490;ENSE00003184621_ENSE00001875435;ENSE00001938097;ENSE00001768187;ENSE00001788528	1	1	1	A	UUCAUUAAUUU	30	1	1	CAUUAAU	30	1	1		NA	NA	NA	NA	GT	AG
X	43591101	43591945	845	1	ENSG00000189221	ENSE00001382812_ENSE00001377890	2	1	1	A	GAUCUCGAUCU	29	2	1	UCUCGAU	29	2	1		NA	NA	NA	NA	GT	AG
X	41203076	41203282	207	1	ENSG00000215301	ENSE00003173813;ENSE00003128654_ENSE00003051305;ENSE00003012217;ENSE00003138255	1	1	1	A	UAGGUAGAGUU	30	1	1	GGUAGAG	30	1	1		NA	NA	NA	NA	GT	AG
X	54012383	54013510	1128	-1	ENSG00000172943	ENSE00001803249_ENSE00001625206;ENSE00001595956	1	1	1	A	AGGUGAUACAC	18	1	1	GUGAUAC	18	1	1		NA	NA	NA	NA	GT	AG
X	135080718	135081014	297	1	ENSG00000198689	ENSE00001434749_ENSE00001434602	1	1	1	A	UUAUUGAACAG	4	1	1	AUUGAAC	4	1	1		NA	NA	NA	NA	GT	AG
1	245021577	245022030	454	-1	ENSG00000153187	ENSE00003089116;ENSE00002991795;ENSE00001879291_ENSE00003066852;ENSE00003146175;ENSE00001672102;ENSE00001864017	1	1	1	A	GUGUAACAGNN	2	1	1	GUAACAG	2	1	1		NA	NA	NA	NA	GT	AG
2	11905860	11907888	2029	1	ENSG00000134324	ENSE00003121825;ENSE00003042289_ENSE00003021143;ENSE00003040431	1	1	1	A	UGAAGGCAGUU	35	1	1	AAGGCAG	35	1	1		NA	NA	NA	NA	GT	AG
2	29169366	29169465	100	1	ENSG00000163811	ENSE00001078509_ENSE00001178451;ENSE00001643177	3	1	1	A	GACCUUCAUGA	32	3	1	CCUUCAU	32	3	1		NA	NA	NA	NA	GT	AG
2	32679011	32688261	9251	1	ENSG00000115760	ENSE00001189810_ENSE00000743556	1	1	1	A	UUUCUUCAUCC	46	1	1	UCUUCAU	46	1	1		NA	NA	NA	NA	GT	AG
2	36764690	36771518	6829	1	ENSG00000150938	ENSE00001153778_ENSE00001153772	1	1	1	A	UUGAGAUAAAU	651	1	1	GAGAUAA	651	1	1		NA	NA	NA	NA	GT	AG
2	36704215	36706639	2425	1	ENSG00000150938	ENSE00000397108_ENSE00001153829	1	1	1	A	CAGUCUAACUC	25	1	1	GUCUAAC	25	1	1		NA	NA	NA	NA	GT	AG
2	73477045	73477433	389	1	ENSG00000135624	ENSE00000920803_ENSE00000920804	2	1	1	A	UGGUGGCAGAC	41	2	1	GUGGCAG	41	2	1		NA	NA	NA	NA	GT	AG
2	65478234	65480861	2628	1	ENSG00000138071	ENSE00000758608_ENSE00000758609	2	1	1	A	UGAUUUGACUU	34	2	1	AUUUGAC	34	2	1		NA	NA	NA	NA	GT	AG
2	71337253	71337892	640	-1	ENSG00000124370	ENSE00001837620_ENSE00001129607;ENSE00001764085	1	1	1	A	GAUCUCAAAUG	30	1	1	UCUCAAA	30	1	1		NA	NA	NA	NA	GT	AG
2	74597953	74598105	153	-1	ENSG00000204843	ENSE00002988645;ENSE00001829015;ENSE00003065845_ENSE00003073020;ENSE00003198695	2	2	1	A	CCCUCCCACCU	19	2	2	CUCCCAC	19	2	2		NA	NA	NA	NA	GT	AG
2	136602255	136603806	1552	-1	ENSG00000076003	ENSE00003159240;ENSE00002991683_ENSE00000964124;ENSE00001922971	1	1	1	A	UAGGAUAAUUU	25	1	1	GGAUAAU	25	1	1		NA	NA	NA	NA	GT	AG
2	135704036	135705299	1264	1	ENSG00000082258	ENSE00001598849_ENSE00001708332	2	1	1	A	UAAUCUUACUG	69	2	1	AUCUUAC	69	2	1		NA	NA	NA	NA	GT	TG
2	113418804	113420440	1637	1	ENSG00000144136	ENSE00000963752;ENSE00001856453_ENSE00001923899;ENSE00001958138	1	1	1	A	CACUUCAAUAA	33	1	1	CUUCAAU	33	1	1		NA	NA	NA	NA	GT	AG
2	174783514	174819600	36087	-1	ENSG00000172845	ENSE00001192467_ENSE00001192444	1	1	1	A	GAAUGUGAUUU	10374	1	1	AUGUGAU	10374	1	1		NA	NA	NA	NA	GT	AG
2	179497520	179497644	125	-1	ENSG00000155657	ENSE00002240435_ENSE00002218837	1	1	1	A	UGACUUCAUCC	22	1	1	ACUUCAU	22	1	1		NA	NA	NA	NA	GT	AG
2	191818353	191819309	957	1	ENSG00000115419	ENSE00001261357_ENSE00001261350;ENSE00001736340	3	1	1	A	AUAUAUAAUAA	28	3	1	AUAUAAU	28	3	1		NA	NA	NA	NA	GT	AG
2	190339535	190339938	404	1	ENSG00000115368	ENSE00003184083;ENSE00003118129_ENSE00001233905;ENSE00001660006;ENSE00001659344	3	1	1	A	AUUUAAUAGUG	32	3	1	UUAAUAG	32	3	1		NA	NA	NA	NA	GT	AG
2	203165091	203167643	2553	1	ENSG00000055044	ENSE00003187444;ENSE00003142306_ENSE00003151964;ENSE00003164307	1	1	1	A	CAGUGUUAAUU	33	1	1	GUGUUAA	33	1	1		NA	NA	NA	NA	GT	AG
2	220290468	220290670	203	1	ENSG00000175084	ENSE00001147439;ENSE00001811750_ENSE00001462010;ENSE00001845709	2	1	1	A	UCUGGCUAGCA	36	2	1	UGGCUAG	36	2	1		NA	NA	NA	NA	GT	AG
2	231112781	231113599	819	1	ENSG00000079263	ENSE00000922452_ENSE00000922450	1	1	1	A	GUGUCCAAGUC	41	1	1	GUCCAAG	41	1	1		NA	NA	NA	NA	GT	AG
2	220103502	220103813	312	-1	ENSG00000163521	ENSE00003053760;ENSE00002993432_ENSE00003113347;ENSE00003178920	4	1	1	A	UCUUGGAAUAG	54	4	1	UUGGAAU	54	4	1		NA	NA	NA	NA	GT	AG
3	129370639	129373809	3171	-1	ENSG00000172765	ENSE00002049629_ENSE00001322029;ENSE00002293589;ENSE00002262395	1	1	1	A	AGGCUUAACUC	24	1	1	GCUUAAC	24	1	1		NA	NA	NA	NA	TT	AG
3	126735528	126735786	259	1	ENSG00000114554	ENSE00000858364_ENSE00000858365	1	1	1	A	GGGCCCCAGCA	40	1	1	GCCCCAG	40	1	1		NA	NA	NA	NA	GT	AG
3	133894613	133894773	161	-1	ENSG00000163785	ENSE00003075843;ENSE00003202546;ENSE00003131173_ENSE00003179111;ENSE00003119374;ENSE00001885514	1	1	1	A	CUUUUUAAUAC	41	1	1	UUUUAAU	41	1	1		NA	NA	NA	NA	GT	AG
3	139085618	139085856	239	-1	ENSG00000184432	ENSE00001292150_ENSE00001312873	2	1	1	A	AUUUCUAACUU	24	2	1	UUCUAAC	24	2	1		NA	NA	NA	NA	GT	AG
3	156249287	156254446	5160	1	ENSG00000169282	ENSE00003008997;ENSE00003021261_ENSE00001885049;ENSE00001942239;ENSE00001887396;ENSE00001815809;ENSE00001805628;ENSE00001827147	1	1	1	A	ACUGCUAACAA	34	1	1	UGCUAAC	34	1	1		NA	NA	NA	NA	GC	AG
3	160219991	160222745	2755	-1	ENSG00000186432	ENSE00003008277;ENSE00003084099_ENSE00001224224	1	1	1	A	AAAACUAAUUA	33	1	1	AACUAAU	33	1	1		NA	NA	NA	NA	GT	AG
4	3134639	3136127	1489	1	ENSG00000197386	ENSE00003003260;ENSE00003117330_ENSE00002977526;ENSE00003038292	5	2	1	A	GUGUUCCAGNN	2	5	2	GUUCCAG	2	5	2		NA	NA	NA	NA	GT	AG
4	3117991	3122954	4964	1	ENSG00000197386	ENSE00003190405;ENSE00003141680_ENSE00001506819;ENSE00002047670	2	1	1	A	AACUCUGACCA	30	2	1	CUCUGAC	30	2	1		NA	NA	NA	NA	GT	AG
4	47560291	47560939	649	1	ENSG00000145246	ENSE00001319074;ENSE00002083259_ENSE00003144598;ENSE00003138112	1	1	1	A	UUAUUUCAGNN	2	1	1	AUUUCAG	2	1	1		NA	NA	NA	NA	GT	AG
4	41648911	41652409	3499	1	ENSG00000064042	ENSE00001759109_ENSE00001657808	1	1	1	A	GGGGUAUAUAU	36	1	1	GGUAUAU	36	1	1		NA	NA	NA	NA	GT	AG
4	68547310	68547836	527	-1	ENSG00000033178	ENSE00003197907;ENSE00003090351_ENSE00003064438;ENSE00003221251	1	1	1	A	UUGAGCUAUUC	25	1	1	GAGCUAU	25	1	1		NA	NA	NA	NA	GT	AG
4	87679939	87680094	156	1	ENSG00000163629	ENSE00001407850;ENSE00002087560_ENSE00003209934;ENSE00003010589	1	1	1	A	AUUUCUAAGAU	57	1	1	UUCUAAG	57	1	1		NA	NA	NA	NA	GT	AG
4	85672870	85674849	1980	-1	ENSG00000163625	ENSE00003109706;ENSE00003130969_ENSE00001729894;ENSE00002060585	1	1	1	A	GAGUCUAAUGU	36	1	1	GUCUAAU	36	1	1		NA	NA	NA	NA	GT	AG
4	95199885	95200073	189	1	ENSG00000163104	ENSE00003106925;ENSE00003062607_ENSE00003119796;ENSE00003179624	2	1	1	A	AUAUUUCAACA	45	2	1	AUUUCAA	45	2	1		NA	NA	NA	NA	GT	AG
4	109769960	109773391	3432	-1	ENSG00000188517	ENSE00001367061_ENSE00001365339	2	1	1	A	GGAGGCAAGUC	24	2	1	AGGCAAG	24	2	1		NA	NA	NA	NA	GT	AG
4	100229022	100231921	2900	-1	ENSG00000196616	ENSE00002989356;ENSE00003094020_ENSE00002069705;ENSE00001483825;ENSE00002024190;ENSE00002052265	4	1	1	A	UUGUCUAAAUG	35	4	1	GUCUAAA	35	4	1		NA	NA	NA	NA	GT	AG
4	95194868	95195888	1021	1	ENSG00000163104	ENSE00003195506;ENSE00003061940_ENSE00003106392;ENSE00003025236	2	1	1	A	AGAUGCAAAUA	24	2	1	AUGCAAA	24	2	1		NA	NA	NA	NA	GT	AG
4	122591168	122592701	1534	-1	ENSG00000164111	ENSE00003107096;ENSE00003107569_ENSE00003191725;ENSE00002080868;ENSE00003077378	12	1	1	A	GCAUUUGACCA	25	12	1	AUUUGAC	25	12	1		NA	NA	NA	NA	GT	AG
4	123195592	123197126	1535	1	ENSG00000138688	ENSE00001239070_ENSE00001239066;ENSE00001698909	1	1	1	A	AUAUUGUAACU	72	1	1	AUUGUAA	72	1	1		NA	NA	NA	NA	GT	AG
4	120079307	120085365	6059	1	ENSG00000172399	ENSE00001161357_ENSE00001161353	1	1	1	A	AGUAUUUACUU	27	1	1	UAUUUAC	27	1	1		NA	NA	NA	NA	GT	AG
4	155487152	155487640	489	1	ENSG00000171564	ENSE00003216052;ENSE00001956910;ENSE00003207236;ENSE00001930205_ENSE00003172703;ENSE00002035331;ENSE00001876734;ENSE00003112460	1	1	1	A	UCAUCUAAUGC	26	1	1	AUCUAAU	26	1	1		NA	NA	NA	NA	GT	AG
5	1064091	1064197	107	-1	ENSG00000113504	ENSE00001229352_ENSE00001606424	4	3	1	A	CACAGCCAUGC	19	4	3	CAGCCAU	19	4	3		NA	NA	NA	NA	GT	AG
5	143372	143494	123	1	ENSG00000153404	ENSE00001083898_ENSE00001136029	1	1	1	A	CCUUGGCAGCU	25	1	1	UUGGCAG	25	1	1		NA	NA	NA	NA	GT	AG
5	39393496	39394331	836	-1	ENSG00000153071	ENSE00001388207;ENSE00002049941_ENSE00001083685;ENSE00002040601;ENSE00002075410;ENSE00002062162	1	1	1	A	AUUCUUCAUCC	25	1	1	UCUUCAU	25	1	1		NA	NA	NA	NA	GT	AG
5	54623607	54624526	920	1	ENSG00000039123	ENSE00003093922;ENSE00003051301;ENSE00003214456;ENSE00002062490_ENSE00003117830;ENSE00003143789;ENSE00003216234	2	2	1	A	UGUUUUUAUGC	29	2	2	UUUUUAU	29	2	2		NA	NA	NA	NA	GT	AG
5	74880752	74882850	2099	1	ENSG00000122008	ENSE00003063749;ENSE00003131047_ENSE00003028650;ENSE00003172531	3	1	1	A	CUUGGUUAACU	54	3	1	UGGUUAA	54	3	1		NA	NA	NA	NA	GT	AG
5	86681207	86682642	1436	1	ENSG00000145715	ENSE00003123960;ENSE00003034074_ENSE00003096990;ENSE00003026682	3	1	1	A	UGCAUAUAACA	23	3	1	CAUAUAA	23	3	1		NA	NA	NA	NA	GT	AG
5	137506602	137506726	125	-1	ENSG00000112983	ENSE00003087544;ENSE00003014051;ENSE00001787091_ENSE00003193849;ENSE00003208180;ENSE00002043494	5	2	1	A	CCAGUCUACCU	24	5	2	AGUCUAC	24	5	2		NA	NA	NA	NA	GT	AG
5	133533536	133534776	1241	-1	ENSG00000113575	ENSE00001661991;ENSE00001867006_ENSE00001869825;ENSE00001926385	1	1	1	A	AACAUAAACCA	25	1	1	CAUAAAC	25	1	1		NA	NA	NA	NA	GT	AG
5	140048088	140048196	109	1	ENSG00000120314	ENSE00002978666;ENSE00002057566;ENSE00002083605;ENSE00003018909_ENSE00003071129;ENSE00003168724;ENSE00002981157	2	1	1	A	AUGCUCCAAGA	26	2	1	GCUCCAA	26	2	1		NA	NA	NA	NA	GT	AG
5	158696078	158696915	838	1	ENSG00000164332	ENSE00001083634_ENSE00001083628	1	1	1	A	AGUGAGAAAAC	25	1	1	UGAGAAA	25	1	1		NA	NA	NA	NA	GT	AG
5	149825249	149826364	1116	-1	ENSG00000164587	ENSE00001085690;ENSE00002090675;ENSE00002116658_ENSE00003046659;ENSE00003161552;ENSE00002120389	2	1	1	A	UCUUCUUAACU	22	2	1	UUCUUAA	22	2	1		NA	NA	NA	NA	GT	AG
5	172196798	172197163	366	-1	ENSG00000120129	ENSE00000769465_ENSE00000769464	12	6	2	A;A	AAGCUUGAUGA;UUGAUGAAUGU	28;24	11;1	5;1	GCUUGAU	28	11	5	GAUGAAU	24	1	1	NA	GT	AG
5	179252227	179260031	7805	1	ENSG00000161011	ENSE00003125185;ENSE00003207644;ENSE00003094276_ENSE00002271178;ENSE00002023167;ENSE00001871251	1	1	1	A	GAACUUCACGG	30	1	1	ACUUCAC	30	1	1		NA	NA	NA	NA	GT	AG
5	172196136	172196577	442	-1	ENSG00000120129	ENSE00000769464_ENSE00001876542	5	2	1	A	UCAAGUAACCA	25	5	2	AAGUAAC	25	5	2		NA	NA	NA	NA	GT	AG
5	178045780	178046838	1059	-1	ENSG00000113240	ENSE00002091676;ENSE00003181778;ENSE00002111819;ENSE00003212186_ENSE00002093858;ENSE00003214669;ENSE00003177328;ENSE00002131948;ENSE00002097166;ENSE00002137053;ENSE00002129705	2	1	1	A	AGAGAAUAAUU	28	2	1	AGAAUAA	28	2	1		NA	NA	NA	NA	GT	AG
6	26197498	26199086	1589	-1	ENSG00000197409	ENSE00001750063_ENSE00002297344	3	1	1	A	AGGCUAGACUU	23	3	1	GCUAGAC	23	3	1		NA	NA	NA	NA	GC	AG
6	17633076	17637383	4308	-1	ENSG00000124789	ENSE00000848141_ENSE00000848140	2	1	1	A	AAUUUUCAUGA	42	2	1	UUUUCAU	42	2	1		NA	NA	NA	NA	GT	AG
6	16144095	16145127	1033	1	ENSG00000007944	ENSE00000848091_ENSE00000848092	2	1	1	A	GGUGUUAAAGU	27	2	1	UGUUAAA	27	2	1		NA	NA	NA	NA	GC	AG
6	36562259	36564537	2279	1	ENSG00000112081	ENSE00001848923;ENSE00001820449_ENSE00002148108	1	1	1	A	AAUGAAUAUUU	23	1	1	UGAAUAU	23	1	1		NA	NA	NA	NA	GT	AG
6	31603827	31603985	159	1	ENSG00000204469	ENSE00001803541;ENSE00001914619;ENSE00001932409_ENSE00003135348;ENSE00001876564;ENSE00003168273	1	1	1	A	UCCUAACAGCU	28	1	1	CUAACAG	28	1	1		NA	NA	NA	NA	GT	AG
6	40998495	40999419	925	-1	ENSG00000124602	ENSE00001302613_ENSE00003106744;ENSE00002978525	2	1	1	A	ACCCCUAAGUG	29	2	1	CCCUAAG	29	2	1		NA	NA	NA	NA	GT	AG
6	42903409	42905454	2046	1	ENSG00000137161	ENSE00003023730;ENSE00003046276_ENSE00003148941;ENSE00003074803	2	1	1	A	CUGCCAUAUCU	19	2	1	GCCAUAU	19	2	1		NA	NA	NA	NA	GT	AG
6	35047446	35047597	152	1	ENSG00000064999	ENSE00003189369;ENSE00003185126_ENSE00002980298;ENSE00003121239	1	1	1	A	CCACCUGACCU	31	1	1	ACCUGAC	31	1	1		NA	NA	NA	NA	GT	AG
6	33170478	33170686	209	1	ENSG00000112473	ENSE00003150511;ENSE00003170351_ENSE00003188993;ENSE00003009340	2	2	2	A;A	GCCUCUGAUCA;AGUGGUGAUGG	28;41	1;1	1;1	UGGUGAU	41	1	1	CUCUGAU	28	1	1	NA	GT	AG
6	31947331	31948227	897	1	ENSG00000254729	ENSE00002978477_ENSE00003140808	2	1	1	A	AGCCCUCAUCU	28	2	1	CCCUCAU	28	2	1		NA	NA	NA	NA	GT	AG
6	35446102	35446210	109	-1	ENSG00000007866	ENSE00000849643_ENSE00000747101	1	1	1	A	GAUGCUGAGGG	32	1	1	UGCUGAG	32	1	1		NA	NA	NA	NA	GT	AG
6	36887478	36891122	3645	1	ENSG00000198663	ENSE00001272611_ENSE00001431667;ENSE00002294996;ENSE00001461235	1	1	1	A	GACAUUUACAU	31	1	1	CAUUUAC	31	1	1		NA	NA	NA	NA	GT	AG
6	30460361	30460525	165	1	ENSG00000204592	ENSE00001599023_ENSE00001706094	1	1	1	A	GUGACUGACCU	34	1	1	GACUGAC	34	1	1		NA	NA	NA	NA	GT	AG
6	43550879	43555008	4130	1	ENSG00000170734	ENSE00003094665;ENSE00003148510_ENSE00000752927;ENSE00001677891	1	1	1	A	AAAACUCAAAC	2785	1	1	AACUCAA	2785	1	1		NA	NA	NA	NA	GT	AG
6	44413605	44414343	739	1	ENSG00000096401	ENSE00000619318_ENSE00001948716	1	1	1	A	UAGUUACAUCU	34	1	1	GUUACAU	34	1	1		NA	NA	NA	NA	GT	AG
6	57017150	57018658	1509	1	ENSG00000112200	ENSE00000850653;ENSE00002073868_ENSE00000757336;ENSE00002045894;ENSE00002024491	3	1	1	A	CAUGCUGAUUU	36	3	1	UGCUGAU	36	3	1		NA	NA	NA	NA	GT	AG
6	90383182	90383822	641	-1	ENSG00000112159	ENSE00002236600_ENSE00002214050	2	1	1	A	UUUCAACAUUG	21	2	1	UCAACAU	21	2	1		NA	NA	NA	NA	GT	AG
6	90435116	90437551	2436	-1	ENSG00000112159	ENSE00002223900_ENSE00002243739	2	1	1	A	UUUUAAUAACU	1407	2	1	UUAAUAA	1407	2	1		NA	NA	NA	NA	GT	AG
6	90422506	90422866	361	-1	ENSG00000112159	ENSE00002250105_ENSE00002238686	2	1	1	A	UGGUACCACUG	28	2	1	GUACCAC	28	2	1		NA	NA	NA	NA	GT	AG
6	74229240	74229605	366	-1	ENSG00000156508	ENSE00001313030;ENSE00001191875;ENSE00002694655_ENSE00003179938;ENSE00003065570;ENSE00001863601;ENSE00001672032	1	1	1	A	UUUAGUAACCA	28	1	1	UAGUAAC	28	1	1		NA	NA	NA	NA	GT	AG
6	106553809	106554245	437	1	ENSG00000057657	ENSE00002258316_ENSE00002243998	1	1	1	A	CAGAGCUAACA	22	1	1	GAGCUAA	22	1	1		NA	NA	NA	NA	GT	AG
6	109828004	109830381	2378	-1	ENSG00000155085	ENSE00001754039_ENSE00001801211	1	1	1	A	AAUGUGGAAUU	30	1	1	UGUGGAA	30	1	1		NA	NA	NA	NA	GT	AG
6	122734795	122737365	2571	1	ENSG00000025156	ENSE00000762902_ENSE00000762903	1	1	1	A	UUUUUUGAUUG	44	1	1	UUUUGAU	44	1	1		NA	NA	NA	NA	GT	AG
6	110532007	110533335	1329	1	ENSG00000168438	ENSE00002471357_ENSE00002471480	1	1	1	A	UUUAUUGAUUU	24	1	1	UAUUGAU	24	1	1		NA	NA	NA	NA	GT	AG
6	128400064	128403581	3518	-1	ENSG00000152894	ENSE00003088042;ENSE00003092248_ENSE00003154875;ENSE00003040477	1	1	1	A	UUACUGUAAAU	41	1	1	ACUGUAA	41	1	1		NA	NA	NA	NA	GT	AG
1	33318768	33321524	2757	1	ENSG00000116497	ENSE00003091123;ENSE00003100996;ENSE00001812476_ENSE00001460658;ENSE00001460656;ENSE00002145210;ENSE00002173873;ENSE00002196011;ENSE00001919509	3	1	1	A	UUGAAAUAGCC	34	3	1	GAAAUAG	34	3	1		NA	NA	NA	NA	GT	AG
1	46083264	46083732	469	1	ENSG00000132780	ENSE00002991928;ENSE00002984110;ENSE00001949330_ENSE00002312695;ENSE00003005158;ENSE00001815639;ENSE00003151131;ENSE00001829915;ENSE00003034752;ENSE00002172614;ENSE00003180126	4	1	1	A	CUCACUCAUGC	26	4	1	CACUCAU	26	4	1		NA	NA	NA	NA	GT	AG
1	45472468	45472622	155	-1	ENSG00000126107	ENSE00003128410;ENSE00003179441;ENSE00001891721;ENSE00001868326_ENSE00003102792;ENSE00003159658	3	1	1	A	CCAGCUGAGGG	19	3	1	AGCUGAG	19	3	1		NA	NA	NA	NA	GT	AG
1	45292755	45292838	84	-1	ENSG00000117425	ENSE00001045284_ENSE00001045271	1	1	1	A	GGCCUUCAGCC	20	1	1	CCUUCAG	20	1	1		NA	NA	NA	NA	GT	AG
1	32627648	32627961	314	1	ENSG00000025800	ENSE00003096808;ENSE00003070370_ENSE00003162605;ENSE00003210768;ENSE00001926399	1	1	1	A	CCCUGUGAGUC	26	1	1	CUGUGAG	26	1	1		NA	NA	NA	NA	GT	AG
1	43898276	43898398	123	1	ENSG00000198198	ENSE00001249860_ENSE00001249850	2	1	1	A	AGGCUCCAGGC	23	2	1	GCUCCAG	23	2	1		NA	NA	NA	NA	GT	AG
1	31901916	31902243	328	1	ENSG00000168528	ENSE00003146054;ENSE00003041308_ENSE00003070264;ENSE00003024056	2	1	1	A	GAGGGUGAUUG	19	2	1	GGGUGAU	19	2	1		NA	NA	NA	NA	GT	AG
1	53453809	53458929	5121	1	ENSG00000116171	ENSE00002148975_ENSE00001822406;ENSE00001523178	1	1	1	A	UGACACAAUGG	47	1	1	ACACAAU	47	1	1		NA	NA	NA	NA	GT	AG
6	160494502	160494788	287	1	ENSG00000197081	ENSE00001086773;ENSE00001817521_ENSE00001086785;ENSE00001914892	2	1	1	A	UAGACUCAAAG	24	2	1	GACUCAA	24	2	1		NA	NA	NA	NA	GT	AG
7	33192464	33195249	2786	1	ENSG00000122507	ENSE00002997522;ENSE00003118404;ENSE00003061233_ENSE00001795657;ENSE00003218698;ENSE00003142559	1	1	1	A	CUUUAAAAACU	19	1	1	UUAAAAA	19	1	1		NA	NA	NA	NA	GT	AG
7	45140026	45140856	831	-1	ENSG00000136270	ENSE00003088479;ENSE00003141939_ENSE00001893480;ENSE00003090405;ENSE00003114555	1	1	1	A	CUUGCCCAUGU	30	1	1	UGCCCAU	30	1	1		NA	NA	NA	NA	GT	AG
7	74606290	74607765	1476	-1	ENSG00000232561	ENSE00002490780_ENSE00001779027	5	2	1	A	AAUUGUUAUAC	25	5	2	UUGUUAU	25	5	2		NA	NA	NA	NA	GT	TT
7	100281256	100281440	185	-1	ENSG00000146830	ENSE00001481346_ENSE00001481344	1	1	1	A	CACCUGCAGCC	29	1	1	CCUGCAG	29	1	1		NA	NA	NA	NA	GT	AG
7	100773936	100775155	1220	1	ENSG00000106366	ENSE00000712140_ENSE00000712144	1	1	1	A	AUCGUCUAACU	37	1	1	CGUCUAA	37	1	1		NA	NA	NA	NA	GT	AG
7	99951636	99952765	1130	1	ENSG00000121716	ENSE00001132755;ENSE00001957977;ENSE00001693405;ENSE00001606299;ENSE00001723416_ENSE00001391634;ENSE00001877694	3	1	1	A	AGAAGACACAG	25	3	1	AAGACAC	25	3	1		NA	NA	NA	NA	GT	AG
7	100160306	100160485	180	1	ENSG00000106351	ENSE00003070012;ENSE00003020329_ENSE00002513642;ENSE00003025636;ENSE00003112851;ENSE00001841342	2	1	1	A	AAAAGUAACCA	43	2	1	AAGUAAC	43	2	1		NA	NA	NA	NA	GT	AG
7	105909047	105909599	553	-1	ENSG00000105835	ENSE00003128099;ENSE00003088646;ENSE00001874993_ENSE00003193313;ENSE00003169537;ENSE00001815866	1	1	1	A	UGGUAUUAUUA	53	1	1	GUAUUAU	53	1	1		NA	NA	NA	NA	GT	AG
