# Supplementary material for: LaSSO, a strategy for genome-wide mapping of intronic lariats and branch points using RNA-seq
Source: HighWire-hosted journal article supplement (doi:10.1101/gr.166819.113), 2014-04-07
Supplement: Supplemental_Table12.xlsx [file Supplemental_Table12.xlsx]

## Sheet: HumanTableSkip_sup.txt
Supplemental Table 12. Branch-sites represnting skipping events identified by LaSSO using human dataset (accession number GSE30611)
Branch-point index: the distance of branch-point from 3' splice acceptor site
BP-Branch-point; BS-Branch-site; Lar-Lariat; Int-Intron; sur_exons-flanking exons for each given intron; 5'-3' introns are separated by an underscore, multiple flanking exons by a semi-colon, and introns are separated by three forward slashes; LarSeq: number of unique sequence reads that straddle the lariat; Note that only coordinates of terminal intron where lariat was fromed are given.
Chromosome	start	end	width	strand	gene	sur_exons	LarReads	LarSeq	NoBranches	BranchpointLetters	BranchSites	BranchPointIdx	BranchPointReads	SeqPerBranch	PrimaryBS_Seq_LaSSO	PrimaryBP_idx_LaSSO	PrimaryBP_reads_LaSSO	PrimaryBP_SeqPerBranch_LaSSO	SecondaryBS_Seq_LaSSO	SecondaryBP_idx_LaSSO	SecondaryBP_reads_LaSSO	SecondaryBP_SeqPerBranch_LaSSO	AdditionalBP_LaSSO
7	139102476	139106908	4433	1	ENSG00000146963	ENSE00001860916_ENSE00001917629///ENSE00003031386;ENSE00003204020;ENSE00001917629_ENSE00002243388;ENSE00002213646;ENSE00001402065;ENSE00001642473;ENSE00001850799;ENSE00001855637	2	2	2	A;A	CUUUCUCAUCU;CUCGAGCACUU	2321;2329	1;1	1;1	UUCUCAU	2321	1	1	CGAGCAC	2329	1	1	NA
10	102279712	102286731	7020	-1	ENSG00000075826	ENSE00001891142_ENSE00003046930;ENSE00003128644///ENSE00003054342_ENSE00001623692	5	2	1	A	CUGUGUUAUUU	3786	5	2	GUGUUAU	3786	5	2		NA	NA	NA	NA
11	66406224	66407170	947	1	ENSG00000248643	ENSE00003092917;ENSE00003191954;ENSE00003173121;ENSE00002052569_ENSE00003207622///ENSE00003207622_ENSE00003004538;ENSE00003103692	2	1	1	A	UUGUCAGAUGU	22	2	1	GUCAGAU	22	2	1		NA	NA	NA	NA
11	77327741	77329577	1837	-1	ENSG00000074201	ENSE00002151269_ENSE00002193507///ENSE00002146282_ENSE00002195859;ENSE00001040434;ENSE00002152906;ENSE00002160794;ENSE00002432208	1	1	1	A	CAACUUCAGUA	1618	1	1	ACUUCAG	1618	1	1		NA	NA	NA	NA
11	116827781	116968858	141078	-1	ENSG00000160584	ENSE00003212484;ENSE00003028620_ENSE00003129778;ENSE00003017121///ENSE00001633243;ENSE00001466675;ENSE00003187750;ENSE00003090235;ENSE00003163167;ENSE00003124297;ENSE00002540313;ENSE00001855533_ENSE00003209872;ENSE00003071015	1	1	1	A	CACUCUGAAUC	78722	1	1	CUCUGAA	78722	1	1		NA	NA	NA	NA
12	28565872	28603093	37222	1	ENSG00000123106	ENSE00003183016;ENSE00003173622_ENSE00002312069///ENSE00002312069_ENSE00003067965;ENSE00002983759;ENSE00003173446;ENSE00002324085	2	1	1	A	GAGCCAUAAUA	28	2	1	GCCAUAA	28	2	1		NA	NA	NA	NA
12	100100403	100166487	66085	-1	ENSG00000185046	ENSE00002352515_ENSE00003140247;ENSE00003160772;ENSE00003187303;ENSE00002388630///ENSE00002340664_ENSE00002387019	1	1	1	A	GAAGGAGAUAU	13387	1	1	AGGAGAU	13387	1	1		NA	NA	NA	NA
13	40301686	40325082	23397	1	ENSG00000133103	ENSE00002994295;ENSE00003044779_ENSE00002985967;ENSE00003043589///ENSE00003200314;ENSE00003028861_ENSE00001934927;ENSE00001481618	1	1	1	A	CAAUGUAAACU	20866	1	1	AUGUAAA	20866	1	1		NA	NA	NA	NA
13	20235231	20235837	607	1	ENSG00000196199	ENSE00003208920;ENSE00003147435_ENSE00001946354///ENSE00001946354_ENSE00001598583	7	1	1	A	AAAGAUUAACA	31	7	1	AGAUUAA	31	7	1		NA	NA	NA	NA
14	64674911	64675475	565	1	ENSG00000054654	ENSE00003109776;ENSE00003175241;ENSE00003090093;ENSE00003021902_ENSE00002443352///ENSE00002468242_ENSE00002987306;ENSE00002990896;ENSE00002977871;ENSE00003083135	1	1	1	A	CAUCUCAAGAG	29	1	1	UCUCAAG	29	1	1		NA	NA	NA	NA
15	89931978	89932575	598	1	ENSG00000255571	ENSE00002257487;ENSE00002538471_ENSE00002550793///ENSE00002537661_ENSE00002492177	4	1	1	A	GCAGCUCACCG	24	4	1	AGCUCAC	24	4	1		NA	NA	NA	NA
1	12476881	12516053	39173	1	ENSG00000048707	ENSE00001815580_ENSE00001408105///ENSE00003034706;ENSE00003154778_ENSE00000819007;ENSE00001852215	1	1	1	A	CAUGACCAAAA	20717	1	1	UGACCAA	20717	1	1		NA	NA	NA	NA
16	29418348	29519762	101415	1	ENSG00000198106	ENSE00002209222_ENSE00002290466///ENSE00002290466_ENSE00002294825	2	2	2	A;A	AAAUAUGAUUU;AUUUUUGAGUC	43476;43786	1;1	1;1	AUAUGAU	43476	1	1	UUUUGAG	43786	1	1	NA
17	55748936	55752278	3343	1	ENSG00000153944	ENSE00003201783;ENSE00003060376_ENSE00002711759///ENSE00002711759_ENSE00001662724;ENSE00002704420	2	1	1	A	UGGCCUCAUAC	28	2	1	GCCUCAU	28	2	1		NA	NA	NA	NA
17	73664250	73664595	346	1	ENSG00000161526	ENSE00002717080;ENSE00002710999;ENSE00003070121;ENSE00003107958;ENSE00002718373;ENSE00002254335;ENSE00001553244;ENSE00003206961;ENSE00003089985;ENSE00002727557;ENSE00002703382;ENSE00002700372;ENSE00002686954_ENSE00002722734///ENSE00002722734_ENSE00003187369;ENSE00003027409	1	1	1	A	ACAUUGUAACU	57	1	1	AUUGUAA	57	1	1		NA	NA	NA	NA
17	62527220	62528007	788	1	ENSG00000258890	ENSE00003055046;ENSE00003125709;ENSE00002711722_ENSE00003125454;ENSE00002521346;ENSE00002694514;ENSE00003018107///ENSE00002694514_ENSE00003174325;ENSE00003058127;ENSE00002535755;ENSE00002525882;ENSE00002691335;ENSE00002720113	1	1	1	A	ACCUUUUAUUU	31	1	1	CUUUUAU	31	1	1		NA	NA	NA	NA
17	76202132	76202991	860	1	ENSG00000183077	ENSE00002891286_ENSE00003021555;ENSE00003222209///ENSE00003094270;ENSE00003158495;ENSE00002980706_ENSE00001465245;ENSE00002838907;ENSE00002901669;ENSE00002897631;ENSE00002838617;ENSE00002942280;ENSE00002876475	2	2	2	A;A	AAAAAAAAAAA	559;560	1;1	1;1	AAAAAAA	559	1	1		NA	NA	NA	NA
19	12903397	12935991	32595	-1	ENSG00000095066	ENSE00002966858_ENSE00001632736;ENSE00002860937;ENSE00002955253///ENSE00002857355_ENSE00002797673	5	2	1	A	AGGUGUGAGUC	4238	5	2	GUGUGAG	4238	5	2		NA	NA	NA	NA
19	36558913	36562457	3545	1	ENSG00000075702	ENSE00002820620_ENSE00001742964///ENSE00000953235_ENSE00001057359;ENSE00002867967	1	1	1	A	UUUCCCCACCU	2754	1	1	UCCCCAC	2754	1	1		NA	NA	NA	NA
19	34989535	34991033	1499	1	ENSG00000142279	ENSE00001757670_ENSE00002870177///ENSE00002870177_ENSE00002751039;ENSE00001303250	1	1	1	A	UCUGCUGACUC	32	1	1	UGCUGAC	32	1	1		NA	NA	NA	NA
19	40503177	40503767	591	1	ENSG00000187187	ENSE00001410828;ENSE00003056151;ENSE00003036812;ENSE00003142115;ENSE00003124813;ENSE00003065284_ENSE00003083249///ENSE00003083249_ENSE00001414802	1	1	1	A	CUGUCUCAUGA	42	1	1	GUCUCAU	42	1	1		NA	NA	NA	NA
20	1458051	1458910	860	-1	ENSG00000196209	ENSE00001407026_ENSE00001932591///ENSE00000858603_ENSE00001489285	3	3	2	A;A	CGUCUCAAAAA;CCGUCUCAAAA	286;287	2;1	2;1	UCUCAAA	286	2	2		NA	NA	NA	NA
21	36837628	36952957	115330	-1	ENSG00000159216	ENSE00001927669_ENSE00001936216///ENSE00001851690;ENSE00001858662_ENSE00001891207	1	1	1	A	UACGUGAAGAA	33251	1	1	CGUGAAG	33251	1	1		NA	NA	NA	NA
X	77157365	77158139	775	1	ENSG00000131174	ENSE00003102809;ENSE00003209790;ENSE00001460307_ENSE00001838850///ENSE00001838850_ENSE00003168115;ENSE00002986929;ENSE00001842929	3	1	1	A	ACAAUUGAUAA	39	3	1	AAUUGAU	39	3	1		NA	NA	NA	NA
2	120925584	120932416	6833	1	ENSG00000115109	ENSE00001778950_ENSE00001858847///ENSE00001020716;ENSE00001665378_ENSE00001602197;ENSE00001925257;ENSE00001689738	4	1	1	A	GCCAACCAACC	3188	4	1	CAACCAA	3188	4	1		NA	NA	NA	NA
3	79639112	79816901	177790	-1	ENSG00000169855	ENSE00003087913;ENSE00003037752_ENSE00003179750;ENSE00003190656;ENSE00003133581///ENSE00001915645_ENSE00001895048	4	1	1	A	CACUCAUAGGU	22298	4	1	CUCAUAG	22298	4	1		NA	NA	NA	NA
4	40546524	40631412	84889	-1	ENSG00000163694	ENSE00002075255_ENSE00001077383///ENSE00001489861;ENSE00002025290;ENSE00002036719_ENSE00001489860;ENSE00002044926;ENSE00002075255	1	1	1	A	AGUGUAAAAAG	13577	1	1	UGUAAAA	13577	1	1		NA	NA	NA	NA
4	154231414	154236636	5223	1	ENSG00000109654	ENSE00003022041;ENSE00003175080_ENSE00001932595///ENSE00001932595_ENSE00000821092	2	1	1	A	AAUUUUUAUGA	22	2	1	UUUUUAU	22	2	1		NA	NA	NA	NA
5	10251006	10254256	3251	1	ENSG00000150753	ENSE00002069217;ENSE00001314643;ENSE00002051628;ENSE00002074033;ENSE00003013086;ENSE00003067157;ENSE00002030740_ENSE00002081567///ENSE00002081567;ENSE00002084391_ENSE00002980092;ENSE00003009786;ENSE00002067396;ENSE00003062440	1	1	1	A	AUAUGUAACAG	32	1	1	AUGUAAC	32	1	1		NA	NA	NA	NA
5	93872833	93918137	45305	-1	ENSG00000185261	ENSE00002025397_ENSE00001706022///ENSE00001302637_ENSE00001325072	1	1	1	A	GAGAAUAAUGA	32339	1	1	GAAUAAU	32339	1	1		NA	NA	NA	NA
6	21065460	21108631	43172	1	ENSG00000145996	ENSE00001083336_ENSE00001083330///ENSE00001083321_ENSE00001083332	2	1	1	A	AGAGCAAAGUA	18575	2	1	AGCAAAG	18575	2	1		NA	NA	NA	NA
1	47069967	47082382	12416	-1	ENSG00000079277	ENSE00001824483_ENSE00003172528;ENSE00003197124;ENSE00002987687///ENSE00002193741_ENSE00001456519;ENSE00001635563	1	1	1	A	CUAAAGCAGCC	3425	1	1	AAAGCAG	3425	1	1		NA	NA	NA	NA
7	22540118	22672428	132311	-1	ENSG00000105889	ENSE00001556648_ENSE00001558228///ENSE00001636600_ENSE00001908332	4	3	2	A;A	UCUGGUAAAAA;UUCUGGUAAAA	10349;10350	3;1	2;1	UGGUAAA	10349	3	2		NA	NA	NA	NA
7	87849395	87856223	6829	-1	ENSG00000075142	ENSE00001901895_ENSE00002994451;ENSE00003111463;ENSE00001660223;ENSE00001688541///ENSE00001805938;ENSE00001519088;ENSE00001833872_ENSE00000877269	1	1	1	A	AUGGAAUACUA	1963	1	1	GGAAUAC	1963	1	1		NA	NA	NA	NA
